# Supplementary material
Source: publisher figshare collection journal article supplement (https://wiley.figshare.com/articles/dataset/_/18783164)
Supplement: Supplementary file 1 [file 1]

| Time     | Al       | Ak       | Af       | Ap       | Ar       | Ag       | Ab       | 0 |
|----------|----------|----------|----------|----------|----------|----------|----------|---|
|          | 0        | 0        | 0        | 0        | 0        | 0        | 0        | 0 |
| 0.061287 | 0.039064 | 0.0388   | 0.142146 | 0.909317 | 0.340076 | 0.002734 | 0.000157 |   |
| 0.122574 | 0.081694 | 0.062248 | 0.339289 | 2.086104 | 0.780272 | 0.006289 | 0.000375 |   |
| 0.183861 | 0.11905  | 0.082451 | 0.548744 | 3.243382 | 1.213318 | 0.009803 | 0.000607 |   |
| 0.245148 | 0.153403 | 0.101914 | 0.768533 | 4.370553 | 1.635283 | 0.013243 | 0.000851 |   |
| 0.306435 | 0.185948 | 0.120823 | 0.998142 | 5.467038 | 2.045981 | 0.016604 | 0.001105 |   |
| 0.367722 | 0.217231 | 0.139206 | 1.237225 | 6.533348 | 2.445621 | 0.019887 | 0.001371 |   |
| 0.429009 | 0.247503 | 0.15708  | 1.485475 | 7.570197 | 2.834488 | 0.023092 | 0.001646 |   |
| 0.490296 | 0.276885 | 0.174459 | 1.742605 | 8.578368 | 3.212883 | 0.026221 | 0.001932 |   |
| 0.551583 | 0.305445 | 0.191359 | 2.008341 | 9.558651 | 3.581109 | 0.029274 | 0.002227 |   |
| 0.61287  | 0.333225 | 0.207793 | 2.282419 | 10.51183 | 3.939461 | 0.032254 | 0.002531 |   |
| 0.674157 | 0.360254 | 0.223773 | 2.564585 | 11.43868 | 4.288229 | 0.03516  | 0.002845 |   |
| 0.735444 | 0.386558 | 0.239314 | 2.854591 | 12.33995 | 4.627688 | 0.037995 | 0.003168 |   |
| 0.796731 | 0.412158 | 0.254427 | 3.152196 | 13.21637 | 4.958108 | 0.04076  | 0.003499 |   |
| 0.858018 | 0.437075 | 0.269124 | 3.457168 | 14.06865 | 5.279747 | 0.043456 | 0.003839 |   |
| 0.919305 | 0.46133  | 0.283419 | 3.769279 | 14.89748 | 5.592854 | 0.046084 | 0.004186 |   |
| 0.980592 | 0.484941 | 0.297321 | 4.088309 | 15.70352 | 5.897672 | 0.048647 | 0.004542 |   |
| 1.041879 | 0.507927 | 0.310843 | 4.414044 | 16.48744 | 6.194434 | 0.051145 | 0.004905 |   |
| 1.103166 | 0.530305 | 0.323995 | 4.746277 | 17.24986 | 6.483364 | 0.05358  | 0.005276 |   |
| 1.164454 | 0.552092 | 0.336788 | 5.084805 | 17.9914  | 6.764683 | 0.055952 | 0.005653 |   |
| 1.225741 | 0.573305 | 0.349231 | 5.429433 | 18.71265 | 7.038601 | 0.058265 | 0.006038 |   |
| 1.287028 | 0.593959 | 0.361335 | 5.779972 | 19.41419 | 7.305317 | 0.060518 | 0.00643  |   |
| 1.348315 | 0.61407  | 0.37311  | 6.136234 | 20.09658 | 7.565036 | 0.062714 | 0.006828 |   |
| 1.409602 | 0.633652 | 0.384565 | 6.498041 | 20.76037 | 7.817946 | 0.064853 | 0.007232 |   |
| 1.470889 | 0.65272  | 0.395708 | 6.865222 | 21.40609 | 8.06423  | 0.066937 | 0.007643 |   |
| 1.532176 | 0.671289 | 0.406549 | 7.237601 | 22.03425 | 8.304076 | 0.068967 | 0.00806  |   |
| 1.593463 | 0.689372 | 0.417097 | 7.615018 | 22.64535 | 8.537654 | 0.070945 | 0.008482 |   |
| 1.65475  | 0.706982 | 0.427359 | 7.997312 | 23.23988 | 8.765134 | 0.072872 | 0.00891  |   |
| 1.716037 | 0.724132 | 0.437344 | 8.384325 | 23.81831 | 8.986685 | 0.074749 | 0.009344 |   |
| 1.777324 | 0.740835 | 0.44706  | 8.775909 | 24.38109 | 9.202465 | 0.076577 | 0.009783 |   |
| 1.838611 | 0.757103 | 0.456513 | 9.171916 | 24.92867 | 9.412631 | 0.078358 | 0.010227 |   |
| 1.899898 | 0.772948 | 0.465713 | 9.572201 | 25.46149 | 9.617336 | 0.080092 | 0.010676 |   |
| 1.961185 | 0.788381 | 0.474666 | 9.976629 | 25.97996 | 9.816725 | 0.081782 | 0.01113  |   |
| 2.022472 | 0.803412 | 0.483378 | 10.38506 | 26.48449 | 10.01094 | 0.083427 | 0.011589 |   |
| 2.083759 | 0.818054 | 0.491857 | 10.79737 | 26.97548 | 10.20013 | 0.08503  | 0.012053 |   |
| 2.145046 | 0.832317 | 0.50011  | 11.21343 | 27.45331 | 10.38442 | 0.086591 | 0.01252  |   |
| 2.206333 | 0.846211 | 0.508142 | 11.63311 | 27.91835 | 10.56395 | 0.088111 | 0.012992 |   |
| 2.26762  | 0.859745 | 0.51596  | 12.05629 | 28.37096 | 10.73883 | 0.089592 | 0.013468 |   |
| 2.328907 | 0.872929 | 0.52357  | 12.48287 | 28.8115  | 10.90921 | 0.091034 | 0.013949 |   |
| 2.390194 | 0.885774 | 0.530978 | 12.91271 | 29.24032 | 11.0752  | 0.092439 | 0.014433 |   |
| 2.451481 | 0.898287 | 0.53819  | 13.34572 | 29.65772 | 11.23691 | 0.093807 | 0.014921 |   |
| 2.512768 | 0.910479 | 0.54521  | 13.78179 | 30.06404 | 11.39446 | 0.095139 | 0.015412 |   |
| 2.574055 | 0.922357 | 0.552045 | 14.22082 | 30.4596  | 11.54797 | 0.096437 | 0.015907 |   |
| 2.635342 | 0.93393  | 0.5587   | 14.66269 | 30.84469 | 11.69753 | 0.097701 | 0.016406 |   |
| 2.696629 | 0.945206 | 0.56518  | 15.10733 | 31.21961 | 11.84326 | 0.098933 | 0.016908 |   |
| 2.757916 | 0.956193 | 0.571489 | 15.55462 | 31.58465 | 11.98526 | 0.100132 | 0.017413 |   |

|          |          |          |          |          |          |          |          |
|----------|----------|----------|----------|----------|----------|----------|----------|
| 2.819203 | 0.966899 | 0.577632 | 16.00447 | 31.94007 | 12.12363 | 0.1013   | 0.017922 |
| 2.88049  | 0.977332 | 0.583615 | 16.45681 | 32.28617 | 12.25846 | 0.102439 | 0.018433 |
| 2.941777 | 0.987499 | 0.589441 | 16.91153 | 32.62319 | 12.38986 | 0.103547 | 0.018947 |
| 3.003064 | 0.997407 | 0.595116 | 17.36856 | 32.9514  | 12.51791 | 0.104627 | 0.019464 |
| 3.064351 | 1.007062 | 0.600642 | 17.82781 | 33.27103 | 12.6427  | 0.105679 | 0.019984 |
| 3.125638 | 1.016473 | 0.606025 | 18.28919 | 33.58234 | 12.76433 | 0.106704 | 0.020507 |
| 3.186925 | 1.025645 | 0.611269 | 18.75264 | 33.88556 | 12.88287 | 0.107703 | 0.021032 |
| 3.248212 | 1.034584 | 0.616377 | 19.21808 | 34.18091 | 12.99841 | 0.108676 | 0.02156  |
| 3.309499 | 1.043298 | 0.621353 | 19.68543 | 34.46862 | 13.11103 | 0.109623 | 0.02209  |
| 3.370787 | 1.051793 | 0.626201 | 20.15462 | 34.74889 | 13.22081 | 0.110547 | 0.022623 |
| 3.432074 | 1.060073 | 0.630925 | 20.62558 | 35.02195 | 13.32783 | 0.111447 | 0.023158 |
| 3.493361 | 1.068145 | 0.635527 | 21.09824 | 35.28798 | 13.43215 | 0.112324 | 0.023694 |
| 3.554648 | 1.076015 | 0.640012 | 21.57254 | 35.54719 | 13.53386 | 0.113179 | 0.024234 |
| 3.615935 | 1.083688 | 0.644383 | 22.04841 | 35.79978 | 13.63302 | 0.114012 | 0.024775 |
| 3.677222 | 1.091169 | 0.648642 | 22.5258  | 36.04591 | 13.7297  | 0.114823 | 0.025318 |
| 3.738509 | 1.098463 | 0.652794 | 23.00463 | 36.28578 | 13.82397 | 0.115614 | 0.025863 |
| 3.799796 | 1.105576 | 0.65684  | 23.48486 | 36.51956 | 13.91589 | 0.116385 | 0.02641  |
| 3.861083 | 1.112513 | 0.660784 | 23.96643 | 36.74741 | 14.00553 | 0.117137 | 0.026959 |
| 3.92237  | 1.119277 | 0.664629 | 24.44927 | 36.96951 | 14.09294 | 0.11787  | 0.027509 |
| 3.983657 | 1.125875 | 0.668377 | 24.93335 | 37.18601 | 14.1782  | 0.118584 | 0.028061 |
| 4.044944 | 1.132309 | 0.672032 | 25.41859 | 37.39708 | 14.26134 | 0.119281 | 0.028615 |
| 4.106231 | 1.138586 | 0.675595 | 25.90496 | 37.60285 | 14.34244 | 0.11996  | 0.02917  |
| 4.167518 | 1.144708 | 0.67907  | 26.39241 | 37.80349 | 14.42155 | 0.120622 | 0.029727 |
| 4.228805 | 1.150681 | 0.682458 | 26.88088 | 37.99912 | 14.49872 | 0.121267 | 0.030286 |
| 4.290092 | 1.156507 | 0.685763 | 27.37033 | 38.1899  | 14.574   | 0.121897 | 0.030845 |
| 4.351379 | 1.162192 | 0.688986 | 27.86072 | 38.37596 | 14.64745 | 0.122511 | 0.031406 |
| 4.412666 | 1.167739 | 0.69213  | 28.352   | 38.55739 | 14.7191  | 0.12311  | 0.031969 |
| 4.473953 | 1.17315  | 0.695196 | 28.84413 | 38.73436 | 14.78901 | 0.123694 | 0.032532 |
| 4.53524  | 1.178431 | 0.698187 | 29.33708 | 38.90697 | 14.85723 | 0.124264 | 0.033097 |
| 4.596527 | 1.183585 | 0.701106 | 29.83079 | 39.07535 | 14.92381 | 0.124819 | 0.033663 |
| 4.657814 | 1.188614 | 0.703953 | 30.32524 | 39.23962 | 14.98878 | 0.125362 | 0.034231 |
| 4.719101 | 1.193524 | 0.706731 | 30.82037 | 39.39989 | 15.05219 | 0.125891 | 0.034799 |
| 4.780388 | 1.198316 | 0.709443 | 31.31616 | 39.55628 | 15.11408 | 0.126407 | 0.035368 |
| 4.841675 | 1.202994 | 0.712089 | 31.81256 | 39.7089  | 15.1745  | 0.126911 | 0.035938 |
| 4.902962 | 1.207561 | 0.714672 | 32.30955 | 39.85785 | 15.23348 | 0.127402 | 0.03651  |
| 4.964249 | 1.21202  | 0.717194 | 32.80707 | 40.00325 | 15.29107 | 0.127882 | 0.037082 |
| 5.025536 | 1.216375 | 0.719656 | 33.30511 | 40.1452  | 15.34731 | 0.12835  | 0.037655 |
| 5.086823 | 1.220628 | 0.722061 | 33.80362 | 40.2838  | 15.40223 | 0.128808 | 0.038229 |
| 5.14811  | 1.224783 | 0.724409 | 34.30258 | 40.41916 | 15.45587 | 0.129254 | 0.038804 |
| 5.209397 | 1.22884  | 0.726702 | 34.80196 | 40.55129 | 15.50826 | 0.12969  | 0.039379 |
| 5.270684 | 1.232803 | 0.728941 | 35.30175 | 40.68029 | 15.55941 | 0.130116 | 0.039956 |
| 5.331971 | 1.236674 | 0.731128 | 35.8019  | 40.80629 | 15.60939 | 0.130531 | 0.040533 |
| 5.393258 | 1.240457 | 0.733264 | 36.30237 | 40.92937 | 15.65822 | 0.130937 | 0.041111 |
| 5.454545 | 1.244153 | 0.735352 | 36.80316 | 41.04961 | 15.70593 | 0.131334 | 0.041689 |
| 5.515832 | 1.247765 | 0.737392 | 37.30422 | 41.1671  | 15.75255 | 0.131721 | 0.042268 |
| 5.57712  | 1.251296 | 0.739386 | 37.80553 | 41.28191 | 15.79812 | 0.1321   | 0.042848 |
| 5.638407 | 1.254748 | 0.741335 | 38.30706 | 41.39413 | 15.84266 | 0.132469 | 0.043428 |

|          |          |          |          |          |          |          |          |
|----------|----------|----------|----------|----------|----------|----------|----------|
| 5.699694 | 1.258122 | 0.743241 | 38.8088  | 41.50382 | 15.88621 | 0.132831 | 0.044009 |
| 5.760981 | 1.261421 | 0.745103 | 39.31073 | 41.61101 | 15.92877 | 0.133184 | 0.04459  |
| 5.822268 | 1.264646 | 0.746924 | 39.81282 | 41.7158  | 15.97038 | 0.133529 | 0.045172 |
| 5.883555 | 1.2678   | 0.748705 | 40.31504 | 41.81825 | 16.01107 | 0.133867 | 0.045754 |
| 5.944842 | 1.270885 | 0.750446 | 40.81738 | 41.91844 | 16.05087 | 0.134197 | 0.046337 |
| 6.006129 | 1.273902 | 0.752149 | 41.31982 | 42.01641 | 16.08979 | 0.134519 | 0.04692  |
| 6.067416 | 1.276854 | 0.753816 | 41.82234 | 42.11224 | 16.12786 | 0.134835 | 0.047504 |
| 6.128703 | 1.279742 | 0.755446 | 42.3249  | 42.20598 | 16.16511 | 0.135143 | 0.048087 |
| 6.18999  | 1.282568 | 0.757041 | 42.82751 | 42.29768 | 16.20155 | 0.135445 | 0.048672 |
| 6.251277 | 1.285334 | 0.758602 | 43.33014 | 42.38741 | 16.23721 | 0.135741 | 0.049256 |
| 6.312564 | 1.288041 | 0.76013  | 43.83277 | 42.47522 | 16.27211 | 0.13603  | 0.049841 |
| 6.373851 | 1.29069  | 0.761625 | 44.33538 | 42.56115 | 16.30627 | 0.136312 | 0.050427 |
| 6.435138 | 1.293284 | 0.763089 | 44.83796 | 42.64526 | 16.3397  | 0.136589 | 0.051012 |
| 6.496425 | 1.295823 | 0.764522 | 45.34049 | 42.7276  | 16.37243 | 0.13686  | 0.051598 |
| 6.557712 | 1.29831  | 0.765926 | 45.84296 | 42.80822 | 16.40448 | 0.137125 | 0.052184 |
| 6.618999 | 1.300746 | 0.767301 | 46.34535 | 42.88715 | 16.43587 | 0.137385 | 0.05277  |
| 6.680286 | 1.303131 | 0.768647 | 46.84765 | 42.96445 | 16.46661 | 0.137639 | 0.053357 |
| 6.741573 | 1.305468 | 0.769966 | 47.34983 | 43.04017 | 16.49672 | 0.137888 | 0.053944 |
| 6.80286  | 1.307757 | 0.771258 | 47.8519  | 43.11433 | 16.52621 | 0.138131 | 0.054531 |
| 6.864147 | 1.310001 | 0.772524 | 48.35383 | 43.187   | 16.55511 | 0.13837  | 0.055118 |
| 6.925434 | 1.312199 | 0.773766 | 48.85561 | 43.2582  | 16.58343 | 0.138604 | 0.055705 |
| 6.986721 | 1.314354 | 0.774982 | 49.35723 | 43.32798 | 16.61118 | 0.138834 | 0.056292 |
| 7.048008 | 1.316467 | 0.776175 | 49.85867 | 43.39637 | 16.63839 | 0.139058 | 0.05688  |
| 7.109295 | 1.318538 | 0.777344 | 50.35993 | 43.46342 | 16.66506 | 0.139279 | 0.057467 |
| 7.170582 | 1.320569 | 0.778491 | 50.86098 | 43.52917 | 16.69121 | 0.139495 | 0.058055 |
| 7.231869 | 1.322562 | 0.779616 | 51.36182 | 43.59364 | 16.71685 | 0.139706 | 0.058643 |
| 7.293156 | 1.324516 | 0.780719 | 51.86244 | 43.65688 | 16.74201 | 0.139914 | 0.059231 |
| 7.354443 | 1.326433 | 0.781802 | 52.36284 | 43.7189  | 16.76668 | 0.140117 | 0.059819 |
| 7.41573  | 1.328314 | 0.782864 | 52.86298 | 43.77975 | 16.79088 | 0.140317 | 0.060406 |
| 7.477017 | 1.33016  | 0.783907 | 53.36288 | 43.83946 | 16.81464 | 0.140513 | 0.060994 |
| 7.538304 | 1.331971 | 0.78493  | 53.86251 | 43.89806 | 16.83795 | 0.140705 | 0.061582 |
| 7.599591 | 1.33375  | 0.785935 | 54.36187 | 43.95558 | 16.86083 | 0.140894 | 0.06217  |
| 7.660878 | 1.335497 | 0.786922 | 54.86095 | 44.01206 | 16.88329 | 0.141079 | 0.062758 |
| 7.722165 | 1.337212 | 0.787891 | 55.35973 | 44.06752 | 16.90535 | 0.141261 | 0.063346 |
| 7.783453 | 1.338897 | 0.788843 | 55.85821 | 44.12199 | 16.92701 | 0.14144  | 0.063934 |
| 7.84474  | 1.340552 | 0.789779 | 56.35638 | 44.17551 | 16.9483  | 0.141615 | 0.064522 |
| 7.906027 | 1.342178 | 0.790698 | 56.85424 | 44.22807 | 16.9692  | 0.141787 | 0.06511  |
| 7.967314 | 1.343775 | 0.791602 | 57.35177 | 44.27972 | 16.98974 | 0.141957 | 0.065698 |
| 8.028601 | 1.345346 | 0.79249  | 57.84897 | 44.33047 | 17.00992 | 0.142123 | 0.066286 |
| 8.089888 | 1.34689  | 0.793363 | 58.34583 | 44.38037 | 17.02976 | 0.142286 | 0.066873 |
| 8.151175 | 1.348408 | 0.794221 | 58.84234 | 44.42942 | 17.04926 | 0.142447 | 0.067461 |
| 8.212462 | 1.3499   | 0.795066 | 59.33849 | 44.47766 | 17.06844 | 0.142605 | 0.068049 |
| 8.273749 | 1.351369 | 0.795897 | 59.83428 | 44.52511 | 17.0873  | 0.14276  | 0.068636 |
| 8.335036 | 1.352813 | 0.796714 | 60.3297  | 44.57178 | 17.10585 | 0.142913 | 0.069223 |
| 8.396323 | 1.354234 | 0.797518 | 60.82475 | 44.6177  | 17.12411 | 0.143063 | 0.069811 |
| 8.45761  | 1.355633 | 0.79831  | 61.31942 | 44.66288 | 17.14206 | 0.143211 | 0.070398 |
| 8.518897 | 1.357009 | 0.799089 | 61.8137  | 44.70735 | 17.15974 | 0.143356 | 0.070985 |

|          |          |          |          |          |          |          |          |
|----------|----------|----------|----------|----------|----------|----------|----------|
| 8.580184 | 1.358364 | 0.799857 | 62.30759 | 44.75112 | 17.17713 | 0.143499 | 0.071571 |
| 8.641471 | 1.359698 | 0.800612 | 62.80107 | 44.79422 | 17.19425 | 0.14364  | 0.072158 |
| 8.702758 | 1.361012 | 0.801357 | 63.29416 | 44.83666 | 17.21112 | 0.143779 | 0.072745 |
| 8.764045 | 1.362306 | 0.80209  | 63.78683 | 44.87846 | 17.22772 | 0.143915 | 0.073331 |
| 8.825332 | 1.363581 | 0.802812 | 64.2791  | 44.91963 | 17.24408 | 0.14405  | 0.073917 |
| 8.886619 | 1.364837 | 0.803524 | 64.77094 | 44.9602  | 17.26019 | 0.144182 | 0.074503 |
| 8.947906 | 1.366075 | 0.804226 | 65.26235 | 45.00017 | 17.27607 | 0.144313 | 0.075089 |
| 9.009193 | 1.367295 | 0.804917 | 65.75334 | 45.03957 | 17.29172 | 0.144441 | 0.075675 |
| 9.07048  | 1.368498 | 0.805599 | 66.2439  | 45.07841 | 17.30714 | 0.144568 | 0.076261 |
| 9.131767 | 1.369684 | 0.806272 | 66.73402 | 45.1167  | 17.32235 | 0.144693 | 0.076846 |
| 9.193054 | 1.370854 | 0.806935 | 67.22369 | 45.15446 | 17.33734 | 0.144816 | 0.077431 |
| 9.254341 | 1.372007 | 0.80759  | 67.71292 | 45.1917  | 17.35213 | 0.144938 | 0.078016 |
| 9.315628 | 1.373145 | 0.808235 | 68.20171 | 45.22844 | 17.36671 | 0.145057 | 0.078601 |
| 9.376915 | 1.374268 | 0.808873 | 68.69003 | 45.26469 | 17.3811  | 0.145175 | 0.079185 |
| 9.438202 | 1.375376 | 0.809502 | 69.1779  | 45.30046 | 17.3953  | 0.145292 | 0.07977  |
| 9.499489 | 1.37647  | 0.810123 | 69.66531 | 45.33576 | 17.40931 | 0.145407 | 0.080354 |
| 9.560776 | 1.37755  | 0.810736 | 70.15226 | 45.37061 | 17.42314 | 0.145521 | 0.080938 |
| 9.622063 | 1.378616 | 0.811341 | 70.63874 | 45.40502 | 17.4368  | 0.145633 | 0.081522 |
| 9.68335  | 1.379668 | 0.811939 | 71.12474 | 45.439   | 17.45028 | 0.145743 | 0.082105 |
| 9.744637 | 1.380708 | 0.81253  | 71.61028 | 45.47256 | 17.46359 | 0.145853 | 0.082688 |
| 9.805924 | 1.381736 | 0.813114 | 72.09533 | 45.50571 | 17.47674 | 0.145961 | 0.083271 |
| 9.867211 | 1.382751 | 0.81369  | 72.57991 | 45.53847 | 17.48974 | 0.146067 | 0.083854 |
| 9.928498 | 1.383754 | 0.814261 | 73.064   | 45.57084 | 17.50258 | 0.146173 | 0.084436 |
| 9.989785 | 1.384745 | 0.814824 | 73.54761 | 45.60283 | 17.51527 | 0.146277 | 0.085019 |
| 10.05107 | 1.385725 | 0.815381 | 74.03074 | 45.63445 | 17.5278  | 0.14638  | 0.085601 |
| 10.11236 | 1.386694 | 0.815932 | 74.51337 | 45.66571 | 17.5402  | 0.146481 | 0.086182 |
| 10.17365 | 1.387652 | 0.816477 | 74.99551 | 45.69661 | 17.55245 | 0.146582 | 0.086764 |
| 10.23493 | 1.388599 | 0.817016 | 75.47716 | 45.72718 | 17.56457 | 0.146681 | 0.087345 |
| 10.29622 | 1.389537 | 0.817549 | 75.95831 | 45.75741 | 17.57656 | 0.146779 | 0.087926 |
| 10.35751 | 1.390464 | 0.818077 | 76.43896 | 45.78732 | 17.58841 | 0.146877 | 0.088507 |
| 10.41879 | 1.391381 | 0.818599 | 76.91911 | 45.81691 | 17.60014 | 0.146973 | 0.089087 |
| 10.48008 | 1.392289 | 0.819116 | 77.39875 | 45.8462  | 17.61175 | 0.147068 | 0.089667 |
| 10.54137 | 1.393188 | 0.819628 | 77.87789 | 45.8752  | 17.62324 | 0.147162 | 0.090247 |
| 10.60266 | 1.394078 | 0.820135 | 78.35652 | 45.9039  | 17.63462 | 0.147255 | 0.090827 |
| 10.66394 | 1.394959 | 0.820636 | 78.83464 | 45.93233 | 17.64588 | 0.147348 | 0.091406 |
| 10.72523 | 1.395832 | 0.821134 | 79.31225 | 45.96048 | 17.65703 | 0.147439 | 0.091985 |
| 10.78652 | 1.396697 | 0.821626 | 79.78934 | 45.98837 | 17.66808 | 0.14753  | 0.092563 |
| 10.8478  | 1.397554 | 0.822115 | 80.26592 | 46.01602 | 17.67903 | 0.147619 | 0.093142 |
| 10.90909 | 1.398402 | 0.822598 | 80.74198 | 46.04338 | 17.68986 | 0.147708 | 0.09372  |
| 10.97038 | 1.399242 | 0.823077 | 81.21754 | 46.07047 | 17.70059 | 0.147796 | 0.094298 |
| 11.03166 | 1.400075 | 0.823552 | 81.69258 | 46.09732 | 17.71122 | 0.147883 | 0.094875 |
| 11.09295 | 1.4009   | 0.824022 | 82.1671  | 46.12392 | 17.72176 | 0.147969 | 0.095453 |
| 11.15424 | 1.401718 | 0.824489 | 82.64109 | 46.1503  | 17.7322  | 0.148055 | 0.09603  |
| 11.21553 | 1.402529 | 0.824951 | 83.11457 | 46.17645 | 17.74255 | 0.14814  | 0.096606 |
| 11.27681 | 1.403333 | 0.82541  | 83.58752 | 46.20238 | 17.75282 | 0.148224 | 0.097182 |
| 11.3381  | 1.40413  | 0.825865 | 84.05994 | 46.2281  | 17.763   | 0.148307 | 0.097758 |
| 11.39939 | 1.404922 | 0.826316 | 84.53184 | 46.25361 | 17.7731  | 0.14839  | 0.098334 |

|          |          |          |          |          |          |          |          |
|----------|----------|----------|----------|----------|----------|----------|----------|
| 11.46067 | 1.405707 | 0.826764 | 85.00321 | 46.27893 | 17.78312 | 0.148472 | 0.09891  |
| 11.52196 | 1.406486 | 0.827209 | 85.47404 | 46.30405 | 17.79306 | 0.148553 | 0.099485 |
| 11.58325 | 1.407259 | 0.827651 | 85.94435 | 46.32899 | 17.80293 | 0.148634 | 0.100059 |
| 11.64454 | 1.408027 | 0.828089 | 86.41412 | 46.35376 | 17.81272 | 0.148714 | 0.100634 |
| 11.70582 | 1.40879  | 0.828525 | 86.88335 | 46.37835 | 17.82245 | 0.148794 | 0.101208 |
| 11.76711 | 1.409547 | 0.828958 | 87.35205 | 46.40279 | 17.83211 | 0.148873 | 0.101782 |
| 11.8284  | 1.410298 | 0.829386 | 87.82023 | 46.42699 | 17.84168 | 0.148951 | 0.102355 |
| 11.88968 | 1.411043 | 0.829812 | 88.28789 | 46.45101 | 17.85119 | 0.149029 | 0.102928 |
| 11.95097 | 1.411783 | 0.830235 | 88.755   | 46.47487 | 17.86062 | 0.149106 | 0.103501 |
| 12.01226 | 1.412518 | 0.830655 | 89.22159 | 46.49857 | 17.86999 | 0.149183 | 0.104073 |
| 12.07354 | 1.413248 | 0.831072 | 89.68763 | 46.52211 | 17.8793  | 0.149259 | 0.104646 |
| 12.13483 | 1.413973 | 0.831487 | 90.15314 | 46.54549 | 17.88855 | 0.149334 | 0.105217 |
| 12.19612 | 1.414694 | 0.831899 | 90.61812 | 46.56873 | 17.89773 | 0.14941  | 0.105789 |
| 12.25741 | 1.415411 | 0.832308 | 91.08255 | 46.59183 | 17.90686 | 0.149484 | 0.10636  |
| 12.31869 | 1.416123 | 0.832715 | 91.54645 | 46.61478 | 17.91594 | 0.149558 | 0.106931 |
| 12.37998 | 1.41683  | 0.83312  | 92.0098  | 46.6376  | 17.92496 | 0.149632 | 0.107501 |
| 12.44127 | 1.417534 | 0.833523 | 92.47261 | 46.6603  | 17.93393 | 0.149706 | 0.108072 |
| 12.50255 | 1.418234 | 0.833923 | 92.93489 | 46.68286 | 17.94285 | 0.149778 | 0.108641 |
| 12.56384 | 1.418931 | 0.834322 | 93.39662 | 46.70531 | 17.95172 | 0.149851 | 0.109211 |
| 12.62513 | 1.419623 | 0.834718 | 93.8578  | 46.72765 | 17.96054 | 0.149923 | 0.10978  |
| 12.68641 | 1.420312 | 0.835112 | 94.31845 | 46.74986 | 17.96932 | 0.149995 | 0.110349 |
| 12.7477  | 1.420997 | 0.835504 | 94.77856 | 46.77191 | 17.97803 | 0.150066 | 0.110917 |
| 12.80899 | 1.421677 | 0.835893 | 95.23814 | 46.79385 | 17.9867  | 0.150137 | 0.111485 |
| 12.87028 | 1.422354 | 0.836281 | 95.69717 | 46.81567 | 17.99532 | 0.150207 | 0.112053 |
| 12.93156 | 1.423028 | 0.836666 | 96.15566 | 46.83738 | 18.0039  | 0.150277 | 0.112621 |
| 12.99285 | 1.423698 | 0.83705  | 96.61361 | 46.85899 | 18.01243 | 0.150347 | 0.113188 |
| 13.05414 | 1.424364 | 0.837432 | 97.07102 | 46.88048 | 18.02092 | 0.150416 | 0.113754 |
| 13.11542 | 1.425028 | 0.837812 | 97.52789 | 46.90187 | 18.02937 | 0.150485 | 0.114321 |
| 13.17671 | 1.425689 | 0.83819  | 97.98421 | 46.92316 | 18.03778 | 0.150554 | 0.114887 |
| 13.238   | 1.426346 | 0.838566 | 98.44    | 46.94435 | 18.04615 | 0.150622 | 0.115452 |
| 13.29928 | 1.427    | 0.838941 | 98.89524 | 46.96545 | 18.05448 | 0.15069  | 0.116018 |
| 13.36057 | 1.427652 | 0.839314 | 99.34993 | 46.98645 | 18.06277 | 0.150758 | 0.116583 |
| 13.42186 | 1.4283   | 0.839686 | 99.80409 | 47.00736 | 18.07103 | 0.150825 | 0.117147 |
| 13.48315 | 1.428946 | 0.840056 | 100.2577 | 47.02818 | 18.07925 | 0.150893 | 0.117712 |
| 13.54443 | 1.429589 | 0.840424 | 100.7108 | 47.04891 | 18.08743 | 0.150959 | 0.118276 |
| 13.60572 | 1.430229 | 0.840791 | 101.1633 | 47.06955 | 18.09558 | 0.151026 | 0.118839 |
| 13.66701 | 1.430867 | 0.841156 | 101.6153 | 47.09009 | 18.10369 | 0.151092 | 0.119402 |
| 13.72829 | 1.431501 | 0.84152  | 102.0667 | 47.11056 | 18.11177 | 0.151158 | 0.119965 |
| 13.78958 | 1.432134 | 0.841882 | 102.5176 | 47.13094 | 18.11981 | 0.151224 | 0.120528 |
| 13.85087 | 1.432763 | 0.842243 | 102.968  | 47.15123 | 18.12782 | 0.151289 | 0.12109  |
| 13.91216 | 1.43339  | 0.842603 | 103.4178 | 47.17145 | 18.1358  | 0.151354 | 0.121652 |
| 13.97344 | 1.434015 | 0.842961 | 103.8671 | 47.19159 | 18.14375 | 0.151419 | 0.122213 |
| 14.03473 | 1.434637 | 0.843318 | 104.3159 | 47.21165 | 18.15166 | 0.151484 | 0.122774 |
| 14.09602 | 1.435257 | 0.843673 | 104.7641 | 47.23163 | 18.15955 | 0.151548 | 0.123335 |
| 14.1573  | 1.435875 | 0.844027 | 105.2117 | 47.25154 | 18.1674  | 0.151612 | 0.123896 |
| 14.21859 | 1.43649  | 0.84438  | 105.6589 | 47.27138 | 18.17523 | 0.151676 | 0.124456 |
| 14.27988 | 1.437103 | 0.844732 | 106.1054 | 47.29114 | 18.18303 | 0.15174  | 0.125015 |

|          |          |          |          |          |          |          |          |
|----------|----------|----------|----------|----------|----------|----------|----------|
| 14.34116 | 1.437714 | 0.845082 | 106.5515 | 47.31084 | 18.19079 | 0.151804 | 0.125575 |
| 14.40245 | 1.438323 | 0.845431 | 106.997  | 47.33046 | 18.19853 | 0.151867 | 0.126134 |
| 14.46374 | 1.438929 | 0.845779 | 107.442  | 47.35001 | 18.20625 | 0.15193  | 0.126692 |
| 14.52503 | 1.439534 | 0.846126 | 107.8864 | 47.3695  | 18.21394 | 0.151993 | 0.12725  |
| 14.58631 | 1.440136 | 0.846472 | 108.3303 | 47.38892 | 18.2216  | 0.152055 | 0.127808 |
| 14.6476  | 1.440737 | 0.846816 | 108.7736 | 47.40828 | 18.22923 | 0.152117 | 0.128366 |
| 14.70889 | 1.441335 | 0.84716  | 109.2164 | 47.42758 | 18.23684 | 0.15218  | 0.128923 |
| 14.77017 | 1.441932 | 0.847502 | 109.6587 | 47.44681 | 18.24443 | 0.152241 | 0.12948  |
| 14.83146 | 1.442526 | 0.847843 | 110.1005 | 47.46598 | 18.25199 | 0.152303 | 0.130036 |
| 14.89275 | 1.443119 | 0.848184 | 110.5417 | 47.48509 | 18.25952 | 0.152365 | 0.130592 |
| 14.95403 | 1.44371  | 0.848523 | 110.9823 | 47.50414 | 18.26704 | 0.152426 | 0.131148 |
| 15.01532 | 1.444299 | 0.848861 | 111.4225 | 47.52313 | 18.27453 | 0.152487 | 0.131704 |
| 15.07661 | 1.444887 | 0.849198 | 111.8621 | 47.54207 | 18.28199 | 0.152548 | 0.132259 |
| 15.1379  | 1.445472 | 0.849534 | 112.3011 | 47.56094 | 18.28944 | 0.152609 | 0.132813 |
| 15.19918 | 1.446056 | 0.84987  | 112.7396 | 47.57977 | 18.29686 | 0.15267  | 0.133367 |
| 15.26047 | 1.446639 | 0.850204 | 113.1776 | 47.59854 | 18.30427 | 0.15273  | 0.133921 |
| 15.32176 | 1.447219 | 0.850537 | 113.6151 | 47.61726 | 18.31165 | 0.15279  | 0.134475 |
| 15.38304 | 1.447799 | 0.85087  | 114.052  | 47.63592 | 18.31901 | 0.15285  | 0.135028 |
| 15.44433 | 1.448376 | 0.851201 | 114.4884 | 47.65453 | 18.32635 | 0.15291  | 0.135581 |
| 15.50562 | 1.448952 | 0.851532 | 114.9243 | 47.67309 | 18.33367 | 0.15297  | 0.136133 |
| 15.56691 | 1.449526 | 0.851861 | 115.3596 | 47.6916  | 18.34096 | 0.15303  | 0.136686 |
| 15.62819 | 1.450099 | 0.85219  | 115.7944 | 47.71006 | 18.34824 | 0.153089 | 0.137237 |
| 15.68948 | 1.45067  | 0.852518 | 116.2286 | 47.72847 | 18.3555  | 0.153148 | 0.137789 |
| 15.75077 | 1.45124  | 0.852845 | 116.6624 | 47.74683 | 18.36275 | 0.153207 | 0.13834  |
| 15.81205 | 1.451808 | 0.853171 | 117.0956 | 47.76514 | 18.36997 | 0.153266 | 0.13889  |
| 15.87334 | 1.452375 | 0.853497 | 117.5282 | 47.78342 | 18.37717 | 0.153325 | 0.139441 |
| 15.93463 | 1.452941 | 0.853822 | 117.9604 | 47.80164 | 18.38436 | 0.153384 | 0.139991 |
| 15.99591 | 1.453505 | 0.854146 | 118.392  | 47.81982 | 18.39153 | 0.153442 | 0.14054  |
| 16.0572  | 1.454068 | 0.854469 | 118.823  | 47.83796 | 18.39869 | 0.153501 | 0.141089 |
| 16.11849 | 1.45463  | 0.854791 | 119.2536 | 47.85606 | 18.40582 | 0.153559 | 0.141638 |
| 16.17978 | 1.45519  | 0.855113 | 119.6836 | 47.87412 | 18.41295 | 0.153617 | 0.142187 |
| 16.24106 | 1.45575  | 0.855434 | 120.1131 | 47.89214 | 18.42005 | 0.153675 | 0.142735 |
| 16.30235 | 1.456308 | 0.855755 | 120.5421 | 47.91011 | 18.42714 | 0.153733 | 0.143283 |
| 16.36364 | 1.456864 | 0.856074 | 120.9705 | 47.92804 | 18.43421 | 0.15379  | 0.14383  |
| 16.42492 | 1.457419 | 0.856393 | 121.3984 | 47.94593 | 18.44127 | 0.153848 | 0.144377 |
| 16.48621 | 1.457974 | 0.856711 | 121.8258 | 47.96378 | 18.44831 | 0.153905 | 0.144924 |
| 16.5475  | 1.458526 | 0.857028 | 122.2526 | 47.98159 | 18.45533 | 0.153963 | 0.14547  |
| 16.60878 | 1.459078 | 0.857345 | 122.679  | 47.99936 | 18.46234 | 0.15402  | 0.146016 |
| 16.67007 | 1.459629 | 0.857661 | 123.1048 | 48.01709 | 18.46934 | 0.154077 | 0.146561 |
| 16.73136 | 1.460178 | 0.857977 | 123.5301 | 48.03479 | 18.47632 | 0.154134 | 0.147107 |
| 16.79265 | 1.460726 | 0.858292 | 123.9548 | 48.05245 | 18.48328 | 0.154191 | 0.147651 |
| 16.85393 | 1.461274 | 0.858606 | 124.3791 | 48.07008 | 18.49023 | 0.154247 | 0.148196 |
| 16.91522 | 1.46182  | 0.858919 | 124.8028 | 48.08767 | 18.49717 | 0.154304 | 0.14874  |
| 16.97651 | 1.462365 | 0.859232 | 125.226  | 48.10522 | 18.5041  | 0.15436  | 0.149284 |
| 17.03779 | 1.462909 | 0.859545 | 125.6486 | 48.12275 | 18.51101 | 0.154417 | 0.149827 |
| 17.09908 | 1.463452 | 0.859856 | 126.0708 | 48.14023 | 18.51791 | 0.154473 | 0.15037  |
| 17.16037 | 1.463994 | 0.860168 | 126.4924 | 48.15769 | 18.52479 | 0.154529 | 0.150913 |

|          |          |          |          |          |          |          |          |
|----------|----------|----------|----------|----------|----------|----------|----------|
| 17.22165 | 1.464535 | 0.860478 | 126.9135 | 48.17511 | 18.53166 | 0.154585 | 0.151455 |
| 17.28294 | 1.465074 | 0.860788 | 127.3341 | 48.1925  | 18.53852 | 0.154641 | 0.151997 |
| 17.34423 | 1.465613 | 0.861098 | 127.7542 | 48.20985 | 18.54536 | 0.154697 | 0.152538 |
| 17.40552 | 1.466151 | 0.861406 | 128.1737 | 48.22717 | 18.55219 | 0.154752 | 0.15308  |
| 17.4668  | 1.466688 | 0.861715 | 128.5928 | 48.24446 | 18.55901 | 0.154808 | 0.15362  |
| 17.52809 | 1.467224 | 0.862022 | 129.0113 | 48.26171 | 18.56582 | 0.154863 | 0.154161 |
| 17.58938 | 1.467758 | 0.862329 | 129.4293 | 48.27894 | 18.57261 | 0.154919 | 0.154701 |
| 17.65066 | 1.468292 | 0.862636 | 129.8468 | 48.29613 | 18.57939 | 0.154974 | 0.155241 |
| 17.71195 | 1.468825 | 0.862942 | 130.2637 | 48.3133  | 18.58616 | 0.155029 | 0.15578  |
| 17.77324 | 1.469357 | 0.863248 | 130.6802 | 48.33043 | 18.59292 | 0.155084 | 0.156319 |
| 17.83453 | 1.469888 | 0.863552 | 131.0961 | 48.34753 | 18.59966 | 0.155139 | 0.156857 |
| 17.89581 | 1.470418 | 0.863857 | 131.5115 | 48.3646  | 18.60639 | 0.155194 | 0.157396 |
| 17.9571  | 1.470947 | 0.864161 | 131.9265 | 48.38164 | 18.61311 | 0.155249 | 0.157934 |
| 18.01839 | 1.471476 | 0.864464 | 132.3408 | 48.39866 | 18.61982 | 0.155304 | 0.158471 |
| 18.07967 | 1.472003 | 0.864767 | 132.7547 | 48.41564 | 18.62652 | 0.155358 | 0.159008 |
| 18.14096 | 1.472529 | 0.865069 | 133.1681 | 48.43259 | 18.63321 | 0.155413 | 0.159545 |
| 18.20225 | 1.473055 | 0.865371 | 133.581  | 48.44952 | 18.63988 | 0.155467 | 0.160081 |
| 18.26353 | 1.473579 | 0.865673 | 133.9933 | 48.46642 | 18.64654 | 0.155522 | 0.160617 |
| 18.32482 | 1.474103 | 0.865973 | 134.4052 | 48.48329 | 18.6532  | 0.155576 | 0.161153 |
| 18.38611 | 1.474626 | 0.866274 | 134.8165 | 48.50013 | 18.65984 | 0.15563  | 0.161688 |
| 18.4474  | 1.475148 | 0.866574 | 135.2273 | 48.51694 | 18.66647 | 0.155684 | 0.162223 |
| 18.50868 | 1.475669 | 0.866873 | 135.6376 | 48.53373 | 18.67309 | 0.155738 | 0.162758 |
| 18.56997 | 1.47619  | 0.867172 | 136.0474 | 48.55049 | 18.6797  | 0.155792 | 0.163292 |
| 18.63126 | 1.476709 | 0.86747  | 136.4567 | 48.56722 | 18.68629 | 0.155846 | 0.163826 |
| 18.69254 | 1.477228 | 0.867768 | 136.8655 | 48.58392 | 18.69288 | 0.155899 | 0.16436  |
| 18.75383 | 1.477745 | 0.868066 | 137.2738 | 48.60059 | 18.69945 | 0.155953 | 0.164893 |
| 18.81512 | 1.478262 | 0.868362 | 137.6816 | 48.61724 | 18.70602 | 0.156006 | 0.165425 |
| 18.8764  | 1.478779 | 0.868659 | 138.0888 | 48.63386 | 18.71257 | 0.15606  | 0.165958 |
| 18.93769 | 1.479294 | 0.868955 | 138.4956 | 48.65046 | 18.71912 | 0.156113 | 0.16649  |
| 18.99898 | 1.479808 | 0.86925  | 138.9019 | 48.66703 | 18.72565 | 0.156166 | 0.167022 |
| 19.06027 | 1.480322 | 0.869546 | 139.3076 | 48.68357 | 18.73218 | 0.15622  | 0.167553 |
| 19.12155 | 1.480835 | 0.86984  | 139.7129 | 48.70009 | 18.73869 | 0.156273 | 0.168084 |
| 19.18284 | 1.481347 | 0.870134 | 140.1177 | 48.71658 | 18.74519 | 0.156326 | 0.168614 |
| 19.24413 | 1.481858 | 0.870428 | 140.5219 | 48.73304 | 18.75169 | 0.156379 | 0.169145 |
| 19.30541 | 1.482369 | 0.870721 | 140.9257 | 48.74948 | 18.75817 | 0.156431 | 0.169674 |
| 19.3667  | 1.482879 | 0.871014 | 141.3289 | 48.7659  | 18.76464 | 0.156484 | 0.170204 |
| 19.42799 | 1.483388 | 0.871306 | 141.7317 | 48.78229 | 18.77111 | 0.156537 | 0.170733 |
| 19.48927 | 1.483896 | 0.871598 | 142.1339 | 48.79866 | 18.77756 | 0.15659  | 0.171262 |
| 19.55056 | 1.484403 | 0.87189  | 142.5357 | 48.815   | 18.78401 | 0.156642 | 0.17179  |
| 19.61185 | 1.48491  | 0.872181 | 142.937  | 48.83131 | 18.79044 | 0.156694 | 0.172318 |
| 19.67314 | 1.485416 | 0.872472 | 143.3377 | 48.8476  | 18.79687 | 0.156747 | 0.172846 |
| 19.73442 | 1.485921 | 0.872762 | 143.738  | 48.86387 | 18.80328 | 0.156799 | 0.173373 |
| 19.79571 | 1.486426 | 0.873051 | 144.1378 | 48.88011 | 18.80969 | 0.156851 | 0.1739   |
| 19.857   | 1.48693  | 0.873341 | 144.537  | 48.89633 | 18.81609 | 0.156903 | 0.174427 |
| 19.91828 | 1.487433 | 0.87363  | 144.9358 | 48.91253 | 18.82248 | 0.156955 | 0.174953 |
| 19.97957 | 1.487935 | 0.873918 | 145.3341 | 48.9287  | 18.82885 | 0.157007 | 0.175479 |
| 20.04086 | 1.488437 | 0.874206 | 145.7319 | 48.94484 | 18.83522 | 0.157059 | 0.176004 |

|          |          |          |          |          |          |          |          |
|----------|----------|----------|----------|----------|----------|----------|----------|
| 20.10215 | 1.488938 | 0.874494 | 146.1292 | 48.96097 | 18.84158 | 0.157111 | 0.176529 |
| 20.16343 | 1.489438 | 0.874781 | 146.526  | 48.97707 | 18.84793 | 0.157163 | 0.177054 |
| 20.22472 | 1.489937 | 0.875068 | 146.9223 | 48.99315 | 18.85428 | 0.157215 | 0.177578 |
| 20.28601 | 1.490436 | 0.875354 | 147.3181 | 49.0092  | 18.86061 | 0.157266 | 0.178102 |
| 20.34729 | 1.490934 | 0.87564  | 147.7134 | 49.02523 | 18.86693 | 0.157318 | 0.178626 |
| 20.40858 | 1.491431 | 0.875926 | 148.1083 | 49.04124 | 18.87325 | 0.157369 | 0.179149 |
| 20.46987 | 1.491928 | 0.876211 | 148.5026 | 49.05723 | 18.87956 | 0.157421 | 0.179672 |
| 20.53115 | 1.492424 | 0.876496 | 148.8965 | 49.07319 | 18.88585 | 0.157472 | 0.180195 |
| 20.59244 | 1.492919 | 0.87678  | 149.2898 | 49.08913 | 18.89214 | 0.157523 | 0.180717 |
| 20.65373 | 1.493414 | 0.877064 | 149.6827 | 49.10505 | 18.89842 | 0.157574 | 0.181239 |
| 20.71502 | 1.493908 | 0.877348 | 150.0751 | 49.12095 | 18.9047  | 0.157625 | 0.181761 |
| 20.7763  | 1.494401 | 0.877631 | 150.467  | 49.13682 | 18.91096 | 0.157676 | 0.182282 |
| 20.83759 | 1.494893 | 0.877914 | 150.8585 | 49.15268 | 18.91721 | 0.157727 | 0.182802 |
| 20.89888 | 1.495385 | 0.878196 | 151.2494 | 49.16851 | 18.92346 | 0.157778 | 0.183323 |
| 20.96016 | 1.495876 | 0.878478 | 151.6398 | 49.18432 | 18.9297  | 0.157829 | 0.183843 |
| 21.02145 | 1.496367 | 0.87876  | 152.0298 | 49.2001  | 18.93593 | 0.15788  | 0.184362 |
| 21.08274 | 1.496857 | 0.879041 | 152.4193 | 49.21587 | 18.94215 | 0.15793  | 0.184882 |
| 21.14402 | 1.497346 | 0.879322 | 152.8083 | 49.23161 | 18.94836 | 0.157981 | 0.185401 |
| 21.20531 | 1.497835 | 0.879603 | 153.1968 | 49.24734 | 18.95456 | 0.158031 | 0.185919 |
| 21.2666  | 1.498323 | 0.879883 | 153.5848 | 49.26304 | 18.96076 | 0.158082 | 0.186438 |
| 21.32789 | 1.49881  | 0.880163 | 153.9724 | 49.27872 | 18.96695 | 0.158132 | 0.186955 |
| 21.38917 | 1.499296 | 0.880442 | 154.3594 | 49.29438 | 18.97312 | 0.158183 | 0.187473 |
| 21.45046 | 1.499782 | 0.880721 | 154.746  | 49.31001 | 18.97929 | 0.158233 | 0.18799  |
| 21.51175 | 1.500268 | 0.881    | 155.1321 | 49.32563 | 18.98546 | 0.158283 | 0.188507 |
| 21.57303 | 1.500752 | 0.881278 | 155.5178 | 49.34123 | 18.99161 | 0.158333 | 0.189023 |
| 21.63432 | 1.501236 | 0.881556 | 155.9029 | 49.35681 | 18.99776 | 0.158383 | 0.189539 |
| 21.69561 | 1.50172  | 0.881833 | 156.2876 | 49.37236 | 19.00389 | 0.158433 | 0.190055 |
| 21.75689 | 1.502202 | 0.882111 | 156.6718 | 49.38789 | 19.01002 | 0.158483 | 0.19057  |
| 21.81818 | 1.502684 | 0.882387 | 157.0555 | 49.40341 | 19.01614 | 0.158533 | 0.191085 |
| 21.87947 | 1.503166 | 0.882664 | 157.4387 | 49.4189  | 19.02226 | 0.158583 | 0.1916   |
| 21.94076 | 1.503647 | 0.88294  | 157.8215 | 49.43437 | 19.02836 | 0.158632 | 0.192114 |
| 22.00204 | 1.504127 | 0.883216 | 158.2038 | 49.44982 | 19.03446 | 0.158682 | 0.192628 |
| 22.06333 | 1.504606 | 0.883491 | 158.5856 | 49.46526 | 19.04055 | 0.158732 | 0.193142 |
| 22.12462 | 1.505085 | 0.883766 | 158.9669 | 49.48067 | 19.04663 | 0.158781 | 0.193655 |
| 22.1859  | 1.505563 | 0.88404  | 159.3478 | 49.49606 | 19.0527  | 0.158831 | 0.194168 |
| 22.24719 | 1.506041 | 0.884315 | 159.7282 | 49.51143 | 19.05877 | 0.15888  | 0.19468  |
| 22.30848 | 1.506518 | 0.884589 | 160.1081 | 49.52678 | 19.06483 | 0.158929 | 0.195192 |
| 22.36977 | 1.506995 | 0.884862 | 160.4876 | 49.54211 | 19.07087 | 0.158979 | 0.195704 |
| 22.43105 | 1.50747  | 0.885135 | 160.8665 | 49.55742 | 19.07692 | 0.159028 | 0.196215 |
| 22.49234 | 1.507945 | 0.885408 | 161.245  | 49.57271 | 19.08295 | 0.159077 | 0.196726 |
| 22.55363 | 1.50842  | 0.885681 | 161.6231 | 49.58798 | 19.08898 | 0.159126 | 0.197237 |
| 22.61491 | 1.508894 | 0.885953 | 162.0006 | 49.60323 | 19.09499 | 0.159175 | 0.197747 |
| 22.6762  | 1.509367 | 0.886225 | 162.3777 | 49.61846 | 19.101   | 0.159224 | 0.198257 |
| 22.73749 | 1.50984  | 0.886496 | 162.7544 | 49.63368 | 19.10701 | 0.159273 | 0.198767 |
| 22.79877 | 1.510312 | 0.886767 | 163.1305 | 49.64887 | 19.113   | 0.159322 | 0.199276 |
| 22.86006 | 1.510784 | 0.887038 | 163.5062 | 49.66404 | 19.11899 | 0.15937  | 0.199785 |
| 22.92135 | 1.511255 | 0.887308 | 163.8814 | 49.6792  | 19.12497 | 0.159419 | 0.200293 |



|          |          |          |          |          |          |          |          |
|----------|----------|----------|----------|----------|----------|----------|----------|
| 22.98264 | 1.511725 | 0.887578 | 164.2562 | 49.69433 | 19.13094 | 0.159468 | 0.200802 |
| 23.04392 | 1.512195 | 0.887848 | 164.6305 | 49.70945 | 19.13691 | 0.159516 | 0.201309 |
| 23.10521 | 1.512664 | 0.888117 | 165.0043 | 49.72455 | 19.14287 | 0.159565 | 0.201817 |
| 23.1665  | 1.513133 | 0.888386 | 165.3777 | 49.73962 | 19.14882 | 0.159613 | 0.202324 |
| 23.22778 | 1.513601 | 0.888655 | 165.7506 | 49.75468 | 19.15476 | 0.159662 | 0.202831 |
| 23.28907 | 1.514068 | 0.888923 | 166.123  | 49.76972 | 19.16069 | 0.15971  | 0.203337 |
| 23.35036 | 1.514535 | 0.889191 | 166.495  | 49.78474 | 19.16662 | 0.159758 | 0.203843 |
| 23.41164 | 1.515001 | 0.889459 | 166.8665 | 49.79974 | 19.17254 | 0.159806 | 0.204349 |
| 23.47293 | 1.515467 | 0.889726 | 167.2376 | 49.81472 | 19.17845 | 0.159855 | 0.204854 |
| 23.53422 | 1.515932 | 0.889993 | 167.6081 | 49.82968 | 19.18436 | 0.159903 | 0.205359 |
| 23.59551 | 1.516396 | 0.89026  | 167.9783 | 49.84462 | 19.19025 | 0.159951 | 0.205863 |
| 23.65679 | 1.51686  | 0.890526 | 168.3479 | 49.85955 | 19.19614 | 0.159999 | 0.206368 |
| 23.71808 | 1.517323 | 0.890792 | 168.7171 | 49.87445 | 19.20202 | 0.160046 | 0.206872 |
| 23.77937 | 1.517786 | 0.891058 | 169.0859 | 49.88933 | 19.2079  | 0.160094 | 0.207375 |
| 23.84065 | 1.518248 | 0.891323 | 169.4542 | 49.9042  | 19.21377 | 0.160142 | 0.207878 |
| 23.90194 | 1.518709 | 0.891588 | 169.822  | 49.91904 | 19.21963 | 0.16019  | 0.208381 |
| 23.96323 | 1.51917  | 0.891852 | 170.1894 | 49.93387 | 19.22548 | 0.160237 | 0.208883 |
| 24.02451 | 1.51963  | 0.892117 | 170.5563 | 49.94868 | 19.23132 | 0.160285 | 0.209385 |
| 24.0858  | 1.52009  | 0.89238  | 170.9228 | 49.96346 | 19.23716 | 0.160332 | 0.209887 |
| 24.14709 | 1.520549 | 0.892644 | 171.2888 | 49.97823 | 19.24299 | 0.16038  | 0.210389 |
| 24.20838 | 1.521008 | 0.892907 | 171.6544 | 49.99298 | 19.24881 | 0.160427 | 0.21089  |
| 24.26966 | 1.521465 | 0.89317  | 172.0195 | 50.00771 | 19.25462 | 0.160475 | 0.21139  |
| 24.33095 | 1.521923 | 0.893432 | 172.3841 | 50.02241 | 19.26043 | 0.160522 | 0.211891 |
| 24.39224 | 1.522379 | 0.893694 | 172.7483 | 50.0371  | 19.26623 | 0.160569 | 0.212391 |
| 24.45352 | 1.522836 | 0.893956 | 173.112  | 50.05178 | 19.27202 | 0.160616 | 0.21289  |
| 24.51481 | 1.523291 | 0.894218 | 173.4753 | 50.06644 | 19.27781 | 0.160663 | 0.213389 |
| 24.5761  | 1.523747 | 0.894479 | 173.8382 | 50.08108 | 19.28359 | 0.16071  | 0.213888 |
| 24.63739 | 1.524201 | 0.89474  | 174.2006 | 50.0957  | 19.28936 | 0.160757 | 0.214387 |
| 24.69867 | 1.524655 | 0.895001 | 174.5625 | 50.11031 | 19.29513 | 0.160804 | 0.214885 |
| 24.75996 | 1.525109 | 0.895261 | 174.924  | 50.1249  | 19.30089 | 0.160851 | 0.215383 |
| 24.82125 | 1.525562 | 0.895521 | 175.285  | 50.13947 | 19.30664 | 0.160898 | 0.21588  |
| 24.88253 | 1.526014 | 0.895781 | 175.6456 | 50.15402 | 19.31238 | 0.160945 | 0.216377 |
| 24.94382 | 1.526466 | 0.89604  | 176.0057 | 50.16855 | 19.31812 | 0.160991 | 0.216874 |
| 25.00511 | 1.526917 | 0.896299 | 176.3654 | 50.18306 | 19.32385 | 0.161038 | 0.21737  |
| 25.06639 | 1.527368 | 0.896558 | 176.7247 | 50.19756 | 19.32957 | 0.161085 | 0.217866 |
| 25.12768 | 1.527818 | 0.896816 | 177.0835 | 50.21204 | 19.33529 | 0.161131 | 0.218362 |
| 25.18897 | 1.528267 | 0.897074 | 177.4418 | 50.2265  | 19.34099 | 0.161178 | 0.218858 |
| 25.25026 | 1.528716 | 0.897332 | 177.7997 | 50.24094 | 19.34669 | 0.161224 | 0.219353 |
| 25.31154 | 1.529165 | 0.897589 | 178.1572 | 50.25536 | 19.35239 | 0.16127  | 0.219847 |
| 25.37283 | 1.529613 | 0.897846 | 178.5142 | 50.26976 | 19.35808 | 0.161317 | 0.220341 |
| 25.43412 | 1.53006  | 0.898103 | 178.8708 | 50.28414 | 19.36375 | 0.161363 | 0.220835 |
| 25.4954  | 1.530506 | 0.898359 | 179.2269 | 50.29851 | 19.36943 | 0.161409 | 0.221329 |
| 25.55669 | 1.530953 | 0.898615 | 179.5826 | 50.31286 | 19.37509 | 0.161455 | 0.221822 |
| 25.61798 | 1.531398 | 0.898871 | 179.9379 | 50.32719 | 19.38075 | 0.161501 | 0.222315 |
| 25.67926 | 1.531843 | 0.899126 | 180.2927 | 50.3415  | 19.3864  | 0.161547 | 0.222808 |
| 25.74055 | 1.532288 | 0.899381 | 180.647  | 50.35579 | 19.39204 | 0.161593 | 0.2233   |
| 25.80184 | 1.532732 | 0.899636 | 181.0009 | 50.37006 | 19.39768 | 0.161639 | 0.223792 |

|          |          |          |          |          |          |          |          |
|----------|----------|----------|----------|----------|----------|----------|----------|
| 25.86313 | 1.533175 | 0.89989  | 181.3544 | 50.38432 | 19.40331 | 0.161685 | 0.224283 |
| 25.92441 | 1.533618 | 0.900144 | 181.7075 | 50.39855 | 19.40893 | 0.16173  | 0.224774 |
| 25.9857  | 1.53406  | 0.900398 | 182.0601 | 50.41277 | 19.41455 | 0.161776 | 0.225265 |
| 26.04699 | 1.534501 | 0.900651 | 182.4123 | 50.42696 | 19.42015 | 0.161822 | 0.225755 |
| 26.10827 | 1.534942 | 0.900904 | 182.764  | 50.44114 | 19.42575 | 0.161867 | 0.226245 |
| 26.16956 | 1.535383 | 0.901157 | 183.1153 | 50.4553  | 19.43135 | 0.161913 | 0.226735 |
| 26.23085 | 1.535823 | 0.901409 | 183.4661 | 50.46944 | 19.43693 | 0.161958 | 0.227224 |
| 26.29213 | 1.536262 | 0.901661 | 183.8166 | 50.48356 | 19.44251 | 0.162004 | 0.227713 |
| 26.35342 | 1.536701 | 0.901913 | 184.1666 | 50.49768 | 19.44808 | 0.162049 | 0.228202 |
| 26.41471 | 1.537139 | 0.902164 | 184.5161 | 50.51177 | 19.45365 | 0.162094 | 0.22869  |
| 26.476   | 1.537577 | 0.902416 | 184.8652 | 50.52585 | 19.45921 | 0.162139 | 0.229178 |
| 26.53728 | 1.538014 | 0.902667 | 185.2139 | 50.53991 | 19.46476 | 0.162185 | 0.229666 |
| 26.59857 | 1.538451 | 0.902917 | 185.5622 | 50.55396 | 19.47031 | 0.16223  | 0.230153 |
| 26.65986 | 1.538887 | 0.903167 | 185.91   | 50.56798 | 19.47585 | 0.162275 | 0.23064  |
| 26.72114 | 1.539323 | 0.903417 | 186.2574 | 50.58199 | 19.48138 | 0.16232  | 0.231127 |
| 26.78243 | 1.539758 | 0.903667 | 186.6043 | 50.59598 | 19.48691 | 0.162365 | 0.231613 |
| 26.84372 | 1.540193 | 0.903916 | 186.9508 | 50.60995 | 19.49243 | 0.16241  | 0.232099 |
| 26.90501 | 1.540627 | 0.904165 | 187.2969 | 50.62391 | 19.49794 | 0.162455 | 0.232584 |
| 26.96629 | 1.54106  | 0.904414 | 187.6426 | 50.63784 | 19.50344 | 0.162499 | 0.233069 |
| 27.02758 | 1.541493 | 0.904662 | 187.9878 | 50.65176 | 19.50894 | 0.162544 | 0.233554 |
| 27.08887 | 1.541926 | 0.904911 | 188.3326 | 50.66566 | 19.51443 | 0.162589 | 0.234039 |
| 27.15015 | 1.542358 | 0.905158 | 188.677  | 50.67955 | 19.51992 | 0.162633 | 0.234523 |
| 27.21144 | 1.542789 | 0.905406 | 189.0209 | 50.69341 | 19.52539 | 0.162678 | 0.235006 |
| 27.27273 | 1.54322  | 0.905653 | 189.3644 | 50.70726 | 19.53086 | 0.162722 | 0.23549  |
| 27.33401 | 1.54365  | 0.9059   | 189.7075 | 50.72109 | 19.53633 | 0.162767 | 0.235973 |
| 27.3953  | 1.54408  | 0.906146 | 190.0502 | 50.73491 | 19.54178 | 0.162811 | 0.236456 |
| 27.45659 | 1.544509 | 0.906392 | 190.3924 | 50.7487  | 19.54723 | 0.162855 | 0.236938 |
| 27.51788 | 1.544938 | 0.906638 | 190.7343 | 50.76248 | 19.55268 | 0.1629   | 0.23742  |
| 27.57916 | 1.545366 | 0.906884 | 191.0756 | 50.77624 | 19.55811 | 0.162944 | 0.237902 |
| 27.64045 | 1.545793 | 0.907129 | 191.4166 | 50.78999 | 19.56354 | 0.162988 | 0.238383 |
| 27.70174 | 1.54622  | 0.907374 | 191.7571 | 50.80371 | 19.56896 | 0.163032 | 0.238864 |
| 27.76302 | 1.546647 | 0.907619 | 192.0973 | 50.81742 | 19.57438 | 0.163076 | 0.239345 |
| 27.82431 | 1.547073 | 0.907863 | 192.437  | 50.83111 | 19.57979 | 0.16312  | 0.239825 |
| 27.8856  | 1.547498 | 0.908107 | 192.7762 | 50.84478 | 19.58519 | 0.163164 | 0.240305 |
| 27.94688 | 1.547923 | 0.908351 | 193.1151 | 50.85844 | 19.59058 | 0.163208 | 0.240784 |
| 28.00817 | 1.548347 | 0.908594 | 193.4535 | 50.87208 | 19.59597 | 0.163252 | 0.241264 |
| 28.06946 | 1.548771 | 0.908837 | 193.7915 | 50.8857  | 19.60135 | 0.163296 | 0.241743 |
| 28.13075 | 1.549194 | 0.90908  | 194.1291 | 50.8993  | 19.60672 | 0.163339 | 0.242221 |
| 28.19203 | 1.549617 | 0.909322 | 194.4663 | 50.91288 | 19.61209 | 0.163383 | 0.242699 |
| 28.25332 | 1.550039 | 0.909564 | 194.803  | 50.92646 | 19.61745 | 0.163427 | 0.243177 |
| 28.31461 | 1.550461 | 0.909806 | 195.1394 | 50.94001 | 19.62281 | 0.16347  | 0.243655 |
| 28.37589 | 1.550882 | 0.910048 | 195.4753 | 50.95355 | 19.62816 | 0.163514 | 0.244132 |
| 28.43718 | 1.551303 | 0.910289 | 195.8108 | 50.96707 | 19.6335  | 0.163557 | 0.244609 |
| 28.49847 | 1.551723 | 0.91053  | 196.1459 | 50.98058 | 19.63883 | 0.1636   | 0.245085 |
| 28.55975 | 1.552142 | 0.910771 | 196.4805 | 50.99406 | 19.64416 | 0.163644 | 0.245561 |
| 28.62104 | 1.552561 | 0.911011 | 196.8148 | 51.00753 | 19.64949 | 0.163687 | 0.246037 |
| 28.68233 | 1.55298  | 0.911251 | 197.1486 | 51.02099 | 19.6548  | 0.16373  | 0.246512 |

|          |          |          |          |          |          |          |          |
|----------|----------|----------|----------|----------|----------|----------|----------|
| 28.74362 | 1.553398 | 0.911491 | 197.482  | 51.03443 | 19.66011 | 0.163774 | 0.246987 |
| 28.8049  | 1.553816 | 0.911731 | 197.815  | 51.04785 | 19.66541 | 0.163817 | 0.247462 |
| 28.86619 | 1.554233 | 0.91197  | 198.1476 | 51.06125 | 19.67071 | 0.16386  | 0.247937 |
| 28.92748 | 1.554649 | 0.912209 | 198.4798 | 51.07464 | 19.676   | 0.163903 | 0.248411 |
| 28.98876 | 1.555065 | 0.912447 | 198.8115 | 51.08801 | 19.68128 | 0.163946 | 0.248884 |
| 29.05005 | 1.555481 | 0.912686 | 199.1429 | 51.10136 | 19.68656 | 0.163989 | 0.249358 |
| 29.11134 | 1.555896 | 0.912924 | 199.4738 | 51.1147  | 19.69183 | 0.164031 | 0.249831 |
| 29.17263 | 1.55631  | 0.913161 | 199.8044 | 51.12802 | 19.69709 | 0.164074 | 0.250303 |
| 29.23391 | 1.556724 | 0.913399 | 200.1345 | 51.14132 | 19.70235 | 0.164117 | 0.250776 |
| 29.2952  | 1.557138 | 0.913636 | 200.4642 | 51.15461 | 19.7076  | 0.16416  | 0.251248 |
| 29.35649 | 1.557551 | 0.913873 | 200.7935 | 51.16788 | 19.71284 | 0.164202 | 0.251719 |
| 29.41777 | 1.557963 | 0.914109 | 201.1224 | 51.18113 | 19.71808 | 0.164245 | 0.252191 |
| 29.47906 | 1.558375 | 0.914345 | 201.4508 | 51.19437 | 19.72331 | 0.164287 | 0.252662 |
| 29.54035 | 1.558787 | 0.914581 | 201.7789 | 51.20759 | 19.72854 | 0.16433  | 0.253132 |
| 29.60163 | 1.559198 | 0.914817 | 202.1066 | 51.2208  | 19.73375 | 0.164372 | 0.253603 |
| 29.66292 | 1.559608 | 0.915052 | 202.4338 | 51.23398 | 19.73897 | 0.164415 | 0.254072 |
| 29.72421 | 1.560018 | 0.915287 | 202.7607 | 51.24716 | 19.74417 | 0.164457 | 0.254542 |
| 29.7855  | 1.560427 | 0.915522 | 203.0871 | 51.26031 | 19.74937 | 0.164499 | 0.255011 |
| 29.84678 | 1.560836 | 0.915757 | 203.4132 | 51.27345 | 19.75456 | 0.164541 | 0.25548  |
| 29.90807 | 1.561245 | 0.915991 | 203.7388 | 51.28657 | 19.75975 | 0.164584 | 0.255949 |
| 29.96936 | 1.561652 | 0.916225 | 204.064  | 51.29968 | 19.76493 | 0.164626 | 0.256417 |
| 30.03064 | 1.56206  | 0.916458 | 204.3888 | 51.31277 | 19.7701  | 0.164668 | 0.256885 |
| 30.09193 | 1.562467 | 0.916692 | 204.7133 | 51.32584 | 19.77527 | 0.16471  | 0.257352 |
| 30.15322 | 1.562873 | 0.916925 | 205.0373 | 51.3389  | 19.78043 | 0.164752 | 0.25782  |
| 30.2145  | 1.563279 | 0.917157 | 205.3609 | 51.35194 | 19.78558 | 0.164794 | 0.258286 |
| 30.27579 | 1.563684 | 0.91739  | 205.6841 | 51.36497 | 19.79073 | 0.164836 | 0.258753 |
| 30.33708 | 1.564089 | 0.917622 | 206.0069 | 51.37798 | 19.79587 | 0.164877 | 0.259219 |
| 30.39837 | 1.564494 | 0.917854 | 206.3293 | 51.39097 | 19.80101 | 0.164919 | 0.259685 |
| 30.45965 | 1.564898 | 0.918085 | 206.6513 | 51.40395 | 19.80614 | 0.164961 | 0.26015  |
| 30.52094 | 1.565301 | 0.918317 | 206.9729 | 51.41691 | 19.81126 | 0.165002 | 0.260616 |
| 30.58223 | 1.565704 | 0.918548 | 207.2941 | 51.42985 | 19.81638 | 0.165044 | 0.26108  |
| 30.64351 | 1.566106 | 0.918778 | 207.6149 | 51.44278 | 19.82149 | 0.165086 | 0.261545 |
| 30.7048  | 1.566508 | 0.919009 | 207.9353 | 51.4557  | 19.82659 | 0.165127 | 0.262009 |
| 30.76609 | 1.56691  | 0.919239 | 208.2554 | 51.46859 | 19.83169 | 0.165168 | 0.262473 |
| 30.82737 | 1.567311 | 0.919469 | 208.575  | 51.48147 | 19.83678 | 0.16521  | 0.262936 |
| 30.88866 | 1.567711 | 0.919698 | 208.8942 | 51.49434 | 19.84187 | 0.165251 | 0.263399 |
| 30.94995 | 1.568111 | 0.919928 | 209.213  | 51.50719 | 19.84694 | 0.165292 | 0.263862 |
| 31.01124 | 1.568511 | 0.920157 | 209.5314 | 51.52002 | 19.85202 | 0.165334 | 0.264324 |
| 31.07252 | 1.56891  | 0.920386 | 209.8495 | 51.53284 | 19.85708 | 0.165375 | 0.264787 |
| 31.13381 | 1.569308 | 0.920614 | 210.1671 | 51.54564 | 19.86214 | 0.165416 | 0.265248 |
| 31.1951  | 1.569706 | 0.920842 | 210.4843 | 51.55843 | 19.8672  | 0.165457 | 0.26571  |
| 31.25638 | 1.570104 | 0.92107  | 210.8012 | 51.5712  | 19.87225 | 0.165498 | 0.266171 |
| 31.31767 | 1.570501 | 0.921298 | 211.1176 | 51.58395 | 19.87729 | 0.165539 | 0.266632 |
| 31.37896 | 1.570897 | 0.921525 | 211.4337 | 51.59669 | 19.88232 | 0.16558  | 0.267092 |
| 31.44025 | 1.571293 | 0.921752 | 211.7493 | 51.60942 | 19.88735 | 0.165621 | 0.267552 |
| 31.50153 | 1.571689 | 0.921979 | 212.0646 | 51.62212 | 19.89238 | 0.165662 | 0.268012 |
| 31.56282 | 1.572084 | 0.922205 | 212.3795 | 51.63482 | 19.8974  | 0.165703 | 0.268471 |

|          |          |          |          |          |          |          |          |
|----------|----------|----------|----------|----------|----------|----------|----------|
| 31.62411 | 1.572479 | 0.922432 | 212.694  | 51.64749 | 19.90241 | 0.165743 | 0.26893  |
| 31.68539 | 1.572873 | 0.922658 | 213.0081 | 51.66015 | 19.90741 | 0.165784 | 0.269389 |
| 31.74668 | 1.573266 | 0.922883 | 213.3218 | 51.6728  | 19.91241 | 0.165825 | 0.269847 |
| 31.80797 | 1.57366  | 0.923109 | 213.6351 | 51.68543 | 19.91741 | 0.165865 | 0.270305 |
| 31.86925 | 1.574052 | 0.923334 | 213.948  | 51.69804 | 19.92239 | 0.165906 | 0.270763 |
| 31.93054 | 1.574445 | 0.923559 | 214.2605 | 51.71064 | 19.92737 | 0.165946 | 0.27122  |
| 31.99183 | 1.574836 | 0.923783 | 214.5727 | 51.72322 | 19.93235 | 0.165987 | 0.271677 |
| 32.05312 | 1.575227 | 0.924007 | 214.8845 | 51.73579 | 19.93732 | 0.166027 | 0.272134 |
| 32.1144  | 1.575618 | 0.924231 | 215.1958 | 51.74834 | 19.94228 | 0.166067 | 0.27259  |
| 32.17569 | 1.576008 | 0.924455 | 215.5068 | 51.76087 | 19.94723 | 0.166108 | 0.273046 |
| 32.23698 | 1.576398 | 0.924678 | 215.8174 | 51.77339 | 19.95218 | 0.166148 | 0.273502 |
| 32.29826 | 1.576787 | 0.924902 | 216.1276 | 51.7859  | 19.95713 | 0.166188 | 0.273957 |
| 32.35955 | 1.577176 | 0.925124 | 216.4375 | 51.79839 | 19.96206 | 0.166228 | 0.274412 |
| 32.42084 | 1.577565 | 0.925347 | 216.7469 | 51.81086 | 19.96699 | 0.166268 | 0.274867 |
| 32.48212 | 1.577952 | 0.925569 | 217.056  | 51.82332 | 19.97192 | 0.166308 | 0.275321 |
| 32.54341 | 1.57834  | 0.925791 | 217.3646 | 51.83576 | 19.97684 | 0.166348 | 0.275775 |
| 32.6047  | 1.578727 | 0.926013 | 217.6729 | 51.84818 | 19.98175 | 0.166388 | 0.276229 |
| 32.66599 | 1.579113 | 0.926235 | 217.9808 | 51.86059 | 19.98666 | 0.166428 | 0.276682 |
| 32.72727 | 1.579499 | 0.926456 | 218.2884 | 51.87299 | 19.99156 | 0.166468 | 0.277135 |
| 32.78856 | 1.579884 | 0.926677 | 218.5955 | 51.88537 | 19.99646 | 0.166508 | 0.277588 |
| 32.84985 | 1.580269 | 0.926897 | 218.9023 | 51.89773 | 20.00134 | 0.166547 | 0.27804  |
| 32.91113 | 1.580654 | 0.927118 | 219.2087 | 51.91008 | 20.00623 | 0.166587 | 0.278492 |
| 32.97242 | 1.581038 | 0.927338 | 219.5147 | 51.92242 | 20.0111  | 0.166627 | 0.278944 |
| 33.03371 | 1.581422 | 0.927558 | 219.8203 | 51.93474 | 20.01598 | 0.166666 | 0.279395 |
| 33.09499 | 1.581805 | 0.927777 | 220.1255 | 51.94704 | 20.02084 | 0.166706 | 0.279846 |
| 33.15628 | 1.582187 | 0.927997 | 220.4304 | 51.95933 | 20.0257  | 0.166745 | 0.280297 |
| 33.21757 | 1.582569 | 0.928216 | 220.7349 | 51.9716  | 20.03055 | 0.166785 | 0.280747 |
| 33.27886 | 1.582951 | 0.928434 | 221.039  | 51.98386 | 20.0354  | 0.166824 | 0.281197 |
| 33.34014 | 1.583332 | 0.928653 | 221.3427 | 51.9961  | 20.04024 | 0.166863 | 0.281647 |
| 33.40143 | 1.583713 | 0.928871 | 221.646  | 52.00833 | 20.04508 | 0.166903 | 0.282096 |
| 33.46272 | 1.584093 | 0.929089 | 221.949  | 52.02055 | 20.04991 | 0.166942 | 0.282545 |
| 33.524   | 1.584473 | 0.929307 | 222.2516 | 52.03274 | 20.05473 | 0.166981 | 0.282994 |
| 33.58529 | 1.584853 | 0.929524 | 222.5538 | 52.04493 | 20.05955 | 0.16702  | 0.283442 |
| 33.64658 | 1.585232 | 0.929741 | 222.8557 | 52.05709 | 20.06436 | 0.167059 | 0.28389  |
| 33.70787 | 1.58561  | 0.929958 | 223.1571 | 52.06925 | 20.06916 | 0.167098 | 0.284337 |
| 33.76915 | 1.585988 | 0.930175 | 223.4582 | 52.08138 | 20.07396 | 0.167137 | 0.284785 |
| 33.83044 | 1.586365 | 0.930391 | 223.759  | 52.09351 | 20.07876 | 0.167176 | 0.285232 |
| 33.89173 | 1.586742 | 0.930607 | 224.0593 | 52.10561 | 20.08355 | 0.167215 | 0.285678 |
| 33.95301 | 1.587119 | 0.930823 | 224.3593 | 52.11771 | 20.08833 | 0.167254 | 0.286125 |
| 34.0143  | 1.587495 | 0.931039 | 224.6589 | 52.12978 | 20.0931  | 0.167293 | 0.286571 |
| 34.07559 | 1.587871 | 0.931254 | 224.9581 | 52.14185 | 20.09788 | 0.167332 | 0.287016 |
| 34.13687 | 1.588246 | 0.931469 | 225.257  | 52.15389 | 20.10264 | 0.16737  | 0.287462 |
| 34.19816 | 1.588621 | 0.931684 | 225.5554 | 52.16593 | 20.1074  | 0.167409 | 0.287907 |
| 34.25945 | 1.588995 | 0.931898 | 225.8536 | 52.17795 | 20.11215 | 0.167448 | 0.288351 |
| 34.32074 | 1.589369 | 0.932112 | 226.1513 | 52.18995 | 20.1169  | 0.167486 | 0.288796 |
| 34.38202 | 1.589742 | 0.932326 | 226.4487 | 52.20194 | 20.12164 | 0.167525 | 0.28924  |
| 34.44331 | 1.590115 | 0.93254  | 226.7457 | 52.21391 | 20.12638 | 0.167563 | 0.289683 |

|          |          |          |          |          |          |          |          |
|----------|----------|----------|----------|----------|----------|----------|----------|
| 34.5046  | 1.590487 | 0.932753 | 227.0423 | 52.22587 | 20.13111 | 0.167602 | 0.290127 |
| 34.56588 | 1.590859 | 0.932967 | 227.3386 | 52.23782 | 20.13583 | 0.16764  | 0.29057  |
| 34.62717 | 1.591231 | 0.933179 | 227.6345 | 52.24975 | 20.14055 | 0.167678 | 0.291012 |
| 34.68846 | 1.591602 | 0.933392 | 227.93   | 52.26166 | 20.14526 | 0.167717 | 0.291455 |
| 34.74974 | 1.591973 | 0.933604 | 228.2252 | 52.27356 | 20.14997 | 0.167755 | 0.291897 |
| 34.81103 | 1.592343 | 0.933817 | 228.52   | 52.28545 | 20.15467 | 0.167793 | 0.292338 |
| 34.87232 | 1.592713 | 0.934028 | 228.8144 | 52.29732 | 20.15936 | 0.167831 | 0.29278  |
| 34.93361 | 1.593082 | 0.93424  | 229.1084 | 52.30917 | 20.16405 | 0.167869 | 0.293221 |
| 34.99489 | 1.593451 | 0.934451 | 229.4021 | 52.32102 | 20.16874 | 0.167907 | 0.293661 |
| 35.05618 | 1.593819 | 0.934662 | 229.6955 | 52.33284 | 20.17342 | 0.167945 | 0.294102 |
| 35.11747 | 1.594187 | 0.934873 | 229.9884 | 52.34466 | 20.17809 | 0.167983 | 0.294542 |
| 35.17875 | 1.594555 | 0.935084 | 230.281  | 52.35646 | 20.18276 | 0.168021 | 0.294982 |
| 35.24004 | 1.594922 | 0.935294 | 230.5733 | 52.36824 | 20.18742 | 0.168059 | 0.295421 |
| 35.30133 | 1.595288 | 0.935504 | 230.8652 | 52.38001 | 20.19207 | 0.168097 | 0.29586  |
| 35.36261 | 1.595654 | 0.935714 | 231.1567 | 52.39176 | 20.19672 | 0.168135 | 0.296299 |
| 35.4239  | 1.59602  | 0.935923 | 231.4478 | 52.4035  | 20.20137 | 0.168172 | 0.296737 |
| 35.48519 | 1.596385 | 0.936133 | 231.7386 | 52.41523 | 20.20601 | 0.16821  | 0.297175 |
| 35.54648 | 1.59675  | 0.936342 | 232.029  | 52.42694 | 20.21064 | 0.168248 | 0.297613 |
| 35.60776 | 1.597114 | 0.93655  | 232.3191 | 52.43864 | 20.21527 | 0.168285 | 0.29805  |
| 35.66905 | 1.597478 | 0.936759 | 232.6088 | 52.45032 | 20.21989 | 0.168323 | 0.298487 |
| 35.73034 | 1.597842 | 0.936967 | 232.8982 | 52.46199 | 20.2245  | 0.16836  | 0.298924 |
| 35.79162 | 1.598205 | 0.937175 | 233.1872 | 52.47365 | 20.22911 | 0.168398 | 0.299361 |
| 35.85291 | 1.598568 | 0.937383 | 233.4758 | 52.48529 | 20.23372 | 0.168435 | 0.299797 |
| 35.9142  | 1.59893  | 0.93759  | 233.764  | 52.49691 | 20.23832 | 0.168472 | 0.300233 |
| 35.97549 | 1.599291 | 0.937798 | 234.052  | 52.50853 | 20.24291 | 0.16851  | 0.300668 |
| 36.03677 | 1.599653 | 0.938005 | 234.3395 | 52.52012 | 20.2475  | 0.168547 | 0.301103 |
| 36.09806 | 1.600014 | 0.938211 | 234.6267 | 52.53171 | 20.25208 | 0.168584 | 0.301538 |
| 36.15935 | 1.600374 | 0.938418 | 234.9135 | 52.54328 | 20.25666 | 0.168621 | 0.301972 |
| 36.22063 | 1.600734 | 0.938624 | 235.2    | 52.55483 | 20.26123 | 0.168658 | 0.302406 |
| 36.28192 | 1.601093 | 0.93883  | 235.4862 | 52.56637 | 20.2658  | 0.168696 | 0.30284  |
| 36.34321 | 1.601452 | 0.939035 | 235.7719 | 52.57789 | 20.27036 | 0.168733 | 0.303274 |
| 36.40449 | 1.601811 | 0.939241 | 236.0573 | 52.5894  | 20.27491 | 0.16877  | 0.303707 |
| 36.46578 | 1.602169 | 0.939446 | 236.3424 | 52.6009  | 20.27946 | 0.168806 | 0.30414  |
| 36.52707 | 1.602527 | 0.939651 | 236.6271 | 52.61238 | 20.284   | 0.168843 | 0.304572 |
| 36.58836 | 1.602884 | 0.939855 | 236.9115 | 52.62384 | 20.28854 | 0.16888  | 0.305005 |
| 36.64964 | 1.603241 | 0.94006  | 237.1955 | 52.6353  | 20.29307 | 0.168917 | 0.305436 |
| 36.71093 | 1.603597 | 0.940264 | 237.4791 | 52.64673 | 20.29759 | 0.168954 | 0.305868 |
| 36.77222 | 1.603953 | 0.940468 | 237.7624 | 52.65816 | 20.30211 | 0.16899  | 0.306299 |
| 36.8335  | 1.604308 | 0.940671 | 238.0454 | 52.66957 | 20.30662 | 0.169027 | 0.30673  |
| 36.89479 | 1.604663 | 0.940875 | 238.328  | 52.68096 | 20.31113 | 0.169064 | 0.307161 |
| 36.95608 | 1.605018 | 0.941078 | 238.6102 | 52.69234 | 20.31564 | 0.1691   | 0.307591 |
| 37.01736 | 1.605372 | 0.941281 | 238.8921 | 52.70371 | 20.32013 | 0.169137 | 0.308021 |
| 37.07865 | 1.605726 | 0.941483 | 239.1736 | 52.71506 | 20.32463 | 0.169173 | 0.30845  |
| 37.13994 | 1.606079 | 0.941686 | 239.4548 | 52.7264  | 20.32911 | 0.16921  | 0.30888  |
| 37.20123 | 1.606432 | 0.941888 | 239.7357 | 52.73773 | 20.33359 | 0.169246 | 0.309309 |
| 37.26251 | 1.606784 | 0.94209  | 240.0162 | 52.74904 | 20.33807 | 0.169282 | 0.309737 |
| 37.3238  | 1.607136 | 0.942291 | 240.2963 | 52.76034 | 20.34254 | 0.169319 | 0.310166 |

|          |          |          |          |          |          |          |          |
|----------|----------|----------|----------|----------|----------|----------|----------|
| 37.38509 | 1.607488 | 0.942493 | 240.5761 | 52.77162 | 20.347   | 0.169355 | 0.310594 |
| 37.44637 | 1.607839 | 0.942694 | 240.8556 | 52.78289 | 20.35146 | 0.169391 | 0.311021 |
| 37.50766 | 1.60819  | 0.942895 | 241.1347 | 52.79415 | 20.35592 | 0.169427 | 0.311449 |
| 37.56895 | 1.60854  | 0.943095 | 241.4134 | 52.80539 | 20.36037 | 0.169463 | 0.311876 |
| 37.63023 | 1.60889  | 0.943296 | 241.6918 | 52.81662 | 20.36481 | 0.1695   | 0.312302 |
| 37.69152 | 1.609239 | 0.943496 | 241.9699 | 52.82783 | 20.36925 | 0.169536 | 0.312729 |
| 37.75281 | 1.609588 | 0.943696 | 242.2476 | 52.83903 | 20.37368 | 0.169572 | 0.313155 |
| 37.8141  | 1.609937 | 0.943895 | 242.525  | 52.85022 | 20.3781  | 0.169608 | 0.31358  |
| 37.87538 | 1.610285 | 0.944095 | 242.802  | 52.86139 | 20.38253 | 0.169643 | 0.314006 |
| 37.93667 | 1.610632 | 0.944294 | 243.0787 | 52.87255 | 20.38694 | 0.169679 | 0.314431 |
| 37.99796 | 1.61098  | 0.944493 | 243.355  | 52.88369 | 20.39135 | 0.169715 | 0.314856 |
| 38.05924 | 1.611326 | 0.944692 | 243.631  | 52.89482 | 20.39576 | 0.169751 | 0.31528  |
| 38.12053 | 1.611673 | 0.94489  | 243.9067 | 52.90594 | 20.40016 | 0.169787 | 0.315704 |
| 38.18182 | 1.612019 | 0.945088 | 244.182  | 52.91704 | 20.40455 | 0.169822 | 0.316128 |
| 38.24311 | 1.612364 | 0.945286 | 244.457  | 52.92813 | 20.40894 | 0.169858 | 0.316551 |
| 38.30439 | 1.61271  | 0.945484 | 244.7316 | 52.93921 | 20.41332 | 0.169893 | 0.316975 |
| 38.36568 | 1.613054 | 0.945681 | 245.0059 | 52.95027 | 20.4177  | 0.169929 | 0.317397 |
| 38.42697 | 1.613399 | 0.945878 | 245.2798 | 52.96132 | 20.42207 | 0.169965 | 0.31782  |
| 38.48825 | 1.613743 | 0.946075 | 245.5534 | 52.97236 | 20.42644 | 0.17     | 0.318242 |
| 38.54954 | 1.614086 | 0.946272 | 245.8267 | 52.98338 | 20.4308  | 0.170035 | 0.318664 |
| 38.61083 | 1.614429 | 0.946468 | 246.0996 | 52.99439 | 20.43516 | 0.170071 | 0.319086 |
| 38.67211 | 1.614772 | 0.946665 | 246.3722 | 53.00538 | 20.43951 | 0.170106 | 0.319507 |
| 38.7334  | 1.615114 | 0.946861 | 246.6445 | 53.01636 | 20.44386 | 0.170141 | 0.319928 |
| 38.79469 | 1.615456 | 0.947056 | 246.9164 | 53.02733 | 20.4482  | 0.170177 | 0.320348 |
| 38.85598 | 1.615797 | 0.947252 | 247.1879 | 53.03828 | 20.45253 | 0.170212 | 0.320769 |
| 38.91726 | 1.616138 | 0.947447 | 247.4592 | 53.04922 | 20.45686 | 0.170247 | 0.321189 |
| 38.97855 | 1.616479 | 0.947642 | 247.7301 | 53.06015 | 20.46119 | 0.170282 | 0.321608 |
| 39.03984 | 1.616819 | 0.947837 | 248.0006 | 53.07106 | 20.46551 | 0.170317 | 0.322028 |
| 39.10112 | 1.617158 | 0.948031 | 248.2708 | 53.08196 | 20.46982 | 0.170352 | 0.322447 |
| 39.16241 | 1.617498 | 0.948226 | 248.5407 | 53.09285 | 20.47413 | 0.170387 | 0.322865 |
| 39.2237  | 1.617837 | 0.94842  | 248.8103 | 53.10372 | 20.47844 | 0.170422 | 0.323284 |
| 39.28498 | 1.618175 | 0.948614 | 249.0795 | 53.11458 | 20.48274 | 0.170457 | 0.323702 |
| 39.34627 | 1.618513 | 0.948807 | 249.3484 | 53.12543 | 20.48703 | 0.170492 | 0.324119 |
| 39.40756 | 1.618851 | 0.949    | 249.6169 | 53.13626 | 20.49132 | 0.170527 | 0.324537 |
| 39.46885 | 1.619188 | 0.949194 | 249.8851 | 53.14708 | 20.4956  | 0.170561 | 0.324954 |
| 39.53013 | 1.619525 | 0.949386 | 250.153  | 53.15789 | 20.49988 | 0.170596 | 0.325371 |
| 39.59142 | 1.619861 | 0.949579 | 250.4206 | 53.16868 | 20.50415 | 0.170631 | 0.325787 |
| 39.65271 | 1.620197 | 0.949771 | 250.6878 | 53.17946 | 20.50842 | 0.170665 | 0.326203 |
| 39.71399 | 1.620533 | 0.949964 | 250.9547 | 53.19023 | 20.51268 | 0.1707   | 0.326619 |
| 39.77528 | 1.620868 | 0.950155 | 251.2212 | 53.20098 | 20.51694 | 0.170735 | 0.327035 |
| 39.83657 | 1.621203 | 0.950347 | 251.4874 | 53.21172 | 20.52119 | 0.170769 | 0.32745  |
| 39.89785 | 1.621537 | 0.950539 | 251.7533 | 53.22245 | 20.52544 | 0.170804 | 0.327865 |
| 39.95914 | 1.621871 | 0.95073  | 252.0189 | 53.23317 | 20.52968 | 0.170838 | 0.328279 |
| 40.02043 | 1.622205 | 0.950921 | 252.2841 | 53.24387 | 20.53392 | 0.170872 | 0.328694 |
| 40.08172 | 1.622538 | 0.951111 | 252.549  | 53.25455 | 20.53815 | 0.170907 | 0.329108 |
| 40.143   | 1.622871 | 0.951302 | 252.8136 | 53.26523 | 20.54238 | 0.170941 | 0.329521 |
| 40.20429 | 1.623203 | 0.951492 | 253.0778 | 53.27589 | 20.5466  | 0.170975 | 0.329935 |

|          |          |          |          |          |          |          |          |
|----------|----------|----------|----------|----------|----------|----------|----------|
| 40.26558 | 1.623535 | 0.951682 | 253.3417 | 53.28654 | 20.55081 | 0.171009 | 0.330348 |
| 40.32686 | 1.623867 | 0.951872 | 253.6053 | 53.29717 | 20.55502 | 0.171044 | 0.33076  |
| 40.38815 | 1.624198 | 0.952062 | 253.8686 | 53.3078  | 20.55923 | 0.171078 | 0.331173 |
| 40.44944 | 1.624529 | 0.952251 | 254.1315 | 53.31841 | 20.56343 | 0.171112 | 0.331585 |
| 40.51073 | 1.624859 | 0.95244  | 254.3941 | 53.329   | 20.56763 | 0.171146 | 0.331996 |
| 40.57201 | 1.625189 | 0.952629 | 254.6564 | 53.33958 | 20.57181 | 0.17118  | 0.332408 |
| 40.6333  | 1.625518 | 0.952817 | 254.9183 | 53.35015 | 20.576   | 0.171214 | 0.332819 |
| 40.69459 | 1.625847 | 0.953006 | 255.18   | 53.3607  | 20.58018 | 0.171248 | 0.33323  |
| 40.75587 | 1.626176 | 0.953194 | 255.4413 | 53.37125 | 20.58435 | 0.171282 | 0.33364  |
| 40.81716 | 1.626504 | 0.953382 | 255.7023 | 53.38177 | 20.58852 | 0.171315 | 0.33405  |
| 40.87845 | 1.626832 | 0.95357  | 255.9629 | 53.39229 | 20.59268 | 0.171349 | 0.33446  |
| 40.93973 | 1.627159 | 0.953757 | 256.2232 | 53.40279 | 20.59684 | 0.171383 | 0.33487  |
| 41.00102 | 1.627486 | 0.953944 | 256.4833 | 53.41328 | 20.60099 | 0.171417 | 0.335279 |
| 41.06231 | 1.627813 | 0.954131 | 256.7429 | 53.42376 | 20.60514 | 0.17145  | 0.335688 |
| 41.1236  | 1.628139 | 0.954318 | 257.0023 | 53.43422 | 20.60929 | 0.171484 | 0.336096 |
| 41.18488 | 1.628465 | 0.954504 | 257.2613 | 53.44467 | 20.61342 | 0.171517 | 0.336505 |
| 41.24617 | 1.62879  | 0.954691 | 257.5201 | 53.45511 | 20.61756 | 0.171551 | 0.336913 |
| 41.30746 | 1.629115 | 0.954877 | 257.7785 | 53.46554 | 20.62168 | 0.171585 | 0.33732  |
| 41.36874 | 1.62944  | 0.955063 | 258.0365 | 53.47595 | 20.62581 | 0.171618 | 0.337728 |
| 41.43003 | 1.629764 | 0.955248 | 258.2943 | 53.48635 | 20.62992 | 0.171651 | 0.338135 |
| 41.49132 | 1.630088 | 0.955434 | 258.5517 | 53.49673 | 20.63404 | 0.171685 | 0.338541 |
| 41.5526  | 1.630412 | 0.955619 | 258.8088 | 53.50711 | 20.63814 | 0.171718 | 0.338948 |
| 41.61389 | 1.630735 | 0.955804 | 259.0656 | 53.51747 | 20.64225 | 0.171751 | 0.339354 |
| 41.67518 | 1.631057 | 0.955988 | 259.3221 | 53.52782 | 20.64634 | 0.171785 | 0.33976  |
| 41.73647 | 1.631379 | 0.956173 | 259.5783 | 53.53815 | 20.65044 | 0.171818 | 0.340165 |
| 41.79775 | 1.631701 | 0.956357 | 259.8341 | 53.54847 | 20.65452 | 0.171851 | 0.34057  |
| 41.85904 | 1.632023 | 0.956541 | 260.0896 | 53.55878 | 20.65861 | 0.171884 | 0.340975 |
| 41.92033 | 1.632344 | 0.956725 | 260.3448 | 53.56908 | 20.66268 | 0.171917 | 0.34138  |
| 41.98161 | 1.632664 | 0.956908 | 260.5997 | 53.57936 | 20.66676 | 0.17195  | 0.341784 |
| 42.0429  | 1.632985 | 0.957091 | 260.8543 | 53.58963 | 20.67082 | 0.171983 | 0.342188 |
| 42.10419 | 1.633304 | 0.957275 | 261.1085 | 53.59989 | 20.67489 | 0.172016 | 0.342592 |
| 42.16547 | 1.633624 | 0.957457 | 261.3625 | 53.61014 | 20.67894 | 0.172049 | 0.342995 |
| 42.22676 | 1.633943 | 0.95764  | 261.6161 | 53.62037 | 20.683   | 0.172082 | 0.343398 |
| 42.28805 | 1.634262 | 0.957822 | 261.8694 | 53.63059 | 20.68704 | 0.172115 | 0.343801 |
| 42.34934 | 1.63458  | 0.958005 | 262.1224 | 53.6408  | 20.69109 | 0.172148 | 0.344203 |
| 42.41062 | 1.634898 | 0.958187 | 262.3751 | 53.651   | 20.69512 | 0.17218  | 0.344605 |
| 42.47191 | 1.635215 | 0.958368 | 262.6275 | 53.66118 | 20.69915 | 0.172213 | 0.345007 |
| 42.5332  | 1.635532 | 0.95855  | 262.8795 | 53.67135 | 20.70318 | 0.172246 | 0.345408 |
| 42.59448 | 1.635849 | 0.958731 | 263.1312 | 53.68151 | 20.7072  | 0.172278 | 0.345809 |
| 42.65577 | 1.636165 | 0.958912 | 263.3827 | 53.69165 | 20.71122 | 0.172311 | 0.34621  |
| 42.71706 | 1.636481 | 0.959093 | 263.6338 | 53.70178 | 20.71524 | 0.172344 | 0.346611 |
| 42.77835 | 1.636797 | 0.959274 | 263.8846 | 53.7119  | 20.71924 | 0.172376 | 0.347011 |
| 42.83963 | 1.637112 | 0.959454 | 264.1351 | 53.72201 | 20.72325 | 0.172409 | 0.347411 |
| 42.90092 | 1.637427 | 0.959634 | 264.3852 | 53.73211 | 20.72724 | 0.172441 | 0.34781  |
| 42.96221 | 1.637741 | 0.959814 | 264.6351 | 53.74219 | 20.73124 | 0.172473 | 0.34821  |
| 43.02349 | 1.638055 | 0.959994 | 264.8847 | 53.75226 | 20.73522 | 0.172506 | 0.348609 |
| 43.08478 | 1.638369 | 0.960173 | 265.1339 | 53.76231 | 20.73921 | 0.172538 | 0.349007 |

|          |          |          |          |          |          |          |          |
|----------|----------|----------|----------|----------|----------|----------|----------|
| 43.14607 | 1.638682 | 0.960353 | 265.3828 | 53.77236 | 20.74319 | 0.17257  | 0.349406 |
| 43.20735 | 1.638995 | 0.960532 | 265.6315 | 53.78239 | 20.74716 | 0.172603 | 0.349804 |
| 43.26864 | 1.639307 | 0.96071  | 265.8798 | 53.79241 | 20.75113 | 0.172635 | 0.350202 |
| 43.32993 | 1.639619 | 0.960889 | 266.1278 | 53.80242 | 20.75509 | 0.172667 | 0.350599 |
| 43.39122 | 1.639931 | 0.961067 | 266.3755 | 53.81241 | 20.75905 | 0.172699 | 0.350996 |
| 43.4525  | 1.640242 | 0.961246 | 266.6229 | 53.8224  | 20.763   | 0.172731 | 0.351393 |
| 43.51379 | 1.640553 | 0.961423 | 266.87   | 53.83237 | 20.76695 | 0.172763 | 0.35179  |
| 43.57508 | 1.640864 | 0.961601 | 267.1168 | 53.84233 | 20.7709  | 0.172795 | 0.352186 |
| 43.63636 | 1.641174 | 0.961779 | 267.3632 | 53.85227 | 20.77484 | 0.172827 | 0.352582 |
| 43.69765 | 1.641484 | 0.961956 | 267.6094 | 53.86221 | 20.77877 | 0.172859 | 0.352977 |
| 43.75894 | 1.641793 | 0.962133 | 267.8553 | 53.87213 | 20.7827  | 0.172891 | 0.353373 |
| 43.82022 | 1.642102 | 0.96231  | 268.1008 | 53.88204 | 20.78662 | 0.172923 | 0.353768 |
| 43.88151 | 1.642411 | 0.962487 | 268.3461 | 53.89193 | 20.79054 | 0.172955 | 0.354162 |
| 43.9428  | 1.642719 | 0.962663 | 268.591  | 53.90182 | 20.79446 | 0.172986 | 0.354557 |
| 44.00409 | 1.643027 | 0.962839 | 268.8356 | 53.91169 | 20.79837 | 0.173018 | 0.354951 |
| 44.06537 | 1.643334 | 0.963015 | 269.08   | 53.92155 | 20.80227 | 0.17305  | 0.355345 |
| 44.12666 | 1.643641 | 0.963191 | 269.324  | 53.9314  | 20.80618 | 0.173081 | 0.355738 |
| 44.18795 | 1.643948 | 0.963366 | 269.5677 | 53.94123 | 20.81007 | 0.173113 | 0.356131 |
| 44.24923 | 1.644255 | 0.963542 | 269.8112 | 53.95106 | 20.81396 | 0.173144 | 0.356524 |
| 44.31052 | 1.644561 | 0.963717 | 270.0543 | 53.96087 | 20.81785 | 0.173176 | 0.356917 |
| 44.37181 | 1.644866 | 0.963892 | 270.2971 | 53.97067 | 20.82173 | 0.173207 | 0.357309 |
| 44.43309 | 1.645171 | 0.964066 | 270.5396 | 53.98045 | 20.82561 | 0.173239 | 0.357701 |
| 44.49438 | 1.645476 | 0.964241 | 270.7818 | 53.99023 | 20.82948 | 0.17327  | 0.358093 |
| 44.55567 | 1.645781 | 0.964415 | 271.0238 | 53.99999 | 20.83335 | 0.173302 | 0.358484 |
| 44.61696 | 1.646085 | 0.964589 | 271.2654 | 54.00974 | 20.83721 | 0.173333 | 0.358875 |
| 44.67824 | 1.646388 | 0.964763 | 271.5067 | 54.01948 | 20.84107 | 0.173364 | 0.359266 |
| 44.73953 | 1.646692 | 0.964936 | 271.7477 | 54.02921 | 20.84492 | 0.173396 | 0.359656 |
| 44.80082 | 1.646995 | 0.96511  | 271.9884 | 54.03892 | 20.84877 | 0.173427 | 0.360046 |
| 44.8621  | 1.647297 | 0.965283 | 272.2288 | 54.04862 | 20.85261 | 0.173458 | 0.360436 |
| 44.92339 | 1.6476   | 0.965456 | 272.469  | 54.05831 | 20.85645 | 0.173489 | 0.360826 |
| 44.98468 | 1.647901 | 0.965629 | 272.7088 | 54.06799 | 20.86028 | 0.17352  | 0.361215 |
| 45.04597 | 1.648203 | 0.965801 | 272.9483 | 54.07766 | 20.86411 | 0.173551 | 0.361604 |
| 45.10725 | 1.648504 | 0.965973 | 273.1875 | 54.08731 | 20.86794 | 0.173582 | 0.361993 |
| 45.16854 | 1.648805 | 0.966145 | 273.4265 | 54.09695 | 20.87176 | 0.173613 | 0.362381 |
| 45.22983 | 1.649105 | 0.966317 | 273.6651 | 54.10658 | 20.87557 | 0.173644 | 0.362769 |
| 45.29111 | 1.649405 | 0.966489 | 273.9034 | 54.1162  | 20.87938 | 0.173675 | 0.363157 |
| 45.3524  | 1.649705 | 0.96666  | 274.1415 | 54.12581 | 20.88319 | 0.173706 | 0.363544 |
| 45.41369 | 1.650004 | 0.966832 | 274.3792 | 54.1354  | 20.88699 | 0.173737 | 0.363931 |
| 45.47497 | 1.650303 | 0.967003 | 274.6167 | 54.14499 | 20.89078 | 0.173768 | 0.364318 |
| 45.53626 | 1.650601 | 0.967174 | 274.8538 | 54.15456 | 20.89458 | 0.173798 | 0.364705 |
| 45.59755 | 1.6509   | 0.967344 | 275.0907 | 54.16412 | 20.89836 | 0.173829 | 0.365091 |
| 45.65884 | 1.651197 | 0.967515 | 275.3273 | 54.17366 | 20.90214 | 0.17386  | 0.365477 |
| 45.72012 | 1.651495 | 0.967685 | 275.5635 | 54.1832  | 20.90592 | 0.17389  | 0.365862 |
| 45.78141 | 1.651792 | 0.967855 | 275.7995 | 54.19272 | 20.90969 | 0.173921 | 0.366248 |
| 45.8427  | 1.652089 | 0.968024 | 276.0352 | 54.20223 | 20.91346 | 0.173951 | 0.366633 |
| 45.90398 | 1.652385 | 0.968194 | 276.2706 | 54.21173 | 20.91723 | 0.173982 | 0.367017 |
| 45.96527 | 1.652681 | 0.968363 | 276.5057 | 54.22122 | 20.92099 | 0.174013 | 0.367402 |



|          |          |          |          |          |          |          |          |
|----------|----------|----------|----------|----------|----------|----------|----------|
| 46.02656 | 1.652976 | 0.968532 | 276.7405 | 54.2307  | 20.92474 | 0.174043 | 0.367786 |
| 46.08784 | 1.653272 | 0.968701 | 276.975  | 54.24016 | 20.92849 | 0.174073 | 0.36817  |
| 46.14913 | 1.653567 | 0.96887  | 277.2092 | 54.24962 | 20.93223 | 0.174104 | 0.368553 |
| 46.21042 | 1.653861 | 0.969039 | 277.4432 | 54.25906 | 20.93598 | 0.174134 | 0.368936 |
| 46.27171 | 1.654155 | 0.969207 | 277.6768 | 54.26849 | 20.93971 | 0.174164 | 0.369319 |
| 46.33299 | 1.654449 | 0.969375 | 277.9102 | 54.27791 | 20.94344 | 0.174195 | 0.369702 |
| 46.39428 | 1.654742 | 0.969543 | 278.1432 | 54.28731 | 20.94717 | 0.174225 | 0.370084 |
| 46.45557 | 1.655035 | 0.96971  | 278.376  | 54.29671 | 20.95089 | 0.174255 | 0.370466 |
| 46.51685 | 1.655328 | 0.969878 | 278.6085 | 54.30609 | 20.95461 | 0.174285 | 0.370848 |
| 46.57814 | 1.65562  | 0.970045 | 278.8407 | 54.31546 | 20.95832 | 0.174315 | 0.37123  |
| 46.63943 | 1.655912 | 0.970212 | 279.0726 | 54.32482 | 20.96203 | 0.174345 | 0.371611 |
| 46.70072 | 1.656204 | 0.970379 | 279.3042 | 54.33417 | 20.96573 | 0.174375 | 0.371992 |
| 46.762   | 1.656495 | 0.970546 | 279.5356 | 54.3435  | 20.96943 | 0.174405 | 0.372372 |
| 46.82329 | 1.656786 | 0.970712 | 279.7666 | 54.35283 | 20.97313 | 0.174435 | 0.372752 |
| 46.88458 | 1.657077 | 0.970878 | 279.9974 | 54.36214 | 20.97682 | 0.174465 | 0.373132 |
| 46.94586 | 1.657367 | 0.971044 | 280.2278 | 54.37144 | 20.9805  | 0.174495 | 0.373512 |
| 47.00715 | 1.657657 | 0.97121  | 280.458  | 54.38073 | 20.98418 | 0.174525 | 0.373891 |
| 47.06844 | 1.657946 | 0.971376 | 280.6879 | 54.39001 | 20.98786 | 0.174555 | 0.37427  |
| 47.12972 | 1.658235 | 0.971541 | 280.9175 | 54.39928 | 20.99153 | 0.174585 | 0.374649 |
| 47.19101 | 1.658524 | 0.971706 | 281.1469 | 54.40853 | 20.9952  | 0.174614 | 0.375028 |
| 47.2523  | 1.658812 | 0.971871 | 281.3759 | 54.41778 | 20.99886 | 0.174644 | 0.375406 |
| 47.31359 | 1.6591   | 0.972036 | 281.6047 | 54.42701 | 21.00252 | 0.174674 | 0.375784 |
| 47.37487 | 1.659388 | 0.972201 | 281.8331 | 54.43623 | 21.00617 | 0.174703 | 0.376161 |
| 47.43616 | 1.659675 | 0.972365 | 282.0613 | 54.44544 | 21.00982 | 0.174733 | 0.376538 |
| 47.49745 | 1.659962 | 0.972529 | 282.2892 | 54.45464 | 21.01347 | 0.174762 | 0.376915 |
| 47.55873 | 1.660249 | 0.972693 | 282.5168 | 54.46383 | 21.01711 | 0.174792 | 0.377292 |
| 47.62002 | 1.660535 | 0.972857 | 282.7442 | 54.473   | 21.02074 | 0.174821 | 0.377669 |
| 47.68131 | 1.660821 | 0.97302  | 282.9712 | 54.48217 | 21.02437 | 0.174851 | 0.378045 |
| 47.74259 | 1.661106 | 0.973184 | 283.198  | 54.49132 | 21.028   | 0.17488  | 0.37842  |
| 47.80388 | 1.661391 | 0.973347 | 283.4245 | 54.50046 | 21.03162 | 0.17491  | 0.378796 |
| 47.86517 | 1.661676 | 0.97351  | 283.6507 | 54.50959 | 21.03524 | 0.174939 | 0.379171 |
| 47.92646 | 1.661961 | 0.973673 | 283.8767 | 54.51871 | 21.03885 | 0.174968 | 0.379546 |
| 47.98774 | 1.662245 | 0.973835 | 284.1023 | 54.52782 | 21.04246 | 0.174998 | 0.379921 |
| 48.04903 | 1.662529 | 0.973997 | 284.3277 | 54.53691 | 21.04607 | 0.175027 | 0.380295 |
| 48.11032 | 1.662812 | 0.97416  | 284.5528 | 54.546   | 21.04967 | 0.175056 | 0.380669 |
| 48.1716  | 1.663095 | 0.974322 | 284.7776 | 54.55507 | 21.05326 | 0.175085 | 0.381043 |
| 48.23289 | 1.663378 | 0.974483 | 285.0021 | 54.56413 | 21.05685 | 0.175114 | 0.381416 |
| 48.29418 | 1.66366  | 0.974645 | 285.2264 | 54.57318 | 21.06044 | 0.175143 | 0.38179  |
| 48.35546 | 1.663942 | 0.974806 | 285.4503 | 54.58222 | 21.06402 | 0.175172 | 0.382162 |
| 48.41675 | 1.664224 | 0.974967 | 285.674  | 54.59125 | 21.0676  | 0.175201 | 0.382535 |
| 48.47804 | 1.664505 | 0.975128 | 285.8974 | 54.60027 | 21.07117 | 0.17523  | 0.382907 |
| 48.53933 | 1.664786 | 0.975289 | 286.1206 | 54.60927 | 21.07474 | 0.175259 | 0.383279 |
| 48.60061 | 1.665067 | 0.975449 | 286.3434 | 54.61827 | 21.0783  | 0.175288 | 0.383651 |
| 48.6619  | 1.665347 | 0.97561  | 286.566  | 54.62725 | 21.08186 | 0.175317 | 0.384022 |
| 48.72319 | 1.665627 | 0.97577  | 286.7883 | 54.63622 | 21.08542 | 0.175346 | 0.384394 |
| 48.78447 | 1.665907 | 0.97593  | 287.0104 | 54.64519 | 21.08897 | 0.175375 | 0.384764 |
| 48.84576 | 1.666186 | 0.97609  | 287.2321 | 54.65414 | 21.09252 | 0.175403 | 0.385135 |

|          |          |          |          |          |          |          |          |
|----------|----------|----------|----------|----------|----------|----------|----------|
| 48.90705 | 1.666465 | 0.976249 | 287.4536 | 54.66308 | 21.09606 | 0.175432 | 0.385505 |
| 48.96834 | 1.666743 | 0.976408 | 287.6748 | 54.672   | 21.0996  | 0.175461 | 0.385875 |
| 49.02962 | 1.667022 | 0.976568 | 287.8957 | 54.68092 | 21.10313 | 0.175489 | 0.386245 |
| 49.09091 | 1.667299 | 0.976727 | 288.1164 | 54.68983 | 21.10666 | 0.175518 | 0.386614 |
| 49.1522  | 1.667577 | 0.976885 | 288.3368 | 54.69872 | 21.11019 | 0.175547 | 0.386983 |
| 49.21348 | 1.667854 | 0.977044 | 288.5569 | 54.70761 | 21.11371 | 0.175575 | 0.387352 |
| 49.27477 | 1.668131 | 0.977202 | 288.7767 | 54.71648 | 21.11722 | 0.175604 | 0.387721 |
| 49.33606 | 1.668408 | 0.97736  | 288.9963 | 54.72534 | 21.12074 | 0.175632 | 0.388089 |
| 49.39734 | 1.668684 | 0.977518 | 289.2156 | 54.7342  | 21.12424 | 0.175661 | 0.388457 |
| 49.45863 | 1.66896  | 0.977676 | 289.4346 | 54.74304 | 21.12775 | 0.175689 | 0.388824 |
| 49.51992 | 1.669235 | 0.977834 | 289.6534 | 54.75187 | 21.13125 | 0.175717 | 0.389192 |
| 49.58121 | 1.66951  | 0.977991 | 289.8719 | 54.76069 | 21.13474 | 0.175746 | 0.389559 |
| 49.64249 | 1.669785 | 0.978148 | 290.0901 | 54.76949 | 21.13823 | 0.175774 | 0.389926 |
| 49.70378 | 1.67006  | 0.978305 | 290.308  | 54.77829 | 21.14172 | 0.175802 | 0.390292 |
| 49.76507 | 1.670334 | 0.978462 | 290.5257 | 54.78708 | 21.1452  | 0.175831 | 0.390658 |
| 49.82635 | 1.670608 | 0.978619 | 290.7431 | 54.79585 | 21.14868 | 0.175859 | 0.391024 |
| 49.88764 | 1.670881 | 0.978775 | 290.9602 | 54.80462 | 21.15215 | 0.175887 | 0.39139  |
| 49.94893 | 1.671154 | 0.978932 | 291.1771 | 54.81337 | 21.15562 | 0.175915 | 0.391755 |
| 50.01021 | 1.671427 | 0.979088 | 291.3936 | 54.82211 | 21.15909 | 0.175943 | 0.39212  |
| 50.0715  | 1.6717   | 0.979243 | 291.61   | 54.83084 | 21.16255 | 0.175971 | 0.392485 |
| 50.13279 | 1.671972 | 0.979399 | 291.826  | 54.83957 | 21.16601 | 0.175999 | 0.392849 |
| 50.19408 | 1.672244 | 0.979555 | 292.0418 | 54.84828 | 21.16946 | 0.176027 | 0.393213 |
| 50.25536 | 1.672515 | 0.97971  | 292.2573 | 54.85697 | 21.17291 | 0.176055 | 0.393577 |
| 50.31665 | 1.672786 | 0.979865 | 292.4726 | 54.86566 | 21.17635 | 0.176083 | 0.393941 |
| 50.37794 | 1.673057 | 0.98002  | 292.6875 | 54.87434 | 21.17979 | 0.176111 | 0.394304 |
| 50.43922 | 1.673328 | 0.980174 | 292.9022 | 54.88301 | 21.18323 | 0.176139 | 0.394667 |
| 50.50051 | 1.673598 | 0.980329 | 293.1167 | 54.89167 | 21.18666 | 0.176167 | 0.39503  |
| 50.5618  | 1.673867 | 0.980483 | 293.3309 | 54.90031 | 21.19009 | 0.176194 | 0.395392 |
| 50.62308 | 1.674137 | 0.980637 | 293.5448 | 54.90895 | 21.19351 | 0.176222 | 0.395755 |
| 50.68437 | 1.674406 | 0.980791 | 293.7584 | 54.91757 | 21.19693 | 0.17625  | 0.396116 |
| 50.74566 | 1.674675 | 0.980945 | 293.9718 | 54.92618 | 21.20034 | 0.176278 | 0.396478 |
| 50.80695 | 1.674943 | 0.981099 | 294.1849 | 54.93479 | 21.20375 | 0.176305 | 0.396839 |
| 50.86823 | 1.675212 | 0.981252 | 294.3978 | 54.94338 | 21.20716 | 0.176333 | 0.3972   |
| 50.92952 | 1.675479 | 0.981405 | 294.6104 | 54.95196 | 21.21056 | 0.17636  | 0.397561 |
| 50.99081 | 1.675747 | 0.981558 | 294.8227 | 54.96053 | 21.21396 | 0.176388 | 0.397921 |
| 51.05209 | 1.676014 | 0.981711 | 295.0348 | 54.96909 | 21.21735 | 0.176415 | 0.398282 |
| 51.11338 | 1.676281 | 0.981863 | 295.2466 | 54.97764 | 21.22074 | 0.176443 | 0.398641 |
| 51.17467 | 1.676547 | 0.982016 | 295.4581 | 54.98618 | 21.22412 | 0.17647  | 0.399001 |
| 51.23596 | 1.676813 | 0.982168 | 295.6694 | 54.99471 | 21.2275  | 0.176498 | 0.39936  |
| 51.29724 | 1.677079 | 0.98232  | 295.8804 | 55.00323 | 21.23088 | 0.176525 | 0.399719 |
| 51.35853 | 1.677345 | 0.982472 | 296.0911 | 55.01173 | 21.23425 | 0.176552 | 0.400078 |
| 51.41982 | 1.67761  | 0.982623 | 296.3016 | 55.02023 | 21.23762 | 0.17658  | 0.400437 |
| 51.4811  | 1.677875 | 0.982775 | 296.5118 | 55.02872 | 21.24099 | 0.176607 | 0.400795 |
| 51.54239 | 1.678139 | 0.982926 | 296.7218 | 55.03719 | 21.24435 | 0.176634 | 0.401153 |
| 51.60368 | 1.678404 | 0.983077 | 296.9315 | 55.04566 | 21.2477  | 0.176661 | 0.40151  |
| 51.66496 | 1.678668 | 0.983228 | 297.1409 | 55.05411 | 21.25105 | 0.176689 | 0.401868 |
| 51.72625 | 1.678931 | 0.983379 | 297.3501 | 55.06256 | 21.2544  | 0.176716 | 0.402225 |

|          |          |          |          |          |          |          |          |
|----------|----------|----------|----------|----------|----------|----------|----------|
| 51.78754 | 1.679194 | 0.983529 | 297.5591 | 55.07099 | 21.25775 | 0.176743 | 0.402581 |
| 51.84883 | 1.679457 | 0.98368  | 297.7677 | 55.07942 | 21.26109 | 0.17677  | 0.402938 |
| 51.91011 | 1.67972  | 0.98383  | 297.9761 | 55.08783 | 21.26442 | 0.176797 | 0.403294 |
| 51.9714  | 1.679982 | 0.98398  | 298.1843 | 55.09623 | 21.26775 | 0.176824 | 0.40365  |
| 52.03269 | 1.680244 | 0.98413  | 298.3922 | 55.10462 | 21.27108 | 0.176851 | 0.404005 |
| 52.09397 | 1.680506 | 0.984279 | 298.5998 | 55.11301 | 21.2744  | 0.176878 | 0.404361 |
| 52.15526 | 1.680767 | 0.984429 | 298.8072 | 55.12138 | 21.27772 | 0.176905 | 0.404716 |
| 52.21655 | 1.681028 | 0.984578 | 299.0143 | 55.12974 | 21.28104 | 0.176932 | 0.405071 |
| 52.27783 | 1.681289 | 0.984727 | 299.2211 | 55.13809 | 21.28435 | 0.176958 | 0.405425 |
| 52.33912 | 1.681549 | 0.984876 | 299.4277 | 55.14643 | 21.28765 | 0.176985 | 0.405779 |
| 52.40041 | 1.681809 | 0.985024 | 299.6341 | 55.15476 | 21.29096 | 0.177012 | 0.406133 |
| 52.4617  | 1.682069 | 0.985173 | 299.8401 | 55.16308 | 21.29426 | 0.177039 | 0.406487 |
| 52.52298 | 1.682328 | 0.985321 | 300.046  | 55.17139 | 21.29755 | 0.177065 | 0.40684  |
| 52.58427 | 1.682587 | 0.985469 | 300.2515 | 55.17969 | 21.30084 | 0.177092 | 0.407193 |
| 52.64556 | 1.682846 | 0.985617 | 300.4569 | 55.18798 | 21.30413 | 0.177119 | 0.407546 |
| 52.70684 | 1.683104 | 0.985765 | 300.6619 | 55.19625 | 21.30741 | 0.177145 | 0.407899 |
| 52.76813 | 1.683362 | 0.985913 | 300.8667 | 55.20452 | 21.31069 | 0.177172 | 0.408251 |
| 52.82942 | 1.68362  | 0.98606  | 301.0713 | 55.21278 | 21.31396 | 0.177198 | 0.408603 |
| 52.8907  | 1.683878 | 0.986207 | 301.2756 | 55.22103 | 21.31723 | 0.177225 | 0.408954 |
| 52.95199 | 1.684135 | 0.986354 | 301.4796 | 55.22927 | 21.3205  | 0.177251 | 0.409306 |
| 53.01328 | 1.684391 | 0.986501 | 301.6834 | 55.23749 | 21.32376 | 0.177278 | 0.409657 |
| 53.07457 | 1.684648 | 0.986648 | 301.887  | 55.24571 | 21.32702 | 0.177304 | 0.410008 |
| 53.13585 | 1.684904 | 0.986794 | 302.0903 | 55.25392 | 21.33027 | 0.17733  | 0.410358 |
| 53.19714 | 1.68516  | 0.986941 | 302.2933 | 55.26211 | 21.33352 | 0.177357 | 0.410709 |
| 53.25843 | 1.685416 | 0.987087 | 302.4961 | 55.2703  | 21.33677 | 0.177383 | 0.411059 |
| 53.31971 | 1.685671 | 0.987233 | 302.6986 | 55.27848 | 21.34001 | 0.177409 | 0.411408 |
| 53.381   | 1.685926 | 0.987378 | 302.9009 | 55.28664 | 21.34325 | 0.177436 | 0.411758 |
| 53.44229 | 1.68618  | 0.987524 | 303.1029 | 55.2948  | 21.34648 | 0.177462 | 0.412107 |
| 53.50358 | 1.686435 | 0.987669 | 303.3047 | 55.30294 | 21.34971 | 0.177488 | 0.412456 |
| 53.56486 | 1.686689 | 0.987814 | 303.5062 | 55.31108 | 21.35294 | 0.177514 | 0.412804 |
| 53.62615 | 1.686942 | 0.987959 | 303.7075 | 55.3192  | 21.35616 | 0.17754  | 0.413153 |
| 53.68744 | 1.687196 | 0.988104 | 303.9085 | 55.32732 | 21.35938 | 0.177566 | 0.413501 |
| 53.74872 | 1.687449 | 0.988249 | 304.1093 | 55.33543 | 21.36259 | 0.177592 | 0.413849 |
| 53.81001 | 1.687702 | 0.988393 | 304.3098 | 55.34352 | 21.3658  | 0.177618 | 0.414196 |
| 53.8713  | 1.687954 | 0.988538 | 304.5101 | 55.35161 | 21.36901 | 0.177644 | 0.414543 |
| 53.93258 | 1.688206 | 0.988682 | 304.7101 | 55.35968 | 21.37221 | 0.17767  | 0.41489  |
| 53.99387 | 1.688458 | 0.988826 | 304.9099 | 55.36775 | 21.37541 | 0.177696 | 0.415237 |
| 54.05516 | 1.688709 | 0.98897  | 305.1094 | 55.3758  | 21.37861 | 0.177722 | 0.415583 |
| 54.11645 | 1.688961 | 0.989113 | 305.3087 | 55.38385 | 21.3818  | 0.177748 | 0.415929 |
| 54.17773 | 1.689211 | 0.989257 | 305.5077 | 55.39188 | 21.38498 | 0.177774 | 0.416275 |
| 54.23902 | 1.689462 | 0.9894   | 305.7065 | 55.39991 | 21.38817 | 0.1778   | 0.416621 |
| 54.30031 | 1.689712 | 0.989543 | 305.9051 | 55.40792 | 21.39135 | 0.177825 | 0.416966 |
| 54.36159 | 1.689962 | 0.989686 | 306.1034 | 55.41593 | 21.39452 | 0.177851 | 0.417311 |
| 54.42288 | 1.690212 | 0.989829 | 306.3014 | 55.42393 | 21.39769 | 0.177877 | 0.417656 |
| 54.48417 | 1.690461 | 0.989971 | 306.4992 | 55.43191 | 21.40086 | 0.177902 | 0.418    |
| 54.54545 | 1.69071  | 0.990113 | 306.6968 | 55.43989 | 21.40402 | 0.177928 | 0.418344 |
| 54.60674 | 1.690959 | 0.990256 | 306.8941 | 55.44785 | 21.40718 | 0.177954 | 0.418688 |

|          |          |          |          |          |          |          |          |
|----------|----------|----------|----------|----------|----------|----------|----------|
| 54.66803 | 1.691207 | 0.990398 | 307.0911 | 55.45581 | 21.41034 | 0.177979 | 0.419032 |
| 54.72932 | 1.691455 | 0.990539 | 307.2879 | 55.46375 | 21.41349 | 0.178005 | 0.419375 |
| 54.7906  | 1.691703 | 0.990681 | 307.4845 | 55.47169 | 21.41663 | 0.17803  | 0.419718 |
| 54.85189 | 1.691951 | 0.990822 | 307.6808 | 55.47962 | 21.41978 | 0.178056 | 0.420061 |
| 54.91318 | 1.692198 | 0.990964 | 307.8769 | 55.48753 | 21.42292 | 0.178081 | 0.420404 |
| 54.97446 | 1.692445 | 0.991105 | 308.0728 | 55.49544 | 21.42605 | 0.178106 | 0.420746 |
| 55.03575 | 1.692691 | 0.991246 | 308.2684 | 55.50334 | 21.42919 | 0.178132 | 0.421088 |
| 55.09704 | 1.692938 | 0.991387 | 308.4637 | 55.51122 | 21.43231 | 0.178157 | 0.42143  |
| 55.15832 | 1.693184 | 0.991527 | 308.6588 | 55.5191  | 21.43544 | 0.178183 | 0.421771 |
| 55.21961 | 1.693429 | 0.991668 | 308.8537 | 55.52697 | 21.43856 | 0.178208 | 0.422112 |
| 55.2809  | 1.693675 | 0.991808 | 309.0483 | 55.53482 | 21.44168 | 0.178233 | 0.422453 |
| 55.34219 | 1.69392  | 0.991948 | 309.2427 | 55.54267 | 21.44479 | 0.178258 | 0.422794 |
| 55.40347 | 1.694164 | 0.992088 | 309.4368 | 55.55051 | 21.4479  | 0.178283 | 0.423134 |
| 55.46476 | 1.694409 | 0.992228 | 309.6307 | 55.55834 | 21.451   | 0.178309 | 0.423474 |
| 55.52605 | 1.694653 | 0.992367 | 309.8244 | 55.56616 | 21.4541  | 0.178334 | 0.423814 |
| 55.58733 | 1.694897 | 0.992506 | 310.0178 | 55.57397 | 21.4572  | 0.178359 | 0.424153 |
| 55.64862 | 1.69514  | 0.992646 | 310.211  | 55.58177 | 21.4603  | 0.178384 | 0.424493 |
| 55.70991 | 1.695384 | 0.992785 | 310.404  | 55.58956 | 21.46339 | 0.178409 | 0.424832 |
| 55.7712  | 1.695627 | 0.992924 | 310.5967 | 55.59734 | 21.46647 | 0.178434 | 0.42517  |
| 55.83248 | 1.695869 | 0.993062 | 310.7891 | 55.60511 | 21.46955 | 0.178459 | 0.425509 |
| 55.89377 | 1.696112 | 0.993201 | 310.9814 | 55.61287 | 21.47263 | 0.178484 | 0.425847 |
| 55.95506 | 1.696354 | 0.993339 | 311.1734 | 55.62062 | 21.47571 | 0.178509 | 0.426185 |
| 56.01634 | 1.696596 | 0.993477 | 311.3651 | 55.62836 | 21.47878 | 0.178534 | 0.426522 |
| 56.07763 | 1.696837 | 0.993615 | 311.5567 | 55.6361  | 21.48185 | 0.178558 | 0.42686  |
| 56.13892 | 1.697078 | 0.993753 | 311.7479 | 55.64382 | 21.48491 | 0.178583 | 0.427197 |
| 56.2002  | 1.697319 | 0.993891 | 311.939  | 55.65153 | 21.48797 | 0.178608 | 0.427534 |
| 56.26149 | 1.69756  | 0.994028 | 312.1298 | 55.65924 | 21.49103 | 0.178633 | 0.42787  |
| 56.32278 | 1.6978   | 0.994166 | 312.3204 | 55.66693 | 21.49408 | 0.178657 | 0.428206 |
| 56.38407 | 1.69804  | 0.994303 | 312.5107 | 55.67462 | 21.49713 | 0.178682 | 0.428542 |
| 56.44535 | 1.69828  | 0.99444  | 312.7008 | 55.68229 | 21.50017 | 0.178707 | 0.428878 |
| 56.50664 | 1.698519 | 0.994577 | 312.8907 | 55.68996 | 21.50321 | 0.178731 | 0.429213 |
| 56.56793 | 1.698758 | 0.994713 | 313.0803 | 55.69762 | 21.50625 | 0.178756 | 0.429549 |
| 56.62921 | 1.698997 | 0.99485  | 313.2697 | 55.70526 | 21.50928 | 0.178781 | 0.429883 |
| 56.6905  | 1.699235 | 0.994986 | 313.4589 | 55.7129  | 21.51231 | 0.178805 | 0.430218 |
| 56.75179 | 1.699474 | 0.995122 | 313.6478 | 55.72053 | 21.51534 | 0.17883  | 0.430552 |
| 56.81307 | 1.699712 | 0.995258 | 313.8365 | 55.72815 | 21.51836 | 0.178854 | 0.430887 |
| 56.87436 | 1.699949 | 0.995394 | 314.0249 | 55.73576 | 21.52138 | 0.178879 | 0.43122  |
| 56.93565 | 1.700187 | 0.99553  | 314.2131 | 55.74336 | 21.52439 | 0.178903 | 0.431554 |
| 56.99694 | 1.700424 | 0.995665 | 314.4011 | 55.75095 | 21.52741 | 0.178927 | 0.431887 |
| 57.05822 | 1.70066  | 0.995801 | 314.5889 | 55.75853 | 21.53041 | 0.178952 | 0.43222  |
| 57.11951 | 1.700897 | 0.995936 | 314.7764 | 55.7661  | 21.53342 | 0.178976 | 0.432553 |
| 57.1808  | 1.701133 | 0.996071 | 314.9637 | 55.77366 | 21.53642 | 0.179    | 0.432885 |
| 57.24208 | 1.701369 | 0.996205 | 315.1507 | 55.78122 | 21.53941 | 0.179025 | 0.433218 |
| 57.30337 | 1.701605 | 0.99634  | 315.3376 | 55.78876 | 21.54241 | 0.179049 | 0.43355  |
| 57.36466 | 1.70184  | 0.996475 | 315.5241 | 55.79629 | 21.54539 | 0.179073 | 0.433881 |
| 57.42594 | 1.702075 | 0.996609 | 315.7105 | 55.80382 | 21.54838 | 0.179097 | 0.434213 |
| 57.48723 | 1.70231  | 0.996743 | 315.8966 | 55.81134 | 21.55136 | 0.179121 | 0.434544 |

|          |          |          |          |          |          |          |          |
|----------|----------|----------|----------|----------|----------|----------|----------|
| 57.54852 | 1.702544 | 0.996877 | 316.0825 | 55.81884 | 21.55434 | 0.179146 | 0.434875 |
| 57.60981 | 1.702778 | 0.997011 | 316.2682 | 55.82634 | 21.55731 | 0.17917  | 0.435205 |
| 57.67109 | 1.703012 | 0.997144 | 316.4536 | 55.83383 | 21.56028 | 0.179194 | 0.435536 |
| 57.73238 | 1.703246 | 0.997278 | 316.6388 | 55.8413  | 21.56325 | 0.179218 | 0.435866 |
| 57.79367 | 1.703479 | 0.997411 | 316.8238 | 55.84877 | 21.56621 | 0.179242 | 0.436195 |
| 57.85495 | 1.703712 | 0.997544 | 317.0085 | 55.85623 | 21.56917 | 0.179266 | 0.436525 |
| 57.91624 | 1.703945 | 0.997677 | 317.1931 | 55.86368 | 21.57213 | 0.17929  | 0.436854 |
| 57.97753 | 1.704177 | 0.99781  | 317.3774 | 55.87113 | 21.57508 | 0.179314 | 0.437183 |
| 58.03882 | 1.704409 | 0.997943 | 317.5614 | 55.87856 | 21.57803 | 0.179337 | 0.437512 |
| 58.1001  | 1.704641 | 0.998075 | 317.7452 | 55.88598 | 21.58098 | 0.179361 | 0.437841 |
| 58.16139 | 1.704873 | 0.998208 | 317.9288 | 55.89339 | 21.58392 | 0.179385 | 0.438169 |
| 58.22268 | 1.705104 | 0.99834  | 318.1122 | 55.9008  | 21.58686 | 0.179409 | 0.438497 |
| 58.28396 | 1.705335 | 0.998472 | 318.2954 | 55.90819 | 21.58979 | 0.179433 | 0.438824 |
| 58.34525 | 1.705565 | 0.998604 | 318.4783 | 55.91558 | 21.59272 | 0.179456 | 0.439152 |
| 58.40654 | 1.705796 | 0.998735 | 318.661  | 55.92296 | 21.59565 | 0.17948  | 0.439479 |
| 58.46782 | 1.706026 | 0.998867 | 318.8434 | 55.93033 | 21.59857 | 0.179504 | 0.439806 |
| 58.52911 | 1.706256 | 0.998998 | 319.0257 | 55.93768 | 21.60149 | 0.179527 | 0.440132 |
| 58.5904  | 1.706485 | 0.999129 | 319.2077 | 55.94503 | 21.60441 | 0.179551 | 0.440459 |
| 58.65169 | 1.706715 | 0.99926  | 319.3894 | 55.95238 | 21.60732 | 0.179575 | 0.440785 |
| 58.71297 | 1.706944 | 0.999391 | 319.571  | 55.95971 | 21.61023 | 0.179598 | 0.441111 |
| 58.77426 | 1.707172 | 0.999522 | 319.7523 | 55.96703 | 21.61313 | 0.179622 | 0.441436 |
| 58.83555 | 1.707401 | 0.999652 | 319.9334 | 55.97434 | 21.61603 | 0.179645 | 0.441761 |
| 58.89683 | 1.707629 | 0.999783 | 320.1143 | 55.98165 | 21.61893 | 0.179669 | 0.442087 |
| 58.95812 | 1.707857 | 0.999913 | 320.295  | 55.98894 | 21.62183 | 0.179692 | 0.442411 |
| 59.01941 | 1.708084 | 1.000043 | 320.4754 | 55.99623 | 21.62472 | 0.179716 | 0.442736 |
| 59.08069 | 1.708312 | 1.000173 | 320.6556 | 56.00351 | 21.62761 | 0.179739 | 0.44306  |
| 59.14198 | 1.708539 | 1.000303 | 320.8356 | 56.01077 | 21.63049 | 0.179762 | 0.443384 |
| 59.20327 | 1.708766 | 1.000432 | 321.0154 | 56.01803 | 21.63337 | 0.179786 | 0.443708 |
| 59.26456 | 1.708992 | 1.000562 | 321.1949 | 56.02528 | 21.63625 | 0.179809 | 0.444031 |
| 59.32584 | 1.709218 | 1.000691 | 321.3742 | 56.03252 | 21.63912 | 0.179832 | 0.444354 |
| 59.38713 | 1.709444 | 1.00082  | 321.5533 | 56.03976 | 21.64199 | 0.179855 | 0.444677 |
| 59.44842 | 1.70967  | 1.000949 | 321.7322 | 56.04698 | 21.64486 | 0.179879 | 0.445    |
| 59.5097  | 1.709895 | 1.001078 | 321.9108 | 56.05419 | 21.64772 | 0.179902 | 0.445322 |
| 59.57099 | 1.71012  | 1.001206 | 322.0893 | 56.0614  | 21.65058 | 0.179925 | 0.445644 |
| 59.63228 | 1.710345 | 1.001335 | 322.2675 | 56.0686  | 21.65343 | 0.179948 | 0.445966 |
| 59.69356 | 1.71057  | 1.001463 | 322.4454 | 56.07578 | 21.65629 | 0.179971 | 0.446288 |
| 59.75485 | 1.710794 | 1.001591 | 322.6232 | 56.08296 | 21.65913 | 0.179994 | 0.446609 |
| 59.81614 | 1.711018 | 1.001719 | 322.8007 | 56.09013 | 21.66198 | 0.180017 | 0.44693  |
| 59.87743 | 1.711241 | 1.001847 | 322.9781 | 56.09729 | 21.66482 | 0.18004  | 0.447251 |
| 59.93871 | 1.711465 | 1.001974 | 323.1551 | 56.10444 | 21.66766 | 0.180063 | 0.447572 |
| 60       | 1.711688 | 1.002102 | 323.332  | 56.11159 | 21.67049 | 0.180086 | 0.447892 |
| 60.06129 | 1.711911 | 1.002229 | 323.5087 | 56.11872 | 21.67332 | 0.180109 | 0.448212 |
| 60.12257 | 1.712133 | 1.002356 | 323.6851 | 56.12585 | 21.67615 | 0.180132 | 0.448532 |
| 60.18386 | 1.712356 | 1.002484 | 323.8613 | 56.13296 | 21.67897 | 0.180155 | 0.448852 |
| 60.24515 | 1.712578 | 1.00261  | 324.0373 | 56.14007 | 21.6818  | 0.180178 | 0.449171 |
| 60.30644 | 1.7128   | 1.002737 | 324.2131 | 56.14717 | 21.68461 | 0.1802   | 0.44949  |
| 60.36772 | 1.713021 | 1.002864 | 324.3887 | 56.15426 | 21.68743 | 0.180223 | 0.449809 |

|          |          |          |          |          |          |          |          |
|----------|----------|----------|----------|----------|----------|----------|----------|
| 60.42901 | 1.713242 | 1.00299  | 324.564  | 56.16134 | 21.69024 | 0.180246 | 0.450127 |
| 60.4903  | 1.713463 | 1.003116 | 324.7391 | 56.16841 | 21.69304 | 0.180269 | 0.450445 |
| 60.55158 | 1.713684 | 1.003242 | 324.9141 | 56.17548 | 21.69585 | 0.180291 | 0.450763 |
| 60.61287 | 1.713904 | 1.003368 | 325.0887 | 56.18253 | 21.69865 | 0.180314 | 0.451081 |
| 60.67416 | 1.714124 | 1.003494 | 325.2632 | 56.18958 | 21.70144 | 0.180337 | 0.451398 |
| 60.73544 | 1.714344 | 1.00362  | 325.4375 | 56.19661 | 21.70423 | 0.180359 | 0.451716 |
| 60.79673 | 1.714564 | 1.003745 | 325.6115 | 56.20364 | 21.70702 | 0.180382 | 0.452033 |
| 60.85802 | 1.714783 | 1.00387  | 325.7853 | 56.21066 | 21.70981 | 0.180404 | 0.452349 |
| 60.91931 | 1.715002 | 1.003995 | 325.9589 | 56.21767 | 21.71259 | 0.180427 | 0.452666 |
| 60.98059 | 1.715221 | 1.00412  | 326.1323 | 56.22468 | 21.71537 | 0.180449 | 0.452982 |
| 61.04188 | 1.715439 | 1.004245 | 326.3055 | 56.23167 | 21.71815 | 0.180472 | 0.453298 |
| 61.10317 | 1.715658 | 1.00437  | 326.4785 | 56.23866 | 21.72092 | 0.180494 | 0.453613 |
| 61.16445 | 1.715876 | 1.004494 | 326.6512 | 56.24563 | 21.72369 | 0.180517 | 0.453929 |
| 61.22574 | 1.716093 | 1.004619 | 326.8237 | 56.2526  | 21.72645 | 0.180539 | 0.454244 |
| 61.28703 | 1.716311 | 1.004743 | 326.9961 | 56.25956 | 21.72921 | 0.180562 | 0.454559 |
| 61.34831 | 1.716528 | 1.004867 | 327.1682 | 56.26651 | 21.73197 | 0.180584 | 0.454874 |
| 61.4096  | 1.716745 | 1.004991 | 327.34   | 56.27345 | 21.73473 | 0.180606 | 0.455188 |
| 61.47089 | 1.716961 | 1.005115 | 327.5117 | 56.28038 | 21.73748 | 0.180628 | 0.455502 |
| 61.53218 | 1.717178 | 1.005238 | 327.6832 | 56.28731 | 21.74023 | 0.180651 | 0.455816 |
| 61.59346 | 1.717394 | 1.005362 | 327.8544 | 56.29422 | 21.74297 | 0.180673 | 0.456129 |
| 61.65475 | 1.71761  | 1.005485 | 328.0254 | 56.30113 | 21.74571 | 0.180695 | 0.456443 |
| 61.71604 | 1.717825 | 1.005608 | 328.1963 | 56.30803 | 21.74845 | 0.180717 | 0.456756 |
| 61.77732 | 1.71804  | 1.005731 | 328.3669 | 56.31492 | 21.75119 | 0.180739 | 0.457069 |
| 61.83861 | 1.718255 | 1.005854 | 328.5373 | 56.3218  | 21.75392 | 0.180762 | 0.457381 |
| 61.8999  | 1.71847  | 1.005977 | 328.7074 | 56.32868 | 21.75664 | 0.180784 | 0.457694 |
| 61.96118 | 1.718685 | 1.006099 | 328.8774 | 56.33554 | 21.75937 | 0.180806 | 0.458006 |
| 62.02247 | 1.718899 | 1.006222 | 329.0472 | 56.3424  | 21.76209 | 0.180828 | 0.458318 |
| 62.08376 | 1.719113 | 1.006344 | 329.2167 | 56.34924 | 21.76481 | 0.18085  | 0.458629 |
| 62.14505 | 1.719326 | 1.006466 | 329.386  | 56.35608 | 21.76752 | 0.180872 | 0.45894  |
| 62.20633 | 1.71954  | 1.006588 | 329.5552 | 56.36291 | 21.77023 | 0.180894 | 0.459251 |
| 62.26762 | 1.719753 | 1.00671  | 329.7241 | 56.36974 | 21.77294 | 0.180916 | 0.459562 |
| 62.32891 | 1.719966 | 1.006831 | 329.8928 | 56.37655 | 21.77564 | 0.180937 | 0.459873 |
| 62.39019 | 1.720178 | 1.006953 | 330.0613 | 56.38336 | 21.77835 | 0.180959 | 0.460183 |
| 62.45148 | 1.720391 | 1.007074 | 330.2296 | 56.39015 | 21.78104 | 0.180981 | 0.460493 |
| 62.51277 | 1.720603 | 1.007195 | 330.3977 | 56.39694 | 21.78374 | 0.181003 | 0.460803 |
| 62.57406 | 1.720815 | 1.007316 | 330.5656 | 56.40372 | 21.78643 | 0.181025 | 0.461112 |
| 62.63534 | 1.721026 | 1.007437 | 330.7333 | 56.4105  | 21.78912 | 0.181047 | 0.461422 |
| 62.69663 | 1.721238 | 1.007558 | 330.9008 | 56.41726 | 21.7918  | 0.181068 | 0.461731 |
| 62.75792 | 1.721449 | 1.007678 | 331.068  | 56.42402 | 21.79448 | 0.18109  | 0.462039 |
| 62.8192  | 1.72166  | 1.007799 | 331.2351 | 56.43076 | 21.79716 | 0.181112 | 0.462348 |
| 62.88049 | 1.72187  | 1.007919 | 331.4019 | 56.4375  | 21.79984 | 0.181133 | 0.462656 |
| 62.94178 | 1.722081 | 1.008039 | 331.5686 | 56.44423 | 21.80251 | 0.181155 | 0.462964 |
| 63.00306 | 1.722291 | 1.008159 | 331.735  | 56.45096 | 21.80518 | 0.181177 | 0.463272 |
| 63.06435 | 1.7225   | 1.008279 | 331.9012 | 56.45767 | 21.80784 | 0.181198 | 0.463579 |
| 63.12564 | 1.72271  | 1.008399 | 332.0672 | 56.46437 | 21.8105  | 0.18122  | 0.463887 |
| 63.18693 | 1.722919 | 1.008518 | 332.2331 | 56.47107 | 21.81316 | 0.181241 | 0.464194 |
| 63.24821 | 1.723128 | 1.008638 | 332.3987 | 56.47776 | 21.81582 | 0.181263 | 0.4645   |

|          |          |          |          |          |          |          |          |
|----------|----------|----------|----------|----------|----------|----------|----------|
| 63.3095  | 1.723337 | 1.008757 | 332.5641 | 56.48444 | 21.81847 | 0.181284 | 0.464807 |
| 63.37079 | 1.723546 | 1.008876 | 332.7293 | 56.49111 | 21.82112 | 0.181306 | 0.465113 |
| 63.43207 | 1.723754 | 1.008995 | 332.8943 | 56.49778 | 21.82376 | 0.181327 | 0.465419 |
| 63.49336 | 1.723962 | 1.009114 | 333.0591 | 56.50443 | 21.82641 | 0.181348 | 0.465725 |
| 63.55465 | 1.724169 | 1.009232 | 333.2236 | 56.51108 | 21.82904 | 0.18137  | 0.46603  |
| 63.61593 | 1.724377 | 1.009351 | 333.388  | 56.51772 | 21.83168 | 0.181391 | 0.466336 |
| 63.67722 | 1.724584 | 1.009469 | 333.5522 | 56.52435 | 21.83431 | 0.181412 | 0.466641 |
| 63.73851 | 1.724791 | 1.009587 | 333.7162 | 56.53098 | 21.83694 | 0.181434 | 0.466945 |
| 63.7998  | 1.724998 | 1.009705 | 333.8799 | 56.53759 | 21.83957 | 0.181455 | 0.46725  |
| 63.86108 | 1.725204 | 1.009823 | 334.0435 | 56.5442  | 21.84219 | 0.181476 | 0.467554 |
| 63.92237 | 1.72541  | 1.009941 | 334.2069 | 56.5508  | 21.84481 | 0.181497 | 0.467858 |
| 63.98366 | 1.725616 | 1.010059 | 334.37   | 56.55739 | 21.84742 | 0.181518 | 0.468162 |
| 64.04494 | 1.725822 | 1.010176 | 334.533  | 56.56397 | 21.85004 | 0.18154  | 0.468465 |
| 64.10623 | 1.726028 | 1.010294 | 334.6957 | 56.57054 | 21.85265 | 0.181561 | 0.468768 |
| 64.16752 | 1.726233 | 1.010411 | 334.8583 | 56.57711 | 21.85525 | 0.181582 | 0.469071 |
| 64.2288  | 1.726438 | 1.010528 | 335.0206 | 56.58366 | 21.85786 | 0.181603 | 0.469374 |
| 64.29009 | 1.726642 | 1.010645 | 335.1828 | 56.59021 | 21.86046 | 0.181624 | 0.469677 |
| 64.35138 | 1.726847 | 1.010761 | 335.3447 | 56.59676 | 21.86305 | 0.181645 | 0.469979 |
| 64.41267 | 1.727051 | 1.010878 | 335.5065 | 56.60329 | 21.86565 | 0.181666 | 0.470281 |
| 64.47395 | 1.727255 | 1.010995 | 335.668  | 56.60981 | 21.86824 | 0.181687 | 0.470583 |
| 64.53524 | 1.727458 | 1.011111 | 335.8293 | 56.61633 | 21.87082 | 0.181708 | 0.470884 |
| 64.59653 | 1.727662 | 1.011227 | 335.9905 | 56.62284 | 21.87341 | 0.181729 | 0.471185 |
| 64.65781 | 1.727865 | 1.011343 | 336.1514 | 56.62934 | 21.87599 | 0.18175  | 0.471486 |
| 64.7191  | 1.728068 | 1.011459 | 336.3122 | 56.63583 | 21.87857 | 0.181771 | 0.471787 |
| 64.78039 | 1.728271 | 1.011575 | 336.4727 | 56.64232 | 21.88114 | 0.181791 | 0.472087 |
| 64.84168 | 1.728473 | 1.01169  | 336.6331 | 56.6488  | 21.88371 | 0.181812 | 0.472388 |
| 64.90296 | 1.728675 | 1.011806 | 336.7932 | 56.65526 | 21.88628 | 0.181833 | 0.472688 |
| 64.96425 | 1.728877 | 1.011921 | 336.9531 | 56.66172 | 21.88885 | 0.181854 | 0.472987 |
| 65.02554 | 1.729079 | 1.012036 | 337.1129 | 56.66818 | 21.89141 | 0.181874 | 0.473287 |
| 65.08682 | 1.72928  | 1.012151 | 337.2724 | 56.67462 | 21.89397 | 0.181895 | 0.473586 |
| 65.14811 | 1.729481 | 1.012266 | 337.4318 | 56.68106 | 21.89652 | 0.181916 | 0.473885 |
| 65.2094  | 1.729682 | 1.012381 | 337.5909 | 56.68749 | 21.89907 | 0.181936 | 0.474184 |
| 65.27068 | 1.729883 | 1.012496 | 337.7499 | 56.69391 | 21.90162 | 0.181957 | 0.474483 |
| 65.33197 | 1.730083 | 1.01261  | 337.9087 | 56.70032 | 21.90417 | 0.181978 | 0.474781 |
| 65.39326 | 1.730283 | 1.012724 | 338.0672 | 56.70673 | 21.90671 | 0.181998 | 0.475079 |
| 65.45455 | 1.730483 | 1.012839 | 338.2256 | 56.71312 | 21.90925 | 0.182019 | 0.475377 |
| 65.51583 | 1.730683 | 1.012953 | 338.3837 | 56.71951 | 21.91179 | 0.182039 | 0.475674 |
| 65.57712 | 1.730882 | 1.013066 | 338.5417 | 56.72589 | 21.91432 | 0.18206  | 0.475971 |
| 65.63841 | 1.731082 | 1.01318  | 338.6995 | 56.73227 | 21.91685 | 0.18208  | 0.476269 |
| 65.69969 | 1.731281 | 1.013294 | 338.8571 | 56.73863 | 21.91938 | 0.182101 | 0.476565 |
| 65.76098 | 1.731479 | 1.013407 | 339.0144 | 56.74499 | 21.9219  | 0.182121 | 0.476862 |
| 65.82227 | 1.731678 | 1.013521 | 339.1716 | 56.75134 | 21.92442 | 0.182142 | 0.477158 |
| 65.88355 | 1.731876 | 1.013634 | 339.3286 | 56.75768 | 21.92694 | 0.182162 | 0.477454 |
| 65.94484 | 1.732074 | 1.013747 | 339.4854 | 56.76401 | 21.92946 | 0.182182 | 0.47775  |
| 66.00613 | 1.732272 | 1.01386  | 339.642  | 56.77034 | 21.93197 | 0.182203 | 0.478046 |
| 66.06742 | 1.732469 | 1.013973 | 339.7984 | 56.77666 | 21.93448 | 0.182223 | 0.478341 |
| 66.1287  | 1.732666 | 1.014085 | 339.9546 | 56.78297 | 21.93698 | 0.182243 | 0.478636 |

|          |          |          |          |          |          |          |          |
|----------|----------|----------|----------|----------|----------|----------|----------|
| 66.18999 | 1.732863 | 1.014198 | 340.1106 | 56.78927 | 21.93948 | 0.182264 | 0.478931 |
| 66.25128 | 1.73306  | 1.01431  | 340.2665 | 56.79557 | 21.94198 | 0.182284 | 0.479226 |
| 66.31256 | 1.733256 | 1.014422 | 340.4221 | 56.80185 | 21.94448 | 0.182304 | 0.47952  |
| 66.37385 | 1.733453 | 1.014534 | 340.5775 | 56.80813 | 21.94697 | 0.182324 | 0.479814 |
| 66.43514 | 1.733649 | 1.014646 | 340.7328 | 56.8144  | 21.94946 | 0.182344 | 0.480108 |
| 66.49642 | 1.733844 | 1.014758 | 340.8878 | 56.82067 | 21.95195 | 0.182364 | 0.480402 |
| 66.55771 | 1.73404  | 1.01487  | 341.0427 | 56.82692 | 21.95443 | 0.182384 | 0.480695 |
| 66.619   | 1.734235 | 1.014981 | 341.1973 | 56.83317 | 21.95691 | 0.182405 | 0.480988 |
| 66.68029 | 1.73443  | 1.015093 | 341.3518 | 56.83941 | 21.95939 | 0.182425 | 0.481281 |
| 66.74157 | 1.734625 | 1.015204 | 341.5061 | 56.84564 | 21.96186 | 0.182445 | 0.481574 |
| 66.80286 | 1.73482  | 1.015315 | 341.6602 | 56.85187 | 21.96434 | 0.182465 | 0.481866 |
| 66.86415 | 1.735014 | 1.015426 | 341.8141 | 56.85808 | 21.9668  | 0.182485 | 0.482158 |
| 66.92543 | 1.735208 | 1.015537 | 341.9678 | 56.86429 | 21.96927 | 0.182505 | 0.48245  |
| 66.98672 | 1.735402 | 1.015647 | 342.1213 | 56.87049 | 21.97173 | 0.182524 | 0.482742 |
| 67.04801 | 1.735596 | 1.015758 | 342.2746 | 56.87669 | 21.97419 | 0.182544 | 0.483033 |
| 67.1093  | 1.735789 | 1.015868 | 342.4277 | 56.88287 | 21.97665 | 0.182564 | 0.483325 |
| 67.17058 | 1.735982 | 1.015979 | 342.5807 | 56.88905 | 21.9791  | 0.182584 | 0.483616 |
| 67.23187 | 1.736175 | 1.016089 | 342.7334 | 56.89522 | 21.98155 | 0.182604 | 0.483906 |
| 67.29316 | 1.736367 | 1.016199 | 342.886  | 56.90139 | 21.984   | 0.182624 | 0.484197 |
| 67.35444 | 1.73656  | 1.016309 | 343.0384 | 56.90754 | 21.98644 | 0.182644 | 0.484487 |
| 67.41573 | 1.736752 | 1.016418 | 343.1906 | 56.91369 | 21.98888 | 0.182663 | 0.484777 |
| 67.47702 | 1.736944 | 1.016528 | 343.3425 | 56.91983 | 21.99132 | 0.182683 | 0.485067 |
| 67.5383  | 1.737136 | 1.016637 | 343.4943 | 56.92596 | 21.99376 | 0.182703 | 0.485356 |
| 67.59959 | 1.737327 | 1.016747 | 343.646  | 56.93209 | 21.99619 | 0.182722 | 0.485646 |
| 67.66088 | 1.737518 | 1.016856 | 343.7974 | 56.9382  | 21.99862 | 0.182742 | 0.485935 |
| 67.72217 | 1.737709 | 1.016965 | 343.9486 | 56.94431 | 22.00104 | 0.182762 | 0.486223 |
| 67.78345 | 1.7379   | 1.017074 | 344.0997 | 56.95042 | 22.00347 | 0.182781 | 0.486512 |
| 67.84474 | 1.738091 | 1.017183 | 344.2505 | 56.95651 | 22.00589 | 0.182801 | 0.4868   |
| 67.90603 | 1.738281 | 1.017291 | 344.4012 | 56.9626  | 22.0083  | 0.18282  | 0.487088 |
| 67.96731 | 1.738471 | 1.0174   | 344.5517 | 56.96868 | 22.01072 | 0.18284  | 0.487376 |
| 68.0286  | 1.738661 | 1.017508 | 344.702  | 56.97475 | 22.01313 | 0.182859 | 0.487664 |
| 68.08989 | 1.73885  | 1.017616 | 344.8521 | 56.98081 | 22.01554 | 0.182879 | 0.487951 |
| 68.15117 | 1.73904  | 1.017725 | 345.002  | 56.98687 | 22.01794 | 0.182898 | 0.488238 |
| 68.21246 | 1.739229 | 1.017833 | 345.1518 | 56.99292 | 22.02034 | 0.182918 | 0.488525 |
| 68.27375 | 1.739417 | 1.01794  | 345.3013 | 56.99896 | 22.02274 | 0.182937 | 0.488812 |
| 68.33504 | 1.739606 | 1.018048 | 345.4507 | 57.005   | 22.02514 | 0.182957 | 0.489098 |
| 68.39632 | 1.739794 | 1.018156 | 345.5999 | 57.01102 | 22.02753 | 0.182976 | 0.489385 |
| 68.45761 | 1.739983 | 1.018263 | 345.7488 | 57.01704 | 22.02992 | 0.182995 | 0.48967  |
| 68.5189  | 1.740171 | 1.01837  | 345.8977 | 57.02305 | 22.03231 | 0.183015 | 0.489956 |
| 68.58018 | 1.740358 | 1.018478 | 346.0463 | 57.02906 | 22.0347  | 0.183034 | 0.490242 |
| 68.64147 | 1.740546 | 1.018585 | 346.1947 | 57.03506 | 22.03708 | 0.183053 | 0.490527 |
| 68.70276 | 1.740733 | 1.018692 | 346.343  | 57.04105 | 22.03946 | 0.183072 | 0.490812 |
| 68.76404 | 1.74092  | 1.018798 | 346.491  | 57.04703 | 22.04183 | 0.183092 | 0.491097 |
| 68.82533 | 1.741107 | 1.018905 | 346.6389 | 57.053   | 22.0442  | 0.183111 | 0.491381 |
| 68.88662 | 1.741293 | 1.019011 | 346.7866 | 57.05897 | 22.04657 | 0.18313  | 0.491665 |
| 68.94791 | 1.74148  | 1.019118 | 346.9341 | 57.06493 | 22.04894 | 0.183149 | 0.49195  |
| 69.00919 | 1.741666 | 1.019224 | 347.0815 | 57.07088 | 22.0513  | 0.183168 | 0.492233 |



|          |          |          |          |          |          |          |          |
|----------|----------|----------|----------|----------|----------|----------|----------|
| 69.07048 | 1.741852 | 1.01933  | 347.2286 | 57.07683 | 22.05366 | 0.183187 | 0.492517 |
| 69.13177 | 1.742037 | 1.019436 | 347.3756 | 57.08277 | 22.05602 | 0.183206 | 0.4928   |
| 69.19305 | 1.742223 | 1.019542 | 347.5224 | 57.0887  | 22.05838 | 0.183226 | 0.493083 |
| 69.25434 | 1.742408 | 1.019648 | 347.6691 | 57.09462 | 22.06073 | 0.183245 | 0.493366 |
| 69.31563 | 1.742593 | 1.019753 | 347.8155 | 57.10054 | 22.06308 | 0.183264 | 0.493649 |
| 69.37692 | 1.742777 | 1.019859 | 347.9617 | 57.10645 | 22.06543 | 0.183283 | 0.493931 |
| 69.4382  | 1.742962 | 1.019964 | 348.1078 | 57.11235 | 22.06777 | 0.183302 | 0.494213 |
| 69.49949 | 1.743146 | 1.020069 | 348.2537 | 57.11824 | 22.07011 | 0.18332  | 0.494495 |
| 69.56078 | 1.74333  | 1.020174 | 348.3994 | 57.12413 | 22.07245 | 0.183339 | 0.494777 |
| 69.62206 | 1.743514 | 1.020279 | 348.545  | 57.13001 | 22.07478 | 0.183358 | 0.495058 |
| 69.68335 | 1.743698 | 1.020384 | 348.6903 | 57.13588 | 22.07712 | 0.183377 | 0.49534  |
| 69.74464 | 1.743881 | 1.020489 | 348.8355 | 57.14175 | 22.07945 | 0.183396 | 0.495621 |
| 69.80592 | 1.744064 | 1.020593 | 348.9805 | 57.1476  | 22.08177 | 0.183415 | 0.495901 |
| 69.86721 | 1.744247 | 1.020698 | 349.1253 | 57.15345 | 22.0841  | 0.183434 | 0.496182 |
| 69.9285  | 1.74443  | 1.020802 | 349.2699 | 57.1593  | 22.08642 | 0.183452 | 0.496462 |
| 69.98979 | 1.744612 | 1.020906 | 349.4143 | 57.16513 | 22.08873 | 0.183471 | 0.496742 |
| 70.05107 | 1.744794 | 1.02101  | 349.5586 | 57.17096 | 22.09105 | 0.18349  | 0.497022 |
| 70.11236 | 1.744976 | 1.021114 | 349.7027 | 57.17678 | 22.09336 | 0.183509 | 0.497302 |
| 70.17365 | 1.745158 | 1.021218 | 349.8466 | 57.1826  | 22.09567 | 0.183527 | 0.497581 |
| 70.23493 | 1.74534  | 1.021322 | 349.9904 | 57.18841 | 22.09798 | 0.183546 | 0.49786  |
| 70.29622 | 1.745521 | 1.021425 | 350.1339 | 57.19421 | 22.10028 | 0.183565 | 0.498139 |
| 70.35751 | 1.745702 | 1.021529 | 350.2773 | 57.2     | 22.10258 | 0.183583 | 0.498418 |
| 70.41879 | 1.745883 | 1.021632 | 350.4205 | 57.20578 | 22.10488 | 0.183602 | 0.498696 |
| 70.48008 | 1.746064 | 1.021735 | 350.5635 | 57.21156 | 22.10717 | 0.18362  | 0.498974 |
| 70.54137 | 1.746244 | 1.021838 | 350.7063 | 57.21733 | 22.10947 | 0.183639 | 0.499252 |
| 70.60266 | 1.746424 | 1.021941 | 350.849  | 57.2231  | 22.11176 | 0.183657 | 0.49953  |
| 70.66394 | 1.746604 | 1.022044 | 350.9915 | 57.22886 | 22.11404 | 0.183676 | 0.499807 |
| 70.72523 | 1.746784 | 1.022146 | 351.1338 | 57.23461 | 22.11633 | 0.183694 | 0.500085 |
| 70.78652 | 1.746964 | 1.022249 | 351.2759 | 57.24035 | 22.11861 | 0.183713 | 0.500362 |
| 70.8478  | 1.747143 | 1.022351 | 351.4179 | 57.24608 | 22.12089 | 0.183731 | 0.500638 |
| 70.90909 | 1.747322 | 1.022453 | 351.5597 | 57.25181 | 22.12316 | 0.18375  | 0.500915 |
| 70.97038 | 1.747501 | 1.022556 | 351.7013 | 57.25753 | 22.12543 | 0.183768 | 0.501191 |
| 71.03166 | 1.74768  | 1.022658 | 351.8427 | 57.26325 | 22.1277  | 0.183786 | 0.501467 |
| 71.09295 | 1.747858 | 1.022759 | 351.984  | 57.26896 | 22.12997 | 0.183805 | 0.501743 |
| 71.15424 | 1.748036 | 1.022861 | 352.1251 | 57.27466 | 22.13223 | 0.183823 | 0.502019 |
| 71.21553 | 1.748214 | 1.022963 | 352.266  | 57.28035 | 22.13449 | 0.183841 | 0.502294 |
| 71.27681 | 1.748392 | 1.023064 | 352.4067 | 57.28604 | 22.13675 | 0.18386  | 0.502569 |
| 71.3381  | 1.74857  | 1.023166 | 352.5472 | 57.29171 | 22.13901 | 0.183878 | 0.502844 |
| 71.39939 | 1.748747 | 1.023267 | 352.6876 | 57.29739 | 22.14126 | 0.183896 | 0.503119 |
| 71.46067 | 1.748924 | 1.023368 | 352.8278 | 57.30305 | 22.14351 | 0.183914 | 0.503394 |
| 71.52196 | 1.749101 | 1.023469 | 352.9679 | 57.30871 | 22.14576 | 0.183932 | 0.503668 |
| 71.58325 | 1.749278 | 1.02357  | 353.1077 | 57.31436 | 22.148   | 0.183951 | 0.503942 |
| 71.64454 | 1.749454 | 1.023671 | 353.2474 | 57.32    | 22.15025 | 0.183969 | 0.504216 |
| 71.70582 | 1.74963  | 1.023771 | 353.3869 | 57.32564 | 22.15248 | 0.183987 | 0.504489 |
| 71.76711 | 1.749806 | 1.023872 | 353.5262 | 57.33127 | 22.15472 | 0.184005 | 0.504763 |
| 71.8284  | 1.749982 | 1.023972 | 353.6654 | 57.33689 | 22.15695 | 0.184023 | 0.505036 |
| 71.88968 | 1.750158 | 1.024072 | 353.8044 | 57.34251 | 22.15919 | 0.184041 | 0.505309 |

|          |          |          |          |          |          |          |          |
|----------|----------|----------|----------|----------|----------|----------|----------|
| 71.95097 | 1.750333 | 1.024172 | 353.9432 | 57.34812 | 22.16141 | 0.184059 | 0.505581 |
| 72.01226 | 1.750508 | 1.024272 | 354.0818 | 57.35372 | 22.16364 | 0.184077 | 0.505854 |
| 72.07354 | 1.750683 | 1.024372 | 354.2203 | 57.35932 | 22.16586 | 0.184095 | 0.506126 |
| 72.13483 | 1.750858 | 1.024472 | 354.3586 | 57.3649  | 22.16808 | 0.184113 | 0.506398 |
| 72.19612 | 1.751033 | 1.024572 | 354.4968 | 57.37049 | 22.1703  | 0.184131 | 0.506669 |
| 72.25741 | 1.751207 | 1.024671 | 354.6347 | 57.37606 | 22.17251 | 0.184149 | 0.506941 |
| 72.31869 | 1.751381 | 1.024771 | 354.7725 | 57.38163 | 22.17472 | 0.184167 | 0.507212 |
| 72.37998 | 1.751555 | 1.02487  | 354.9101 | 57.38719 | 22.17693 | 0.184185 | 0.507483 |
| 72.44127 | 1.751728 | 1.024969 | 355.0475 | 57.39274 | 22.17914 | 0.184202 | 0.507754 |
| 72.50255 | 1.751902 | 1.025068 | 355.1848 | 57.39829 | 22.18134 | 0.18422  | 0.508025 |
| 72.56384 | 1.752075 | 1.025167 | 355.3219 | 57.40383 | 22.18354 | 0.184238 | 0.508295 |
| 72.62513 | 1.752248 | 1.025266 | 355.4589 | 57.40936 | 22.18574 | 0.184256 | 0.508565 |
| 72.68641 | 1.752421 | 1.025364 | 355.5956 | 57.41489 | 22.18793 | 0.184274 | 0.508835 |
| 72.7477  | 1.752593 | 1.025463 | 355.7322 | 57.42041 | 22.19013 | 0.184291 | 0.509105 |
| 72.80899 | 1.752766 | 1.025561 | 355.8686 | 57.42592 | 22.19232 | 0.184309 | 0.509374 |
| 72.87028 | 1.752938 | 1.025659 | 356.0049 | 57.43142 | 22.1945  | 0.184327 | 0.509644 |
| 72.93156 | 1.75311  | 1.025758 | 356.141  | 57.43692 | 22.19669 | 0.184344 | 0.509913 |
| 72.99285 | 1.753282 | 1.025856 | 356.2769 | 57.44241 | 22.19887 | 0.184362 | 0.510181 |
| 73.05414 | 1.753453 | 1.025953 | 356.4126 | 57.4479  | 22.20105 | 0.18438  | 0.51045  |
| 73.11542 | 1.753625 | 1.026051 | 356.5482 | 57.45338 | 22.20323 | 0.184397 | 0.510718 |
| 73.17671 | 1.753796 | 1.026149 | 356.6836 | 57.45885 | 22.2054  | 0.184415 | 0.510986 |
| 73.238   | 1.753966 | 1.026246 | 356.8188 | 57.46431 | 22.20757 | 0.184432 | 0.511254 |
| 73.29928 | 1.754137 | 1.026344 | 356.9539 | 57.46977 | 22.20974 | 0.18445  | 0.511522 |
| 73.36057 | 1.754308 | 1.026441 | 357.0888 | 57.47522 | 22.2119  | 0.184467 | 0.511789 |
| 73.42186 | 1.754478 | 1.026538 | 357.2235 | 57.48067 | 22.21407 | 0.184485 | 0.512057 |
| 73.48315 | 1.754648 | 1.026635 | 357.3581 | 57.48611 | 22.21623 | 0.184502 | 0.512324 |
| 73.54443 | 1.754818 | 1.026732 | 357.4925 | 57.49154 | 22.21838 | 0.18452  | 0.51259  |
| 73.60572 | 1.754987 | 1.026829 | 357.6267 | 57.49696 | 22.22054 | 0.184537 | 0.512857 |
| 73.66701 | 1.755157 | 1.026926 | 357.7608 | 57.50238 | 22.22269 | 0.184555 | 0.513123 |
| 73.72829 | 1.755326 | 1.027022 | 357.8947 | 57.50779 | 22.22484 | 0.184572 | 0.513389 |
| 73.78958 | 1.755495 | 1.027119 | 358.0284 | 57.51319 | 22.22699 | 0.184589 | 0.513655 |
| 73.85087 | 1.755664 | 1.027215 | 358.162  | 57.51859 | 22.22913 | 0.184607 | 0.513921 |
| 73.91216 | 1.755832 | 1.027311 | 358.2954 | 57.52398 | 22.23127 | 0.184624 | 0.514186 |
| 73.97344 | 1.756001 | 1.027408 | 358.4286 | 57.52936 | 22.23341 | 0.184641 | 0.514451 |
| 74.03473 | 1.756169 | 1.027503 | 358.5617 | 57.53474 | 22.23555 | 0.184659 | 0.514716 |
| 74.09602 | 1.756337 | 1.027599 | 358.6946 | 57.54011 | 22.23768 | 0.184676 | 0.514981 |
| 74.1573  | 1.756505 | 1.027695 | 358.8274 | 57.54548 | 22.23981 | 0.184693 | 0.515246 |
| 74.21859 | 1.756672 | 1.027791 | 358.9599 | 57.55083 | 22.24194 | 0.18471  | 0.51551  |
| 74.27988 | 1.756839 | 1.027886 | 359.0923 | 57.55618 | 22.24407 | 0.184728 | 0.515774 |
| 74.34116 | 1.757006 | 1.027982 | 359.2246 | 57.56153 | 22.24619 | 0.184745 | 0.516038 |
| 74.40245 | 1.757173 | 1.028077 | 359.3567 | 57.56686 | 22.24831 | 0.184762 | 0.516301 |
| 74.46374 | 1.75734  | 1.028172 | 359.4886 | 57.57219 | 22.25043 | 0.184779 | 0.516565 |
| 74.52503 | 1.757507 | 1.028267 | 359.6203 | 57.57752 | 22.25254 | 0.184796 | 0.516828 |
| 74.58631 | 1.757673 | 1.028362 | 359.7519 | 57.58284 | 22.25466 | 0.184813 | 0.517091 |
| 74.6476  | 1.757839 | 1.028457 | 359.8833 | 57.58815 | 22.25677 | 0.18483  | 0.517354 |
| 74.70889 | 1.758005 | 1.028551 | 360.0146 | 57.59345 | 22.25887 | 0.184847 | 0.517616 |
| 74.77017 | 1.758171 | 1.028646 | 360.1457 | 57.59875 | 22.26098 | 0.184864 | 0.517879 |

|          |          |          |          |          |          |          |          |
|----------|----------|----------|----------|----------|----------|----------|----------|
| 74.83146 | 1.758336 | 1.02874  | 360.2766 | 57.60404 | 22.26308 | 0.184881 | 0.518141 |
| 74.89275 | 1.758501 | 1.028835 | 360.4074 | 57.60932 | 22.26518 | 0.184898 | 0.518403 |
| 74.95403 | 1.758666 | 1.028929 | 360.538  | 57.6146  | 22.26728 | 0.184915 | 0.518664 |
| 75.01532 | 1.758831 | 1.029023 | 360.6684 | 57.61987 | 22.26937 | 0.184932 | 0.518926 |
| 75.07661 | 1.758996 | 1.029117 | 360.7987 | 57.62514 | 22.27146 | 0.184949 | 0.519187 |
| 75.1379  | 1.75916  | 1.029211 | 360.9288 | 57.6304  | 22.27355 | 0.184966 | 0.519448 |
| 75.19918 | 1.759325 | 1.029305 | 361.0588 | 57.63565 | 22.27564 | 0.184983 | 0.519709 |
| 75.26047 | 1.759489 | 1.029398 | 361.1886 | 57.64089 | 22.27772 | 0.185    | 0.519969 |
| 75.32176 | 1.759652 | 1.029492 | 361.3182 | 57.64613 | 22.2798  | 0.185017 | 0.520229 |
| 75.38304 | 1.759816 | 1.029585 | 361.4477 | 57.65136 | 22.28188 | 0.185033 | 0.520489 |
| 75.44433 | 1.759979 | 1.029678 | 361.577  | 57.65659 | 22.28396 | 0.18505  | 0.520749 |
| 75.50562 | 1.760143 | 1.029772 | 361.7062 | 57.66181 | 22.28603 | 0.185067 | 0.521009 |
| 75.56691 | 1.760306 | 1.029865 | 361.8352 | 57.66702 | 22.2881  | 0.185084 | 0.521268 |
| 75.62819 | 1.760469 | 1.029958 | 361.964  | 57.67223 | 22.29017 | 0.1851   | 0.521528 |
| 75.68948 | 1.760631 | 1.03005  | 362.0927 | 57.67743 | 22.29224 | 0.185117 | 0.521787 |
| 75.75077 | 1.760794 | 1.030143 | 362.2212 | 57.68262 | 22.2943  | 0.185134 | 0.522045 |
| 75.81205 | 1.760956 | 1.030236 | 362.3496 | 57.68781 | 22.29636 | 0.18515  | 0.522304 |
| 75.87334 | 1.761118 | 1.030328 | 362.4778 | 57.69299 | 22.29842 | 0.185167 | 0.522562 |
| 75.93463 | 1.76128  | 1.03042  | 362.6058 | 57.69816 | 22.30048 | 0.185184 | 0.52282  |
| 75.99591 | 1.761441 | 1.030513 | 362.7337 | 57.70333 | 22.30253 | 0.1852   | 0.523078 |
| 76.0572  | 1.761603 | 1.030605 | 362.8614 | 57.70849 | 22.30458 | 0.185217 | 0.523336 |
| 76.11849 | 1.761764 | 1.030697 | 362.989  | 57.71365 | 22.30663 | 0.185233 | 0.523594 |
| 76.17978 | 1.761925 | 1.030789 | 363.1164 | 57.7188  | 22.30868 | 0.18525  | 0.523851 |
| 76.24106 | 1.762086 | 1.030881 | 363.2437 | 57.72394 | 22.31072 | 0.185267 | 0.524108 |
| 76.30235 | 1.762247 | 1.030972 | 363.3708 | 57.72908 | 22.31276 | 0.185283 | 0.524365 |
| 76.36364 | 1.762407 | 1.031064 | 363.4977 | 57.73421 | 22.3148  | 0.1853   | 0.524621 |
| 76.42492 | 1.762567 | 1.031155 | 363.6245 | 57.73933 | 22.31683 | 0.185316 | 0.524878 |
| 76.48621 | 1.762727 | 1.031247 | 363.7511 | 57.74445 | 22.31887 | 0.185332 | 0.525134 |
| 76.5475  | 1.762887 | 1.031338 | 363.8776 | 57.74956 | 22.3209  | 0.185349 | 0.52539  |
| 76.60878 | 1.763047 | 1.031429 | 364.0039 | 57.75466 | 22.32293 | 0.185365 | 0.525645 |
| 76.67007 | 1.763206 | 1.03152  | 364.13   | 57.75976 | 22.32495 | 0.185382 | 0.525901 |
| 76.73136 | 1.763366 | 1.031611 | 364.256  | 57.76485 | 22.32698 | 0.185398 | 0.526156 |
| 76.79265 | 1.763525 | 1.031702 | 364.3819 | 57.76994 | 22.329   | 0.185414 | 0.526411 |
| 76.85393 | 1.763683 | 1.031792 | 364.5075 | 57.77502 | 22.33101 | 0.185431 | 0.526666 |
| 76.91522 | 1.763842 | 1.031883 | 364.6331 | 57.78009 | 22.33303 | 0.185447 | 0.526921 |
| 76.97651 | 1.764001 | 1.031973 | 364.7584 | 57.78516 | 22.33504 | 0.185463 | 0.527175 |
| 77.03779 | 1.764159 | 1.032064 | 364.8836 | 57.79022 | 22.33705 | 0.185479 | 0.527429 |
| 77.09908 | 1.764317 | 1.032154 | 365.0087 | 57.79527 | 22.33906 | 0.185496 | 0.527683 |
| 77.16037 | 1.764475 | 1.032244 | 365.1336 | 57.80032 | 22.34107 | 0.185512 | 0.527937 |
| 77.22165 | 1.764633 | 1.032334 | 365.2583 | 57.80536 | 22.34307 | 0.185528 | 0.528191 |
| 77.28294 | 1.76479  | 1.032424 | 365.3829 | 57.8104  | 22.34507 | 0.185544 | 0.528444 |
| 77.34423 | 1.764947 | 1.032513 | 365.5074 | 57.81542 | 22.34707 | 0.18556  | 0.528697 |
| 77.40552 | 1.765104 | 1.032603 | 365.6317 | 57.82045 | 22.34907 | 0.185577 | 0.52895  |
| 77.4668  | 1.765261 | 1.032693 | 365.7558 | 57.82546 | 22.35106 | 0.185593 | 0.529203 |
| 77.52809 | 1.765418 | 1.032782 | 365.8798 | 57.83047 | 22.35305 | 0.185609 | 0.529455 |
| 77.58938 | 1.765575 | 1.032871 | 366.0036 | 57.83548 | 22.35504 | 0.185625 | 0.529708 |
| 77.65066 | 1.765731 | 1.032961 | 366.1273 | 57.84048 | 22.35703 | 0.185641 | 0.52996  |

|          |          |          |          |          |          |          |          |
|----------|----------|----------|----------|----------|----------|----------|----------|
| 77.71195 | 1.765887 | 1.03305  | 366.2508 | 57.84547 | 22.35901 | 0.185657 | 0.530212 |
| 77.77324 | 1.766043 | 1.033139 | 366.3741 | 57.85045 | 22.36099 | 0.185673 | 0.530463 |
| 77.83453 | 1.766199 | 1.033228 | 366.4973 | 57.85543 | 22.36297 | 0.185689 | 0.530715 |
| 77.89581 | 1.766354 | 1.033316 | 366.6204 | 57.86041 | 22.36495 | 0.185705 | 0.530966 |
| 77.9571  | 1.76651  | 1.033405 | 366.7433 | 57.86537 | 22.36692 | 0.185721 | 0.531217 |
| 78.01839 | 1.766665 | 1.033494 | 366.866  | 57.87033 | 22.36889 | 0.185737 | 0.531468 |
| 78.07967 | 1.76682  | 1.033582 | 366.9886 | 57.87529 | 22.37086 | 0.185753 | 0.531718 |
| 78.14096 | 1.766975 | 1.03367  | 367.1111 | 57.88024 | 22.37283 | 0.185769 | 0.531969 |
| 78.20225 | 1.767129 | 1.033759 | 367.2334 | 57.88518 | 22.37479 | 0.185785 | 0.532219 |
| 78.26353 | 1.767284 | 1.033847 | 367.3555 | 57.89012 | 22.37675 | 0.1858   | 0.532469 |
| 78.32482 | 1.767438 | 1.033935 | 367.4775 | 57.89505 | 22.37871 | 0.185816 | 0.532718 |
| 78.38611 | 1.767592 | 1.034023 | 367.5993 | 57.89997 | 22.38067 | 0.185832 | 0.532968 |
| 78.4474  | 1.767746 | 1.03411  | 367.721  | 57.90489 | 22.38262 | 0.185848 | 0.533217 |
| 78.50868 | 1.767899 | 1.034198 | 367.8426 | 57.9098  | 22.38457 | 0.185864 | 0.533466 |
| 78.56997 | 1.768053 | 1.034286 | 367.9639 | 57.91471 | 22.38652 | 0.185879 | 0.533715 |
| 78.63126 | 1.768206 | 1.034373 | 368.0852 | 57.91961 | 22.38847 | 0.185895 | 0.533964 |
| 78.69254 | 1.768359 | 1.03446  | 368.2063 | 57.9245  | 22.39042 | 0.185911 | 0.534212 |
| 78.75383 | 1.768512 | 1.034548 | 368.3272 | 57.92939 | 22.39236 | 0.185927 | 0.534461 |
| 78.81512 | 1.768665 | 1.034635 | 368.448  | 57.93427 | 22.3943  | 0.185942 | 0.534709 |
| 78.8764  | 1.768817 | 1.034722 | 368.5686 | 57.93914 | 22.39624 | 0.185958 | 0.534956 |
| 78.93769 | 1.76897  | 1.034809 | 368.6891 | 57.94401 | 22.39817 | 0.185974 | 0.535204 |
| 78.99898 | 1.769122 | 1.034896 | 368.8094 | 57.94888 | 22.4001  | 0.185989 | 0.535451 |
| 79.06027 | 1.769274 | 1.034982 | 368.9296 | 57.95373 | 22.40203 | 0.186005 | 0.535699 |
| 79.12155 | 1.769425 | 1.035069 | 369.0496 | 57.95859 | 22.40396 | 0.18602  | 0.535946 |
| 79.18284 | 1.769577 | 1.035155 | 369.1695 | 57.96343 | 22.40589 | 0.186036 | 0.536192 |
| 79.24413 | 1.769728 | 1.035242 | 369.2892 | 57.96827 | 22.40781 | 0.186052 | 0.536439 |
| 79.30541 | 1.76988  | 1.035328 | 369.4088 | 57.9731  | 22.40973 | 0.186067 | 0.536685 |
| 79.3667  | 1.770031 | 1.035414 | 369.5283 | 57.97793 | 22.41165 | 0.186083 | 0.536931 |
| 79.42799 | 1.770181 | 1.0355   | 369.6476 | 57.98275 | 22.41357 | 0.186098 | 0.537177 |
| 79.48927 | 1.770332 | 1.035586 | 369.7667 | 57.98757 | 22.41548 | 0.186114 | 0.537423 |
| 79.55056 | 1.770483 | 1.035672 | 369.8857 | 57.99238 | 22.41739 | 0.186129 | 0.537669 |
| 79.61185 | 1.770633 | 1.035758 | 370.0045 | 57.99718 | 22.4193  | 0.186144 | 0.537914 |
| 79.67314 | 1.770783 | 1.035843 | 370.1232 | 58.00198 | 22.42121 | 0.18616  | 0.538159 |
| 79.73442 | 1.770933 | 1.035929 | 370.2418 | 58.00677 | 22.42311 | 0.186175 | 0.538404 |
| 79.79571 | 1.771082 | 1.036014 | 370.3602 | 58.01155 | 22.42501 | 0.186191 | 0.538648 |
| 79.857   | 1.771232 | 1.0361   | 370.4784 | 58.01633 | 22.42691 | 0.186206 | 0.538893 |
| 79.91828 | 1.771381 | 1.036185 | 370.5966 | 58.02111 | 22.42881 | 0.186221 | 0.539137 |
| 79.97957 | 1.771531 | 1.03627  | 370.7145 | 58.02587 | 22.4307  | 0.186237 | 0.539381 |
| 80.04086 | 1.771679 | 1.036355 | 370.8323 | 58.03064 | 22.4326  | 0.186252 | 0.539625 |
| 80.10215 | 1.771828 | 1.03644  | 370.95   | 58.03539 | 22.43449 | 0.186267 | 0.539869 |
| 80.16343 | 1.771977 | 1.036525 | 371.0675 | 58.04014 | 22.43638 | 0.186282 | 0.540112 |
| 80.22472 | 1.772125 | 1.036609 | 371.1849 | 58.04489 | 22.43826 | 0.186298 | 0.540355 |
| 80.28601 | 1.772274 | 1.036694 | 371.3021 | 58.04962 | 22.44014 | 0.186313 | 0.540598 |
| 80.34729 | 1.772422 | 1.036778 | 371.4192 | 58.05436 | 22.44203 | 0.186328 | 0.540841 |
| 80.40858 | 1.772569 | 1.036863 | 371.5361 | 58.05908 | 22.4439  | 0.186343 | 0.541084 |
| 80.46987 | 1.772717 | 1.036947 | 371.6529 | 58.0638  | 22.44578 | 0.186359 | 0.541326 |
| 80.53115 | 1.772865 | 1.037031 | 371.7696 | 58.06852 | 22.44765 | 0.186374 | 0.541568 |

|          |          |          |          |          |          |          |          |
|----------|----------|----------|----------|----------|----------|----------|----------|
| 80.59244 | 1.773012 | 1.037115 | 371.8861 | 58.07323 | 22.44953 | 0.186389 | 0.54181  |
| 80.65373 | 1.773159 | 1.037199 | 372.0025 | 58.07793 | 22.45139 | 0.186404 | 0.542052 |
| 80.71502 | 1.773306 | 1.037283 | 372.1187 | 58.08263 | 22.45326 | 0.186419 | 0.542293 |
| 80.7763  | 1.773453 | 1.037367 | 372.2347 | 58.08732 | 22.45513 | 0.186434 | 0.542535 |
| 80.83759 | 1.773599 | 1.03745  | 372.3507 | 58.092   | 22.45699 | 0.186449 | 0.542776 |
| 80.89888 | 1.773746 | 1.037534 | 372.4664 | 58.09668 | 22.45885 | 0.186464 | 0.543017 |
| 80.96016 | 1.773892 | 1.037617 | 372.5821 | 58.10136 | 22.46071 | 0.186479 | 0.543258 |
| 81.02145 | 1.774038 | 1.037701 | 372.6976 | 58.10603 | 22.46256 | 0.186494 | 0.543498 |
| 81.08274 | 1.774184 | 1.037784 | 372.8129 | 58.11069 | 22.46441 | 0.186509 | 0.543738 |
| 81.14402 | 1.77433  | 1.037867 | 372.9281 | 58.11535 | 22.46627 | 0.186524 | 0.543979 |
| 81.20531 | 1.774475 | 1.03795  | 373.0432 | 58.12    | 22.46811 | 0.186539 | 0.544219 |
| 81.2666  | 1.77462  | 1.038033 | 373.1581 | 58.12464 | 22.46996 | 0.186554 | 0.544458 |
| 81.32789 | 1.774766 | 1.038116 | 373.2729 | 58.12928 | 22.4718  | 0.186569 | 0.544698 |
| 81.38917 | 1.774911 | 1.038198 | 373.3875 | 58.13391 | 22.47365 | 0.186584 | 0.544937 |
| 81.45046 | 1.775055 | 1.038281 | 373.502  | 58.13854 | 22.47549 | 0.186599 | 0.545176 |
| 81.51175 | 1.7752   | 1.038363 | 373.6164 | 58.14316 | 22.47732 | 0.186613 | 0.545415 |
| 81.57303 | 1.775344 | 1.038446 | 373.7306 | 58.14778 | 22.47916 | 0.186628 | 0.545654 |
| 81.63432 | 1.775489 | 1.038528 | 373.8446 | 58.15239 | 22.48099 | 0.186643 | 0.545892 |
| 81.69561 | 1.775633 | 1.03861  | 373.9586 | 58.15699 | 22.48282 | 0.186658 | 0.54613  |
| 81.75689 | 1.775777 | 1.038692 | 374.0723 | 58.16159 | 22.48465 | 0.186673 | 0.546368 |
| 81.81818 | 1.77592  | 1.038774 | 374.186  | 58.16619 | 22.48647 | 0.186687 | 0.546606 |
| 81.87947 | 1.776064 | 1.038856 | 374.2995 | 58.17077 | 22.4883  | 0.186702 | 0.546844 |
| 81.94076 | 1.776207 | 1.038938 | 374.4128 | 58.17536 | 22.49012 | 0.186717 | 0.547081 |
| 82.00204 | 1.77635  | 1.03902  | 374.526  | 58.17993 | 22.49194 | 0.186732 | 0.547319 |
| 82.06333 | 1.776493 | 1.039101 | 374.6391 | 58.1845  | 22.49375 | 0.186746 | 0.547556 |
| 82.12462 | 1.776636 | 1.039183 | 374.7521 | 58.18907 | 22.49557 | 0.186761 | 0.547793 |
| 82.1859  | 1.776779 | 1.039264 | 374.8648 | 58.19363 | 22.49738 | 0.186776 | 0.548029 |
| 82.24719 | 1.776921 | 1.039345 | 374.9775 | 58.19818 | 22.49919 | 0.18679  | 0.548266 |
| 82.30848 | 1.777064 | 1.039427 | 375.09   | 58.20273 | 22.501   | 0.186805 | 0.548502 |
| 82.36977 | 1.777206 | 1.039508 | 375.2024 | 58.20727 | 22.50281 | 0.186819 | 0.548738 |
| 82.43105 | 1.777348 | 1.039589 | 375.3147 | 58.21181 | 22.50461 | 0.186834 | 0.548974 |
| 82.49234 | 1.777489 | 1.03967  | 375.4268 | 58.21634 | 22.50641 | 0.186849 | 0.549209 |
| 82.55363 | 1.777631 | 1.03975  | 375.5387 | 58.22087 | 22.50821 | 0.186863 | 0.549445 |
| 82.61491 | 1.777772 | 1.039831 | 375.6506 | 58.22539 | 22.51001 | 0.186878 | 0.54968  |
| 82.6762  | 1.777914 | 1.039912 | 375.7622 | 58.2299  | 22.5118  | 0.186892 | 0.549915 |
| 82.73749 | 1.778055 | 1.039992 | 375.8738 | 58.23441 | 22.51359 | 0.186907 | 0.55015  |
| 82.79877 | 1.778196 | 1.040073 | 375.9852 | 58.23891 | 22.51538 | 0.186921 | 0.550384 |
| 82.86006 | 1.778336 | 1.040153 | 376.0965 | 58.24341 | 22.51717 | 0.186936 | 0.550619 |
| 82.92135 | 1.778477 | 1.040233 | 376.2076 | 58.2479  | 22.51896 | 0.18695  | 0.550853 |
| 82.98264 | 1.778617 | 1.040313 | 376.3186 | 58.25239 | 22.52074 | 0.186964 | 0.551087 |
| 83.04392 | 1.778758 | 1.040393 | 376.4295 | 58.25687 | 22.52252 | 0.186979 | 0.551321 |
| 83.10521 | 1.778898 | 1.040473 | 376.5402 | 58.26135 | 22.5243  | 0.186993 | 0.551555 |
| 83.1665  | 1.779038 | 1.040553 | 376.6508 | 58.26582 | 22.52608 | 0.187008 | 0.551788 |
| 83.22778 | 1.779177 | 1.040632 | 376.7612 | 58.27028 | 22.52785 | 0.187022 | 0.552021 |
| 83.28907 | 1.779317 | 1.040712 | 376.8715 | 58.27474 | 22.52962 | 0.187036 | 0.552254 |
| 83.35036 | 1.779456 | 1.040792 | 376.9817 | 58.27919 | 22.53139 | 0.187051 | 0.552487 |
| 83.41164 | 1.779595 | 1.040871 | 377.0917 | 58.28364 | 22.53316 | 0.187065 | 0.55272  |

|          |          |          |          |          |          |          |          |
|----------|----------|----------|----------|----------|----------|----------|----------|
| 83.47293 | 1.779734 | 1.04095  | 377.2016 | 58.28808 | 22.53493 | 0.187079 | 0.552952 |
| 83.53422 | 1.779873 | 1.041029 | 377.3114 | 58.29252 | 22.53669 | 0.187093 | 0.553184 |
| 83.59551 | 1.780012 | 1.041108 | 377.421  | 58.29695 | 22.53845 | 0.187108 | 0.553416 |
| 83.65679 | 1.78015  | 1.041187 | 377.5305 | 58.30138 | 22.54021 | 0.187122 | 0.553648 |
| 83.71808 | 1.780289 | 1.041266 | 377.6399 | 58.3058  | 22.54197 | 0.187136 | 0.55388  |
| 83.77937 | 1.780427 | 1.041345 | 377.7491 | 58.31021 | 22.54373 | 0.18715  | 0.554111 |
| 83.84065 | 1.780565 | 1.041424 | 377.8582 | 58.31462 | 22.54548 | 0.187164 | 0.554342 |
| 83.90194 | 1.780702 | 1.041503 | 377.9671 | 58.31903 | 22.54723 | 0.187179 | 0.554573 |
| 83.96323 | 1.78084  | 1.041581 | 378.0759 | 58.32342 | 22.54898 | 0.187193 | 0.554804 |
| 84.02451 | 1.780978 | 1.041659 | 378.1846 | 58.32782 | 22.55072 | 0.187207 | 0.555035 |
| 84.0858  | 1.781115 | 1.041738 | 378.2932 | 58.33221 | 22.55247 | 0.187221 | 0.555265 |
| 84.14709 | 1.781252 | 1.041816 | 378.4016 | 58.33659 | 22.55421 | 0.187235 | 0.555495 |
| 84.20838 | 1.781389 | 1.041894 | 378.5098 | 58.34096 | 22.55595 | 0.187249 | 0.555725 |
| 84.26966 | 1.781526 | 1.041972 | 378.618  | 58.34534 | 22.55769 | 0.187263 | 0.555955 |
| 84.33095 | 1.781662 | 1.04205  | 378.726  | 58.3497  | 22.55942 | 0.187277 | 0.556185 |
| 84.39224 | 1.781799 | 1.042128 | 378.8339 | 58.35406 | 22.56116 | 0.187291 | 0.556414 |
| 84.45352 | 1.781935 | 1.042206 | 378.9416 | 58.35842 | 22.56289 | 0.187305 | 0.556644 |
| 84.51481 | 1.782071 | 1.042283 | 379.0492 | 58.36277 | 22.56462 | 0.187319 | 0.556873 |
| 84.5761  | 1.782207 | 1.042361 | 379.1567 | 58.36711 | 22.56635 | 0.187333 | 0.557101 |
| 84.63739 | 1.782343 | 1.042438 | 379.264  | 58.37145 | 22.56807 | 0.187347 | 0.55733  |
| 84.69867 | 1.782478 | 1.042516 | 379.3712 | 58.37578 | 22.56979 | 0.187361 | 0.557558 |
| 84.75996 | 1.782614 | 1.042593 | 379.4783 | 58.38011 | 22.57151 | 0.187375 | 0.557787 |
| 84.82125 | 1.782749 | 1.04267  | 379.5852 | 58.38443 | 22.57323 | 0.187389 | 0.558015 |
| 84.88253 | 1.782884 | 1.042747 | 379.692  | 58.38875 | 22.57495 | 0.187403 | 0.558243 |
| 84.94382 | 1.783019 | 1.042824 | 379.7987 | 58.39306 | 22.57666 | 0.187416 | 0.55847  |
| 85.00511 | 1.783154 | 1.042901 | 379.9052 | 58.39737 | 22.57838 | 0.18743  | 0.558698 |
| 85.06639 | 1.783289 | 1.042978 | 380.0116 | 58.40167 | 22.58009 | 0.187444 | 0.558925 |
| 85.12768 | 1.783423 | 1.043054 | 380.1179 | 58.40597 | 22.58179 | 0.187458 | 0.559152 |
| 85.18897 | 1.783557 | 1.043131 | 380.224  | 58.41026 | 22.5835  | 0.187472 | 0.559379 |
| 85.25026 | 1.783691 | 1.043207 | 380.3301 | 58.41454 | 22.5852  | 0.187485 | 0.559606 |
| 85.31154 | 1.783825 | 1.043284 | 380.4359 | 58.41882 | 22.5869  | 0.187499 | 0.559832 |
| 85.37283 | 1.783959 | 1.04336  | 380.5417 | 58.4231  | 22.5886  | 0.187513 | 0.560058 |
| 85.43412 | 1.784093 | 1.043436 | 380.6473 | 58.42737 | 22.5903  | 0.187527 | 0.560285 |
| 85.4954  | 1.784226 | 1.043513 | 380.7528 | 58.43163 | 22.592   | 0.18754  | 0.56051  |
| 85.55669 | 1.784359 | 1.043589 | 380.8581 | 58.43589 | 22.59369 | 0.187554 | 0.560736 |
| 85.61798 | 1.784493 | 1.043664 | 380.9634 | 58.44014 | 22.59538 | 0.187568 | 0.560962 |
| 85.67926 | 1.784626 | 1.04374  | 381.0684 | 58.44439 | 22.59707 | 0.187581 | 0.561187 |
| 85.74055 | 1.784758 | 1.043816 | 381.1734 | 58.44864 | 22.59876 | 0.187595 | 0.561412 |
| 85.80184 | 1.784891 | 1.043892 | 381.2782 | 58.45287 | 22.60044 | 0.187609 | 0.561637 |
| 85.86313 | 1.785023 | 1.043967 | 381.3829 | 58.45711 | 22.60213 | 0.187622 | 0.561862 |
| 85.92441 | 1.785156 | 1.044043 | 381.4875 | 58.46133 | 22.60381 | 0.187636 | 0.562086 |
| 85.9857  | 1.785288 | 1.044118 | 381.5919 | 58.46556 | 22.60548 | 0.187649 | 0.562311 |
| 86.04699 | 1.78542  | 1.044193 | 381.6963 | 58.46977 | 22.60716 | 0.187663 | 0.562535 |
| 86.10827 | 1.785552 | 1.044268 | 381.8004 | 58.47398 | 22.60884 | 0.187676 | 0.562759 |
| 86.16956 | 1.785683 | 1.044344 | 381.9045 | 58.47819 | 22.61051 | 0.18769  | 0.562982 |
| 86.23085 | 1.785815 | 1.044419 | 382.0084 | 58.48239 | 22.61218 | 0.187703 | 0.563206 |
| 86.29213 | 1.785946 | 1.044493 | 382.1122 | 58.48659 | 22.61385 | 0.187717 | 0.563429 |

|          |          |          |          |          |          |          |          |
|----------|----------|----------|----------|----------|----------|----------|----------|
| 86.35342 | 1.786077 | 1.044568 | 382.2159 | 58.49078 | 22.61551 | 0.18773  | 0.563653 |
| 86.41471 | 1.786208 | 1.044643 | 382.3194 | 58.49496 | 22.61718 | 0.187744 | 0.563876 |
| 86.476   | 1.786339 | 1.044718 | 382.4228 | 58.49914 | 22.61884 | 0.187757 | 0.564098 |
| 86.53728 | 1.78647  | 1.044792 | 382.5261 | 58.50332 | 22.6205  | 0.187771 | 0.564321 |
| 86.59857 | 1.7866   | 1.044867 | 382.6292 | 58.50749 | 22.62216 | 0.187784 | 0.564543 |
| 86.65986 | 1.78673  | 1.044941 | 382.7323 | 58.51165 | 22.62381 | 0.187797 | 0.564766 |
| 86.72114 | 1.786861 | 1.045015 | 382.8352 | 58.51581 | 22.62547 | 0.187811 | 0.564988 |
| 86.78243 | 1.786991 | 1.045089 | 382.9379 | 58.51997 | 22.62712 | 0.187824 | 0.565209 |
| 86.84372 | 1.78712  | 1.045163 | 383.0406 | 58.52412 | 22.62877 | 0.187837 | 0.565431 |
| 86.90501 | 1.78725  | 1.045237 | 383.1431 | 58.52826 | 22.63042 | 0.187851 | 0.565653 |
| 86.96629 | 1.78738  | 1.045311 | 383.2455 | 58.5324  | 22.63206 | 0.187864 | 0.565874 |
| 87.02758 | 1.787509 | 1.045385 | 383.3477 | 58.53653 | 22.63371 | 0.187877 | 0.566095 |
| 87.08887 | 1.787638 | 1.045459 | 383.4498 | 58.54066 | 22.63535 | 0.187891 | 0.566316 |
| 87.15015 | 1.787767 | 1.045532 | 383.5519 | 58.54479 | 22.63699 | 0.187904 | 0.566536 |
| 87.21144 | 1.787896 | 1.045606 | 383.6537 | 58.54891 | 22.63862 | 0.187917 | 0.566757 |
| 87.27273 | 1.788025 | 1.045679 | 383.7555 | 58.55302 | 22.64026 | 0.18793  | 0.566977 |
| 87.33401 | 1.788154 | 1.045753 | 383.8571 | 58.55713 | 22.64189 | 0.187944 | 0.567197 |
| 87.3953  | 1.788282 | 1.045826 | 383.9586 | 58.56123 | 22.64352 | 0.187957 | 0.567417 |
| 87.45659 | 1.78841  | 1.045899 | 384.06   | 58.56533 | 22.64515 | 0.18797  | 0.567637 |
| 87.51788 | 1.788538 | 1.045972 | 384.1612 | 58.56942 | 22.64678 | 0.187983 | 0.567857 |
| 87.57916 | 1.788666 | 1.046045 | 384.2623 | 58.57351 | 22.64841 | 0.187996 | 0.568076 |
| 87.64045 | 1.788794 | 1.046118 | 384.3633 | 58.57759 | 22.65003 | 0.188009 | 0.568295 |
| 87.70174 | 1.788922 | 1.046191 | 384.4642 | 58.58167 | 22.65165 | 0.188022 | 0.568514 |
| 87.76302 | 1.789049 | 1.046263 | 384.5649 | 58.58574 | 22.65327 | 0.188035 | 0.568733 |
| 87.82431 | 1.789176 | 1.046336 | 384.6655 | 58.58981 | 22.65489 | 0.188049 | 0.568951 |
| 87.8856  | 1.789304 | 1.046408 | 384.766  | 58.59387 | 22.6565  | 0.188062 | 0.56917  |
| 87.94688 | 1.789431 | 1.046481 | 384.8664 | 58.59793 | 22.65812 | 0.188075 | 0.569388 |
| 88.00817 | 1.789557 | 1.046553 | 384.9666 | 58.60198 | 22.65973 | 0.188088 | 0.569606 |
| 88.06946 | 1.789684 | 1.046625 | 385.0668 | 58.60603 | 22.66134 | 0.188101 | 0.569824 |
| 88.13075 | 1.789811 | 1.046698 | 385.1668 | 58.61007 | 22.66295 | 0.188114 | 0.570041 |
| 88.19203 | 1.789937 | 1.04677  | 385.2666 | 58.61411 | 22.66455 | 0.188127 | 0.570259 |
| 88.25332 | 1.790063 | 1.046842 | 385.3664 | 58.61814 | 22.66615 | 0.18814  | 0.570476 |
| 88.31461 | 1.790189 | 1.046914 | 385.466  | 58.62217 | 22.66776 | 0.188153 | 0.570693 |
| 88.37589 | 1.790315 | 1.046985 | 385.5655 | 58.62619 | 22.66936 | 0.188165 | 0.57091  |
| 88.43718 | 1.790441 | 1.047057 | 385.6648 | 58.63021 | 22.67095 | 0.188178 | 0.571127 |
| 88.49847 | 1.790566 | 1.047129 | 385.7641 | 58.63422 | 22.67255 | 0.188191 | 0.571343 |
| 88.55975 | 1.790692 | 1.0472   | 385.8632 | 58.63823 | 22.67414 | 0.188204 | 0.57156  |
| 88.62104 | 1.790817 | 1.047272 | 385.9622 | 58.64223 | 22.67573 | 0.188217 | 0.571776 |
| 88.68233 | 1.790942 | 1.047343 | 386.0611 | 58.64623 | 22.67732 | 0.18823  | 0.571992 |
| 88.74362 | 1.791067 | 1.047414 | 386.1599 | 58.65022 | 22.67891 | 0.188243 | 0.572208 |
| 88.8049  | 1.791192 | 1.047485 | 386.2585 | 58.65421 | 22.6805  | 0.188255 | 0.572423 |
| 88.86619 | 1.791317 | 1.047557 | 386.357  | 58.65819 | 22.68208 | 0.188268 | 0.572639 |
| 88.92748 | 1.791441 | 1.047628 | 386.4554 | 58.66217 | 22.68366 | 0.188281 | 0.572854 |
| 88.98876 | 1.791566 | 1.047699 | 386.5537 | 58.66614 | 22.68524 | 0.188294 | 0.573069 |
| 89.05005 | 1.79169  | 1.047769 | 386.6518 | 58.67011 | 22.68682 | 0.188307 | 0.573284 |
| 89.11134 | 1.791814 | 1.04784  | 386.7498 | 58.67408 | 22.6884  | 0.188319 | 0.573498 |
| 89.17263 | 1.791938 | 1.047911 | 386.8478 | 58.67803 | 22.68997 | 0.188332 | 0.573713 |

|          |          |          |          |          |          |          |          |
|----------|----------|----------|----------|----------|----------|----------|----------|
| 89.23391 | 1.792061 | 1.047981 | 386.9455 | 58.68199 | 22.69154 | 0.188345 | 0.573927 |
| 89.2952  | 1.792185 | 1.048052 | 387.0432 | 58.68594 | 22.69311 | 0.188357 | 0.574141 |
| 89.35649 | 1.792308 | 1.048122 | 387.1408 | 58.68988 | 22.69468 | 0.18837  | 0.574355 |
| 89.41777 | 1.792432 | 1.048192 | 387.2382 | 58.69382 | 22.69625 | 0.188383 | 0.574569 |
| 89.47906 | 1.792555 | 1.048263 | 387.3355 | 58.69775 | 22.69781 | 0.188395 | 0.574782 |
| 89.54035 | 1.792678 | 1.048333 | 387.4327 | 58.70168 | 22.69937 | 0.188408 | 0.574996 |
| 89.60163 | 1.792801 | 1.048403 | 387.5297 | 58.70561 | 22.70093 | 0.188421 | 0.575209 |
| 89.66292 | 1.792923 | 1.048473 | 387.6267 | 58.70953 | 22.70249 | 0.188433 | 0.575422 |
| 89.72421 | 1.793046 | 1.048543 | 387.7235 | 58.71344 | 22.70405 | 0.188446 | 0.575634 |
| 89.7855  | 1.793168 | 1.048613 | 387.8202 | 58.71735 | 22.7056  | 0.188458 | 0.575847 |
| 89.84678 | 1.79329  | 1.048682 | 387.9168 | 58.72125 | 22.70716 | 0.188471 | 0.576059 |
| 89.90807 | 1.793413 | 1.048752 | 388.0132 | 58.72515 | 22.70871 | 0.188483 | 0.576272 |
| 89.96936 | 1.793534 | 1.048821 | 388.1096 | 58.72905 | 22.71026 | 0.188496 | 0.576484 |
| 90.03064 | 1.793656 | 1.048891 | 388.2058 | 58.73294 | 22.7118  | 0.188508 | 0.576696 |
| 90.09193 | 1.793778 | 1.04896  | 388.3019 | 58.73683 | 22.71335 | 0.188521 | 0.576907 |
| 90.15322 | 1.793899 | 1.049029 | 388.3979 | 58.74071 | 22.71489 | 0.188533 | 0.577119 |
| 90.2145  | 1.794021 | 1.049099 | 388.4937 | 58.74458 | 22.71643 | 0.188546 | 0.57733  |
| 90.27579 | 1.794142 | 1.049168 | 388.5895 | 58.74845 | 22.71797 | 0.188558 | 0.577541 |
| 90.33708 | 1.794263 | 1.049237 | 388.6851 | 58.75232 | 22.71951 | 0.188571 | 0.577752 |
| 90.39837 | 1.794384 | 1.049306 | 388.7806 | 58.75618 | 22.72105 | 0.188583 | 0.577963 |
| 90.45965 | 1.794504 | 1.049374 | 388.876  | 58.76004 | 22.72258 | 0.188595 | 0.578173 |
| 90.52094 | 1.794625 | 1.049443 | 388.9713 | 58.76389 | 22.72411 | 0.188608 | 0.578384 |
| 90.58223 | 1.794745 | 1.049512 | 389.0664 | 58.76774 | 22.72564 | 0.18862  | 0.578594 |
| 90.64351 | 1.794866 | 1.04958  | 389.1615 | 58.77158 | 22.72717 | 0.188633 | 0.578804 |
| 90.7048  | 1.794986 | 1.049649 | 389.2564 | 58.77542 | 22.7287  | 0.188645 | 0.579014 |
| 90.76609 | 1.795106 | 1.049717 | 389.3512 | 58.77925 | 22.73022 | 0.188657 | 0.579224 |
| 90.82737 | 1.795226 | 1.049786 | 389.4458 | 58.78308 | 22.73174 | 0.18867  | 0.579433 |
| 90.88866 | 1.795345 | 1.049854 | 389.5404 | 58.7869  | 22.73326 | 0.188682 | 0.579642 |
| 90.94995 | 1.795465 | 1.049922 | 389.6349 | 58.79072 | 22.73478 | 0.188694 | 0.579851 |
| 91.01124 | 1.795584 | 1.04999  | 389.7292 | 58.79453 | 22.7363  | 0.188706 | 0.58006  |
| 91.07252 | 1.795703 | 1.050058 | 389.8234 | 58.79834 | 22.73781 | 0.188719 | 0.580269 |
| 91.13381 | 1.795822 | 1.050126 | 389.9175 | 58.80215 | 22.73933 | 0.188731 | 0.580478 |
| 91.1951  | 1.795941 | 1.050194 | 390.0115 | 58.80595 | 22.74084 | 0.188743 | 0.580686 |
| 91.25638 | 1.79606  | 1.050262 | 390.1053 | 58.80974 | 22.74235 | 0.188755 | 0.580894 |
| 91.31767 | 1.796179 | 1.050329 | 390.1991 | 58.81353 | 22.74385 | 0.188767 | 0.581102 |
| 91.37896 | 1.796297 | 1.050397 | 390.2927 | 58.81732 | 22.74536 | 0.18878  | 0.58131  |
| 91.44025 | 1.796416 | 1.050464 | 390.3862 | 58.8211  | 22.74686 | 0.188792 | 0.581518 |
| 91.50153 | 1.796534 | 1.050532 | 390.4796 | 58.82487 | 22.74836 | 0.188804 | 0.581725 |
| 91.56282 | 1.796652 | 1.050599 | 390.5729 | 58.82864 | 22.74986 | 0.188816 | 0.581932 |
| 91.62411 | 1.79677  | 1.050666 | 390.666  | 58.83241 | 22.75136 | 0.188828 | 0.58214  |
| 91.68539 | 1.796888 | 1.050734 | 390.7591 | 58.83617 | 22.75286 | 0.18884  | 0.582346 |
| 91.74668 | 1.797005 | 1.050801 | 390.852  | 58.83993 | 22.75435 | 0.188852 | 0.582553 |
| 91.80797 | 1.797123 | 1.050868 | 390.9448 | 58.84368 | 22.75585 | 0.188864 | 0.58276  |
| 91.86925 | 1.79724  | 1.050934 | 391.0375 | 58.84743 | 22.75734 | 0.188876 | 0.582966 |
| 91.93054 | 1.797357 | 1.051001 | 391.1301 | 58.85118 | 22.75882 | 0.188888 | 0.583172 |
| 91.99183 | 1.797474 | 1.051068 | 391.2226 | 58.85491 | 22.76031 | 0.1889   | 0.583378 |
| 92.05312 | 1.797591 | 1.051135 | 391.315  | 58.85865 | 22.7618  | 0.188912 | 0.583584 |



|          |          |          |          |          |          |          |          |
|----------|----------|----------|----------|----------|----------|----------|----------|
| 92.1144  | 1.797708 | 1.051201 | 391.4072 | 58.86238 | 22.76328 | 0.188924 | 0.58379  |
| 92.17569 | 1.797825 | 1.051268 | 391.4993 | 58.8661  | 22.76476 | 0.188936 | 0.583995 |
| 92.23698 | 1.797941 | 1.051334 | 391.5913 | 58.86982 | 22.76624 | 0.188948 | 0.584201 |
| 92.29826 | 1.798057 | 1.0514   | 391.6832 | 58.87354 | 22.76772 | 0.18896  | 0.584406 |
| 92.35955 | 1.798173 | 1.051467 | 391.775  | 58.87725 | 22.76919 | 0.188972 | 0.584611 |
| 92.42084 | 1.798289 | 1.051533 | 391.8667 | 58.88096 | 22.77067 | 0.188984 | 0.584816 |
| 92.48212 | 1.798405 | 1.051599 | 391.9582 | 58.88466 | 22.77214 | 0.188996 | 0.58502  |
| 92.54341 | 1.798521 | 1.051665 | 392.0497 | 58.88836 | 22.77361 | 0.189008 | 0.585225 |
| 92.6047  | 1.798637 | 1.051731 | 392.141  | 58.89205 | 22.77508 | 0.18902  | 0.585429 |
| 92.66599 | 1.798752 | 1.051797 | 392.2322 | 58.89574 | 22.77655 | 0.189031 | 0.585633 |
| 92.72727 | 1.798867 | 1.051862 | 392.3233 | 58.89942 | 22.77801 | 0.189043 | 0.585837 |
| 92.78856 | 1.798983 | 1.051928 | 392.4143 | 58.9031  | 22.77948 | 0.189055 | 0.58604  |
| 92.84985 | 1.799098 | 1.051994 | 392.5052 | 58.90677 | 22.78094 | 0.189067 | 0.586244 |
| 92.91113 | 1.799213 | 1.052059 | 392.596  | 58.91044 | 22.7824  | 0.189079 | 0.586447 |
| 92.97242 | 1.799327 | 1.052125 | 392.6866 | 58.91411 | 22.78385 | 0.189091 | 0.58665  |
| 93.03371 | 1.799442 | 1.05219  | 392.7771 | 58.91777 | 22.78531 | 0.189102 | 0.586853 |
| 93.09499 | 1.799556 | 1.052255 | 392.8676 | 58.92143 | 22.78676 | 0.189114 | 0.587056 |
| 93.15628 | 1.799671 | 1.05232  | 392.9579 | 58.92508 | 22.78822 | 0.189126 | 0.587259 |
| 93.21757 | 1.799785 | 1.052386 | 393.0481 | 58.92873 | 22.78967 | 0.189137 | 0.587461 |
| 93.27886 | 1.799899 | 1.052451 | 393.1382 | 58.93237 | 22.79112 | 0.189149 | 0.587664 |
| 93.34014 | 1.800013 | 1.052516 | 393.2282 | 58.93601 | 22.79256 | 0.189161 | 0.587866 |
| 93.40143 | 1.800127 | 1.05258  | 393.318  | 58.93964 | 22.79401 | 0.189173 | 0.588068 |
| 93.46272 | 1.80024  | 1.052645 | 393.4078 | 58.94327 | 22.79545 | 0.189184 | 0.588269 |
| 93.524   | 1.800354 | 1.05271  | 393.4974 | 58.94689 | 22.79689 | 0.189196 | 0.588471 |
| 93.58529 | 1.800467 | 1.052774 | 393.5869 | 58.95051 | 22.79833 | 0.189207 | 0.588672 |
| 93.64658 | 1.80058  | 1.052839 | 393.6764 | 58.95413 | 22.79977 | 0.189219 | 0.588874 |
| 93.70787 | 1.800693 | 1.052903 | 393.7657 | 58.95774 | 22.80121 | 0.189231 | 0.589075 |
| 93.76915 | 1.800806 | 1.052968 | 393.8549 | 58.96135 | 22.80264 | 0.189242 | 0.589275 |
| 93.83044 | 1.800919 | 1.053032 | 393.944  | 58.96495 | 22.80408 | 0.189254 | 0.589476 |
| 93.89173 | 1.801031 | 1.053096 | 394.0329 | 58.96855 | 22.80551 | 0.189265 | 0.589677 |
| 93.95301 | 1.801144 | 1.053161 | 394.1218 | 58.97214 | 22.80694 | 0.189277 | 0.589877 |
| 94.0143  | 1.801256 | 1.053225 | 394.2105 | 58.97573 | 22.80836 | 0.189288 | 0.590077 |
| 94.07559 | 1.801369 | 1.053289 | 394.2992 | 58.97931 | 22.80979 | 0.1893   | 0.590277 |
| 94.13687 | 1.801481 | 1.053352 | 394.3877 | 58.98289 | 22.81121 | 0.189312 | 0.590477 |
| 94.19816 | 1.801593 | 1.053416 | 394.4761 | 58.98647 | 22.81263 | 0.189323 | 0.590677 |
| 94.25945 | 1.801704 | 1.05348  | 394.5645 | 58.99004 | 22.81406 | 0.189334 | 0.590876 |
| 94.32074 | 1.801816 | 1.053544 | 394.6527 | 58.99361 | 22.81547 | 0.189346 | 0.591075 |
| 94.38202 | 1.801928 | 1.053607 | 394.7408 | 58.99717 | 22.81689 | 0.189357 | 0.591274 |
| 94.44331 | 1.802039 | 1.053671 | 394.8287 | 59.00073 | 22.81831 | 0.189369 | 0.591473 |
| 94.5046  | 1.80215  | 1.053734 | 394.9166 | 59.00428 | 22.81972 | 0.18938  | 0.591672 |
| 94.56588 | 1.802261 | 1.053798 | 395.0044 | 59.00783 | 22.82113 | 0.189392 | 0.591871 |
| 94.62717 | 1.802372 | 1.053861 | 395.092  | 59.01137 | 22.82254 | 0.189403 | 0.592069 |
| 94.68846 | 1.802483 | 1.053924 | 395.1796 | 59.01491 | 22.82395 | 0.189414 | 0.592267 |
| 94.74974 | 1.802594 | 1.053987 | 395.267  | 59.01845 | 22.82536 | 0.189426 | 0.592465 |
| 94.81103 | 1.802704 | 1.05405  | 395.3544 | 59.02198 | 22.82676 | 0.189437 | 0.592663 |
| 94.87232 | 1.802815 | 1.054113 | 395.4416 | 59.02551 | 22.82816 | 0.189448 | 0.592861 |
| 94.93361 | 1.802925 | 1.054176 | 395.5287 | 59.02903 | 22.82956 | 0.18946  | 0.593059 |

|          |          |          |          |          |          |          |          |
|----------|----------|----------|----------|----------|----------|----------|----------|
| 94.99489 | 1.803035 | 1.054239 | 395.6157 | 59.03255 | 22.83096 | 0.189471 | 0.593256 |
| 95.05618 | 1.803145 | 1.054302 | 395.7026 | 59.03606 | 22.83236 | 0.189482 | 0.593453 |
| 95.11747 | 1.803255 | 1.054364 | 395.7894 | 59.03957 | 22.83376 | 0.189494 | 0.59365  |
| 95.17875 | 1.803365 | 1.054427 | 395.8761 | 59.04308 | 22.83515 | 0.189505 | 0.593847 |
| 95.24004 | 1.803474 | 1.054489 | 395.9626 | 59.04658 | 22.83654 | 0.189516 | 0.594044 |
| 95.30133 | 1.803584 | 1.054552 | 396.0491 | 59.05007 | 22.83793 | 0.189527 | 0.59424  |
| 95.36261 | 1.803693 | 1.054614 | 396.1355 | 59.05357 | 22.83932 | 0.189539 | 0.594437 |
| 95.4239  | 1.803802 | 1.054676 | 396.2217 | 59.05705 | 22.84071 | 0.18955  | 0.594633 |
| 95.48519 | 1.803911 | 1.054738 | 396.3078 | 59.06054 | 22.8421  | 0.189561 | 0.594829 |
| 95.54648 | 1.80402  | 1.0548   | 396.3939 | 59.06402 | 22.84348 | 0.189572 | 0.595024 |
| 95.60776 | 1.804129 | 1.054863 | 396.4798 | 59.06749 | 22.84486 | 0.189583 | 0.59522  |
| 95.66905 | 1.804238 | 1.054924 | 396.5657 | 59.07096 | 22.84624 | 0.189594 | 0.595416 |
| 95.73034 | 1.804346 | 1.054986 | 396.6514 | 59.07443 | 22.84762 | 0.189606 | 0.595611 |
| 95.79162 | 1.804455 | 1.055048 | 396.737  | 59.07789 | 22.849   | 0.189617 | 0.595806 |
| 95.85291 | 1.804563 | 1.05511  | 396.8225 | 59.08135 | 22.85037 | 0.189628 | 0.596001 |
| 95.9142  | 1.804671 | 1.055172 | 396.9079 | 59.0848  | 22.85175 | 0.189639 | 0.596196 |
| 95.97549 | 1.804779 | 1.055233 | 396.9932 | 59.08825 | 22.85312 | 0.18965  | 0.59639  |
| 96.03677 | 1.804887 | 1.055295 | 397.0784 | 59.0917  | 22.85449 | 0.189661 | 0.596585 |
| 96.09806 | 1.804995 | 1.055356 | 397.1635 | 59.09514 | 22.85586 | 0.189672 | 0.596779 |
| 96.15935 | 1.805102 | 1.055417 | 397.2485 | 59.09857 | 22.85723 | 0.189683 | 0.596973 |
| 96.22063 | 1.80521  | 1.055479 | 397.3333 | 59.102   | 22.85859 | 0.189694 | 0.597167 |
| 96.28192 | 1.805317 | 1.05554  | 397.4181 | 59.10543 | 22.85996 | 0.189705 | 0.597361 |
| 96.34321 | 1.805424 | 1.055601 | 397.5028 | 59.10886 | 22.86132 | 0.189716 | 0.597554 |
| 96.40449 | 1.805531 | 1.055662 | 397.5873 | 59.11228 | 22.86268 | 0.189727 | 0.597748 |
| 96.46578 | 1.805638 | 1.055723 | 397.6718 | 59.11569 | 22.86404 | 0.189738 | 0.597941 |
| 96.52707 | 1.805745 | 1.055784 | 397.7562 | 59.1191  | 22.86539 | 0.189749 | 0.598134 |
| 96.58836 | 1.805852 | 1.055845 | 397.8404 | 59.12251 | 22.86675 | 0.18976  | 0.598327 |
| 96.64964 | 1.805958 | 1.055905 | 397.9245 | 59.12591 | 22.8681  | 0.189771 | 0.59852  |
| 96.71093 | 1.806065 | 1.055966 | 398.0086 | 59.12931 | 22.86945 | 0.189782 | 0.598712 |
| 96.77222 | 1.806171 | 1.056027 | 398.0925 | 59.1327  | 22.8708  | 0.189793 | 0.598905 |
| 96.8335  | 1.806277 | 1.056087 | 398.1763 | 59.13609 | 22.87215 | 0.189804 | 0.599097 |
| 96.89479 | 1.806383 | 1.056148 | 398.2601 | 59.13948 | 22.8735  | 0.189815 | 0.599289 |
| 96.95608 | 1.806489 | 1.056208 | 398.3437 | 59.14286 | 22.87484 | 0.189825 | 0.599481 |
| 97.01736 | 1.806595 | 1.056268 | 398.4272 | 59.14624 | 22.87619 | 0.189836 | 0.599673 |
| 97.07865 | 1.8067   | 1.056328 | 398.5106 | 59.14961 | 22.87753 | 0.189847 | 0.599864 |
| 97.13994 | 1.806806 | 1.056389 | 398.5939 | 59.15298 | 22.87887 | 0.189858 | 0.600056 |
| 97.20123 | 1.806911 | 1.056449 | 398.6771 | 59.15634 | 22.88021 | 0.189869 | 0.600247 |
| 97.26251 | 1.807016 | 1.056509 | 398.7602 | 59.15971 | 22.88154 | 0.18988  | 0.600438 |
| 97.3238  | 1.807121 | 1.056568 | 398.8432 | 59.16306 | 22.88288 | 0.18989  | 0.600629 |
| 97.38509 | 1.807226 | 1.056628 | 398.9261 | 59.16641 | 22.88421 | 0.189901 | 0.600819 |
| 97.44637 | 1.807331 | 1.056688 | 399.0089 | 59.16976 | 22.88555 | 0.189912 | 0.60101  |
| 97.50766 | 1.807436 | 1.056748 | 399.0916 | 59.17311 | 22.88688 | 0.189923 | 0.6012   |
| 97.56895 | 1.807541 | 1.056807 | 399.1742 | 59.17645 | 22.8882  | 0.189933 | 0.601391 |
| 97.63023 | 1.807645 | 1.056867 | 399.2567 | 59.17978 | 22.88953 | 0.189944 | 0.601581 |
| 97.69152 | 1.807749 | 1.056926 | 399.3391 | 59.18311 | 22.89086 | 0.189955 | 0.60177  |
| 97.75281 | 1.807853 | 1.056986 | 399.4214 | 59.18644 | 22.89218 | 0.189965 | 0.60196  |
| 97.8141  | 1.807957 | 1.057045 | 399.5035 | 59.18976 | 22.8935  | 0.189976 | 0.60215  |

|          |          |          |          |          |          |          |          |
|----------|----------|----------|----------|----------|----------|----------|----------|
| 97.87538 | 1.808061 | 1.057104 | 399.5856 | 59.19308 | 22.89482 | 0.189987 | 0.602339 |
| 97.93667 | 1.808165 | 1.057164 | 399.6676 | 59.1964  | 22.89614 | 0.189997 | 0.602528 |
| 97.99796 | 1.808269 | 1.057223 | 399.7495 | 59.19971 | 22.89746 | 0.190008 | 0.602717 |
| 98.05924 | 1.808372 | 1.057282 | 399.8312 | 59.20302 | 22.89877 | 0.190019 | 0.602906 |
| 98.12053 | 1.808476 | 1.057341 | 399.9129 | 59.20632 | 22.90009 | 0.190029 | 0.603095 |
| 98.18182 | 1.808579 | 1.057399 | 399.9945 | 59.20962 | 22.9014  | 0.19004  | 0.603283 |
| 98.24311 | 1.808682 | 1.057458 | 400.0759 | 59.21291 | 22.90271 | 0.190051 | 0.603472 |
| 98.30439 | 1.808785 | 1.057517 | 400.1573 | 59.2162  | 22.90402 | 0.190061 | 0.60366  |
| 98.36568 | 1.808888 | 1.057576 | 400.2386 | 59.21949 | 22.90533 | 0.190072 | 0.603848 |
| 98.42697 | 1.808991 | 1.057634 | 400.3197 | 59.22277 | 22.90663 | 0.190082 | 0.604036 |
| 98.48825 | 1.809094 | 1.057693 | 400.4008 | 59.22605 | 22.90794 | 0.190093 | 0.604223 |
| 98.54954 | 1.809196 | 1.057751 | 400.4818 | 59.22932 | 22.90924 | 0.190103 | 0.604411 |
| 98.61083 | 1.809299 | 1.05781  | 400.5626 | 59.23259 | 22.91054 | 0.190114 | 0.604598 |
| 98.67211 | 1.809401 | 1.057868 | 400.6434 | 59.23586 | 22.91184 | 0.190124 | 0.604786 |
| 98.7334  | 1.809503 | 1.057926 | 400.7241 | 59.23912 | 22.91314 | 0.190135 | 0.604973 |
| 98.79469 | 1.809605 | 1.057984 | 400.8046 | 59.24238 | 22.91443 | 0.190145 | 0.60516  |
| 98.85598 | 1.809707 | 1.058042 | 400.8851 | 59.24563 | 22.91573 | 0.190156 | 0.605346 |
| 98.91726 | 1.809809 | 1.0581   | 400.9654 | 59.24888 | 22.91702 | 0.190166 | 0.605533 |
| 98.97855 | 1.80991  | 1.058158 | 401.0457 | 59.25213 | 22.91831 | 0.190177 | 0.605719 |
| 99.03984 | 1.810012 | 1.058216 | 401.1259 | 59.25537 | 22.9196  | 0.190187 | 0.605905 |
| 99.10112 | 1.810113 | 1.058274 | 401.2059 | 59.25861 | 22.92089 | 0.190197 | 0.606091 |
| 99.16241 | 1.810214 | 1.058332 | 401.2859 | 59.26184 | 22.92218 | 0.190208 | 0.606277 |
| 99.2237  | 1.810316 | 1.058389 | 401.3658 | 59.26507 | 22.92346 | 0.190218 | 0.606463 |
| 99.28498 | 1.810417 | 1.058447 | 401.4455 | 59.2683  | 22.92475 | 0.190228 | 0.606649 |
| 99.34627 | 1.810517 | 1.058504 | 401.5252 | 59.27152 | 22.92603 | 0.190239 | 0.606834 |
| 99.40756 | 1.810618 | 1.058562 | 401.6048 | 59.27474 | 22.92731 | 0.190249 | 0.607019 |
| 99.46885 | 1.810719 | 1.058619 | 401.6842 | 59.27795 | 22.92859 | 0.19026  | 0.607204 |
| 99.53013 | 1.810819 | 1.058677 | 401.7636 | 59.28116 | 22.92986 | 0.19027  | 0.607389 |
| 99.59142 | 1.81092  | 1.058734 | 401.8429 | 59.28437 | 22.93114 | 0.19028  | 0.607574 |
| 99.65271 | 1.81102  | 1.058791 | 401.922  | 59.28757 | 22.93241 | 0.19029  | 0.607758 |
| 99.71399 | 1.81112  | 1.058848 | 402.0011 | 59.29077 | 22.93368 | 0.190301 | 0.607943 |
| 99.77528 | 1.81122  | 1.058905 | 402.0801 | 59.29396 | 22.93496 | 0.190311 | 0.608127 |
| 99.83657 | 1.81132  | 1.058962 | 402.159  | 59.29715 | 22.93622 | 0.190321 | 0.608311 |
| 99.89785 | 1.81142  | 1.059019 | 402.2377 | 59.30034 | 22.93749 | 0.190331 | 0.608495 |
| 99.95914 | 1.811519 | 1.059076 | 402.3164 | 59.30352 | 22.93876 | 0.190342 | 0.608679 |
| 100.0204 | 1.811619 | 1.059132 | 402.395  | 59.3067  | 22.94002 | 0.190352 | 0.608862 |
| 100.0817 | 1.811718 | 1.059189 | 402.4735 | 59.30987 | 22.94129 | 0.190362 | 0.609046 |
| 100.143  | 1.811818 | 1.059246 | 402.5519 | 59.31304 | 22.94255 | 0.190372 | 0.609229 |
| 100.2043 | 1.811917 | 1.059302 | 402.6302 | 59.31621 | 22.94381 | 0.190382 | 0.609412 |
| 100.2656 | 1.812016 | 1.059359 | 402.7084 | 59.31937 | 22.94506 | 0.190393 | 0.609595 |
| 100.3269 | 1.812115 | 1.059415 | 402.7865 | 59.32253 | 22.94632 | 0.190403 | 0.609778 |
| 100.3882 | 1.812213 | 1.059471 | 402.8645 | 59.32568 | 22.94758 | 0.190413 | 0.609961 |
| 100.4494 | 1.812312 | 1.059528 | 402.9424 | 59.32883 | 22.94883 | 0.190423 | 0.610143 |
| 100.5107 | 1.812411 | 1.059584 | 403.0202 | 59.33198 | 22.95008 | 0.190433 | 0.610325 |
| 100.572  | 1.812509 | 1.05964  | 403.0979 | 59.33512 | 22.95133 | 0.190443 | 0.610507 |
| 100.6333 | 1.812607 | 1.059696 | 403.1755 | 59.33826 | 22.95258 | 0.190453 | 0.610689 |
| 100.6946 | 1.812706 | 1.059752 | 403.253  | 59.3414  | 22.95383 | 0.190463 | 0.610871 |

|          |          |          |          |          |          |          |          |
|----------|----------|----------|----------|----------|----------|----------|----------|
| 100.7559 | 1.812804 | 1.059808 | 403.3304 | 59.34453 | 22.95507 | 0.190473 | 0.611053 |
| 100.8172 | 1.812902 | 1.059863 | 403.4078 | 59.34765 | 22.95632 | 0.190483 | 0.611234 |
| 100.8784 | 1.812999 | 1.059919 | 403.485  | 59.35078 | 22.95756 | 0.190493 | 0.611416 |
| 100.9397 | 1.813097 | 1.059975 | 403.5621 | 59.3539  | 22.9588  | 0.190504 | 0.611597 |
| 101.001  | 1.813195 | 1.060031 | 403.6391 | 59.35701 | 22.96004 | 0.190514 | 0.611778 |
| 101.0623 | 1.813292 | 1.060086 | 403.7161 | 59.36012 | 22.96128 | 0.190524 | 0.611959 |
| 101.1236 | 1.813389 | 1.060142 | 403.7929 | 59.36323 | 22.96252 | 0.190534 | 0.612139 |
| 101.1849 | 1.813487 | 1.060197 | 403.8697 | 59.36634 | 22.96375 | 0.190543 | 0.61232  |
| 101.2462 | 1.813584 | 1.060252 | 403.9463 | 59.36944 | 22.96498 | 0.190553 | 0.6125   |
| 101.3075 | 1.813681 | 1.060308 | 404.0229 | 59.37253 | 22.96622 | 0.190563 | 0.612681 |
| 101.3687 | 1.813777 | 1.060363 | 404.0994 | 59.37562 | 22.96745 | 0.190573 | 0.612861 |
| 101.43   | 1.813874 | 1.060418 | 404.1757 | 59.37871 | 22.96868 | 0.190583 | 0.61304  |
| 101.4913 | 1.813971 | 1.060473 | 404.252  | 59.3818  | 22.9699  | 0.190593 | 0.61322  |
| 101.5526 | 1.814067 | 1.060528 | 404.3282 | 59.38488 | 22.97113 | 0.190603 | 0.6134   |
| 101.6139 | 1.814164 | 1.060583 | 404.4043 | 59.38796 | 22.97235 | 0.190613 | 0.613579 |
| 101.6752 | 1.81426  | 1.060638 | 404.4802 | 59.39103 | 22.97358 | 0.190623 | 0.613758 |
| 101.7365 | 1.814356 | 1.060693 | 404.5561 | 59.3941  | 22.9748  | 0.190633 | 0.613937 |
| 101.7978 | 1.814452 | 1.060747 | 404.6319 | 59.39716 | 22.97602 | 0.190643 | 0.614116 |
| 101.859  | 1.814548 | 1.060802 | 404.7076 | 59.40023 | 22.97724 | 0.190652 | 0.614295 |
| 101.9203 | 1.814644 | 1.060856 | 404.7832 | 59.40328 | 22.97845 | 0.190662 | 0.614474 |
| 101.9816 | 1.814739 | 1.060911 | 404.8588 | 59.40634 | 22.97967 | 0.190672 | 0.614652 |
| 102.0429 | 1.814835 | 1.060965 | 404.9342 | 59.40939 | 22.98088 | 0.190682 | 0.614831 |
| 102.1042 | 1.81493  | 1.06102  | 405.0095 | 59.41243 | 22.98209 | 0.190692 | 0.615009 |
| 102.1655 | 1.815025 | 1.061074 | 405.0848 | 59.41548 | 22.9833  | 0.190701 | 0.615187 |
| 102.2268 | 1.815121 | 1.061128 | 405.1599 | 59.41852 | 22.98451 | 0.190711 | 0.615364 |
| 102.288  | 1.815216 | 1.061183 | 405.235  | 59.42155 | 22.98572 | 0.190721 | 0.615542 |
| 102.3493 | 1.815311 | 1.061237 | 405.3099 | 59.42458 | 22.98693 | 0.190731 | 0.61572  |
| 102.4106 | 1.815406 | 1.061291 | 405.3848 | 59.42761 | 22.98813 | 0.19074  | 0.615897 |
| 102.4719 | 1.8155   | 1.061345 | 405.4596 | 59.43064 | 22.98934 | 0.19075  | 0.616074 |
| 102.5332 | 1.815595 | 1.061399 | 405.5343 | 59.43366 | 22.99054 | 0.19076  | 0.616251 |
| 102.5945 | 1.815689 | 1.061453 | 405.6089 | 59.43668 | 22.99174 | 0.190769 | 0.616428 |
| 102.6558 | 1.815784 | 1.061506 | 405.6834 | 59.43969 | 22.99294 | 0.190779 | 0.616605 |
| 102.7171 | 1.815878 | 1.06156  | 405.7578 | 59.4427  | 22.99413 | 0.190789 | 0.616781 |
| 102.7783 | 1.815972 | 1.061614 | 405.8321 | 59.4457  | 22.99533 | 0.190798 | 0.616958 |
| 102.8396 | 1.816066 | 1.061667 | 405.9063 | 59.44871 | 22.99653 | 0.190808 | 0.617134 |
| 102.9009 | 1.81616  | 1.061721 | 405.9805 | 59.4517  | 22.99772 | 0.190818 | 0.61731  |
| 102.9622 | 1.816254 | 1.061774 | 406.0545 | 59.4547  | 22.99891 | 0.190827 | 0.617486 |
| 103.0235 | 1.816347 | 1.061828 | 406.1285 | 59.45769 | 23.0001  | 0.190837 | 0.617662 |
| 103.0848 | 1.816441 | 1.061881 | 406.2023 | 59.46068 | 23.00129 | 0.190847 | 0.617837 |
| 103.1461 | 1.816534 | 1.061934 | 406.2761 | 59.46366 | 23.00248 | 0.190856 | 0.618013 |
| 103.2074 | 1.816628 | 1.061987 | 406.3498 | 59.46664 | 23.00366 | 0.190866 | 0.618188 |
| 103.2686 | 1.816721 | 1.062041 | 406.4234 | 59.46962 | 23.00485 | 0.190875 | 0.618363 |
| 103.3299 | 1.816814 | 1.062094 | 406.4969 | 59.47259 | 23.00603 | 0.190885 | 0.618538 |
| 103.3912 | 1.816907 | 1.062147 | 406.5703 | 59.47556 | 23.00721 | 0.190894 | 0.618713 |
| 103.4525 | 1.817    | 1.0622   | 406.6436 | 59.47852 | 23.00839 | 0.190904 | 0.618888 |
| 103.5138 | 1.817093 | 1.062252 | 406.7168 | 59.48149 | 23.00957 | 0.190913 | 0.619062 |
| 103.5751 | 1.817185 | 1.062305 | 406.7899 | 59.48444 | 23.01075 | 0.190923 | 0.619237 |

|          |          |          |          |          |          |          |          |
|----------|----------|----------|----------|----------|----------|----------|----------|
| 103.6364 | 1.817278 | 1.062358 | 406.863  | 59.4874  | 23.01192 | 0.190932 | 0.619411 |
| 103.6977 | 1.81737  | 1.062411 | 406.9359 | 59.49035 | 23.01309 | 0.190942 | 0.619585 |
| 103.7589 | 1.817463 | 1.062463 | 407.0088 | 59.4933  | 23.01427 | 0.190951 | 0.619759 |
| 103.8202 | 1.817555 | 1.062516 | 407.0816 | 59.49624 | 23.01544 | 0.190961 | 0.619933 |
| 103.8815 | 1.817647 | 1.062568 | 407.1542 | 59.49918 | 23.01661 | 0.19097  | 0.620106 |
| 103.9428 | 1.817739 | 1.062621 | 407.2268 | 59.50211 | 23.01778 | 0.19098  | 0.62028  |
| 104.0041 | 1.817831 | 1.062673 | 407.2993 | 59.50505 | 23.01894 | 0.190989 | 0.620453 |
| 104.0654 | 1.817922 | 1.062725 | 407.3717 | 59.50797 | 23.02011 | 0.190999 | 0.620626 |
| 104.1267 | 1.818014 | 1.062777 | 407.4441 | 59.5109  | 23.02127 | 0.191008 | 0.620799 |
| 104.1879 | 1.818105 | 1.06283  | 407.5163 | 59.51382 | 23.02244 | 0.191017 | 0.620972 |
| 104.2492 | 1.818197 | 1.062882 | 407.5884 | 59.51674 | 23.0236  | 0.191027 | 0.621145 |
| 104.3105 | 1.818288 | 1.062934 | 407.6605 | 59.51965 | 23.02476 | 0.191036 | 0.621317 |
| 104.3718 | 1.818379 | 1.062986 | 407.7325 | 59.52256 | 23.02591 | 0.191045 | 0.621489 |
| 104.4331 | 1.81847  | 1.063038 | 407.8043 | 59.52547 | 23.02707 | 0.191055 | 0.621662 |
| 104.4944 | 1.818561 | 1.063089 | 407.8761 | 59.52837 | 23.02823 | 0.191064 | 0.621834 |
| 104.5557 | 1.818652 | 1.063141 | 407.9478 | 59.53127 | 23.02938 | 0.191073 | 0.622006 |
| 104.617  | 1.818743 | 1.063193 | 408.0194 | 59.53417 | 23.03053 | 0.191083 | 0.622177 |
| 104.6782 | 1.818833 | 1.063245 | 408.0909 | 59.53706 | 23.03168 | 0.191092 | 0.622349 |
| 104.7395 | 1.818924 | 1.063296 | 408.1624 | 59.53995 | 23.03283 | 0.191101 | 0.62252  |
| 104.8008 | 1.819014 | 1.063348 | 408.2337 | 59.54284 | 23.03398 | 0.191111 | 0.622692 |
| 104.8621 | 1.819104 | 1.063399 | 408.305  | 59.54572 | 23.03513 | 0.19112  | 0.622863 |
| 104.9234 | 1.819195 | 1.06345  | 408.3761 | 59.5486  | 23.03627 | 0.191129 | 0.623034 |
| 104.9847 | 1.819285 | 1.063502 | 408.4472 | 59.55147 | 23.03742 | 0.191138 | 0.623205 |
| 105.046  | 1.819375 | 1.063553 | 408.5182 | 59.55434 | 23.03856 | 0.191148 | 0.623375 |
| 105.1073 | 1.819464 | 1.063604 | 408.5891 | 59.55721 | 23.0397  | 0.191157 | 0.623546 |
| 105.1685 | 1.819554 | 1.063655 | 408.6599 | 59.56008 | 23.04084 | 0.191166 | 0.623716 |
| 105.2298 | 1.819644 | 1.063706 | 408.7306 | 59.56294 | 23.04198 | 0.191175 | 0.623886 |
| 105.2911 | 1.819733 | 1.063757 | 408.8013 | 59.56579 | 23.04312 | 0.191184 | 0.624056 |
| 105.3524 | 1.819823 | 1.063808 | 408.8718 | 59.56865 | 23.04425 | 0.191194 | 0.624226 |
| 105.4137 | 1.819912 | 1.063859 | 408.9423 | 59.5715  | 23.04539 | 0.191203 | 0.624396 |
| 105.475  | 1.820001 | 1.06391  | 409.0127 | 59.57434 | 23.04652 | 0.191212 | 0.624566 |
| 105.5363 | 1.82009  | 1.063961 | 409.0829 | 59.57719 | 23.04765 | 0.191221 | 0.624735 |
| 105.5975 | 1.820179 | 1.064011 | 409.1531 | 59.58003 | 23.04878 | 0.19123  | 0.624904 |
| 105.6588 | 1.820268 | 1.064062 | 409.2233 | 59.58286 | 23.04991 | 0.191239 | 0.625074 |
| 105.7201 | 1.820356 | 1.064113 | 409.2933 | 59.5857  | 23.05104 | 0.191248 | 0.625243 |
| 105.7814 | 1.820445 | 1.064163 | 409.3632 | 59.58852 | 23.05216 | 0.191257 | 0.625411 |
| 105.8427 | 1.820534 | 1.064214 | 409.4331 | 59.59135 | 23.05329 | 0.191266 | 0.62558  |
| 105.904  | 1.820622 | 1.064264 | 409.5028 | 59.59417 | 23.05441 | 0.191276 | 0.625749 |
| 105.9653 | 1.82071  | 1.064314 | 409.5725 | 59.59699 | 23.05553 | 0.191285 | 0.625917 |
| 106.0266 | 1.820798 | 1.064364 | 409.6421 | 59.5998  | 23.05665 | 0.191294 | 0.626085 |
| 106.0878 | 1.820886 | 1.064415 | 409.7116 | 59.60262 | 23.05777 | 0.191303 | 0.626253 |
| 106.1491 | 1.820974 | 1.064465 | 409.7811 | 59.60542 | 23.05889 | 0.191312 | 0.626421 |
| 106.2104 | 1.821062 | 1.064515 | 409.8504 | 59.60823 | 23.06    | 0.191321 | 0.626589 |
| 106.2717 | 1.82115  | 1.064565 | 409.9196 | 59.61103 | 23.06112 | 0.19133  | 0.626757 |
| 106.333  | 1.821238 | 1.064615 | 409.9888 | 59.61383 | 23.06223 | 0.191339 | 0.626924 |
| 106.3943 | 1.821325 | 1.064665 | 410.0579 | 59.61662 | 23.06334 | 0.191348 | 0.627092 |
| 106.4556 | 1.821412 | 1.064714 | 410.1269 | 59.61941 | 23.06445 | 0.191357 | 0.627259 |

|          |          |          |          |          |          |          |          |
|----------|----------|----------|----------|----------|----------|----------|----------|
| 106.5169 | 1.8215   | 1.064764 | 410.1958 | 59.6222  | 23.06556 | 0.191366 | 0.627426 |
| 106.5781 | 1.821587 | 1.064814 | 410.2646 | 59.62498 | 23.06667 | 0.191375 | 0.627593 |
| 106.6394 | 1.821674 | 1.064864 | 410.3333 | 59.62776 | 23.06778 | 0.191383 | 0.62776  |
| 106.7007 | 1.821761 | 1.064913 | 410.402  | 59.63054 | 23.06888 | 0.191392 | 0.627926 |
| 106.762  | 1.821848 | 1.064963 | 410.4706 | 59.63331 | 23.06999 | 0.191401 | 0.628093 |
| 106.8233 | 1.821935 | 1.065012 | 410.539  | 59.63608 | 23.07109 | 0.19141  | 0.628259 |
| 106.8846 | 1.822021 | 1.065061 | 410.6074 | 59.63885 | 23.07219 | 0.191419 | 0.628425 |
| 106.9459 | 1.822108 | 1.065111 | 410.6758 | 59.64161 | 23.07329 | 0.191428 | 0.628591 |
| 107.0072 | 1.822194 | 1.06516  | 410.744  | 59.64437 | 23.07439 | 0.191437 | 0.628757 |
| 107.0684 | 1.822281 | 1.065209 | 410.8121 | 59.64713 | 23.07548 | 0.191446 | 0.628923 |
| 107.1297 | 1.822367 | 1.065258 | 410.8802 | 59.64988 | 23.07658 | 0.191455 | 0.629088 |
| 107.191  | 1.822453 | 1.065307 | 410.9482 | 59.65263 | 23.07767 | 0.191463 | 0.629254 |
| 107.2523 | 1.822539 | 1.065356 | 411.0161 | 59.65538 | 23.07877 | 0.191472 | 0.629419 |
| 107.3136 | 1.822625 | 1.065405 | 411.0839 | 59.65812 | 23.07986 | 0.191481 | 0.629584 |
| 107.3749 | 1.822711 | 1.065454 | 411.1516 | 59.66086 | 23.08095 | 0.19149  | 0.629749 |
| 107.4362 | 1.822796 | 1.065503 | 411.2192 | 59.6636  | 23.08204 | 0.191499 | 0.629914 |
| 107.4974 | 1.822882 | 1.065552 | 411.2868 | 59.66633 | 23.08312 | 0.191507 | 0.630079 |
| 107.5587 | 1.822967 | 1.065601 | 411.3542 | 59.66906 | 23.08421 | 0.191516 | 0.630243 |
| 107.62   | 1.823053 | 1.065649 | 411.4216 | 59.67178 | 23.0853  | 0.191525 | 0.630407 |
| 107.6813 | 1.823138 | 1.065698 | 411.4889 | 59.67451 | 23.08638 | 0.191534 | 0.630572 |
| 107.7426 | 1.823223 | 1.065746 | 411.5561 | 59.67722 | 23.08746 | 0.191542 | 0.630736 |
| 107.8039 | 1.823308 | 1.065795 | 411.6233 | 59.67994 | 23.08854 | 0.191551 | 0.6309   |
| 107.8652 | 1.823393 | 1.065843 | 411.6903 | 59.68265 | 23.08962 | 0.19156  | 0.631064 |
| 107.9265 | 1.823478 | 1.065892 | 411.7573 | 59.68536 | 23.0907  | 0.191568 | 0.631227 |
| 107.9877 | 1.823563 | 1.06594  | 411.8242 | 59.68807 | 23.09178 | 0.191577 | 0.631391 |
| 108.049  | 1.823648 | 1.065988 | 411.891  | 59.69077 | 23.09285 | 0.191586 | 0.631554 |
| 108.1103 | 1.823732 | 1.066036 | 411.9577 | 59.69347 | 23.09393 | 0.191595 | 0.631717 |
| 108.1716 | 1.823817 | 1.066085 | 412.0244 | 59.69616 | 23.095   | 0.191603 | 0.63188  |
| 108.2329 | 1.823901 | 1.066133 | 412.0909 | 59.69886 | 23.09607 | 0.191612 | 0.632043 |
| 108.2942 | 1.823985 | 1.066181 | 412.1574 | 59.70154 | 23.09714 | 0.19162  | 0.632206 |
| 108.3555 | 1.824069 | 1.066228 | 412.2238 | 59.70423 | 23.09821 | 0.191629 | 0.632369 |
| 108.4168 | 1.824153 | 1.066276 | 412.2901 | 59.70691 | 23.09928 | 0.191638 | 0.632531 |
| 108.478  | 1.824237 | 1.066324 | 412.3563 | 59.70959 | 23.10034 | 0.191646 | 0.632693 |
| 108.5393 | 1.824321 | 1.066372 | 412.4225 | 59.71227 | 23.10141 | 0.191655 | 0.632856 |
| 108.6006 | 1.824405 | 1.06642  | 412.4885 | 59.71494 | 23.10247 | 0.191664 | 0.633018 |
| 108.6619 | 1.824488 | 1.066467 | 412.5545 | 59.71761 | 23.10353 | 0.191672 | 0.633179 |
| 108.7232 | 1.824572 | 1.066515 | 412.6204 | 59.72027 | 23.10459 | 0.191681 | 0.633341 |
| 108.7845 | 1.824655 | 1.066562 | 412.6862 | 59.72294 | 23.10565 | 0.191689 | 0.633503 |
| 108.8458 | 1.824738 | 1.06661  | 412.7519 | 59.72559 | 23.10671 | 0.191698 | 0.633664 |
| 108.907  | 1.824822 | 1.066657 | 412.8176 | 59.72825 | 23.10777 | 0.191706 | 0.633826 |
| 108.9683 | 1.824905 | 1.066705 | 412.8832 | 59.7309  | 23.10882 | 0.191715 | 0.633987 |
| 109.0296 | 1.824988 | 1.066752 | 412.9487 | 59.73355 | 23.10988 | 0.191723 | 0.634148 |
| 109.0909 | 1.825071 | 1.066799 | 413.0141 | 59.7362  | 23.11093 | 0.191732 | 0.634309 |
| 109.1522 | 1.825153 | 1.066846 | 413.0794 | 59.73884 | 23.11198 | 0.19174  | 0.634469 |
| 109.2135 | 1.825236 | 1.066893 | 413.1446 | 59.74148 | 23.11303 | 0.191749 | 0.63463  |
| 109.2748 | 1.825319 | 1.06694  | 413.2098 | 59.74412 | 23.11408 | 0.191757 | 0.63479  |
| 109.3361 | 1.825401 | 1.066987 | 413.2749 | 59.74675 | 23.11513 | 0.191766 | 0.634951 |

|          |          |          |          |          |          |          |          |
|----------|----------|----------|----------|----------|----------|----------|----------|
| 109.3973 | 1.825483 | 1.067034 | 413.3399 | 59.74938 | 23.11618 | 0.191774 | 0.635111 |
| 109.4586 | 1.825566 | 1.067081 | 413.4048 | 59.752   | 23.11722 | 0.191783 | 0.635271 |
| 109.5199 | 1.825648 | 1.067128 | 413.4697 | 59.75463 | 23.11827 | 0.191791 | 0.635431 |
| 109.5812 | 1.82573  | 1.067175 | 413.5344 | 59.75725 | 23.11931 | 0.191799 | 0.63559  |
| 109.6425 | 1.825812 | 1.067222 | 413.5991 | 59.75986 | 23.12035 | 0.191808 | 0.63575  |
| 109.7038 | 1.825894 | 1.067268 | 413.6637 | 59.76248 | 23.12139 | 0.191816 | 0.635909 |
| 109.7651 | 1.825975 | 1.067315 | 413.7282 | 59.76509 | 23.12243 | 0.191825 | 0.636069 |
| 109.8264 | 1.826057 | 1.067361 | 413.7927 | 59.76769 | 23.12347 | 0.191833 | 0.636228 |
| 109.8876 | 1.826139 | 1.067408 | 413.857  | 59.7703  | 23.1245  | 0.191841 | 0.636387 |
| 109.9489 | 1.82622  | 1.067454 | 413.9213 | 59.7729  | 23.12554 | 0.19185  | 0.636546 |
| 110.0102 | 1.826301 | 1.067501 | 413.9855 | 59.77549 | 23.12657 | 0.191858 | 0.636704 |
| 110.0715 | 1.826383 | 1.067547 | 414.0496 | 59.77809 | 23.1276  | 0.191866 | 0.636863 |
| 110.1328 | 1.826464 | 1.067593 | 414.1137 | 59.78068 | 23.12863 | 0.191875 | 0.637021 |
| 110.1941 | 1.826545 | 1.067639 | 414.1776 | 59.78327 | 23.12966 | 0.191883 | 0.63718  |
| 110.2554 | 1.826626 | 1.067685 | 414.2415 | 59.78585 | 23.13069 | 0.191891 | 0.637338 |
| 110.3166 | 1.826707 | 1.067732 | 414.3053 | 59.78843 | 23.13172 | 0.1919   | 0.637496 |
| 110.3779 | 1.826787 | 1.067778 | 414.3691 | 59.79101 | 23.13275 | 0.191908 | 0.637654 |
| 110.4392 | 1.826868 | 1.067823 | 414.4327 | 59.79358 | 23.13377 | 0.191916 | 0.637812 |
| 110.5005 | 1.826949 | 1.067869 | 414.4963 | 59.79615 | 23.13479 | 0.191924 | 0.637969 |
| 110.5618 | 1.827029 | 1.067915 | 414.5597 | 59.79872 | 23.13582 | 0.191933 | 0.638127 |
| 110.6231 | 1.827109 | 1.067961 | 414.6232 | 59.80129 | 23.13684 | 0.191941 | 0.638284 |
| 110.6844 | 1.82719  | 1.068007 | 414.6865 | 59.80385 | 23.13786 | 0.191949 | 0.638441 |
| 110.7457 | 1.82727  | 1.068052 | 414.7497 | 59.80641 | 23.13888 | 0.191957 | 0.638598 |
| 110.8069 | 1.82735  | 1.068098 | 414.8129 | 59.80896 | 23.13989 | 0.191966 | 0.638755 |
| 110.8682 | 1.82743  | 1.068144 | 414.876  | 59.81152 | 23.14091 | 0.191974 | 0.638912 |
| 110.9295 | 1.82751  | 1.068189 | 414.939  | 59.81406 | 23.14192 | 0.191982 | 0.639068 |
| 110.9908 | 1.827589 | 1.068235 | 415.0019 | 59.81661 | 23.14294 | 0.19199  | 0.639225 |
| 111.0521 | 1.827669 | 1.06828  | 415.0648 | 59.81915 | 23.14395 | 0.191998 | 0.639381 |
| 111.1134 | 1.827749 | 1.068325 | 415.1276 | 59.82169 | 23.14496 | 0.192007 | 0.639537 |
| 111.1747 | 1.827828 | 1.068371 | 415.1903 | 59.82423 | 23.14597 | 0.192015 | 0.639693 |
| 111.236  | 1.827907 | 1.068416 | 415.2529 | 59.82676 | 23.14698 | 0.192023 | 0.639849 |
| 111.2972 | 1.827987 | 1.068461 | 415.3155 | 59.82929 | 23.14798 | 0.192031 | 0.640005 |
| 111.3585 | 1.828066 | 1.068506 | 415.3779 | 59.83182 | 23.14899 | 0.192039 | 0.64016  |
| 111.4198 | 1.828145 | 1.068551 | 415.4403 | 59.83434 | 23.14999 | 0.192047 | 0.640316 |
| 111.4811 | 1.828224 | 1.068596 | 415.5026 | 59.83686 | 23.151   | 0.192055 | 0.640471 |
| 111.5424 | 1.828303 | 1.068641 | 415.5649 | 59.83938 | 23.152   | 0.192063 | 0.640626 |
| 111.6037 | 1.828382 | 1.068686 | 415.627  | 59.8419  | 23.153   | 0.192071 | 0.640781 |
| 111.665  | 1.82846  | 1.068731 | 415.6891 | 59.84441 | 23.154   | 0.19208  | 0.640936 |
| 111.7263 | 1.828539 | 1.068776 | 415.7511 | 59.84692 | 23.155   | 0.192088 | 0.641091 |
| 111.7875 | 1.828617 | 1.06882  | 415.813  | 59.84942 | 23.156   | 0.192096 | 0.641246 |
| 111.8488 | 1.828696 | 1.068865 | 415.8749 | 59.85192 | 23.15699 | 0.192104 | 0.6414   |
| 111.9101 | 1.828774 | 1.068909 | 415.9366 | 59.85442 | 23.15799 | 0.192112 | 0.641555 |
| 111.9714 | 1.828852 | 1.068954 | 415.9983 | 59.85692 | 23.15898 | 0.19212  | 0.641709 |
| 112.0327 | 1.82893  | 1.068999 | 416.06   | 59.85941 | 23.15997 | 0.192128 | 0.641863 |
| 112.094  | 1.829008 | 1.069043 | 416.1215 | 59.8619  | 23.16096 | 0.192136 | 0.642017 |
| 112.1553 | 1.829086 | 1.069087 | 416.183  | 59.86439 | 23.16195 | 0.192144 | 0.642171 |
| 112.2165 | 1.829164 | 1.069132 | 416.2443 | 59.86687 | 23.16294 | 0.192152 | 0.642324 |

|          |          |          |          |          |          |          |          |
|----------|----------|----------|----------|----------|----------|----------|----------|
| 112.2778 | 1.829242 | 1.069176 | 416.3056 | 59.86935 | 23.16393 | 0.19216  | 0.642478 |
| 112.3391 | 1.829319 | 1.06922  | 416.3669 | 59.87183 | 23.16491 | 0.192168 | 0.642631 |
| 112.4004 | 1.829397 | 1.069264 | 416.428  | 59.8743  | 23.1659  | 0.192176 | 0.642784 |
| 112.4617 | 1.829474 | 1.069308 | 416.4891 | 59.87677 | 23.16688 | 0.192183 | 0.642937 |
| 112.523  | 1.829551 | 1.069352 | 416.5501 | 59.87924 | 23.16786 | 0.192191 | 0.64309  |
| 112.5843 | 1.829629 | 1.069396 | 416.6111 | 59.8817  | 23.16885 | 0.192199 | 0.643243 |
| 112.6456 | 1.829706 | 1.06944  | 416.6719 | 59.88417 | 23.16983 | 0.192207 | 0.643396 |
| 112.7068 | 1.829783 | 1.069484 | 416.7327 | 59.88662 | 23.1708  | 0.192215 | 0.643548 |
| 112.7681 | 1.82986  | 1.069528 | 416.7934 | 59.88908 | 23.17178 | 0.192223 | 0.643701 |
| 112.8294 | 1.829937 | 1.069572 | 416.854  | 59.89153 | 23.17276 | 0.192231 | 0.643853 |
| 112.8907 | 1.830013 | 1.069616 | 416.9146 | 59.89398 | 23.17373 | 0.192239 | 0.644005 |
| 112.952  | 1.83009  | 1.069659 | 416.975  | 59.89643 | 23.17471 | 0.192247 | 0.644157 |
| 113.0133 | 1.830166 | 1.069703 | 417.0354 | 59.89887 | 23.17568 | 0.192254 | 0.644309 |
| 113.0746 | 1.830243 | 1.069747 | 417.0958 | 59.90131 | 23.17665 | 0.192262 | 0.644461 |
| 113.1359 | 1.830319 | 1.06979  | 417.156  | 59.90375 | 23.17762 | 0.19227  | 0.644612 |
| 113.1971 | 1.830396 | 1.069833 | 417.2162 | 59.90618 | 23.17859 | 0.192278 | 0.644764 |
| 113.2584 | 1.830472 | 1.069877 | 417.2763 | 59.90861 | 23.17956 | 0.192286 | 0.644915 |
| 113.3197 | 1.830548 | 1.06992  | 417.3363 | 59.91104 | 23.18052 | 0.192294 | 0.645066 |
| 113.381  | 1.830624 | 1.069963 | 417.3962 | 59.91347 | 23.18149 | 0.192301 | 0.645217 |
| 113.4423 | 1.8307   | 1.070007 | 417.4561 | 59.91589 | 23.18245 | 0.192309 | 0.645368 |
| 113.5036 | 1.830775 | 1.07005  | 417.5159 | 59.91831 | 23.18342 | 0.192317 | 0.645519 |
| 113.5649 | 1.830851 | 1.070093 | 417.5756 | 59.92072 | 23.18438 | 0.192325 | 0.64567  |
| 113.6261 | 1.830927 | 1.070136 | 417.6353 | 59.92314 | 23.18534 | 0.192332 | 0.64582  |
| 113.6874 | 1.831002 | 1.070179 | 417.6948 | 59.92555 | 23.1863  | 0.19234  | 0.645971 |
| 113.7487 | 1.831078 | 1.070222 | 417.7543 | 59.92795 | 23.18726 | 0.192348 | 0.646121 |
| 113.81   | 1.831153 | 1.070265 | 417.8138 | 59.93036 | 23.18821 | 0.192356 | 0.646271 |
| 113.8713 | 1.831228 | 1.070308 | 417.8731 | 59.93276 | 23.18917 | 0.192363 | 0.646421 |
| 113.9326 | 1.831303 | 1.070351 | 417.9324 | 59.93516 | 23.19012 | 0.192371 | 0.646571 |
| 113.9939 | 1.831378 | 1.070393 | 417.9916 | 59.93755 | 23.19108 | 0.192379 | 0.64672  |
| 114.0552 | 1.831453 | 1.070436 | 418.0507 | 59.93994 | 23.19203 | 0.192386 | 0.64687  |
| 114.1164 | 1.831528 | 1.070479 | 418.1098 | 59.94233 | 23.19298 | 0.192394 | 0.647019 |
| 114.1777 | 1.831603 | 1.070521 | 418.1688 | 59.94472 | 23.19393 | 0.192402 | 0.647169 |
| 114.239  | 1.831677 | 1.070564 | 418.2277 | 59.9471  | 23.19488 | 0.192409 | 0.647318 |
| 114.3003 | 1.831752 | 1.070606 | 418.2865 | 59.94948 | 23.19583 | 0.192417 | 0.647467 |
| 114.3616 | 1.831827 | 1.070649 | 418.3453 | 59.95186 | 23.19677 | 0.192425 | 0.647616 |
| 114.4229 | 1.831901 | 1.070691 | 418.404  | 59.95424 | 23.19772 | 0.192432 | 0.647764 |
| 114.4842 | 1.831975 | 1.070734 | 418.4627 | 59.95661 | 23.19866 | 0.19244  | 0.647913 |
| 114.5455 | 1.83205  | 1.070776 | 418.5212 | 59.95898 | 23.19961 | 0.192448 | 0.648061 |
| 114.6067 | 1.832124 | 1.070818 | 418.5797 | 59.96135 | 23.20055 | 0.192455 | 0.64821  |
| 114.668  | 1.832198 | 1.07086  | 418.6382 | 59.96371 | 23.20149 | 0.192463 | 0.648358 |
| 114.7293 | 1.832272 | 1.070903 | 418.6965 | 59.96607 | 23.20243 | 0.19247  | 0.648506 |
| 114.7906 | 1.832346 | 1.070945 | 418.7548 | 59.96843 | 23.20337 | 0.192478 | 0.648654 |
| 114.8519 | 1.832419 | 1.070987 | 418.8131 | 59.97079 | 23.20431 | 0.192486 | 0.648802 |
| 114.9132 | 1.832493 | 1.071029 | 418.8712 | 59.97314 | 23.20524 | 0.192493 | 0.648949 |
| 114.9745 | 1.832567 | 1.071071 | 418.9293 | 59.97549 | 23.20618 | 0.192501 | 0.649097 |
| 115.0358 | 1.83264  | 1.071112 | 418.9873 | 59.97783 | 23.20711 | 0.192508 | 0.649244 |
| 115.097  | 1.832714 | 1.071154 | 419.0452 | 59.98018 | 23.20804 | 0.192516 | 0.649391 |



|          |          |          |          |          |          |          |          |
|----------|----------|----------|----------|----------|----------|----------|----------|
| 115.1583 | 1.832787 | 1.071196 | 419.1031 | 59.98252 | 23.20898 | 0.192523 | 0.649539 |
| 115.2196 | 1.83286  | 1.071238 | 419.1609 | 59.98486 | 23.20991 | 0.192531 | 0.649686 |
| 115.2809 | 1.832933 | 1.07128  | 419.2186 | 59.98719 | 23.21084 | 0.192538 | 0.649832 |
| 115.3422 | 1.833007 | 1.071321 | 419.2762 | 59.98952 | 23.21176 | 0.192546 | 0.649979 |
| 115.4035 | 1.83308  | 1.071363 | 419.3338 | 59.99185 | 23.21269 | 0.192553 | 0.650126 |
| 115.4648 | 1.833152 | 1.071404 | 419.3913 | 59.99418 | 23.21362 | 0.192561 | 0.650272 |
| 115.526  | 1.833225 | 1.071446 | 419.4488 | 59.9965  | 23.21454 | 0.192568 | 0.650418 |
| 115.5873 | 1.833298 | 1.071487 | 419.5061 | 59.99882 | 23.21547 | 0.192576 | 0.650565 |
| 115.6486 | 1.833371 | 1.071529 | 419.5634 | 60.00114 | 23.21639 | 0.192583 | 0.650711 |
| 115.7099 | 1.833443 | 1.07157  | 419.6206 | 60.00346 | 23.21731 | 0.192591 | 0.650857 |
| 115.7712 | 1.833515 | 1.071611 | 419.6778 | 60.00577 | 23.21823 | 0.192598 | 0.651002 |
| 115.8325 | 1.833588 | 1.071652 | 419.7349 | 60.00808 | 23.21915 | 0.192605 | 0.651148 |
| 115.8938 | 1.83366  | 1.071694 | 419.7919 | 60.01038 | 23.22007 | 0.192613 | 0.651294 |
| 115.9551 | 1.833732 | 1.071735 | 419.8488 | 60.01269 | 23.22099 | 0.19262  | 0.651439 |
| 116.0163 | 1.833804 | 1.071776 | 419.9057 | 60.01499 | 23.2219  | 0.192628 | 0.651584 |
| 116.0776 | 1.833876 | 1.071817 | 419.9625 | 60.01729 | 23.22282 | 0.192635 | 0.651729 |
| 116.1389 | 1.833948 | 1.071858 | 420.0192 | 60.01958 | 23.22373 | 0.192642 | 0.651874 |
| 116.2002 | 1.83402  | 1.071899 | 420.0759 | 60.02187 | 23.22464 | 0.19265  | 0.652019 |
| 116.2615 | 1.834092 | 1.071939 | 420.1325 | 60.02416 | 23.22555 | 0.192657 | 0.652164 |
| 116.3228 | 1.834163 | 1.07198  | 420.189  | 60.02645 | 23.22646 | 0.192664 | 0.652309 |
| 116.3841 | 1.834235 | 1.072021 | 420.2454 | 60.02873 | 23.22737 | 0.192672 | 0.652453 |
| 116.4454 | 1.834306 | 1.072062 | 420.3018 | 60.03101 | 23.22828 | 0.192679 | 0.652597 |
| 116.5066 | 1.834378 | 1.072102 | 420.3581 | 60.03329 | 23.22919 | 0.192686 | 0.652742 |
| 116.5679 | 1.834449 | 1.072143 | 420.4143 | 60.03557 | 23.23009 | 0.192694 | 0.652886 |
| 116.6292 | 1.83452  | 1.072184 | 420.4705 | 60.03784 | 23.231   | 0.192701 | 0.65303  |
| 116.6905 | 1.834591 | 1.072224 | 420.5266 | 60.04011 | 23.2319  | 0.192708 | 0.653174 |
| 116.7518 | 1.834662 | 1.072265 | 420.5826 | 60.04238 | 23.2328  | 0.192716 | 0.653317 |
| 116.8131 | 1.834733 | 1.072305 | 420.6386 | 60.04464 | 23.23371 | 0.192723 | 0.653461 |
| 116.8744 | 1.834804 | 1.072345 | 420.6945 | 60.0469  | 23.23461 | 0.19273  | 0.653604 |
| 116.9356 | 1.834875 | 1.072386 | 420.7503 | 60.04916 | 23.2355  | 0.192737 | 0.653748 |
| 116.9969 | 1.834946 | 1.072426 | 420.8061 | 60.05142 | 23.2364  | 0.192745 | 0.653891 |
| 117.0582 | 1.835016 | 1.072466 | 420.8618 | 60.05367 | 23.2373  | 0.192752 | 0.654034 |
| 117.1195 | 1.835087 | 1.072506 | 420.9174 | 60.05592 | 23.2382  | 0.192759 | 0.654177 |
| 117.1808 | 1.835157 | 1.072546 | 420.9729 | 60.05817 | 23.23909 | 0.192766 | 0.654319 |
| 117.2421 | 1.835227 | 1.072587 | 421.0284 | 60.06041 | 23.23998 | 0.192774 | 0.654462 |
| 117.3034 | 1.835298 | 1.072627 | 421.0838 | 60.06265 | 23.24088 | 0.192781 | 0.654605 |
| 117.3647 | 1.835368 | 1.072667 | 421.1391 | 60.06489 | 23.24177 | 0.192788 | 0.654747 |
| 117.4259 | 1.835438 | 1.072706 | 421.1944 | 60.06713 | 23.24266 | 0.192795 | 0.654889 |
| 117.4872 | 1.835508 | 1.072746 | 421.2496 | 60.06936 | 23.24355 | 0.192802 | 0.655031 |
| 117.5485 | 1.835578 | 1.072786 | 421.3047 | 60.07159 | 23.24443 | 0.192809 | 0.655173 |
| 117.6098 | 1.835648 | 1.072826 | 421.3598 | 60.07382 | 23.24532 | 0.192817 | 0.655315 |
| 117.6711 | 1.835717 | 1.072866 | 421.4148 | 60.07604 | 23.24621 | 0.192824 | 0.655457 |
| 117.7324 | 1.835787 | 1.072905 | 421.4697 | 60.07827 | 23.24709 | 0.192831 | 0.655599 |
| 117.7937 | 1.835856 | 1.072945 | 421.5246 | 60.08049 | 23.24798 | 0.192838 | 0.65574  |
| 117.855  | 1.835926 | 1.072984 | 421.5794 | 60.0827  | 23.24886 | 0.192845 | 0.655881 |
| 117.9162 | 1.835995 | 1.073024 | 421.6341 | 60.08492 | 23.24974 | 0.192852 | 0.656023 |
| 117.9775 | 1.836065 | 1.073063 | 421.6888 | 60.08713 | 23.25062 | 0.192859 | 0.656164 |

|          |          |          |          |          |          |          |          |
|----------|----------|----------|----------|----------|----------|----------|----------|
| 118.0388 | 1.836134 | 1.073103 | 421.7434 | 60.08934 | 23.2515  | 0.192866 | 0.656305 |
| 118.1001 | 1.836203 | 1.073142 | 421.7979 | 60.09154 | 23.25238 | 0.192874 | 0.656446 |
| 118.1614 | 1.836272 | 1.073182 | 421.8524 | 60.09375 | 23.25325 | 0.192881 | 0.656586 |
| 118.2227 | 1.836341 | 1.073221 | 421.9067 | 60.09595 | 23.25413 | 0.192888 | 0.656727 |
| 118.284  | 1.83641  | 1.07326  | 421.9611 | 60.09814 | 23.25501 | 0.192895 | 0.656867 |
| 118.3453 | 1.836479 | 1.073299 | 422.0153 | 60.10034 | 23.25588 | 0.192902 | 0.657008 |
| 118.4065 | 1.836547 | 1.073338 | 422.0695 | 60.10253 | 23.25675 | 0.192909 | 0.657148 |
| 118.4678 | 1.836616 | 1.073378 | 422.1236 | 60.10472 | 23.25762 | 0.192916 | 0.657288 |
| 118.5291 | 1.836684 | 1.073417 | 422.1777 | 60.10691 | 23.25849 | 0.192923 | 0.657428 |
| 118.5904 | 1.836753 | 1.073456 | 422.2317 | 60.10909 | 23.25936 | 0.19293  | 0.657568 |
| 118.6517 | 1.836821 | 1.073494 | 422.2856 | 60.11127 | 23.26023 | 0.192937 | 0.657708 |
| 118.713  | 1.836889 | 1.073533 | 422.3394 | 60.11345 | 23.2611  | 0.192944 | 0.657847 |
| 118.7743 | 1.836958 | 1.073572 | 422.3932 | 60.11563 | 23.26197 | 0.192951 | 0.657987 |
| 118.8355 | 1.837026 | 1.073611 | 422.4469 | 60.1178  | 23.26283 | 0.192958 | 0.658126 |
| 118.8968 | 1.837094 | 1.07365  | 422.5006 | 60.11997 | 23.2637  | 0.192965 | 0.658265 |
| 118.9581 | 1.837162 | 1.073688 | 422.5542 | 60.12214 | 23.26456 | 0.192972 | 0.658404 |
| 119.0194 | 1.837229 | 1.073727 | 422.6077 | 60.12431 | 23.26542 | 0.192979 | 0.658543 |
| 119.0807 | 1.837297 | 1.073766 | 422.6611 | 60.12647 | 23.26628 | 0.192986 | 0.658682 |
| 119.142  | 1.837365 | 1.073804 | 422.7145 | 60.12863 | 23.26714 | 0.192993 | 0.65882  |
| 119.2033 | 1.837432 | 1.073843 | 422.7678 | 60.13079 | 23.268   | 0.193    | 0.658959 |
| 119.2646 | 1.8375   | 1.073881 | 422.8211 | 60.13294 | 23.26886 | 0.193007 | 0.659097 |
| 119.3258 | 1.837567 | 1.07392  | 422.8743 | 60.13509 | 23.26971 | 0.193013 | 0.659236 |
| 119.3871 | 1.837635 | 1.073958 | 422.9274 | 60.13724 | 23.27057 | 0.19302  | 0.659374 |
| 119.4484 | 1.837702 | 1.073996 | 422.9805 | 60.13939 | 23.27143 | 0.193027 | 0.659512 |
| 119.5097 | 1.837769 | 1.074035 | 423.0334 | 60.14153 | 23.27228 | 0.193034 | 0.65965  |
| 119.571  | 1.837836 | 1.074073 | 423.0864 | 60.14367 | 23.27313 | 0.193041 | 0.659788 |
| 119.6323 | 1.837903 | 1.074111 | 423.1392 | 60.14581 | 23.27398 | 0.193048 | 0.659925 |
| 119.6936 | 1.83797  | 1.074149 | 423.192  | 60.14795 | 23.27483 | 0.193055 | 0.660063 |
| 119.7549 | 1.838037 | 1.074187 | 423.2447 | 60.15008 | 23.27568 | 0.193062 | 0.6602   |
| 119.8161 | 1.838104 | 1.074225 | 423.2974 | 60.15221 | 23.27653 | 0.193068 | 0.660338 |
| 119.8774 | 1.83817  | 1.074263 | 423.35   | 60.15434 | 23.27738 | 0.193075 | 0.660475 |
| 119.9387 | 1.838237 | 1.074301 | 423.4025 | 60.15647 | 23.27822 | 0.193082 | 0.660612 |
| 120      | 1.838304 | 1.074339 | 423.455  | 60.15859 | 23.27907 | 0.193089 | 0.660749 |
| 120.0613 | 1.83837  | 1.074377 | 423.5074 | 60.16071 | 23.27991 | 0.193096 | 0.660886 |
| 120.1226 | 1.838436 | 1.074415 | 423.5597 | 60.16283 | 23.28076 | 0.193103 | 0.661022 |
| 120.1839 | 1.838503 | 1.074452 | 423.612  | 60.16494 | 23.2816  | 0.193109 | 0.661159 |
| 120.2451 | 1.838569 | 1.07449  | 423.6642 | 60.16705 | 23.28244 | 0.193116 | 0.661295 |
| 120.3064 | 1.838635 | 1.074528 | 423.7163 | 60.16916 | 23.28328 | 0.193123 | 0.661432 |
| 120.3677 | 1.838701 | 1.074565 | 423.7684 | 60.17127 | 23.28412 | 0.19313  | 0.661568 |
| 120.429  | 1.838767 | 1.074603 | 423.8204 | 60.17337 | 23.28496 | 0.193136 | 0.661704 |
| 120.4903 | 1.838833 | 1.074641 | 423.8724 | 60.17548 | 23.28579 | 0.193143 | 0.66184  |
| 120.5516 | 1.838899 | 1.074678 | 423.9243 | 60.17757 | 23.28663 | 0.19315  | 0.661976 |
| 120.6129 | 1.838964 | 1.074715 | 423.9761 | 60.17967 | 23.28746 | 0.193157 | 0.662111 |
| 120.6742 | 1.83903  | 1.074753 | 424.0278 | 60.18176 | 23.2883  | 0.193163 | 0.662247 |
| 120.7354 | 1.839095 | 1.07479  | 424.0795 | 60.18386 | 23.28913 | 0.19317  | 0.662382 |
| 120.7967 | 1.839161 | 1.074827 | 424.1311 | 60.18594 | 23.28996 | 0.193177 | 0.662517 |
| 120.858  | 1.839226 | 1.074865 | 424.1827 | 60.18803 | 23.29079 | 0.193184 | 0.662653 |

|          |          |          |          |          |          |          |          |
|----------|----------|----------|----------|----------|----------|----------|----------|
| 120.9193 | 1.839291 | 1.074902 | 424.2342 | 60.19011 | 23.29162 | 0.19319  | 0.662788 |
| 120.9806 | 1.839357 | 1.074939 | 424.2856 | 60.1922  | 23.29245 | 0.193197 | 0.662923 |
| 121.0419 | 1.839422 | 1.074976 | 424.337  | 60.19427 | 23.29328 | 0.193204 | 0.663057 |
| 121.1032 | 1.839487 | 1.075013 | 424.3883 | 60.19635 | 23.2941  | 0.19321  | 0.663192 |
| 121.1645 | 1.839552 | 1.07505  | 424.4395 | 60.19842 | 23.29493 | 0.193217 | 0.663327 |
| 121.2257 | 1.839617 | 1.075087 | 424.4907 | 60.20049 | 23.29575 | 0.193224 | 0.663461 |
| 121.287  | 1.839681 | 1.075124 | 424.5418 | 60.20256 | 23.29658 | 0.19323  | 0.663596 |
| 121.3483 | 1.839746 | 1.075161 | 424.5929 | 60.20463 | 23.2974  | 0.193237 | 0.66373  |
| 121.4096 | 1.839811 | 1.075198 | 424.6439 | 60.20669 | 23.29822 | 0.193243 | 0.663864 |
| 121.4709 | 1.839875 | 1.075235 | 424.6948 | 60.20875 | 23.29904 | 0.19325  | 0.663998 |
| 121.5322 | 1.83994  | 1.075271 | 424.7456 | 60.21081 | 23.29986 | 0.193257 | 0.664132 |
| 121.5935 | 1.840004 | 1.075308 | 424.7964 | 60.21286 | 23.30068 | 0.193263 | 0.664265 |
| 121.6547 | 1.840069 | 1.075345 | 424.8472 | 60.21492 | 23.3015  | 0.19327  | 0.664399 |
| 121.716  | 1.840133 | 1.075381 | 424.8978 | 60.21697 | 23.30231 | 0.193277 | 0.664532 |
| 121.7773 | 1.840197 | 1.075418 | 424.9484 | 60.21901 | 23.30313 | 0.193283 | 0.664666 |
| 121.8386 | 1.840261 | 1.075454 | 424.999  | 60.22106 | 23.30394 | 0.19329  | 0.664799 |
| 121.8999 | 1.840325 | 1.075491 | 425.0495 | 60.2231  | 23.30475 | 0.193296 | 0.664932 |
| 121.9612 | 1.840389 | 1.075527 | 425.0999 | 60.22514 | 23.30557 | 0.193303 | 0.665065 |
| 122.0225 | 1.840453 | 1.075563 | 425.1502 | 60.22718 | 23.30638 | 0.193309 | 0.665198 |
| 122.0838 | 1.840517 | 1.0756   | 425.2005 | 60.22921 | 23.30719 | 0.193316 | 0.665331 |
| 122.145  | 1.84058  | 1.075636 | 425.2507 | 60.23125 | 23.308   | 0.193322 | 0.665463 |
| 122.2063 | 1.840644 | 1.075672 | 425.3009 | 60.23328 | 23.30881 | 0.193329 | 0.665596 |
| 122.2676 | 1.840707 | 1.075708 | 425.351  | 60.2353  | 23.30961 | 0.193335 | 0.665728 |
| 122.3289 | 1.840771 | 1.075745 | 425.401  | 60.23733 | 23.31042 | 0.193342 | 0.66586  |
| 122.3902 | 1.840834 | 1.075781 | 425.451  | 60.23935 | 23.31122 | 0.193348 | 0.665992 |
| 122.4515 | 1.840898 | 1.075817 | 425.5009 | 60.24137 | 23.31203 | 0.193355 | 0.666124 |
| 122.5128 | 1.840961 | 1.075853 | 425.5508 | 60.24339 | 23.31283 | 0.193361 | 0.666256 |
| 122.5741 | 1.841024 | 1.075889 | 425.6006 | 60.2454  | 23.31363 | 0.193368 | 0.666388 |
| 122.6353 | 1.841087 | 1.075925 | 425.6503 | 60.24741 | 23.31443 | 0.193374 | 0.66652  |
| 122.6966 | 1.84115  | 1.075961 | 425.7    | 60.24942 | 23.31523 | 0.193381 | 0.666651 |
| 122.7579 | 1.841213 | 1.075996 | 425.7496 | 60.25143 | 23.31603 | 0.193387 | 0.666783 |
| 122.8192 | 1.841276 | 1.076032 | 425.7991 | 60.25343 | 23.31683 | 0.193394 | 0.666914 |
| 122.8805 | 1.841338 | 1.076068 | 425.8486 | 60.25544 | 23.31763 | 0.1934   | 0.667045 |
| 122.9418 | 1.841401 | 1.076104 | 425.898  | 60.25744 | 23.31842 | 0.193407 | 0.667176 |
| 123.0031 | 1.841464 | 1.076139 | 425.9474 | 60.25943 | 23.31922 | 0.193413 | 0.667307 |
| 123.0644 | 1.841526 | 1.076175 | 425.9967 | 60.26143 | 23.32001 | 0.193419 | 0.667438 |
| 123.1256 | 1.841589 | 1.07621  | 426.0459 | 60.26342 | 23.32081 | 0.193426 | 0.667569 |
| 123.1869 | 1.841651 | 1.076246 | 426.0951 | 60.26541 | 23.3216  | 0.193432 | 0.667699 |
| 123.2482 | 1.841713 | 1.076281 | 426.1442 | 60.2674  | 23.32239 | 0.193439 | 0.66783  |
| 123.3095 | 1.841775 | 1.076317 | 426.1932 | 60.26938 | 23.32318 | 0.193445 | 0.66796  |
| 123.3708 | 1.841837 | 1.076352 | 426.2422 | 60.27136 | 23.32397 | 0.193451 | 0.66809  |
| 123.4321 | 1.841899 | 1.076388 | 426.2911 | 60.27334 | 23.32476 | 0.193458 | 0.66822  |
| 123.4934 | 1.841961 | 1.076423 | 426.34   | 60.27532 | 23.32555 | 0.193464 | 0.66835  |
| 123.5546 | 1.842023 | 1.076458 | 426.3888 | 60.2773  | 23.32633 | 0.19347  | 0.66848  |
| 123.6159 | 1.842085 | 1.076493 | 426.4376 | 60.27927 | 23.32712 | 0.193477 | 0.66861  |
| 123.6772 | 1.842147 | 1.076528 | 426.4862 | 60.28124 | 23.3279  | 0.193483 | 0.668739 |
| 123.7385 | 1.842209 | 1.076564 | 426.5349 | 60.2832  | 23.32869 | 0.193489 | 0.668869 |

|          |          |          |          |          |          |          |          |
|----------|----------|----------|----------|----------|----------|----------|----------|
| 123.7998 | 1.84227  | 1.076599 | 426.5834 | 60.28517 | 23.32947 | 0.193496 | 0.668998 |
| 123.8611 | 1.842332 | 1.076634 | 426.6319 | 60.28713 | 23.33025 | 0.193502 | 0.669127 |
| 123.9224 | 1.842393 | 1.076669 | 426.6804 | 60.28909 | 23.33103 | 0.193508 | 0.669257 |
| 123.9837 | 1.842454 | 1.076704 | 426.7287 | 60.29105 | 23.33181 | 0.193515 | 0.669386 |
| 124.0449 | 1.842516 | 1.076739 | 426.7771 | 60.293   | 23.33259 | 0.193521 | 0.669515 |
| 124.1062 | 1.842577 | 1.076773 | 426.8253 | 60.29496 | 23.33336 | 0.193527 | 0.669643 |
| 124.1675 | 1.842638 | 1.076808 | 426.8735 | 60.29691 | 23.33414 | 0.193533 | 0.669772 |
| 124.2288 | 1.842699 | 1.076843 | 426.9216 | 60.29885 | 23.33492 | 0.19354  | 0.669901 |
| 124.2901 | 1.84276  | 1.076878 | 426.9697 | 60.3008  | 23.33569 | 0.193546 | 0.670029 |
| 124.3514 | 1.842821 | 1.076912 | 427.0177 | 60.30274 | 23.33646 | 0.193552 | 0.670157 |
| 124.4127 | 1.842882 | 1.076947 | 427.0657 | 60.30468 | 23.33724 | 0.193558 | 0.670285 |
| 124.474  | 1.842942 | 1.076982 | 427.1136 | 60.30662 | 23.33801 | 0.193565 | 0.670414 |
| 124.5352 | 1.843003 | 1.077016 | 427.1614 | 60.30856 | 23.33878 | 0.193571 | 0.670542 |
| 124.5965 | 1.843064 | 1.077051 | 427.2092 | 60.31049 | 23.33955 | 0.193577 | 0.670669 |
| 124.6578 | 1.843124 | 1.077085 | 427.2569 | 60.31242 | 23.34032 | 0.193583 | 0.670797 |
| 124.7191 | 1.843185 | 1.07712  | 427.3045 | 60.31435 | 23.34109 | 0.193589 | 0.670925 |
| 124.7804 | 1.843245 | 1.077154 | 427.3521 | 60.31627 | 23.34185 | 0.193596 | 0.671052 |
| 124.8417 | 1.843305 | 1.077188 | 427.3997 | 60.3182  | 23.34262 | 0.193602 | 0.67118  |
| 124.903  | 1.843365 | 1.077223 | 427.4471 | 60.32012 | 23.34338 | 0.193608 | 0.671307 |
| 124.9642 | 1.843425 | 1.077257 | 427.4946 | 60.32204 | 23.34415 | 0.193614 | 0.671434 |
| 125.0255 | 1.843486 | 1.077291 | 427.5419 | 60.32395 | 23.34491 | 0.19362  | 0.671561 |
| 125.0868 | 1.843545 | 1.077325 | 427.5892 | 60.32587 | 23.34567 | 0.193626 | 0.671688 |
| 125.1481 | 1.843605 | 1.077359 | 427.6364 | 60.32778 | 23.34643 | 0.193633 | 0.671815 |
| 125.2094 | 1.843665 | 1.077393 | 427.6836 | 60.32969 | 23.34719 | 0.193639 | 0.671941 |
| 125.2707 | 1.843725 | 1.077427 | 427.7307 | 60.33159 | 23.34795 | 0.193645 | 0.672068 |
| 125.332  | 1.843785 | 1.077461 | 427.7778 | 60.3335  | 23.34871 | 0.193651 | 0.672194 |
| 125.3933 | 1.843844 | 1.077495 | 427.8248 | 60.3354  | 23.34947 | 0.193657 | 0.672321 |
| 125.4545 | 1.843904 | 1.077529 | 427.8717 | 60.3373  | 23.35022 | 0.193663 | 0.672447 |
| 125.5158 | 1.843963 | 1.077563 | 427.9186 | 60.3392  | 23.35098 | 0.193669 | 0.672573 |
| 125.5771 | 1.844023 | 1.077597 | 427.9654 | 60.34109 | 23.35173 | 0.193675 | 0.672699 |
| 125.6384 | 1.844082 | 1.077631 | 428.0122 | 60.34298 | 23.35249 | 0.193681 | 0.672825 |
| 125.6997 | 1.844141 | 1.077664 | 428.0589 | 60.34487 | 23.35324 | 0.193687 | 0.672951 |
| 125.761  | 1.8442   | 1.077698 | 428.1055 | 60.34676 | 23.35399 | 0.193694 | 0.673076 |
| 125.8223 | 1.844259 | 1.077732 | 428.1521 | 60.34865 | 23.35474 | 0.1937   | 0.673202 |
| 125.8836 | 1.844318 | 1.077765 | 428.1986 | 60.35053 | 23.35549 | 0.193706 | 0.673327 |
| 125.9448 | 1.844377 | 1.077799 | 428.2451 | 60.35241 | 23.35624 | 0.193712 | 0.673452 |
| 126.0061 | 1.844436 | 1.077832 | 428.2915 | 60.35429 | 23.35699 | 0.193718 | 0.673578 |
| 126.0674 | 1.844495 | 1.077866 | 428.3379 | 60.35616 | 23.35774 | 0.193724 | 0.673703 |
| 126.1287 | 1.844554 | 1.077899 | 428.3842 | 60.35804 | 23.35848 | 0.19373  | 0.673828 |
| 126.19   | 1.844612 | 1.077933 | 428.4304 | 60.35991 | 23.35923 | 0.193736 | 0.673952 |
| 126.2513 | 1.844671 | 1.077966 | 428.4766 | 60.36177 | 23.35997 | 0.193742 | 0.674077 |
| 126.3126 | 1.844729 | 1.077999 | 428.5227 | 60.36364 | 23.36071 | 0.193748 | 0.674202 |
| 126.3739 | 1.844788 | 1.078033 | 428.5687 | 60.3655  | 23.36146 | 0.193754 | 0.674326 |
| 126.4351 | 1.844846 | 1.078066 | 428.6147 | 60.36737 | 23.3622  | 0.19376  | 0.67445  |
| 126.4964 | 1.844904 | 1.078099 | 428.6607 | 60.36923 | 23.36294 | 0.193766 | 0.674575 |
| 126.5577 | 1.844963 | 1.078132 | 428.7067 | 60.37109 | 23.36368 | 0.193772 | 0.674699 |
| 126.619  | 1.845021 | 1.078165 | 428.7525 | 60.37294 | 23.36442 | 0.193778 | 0.674823 |

|          |          |          |          |          |          |          |          |
|----------|----------|----------|----------|----------|----------|----------|----------|
| 126.6803 | 1.845079 | 1.078199 | 428.7984 | 60.3748  | 23.36516 | 0.193784 | 0.674947 |
| 126.7416 | 1.845137 | 1.078232 | 428.8441 | 60.37665 | 23.36589 | 0.19379  | 0.675071 |
| 126.8029 | 1.845195 | 1.078265 | 428.8898 | 60.3785  | 23.36663 | 0.193796 | 0.675194 |
| 126.8641 | 1.845253 | 1.078298 | 428.9355 | 60.38035 | 23.36737 | 0.193801 | 0.675318 |
| 126.9254 | 1.845311 | 1.078331 | 428.9811 | 60.38219 | 23.3681  | 0.193807 | 0.675441 |
| 126.9867 | 1.845368 | 1.078363 | 429.0266 | 60.38403 | 23.36883 | 0.193813 | 0.675565 |
| 127.048  | 1.845426 | 1.078396 | 429.0721 | 60.38587 | 23.36957 | 0.193819 | 0.675688 |
| 127.1093 | 1.845484 | 1.078429 | 429.1175 | 60.38771 | 23.3703  | 0.193825 | 0.675811 |
| 127.1706 | 1.845541 | 1.078462 | 429.1629 | 60.38955 | 23.37103 | 0.193831 | 0.675934 |
| 127.2319 | 1.845599 | 1.078495 | 429.2082 | 60.39138 | 23.37176 | 0.193837 | 0.676057 |
| 127.2932 | 1.845656 | 1.078527 | 429.2535 | 60.39321 | 23.37249 | 0.193843 | 0.67618  |
| 127.3544 | 1.845713 | 1.07856  | 429.2987 | 60.39504 | 23.37322 | 0.193849 | 0.676302 |
| 127.4157 | 1.845771 | 1.078593 | 429.3438 | 60.39687 | 23.37395 | 0.193855 | 0.676425 |
| 127.477  | 1.845828 | 1.078625 | 429.3889 | 60.39869 | 23.37467 | 0.19386  | 0.676547 |
| 127.5383 | 1.845885 | 1.078658 | 429.434  | 60.40052 | 23.3754  | 0.193866 | 0.67667  |
| 127.5996 | 1.845942 | 1.07869  | 429.4789 | 60.40234 | 23.37612 | 0.193872 | 0.676792 |
| 127.6609 | 1.845999 | 1.078723 | 429.5239 | 60.40415 | 23.37685 | 0.193878 | 0.676914 |
| 127.7222 | 1.846056 | 1.078755 | 429.5687 | 60.40597 | 23.37757 | 0.193884 | 0.677036 |
| 127.7835 | 1.846113 | 1.078787 | 429.6135 | 60.40778 | 23.37829 | 0.19389  | 0.677158 |
| 127.8447 | 1.846169 | 1.07882  | 429.6583 | 60.40959 | 23.37901 | 0.193895 | 0.67728  |
| 127.906  | 1.846226 | 1.078852 | 429.703  | 60.4114  | 23.37973 | 0.193901 | 0.677401 |
| 127.9673 | 1.846283 | 1.078884 | 429.7477 | 60.41321 | 23.38045 | 0.193907 | 0.677523 |
| 128.0286 | 1.846339 | 1.078916 | 429.7922 | 60.41501 | 23.38117 | 0.193913 | 0.677644 |
| 128.0899 | 1.846396 | 1.078949 | 429.8368 | 60.41682 | 23.38189 | 0.193919 | 0.677765 |
| 128.1512 | 1.846452 | 1.078981 | 429.8813 | 60.41862 | 23.38261 | 0.193924 | 0.677887 |
| 128.2125 | 1.846509 | 1.079013 | 429.9257 | 60.42041 | 23.38332 | 0.19393  | 0.678008 |
| 128.2737 | 1.846565 | 1.079045 | 429.97   | 60.42221 | 23.38404 | 0.193936 | 0.678129 |
| 128.335  | 1.846621 | 1.079077 | 430.0144 | 60.424   | 23.38475 | 0.193942 | 0.67825  |
| 128.3963 | 1.846677 | 1.079109 | 430.0586 | 60.42579 | 23.38546 | 0.193947 | 0.67837  |
| 128.4576 | 1.846733 | 1.079141 | 430.1028 | 60.42758 | 23.38618 | 0.193953 | 0.678491 |
| 128.5189 | 1.846789 | 1.079173 | 430.147  | 60.42937 | 23.38689 | 0.193959 | 0.678611 |
| 128.5802 | 1.846845 | 1.079205 | 430.1911 | 60.43115 | 23.3876  | 0.193965 | 0.678732 |
| 128.6415 | 1.846901 | 1.079236 | 430.2351 | 60.43294 | 23.38831 | 0.19397  | 0.678852 |
| 128.7028 | 1.846957 | 1.079268 | 430.2791 | 60.43472 | 23.38902 | 0.193976 | 0.678972 |
| 128.764  | 1.847012 | 1.0793   | 430.323  | 60.43649 | 23.38972 | 0.193982 | 0.679092 |
| 128.8253 | 1.847068 | 1.079332 | 430.3669 | 60.43827 | 23.39043 | 0.193988 | 0.679212 |
| 128.8866 | 1.847124 | 1.079363 | 430.4107 | 60.44004 | 23.39114 | 0.193993 | 0.679332 |
| 128.9479 | 1.847179 | 1.079395 | 430.4545 | 60.44181 | 23.39184 | 0.193999 | 0.679452 |
| 129.0092 | 1.847235 | 1.079426 | 430.4982 | 60.44358 | 23.39255 | 0.194005 | 0.679572 |
| 129.0705 | 1.84729  | 1.079458 | 430.5419 | 60.44535 | 23.39325 | 0.19401  | 0.679691 |
| 129.1318 | 1.847345 | 1.079489 | 430.5855 | 60.44711 | 23.39395 | 0.194016 | 0.679811 |
| 129.1931 | 1.8474   | 1.079521 | 430.629  | 60.44888 | 23.39466 | 0.194022 | 0.67993  |
| 129.2543 | 1.847456 | 1.079552 | 430.6725 | 60.45064 | 23.39536 | 0.194027 | 0.680049 |
| 129.3156 | 1.847511 | 1.079584 | 430.7159 | 60.45239 | 23.39606 | 0.194033 | 0.680168 |
| 129.3769 | 1.847566 | 1.079615 | 430.7593 | 60.45415 | 23.39676 | 0.194039 | 0.680287 |
| 129.4382 | 1.847621 | 1.079646 | 430.8027 | 60.4559  | 23.39745 | 0.194044 | 0.680406 |
| 129.4995 | 1.847676 | 1.079678 | 430.8459 | 60.45765 | 23.39815 | 0.19405  | 0.680525 |

|          |          |          |          |          |          |          |          |
|----------|----------|----------|----------|----------|----------|----------|----------|
| 129.5608 | 1.84773  | 1.079709 | 430.8892 | 60.4594  | 23.39885 | 0.194055 | 0.680644 |
| 129.6221 | 1.847785 | 1.07974  | 430.9323 | 60.46115 | 23.39954 | 0.194061 | 0.680762 |
| 129.6834 | 1.84784  | 1.079771 | 430.9755 | 60.4629  | 23.40024 | 0.194067 | 0.680881 |
| 129.7446 | 1.847895 | 1.079802 | 431.0185 | 60.46464 | 23.40093 | 0.194072 | 0.680999 |
| 129.8059 | 1.847949 | 1.079833 | 431.0615 | 60.46638 | 23.40163 | 0.194078 | 0.681117 |
| 129.8672 | 1.848004 | 1.079864 | 431.1045 | 60.46812 | 23.40232 | 0.194083 | 0.681235 |
| 129.9285 | 1.848058 | 1.079895 | 431.1474 | 60.46985 | 23.40301 | 0.194089 | 0.681353 |
| 129.9898 | 1.848112 | 1.079926 | 431.1902 | 60.47159 | 23.4037  | 0.194095 | 0.681471 |
| 130.0511 | 1.848167 | 1.079957 | 431.233  | 60.47332 | 23.40439 | 0.1941   | 0.681589 |
| 130.1124 | 1.848221 | 1.079988 | 431.2758 | 60.47505 | 23.40508 | 0.194106 | 0.681707 |
| 130.1736 | 1.848275 | 1.080019 | 431.3185 | 60.47678 | 23.40577 | 0.194111 | 0.681824 |
| 130.2349 | 1.848329 | 1.08005  | 431.3611 | 60.4785  | 23.40645 | 0.194117 | 0.681942 |
| 130.2962 | 1.848383 | 1.080081 | 431.4037 | 60.48023 | 23.40714 | 0.194122 | 0.682059 |
| 130.3575 | 1.848437 | 1.080111 | 431.4462 | 60.48195 | 23.40783 | 0.194128 | 0.682176 |
| 130.4188 | 1.848491 | 1.080142 | 431.4887 | 60.48367 | 23.40851 | 0.194133 | 0.682293 |
| 130.4801 | 1.848545 | 1.080173 | 431.5311 | 60.48538 | 23.40919 | 0.194139 | 0.68241  |
| 130.5414 | 1.848598 | 1.080203 | 431.5735 | 60.4871  | 23.40988 | 0.194144 | 0.682527 |
| 130.6027 | 1.848652 | 1.080234 | 431.6158 | 60.48881 | 23.41056 | 0.19415  | 0.682644 |
| 130.6639 | 1.848706 | 1.080264 | 431.6581 | 60.49052 | 23.41124 | 0.194155 | 0.682761 |
| 130.7252 | 1.848759 | 1.080295 | 431.7003 | 60.49223 | 23.41192 | 0.194161 | 0.682877 |
| 130.7865 | 1.848813 | 1.080325 | 431.7425 | 60.49394 | 23.4126  | 0.194166 | 0.682994 |
| 130.8478 | 1.848866 | 1.080356 | 431.7846 | 60.49564 | 23.41328 | 0.194172 | 0.68311  |
| 130.9091 | 1.848919 | 1.080386 | 431.8267 | 60.49734 | 23.41396 | 0.194177 | 0.683226 |
| 130.9704 | 1.848973 | 1.080416 | 431.8687 | 60.49904 | 23.41463 | 0.194183 | 0.683343 |
| 131.0317 | 1.849026 | 1.080447 | 431.9106 | 60.50074 | 23.41531 | 0.194188 | 0.683459 |
| 131.093  | 1.849079 | 1.080477 | 431.9525 | 60.50244 | 23.41598 | 0.194194 | 0.683575 |
| 131.1542 | 1.849132 | 1.080507 | 431.9944 | 60.50413 | 23.41666 | 0.194199 | 0.68369  |
| 131.2155 | 1.849185 | 1.080537 | 432.0362 | 60.50582 | 23.41733 | 0.194205 | 0.683806 |
| 131.2768 | 1.849238 | 1.080568 | 432.0779 | 60.50751 | 23.41801 | 0.19421  | 0.683922 |
| 131.3381 | 1.849291 | 1.080598 | 432.1196 | 60.5092  | 23.41868 | 0.194215 | 0.684037 |
| 131.3994 | 1.849344 | 1.080628 | 432.1613 | 60.51088 | 23.41935 | 0.194221 | 0.684153 |
| 131.4607 | 1.849397 | 1.080658 | 432.2028 | 60.51257 | 23.42002 | 0.194226 | 0.684268 |
| 131.522  | 1.849449 | 1.080688 | 432.2444 | 60.51425 | 23.42069 | 0.194232 | 0.684383 |
| 131.5832 | 1.849502 | 1.080718 | 432.2859 | 60.51593 | 23.42136 | 0.194237 | 0.684498 |
| 131.6445 | 1.849554 | 1.080748 | 432.3273 | 60.5176  | 23.42202 | 0.194242 | 0.684613 |
| 131.7058 | 1.849607 | 1.080778 | 432.3687 | 60.51928 | 23.42269 | 0.194248 | 0.684728 |
| 131.7671 | 1.849659 | 1.080808 | 432.41   | 60.52095 | 23.42336 | 0.194253 | 0.684843 |
| 131.8284 | 1.849712 | 1.080837 | 432.4513 | 60.52262 | 23.42402 | 0.194259 | 0.684958 |
| 131.8897 | 1.849764 | 1.080867 | 432.4925 | 60.52429 | 23.42469 | 0.194264 | 0.685072 |
| 131.951  | 1.849816 | 1.080897 | 432.5337 | 60.52596 | 23.42535 | 0.194269 | 0.685187 |
| 132.0123 | 1.849868 | 1.080927 | 432.5748 | 60.52762 | 23.42601 | 0.194275 | 0.685301 |
| 132.0735 | 1.849921 | 1.080956 | 432.6159 | 60.52928 | 23.42668 | 0.19428  | 0.685415 |
| 132.1348 | 1.849973 | 1.080986 | 432.6569 | 60.53094 | 23.42734 | 0.194285 | 0.685529 |
| 132.1961 | 1.850025 | 1.081016 | 432.6979 | 60.5326  | 23.428   | 0.194291 | 0.685643 |
| 132.2574 | 1.850076 | 1.081045 | 432.7388 | 60.53426 | 23.42866 | 0.194296 | 0.685757 |
| 132.3187 | 1.850128 | 1.081075 | 432.7797 | 60.53591 | 23.42932 | 0.194301 | 0.685871 |
| 132.38   | 1.85018  | 1.081104 | 432.8205 | 60.53756 | 23.42997 | 0.194307 | 0.685985 |

|          |          |          |          |          |          |          |          |
|----------|----------|----------|----------|----------|----------|----------|----------|
| 132.4413 | 1.850232 | 1.081134 | 432.8613 | 60.53921 | 23.43063 | 0.194312 | 0.686098 |
| 132.5026 | 1.850283 | 1.081163 | 432.902  | 60.54086 | 23.43129 | 0.194317 | 0.686212 |
| 132.5638 | 1.850335 | 1.081192 | 432.9427 | 60.54251 | 23.43194 | 0.194322 | 0.686325 |
| 132.6251 | 1.850387 | 1.081222 | 432.9833 | 60.54415 | 23.4326  | 0.194328 | 0.686439 |
| 132.6864 | 1.850438 | 1.081251 | 433.0238 | 60.54579 | 23.43325 | 0.194333 | 0.686552 |
| 132.7477 | 1.850489 | 1.08128  | 433.0644 | 60.54743 | 23.4339  | 0.194338 | 0.686665 |
| 132.809  | 1.850541 | 1.081309 | 433.1048 | 60.54907 | 23.43456 | 0.194344 | 0.686778 |
| 132.8703 | 1.850592 | 1.081339 | 433.1452 | 60.5507  | 23.43521 | 0.194349 | 0.686891 |
| 132.9316 | 1.850643 | 1.081368 | 433.1856 | 60.55234 | 23.43586 | 0.194354 | 0.687003 |
| 132.9928 | 1.850694 | 1.081397 | 433.2259 | 60.55397 | 23.43651 | 0.194359 | 0.687116 |
| 133.0541 | 1.850745 | 1.081426 | 433.2662 | 60.5556  | 23.43716 | 0.194365 | 0.687229 |
| 133.1154 | 1.850796 | 1.081455 | 433.3064 | 60.55723 | 23.4378  | 0.19437  | 0.687341 |
| 133.1767 | 1.850847 | 1.081484 | 433.3466 | 60.55885 | 23.43845 | 0.194375 | 0.687453 |
| 133.238  | 1.850898 | 1.081513 | 433.3867 | 60.56047 | 23.4391  | 0.19438  | 0.687566 |
| 133.2993 | 1.850949 | 1.081542 | 433.4267 | 60.5621  | 23.43974 | 0.194385 | 0.687678 |
| 133.3606 | 1.851    | 1.081571 | 433.4667 | 60.56372 | 23.44039 | 0.194391 | 0.68779  |
| 133.4219 | 1.85105  | 1.0816   | 433.5067 | 60.56533 | 23.44103 | 0.194396 | 0.687902 |
| 133.4831 | 1.851101 | 1.081629 | 433.5466 | 60.56695 | 23.44168 | 0.194401 | 0.688014 |
| 133.5444 | 1.851152 | 1.081657 | 433.5865 | 60.56856 | 23.44232 | 0.194406 | 0.688125 |
| 133.6057 | 1.851202 | 1.081686 | 433.6263 | 60.57017 | 23.44296 | 0.194411 | 0.688237 |
| 133.667  | 1.851253 | 1.081715 | 433.6661 | 60.57178 | 23.4436  | 0.194417 | 0.688349 |
| 133.7283 | 1.851303 | 1.081744 | 433.7058 | 60.57339 | 23.44424 | 0.194422 | 0.68846  |
| 133.7896 | 1.851353 | 1.081772 | 433.7454 | 60.57499 | 23.44488 | 0.194427 | 0.688571 |
| 133.8509 | 1.851404 | 1.081801 | 433.7851 | 60.5766  | 23.44552 | 0.194432 | 0.688682 |
| 133.9122 | 1.851454 | 1.081829 | 433.8246 | 60.5782  | 23.44616 | 0.194437 | 0.688794 |
| 133.9734 | 1.851504 | 1.081858 | 433.8641 | 60.5798  | 23.44679 | 0.194442 | 0.688905 |
| 134.0347 | 1.851554 | 1.081887 | 433.9036 | 60.5814  | 23.44743 | 0.194447 | 0.689015 |
| 134.096  | 1.851604 | 1.081915 | 433.943  | 60.58299 | 23.44806 | 0.194453 | 0.689126 |
| 134.1573 | 1.851654 | 1.081943 | 433.9824 | 60.58458 | 23.4487  | 0.194458 | 0.689237 |
| 134.2186 | 1.851704 | 1.081972 | 434.0217 | 60.58617 | 23.44933 | 0.194463 | 0.689348 |
| 134.2799 | 1.851754 | 1.082    | 434.061  | 60.58776 | 23.44997 | 0.194468 | 0.689458 |
| 134.3412 | 1.851803 | 1.082029 | 434.1002 | 60.58935 | 23.4506  | 0.194473 | 0.689568 |
| 134.4025 | 1.851853 | 1.082057 | 434.1394 | 60.59094 | 23.45123 | 0.194478 | 0.689679 |
| 134.4637 | 1.851903 | 1.082085 | 434.1785 | 60.59252 | 23.45186 | 0.194483 | 0.689789 |
| 134.525  | 1.851952 | 1.082113 | 434.2176 | 60.5941  | 23.45249 | 0.194488 | 0.689899 |
| 134.5863 | 1.852002 | 1.082142 | 434.2566 | 60.59568 | 23.45312 | 0.194493 | 0.690009 |
| 134.6476 | 1.852051 | 1.08217  | 434.2956 | 60.59726 | 23.45375 | 0.194498 | 0.690119 |
| 134.7089 | 1.8521   | 1.082198 | 434.3345 | 60.59883 | 23.45437 | 0.194503 | 0.690229 |
| 134.7702 | 1.85215  | 1.082226 | 434.3734 | 60.60041 | 23.455   | 0.194508 | 0.690338 |
| 134.8315 | 1.852199 | 1.082254 | 434.4122 | 60.60198 | 23.45563 | 0.194514 | 0.690448 |
| 134.8927 | 1.852248 | 1.082282 | 434.451  | 60.60355 | 23.45625 | 0.194519 | 0.690557 |
| 134.954  | 1.852297 | 1.08231  | 434.4897 | 60.60512 | 23.45688 | 0.194524 | 0.690667 |
| 135.0153 | 1.852346 | 1.082338 | 434.5284 | 60.60668 | 23.4575  | 0.194529 | 0.690776 |
| 135.0766 | 1.852395 | 1.082366 | 434.567  | 60.60824 | 23.45812 | 0.194534 | 0.690885 |
| 135.1379 | 1.852444 | 1.082394 | 434.6056 | 60.60981 | 23.45874 | 0.194539 | 0.690994 |
| 135.1992 | 1.852493 | 1.082422 | 434.6442 | 60.61137 | 23.45937 | 0.194544 | 0.691103 |
| 135.2605 | 1.852542 | 1.082449 | 434.6827 | 60.61292 | 23.45999 | 0.194549 | 0.691212 |

|          |          |          |          |          |          |          |          |
|----------|----------|----------|----------|----------|----------|----------|----------|
| 135.3218 | 1.852591 | 1.082477 | 434.7211 | 60.61448 | 23.46061 | 0.194554 | 0.691321 |
| 135.383  | 1.85264  | 1.082505 | 434.7595 | 60.61603 | 23.46122 | 0.194559 | 0.691429 |
| 135.4443 | 1.852688 | 1.082533 | 434.7978 | 60.61759 | 23.46184 | 0.194564 | 0.691538 |
| 135.5056 | 1.852737 | 1.08256  | 434.8361 | 60.61914 | 23.46246 | 0.194569 | 0.691646 |
| 135.5669 | 1.852785 | 1.082588 | 434.8744 | 60.62068 | 23.46308 | 0.194574 | 0.691755 |
| 135.6282 | 1.852834 | 1.082615 | 434.9126 | 60.62223 | 23.46369 | 0.194579 | 0.691863 |
| 135.6895 | 1.852882 | 1.082643 | 434.9507 | 60.62377 | 23.46431 | 0.194584 | 0.691971 |
| 135.7508 | 1.852931 | 1.082671 | 434.9888 | 60.62532 | 23.46492 | 0.194589 | 0.692079 |
| 135.8121 | 1.852979 | 1.082698 | 435.0269 | 60.62686 | 23.46554 | 0.194593 | 0.692187 |
| 135.8733 | 1.853027 | 1.082726 | 435.0649 | 60.6284  | 23.46615 | 0.194598 | 0.692295 |
| 135.9346 | 1.853075 | 1.082753 | 435.1029 | 60.62993 | 23.46676 | 0.194603 | 0.692403 |
| 135.9959 | 1.853123 | 1.08278  | 435.1408 | 60.63147 | 23.46737 | 0.194608 | 0.69251  |
| 136.0572 | 1.853171 | 1.082808 | 435.1787 | 60.633   | 23.46798 | 0.194613 | 0.692618 |
| 136.1185 | 1.853219 | 1.082835 | 435.2165 | 60.63453 | 23.46859 | 0.194618 | 0.692725 |
| 136.1798 | 1.853267 | 1.082862 | 435.2543 | 60.63606 | 23.4692  | 0.194623 | 0.692833 |
| 136.2411 | 1.853315 | 1.08289  | 435.292  | 60.63759 | 23.46981 | 0.194628 | 0.69294  |
| 136.3023 | 1.853363 | 1.082917 | 435.3297 | 60.63911 | 23.47042 | 0.194633 | 0.693047 |
| 136.3636 | 1.853411 | 1.082944 | 435.3673 | 60.64063 | 23.47102 | 0.194638 | 0.693154 |
| 136.4249 | 1.853458 | 1.082971 | 435.4049 | 60.64215 | 23.47163 | 0.194643 | 0.693261 |
| 136.4862 | 1.853506 | 1.082998 | 435.4424 | 60.64367 | 23.47223 | 0.194648 | 0.693368 |
| 136.5475 | 1.853554 | 1.083025 | 435.4799 | 60.64519 | 23.47284 | 0.194652 | 0.693475 |
| 136.6088 | 1.853601 | 1.083052 | 435.5174 | 60.64671 | 23.47344 | 0.194657 | 0.693581 |
| 136.6701 | 1.853648 | 1.083079 | 435.5547 | 60.64822 | 23.47404 | 0.194662 | 0.693688 |
| 136.7314 | 1.853696 | 1.083106 | 435.5921 | 60.64973 | 23.47465 | 0.194667 | 0.693794 |
| 136.7926 | 1.853743 | 1.083133 | 435.6294 | 60.65124 | 23.47525 | 0.194672 | 0.693901 |
| 136.8539 | 1.85379  | 1.08316  | 435.6667 | 60.65275 | 23.47585 | 0.194677 | 0.694007 |
| 136.9152 | 1.853838 | 1.083187 | 435.7039 | 60.65425 | 23.47645 | 0.194682 | 0.694113 |
| 136.9765 | 1.853885 | 1.083214 | 435.741  | 60.65576 | 23.47705 | 0.194686 | 0.694219 |
| 137.0378 | 1.853932 | 1.083241 | 435.7781 | 60.65726 | 23.47764 | 0.194691 | 0.694325 |
| 137.0991 | 1.853979 | 1.083268 | 435.8152 | 60.65876 | 23.47824 | 0.194696 | 0.694431 |
| 137.1604 | 1.854026 | 1.083294 | 435.8522 | 60.66026 | 23.47884 | 0.194701 | 0.694537 |
| 137.2217 | 1.854073 | 1.083321 | 435.8892 | 60.66176 | 23.47943 | 0.194706 | 0.694642 |
| 137.2829 | 1.85412  | 1.083348 | 435.9261 | 60.66325 | 23.48003 | 0.19471  | 0.694748 |
| 137.3442 | 1.854166 | 1.083374 | 435.963  | 60.66474 | 23.48062 | 0.194715 | 0.694854 |
| 137.4055 | 1.854213 | 1.083401 | 435.9999 | 60.66623 | 23.48122 | 0.19472  | 0.694959 |
| 137.4668 | 1.85426  | 1.083428 | 436.0366 | 60.66772 | 23.48181 | 0.194725 | 0.695064 |
| 137.5281 | 1.854306 | 1.083454 | 436.0734 | 60.66921 | 23.4824  | 0.19473  | 0.695169 |
| 137.5894 | 1.854353 | 1.083481 | 436.1101 | 60.6707  | 23.483   | 0.194734 | 0.695274 |
| 137.6507 | 1.854399 | 1.083507 | 436.1467 | 60.67218 | 23.48359 | 0.194739 | 0.695379 |
| 137.712  | 1.854446 | 1.083534 | 436.1833 | 60.67366 | 23.48418 | 0.194744 | 0.695484 |
| 137.7732 | 1.854492 | 1.08356  | 436.2199 | 60.67514 | 23.48477 | 0.194749 | 0.695589 |
| 137.8345 | 1.854539 | 1.083586 | 436.2564 | 60.67662 | 23.48535 | 0.194753 | 0.695694 |
| 137.8958 | 1.854585 | 1.083613 | 436.2929 | 60.67809 | 23.48594 | 0.194758 | 0.695798 |
| 137.9571 | 1.854631 | 1.083639 | 436.3293 | 60.67957 | 23.48653 | 0.194763 | 0.695903 |
| 138.0184 | 1.854677 | 1.083665 | 436.3657 | 60.68104 | 23.48712 | 0.194768 | 0.696007 |
| 138.0797 | 1.854723 | 1.083692 | 436.402  | 60.68251 | 23.4877  | 0.194772 | 0.696111 |
| 138.141  | 1.854769 | 1.083718 | 436.4383 | 60.68398 | 23.48829 | 0.194777 | 0.696216 |



|          |          |          |          |          |          |          |          |
|----------|----------|----------|----------|----------|----------|----------|----------|
| 138.2022 | 1.854815 | 1.083744 | 436.4745 | 60.68545 | 23.48887 | 0.194782 | 0.69632  |
| 138.2635 | 1.854861 | 1.08377  | 436.5107 | 60.68691 | 23.48945 | 0.194786 | 0.696424 |
| 138.3248 | 1.854907 | 1.083796 | 436.5469 | 60.68837 | 23.49004 | 0.194791 | 0.696528 |
| 138.3861 | 1.854953 | 1.083822 | 436.583  | 60.68983 | 23.49062 | 0.194796 | 0.696631 |
| 138.4474 | 1.854999 | 1.083848 | 436.619  | 60.69129 | 23.4912  | 0.194801 | 0.696735 |
| 138.5087 | 1.855044 | 1.083874 | 436.655  | 60.69275 | 23.49178 | 0.194805 | 0.696839 |
| 138.57   | 1.85509  | 1.0839   | 436.691  | 60.69421 | 23.49236 | 0.19481  | 0.696942 |
| 138.6313 | 1.855136 | 1.083926 | 436.7269 | 60.69566 | 23.49294 | 0.194815 | 0.697046 |
| 138.6925 | 1.855181 | 1.083952 | 436.7628 | 60.69712 | 23.49352 | 0.194819 | 0.697149 |
| 138.7538 | 1.855227 | 1.083978 | 436.7987 | 60.69857 | 23.4941  | 0.194824 | 0.697252 |
| 138.8151 | 1.855272 | 1.084004 | 436.8345 | 60.70002 | 23.49467 | 0.194829 | 0.697355 |
| 138.8764 | 1.855317 | 1.08403  | 436.8703 | 60.70146 | 23.49525 | 0.194833 | 0.697458 |
| 138.9377 | 1.855363 | 1.084056 | 436.906  | 60.70291 | 23.49583 | 0.194838 | 0.697561 |
| 138.999  | 1.855408 | 1.084081 | 436.9417 | 60.70435 | 23.4964  | 0.194842 | 0.697664 |
| 139.0603 | 1.855453 | 1.084107 | 436.9773 | 60.7058  | 23.49697 | 0.194847 | 0.697767 |
| 139.1216 | 1.855498 | 1.084133 | 437.0129 | 60.70724 | 23.49755 | 0.194852 | 0.69787  |
| 139.1828 | 1.855543 | 1.084159 | 437.0484 | 60.70867 | 23.49812 | 0.194856 | 0.697972 |
| 139.2441 | 1.855588 | 1.084184 | 437.0839 | 60.71011 | 23.49869 | 0.194861 | 0.698075 |
| 139.3054 | 1.855633 | 1.08421  | 437.1194 | 60.71155 | 23.49927 | 0.194866 | 0.698177 |
| 139.3667 | 1.855678 | 1.084235 | 437.1548 | 60.71298 | 23.49984 | 0.19487  | 0.698279 |
| 139.428  | 1.855723 | 1.084261 | 437.1902 | 60.71441 | 23.50041 | 0.194875 | 0.698381 |
| 139.4893 | 1.855768 | 1.084287 | 437.2255 | 60.71584 | 23.50098 | 0.194879 | 0.698484 |
| 139.5506 | 1.855813 | 1.084312 | 437.2608 | 60.71727 | 23.50154 | 0.194884 | 0.698586 |
| 139.6118 | 1.855857 | 1.084337 | 437.296  | 60.71869 | 23.50211 | 0.194889 | 0.698687 |
| 139.6731 | 1.855902 | 1.084363 | 437.3312 | 60.72012 | 23.50268 | 0.194893 | 0.698789 |
| 139.7344 | 1.855947 | 1.084388 | 437.3663 | 60.72154 | 23.50325 | 0.194898 | 0.698891 |
| 139.7957 | 1.855991 | 1.084414 | 437.4014 | 60.72296 | 23.50381 | 0.194902 | 0.698993 |
| 139.857  | 1.856036 | 1.084439 | 437.4365 | 60.72438 | 23.50438 | 0.194907 | 0.699094 |
| 139.9183 | 1.85608  | 1.084464 | 437.4715 | 60.7258  | 23.50494 | 0.194911 | 0.699195 |
| 139.9796 | 1.856125 | 1.08449  | 437.5065 | 60.72721 | 23.50551 | 0.194916 | 0.699297 |
| 140.0409 | 1.856169 | 1.084515 | 437.5414 | 60.72863 | 23.50607 | 0.19492  | 0.699398 |
| 140.1021 | 1.856213 | 1.08454  | 437.5763 | 60.73004 | 23.50663 | 0.194925 | 0.699499 |
| 140.1634 | 1.856257 | 1.084565 | 437.6111 | 60.73145 | 23.50719 | 0.19493  | 0.6996   |
| 140.2247 | 1.856301 | 1.08459  | 437.6459 | 60.73286 | 23.50775 | 0.194934 | 0.699701 |
| 140.286  | 1.856346 | 1.084615 | 437.6807 | 60.73426 | 23.50831 | 0.194939 | 0.699802 |
| 140.3473 | 1.85639  | 1.084641 | 437.7154 | 60.73567 | 23.50887 | 0.194943 | 0.699903 |
| 140.4086 | 1.856434 | 1.084666 | 437.7501 | 60.73707 | 23.50943 | 0.194948 | 0.700003 |
| 140.4699 | 1.856478 | 1.084691 | 437.7847 | 60.73847 | 23.50999 | 0.194952 | 0.700104 |
| 140.5312 | 1.856521 | 1.084716 | 437.8193 | 60.73987 | 23.51055 | 0.194957 | 0.700204 |
| 140.5924 | 1.856565 | 1.084741 | 437.8538 | 60.74127 | 23.51111 | 0.194961 | 0.700305 |
| 140.6537 | 1.856609 | 1.084765 | 437.8883 | 60.74267 | 23.51166 | 0.194966 | 0.700405 |
| 140.715  | 1.856653 | 1.08479  | 437.9228 | 60.74406 | 23.51222 | 0.19497  | 0.700505 |
| 140.7763 | 1.856696 | 1.084815 | 437.9572 | 60.74546 | 23.51277 | 0.194975 | 0.700605 |
| 140.8376 | 1.85674  | 1.08484  | 437.9915 | 60.74685 | 23.51333 | 0.194979 | 0.700705 |
| 140.8989 | 1.856784 | 1.084865 | 438.0259 | 60.74824 | 23.51388 | 0.194983 | 0.700805 |
| 140.9602 | 1.856827 | 1.08489  | 438.0601 | 60.74962 | 23.51443 | 0.194988 | 0.700905 |
| 141.0215 | 1.85687  | 1.084914 | 438.0944 | 60.75101 | 23.51498 | 0.194992 | 0.701005 |

|          |          |          |          |          |          |          |          |
|----------|----------|----------|----------|----------|----------|----------|----------|
| 141.0827 | 1.856914 | 1.084939 | 438.1286 | 60.75239 | 23.51553 | 0.194997 | 0.701104 |
| 141.144  | 1.856957 | 1.084964 | 438.1627 | 60.75378 | 23.51609 | 0.195001 | 0.701204 |
| 141.2053 | 1.857    | 1.084988 | 438.1968 | 60.75516 | 23.51664 | 0.195006 | 0.701303 |
| 141.2666 | 1.857044 | 1.085013 | 438.2309 | 60.75653 | 23.51718 | 0.19501  | 0.701403 |
| 141.3279 | 1.857087 | 1.085038 | 438.2649 | 60.75791 | 23.51773 | 0.195015 | 0.701502 |
| 141.3892 | 1.85713  | 1.085062 | 438.2989 | 60.75929 | 23.51828 | 0.195019 | 0.701601 |
| 141.4505 | 1.857173 | 1.085087 | 438.3328 | 60.76066 | 23.51883 | 0.195023 | 0.7017   |
| 141.5117 | 1.857216 | 1.085111 | 438.3667 | 60.76203 | 23.51937 | 0.195028 | 0.701799 |
| 141.573  | 1.857259 | 1.085136 | 438.4006 | 60.7634  | 23.51992 | 0.195032 | 0.701898 |
| 141.6343 | 1.857302 | 1.08516  | 438.4344 | 60.76477 | 23.52047 | 0.195037 | 0.701997 |
| 141.6956 | 1.857345 | 1.085184 | 438.4682 | 60.76614 | 23.52101 | 0.195041 | 0.702096 |
| 141.7569 | 1.857388 | 1.085209 | 438.5019 | 60.7675  | 23.52155 | 0.195045 | 0.702194 |
| 141.8182 | 1.85743  | 1.085233 | 438.5356 | 60.76887 | 23.5221  | 0.19505  | 0.702293 |
| 141.8795 | 1.857473 | 1.085257 | 438.5693 | 60.77023 | 23.52264 | 0.195054 | 0.702391 |
| 141.9408 | 1.857516 | 1.085282 | 438.6029 | 60.77159 | 23.52318 | 0.195058 | 0.702489 |
| 142.002  | 1.857558 | 1.085306 | 438.6364 | 60.77295 | 23.52372 | 0.195063 | 0.702588 |
| 142.0633 | 1.857601 | 1.08533  | 438.6699 | 60.77431 | 23.52426 | 0.195067 | 0.702686 |
| 142.1246 | 1.857643 | 1.085354 | 438.7034 | 60.77566 | 23.5248  | 0.195072 | 0.702784 |
| 142.1859 | 1.857686 | 1.085379 | 438.7368 | 60.77701 | 23.52534 | 0.195076 | 0.702882 |
| 142.2472 | 1.857728 | 1.085403 | 438.7702 | 60.77837 | 23.52588 | 0.19508  | 0.70298  |
| 142.3085 | 1.85777  | 1.085427 | 438.8036 | 60.77972 | 23.52642 | 0.195085 | 0.703078 |
| 142.3698 | 1.857813 | 1.085451 | 438.8369 | 60.78106 | 23.52696 | 0.195089 | 0.703175 |
| 142.4311 | 1.857855 | 1.085475 | 438.8702 | 60.78241 | 23.52749 | 0.195093 | 0.703273 |
| 142.4923 | 1.857897 | 1.085499 | 438.9034 | 60.78376 | 23.52803 | 0.195098 | 0.70337  |
| 142.5536 | 1.857939 | 1.085523 | 438.9366 | 60.7851  | 23.52856 | 0.195102 | 0.703468 |
| 142.6149 | 1.857981 | 1.085547 | 438.9697 | 60.78644 | 23.5291  | 0.195106 | 0.703565 |
| 142.6762 | 1.858023 | 1.085571 | 439.0028 | 60.78778 | 23.52963 | 0.195111 | 0.703662 |
| 142.7375 | 1.858065 | 1.085595 | 439.0359 | 60.78912 | 23.53016 | 0.195115 | 0.703759 |
| 142.7988 | 1.858107 | 1.085618 | 439.0689 | 60.79046 | 23.5307  | 0.195119 | 0.703856 |
| 142.8601 | 1.858149 | 1.085642 | 439.1019 | 60.79179 | 23.53123 | 0.195123 | 0.703953 |
| 142.9213 | 1.858191 | 1.085666 | 439.1348 | 60.79312 | 23.53176 | 0.195128 | 0.70405  |
| 142.9826 | 1.858232 | 1.08569  | 439.1677 | 60.79446 | 23.53229 | 0.195132 | 0.704147 |
| 143.0439 | 1.858274 | 1.085714 | 439.2006 | 60.79579 | 23.53282 | 0.195136 | 0.704244 |
| 143.1052 | 1.858316 | 1.085737 | 439.2334 | 60.79711 | 23.53335 | 0.195141 | 0.70434  |
| 143.1665 | 1.858357 | 1.085761 | 439.2662 | 60.79844 | 23.53388 | 0.195145 | 0.704437 |
| 143.2278 | 1.858399 | 1.085785 | 439.2989 | 60.79977 | 23.5344  | 0.195149 | 0.704533 |
| 143.2891 | 1.85844  | 1.085808 | 439.3316 | 60.80109 | 23.53493 | 0.195153 | 0.70463  |
| 143.3504 | 1.858482 | 1.085832 | 439.3643 | 60.80241 | 23.53546 | 0.195158 | 0.704726 |
| 143.4116 | 1.858523 | 1.085855 | 439.3969 | 60.80373 | 23.53598 | 0.195162 | 0.704822 |
| 143.4729 | 1.858564 | 1.085879 | 439.4295 | 60.80505 | 23.53651 | 0.195166 | 0.704918 |
| 143.5342 | 1.858606 | 1.085903 | 439.462  | 60.80637 | 23.53703 | 0.19517  | 0.705014 |
| 143.5955 | 1.858647 | 1.085926 | 439.4945 | 60.80768 | 23.53756 | 0.195174 | 0.70511  |
| 143.6568 | 1.858688 | 1.085949 | 439.5269 | 60.80899 | 23.53808 | 0.195179 | 0.705206 |
| 143.7181 | 1.858729 | 1.085973 | 439.5593 | 60.81031 | 23.5386  | 0.195183 | 0.705301 |
| 143.7794 | 1.85877  | 1.085996 | 439.5917 | 60.81162 | 23.53913 | 0.195187 | 0.705397 |
| 143.8407 | 1.858811 | 1.08602  | 439.624  | 60.81292 | 23.53965 | 0.195191 | 0.705492 |
| 143.9019 | 1.858852 | 1.086043 | 439.6563 | 60.81423 | 23.54017 | 0.195196 | 0.705588 |

|          |          |          |          |          |          |          |          |
|----------|----------|----------|----------|----------|----------|----------|----------|
| 143.9632 | 1.858893 | 1.086066 | 439.6886 | 60.81554 | 23.54069 | 0.1952   | 0.705683 |
| 144.0245 | 1.858934 | 1.08609  | 439.7208 | 60.81684 | 23.54121 | 0.195204 | 0.705778 |
| 144.0858 | 1.858975 | 1.086113 | 439.753  | 60.81814 | 23.54172 | 0.195208 | 0.705874 |
| 144.1471 | 1.859016 | 1.086136 | 439.7851 | 60.81944 | 23.54224 | 0.195212 | 0.705969 |
| 144.2084 | 1.859056 | 1.086159 | 439.8172 | 60.82074 | 23.54276 | 0.195216 | 0.706064 |
| 144.2697 | 1.859097 | 1.086182 | 439.8492 | 60.82204 | 23.54328 | 0.195221 | 0.706159 |
| 144.3309 | 1.859138 | 1.086205 | 439.8812 | 60.82334 | 23.54379 | 0.195225 | 0.706253 |
| 144.3922 | 1.859178 | 1.086229 | 439.9132 | 60.82463 | 23.54431 | 0.195229 | 0.706348 |
| 144.4535 | 1.859219 | 1.086252 | 439.9451 | 60.82592 | 23.54482 | 0.195233 | 0.706443 |
| 144.5148 | 1.859259 | 1.086275 | 439.977  | 60.82721 | 23.54534 | 0.195237 | 0.706537 |
| 144.5761 | 1.8593   | 1.086298 | 440.0089 | 60.8285  | 23.54585 | 0.195241 | 0.706632 |
| 144.6374 | 1.85934  | 1.086321 | 440.0407 | 60.82979 | 23.54636 | 0.195245 | 0.706726 |
| 144.6987 | 1.85938  | 1.086344 | 440.0724 | 60.83108 | 23.54688 | 0.19525  | 0.70682  |
| 144.76   | 1.859421 | 1.086367 | 440.1042 | 60.83236 | 23.54739 | 0.195254 | 0.706914 |
| 144.8212 | 1.859461 | 1.086389 | 440.1359 | 60.83364 | 23.5479  | 0.195258 | 0.707009 |
| 144.8825 | 1.859501 | 1.086412 | 440.1675 | 60.83492 | 23.54841 | 0.195262 | 0.707103 |
| 144.9438 | 1.859541 | 1.086435 | 440.1991 | 60.8362  | 23.54892 | 0.195266 | 0.707197 |
| 145.0051 | 1.859581 | 1.086458 | 440.2307 | 60.83748 | 23.54943 | 0.19527  | 0.70729  |
| 145.0664 | 1.859621 | 1.086481 | 440.2622 | 60.83876 | 23.54994 | 0.195274 | 0.707384 |
| 145.1277 | 1.859661 | 1.086504 | 440.2937 | 60.84003 | 23.55044 | 0.195278 | 0.707478 |
| 145.189  | 1.859701 | 1.086526 | 440.3252 | 60.84131 | 23.55095 | 0.195282 | 0.707571 |
| 145.2503 | 1.859741 | 1.086549 | 440.3566 | 60.84258 | 23.55146 | 0.195287 | 0.707665 |
| 145.3115 | 1.859781 | 1.086572 | 440.388  | 60.84385 | 23.55196 | 0.195291 | 0.707758 |
| 145.3728 | 1.859821 | 1.086594 | 440.4193 | 60.84512 | 23.55247 | 0.195295 | 0.707851 |
| 145.4341 | 1.85986  | 1.086617 | 440.4506 | 60.84638 | 23.55297 | 0.195299 | 0.707945 |
| 145.4954 | 1.8599   | 1.086639 | 440.4819 | 60.84765 | 23.55348 | 0.195303 | 0.708038 |
| 145.5567 | 1.85994  | 1.086662 | 440.5131 | 60.84891 | 23.55398 | 0.195307 | 0.708131 |
| 145.618  | 1.859979 | 1.086685 | 440.5443 | 60.85017 | 23.55448 | 0.195311 | 0.708224 |
| 145.6793 | 1.860019 | 1.086707 | 440.5754 | 60.85143 | 23.55499 | 0.195315 | 0.708317 |
| 145.7406 | 1.860058 | 1.08673  | 440.6065 | 60.85269 | 23.55549 | 0.195319 | 0.708409 |
| 145.8018 | 1.860098 | 1.086752 | 440.6376 | 60.85395 | 23.55599 | 0.195323 | 0.708502 |
| 145.8631 | 1.860137 | 1.086774 | 440.6686 | 60.85521 | 23.55649 | 0.195327 | 0.708595 |
| 145.9244 | 1.860176 | 1.086797 | 440.6996 | 60.85646 | 23.55699 | 0.195331 | 0.708687 |
| 145.9857 | 1.860216 | 1.086819 | 440.7306 | 60.85771 | 23.55749 | 0.195335 | 0.70878  |
| 146.047  | 1.860255 | 1.086841 | 440.7615 | 60.85897 | 23.55799 | 0.195339 | 0.708872 |
| 146.1083 | 1.860294 | 1.086864 | 440.7923 | 60.86022 | 23.55848 | 0.195343 | 0.708964 |
| 146.1696 | 1.860333 | 1.086886 | 440.8232 | 60.86146 | 23.55898 | 0.195347 | 0.709056 |
| 146.2308 | 1.860372 | 1.086908 | 440.854  | 60.86271 | 23.55948 | 0.195351 | 0.709148 |
| 146.2921 | 1.860411 | 1.086931 | 440.8847 | 60.86396 | 23.55997 | 0.195355 | 0.70924  |
| 146.3534 | 1.86045  | 1.086953 | 440.9154 | 60.8652  | 23.56047 | 0.195359 | 0.709332 |
| 146.4147 | 1.860489 | 1.086975 | 440.9461 | 60.86644 | 23.56096 | 0.195363 | 0.709424 |
| 146.476  | 1.860528 | 1.086997 | 440.9768 | 60.86768 | 23.56146 | 0.195367 | 0.709516 |
| 146.5373 | 1.860567 | 1.087019 | 441.0074 | 60.86892 | 23.56195 | 0.195371 | 0.709608 |
| 146.5986 | 1.860606 | 1.087041 | 441.0379 | 60.87016 | 23.56245 | 0.195375 | 0.709699 |
| 146.6599 | 1.860644 | 1.087063 | 441.0685 | 60.87139 | 23.56294 | 0.195379 | 0.709791 |
| 146.7211 | 1.860683 | 1.087085 | 441.099  | 60.87263 | 23.56343 | 0.195383 | 0.709882 |
| 146.7824 | 1.860722 | 1.087107 | 441.1294 | 60.87386 | 23.56392 | 0.195387 | 0.709973 |

|          |          |          |          |          |          |          |          |
|----------|----------|----------|----------|----------|----------|----------|----------|
| 146.8437 | 1.86076  | 1.087129 | 441.1598 | 60.87509 | 23.56441 | 0.195391 | 0.710064 |
| 146.905  | 1.860799 | 1.087151 | 441.1902 | 60.87632 | 23.5649  | 0.195395 | 0.710156 |
| 146.9663 | 1.860837 | 1.087173 | 441.2205 | 60.87755 | 23.56539 | 0.195399 | 0.710247 |
| 147.0276 | 1.860876 | 1.087195 | 441.2508 | 60.87878 | 23.56588 | 0.195403 | 0.710338 |
| 147.0889 | 1.860914 | 1.087217 | 441.2811 | 60.88    | 23.56637 | 0.195407 | 0.710428 |
| 147.1502 | 1.860953 | 1.087239 | 441.3113 | 60.88122 | 23.56685 | 0.195411 | 0.710519 |
| 147.2114 | 1.860991 | 1.087261 | 441.3415 | 60.88245 | 23.56734 | 0.195415 | 0.71061  |
| 147.2727 | 1.861029 | 1.087282 | 441.3717 | 60.88367 | 23.56783 | 0.195419 | 0.710701 |
| 147.334  | 1.861067 | 1.087304 | 441.4018 | 60.88489 | 23.56831 | 0.195423 | 0.710791 |
| 147.3953 | 1.861106 | 1.087326 | 441.4319 | 60.8861  | 23.5688  | 0.195426 | 0.710882 |
| 147.4566 | 1.861144 | 1.087348 | 441.4619 | 60.88732 | 23.56928 | 0.19543  | 0.710972 |
| 147.5179 | 1.861182 | 1.087369 | 441.4919 | 60.88853 | 23.56977 | 0.195434 | 0.711062 |
| 147.5792 | 1.86122  | 1.087391 | 441.5219 | 60.88975 | 23.57025 | 0.195438 | 0.711152 |
| 147.6404 | 1.861258 | 1.087413 | 441.5518 | 60.89096 | 23.57073 | 0.195442 | 0.711242 |
| 147.7017 | 1.861296 | 1.087434 | 441.5817 | 60.89217 | 23.57121 | 0.195446 | 0.711332 |
| 147.763  | 1.861334 | 1.087456 | 441.6115 | 60.89338 | 23.57169 | 0.19545  | 0.711422 |
| 147.8243 | 1.861371 | 1.087477 | 441.6413 | 60.89458 | 23.57218 | 0.195454 | 0.711512 |
| 147.8856 | 1.861409 | 1.087499 | 441.6711 | 60.89579 | 23.57266 | 0.195458 | 0.711602 |
| 147.9469 | 1.861447 | 1.08752  | 441.7009 | 60.89699 | 23.57314 | 0.195461 | 0.711692 |
| 148.0082 | 1.861485 | 1.087542 | 441.7306 | 60.8982  | 23.57361 | 0.195465 | 0.711781 |
| 148.0695 | 1.861522 | 1.087563 | 441.7602 | 60.8994  | 23.57409 | 0.195469 | 0.711871 |
| 148.1307 | 1.86156  | 1.087585 | 441.7899 | 60.9006  | 23.57457 | 0.195473 | 0.71196  |
| 148.192  | 1.861598 | 1.087606 | 441.8195 | 60.90179 | 23.57505 | 0.195477 | 0.71205  |
| 148.2533 | 1.861635 | 1.087627 | 441.849  | 60.90299 | 23.57552 | 0.195481 | 0.712139 |
| 148.3146 | 1.861672 | 1.087649 | 441.8785 | 60.90418 | 23.576   | 0.195485 | 0.712228 |
| 148.3759 | 1.86171  | 1.08767  | 441.908  | 60.90538 | 23.57648 | 0.195488 | 0.712317 |
| 148.4372 | 1.861747 | 1.087691 | 441.9375 | 60.90657 | 23.57695 | 0.195492 | 0.712406 |
| 148.4985 | 1.861785 | 1.087713 | 441.9669 | 60.90776 | 23.57743 | 0.195496 | 0.712495 |
| 148.5598 | 1.861822 | 1.087734 | 441.9962 | 60.90895 | 23.5779  | 0.1955   | 0.712584 |
| 148.621  | 1.861859 | 1.087755 | 442.0256 | 60.91014 | 23.57837 | 0.195504 | 0.712673 |
| 148.6823 | 1.861896 | 1.087776 | 442.0549 | 60.91132 | 23.57884 | 0.195507 | 0.712761 |
| 148.7436 | 1.861933 | 1.087797 | 442.0842 | 60.91251 | 23.57932 | 0.195511 | 0.71285  |
| 148.8049 | 1.861971 | 1.087818 | 442.1134 | 60.91369 | 23.57979 | 0.195515 | 0.712938 |
| 148.8662 | 1.862008 | 1.08784  | 442.1426 | 60.91487 | 23.58026 | 0.195519 | 0.713027 |
| 148.9275 | 1.862045 | 1.087861 | 442.1717 | 60.91605 | 23.58073 | 0.195523 | 0.713115 |
| 148.9888 | 1.862082 | 1.087882 | 442.2008 | 60.91723 | 23.5812  | 0.195526 | 0.713203 |
| 149.0501 | 1.862118 | 1.087903 | 442.2299 | 60.91841 | 23.58167 | 0.19553  | 0.713292 |
| 149.1113 | 1.862155 | 1.087924 | 442.259  | 60.91959 | 23.58214 | 0.195534 | 0.71338  |
| 149.1726 | 1.862192 | 1.087945 | 442.288  | 60.92076 | 23.5826  | 0.195538 | 0.713468 |
| 149.2339 | 1.862229 | 1.087966 | 442.317  | 60.92193 | 23.58307 | 0.195542 | 0.713556 |
| 149.2952 | 1.862266 | 1.087986 | 442.3459 | 60.9231  | 23.58354 | 0.195545 | 0.713643 |
| 149.3565 | 1.862302 | 1.088007 | 442.3748 | 60.92427 | 23.584   | 0.195549 | 0.713731 |
| 149.4178 | 1.862339 | 1.088028 | 442.4037 | 60.92544 | 23.58447 | 0.195553 | 0.713819 |
| 149.4791 | 1.862376 | 1.088049 | 442.4325 | 60.92661 | 23.58493 | 0.195557 | 0.713906 |
| 149.5403 | 1.862412 | 1.08807  | 442.4613 | 60.92778 | 23.5854  | 0.19556  | 0.713994 |
| 149.6016 | 1.862449 | 1.088091 | 442.4901 | 60.92894 | 23.58586 | 0.195564 | 0.714081 |
| 149.6629 | 1.862485 | 1.088111 | 442.5188 | 60.9301  | 23.58633 | 0.195568 | 0.714169 |

|          |          |          |          |          |          |          |          |
|----------|----------|----------|----------|----------|----------|----------|----------|
| 149.7242 | 1.862522 | 1.088132 | 442.5475 | 60.93126 | 23.58679 | 0.195572 | 0.714256 |
| 149.7855 | 1.862558 | 1.088153 | 442.5761 | 60.93242 | 23.58725 | 0.195575 | 0.714343 |
| 149.8468 | 1.862594 | 1.088173 | 442.6047 | 60.93358 | 23.58771 | 0.195579 | 0.71443  |
| 149.9081 | 1.86263  | 1.088194 | 442.6333 | 60.93474 | 23.58817 | 0.195583 | 0.714517 |
| 149.9694 | 1.862667 | 1.088215 | 442.6619 | 60.9359  | 23.58863 | 0.195586 | 0.714604 |
| 150.0306 | 1.862703 | 1.088235 | 442.6904 | 60.93705 | 23.58909 | 0.19559  | 0.714691 |
| 150.0919 | 1.862739 | 1.088256 | 442.7189 | 60.9382  | 23.58955 | 0.195594 | 0.714778 |
| 150.1532 | 1.862775 | 1.088277 | 442.7473 | 60.93935 | 23.59001 | 0.195598 | 0.714864 |
| 150.2145 | 1.862811 | 1.088297 | 442.7757 | 60.9405  | 23.59047 | 0.195601 | 0.714951 |
| 150.2758 | 1.862847 | 1.088318 | 442.8041 | 60.94165 | 23.59093 | 0.195605 | 0.715038 |
| 150.3371 | 1.862883 | 1.088338 | 442.8324 | 60.9428  | 23.59138 | 0.195609 | 0.715124 |
| 150.3984 | 1.862919 | 1.088358 | 442.8607 | 60.94394 | 23.59184 | 0.195612 | 0.71521  |
| 150.4597 | 1.862955 | 1.088379 | 442.889  | 60.94509 | 23.5923  | 0.195616 | 0.715297 |
| 150.5209 | 1.862991 | 1.088399 | 442.9172 | 60.94623 | 23.59275 | 0.19562  | 0.715383 |
| 150.5822 | 1.863027 | 1.08842  | 442.9454 | 60.94737 | 23.59321 | 0.195623 | 0.715469 |
| 150.6435 | 1.863062 | 1.08844  | 442.9736 | 60.94851 | 23.59366 | 0.195627 | 0.715555 |
| 150.7048 | 1.863098 | 1.08846  | 443.0017 | 60.94965 | 23.59411 | 0.195631 | 0.715641 |
| 150.7661 | 1.863134 | 1.088481 | 443.0298 | 60.95079 | 23.59457 | 0.195634 | 0.715727 |
| 150.8274 | 1.863169 | 1.088501 | 443.0578 | 60.95192 | 23.59502 | 0.195638 | 0.715813 |
| 150.8887 | 1.863205 | 1.088521 | 443.0858 | 60.95306 | 23.59547 | 0.195642 | 0.715898 |
| 150.9499 | 1.86324  | 1.088541 | 443.1138 | 60.95419 | 23.59592 | 0.195645 | 0.715984 |
| 151.0112 | 1.863276 | 1.088562 | 443.1417 | 60.95532 | 23.59637 | 0.195649 | 0.716069 |
| 151.0725 | 1.863311 | 1.088582 | 443.1696 | 60.95645 | 23.59682 | 0.195652 | 0.716155 |
| 151.1338 | 1.863347 | 1.088602 | 443.1975 | 60.95758 | 23.59727 | 0.195656 | 0.71624  |
| 151.1951 | 1.863382 | 1.088622 | 443.2253 | 60.95871 | 23.59772 | 0.19566  | 0.716326 |
| 151.2564 | 1.863417 | 1.088642 | 443.2531 | 60.95983 | 23.59817 | 0.195663 | 0.716411 |
| 151.3177 | 1.863452 | 1.088662 | 443.2809 | 60.96096 | 23.59862 | 0.195667 | 0.716496 |
| 151.379  | 1.863488 | 1.088682 | 443.3086 | 60.96208 | 23.59907 | 0.195671 | 0.716581 |
| 151.4402 | 1.863523 | 1.088702 | 443.3363 | 60.9632  | 23.59951 | 0.195674 | 0.716666 |
| 151.5015 | 1.863558 | 1.088722 | 443.364  | 60.96432 | 23.59996 | 0.195678 | 0.716751 |
| 151.5628 | 1.863593 | 1.088742 | 443.3916 | 60.96544 | 23.6004  | 0.195681 | 0.716836 |
| 151.6241 | 1.863628 | 1.088762 | 443.4192 | 60.96655 | 23.60085 | 0.195685 | 0.71692  |
| 151.6854 | 1.863663 | 1.088782 | 443.4468 | 60.96767 | 23.60129 | 0.195688 | 0.717005 |
| 151.7467 | 1.863698 | 1.088802 | 443.4743 | 60.96878 | 23.60174 | 0.195692 | 0.71709  |
| 151.808  | 1.863733 | 1.088822 | 443.5018 | 60.9699  | 23.60218 | 0.195696 | 0.717174 |
| 151.8693 | 1.863768 | 1.088842 | 443.5293 | 60.97101 | 23.60262 | 0.195699 | 0.717259 |
| 151.9305 | 1.863802 | 1.088861 | 443.5567 | 60.97212 | 23.60307 | 0.195703 | 0.717343 |
| 151.9918 | 1.863837 | 1.088881 | 443.5841 | 60.97323 | 23.60351 | 0.195706 | 0.717427 |
| 152.0531 | 1.863872 | 1.088901 | 443.6114 | 60.97434 | 23.60395 | 0.19571  | 0.717511 |
| 152.1144 | 1.863907 | 1.088921 | 443.6387 | 60.97544 | 23.60439 | 0.195713 | 0.717595 |
| 152.1757 | 1.863941 | 1.08894  | 443.666  | 60.97655 | 23.60483 | 0.195717 | 0.717679 |
| 152.237  | 1.863976 | 1.08896  | 443.6933 | 60.97765 | 23.60527 | 0.195721 | 0.717763 |
| 152.2983 | 1.86401  | 1.08898  | 443.7205 | 60.97875 | 23.60571 | 0.195724 | 0.717847 |
| 152.3596 | 1.864045 | 1.088999 | 443.7477 | 60.97985 | 23.60615 | 0.195728 | 0.717931 |
| 152.4208 | 1.864079 | 1.089019 | 443.7748 | 60.98095 | 23.60658 | 0.195731 | 0.718015 |
| 152.4821 | 1.864114 | 1.089039 | 443.8019 | 60.98205 | 23.60702 | 0.195735 | 0.718098 |
| 152.5434 | 1.864148 | 1.089058 | 443.829  | 60.98315 | 23.60746 | 0.195738 | 0.718182 |

|          |          |          |          |          |          |          |          |
|----------|----------|----------|----------|----------|----------|----------|----------|
| 152.6047 | 1.864183 | 1.089078 | 443.8561 | 60.98424 | 23.6079  | 0.195742 | 0.718265 |
| 152.666  | 1.864217 | 1.089097 | 443.8831 | 60.98533 | 23.60833 | 0.195745 | 0.718349 |
| 152.7273 | 1.864251 | 1.089117 | 443.9101 | 60.98643 | 23.60877 | 0.195749 | 0.718432 |
| 152.7886 | 1.864285 | 1.089136 | 443.937  | 60.98752 | 23.6092  | 0.195752 | 0.718515 |
| 152.8498 | 1.864319 | 1.089156 | 443.9639 | 60.98861 | 23.60964 | 0.195756 | 0.718598 |
| 152.9111 | 1.864354 | 1.089175 | 443.9908 | 60.9897  | 23.61007 | 0.195759 | 0.718682 |
| 152.9724 | 1.864388 | 1.089195 | 444.0177 | 60.99078 | 23.6105  | 0.195763 | 0.718765 |
| 153.0337 | 1.864422 | 1.089214 | 444.0445 | 60.99187 | 23.61093 | 0.195766 | 0.718847 |
| 153.095  | 1.864456 | 1.089233 | 444.0713 | 60.99295 | 23.61137 | 0.19577  | 0.71893  |
| 153.1563 | 1.86449  | 1.089253 | 444.098  | 60.99403 | 23.6118  | 0.195773 | 0.719013 |
| 153.2176 | 1.864524 | 1.089272 | 444.1247 | 60.99512 | 23.61223 | 0.195777 | 0.719096 |
| 153.2789 | 1.864557 | 1.089291 | 444.1514 | 60.9962  | 23.61266 | 0.19578  | 0.719178 |
| 153.3401 | 1.864591 | 1.08931  | 444.1781 | 60.99728 | 23.61309 | 0.195784 | 0.719261 |
| 153.4014 | 1.864625 | 1.08933  | 444.2047 | 60.99835 | 23.61352 | 0.195787 | 0.719343 |
| 153.4627 | 1.864659 | 1.089349 | 444.2313 | 60.99943 | 23.61395 | 0.195791 | 0.719426 |
| 153.524  | 1.864692 | 1.089368 | 444.2578 | 61.0005  | 23.61437 | 0.195794 | 0.719508 |
| 153.5853 | 1.864726 | 1.089387 | 444.2843 | 61.00158 | 23.6148  | 0.195797 | 0.71959  |
| 153.6466 | 1.86476  | 1.089406 | 444.3108 | 61.00265 | 23.61523 | 0.195801 | 0.719672 |
| 153.7079 | 1.864793 | 1.089426 | 444.3372 | 61.00372 | 23.61566 | 0.195804 | 0.719754 |
| 153.7692 | 1.864827 | 1.089445 | 444.3637 | 61.00479 | 23.61608 | 0.195808 | 0.719836 |
| 153.8304 | 1.86486  | 1.089464 | 444.39   | 61.00586 | 23.61651 | 0.195811 | 0.719918 |
| 153.8917 | 1.864894 | 1.089483 | 444.4164 | 61.00692 | 23.61693 | 0.195815 | 0.72     |
| 153.953  | 1.864927 | 1.089502 | 444.4427 | 61.00799 | 23.61736 | 0.195818 | 0.720082 |
| 154.0143 | 1.864961 | 1.089521 | 444.469  | 61.00905 | 23.61778 | 0.195821 | 0.720163 |
| 154.0756 | 1.864994 | 1.08954  | 444.4953 | 61.01012 | 23.61821 | 0.195825 | 0.720245 |
| 154.1369 | 1.865027 | 1.089559 | 444.5215 | 61.01118 | 23.61863 | 0.195828 | 0.720327 |
| 154.1982 | 1.86506  | 1.089578 | 444.5477 | 61.01224 | 23.61905 | 0.195832 | 0.720408 |
| 154.2594 | 1.865094 | 1.089597 | 444.5738 | 61.0133  | 23.61947 | 0.195835 | 0.720489 |
| 154.3207 | 1.865127 | 1.089615 | 444.5999 | 61.01436 | 23.61989 | 0.195838 | 0.720571 |
| 154.382  | 1.86516  | 1.089634 | 444.626  | 61.01541 | 23.62031 | 0.195842 | 0.720652 |
| 154.4433 | 1.865193 | 1.089653 | 444.6521 | 61.01647 | 23.62073 | 0.195845 | 0.720733 |
| 154.5046 | 1.865226 | 1.089672 | 444.6781 | 61.01752 | 23.62115 | 0.195849 | 0.720814 |
| 154.5659 | 1.865259 | 1.089691 | 444.7041 | 61.01857 | 23.62157 | 0.195852 | 0.720895 |
| 154.6272 | 1.865292 | 1.089709 | 444.7301 | 61.01962 | 23.62199 | 0.195855 | 0.720976 |
| 154.6885 | 1.865325 | 1.089728 | 444.756  | 61.02067 | 23.62241 | 0.195859 | 0.721057 |
| 154.7497 | 1.865358 | 1.089747 | 444.7819 | 61.02172 | 23.62283 | 0.195862 | 0.721137 |
| 154.811  | 1.865391 | 1.089766 | 444.8078 | 61.02277 | 23.62325 | 0.195866 | 0.721218 |
| 154.8723 | 1.865423 | 1.089784 | 444.8336 | 61.02381 | 23.62366 | 0.195869 | 0.721299 |
| 154.9336 | 1.865456 | 1.089803 | 444.8594 | 61.02486 | 23.62408 | 0.195872 | 0.721379 |
| 154.9949 | 1.865489 | 1.089822 | 444.8852 | 61.0259  | 23.62449 | 0.195876 | 0.72146  |
| 155.0562 | 1.865522 | 1.08984  | 444.9109 | 61.02694 | 23.62491 | 0.195879 | 0.72154  |
| 155.1175 | 1.865554 | 1.089859 | 444.9366 | 61.02798 | 23.62532 | 0.195882 | 0.72162  |
| 155.1788 | 1.865587 | 1.089877 | 444.9623 | 61.02902 | 23.62574 | 0.195886 | 0.721701 |
| 155.24   | 1.865619 | 1.089896 | 444.9879 | 61.03006 | 23.62615 | 0.195889 | 0.721781 |
| 155.3013 | 1.865652 | 1.089914 | 445.0135 | 61.0311  | 23.62656 | 0.195892 | 0.721861 |
| 155.3626 | 1.865684 | 1.089933 | 445.0391 | 61.03213 | 23.62698 | 0.195896 | 0.721941 |
| 155.4239 | 1.865717 | 1.089951 | 445.0646 | 61.03317 | 23.62739 | 0.195899 | 0.722021 |

|          |          |          |          |          |          |          |          |
|----------|----------|----------|----------|----------|----------|----------|----------|
| 155.4852 | 1.865749 | 1.08997  | 445.0901 | 61.0342  | 23.6278  | 0.195902 | 0.7221   |
| 155.5465 | 1.865781 | 1.089988 | 445.1156 | 61.03523 | 23.62821 | 0.195906 | 0.72218  |
| 155.6078 | 1.865814 | 1.090006 | 445.1411 | 61.03626 | 23.62862 | 0.195909 | 0.72226  |
| 155.6691 | 1.865846 | 1.090025 | 445.1665 | 61.03729 | 23.62903 | 0.195912 | 0.722339 |
| 155.7303 | 1.865878 | 1.090043 | 445.1919 | 61.03832 | 23.62944 | 0.195915 | 0.722419 |
| 155.7916 | 1.86591  | 1.090062 | 445.2172 | 61.03935 | 23.62985 | 0.195919 | 0.722498 |
| 155.8529 | 1.865943 | 1.09008  | 445.2426 | 61.04037 | 23.63026 | 0.195922 | 0.722578 |
| 155.9142 | 1.865975 | 1.090098 | 445.2679 | 61.0414  | 23.63067 | 0.195925 | 0.722657 |
| 155.9755 | 1.866007 | 1.090116 | 445.2931 | 61.04242 | 23.63108 | 0.195929 | 0.722736 |
| 156.0368 | 1.866039 | 1.090135 | 445.3183 | 61.04344 | 23.63148 | 0.195932 | 0.722815 |
| 156.0981 | 1.866071 | 1.090153 | 445.3435 | 61.04446 | 23.63189 | 0.195935 | 0.722895 |
| 156.1593 | 1.866103 | 1.090171 | 445.3687 | 61.04548 | 23.63229 | 0.195938 | 0.722974 |
| 156.2206 | 1.866135 | 1.090189 | 445.3938 | 61.0465  | 23.6327  | 0.195942 | 0.723052 |
| 156.2819 | 1.866166 | 1.090207 | 445.4189 | 61.04751 | 23.6331  | 0.195945 | 0.723131 |
| 156.3432 | 1.866198 | 1.090225 | 445.444  | 61.04853 | 23.63351 | 0.195948 | 0.72321  |
| 156.4045 | 1.86623  | 1.090244 | 445.4691 | 61.04954 | 23.63391 | 0.195952 | 0.723289 |
| 156.4658 | 1.866262 | 1.090262 | 445.4941 | 61.05055 | 23.63432 | 0.195955 | 0.723367 |
| 156.5271 | 1.866294 | 1.09028  | 445.519  | 61.05157 | 23.63472 | 0.195958 | 0.723446 |
| 156.5884 | 1.866325 | 1.090298 | 445.544  | 61.05258 | 23.63512 | 0.195961 | 0.723524 |
| 156.6496 | 1.866357 | 1.090316 | 445.5689 | 61.05358 | 23.63552 | 0.195965 | 0.723603 |
| 156.7109 | 1.866388 | 1.090334 | 445.5938 | 61.05459 | 23.63593 | 0.195968 | 0.723681 |
| 156.7722 | 1.86642  | 1.090352 | 445.6187 | 61.0556  | 23.63633 | 0.195971 | 0.723759 |
| 156.8335 | 1.866452 | 1.09037  | 445.6435 | 61.0566  | 23.63673 | 0.195974 | 0.723838 |
| 156.8948 | 1.866483 | 1.090387 | 445.6683 | 61.05761 | 23.63713 | 0.195977 | 0.723916 |
| 156.9561 | 1.866514 | 1.090405 | 445.693  | 61.05861 | 23.63753 | 0.195981 | 0.723994 |
| 157.0174 | 1.866546 | 1.090423 | 445.7178 | 61.05961 | 23.63793 | 0.195984 | 0.724072 |
| 157.0787 | 1.866577 | 1.090441 | 445.7425 | 61.06061 | 23.63832 | 0.195987 | 0.72415  |
| 157.1399 | 1.866609 | 1.090459 | 445.7671 | 61.06161 | 23.63872 | 0.19599  | 0.724227 |
| 157.2012 | 1.86664  | 1.090477 | 445.7918 | 61.06261 | 23.63912 | 0.195994 | 0.724305 |
| 157.2625 | 1.866671 | 1.090495 | 445.8164 | 61.0636  | 23.63952 | 0.195997 | 0.724383 |
| 157.3238 | 1.866702 | 1.090512 | 445.841  | 61.0646  | 23.63991 | 0.196    | 0.72446  |
| 157.3851 | 1.866733 | 1.09053  | 445.8655 | 61.06559 | 23.64031 | 0.196003 | 0.724538 |
| 157.4464 | 1.866765 | 1.090548 | 445.89   | 61.06659 | 23.6407  | 0.196006 | 0.724615 |
| 157.5077 | 1.866796 | 1.090565 | 445.9145 | 61.06758 | 23.6411  | 0.196009 | 0.724693 |
| 157.5689 | 1.866827 | 1.090583 | 445.939  | 61.06857 | 23.64149 | 0.196013 | 0.72477  |
| 157.6302 | 1.866858 | 1.090601 | 445.9634 | 61.06956 | 23.64189 | 0.196016 | 0.724847 |
| 157.6915 | 1.866889 | 1.090618 | 445.9878 | 61.07054 | 23.64228 | 0.196019 | 0.724924 |
| 157.7528 | 1.86692  | 1.090636 | 446.0122 | 61.07153 | 23.64267 | 0.196022 | 0.725001 |
| 157.8141 | 1.866951 | 1.090654 | 446.0365 | 61.07252 | 23.64307 | 0.196025 | 0.725078 |
| 157.8754 | 1.866981 | 1.090671 | 446.0608 | 61.0735  | 23.64346 | 0.196029 | 0.725155 |
| 157.9367 | 1.867012 | 1.090689 | 446.0851 | 61.07448 | 23.64385 | 0.196032 | 0.725232 |
| 157.998  | 1.867043 | 1.090706 | 446.1094 | 61.07547 | 23.64424 | 0.196035 | 0.725309 |
| 158.0592 | 1.867074 | 1.090724 | 446.1336 | 61.07645 | 23.64463 | 0.196038 | 0.725386 |
| 158.1205 | 1.867104 | 1.090741 | 446.1578 | 61.07743 | 23.64502 | 0.196041 | 0.725462 |
| 158.1818 | 1.867135 | 1.090759 | 446.1819 | 61.0784  | 23.64541 | 0.196044 | 0.725539 |
| 158.2431 | 1.867166 | 1.090776 | 446.2061 | 61.07938 | 23.6458  | 0.196047 | 0.725615 |
| 158.3044 | 1.867196 | 1.090794 | 446.2301 | 61.08036 | 23.64619 | 0.196051 | 0.725692 |

|          |          |          |          |          |          |          |          |
|----------|----------|----------|----------|----------|----------|----------|----------|
| 158.3657 | 1.867227 | 1.090811 | 446.2542 | 61.08133 | 23.64658 | 0.196054 | 0.725768 |
| 158.427  | 1.867257 | 1.090828 | 446.2783 | 61.0823  | 23.64697 | 0.196057 | 0.725844 |
| 158.4883 | 1.867288 | 1.090846 | 446.3023 | 61.08328 | 23.64735 | 0.19606  | 0.72592  |
| 158.5495 | 1.867318 | 1.090863 | 446.3262 | 61.08425 | 23.64774 | 0.196063 | 0.725997 |
| 158.6108 | 1.867349 | 1.09088  | 446.3502 | 61.08522 | 23.64813 | 0.196066 | 0.726073 |
| 158.6721 | 1.867379 | 1.090898 | 446.3741 | 61.08618 | 23.64851 | 0.196069 | 0.726149 |
| 158.7334 | 1.867409 | 1.090915 | 446.398  | 61.08715 | 23.6489  | 0.196072 | 0.726224 |
| 158.7947 | 1.86744  | 1.090932 | 446.4219 | 61.08812 | 23.64928 | 0.196075 | 0.7263   |
| 158.856  | 1.86747  | 1.090949 | 446.4457 | 61.08908 | 23.64967 | 0.196079 | 0.726376 |
| 158.9173 | 1.8675   | 1.090967 | 446.4695 | 61.09005 | 23.65005 | 0.196082 | 0.726452 |
| 158.9785 | 1.86753  | 1.090984 | 446.4933 | 61.09101 | 23.65044 | 0.196085 | 0.726527 |
| 159.0398 | 1.867561 | 1.091001 | 446.517  | 61.09197 | 23.65082 | 0.196088 | 0.726603 |
| 159.1011 | 1.867591 | 1.091018 | 446.5407 | 61.09293 | 23.6512  | 0.196091 | 0.726678 |
| 159.1624 | 1.867621 | 1.091035 | 446.5644 | 61.09389 | 23.65158 | 0.196094 | 0.726754 |
| 159.2237 | 1.867651 | 1.091052 | 446.5881 | 61.09485 | 23.65196 | 0.196097 | 0.726829 |
| 159.285  | 1.867681 | 1.091069 | 446.6117 | 61.0958  | 23.65235 | 0.1961   | 0.726904 |
| 159.3463 | 1.867711 | 1.091086 | 446.6353 | 61.09676 | 23.65273 | 0.196103 | 0.72698  |
| 159.4076 | 1.867741 | 1.091103 | 446.6588 | 61.09771 | 23.65311 | 0.196106 | 0.727055 |
| 159.4688 | 1.86777  | 1.09112  | 446.6824 | 61.09867 | 23.65349 | 0.196109 | 0.72713  |
| 159.5301 | 1.8678   | 1.091137 | 446.7059 | 61.09962 | 23.65387 | 0.196112 | 0.727205 |
| 159.5914 | 1.86783  | 1.091154 | 446.7294 | 61.10057 | 23.65424 | 0.196115 | 0.72728  |
| 159.6527 | 1.86786  | 1.091171 | 446.7528 | 61.10152 | 23.65462 | 0.196119 | 0.727354 |
| 159.714  | 1.86789  | 1.091188 | 446.7763 | 61.10247 | 23.655   | 0.196122 | 0.727429 |
| 159.7753 | 1.867919 | 1.091205 | 446.7996 | 61.10341 | 23.65538 | 0.196125 | 0.727504 |
| 159.8366 | 1.867949 | 1.091222 | 446.823  | 61.10436 | 23.65575 | 0.196128 | 0.727578 |
| 159.8979 | 1.867979 | 1.091239 | 446.8463 | 61.1053  | 23.65613 | 0.196131 | 0.727653 |
| 159.9591 | 1.868008 | 1.091256 | 446.8697 | 61.10625 | 23.65651 | 0.196134 | 0.727727 |
| 160.0204 | 1.868038 | 1.091273 | 446.8929 | 61.10719 | 23.65688 | 0.196137 | 0.727802 |
| 160.0817 | 1.868067 | 1.091289 | 446.9162 | 61.10813 | 23.65726 | 0.19614  | 0.727876 |
| 160.143  | 1.868097 | 1.091306 | 446.9394 | 61.10907 | 23.65763 | 0.196143 | 0.72795  |
| 160.2043 | 1.868126 | 1.091323 | 446.9626 | 61.11001 | 23.65801 | 0.196146 | 0.728025 |
| 160.2656 | 1.868156 | 1.09134  | 446.9858 | 61.11095 | 23.65838 | 0.196149 | 0.728099 |
| 160.3269 | 1.868185 | 1.091356 | 447.0089 | 61.11189 | 23.65875 | 0.196152 | 0.728173 |
| 160.3882 | 1.868214 | 1.091373 | 447.032  | 61.11282 | 23.65913 | 0.196155 | 0.728247 |
| 160.4494 | 1.868244 | 1.09139  | 447.0551 | 61.11376 | 23.6595  | 0.196158 | 0.728321 |
| 160.5107 | 1.868273 | 1.091406 | 447.0781 | 61.11469 | 23.65987 | 0.196161 | 0.728394 |
| 160.572  | 1.868302 | 1.091423 | 447.1011 | 61.11562 | 23.66024 | 0.196164 | 0.728468 |
| 160.6333 | 1.868331 | 1.09144  | 447.1241 | 61.11655 | 23.66061 | 0.196167 | 0.728542 |
| 160.6946 | 1.86836  | 1.091456 | 447.1471 | 61.11748 | 23.66098 | 0.19617  | 0.728615 |
| 160.7559 | 1.86839  | 1.091473 | 447.17   | 61.11841 | 23.66135 | 0.196173 | 0.728689 |
| 160.8172 | 1.868419 | 1.091489 | 447.193  | 61.11934 | 23.66172 | 0.196176 | 0.728763 |
| 160.8784 | 1.868448 | 1.091506 | 447.2158 | 61.12026 | 23.66209 | 0.196179 | 0.728836 |
| 160.9397 | 1.868477 | 1.091523 | 447.2387 | 61.12119 | 23.66246 | 0.196182 | 0.728909 |
| 161.001  | 1.868506 | 1.091539 | 447.2615 | 61.12211 | 23.66283 | 0.196185 | 0.728983 |
| 161.0623 | 1.868535 | 1.091555 | 447.2843 | 61.12304 | 23.6632  | 0.196188 | 0.729056 |
| 161.1236 | 1.868564 | 1.091572 | 447.3071 | 61.12396 | 23.66356 | 0.196191 | 0.729129 |
| 161.1849 | 1.868592 | 1.091588 | 447.3298 | 61.12488 | 23.66393 | 0.196194 | 0.729202 |



|          |          |          |          |          |          |          |          |
|----------|----------|----------|----------|----------|----------|----------|----------|
| 161.2462 | 1.868621 | 1.091605 | 447.3525 | 61.1258  | 23.6643  | 0.196197 | 0.729275 |
| 161.3075 | 1.86865  | 1.091621 | 447.3752 | 61.12672 | 23.66466 | 0.1962   | 0.729348 |
| 161.3687 | 1.868679 | 1.091638 | 447.3979 | 61.12763 | 23.66503 | 0.196202 | 0.729421 |
| 161.43   | 1.868708 | 1.091654 | 447.4205 | 61.12855 | 23.66539 | 0.196205 | 0.729493 |
| 161.4913 | 1.868736 | 1.09167  | 447.4431 | 61.12947 | 23.66576 | 0.196208 | 0.729566 |
| 161.5526 | 1.868765 | 1.091687 | 447.4657 | 61.13038 | 23.66612 | 0.196211 | 0.729639 |
| 161.6139 | 1.868794 | 1.091703 | 447.4882 | 61.13129 | 23.66649 | 0.196214 | 0.729711 |
| 161.6752 | 1.868822 | 1.091719 | 447.5107 | 61.1322  | 23.66685 | 0.196217 | 0.729784 |
| 161.7365 | 1.868851 | 1.091735 | 447.5332 | 61.13312 | 23.66721 | 0.19622  | 0.729856 |
| 161.7978 | 1.868879 | 1.091752 | 447.5557 | 61.13402 | 23.66757 | 0.196223 | 0.729929 |
| 161.859  | 1.868908 | 1.091768 | 447.5781 | 61.13493 | 23.66794 | 0.196226 | 0.730001 |
| 161.9203 | 1.868936 | 1.091784 | 447.6005 | 61.13584 | 23.6683  | 0.196229 | 0.730073 |
| 161.9816 | 1.868965 | 1.0918   | 447.6229 | 61.13675 | 23.66866 | 0.196232 | 0.730145 |
| 162.0429 | 1.868993 | 1.091816 | 447.6453 | 61.13765 | 23.66902 | 0.196235 | 0.730217 |
| 162.1042 | 1.869021 | 1.091833 | 447.6676 | 61.13856 | 23.66938 | 0.196238 | 0.730289 |
| 162.1655 | 1.86905  | 1.091849 | 447.6899 | 61.13946 | 23.66974 | 0.19624  | 0.730361 |
| 162.2268 | 1.869078 | 1.091865 | 447.7121 | 61.14036 | 23.6701  | 0.196243 | 0.730433 |
| 162.288  | 1.869106 | 1.091881 | 447.7344 | 61.14126 | 23.67046 | 0.196246 | 0.730505 |
| 162.3493 | 1.869134 | 1.091897 | 447.7566 | 61.14216 | 23.67082 | 0.196249 | 0.730577 |
| 162.4106 | 1.869162 | 1.091913 | 447.7788 | 61.14306 | 23.67117 | 0.196252 | 0.730649 |
| 162.4719 | 1.869191 | 1.091929 | 447.801  | 61.14396 | 23.67153 | 0.196255 | 0.73072  |
| 162.5332 | 1.869219 | 1.091945 | 447.8231 | 61.14485 | 23.67189 | 0.196258 | 0.730792 |
| 162.5945 | 1.869247 | 1.091961 | 447.8452 | 61.14575 | 23.67225 | 0.196261 | 0.730863 |
| 162.6558 | 1.869275 | 1.091977 | 447.8673 | 61.14664 | 23.6726  | 0.196264 | 0.730935 |
| 162.7171 | 1.869303 | 1.091993 | 447.8893 | 61.14753 | 23.67296 | 0.196266 | 0.731006 |
| 162.7783 | 1.869331 | 1.092009 | 447.9114 | 61.14843 | 23.67331 | 0.196269 | 0.731077 |
| 162.8396 | 1.869359 | 1.092025 | 447.9333 | 61.14932 | 23.67367 | 0.196272 | 0.731148 |
| 162.9009 | 1.869387 | 1.09204  | 447.9553 | 61.15021 | 23.67402 | 0.196275 | 0.73122  |
| 162.9622 | 1.869414 | 1.092056 | 447.9772 | 61.15109 | 23.67438 | 0.196278 | 0.731291 |
| 163.0235 | 1.869442 | 1.092072 | 447.9991 | 61.15198 | 23.67473 | 0.196281 | 0.731362 |
| 163.0848 | 1.86947  | 1.092088 | 448.021  | 61.15287 | 23.67508 | 0.196284 | 0.731433 |
| 163.1461 | 1.869498 | 1.092104 | 448.0428 | 61.15375 | 23.67543 | 0.196286 | 0.731503 |
| 163.2074 | 1.869525 | 1.09212  | 448.0647 | 61.15463 | 23.67579 | 0.196289 | 0.731574 |
| 163.2686 | 1.869553 | 1.092135 | 448.0865 | 61.15552 | 23.67614 | 0.196292 | 0.731645 |
| 163.3299 | 1.869581 | 1.092151 | 448.1082 | 61.1564  | 23.67649 | 0.196295 | 0.731716 |
| 163.3912 | 1.869608 | 1.092167 | 448.13   | 61.15728 | 23.67684 | 0.196298 | 0.731786 |
| 163.4525 | 1.869636 | 1.092182 | 448.1517 | 61.15816 | 23.67719 | 0.196301 | 0.731857 |
| 163.5138 | 1.869663 | 1.092198 | 448.1734 | 61.15903 | 23.67754 | 0.196303 | 0.731927 |
| 163.5751 | 1.869691 | 1.092214 | 448.195  | 61.15991 | 23.67789 | 0.196306 | 0.731997 |
| 163.6364 | 1.869718 | 1.092229 | 448.2166 | 61.16079 | 23.67824 | 0.196309 | 0.732068 |
| 163.6977 | 1.869746 | 1.092245 | 448.2382 | 61.16166 | 23.67859 | 0.196312 | 0.732138 |
| 163.7589 | 1.869773 | 1.092261 | 448.2598 | 61.16254 | 23.67893 | 0.196315 | 0.732208 |
| 163.8202 | 1.869801 | 1.092276 | 448.2814 | 61.16341 | 23.67928 | 0.196317 | 0.732278 |
| 163.8815 | 1.869828 | 1.092292 | 448.3029 | 61.16428 | 23.67963 | 0.19632  | 0.732348 |
| 163.9428 | 1.869855 | 1.092307 | 448.3244 | 61.16515 | 23.67998 | 0.196323 | 0.732418 |
| 164.0041 | 1.869882 | 1.092323 | 448.3459 | 61.16602 | 23.68032 | 0.196326 | 0.732488 |
| 164.0654 | 1.86991  | 1.092338 | 448.3673 | 61.16689 | 23.68067 | 0.196329 | 0.732558 |

|          |          |          |          |          |          |          |          |
|----------|----------|----------|----------|----------|----------|----------|----------|
| 164.1267 | 1.869937 | 1.092354 | 448.3887 | 61.16775 | 23.68101 | 0.196331 | 0.732628 |
| 164.1879 | 1.869964 | 1.092369 | 448.4101 | 61.16862 | 23.68136 | 0.196334 | 0.732698 |
| 164.2492 | 1.869991 | 1.092385 | 448.4315 | 61.16949 | 23.6817  | 0.196337 | 0.732767 |
| 164.3105 | 1.870018 | 1.0924   | 448.4528 | 61.17035 | 23.68205 | 0.19634  | 0.732837 |
| 164.3718 | 1.870045 | 1.092415 | 448.4741 | 61.17121 | 23.68239 | 0.196342 | 0.732906 |
| 164.4331 | 1.870072 | 1.092431 | 448.4954 | 61.17207 | 23.68274 | 0.196345 | 0.732976 |
| 164.4944 | 1.870099 | 1.092446 | 448.5167 | 61.17293 | 23.68308 | 0.196348 | 0.733045 |
| 164.5557 | 1.870126 | 1.092462 | 448.5379 | 61.17379 | 23.68342 | 0.196351 | 0.733115 |
| 164.617  | 1.870153 | 1.092477 | 448.5591 | 61.17465 | 23.68376 | 0.196354 | 0.733184 |
| 164.6782 | 1.87018  | 1.092492 | 448.5803 | 61.17551 | 23.68411 | 0.196356 | 0.733253 |
| 164.7395 | 1.870207 | 1.092508 | 448.6014 | 61.17637 | 23.68445 | 0.196359 | 0.733322 |
| 164.8008 | 1.870234 | 1.092523 | 448.6225 | 61.17722 | 23.68479 | 0.196362 | 0.733391 |
| 164.8621 | 1.870261 | 1.092538 | 448.6436 | 61.17808 | 23.68513 | 0.196365 | 0.73346  |
| 164.9234 | 1.870287 | 1.092553 | 448.6647 | 61.17893 | 23.68547 | 0.196367 | 0.733529 |
| 164.9847 | 1.870314 | 1.092568 | 448.6858 | 61.17978 | 23.68581 | 0.19637  | 0.733598 |
| 165.046  | 1.870341 | 1.092584 | 448.7068 | 61.18063 | 23.68615 | 0.196373 | 0.733667 |
| 165.1073 | 1.870367 | 1.092599 | 448.7278 | 61.18148 | 23.68649 | 0.196375 | 0.733735 |
| 165.1685 | 1.870394 | 1.092614 | 448.7488 | 61.18233 | 23.68682 | 0.196378 | 0.733804 |
| 165.2298 | 1.870421 | 1.092629 | 448.7697 | 61.18318 | 23.68716 | 0.196381 | 0.733873 |
| 165.2911 | 1.870447 | 1.092644 | 448.7906 | 61.18403 | 23.6875  | 0.196384 | 0.733941 |
| 165.3524 | 1.870474 | 1.092659 | 448.8115 | 61.18487 | 23.68784 | 0.196386 | 0.73401  |
| 165.4137 | 1.8705   | 1.092674 | 448.8324 | 61.18572 | 23.68817 | 0.196389 | 0.734078 |
| 165.475  | 1.870527 | 1.09269  | 448.8532 | 61.18656 | 23.68851 | 0.196392 | 0.734146 |
| 165.5363 | 1.870553 | 1.092705 | 448.874  | 61.18741 | 23.68885 | 0.196394 | 0.734215 |
| 165.5975 | 1.87058  | 1.09272  | 448.8948 | 61.18825 | 23.68918 | 0.196397 | 0.734283 |
| 165.6588 | 1.870606 | 1.092735 | 448.9156 | 61.18909 | 23.68952 | 0.1964   | 0.734351 |
| 165.7201 | 1.870632 | 1.09275  | 448.9363 | 61.18993 | 23.68985 | 0.196403 | 0.734419 |
| 165.7814 | 1.870659 | 1.092765 | 448.957  | 61.19077 | 23.69018 | 0.196405 | 0.734487 |
| 165.8427 | 1.870685 | 1.09278  | 448.9777 | 61.1916  | 23.69052 | 0.196408 | 0.734555 |
| 165.904  | 1.870711 | 1.092794 | 448.9984 | 61.19244 | 23.69085 | 0.196411 | 0.734623 |
| 165.9653 | 1.870737 | 1.092809 | 449.019  | 61.19328 | 23.69118 | 0.196413 | 0.734691 |
| 166.0266 | 1.870763 | 1.092824 | 449.0396 | 61.19411 | 23.69152 | 0.196416 | 0.734758 |
| 166.0878 | 1.87079  | 1.092839 | 449.0602 | 61.19494 | 23.69185 | 0.196419 | 0.734826 |
| 166.1491 | 1.870816 | 1.092854 | 449.0808 | 61.19578 | 23.69218 | 0.196421 | 0.734894 |
| 166.2104 | 1.870842 | 1.092869 | 449.1013 | 61.19661 | 23.69251 | 0.196424 | 0.734961 |
| 166.2717 | 1.870868 | 1.092884 | 449.1218 | 61.19744 | 23.69284 | 0.196427 | 0.735029 |
| 166.333  | 1.870894 | 1.092898 | 449.1423 | 61.19827 | 23.69317 | 0.196429 | 0.735096 |
| 166.3943 | 1.87092  | 1.092913 | 449.1627 | 61.1991  | 23.6935  | 0.196432 | 0.735164 |
| 166.4556 | 1.870946 | 1.092928 | 449.1832 | 61.19992 | 23.69383 | 0.196435 | 0.735231 |
| 166.5169 | 1.870972 | 1.092943 | 449.2036 | 61.20075 | 23.69416 | 0.196437 | 0.735298 |
| 166.5781 | 1.870997 | 1.092958 | 449.224  | 61.20157 | 23.69449 | 0.19644  | 0.735365 |
| 166.6394 | 1.871023 | 1.092972 | 449.2443 | 61.2024  | 23.69482 | 0.196443 | 0.735432 |
| 166.7007 | 1.871049 | 1.092987 | 449.2646 | 61.20322 | 23.69515 | 0.196445 | 0.735499 |
| 166.762  | 1.871075 | 1.093002 | 449.2849 | 61.20404 | 23.69548 | 0.196448 | 0.735566 |
| 166.8233 | 1.871101 | 1.093016 | 449.3052 | 61.20487 | 23.6958  | 0.196451 | 0.735633 |
| 166.8846 | 1.871126 | 1.093031 | 449.3255 | 61.20569 | 23.69613 | 0.196453 | 0.7357   |
| 166.9459 | 1.871152 | 1.093046 | 449.3457 | 61.2065  | 23.69646 | 0.196456 | 0.735767 |

|          |          |          |          |          |          |          |          |
|----------|----------|----------|----------|----------|----------|----------|----------|
| 167.0072 | 1.871178 | 1.09306  | 449.3659 | 61.20732 | 23.69678 | 0.196458 | 0.735833 |
| 167.0684 | 1.871203 | 1.093075 | 449.3861 | 61.20814 | 23.69711 | 0.196461 | 0.7359   |
| 167.1297 | 1.871229 | 1.093089 | 449.4062 | 61.20896 | 23.69743 | 0.196464 | 0.735967 |
| 167.191  | 1.871255 | 1.093104 | 449.4264 | 61.20977 | 23.69776 | 0.196466 | 0.736033 |
| 167.2523 | 1.87128  | 1.093118 | 449.4465 | 61.21059 | 23.69808 | 0.196469 | 0.7361   |
| 167.3136 | 1.871306 | 1.093133 | 449.4666 | 61.2114  | 23.69841 | 0.196472 | 0.736166 |
| 167.3749 | 1.871331 | 1.093147 | 449.4866 | 61.21221 | 23.69873 | 0.196474 | 0.736232 |
| 167.4362 | 1.871356 | 1.093162 | 449.5066 | 61.21302 | 23.69905 | 0.196477 | 0.736299 |
| 167.4974 | 1.871382 | 1.093176 | 449.5266 | 61.21383 | 23.69938 | 0.196479 | 0.736365 |
| 167.5587 | 1.871407 | 1.093191 | 449.5466 | 61.21464 | 23.6997  | 0.196482 | 0.736431 |
| 167.62   | 1.871433 | 1.093205 | 449.5666 | 61.21545 | 23.70002 | 0.196485 | 0.736497 |
| 167.6813 | 1.871458 | 1.09322  | 449.5865 | 61.21626 | 23.70034 | 0.196487 | 0.736563 |
| 167.7426 | 1.871483 | 1.093234 | 449.6064 | 61.21706 | 23.70066 | 0.19649  | 0.736629 |
| 167.8039 | 1.871508 | 1.093248 | 449.6263 | 61.21787 | 23.70098 | 0.196492 | 0.736695 |
| 167.8652 | 1.871534 | 1.093263 | 449.6462 | 61.21867 | 23.7013  | 0.196495 | 0.736761 |
| 167.9265 | 1.871559 | 1.093277 | 449.666  | 61.21947 | 23.70162 | 0.196498 | 0.736826 |
| 167.9877 | 1.871584 | 1.093291 | 449.6858 | 61.22028 | 23.70194 | 0.1965   | 0.736892 |
| 168.049  | 1.871609 | 1.093306 | 449.7056 | 61.22108 | 23.70226 | 0.196503 | 0.736958 |
| 168.1103 | 1.871634 | 1.09332  | 449.7253 | 61.22188 | 23.70258 | 0.196505 | 0.737023 |
| 168.1716 | 1.871659 | 1.093334 | 449.7451 | 61.22268 | 23.7029  | 0.196508 | 0.737089 |
| 168.2329 | 1.871684 | 1.093348 | 449.7648 | 61.22347 | 23.70322 | 0.19651  | 0.737154 |
| 168.2942 | 1.871709 | 1.093363 | 449.7845 | 61.22427 | 23.70354 | 0.196513 | 0.73722  |
| 168.3555 | 1.871734 | 1.093377 | 449.8041 | 61.22507 | 23.70385 | 0.196515 | 0.737285 |
| 168.4168 | 1.871759 | 1.093391 | 449.8238 | 61.22586 | 23.70417 | 0.196518 | 0.73735  |
| 168.478  | 1.871784 | 1.093405 | 449.8434 | 61.22666 | 23.70449 | 0.196521 | 0.737415 |
| 168.5393 | 1.871809 | 1.093419 | 449.863  | 61.22745 | 23.7048  | 0.196523 | 0.737481 |
| 168.6006 | 1.871834 | 1.093434 | 449.8825 | 61.22824 | 23.70512 | 0.196526 | 0.737546 |
| 168.6619 | 1.871859 | 1.093448 | 449.9021 | 61.22903 | 23.70543 | 0.196528 | 0.737611 |
| 168.7232 | 1.871883 | 1.093462 | 449.9216 | 61.22982 | 23.70575 | 0.196531 | 0.737676 |
| 168.7845 | 1.871908 | 1.093476 | 449.9411 | 61.23061 | 23.70606 | 0.196533 | 0.73774  |
| 168.8458 | 1.871933 | 1.09349  | 449.9606 | 61.2314  | 23.70638 | 0.196536 | 0.737805 |
| 168.907  | 1.871958 | 1.093504 | 449.98   | 61.23219 | 23.70669 | 0.196538 | 0.73787  |
| 168.9683 | 1.871982 | 1.093518 | 449.9994 | 61.23298 | 23.707   | 0.196541 | 0.737935 |
| 169.0296 | 1.872007 | 1.093532 | 450.0188 | 61.23376 | 23.70732 | 0.196543 | 0.737999 |
| 169.0909 | 1.872031 | 1.093546 | 450.0382 | 61.23455 | 23.70763 | 0.196546 | 0.738064 |
| 169.1522 | 1.872056 | 1.09356  | 450.0575 | 61.23533 | 23.70794 | 0.196548 | 0.738128 |
| 169.2135 | 1.872081 | 1.093574 | 450.0769 | 61.23611 | 23.70825 | 0.196551 | 0.738193 |
| 169.2748 | 1.872105 | 1.093588 | 450.0962 | 61.23689 | 23.70856 | 0.196553 | 0.738257 |
| 169.3361 | 1.872129 | 1.093602 | 450.1154 | 61.23767 | 23.70888 | 0.196556 | 0.738322 |
| 169.3973 | 1.872154 | 1.093616 | 450.1347 | 61.23845 | 23.70919 | 0.196559 | 0.738386 |
| 169.4586 | 1.872178 | 1.09363  | 450.1539 | 61.23923 | 23.7095  | 0.196561 | 0.73845  |
| 169.5199 | 1.872203 | 1.093644 | 450.1731 | 61.24001 | 23.70981 | 0.196564 | 0.738514 |
| 169.5812 | 1.872227 | 1.093657 | 450.1923 | 61.24079 | 23.71012 | 0.196566 | 0.738578 |
| 169.6425 | 1.872251 | 1.093671 | 450.2115 | 61.24156 | 23.71042 | 0.196568 | 0.738642 |
| 169.7038 | 1.872276 | 1.093685 | 450.2306 | 61.24234 | 23.71073 | 0.196571 | 0.738706 |
| 169.7651 | 1.8723   | 1.093699 | 450.2497 | 61.24311 | 23.71104 | 0.196573 | 0.73877  |
| 169.8264 | 1.872324 | 1.093713 | 450.2688 | 61.24388 | 23.71135 | 0.196576 | 0.738834 |

|          |          |          |          |          |          |          |          |
|----------|----------|----------|----------|----------|----------|----------|----------|
| 169.8876 | 1.872348 | 1.093727 | 450.2879 | 61.24466 | 23.71166 | 0.196578 | 0.738898 |
| 169.9489 | 1.872373 | 1.09374  | 450.3069 | 61.24543 | 23.71196 | 0.196581 | 0.738961 |
| 170.0102 | 1.872397 | 1.093754 | 450.3259 | 61.2462  | 23.71227 | 0.196583 | 0.739025 |
| 170.0715 | 1.872421 | 1.093768 | 450.3449 | 61.24697 | 23.71258 | 0.196586 | 0.739089 |
| 170.1328 | 1.872445 | 1.093782 | 450.3639 | 61.24773 | 23.71288 | 0.196588 | 0.739152 |
| 170.1941 | 1.872469 | 1.093795 | 450.3828 | 61.2485  | 23.71319 | 0.196591 | 0.739216 |
| 170.2554 | 1.872493 | 1.093809 | 450.4017 | 61.24927 | 23.7135  | 0.196593 | 0.739279 |
| 170.3166 | 1.872517 | 1.093823 | 450.4206 | 61.25003 | 23.7138  | 0.196596 | 0.739342 |
| 170.3779 | 1.872541 | 1.093836 | 450.4395 | 61.2508  | 23.7141  | 0.196598 | 0.739406 |
| 170.4392 | 1.872565 | 1.09385  | 450.4584 | 61.25156 | 23.71441 | 0.196601 | 0.739469 |
| 170.5005 | 1.872589 | 1.093863 | 450.4772 | 61.25232 | 23.71471 | 0.196603 | 0.739532 |
| 170.5618 | 1.872613 | 1.093877 | 450.496  | 61.25308 | 23.71502 | 0.196606 | 0.739595 |
| 170.6231 | 1.872637 | 1.093891 | 450.5148 | 61.25384 | 23.71532 | 0.196608 | 0.739658 |
| 170.6844 | 1.87266  | 1.093904 | 450.5335 | 61.2546  | 23.71562 | 0.19661  | 0.739721 |
| 170.7457 | 1.872684 | 1.093918 | 450.5523 | 61.25536 | 23.71592 | 0.196613 | 0.739784 |
| 170.8069 | 1.872708 | 1.093931 | 450.571  | 61.25612 | 23.71623 | 0.196615 | 0.739847 |
| 170.8682 | 1.872732 | 1.093945 | 450.5897 | 61.25688 | 23.71653 | 0.196618 | 0.73991  |
| 170.9295 | 1.872755 | 1.093958 | 450.6083 | 61.25763 | 23.71683 | 0.19662  | 0.739972 |
| 170.9908 | 1.872779 | 1.093972 | 450.627  | 61.25839 | 23.71713 | 0.196623 | 0.740035 |
| 171.0521 | 1.872803 | 1.093985 | 450.6456 | 61.25914 | 23.71743 | 0.196625 | 0.740098 |
| 171.1134 | 1.872826 | 1.093999 | 450.6642 | 61.2599  | 23.71773 | 0.196627 | 0.74016  |
| 171.1747 | 1.87285  | 1.094012 | 450.6828 | 61.26065 | 23.71803 | 0.19663  | 0.740223 |
| 171.236  | 1.872874 | 1.094025 | 450.7013 | 61.2614  | 23.71833 | 0.196632 | 0.740285 |
| 171.2972 | 1.872897 | 1.094039 | 450.7199 | 61.26215 | 23.71863 | 0.196635 | 0.740347 |
| 171.3585 | 1.872921 | 1.094052 | 450.7384 | 61.2629  | 23.71893 | 0.196637 | 0.74041  |
| 171.4198 | 1.872944 | 1.094066 | 450.7569 | 61.26365 | 23.71923 | 0.196639 | 0.740472 |
| 171.4811 | 1.872967 | 1.094079 | 450.7753 | 61.26439 | 23.71952 | 0.196642 | 0.740534 |
| 171.5424 | 1.872991 | 1.094092 | 450.7937 | 61.26514 | 23.71982 | 0.196644 | 0.740596 |
| 171.6037 | 1.873014 | 1.094106 | 450.8122 | 61.26589 | 23.72012 | 0.196647 | 0.740658 |
| 171.665  | 1.873038 | 1.094119 | 450.8306 | 61.26663 | 23.72041 | 0.196649 | 0.74072  |
| 171.7263 | 1.873061 | 1.094132 | 450.8489 | 61.26738 | 23.72071 | 0.196651 | 0.740782 |
| 171.7875 | 1.873084 | 1.094145 | 450.8673 | 61.26812 | 23.72101 | 0.196654 | 0.740844 |
| 171.8488 | 1.873108 | 1.094159 | 450.8856 | 61.26886 | 23.7213  | 0.196656 | 0.740906 |
| 171.9101 | 1.873131 | 1.094172 | 450.9039 | 61.2696  | 23.7216  | 0.196659 | 0.740968 |
| 171.9714 | 1.873154 | 1.094185 | 450.9222 | 61.27034 | 23.72189 | 0.196661 | 0.741029 |
| 172.0327 | 1.873177 | 1.094198 | 450.9404 | 61.27108 | 23.72219 | 0.196663 | 0.741091 |
| 172.094  | 1.8732   | 1.094211 | 450.9587 | 61.27182 | 23.72248 | 0.196666 | 0.741153 |
| 172.1553 | 1.873223 | 1.094225 | 450.9769 | 61.27256 | 23.72278 | 0.196668 | 0.741214 |
| 172.2165 | 1.873247 | 1.094238 | 450.9951 | 61.27329 | 23.72307 | 0.19667  | 0.741276 |
| 172.2778 | 1.87327  | 1.094251 | 451.0132 | 61.27403 | 23.72336 | 0.196673 | 0.741337 |
| 172.3391 | 1.873293 | 1.094264 | 451.0314 | 61.27476 | 23.72366 | 0.196675 | 0.741398 |
| 172.4004 | 1.873316 | 1.094277 | 451.0495 | 61.2755  | 23.72395 | 0.196678 | 0.74146  |
| 172.4617 | 1.873339 | 1.09429  | 451.0676 | 61.27623 | 23.72424 | 0.19668  | 0.741521 |
| 172.523  | 1.873362 | 1.094303 | 451.0857 | 61.27696 | 23.72453 | 0.196682 | 0.741582 |
| 172.5843 | 1.873385 | 1.094316 | 451.1037 | 61.27769 | 23.72482 | 0.196685 | 0.741643 |
| 172.6456 | 1.873407 | 1.094329 | 451.1218 | 61.27842 | 23.72511 | 0.196687 | 0.741704 |
| 172.7068 | 1.87343  | 1.094342 | 451.1398 | 61.27915 | 23.7254  | 0.196689 | 0.741765 |

|          |          |          |          |          |          |          |          |
|----------|----------|----------|----------|----------|----------|----------|----------|
| 172.7681 | 1.873453 | 1.094355 | 451.1578 | 61.27988 | 23.72569 | 0.196692 | 0.741826 |
| 172.8294 | 1.873476 | 1.094368 | 451.1757 | 61.28061 | 23.72598 | 0.196694 | 0.741887 |
| 172.8907 | 1.873499 | 1.094381 | 451.1937 | 61.28134 | 23.72627 | 0.196696 | 0.741948 |
| 172.952  | 1.873521 | 1.094394 | 451.2116 | 61.28206 | 23.72656 | 0.196699 | 0.742009 |
| 173.0133 | 1.873544 | 1.094407 | 451.2295 | 61.28279 | 23.72685 | 0.196701 | 0.742069 |
| 173.0746 | 1.873567 | 1.09442  | 451.2474 | 61.28351 | 23.72714 | 0.196703 | 0.74213  |
| 173.1359 | 1.87359  | 1.094433 | 451.2652 | 61.28423 | 23.72743 | 0.196706 | 0.742191 |
| 173.1971 | 1.873612 | 1.094446 | 451.2831 | 61.28496 | 23.72772 | 0.196708 | 0.742251 |
| 173.2584 | 1.873635 | 1.094459 | 451.3009 | 61.28568 | 23.728   | 0.19671  | 0.742312 |
| 173.3197 | 1.873657 | 1.094472 | 451.3187 | 61.2864  | 23.72829 | 0.196713 | 0.742372 |
| 173.381  | 1.87368  | 1.094485 | 451.3364 | 61.28712 | 23.72858 | 0.196715 | 0.742433 |
| 173.4423 | 1.873703 | 1.094497 | 451.3542 | 61.28784 | 23.72886 | 0.196717 | 0.742493 |
| 173.5036 | 1.873725 | 1.09451  | 451.3719 | 61.28855 | 23.72915 | 0.196719 | 0.742553 |
| 173.5649 | 1.873748 | 1.094523 | 451.3896 | 61.28927 | 23.72944 | 0.196722 | 0.742613 |
| 173.6261 | 1.87377  | 1.094536 | 451.4073 | 61.28999 | 23.72972 | 0.196724 | 0.742673 |
| 173.6874 | 1.873792 | 1.094549 | 451.4249 | 61.2907  | 23.73001 | 0.196726 | 0.742733 |
| 173.7487 | 1.873815 | 1.094561 | 451.4426 | 61.29142 | 23.73029 | 0.196729 | 0.742793 |
| 173.81   | 1.873837 | 1.094574 | 451.4602 | 61.29213 | 23.73057 | 0.196731 | 0.742853 |
| 173.8713 | 1.87386  | 1.094587 | 451.4778 | 61.29284 | 23.73086 | 0.196733 | 0.742913 |
| 173.9326 | 1.873882 | 1.094599 | 451.4954 | 61.29355 | 23.73114 | 0.196736 | 0.742973 |
| 173.9939 | 1.873904 | 1.094612 | 451.5129 | 61.29426 | 23.73143 | 0.196738 | 0.743033 |
| 174.0552 | 1.873926 | 1.094625 | 451.5304 | 61.29497 | 23.73171 | 0.19674  | 0.743093 |
| 174.1164 | 1.873949 | 1.094637 | 451.5479 | 61.29568 | 23.73199 | 0.196742 | 0.743152 |
| 174.1777 | 1.873971 | 1.09465  | 451.5654 | 61.29639 | 23.73227 | 0.196745 | 0.743212 |
| 174.239  | 1.873993 | 1.094663 | 451.5829 | 61.2971  | 23.73255 | 0.196747 | 0.743271 |
| 174.3003 | 1.874015 | 1.094675 | 451.6003 | 61.2978  | 23.73284 | 0.196749 | 0.743331 |
| 174.3616 | 1.874037 | 1.094688 | 451.6178 | 61.29851 | 23.73312 | 0.196751 | 0.74339  |
| 174.4229 | 1.874059 | 1.094701 | 451.6352 | 61.29921 | 23.7334  | 0.196754 | 0.74345  |
| 174.4842 | 1.874081 | 1.094713 | 451.6525 | 61.29992 | 23.73368 | 0.196756 | 0.743509 |
| 174.5455 | 1.874103 | 1.094726 | 451.6699 | 61.30062 | 23.73396 | 0.196758 | 0.743568 |
| 174.6067 | 1.874125 | 1.094738 | 451.6872 | 61.30132 | 23.73424 | 0.19676  | 0.743627 |
| 174.668  | 1.874147 | 1.094751 | 451.7045 | 61.30202 | 23.73452 | 0.196763 | 0.743687 |
| 174.7293 | 1.874169 | 1.094763 | 451.7218 | 61.30272 | 23.7348  | 0.196765 | 0.743746 |
| 174.7906 | 1.874191 | 1.094776 | 451.7391 | 61.30342 | 23.73508 | 0.196767 | 0.743805 |
| 174.8519 | 1.874213 | 1.094788 | 451.7564 | 61.30412 | 23.73535 | 0.196769 | 0.743864 |
| 174.9132 | 1.874235 | 1.094801 | 451.7736 | 61.30482 | 23.73563 | 0.196772 | 0.743923 |
| 174.9745 | 1.874257 | 1.094813 | 451.7908 | 61.30552 | 23.73591 | 0.196774 | 0.743982 |
| 175.0358 | 1.874279 | 1.094825 | 451.808  | 61.30621 | 23.73619 | 0.196776 | 0.74404  |
| 175.097  | 1.874301 | 1.094838 | 451.8251 | 61.30691 | 23.73646 | 0.196778 | 0.744099 |
| 175.1583 | 1.874322 | 1.09485  | 451.8423 | 61.3076  | 23.73674 | 0.196781 | 0.744158 |
| 175.2196 | 1.874344 | 1.094863 | 451.8594 | 61.30829 | 23.73702 | 0.196783 | 0.744216 |
| 175.2809 | 1.874366 | 1.094875 | 451.8765 | 61.30899 | 23.73729 | 0.196785 | 0.744275 |
| 175.3422 | 1.874388 | 1.094887 | 451.8936 | 61.30968 | 23.73757 | 0.196787 | 0.744333 |
| 175.4035 | 1.874409 | 1.0949   | 451.9106 | 61.31037 | 23.73784 | 0.19679  | 0.744392 |
| 175.4648 | 1.874431 | 1.094912 | 451.9277 | 61.31106 | 23.73812 | 0.196792 | 0.74445  |
| 175.526  | 1.874452 | 1.094924 | 451.9447 | 61.31175 | 23.73839 | 0.196794 | 0.744509 |
| 175.5873 | 1.874474 | 1.094937 | 451.9617 | 61.31244 | 23.73867 | 0.196796 | 0.744567 |

|          |          |          |          |          |          |          |          |
|----------|----------|----------|----------|----------|----------|----------|----------|
| 175.6486 | 1.874496 | 1.094949 | 451.9786 | 61.31312 | 23.73894 | 0.196798 | 0.744625 |
| 175.7099 | 1.874517 | 1.094961 | 451.9956 | 61.31381 | 23.73921 | 0.196801 | 0.744683 |
| 175.7712 | 1.874539 | 1.094973 | 452.0125 | 61.31449 | 23.73949 | 0.196803 | 0.744742 |
| 175.8325 | 1.87456  | 1.094986 | 452.0294 | 61.31518 | 23.73976 | 0.196805 | 0.7448   |
| 175.8938 | 1.874581 | 1.094998 | 452.0463 | 61.31586 | 23.74003 | 0.196807 | 0.744858 |
| 175.9551 | 1.874603 | 1.09501  | 452.0632 | 61.31655 | 23.7403  | 0.196809 | 0.744916 |
| 176.0163 | 1.874624 | 1.095022 | 452.08   | 61.31723 | 23.74058 | 0.196812 | 0.744973 |
| 176.0776 | 1.874646 | 1.095034 | 452.0968 | 61.31791 | 23.74085 | 0.196814 | 0.745031 |
| 176.1389 | 1.874667 | 1.095046 | 452.1136 | 61.31859 | 23.74112 | 0.196816 | 0.745089 |
| 176.2002 | 1.874688 | 1.095059 | 452.1304 | 61.31927 | 23.74139 | 0.196818 | 0.745147 |
| 176.2615 | 1.87471  | 1.095071 | 452.1472 | 61.31995 | 23.74166 | 0.19682  | 0.745205 |
| 176.3228 | 1.874731 | 1.095083 | 452.1639 | 61.32063 | 23.74193 | 0.196823 | 0.745262 |
| 176.3841 | 1.874752 | 1.095095 | 452.1806 | 61.3213  | 23.7422  | 0.196825 | 0.74532  |
| 176.4454 | 1.874773 | 1.095107 | 452.1973 | 61.32198 | 23.74247 | 0.196827 | 0.745377 |
| 176.5066 | 1.874794 | 1.095119 | 452.214  | 61.32266 | 23.74274 | 0.196829 | 0.745435 |
| 176.5679 | 1.874816 | 1.095131 | 452.2307 | 61.32333 | 23.74301 | 0.196831 | 0.745492 |
| 176.6292 | 1.874837 | 1.095143 | 452.2473 | 61.324   | 23.74328 | 0.196833 | 0.745549 |
| 176.6905 | 1.874858 | 1.095155 | 452.2639 | 61.32468 | 23.74354 | 0.196836 | 0.745607 |
| 176.7518 | 1.874879 | 1.095167 | 452.2805 | 61.32535 | 23.74381 | 0.196838 | 0.745664 |
| 176.8131 | 1.8749   | 1.095179 | 452.2971 | 61.32602 | 23.74408 | 0.19684  | 0.745721 |
| 176.8744 | 1.874921 | 1.095191 | 452.3137 | 61.32669 | 23.74435 | 0.196842 | 0.745778 |
| 176.9356 | 1.874942 | 1.095203 | 452.3302 | 61.32736 | 23.74461 | 0.196844 | 0.745835 |
| 176.9969 | 1.874963 | 1.095215 | 452.3467 | 61.32803 | 23.74488 | 0.196846 | 0.745892 |
| 177.0582 | 1.874984 | 1.095227 | 452.3632 | 61.3287  | 23.74515 | 0.196848 | 0.745949 |
| 177.1195 | 1.875005 | 1.095239 | 452.3797 | 61.32936 | 23.74541 | 0.196851 | 0.746006 |
| 177.1808 | 1.875026 | 1.095251 | 452.3961 | 61.33003 | 23.74568 | 0.196853 | 0.746063 |
| 177.2421 | 1.875047 | 1.095262 | 452.4126 | 61.3307  | 23.74594 | 0.196855 | 0.74612  |
| 177.3034 | 1.875067 | 1.095274 | 452.429  | 61.33136 | 23.74621 | 0.196857 | 0.746177 |
| 177.3647 | 1.875088 | 1.095286 | 452.4454 | 61.33202 | 23.74647 | 0.196859 | 0.746233 |
| 177.4259 | 1.875109 | 1.095298 | 452.4617 | 61.33269 | 23.74674 | 0.196861 | 0.74629  |
| 177.4872 | 1.87513  | 1.09531  | 452.4781 | 61.33335 | 23.747   | 0.196863 | 0.746346 |
| 177.5485 | 1.875151 | 1.095322 | 452.4944 | 61.33401 | 23.74726 | 0.196866 | 0.746403 |
| 177.6098 | 1.875171 | 1.095333 | 452.5107 | 61.33467 | 23.74753 | 0.196868 | 0.746459 |
| 177.6711 | 1.875192 | 1.095345 | 452.527  | 61.33533 | 23.74779 | 0.19687  | 0.746516 |
| 177.7324 | 1.875213 | 1.095357 | 452.5433 | 61.33599 | 23.74805 | 0.196872 | 0.746572 |
| 177.7937 | 1.875233 | 1.095369 | 452.5595 | 61.33665 | 23.74832 | 0.196874 | 0.746628 |
| 177.855  | 1.875254 | 1.09538  | 452.5758 | 61.33731 | 23.74858 | 0.196876 | 0.746685 |
| 177.9162 | 1.875274 | 1.095392 | 452.592  | 61.33796 | 23.74884 | 0.196878 | 0.746741 |
| 177.9775 | 1.875295 | 1.095404 | 452.6082 | 61.33862 | 23.7491  | 0.19688  | 0.746797 |
| 178.0388 | 1.875316 | 1.095416 | 452.6243 | 61.33927 | 23.74936 | 0.196882 | 0.746853 |
| 178.1001 | 1.875336 | 1.095427 | 452.6405 | 61.33993 | 23.74962 | 0.196885 | 0.746909 |
| 178.1614 | 1.875357 | 1.095439 | 452.6566 | 61.34058 | 23.74988 | 0.196887 | 0.746965 |
| 178.2227 | 1.875377 | 1.095451 | 452.6727 | 61.34123 | 23.75014 | 0.196889 | 0.747021 |
| 178.284  | 1.875397 | 1.095462 | 452.6888 | 61.34188 | 23.7504  | 0.196891 | 0.747077 |
| 178.3453 | 1.875418 | 1.095474 | 452.7049 | 61.34253 | 23.75066 | 0.196893 | 0.747133 |
| 178.4065 | 1.875438 | 1.095485 | 452.7209 | 61.34318 | 23.75092 | 0.196895 | 0.747188 |
| 178.4678 | 1.875459 | 1.095497 | 452.737  | 61.34383 | 23.75118 | 0.196897 | 0.747244 |

|          |          |          |          |          |          |          |          |
|----------|----------|----------|----------|----------|----------|----------|----------|
| 178.5291 | 1.875479 | 1.095509 | 452.753  | 61.34448 | 23.75144 | 0.196899 | 0.7473   |
| 178.5904 | 1.875499 | 1.09552  | 452.769  | 61.34513 | 23.75169 | 0.196901 | 0.747355 |
| 178.6517 | 1.87552  | 1.095532 | 452.7849 | 61.34578 | 23.75195 | 0.196903 | 0.747411 |
| 178.713  | 1.87554  | 1.095543 | 452.8009 | 61.34642 | 23.75221 | 0.196905 | 0.747466 |
| 178.7743 | 1.87556  | 1.095555 | 452.8168 | 61.34707 | 23.75247 | 0.196907 | 0.747522 |
| 178.8355 | 1.87558  | 1.095566 | 452.8327 | 61.34771 | 23.75272 | 0.19691  | 0.747577 |
| 178.8968 | 1.8756   | 1.095578 | 452.8486 | 61.34836 | 23.75298 | 0.196912 | 0.747633 |
| 178.9581 | 1.875621 | 1.095589 | 452.8645 | 61.349   | 23.75324 | 0.196914 | 0.747688 |
| 179.0194 | 1.875641 | 1.095601 | 452.8804 | 61.34964 | 23.75349 | 0.196916 | 0.747743 |
| 179.0807 | 1.875661 | 1.095612 | 452.8962 | 61.35028 | 23.75375 | 0.196918 | 0.747798 |
| 179.142  | 1.875681 | 1.095624 | 452.912  | 61.35092 | 23.754   | 0.19692  | 0.747853 |
| 179.2033 | 1.875701 | 1.095635 | 452.9278 | 61.35156 | 23.75426 | 0.196922 | 0.747908 |
| 179.2646 | 1.875721 | 1.095646 | 452.9436 | 61.3522  | 23.75451 | 0.196924 | 0.747963 |
| 179.3258 | 1.875741 | 1.095658 | 452.9593 | 61.35284 | 23.75477 | 0.196926 | 0.748018 |
| 179.3871 | 1.875761 | 1.095669 | 452.9751 | 61.35348 | 23.75502 | 0.196928 | 0.748073 |
| 179.4484 | 1.875781 | 1.095681 | 452.9908 | 61.35411 | 23.75527 | 0.19693  | 0.748128 |
| 179.5097 | 1.875801 | 1.095692 | 453.0065 | 61.35475 | 23.75553 | 0.196932 | 0.748183 |
| 179.571  | 1.875821 | 1.095703 | 453.0222 | 61.35538 | 23.75578 | 0.196934 | 0.748238 |
| 179.6323 | 1.875841 | 1.095715 | 453.0378 | 61.35602 | 23.75603 | 0.196936 | 0.748292 |
| 179.6936 | 1.875861 | 1.095726 | 453.0535 | 61.35665 | 23.75629 | 0.196938 | 0.748347 |
| 179.7549 | 1.87588  | 1.095737 | 453.0691 | 61.35728 | 23.75654 | 0.19694  | 0.748402 |
| 179.8161 | 1.8759   | 1.095748 | 453.0847 | 61.35791 | 23.75679 | 0.196942 | 0.748456 |
| 179.8774 | 1.87592  | 1.09576  | 453.1003 | 61.35855 | 23.75704 | 0.196944 | 0.748511 |
| 179.9387 | 1.87594  | 1.095771 | 453.1158 | 61.35918 | 23.75729 | 0.196946 | 0.748565 |
| 180      | 1.87596  | 1.095782 | 453.1314 | 61.35981 | 23.75754 | 0.196948 | 0.748619 |
| 180.0613 | 1.875979 | 1.095793 | 453.1469 | 61.36043 | 23.75779 | 0.19695  | 0.748674 |
| 180.1226 | 1.875999 | 1.095805 | 453.1624 | 61.36106 | 23.75804 | 0.196952 | 0.748728 |
| 180.1839 | 1.876019 | 1.095816 | 453.1779 | 61.36169 | 23.75829 | 0.196954 | 0.748782 |
| 180.2451 | 1.876038 | 1.095827 | 453.1933 | 61.36232 | 23.75854 | 0.196956 | 0.748836 |
| 180.3064 | 1.876058 | 1.095838 | 453.2088 | 61.36294 | 23.75879 | 0.196958 | 0.74889  |
| 180.3677 | 1.876077 | 1.095849 | 453.2242 | 61.36357 | 23.75904 | 0.19696  | 0.748944 |
| 180.429  | 1.876097 | 1.09586  | 453.2396 | 61.36419 | 23.75929 | 0.196962 | 0.748998 |
| 180.4903 | 1.876117 | 1.095872 | 453.255  | 61.36481 | 23.75954 | 0.196964 | 0.749052 |
| 180.5516 | 1.876136 | 1.095883 | 453.2704 | 61.36544 | 23.75979 | 0.196966 | 0.749106 |
| 180.6129 | 1.876156 | 1.095894 | 453.2857 | 61.36606 | 23.76003 | 0.196968 | 0.74916  |
| 180.6742 | 1.876175 | 1.095905 | 453.3011 | 61.36668 | 23.76028 | 0.19697  | 0.749214 |
| 180.7354 | 1.876195 | 1.095916 | 453.3164 | 61.3673  | 23.76053 | 0.196972 | 0.749268 |
| 180.7967 | 1.876214 | 1.095927 | 453.3317 | 61.36792 | 23.76078 | 0.196974 | 0.749321 |
| 180.858  | 1.876233 | 1.095938 | 453.3469 | 61.36854 | 23.76102 | 0.196976 | 0.749375 |
| 180.9193 | 1.876253 | 1.095949 | 453.3622 | 61.36915 | 23.76127 | 0.196978 | 0.749429 |
| 180.9806 | 1.876272 | 1.09596  | 453.3774 | 61.36977 | 23.76151 | 0.19698  | 0.749482 |
| 181.0419 | 1.876291 | 1.095971 | 453.3927 | 61.37039 | 23.76176 | 0.196982 | 0.749536 |
| 181.1032 | 1.876311 | 1.095982 | 453.4079 | 61.371   | 23.76201 | 0.196984 | 0.749589 |
| 181.1645 | 1.87633  | 1.095993 | 453.423  | 61.37162 | 23.76225 | 0.196986 | 0.749642 |
| 181.2257 | 1.876349 | 1.096004 | 453.4382 | 61.37223 | 23.7625  | 0.196988 | 0.749696 |
| 181.287  | 1.876368 | 1.096015 | 453.4533 | 61.37285 | 23.76274 | 0.19699  | 0.749749 |
| 181.3483 | 1.876388 | 1.096026 | 453.4685 | 61.37346 | 23.76298 | 0.196992 | 0.749802 |

|          |          |          |          |          |          |          |          |
|----------|----------|----------|----------|----------|----------|----------|----------|
| 181.4096 | 1.876407 | 1.096037 | 453.4836 | 61.37407 | 23.76323 | 0.196994 | 0.749855 |
| 181.4709 | 1.876426 | 1.096048 | 453.4987 | 61.37468 | 23.76347 | 0.196996 | 0.749909 |
| 181.5322 | 1.876445 | 1.096059 | 453.5137 | 61.37529 | 23.76371 | 0.196998 | 0.749962 |
| 181.5935 | 1.876464 | 1.096069 | 453.5288 | 61.3759  | 23.76396 | 0.197    | 0.750015 |
| 181.6547 | 1.876483 | 1.09608  | 453.5438 | 61.37651 | 23.7642  | 0.197002 | 0.750068 |
| 181.716  | 1.876502 | 1.096091 | 453.5588 | 61.37712 | 23.76444 | 0.197004 | 0.75012  |
| 181.7773 | 1.876521 | 1.096102 | 453.5738 | 61.37772 | 23.76468 | 0.197006 | 0.750173 |
| 181.8386 | 1.876541 | 1.096113 | 453.5888 | 61.37833 | 23.76493 | 0.197008 | 0.750226 |
| 181.8999 | 1.87656  | 1.096124 | 453.6037 | 61.37894 | 23.76517 | 0.19701  | 0.750279 |
| 181.9612 | 1.876578 | 1.096134 | 453.6187 | 61.37954 | 23.76541 | 0.197012 | 0.750332 |
| 182.0225 | 1.876597 | 1.096145 | 453.6336 | 61.38015 | 23.76565 | 0.197014 | 0.750384 |
| 182.0838 | 1.876616 | 1.096156 | 453.6485 | 61.38075 | 23.76589 | 0.197016 | 0.750437 |
| 182.145  | 1.876635 | 1.096167 | 453.6634 | 61.38135 | 23.76613 | 0.197018 | 0.750489 |
| 182.2063 | 1.876654 | 1.096178 | 453.6783 | 61.38195 | 23.76637 | 0.19702  | 0.750542 |
| 182.2676 | 1.876673 | 1.096188 | 453.6931 | 61.38256 | 23.76661 | 0.197021 | 0.750594 |
| 182.3289 | 1.876692 | 1.096199 | 453.7079 | 61.38316 | 23.76685 | 0.197023 | 0.750647 |
| 182.3902 | 1.876711 | 1.09621  | 453.7227 | 61.38376 | 23.76709 | 0.197025 | 0.750699 |
| 182.4515 | 1.876729 | 1.09622  | 453.7375 | 61.38435 | 23.76733 | 0.197027 | 0.750751 |
| 182.5128 | 1.876748 | 1.096231 | 453.7523 | 61.38495 | 23.76756 | 0.197029 | 0.750804 |
| 182.5741 | 1.876767 | 1.096242 | 453.7671 | 61.38555 | 23.7678  | 0.197031 | 0.750856 |
| 182.6353 | 1.876786 | 1.096252 | 453.7818 | 61.38615 | 23.76804 | 0.197033 | 0.750908 |
| 182.6966 | 1.876804 | 1.096263 | 453.7965 | 61.38674 | 23.76828 | 0.197035 | 0.75096  |
| 182.7579 | 1.876823 | 1.096274 | 453.8112 | 61.38734 | 23.76852 | 0.197037 | 0.751012 |
| 182.8192 | 1.876842 | 1.096284 | 453.8259 | 61.38793 | 23.76875 | 0.197039 | 0.751064 |
| 182.8805 | 1.87686  | 1.096295 | 453.8406 | 61.38853 | 23.76899 | 0.197041 | 0.751116 |
| 182.9418 | 1.876879 | 1.096305 | 453.8552 | 61.38912 | 23.76923 | 0.197043 | 0.751168 |
| 183.0031 | 1.876897 | 1.096316 | 453.8698 | 61.38971 | 23.76946 | 0.197044 | 0.75122  |
| 183.0644 | 1.876916 | 1.096327 | 453.8844 | 61.3903  | 23.7697  | 0.197046 | 0.751272 |
| 183.1256 | 1.876935 | 1.096337 | 453.899  | 61.3909  | 23.76993 | 0.197048 | 0.751323 |
| 183.1869 | 1.876953 | 1.096348 | 453.9136 | 61.39149 | 23.77017 | 0.19705  | 0.751375 |
| 183.2482 | 1.876972 | 1.096358 | 453.9281 | 61.39207 | 23.7704  | 0.197052 | 0.751427 |
| 183.3095 | 1.87699  | 1.096369 | 453.9427 | 61.39266 | 23.77064 | 0.197054 | 0.751478 |
| 183.3708 | 1.877008 | 1.096379 | 453.9572 | 61.39325 | 23.77087 | 0.197056 | 0.75153  |
| 183.4321 | 1.877027 | 1.09639  | 453.9717 | 61.39384 | 23.77111 | 0.197058 | 0.751581 |
| 183.4934 | 1.877045 | 1.0964   | 453.9862 | 61.39443 | 23.77134 | 0.19706  | 0.751633 |
| 183.5546 | 1.877064 | 1.096411 | 454.0006 | 61.39501 | 23.77157 | 0.197062 | 0.751684 |
| 183.6159 | 1.877082 | 1.096421 | 454.0151 | 61.3956  | 23.77181 | 0.197063 | 0.751736 |
| 183.6772 | 1.8771   | 1.096431 | 454.0295 | 61.39618 | 23.77204 | 0.197065 | 0.751787 |
| 183.7385 | 1.877119 | 1.096442 | 454.0439 | 61.39676 | 23.77227 | 0.197067 | 0.751838 |
| 183.7998 | 1.877137 | 1.096452 | 454.0583 | 61.39735 | 23.7725  | 0.197069 | 0.751889 |
| 183.8611 | 1.877155 | 1.096463 | 454.0727 | 61.39793 | 23.77274 | 0.197071 | 0.75194  |
| 183.9224 | 1.877173 | 1.096473 | 454.0871 | 61.39851 | 23.77297 | 0.197073 | 0.751991 |
| 183.9837 | 1.877192 | 1.096483 | 454.1014 | 61.39909 | 23.7732  | 0.197075 | 0.752043 |
| 184.0449 | 1.87721  | 1.096494 | 454.1157 | 61.39967 | 23.77343 | 0.197076 | 0.752094 |
| 184.1062 | 1.877228 | 1.096504 | 454.13   | 61.40025 | 23.77366 | 0.197078 | 0.752144 |
| 184.1675 | 1.877246 | 1.096514 | 454.1443 | 61.40083 | 23.77389 | 0.19708  | 0.752195 |
| 184.2288 | 1.877264 | 1.096525 | 454.1586 | 61.40141 | 23.77412 | 0.197082 | 0.752246 |



|          |          |          |          |          |          |          |          |
|----------|----------|----------|----------|----------|----------|----------|----------|
| 184.2901 | 1.877282 | 1.096535 | 454.1728 | 61.40198 | 23.77435 | 0.197084 | 0.752297 |
| 184.3514 | 1.8773   | 1.096545 | 454.1871 | 61.40256 | 23.77458 | 0.197086 | 0.752348 |
| 184.4127 | 1.877318 | 1.096556 | 454.2013 | 61.40314 | 23.77481 | 0.197088 | 0.752398 |
| 184.474  | 1.877336 | 1.096566 | 454.2155 | 61.40371 | 23.77504 | 0.197089 | 0.752449 |
| 184.5352 | 1.877355 | 1.096576 | 454.2297 | 61.40429 | 23.77527 | 0.197091 | 0.7525   |
| 184.5965 | 1.877372 | 1.096586 | 454.2438 | 61.40486 | 23.7755  | 0.197093 | 0.75255  |
| 184.6578 | 1.87739  | 1.096597 | 454.258  | 61.40543 | 23.77573 | 0.197095 | 0.752601 |
| 184.7191 | 1.877408 | 1.096607 | 454.2721 | 61.406   | 23.77595 | 0.197097 | 0.752651 |
| 184.7804 | 1.877426 | 1.096617 | 454.2862 | 61.40658 | 23.77618 | 0.197099 | 0.752702 |
| 184.8417 | 1.877444 | 1.096627 | 454.3003 | 61.40715 | 23.77641 | 0.197101 | 0.752752 |
| 184.903  | 1.877462 | 1.096637 | 454.3144 | 61.40772 | 23.77664 | 0.197102 | 0.752802 |
| 184.9642 | 1.87748  | 1.096648 | 454.3284 | 61.40829 | 23.77686 | 0.197104 | 0.752853 |
| 185.0255 | 1.877498 | 1.096658 | 454.3425 | 61.40885 | 23.77709 | 0.197106 | 0.752903 |
| 185.0868 | 1.877516 | 1.096668 | 454.3565 | 61.40942 | 23.77732 | 0.197108 | 0.752953 |
| 185.1481 | 1.877533 | 1.096678 | 454.3705 | 61.40999 | 23.77754 | 0.19711  | 0.753003 |
| 185.2094 | 1.877551 | 1.096688 | 454.3845 | 61.41056 | 23.77777 | 0.197111 | 0.753053 |
| 185.2707 | 1.877569 | 1.096698 | 454.3984 | 61.41112 | 23.77799 | 0.197113 | 0.753103 |
| 185.332  | 1.877587 | 1.096708 | 454.4124 | 61.41169 | 23.77822 | 0.197115 | 0.753153 |
| 185.3933 | 1.877604 | 1.096718 | 454.4263 | 61.41225 | 23.77844 | 0.197117 | 0.753203 |
| 185.4545 | 1.877622 | 1.096728 | 454.4403 | 61.41282 | 23.77867 | 0.197119 | 0.753253 |
| 185.5158 | 1.87764  | 1.096738 | 454.4542 | 61.41338 | 23.77889 | 0.197121 | 0.753303 |
| 185.5771 | 1.877657 | 1.096749 | 454.468  | 61.41394 | 23.77912 | 0.197122 | 0.753352 |
| 185.6384 | 1.877675 | 1.096759 | 454.4819 | 61.4145  | 23.77934 | 0.197124 | 0.753402 |
| 185.6997 | 1.877693 | 1.096769 | 454.4958 | 61.41506 | 23.77956 | 0.197126 | 0.753452 |
| 185.761  | 1.87771  | 1.096779 | 454.5096 | 61.41562 | 23.77979 | 0.197128 | 0.753501 |
| 185.8223 | 1.877728 | 1.096789 | 454.5234 | 61.41618 | 23.78001 | 0.19713  | 0.753551 |
| 185.8836 | 1.877745 | 1.096799 | 454.5372 | 61.41674 | 23.78023 | 0.197131 | 0.753601 |
| 185.9448 | 1.877763 | 1.096809 | 454.551  | 61.4173  | 23.78046 | 0.197133 | 0.75365  |
| 186.0061 | 1.87778  | 1.096818 | 454.5647 | 61.41786 | 23.78068 | 0.197135 | 0.753699 |
| 186.0674 | 1.877798 | 1.096828 | 454.5785 | 61.41841 | 23.7809  | 0.197137 | 0.753749 |
| 186.1287 | 1.877815 | 1.096838 | 454.5922 | 61.41897 | 23.78112 | 0.197138 | 0.753798 |
| 186.19   | 1.877832 | 1.096848 | 454.6059 | 61.41953 | 23.78134 | 0.19714  | 0.753847 |
| 186.2513 | 1.87785  | 1.096858 | 454.6196 | 61.42008 | 23.78156 | 0.197142 | 0.753897 |
| 186.3126 | 1.877867 | 1.096868 | 454.6333 | 61.42063 | 23.78178 | 0.197144 | 0.753946 |
| 186.3739 | 1.877885 | 1.096878 | 454.647  | 61.42119 | 23.782   | 0.197146 | 0.753995 |
| 186.4351 | 1.877902 | 1.096888 | 454.6606 | 61.42174 | 23.78223 | 0.197147 | 0.754044 |
| 186.4964 | 1.877919 | 1.096898 | 454.6742 | 61.42229 | 23.78245 | 0.197149 | 0.754093 |
| 186.5577 | 1.877937 | 1.096907 | 454.6878 | 61.42284 | 23.78266 | 0.197151 | 0.754142 |
| 186.619  | 1.877954 | 1.096917 | 454.7014 | 61.42339 | 23.78288 | 0.197153 | 0.754191 |
| 186.6803 | 1.877971 | 1.096927 | 454.715  | 61.42394 | 23.7831  | 0.197154 | 0.75424  |
| 186.7416 | 1.877988 | 1.096937 | 454.7286 | 61.42449 | 23.78332 | 0.197156 | 0.754289 |
| 186.8029 | 1.878005 | 1.096947 | 454.7421 | 61.42504 | 23.78354 | 0.197158 | 0.754338 |
| 186.8641 | 1.878023 | 1.096956 | 454.7556 | 61.42559 | 23.78376 | 0.19716  | 0.754386 |
| 186.9254 | 1.87804  | 1.096966 | 454.7692 | 61.42614 | 23.78398 | 0.197162 | 0.754435 |
| 186.9867 | 1.878057 | 1.096976 | 454.7826 | 61.42668 | 23.7842  | 0.197163 | 0.754484 |
| 187.048  | 1.878074 | 1.096986 | 454.7961 | 61.42723 | 23.78441 | 0.197165 | 0.754532 |
| 187.1093 | 1.878091 | 1.096995 | 454.8096 | 61.42777 | 23.78463 | 0.197167 | 0.754581 |

|          |          |          |          |          |          |          |          |
|----------|----------|----------|----------|----------|----------|----------|----------|
| 187.1706 | 1.878108 | 1.097005 | 454.823  | 61.42832 | 23.78485 | 0.197169 | 0.75463  |
| 187.2319 | 1.878125 | 1.097015 | 454.8365 | 61.42886 | 23.78506 | 0.19717  | 0.754678 |
| 187.2932 | 1.878142 | 1.097025 | 454.8499 | 61.42941 | 23.78528 | 0.197172 | 0.754726 |
| 187.3544 | 1.878159 | 1.097034 | 454.8633 | 61.42995 | 23.7855  | 0.197174 | 0.754775 |
| 187.4157 | 1.878176 | 1.097044 | 454.8766 | 61.43049 | 23.78571 | 0.197176 | 0.754823 |
| 187.477  | 1.878193 | 1.097054 | 454.89   | 61.43103 | 23.78593 | 0.197177 | 0.754871 |
| 187.5383 | 1.87821  | 1.097063 | 454.9033 | 61.43157 | 23.78614 | 0.197179 | 0.75492  |
| 187.5996 | 1.878227 | 1.097073 | 454.9167 | 61.43211 | 23.78636 | 0.197181 | 0.754968 |
| 187.6609 | 1.878244 | 1.097083 | 454.93   | 61.43265 | 23.78657 | 0.197182 | 0.755016 |
| 187.7222 | 1.878261 | 1.097092 | 454.9433 | 61.43319 | 23.78679 | 0.197184 | 0.755064 |
| 187.7835 | 1.878278 | 1.097102 | 454.9566 | 61.43373 | 23.787   | 0.197186 | 0.755112 |
| 187.8447 | 1.878295 | 1.097111 | 454.9698 | 61.43426 | 23.78722 | 0.197188 | 0.75516  |
| 187.906  | 1.878312 | 1.097121 | 454.9831 | 61.4348  | 23.78743 | 0.197189 | 0.755208 |
| 187.9673 | 1.878328 | 1.09713  | 454.9963 | 61.43534 | 23.78764 | 0.197191 | 0.755256 |
| 188.0286 | 1.878345 | 1.09714  | 455.0095 | 61.43587 | 23.78786 | 0.197193 | 0.755304 |
| 188.0899 | 1.878362 | 1.09715  | 455.0227 | 61.43641 | 23.78807 | 0.197195 | 0.755352 |
| 188.1512 | 1.878379 | 1.097159 | 455.0359 | 61.43694 | 23.78828 | 0.197196 | 0.7554   |
| 188.2125 | 1.878395 | 1.097169 | 455.0491 | 61.43747 | 23.7885  | 0.197198 | 0.755447 |
| 188.2737 | 1.878412 | 1.097178 | 455.0622 | 61.43801 | 23.78871 | 0.1972   | 0.755495 |
| 188.335  | 1.878429 | 1.097188 | 455.0753 | 61.43854 | 23.78892 | 0.197201 | 0.755543 |
| 188.3963 | 1.878445 | 1.097197 | 455.0884 | 61.43907 | 23.78913 | 0.197203 | 0.75559  |
| 188.4576 | 1.878462 | 1.097207 | 455.1015 | 61.4396  | 23.78934 | 0.197205 | 0.755638 |
| 188.5189 | 1.878479 | 1.097216 | 455.1146 | 61.44013 | 23.78955 | 0.197206 | 0.755685 |
| 188.5802 | 1.878495 | 1.097225 | 455.1277 | 61.44066 | 23.78976 | 0.197208 | 0.755733 |
| 188.6415 | 1.878512 | 1.097235 | 455.1407 | 61.44119 | 23.78998 | 0.19721  | 0.75578  |
| 188.7028 | 1.878528 | 1.097244 | 455.1538 | 61.44171 | 23.79019 | 0.197212 | 0.755827 |
| 188.764  | 1.878545 | 1.097254 | 455.1668 | 61.44224 | 23.7904  | 0.197213 | 0.755875 |
| 188.8253 | 1.878561 | 1.097263 | 455.1798 | 61.44277 | 23.79061 | 0.197215 | 0.755922 |
| 188.8866 | 1.878578 | 1.097273 | 455.1928 | 61.44329 | 23.79082 | 0.197217 | 0.755969 |
| 188.9479 | 1.878594 | 1.097282 | 455.2058 | 61.44382 | 23.79102 | 0.197218 | 0.756016 |
| 189.0092 | 1.878611 | 1.097291 | 455.2187 | 61.44434 | 23.79123 | 0.19722  | 0.756063 |
| 189.0705 | 1.878627 | 1.097301 | 455.2316 | 61.44487 | 23.79144 | 0.197222 | 0.756111 |
| 189.1318 | 1.878644 | 1.09731  | 455.2446 | 61.44539 | 23.79165 | 0.197223 | 0.756158 |
| 189.1931 | 1.87866  | 1.097319 | 455.2575 | 61.44591 | 23.79186 | 0.197225 | 0.756205 |
| 189.2543 | 1.878676 | 1.097329 | 455.2704 | 61.44644 | 23.79207 | 0.197227 | 0.756252 |
| 189.3156 | 1.878693 | 1.097338 | 455.2832 | 61.44696 | 23.79228 | 0.197228 | 0.756298 |
| 189.3769 | 1.878709 | 1.097347 | 455.2961 | 61.44748 | 23.79248 | 0.19723  | 0.756345 |
| 189.4382 | 1.878725 | 1.097357 | 455.3089 | 61.448   | 23.79269 | 0.197232 | 0.756392 |
| 189.4995 | 1.878742 | 1.097366 | 455.3218 | 61.44852 | 23.7929  | 0.197233 | 0.756439 |
| 189.5608 | 1.878758 | 1.097375 | 455.3346 | 61.44904 | 23.7931  | 0.197235 | 0.756486 |
| 189.6221 | 1.878774 | 1.097384 | 455.3474 | 61.44955 | 23.79331 | 0.197237 | 0.756532 |
| 189.6834 | 1.878791 | 1.097394 | 455.3601 | 61.45007 | 23.79352 | 0.197238 | 0.756579 |
| 189.7446 | 1.878807 | 1.097403 | 455.3729 | 61.45059 | 23.79372 | 0.19724  | 0.756625 |
| 189.8059 | 1.878823 | 1.097412 | 455.3856 | 61.45111 | 23.79393 | 0.197242 | 0.756672 |
| 189.8672 | 1.878839 | 1.097421 | 455.3984 | 61.45162 | 23.79413 | 0.197243 | 0.756718 |
| 189.9285 | 1.878855 | 1.09743  | 455.4111 | 61.45214 | 23.79434 | 0.197245 | 0.756765 |
| 189.9898 | 1.878871 | 1.09744  | 455.4238 | 61.45265 | 23.79454 | 0.197247 | 0.756811 |

|          |          |          |          |          |          |          |          |
|----------|----------|----------|----------|----------|----------|----------|----------|
| 190.0511 | 1.878888 | 1.097449 | 455.4365 | 61.45316 | 23.79475 | 0.197248 | 0.756858 |
| 190.1124 | 1.878904 | 1.097458 | 455.4491 | 61.45368 | 23.79495 | 0.19725  | 0.756904 |
| 190.1736 | 1.87892  | 1.097467 | 455.4618 | 61.45419 | 23.79516 | 0.197252 | 0.75695  |
| 190.2349 | 1.878936 | 1.097476 | 455.4744 | 61.4547  | 23.79536 | 0.197253 | 0.756996 |
| 190.2962 | 1.878952 | 1.097485 | 455.4871 | 61.45521 | 23.79557 | 0.197255 | 0.757043 |
| 190.3575 | 1.878968 | 1.097494 | 455.4997 | 61.45572 | 23.79577 | 0.197257 | 0.757089 |
| 190.4188 | 1.878984 | 1.097504 | 455.5122 | 61.45623 | 23.79597 | 0.197258 | 0.757135 |
| 190.4801 | 1.879    | 1.097513 | 455.5248 | 61.45674 | 23.79618 | 0.19726  | 0.757181 |
| 190.5414 | 1.879016 | 1.097522 | 455.5374 | 61.45725 | 23.79638 | 0.197261 | 0.757227 |
| 190.6027 | 1.879032 | 1.097531 | 455.5499 | 61.45776 | 23.79658 | 0.197263 | 0.757273 |
| 190.6639 | 1.879048 | 1.09754  | 455.5624 | 61.45827 | 23.79678 | 0.197265 | 0.757319 |
| 190.7252 | 1.879063 | 1.097549 | 455.575  | 61.45877 | 23.79698 | 0.197266 | 0.757364 |
| 190.7865 | 1.879079 | 1.097558 | 455.5875 | 61.45928 | 23.79719 | 0.197268 | 0.75741  |
| 190.8478 | 1.879095 | 1.097567 | 455.5999 | 61.45978 | 23.79739 | 0.19727  | 0.757456 |
| 190.9091 | 1.879111 | 1.097576 | 455.6124 | 61.46029 | 23.79759 | 0.197271 | 0.757502 |
| 190.9704 | 1.879127 | 1.097585 | 455.6248 | 61.46079 | 23.79779 | 0.197273 | 0.757547 |
| 191.0317 | 1.879143 | 1.097594 | 455.6373 | 61.4613  | 23.79799 | 0.197274 | 0.757593 |
| 191.093  | 1.879158 | 1.097603 | 455.6497 | 61.4618  | 23.79819 | 0.197276 | 0.757639 |
| 191.1542 | 1.879174 | 1.097612 | 455.6621 | 61.4623  | 23.79839 | 0.197278 | 0.757684 |
| 191.2155 | 1.87919  | 1.097621 | 455.6745 | 61.4628  | 23.79859 | 0.197279 | 0.75773  |
| 191.2768 | 1.879206 | 1.09763  | 455.6869 | 61.46331 | 23.79879 | 0.197281 | 0.757775 |
| 191.3381 | 1.879221 | 1.097639 | 455.6992 | 61.46381 | 23.79899 | 0.197283 | 0.757821 |
| 191.3994 | 1.879237 | 1.097648 | 455.7116 | 61.46431 | 23.79919 | 0.197284 | 0.757866 |
| 191.4607 | 1.879253 | 1.097657 | 455.7239 | 61.46481 | 23.79939 | 0.197286 | 0.757911 |
| 191.522  | 1.879268 | 1.097665 | 455.7362 | 61.4653  | 23.79959 | 0.197287 | 0.757956 |
| 191.5832 | 1.879284 | 1.097674 | 455.7485 | 61.4658  | 23.79979 | 0.197289 | 0.758002 |
| 191.6445 | 1.879299 | 1.097683 | 455.7608 | 61.4663  | 23.79998 | 0.197291 | 0.758047 |
| 191.7058 | 1.879315 | 1.097692 | 455.773  | 61.4668  | 23.80018 | 0.197292 | 0.758092 |
| 191.7671 | 1.879331 | 1.097701 | 455.7853 | 61.46729 | 23.80038 | 0.197294 | 0.758137 |
| 191.8284 | 1.879346 | 1.09771  | 455.7975 | 61.46779 | 23.80058 | 0.197295 | 0.758182 |
| 191.8897 | 1.879362 | 1.097719 | 455.8097 | 61.46828 | 23.80077 | 0.197297 | 0.758227 |
| 191.951  | 1.879377 | 1.097727 | 455.8219 | 61.46878 | 23.80097 | 0.197299 | 0.758272 |
| 192.0123 | 1.879393 | 1.097736 | 455.8341 | 61.46927 | 23.80117 | 0.1973   | 0.758317 |
| 192.0735 | 1.879408 | 1.097745 | 455.8463 | 61.46976 | 23.80136 | 0.197302 | 0.758362 |
| 192.1348 | 1.879424 | 1.097754 | 455.8585 | 61.47026 | 23.80156 | 0.197303 | 0.758407 |
| 192.1961 | 1.879439 | 1.097763 | 455.8706 | 61.47075 | 23.80176 | 0.197305 | 0.758452 |
| 192.2574 | 1.879454 | 1.097771 | 455.8827 | 61.47124 | 23.80195 | 0.197306 | 0.758496 |
| 192.3187 | 1.87947  | 1.09778  | 455.8949 | 61.47173 | 23.80215 | 0.197308 | 0.758541 |
| 192.38   | 1.879485 | 1.097789 | 455.9069 | 61.47222 | 23.80234 | 0.19731  | 0.758586 |
| 192.4413 | 1.879501 | 1.097798 | 455.919  | 61.47271 | 23.80254 | 0.197311 | 0.75863  |
| 192.5026 | 1.879516 | 1.097806 | 455.9311 | 61.4732  | 23.80273 | 0.197313 | 0.758675 |
| 192.5638 | 1.879531 | 1.097815 | 455.9432 | 61.47369 | 23.80293 | 0.197314 | 0.758719 |
| 192.6251 | 1.879546 | 1.097824 | 455.9552 | 61.47417 | 23.80312 | 0.197316 | 0.758764 |
| 192.6864 | 1.879562 | 1.097833 | 455.9672 | 61.47466 | 23.80332 | 0.197317 | 0.758808 |
| 192.7477 | 1.879577 | 1.097841 | 455.9792 | 61.47515 | 23.80351 | 0.197319 | 0.758853 |
| 192.809  | 1.879592 | 1.09785  | 455.9912 | 61.47563 | 23.8037  | 0.197321 | 0.758897 |
| 192.8703 | 1.879607 | 1.097859 | 456.0032 | 61.47612 | 23.8039  | 0.197322 | 0.758941 |

|          |          |          |          |          |          |          |          |
|----------|----------|----------|----------|----------|----------|----------|----------|
| 192.9316 | 1.879623 | 1.097867 | 456.0152 | 61.4766  | 23.80409 | 0.197324 | 0.758986 |
| 192.9928 | 1.879638 | 1.097876 | 456.0271 | 61.47709 | 23.80428 | 0.197325 | 0.75903  |
| 193.0541 | 1.879653 | 1.097884 | 456.039  | 61.47757 | 23.80448 | 0.197327 | 0.759074 |
| 193.1154 | 1.879668 | 1.097893 | 456.051  | 61.47805 | 23.80467 | 0.197328 | 0.759118 |
| 193.1767 | 1.879683 | 1.097902 | 456.0629 | 61.47854 | 23.80486 | 0.19733  | 0.759162 |
| 193.238  | 1.879698 | 1.09791  | 456.0748 | 61.47902 | 23.80505 | 0.197331 | 0.759206 |
| 193.2993 | 1.879713 | 1.097919 | 456.0866 | 61.4795  | 23.80524 | 0.197333 | 0.75925  |
| 193.3606 | 1.879729 | 1.097927 | 456.0985 | 61.47998 | 23.80544 | 0.197335 | 0.759294 |
| 193.4219 | 1.879744 | 1.097936 | 456.1103 | 61.48046 | 23.80563 | 0.197336 | 0.759338 |
| 193.4831 | 1.879759 | 1.097945 | 456.1222 | 61.48094 | 23.80582 | 0.197338 | 0.759382 |
| 193.5444 | 1.879774 | 1.097953 | 456.134  | 61.48142 | 23.80601 | 0.197339 | 0.759426 |
| 193.6057 | 1.879789 | 1.097962 | 456.1458 | 61.48189 | 23.8062  | 0.197341 | 0.75947  |
| 193.667  | 1.879804 | 1.09797  | 456.1576 | 61.48237 | 23.80639 | 0.197342 | 0.759514 |
| 193.7283 | 1.879819 | 1.097979 | 456.1694 | 61.48285 | 23.80658 | 0.197344 | 0.759557 |
| 193.7896 | 1.879833 | 1.097987 | 456.1811 | 61.48333 | 23.80677 | 0.197345 | 0.759601 |
| 193.8509 | 1.879848 | 1.097996 | 456.1929 | 61.4838  | 23.80696 | 0.197347 | 0.759645 |
| 193.9122 | 1.879863 | 1.098004 | 456.2046 | 61.48428 | 23.80715 | 0.197348 | 0.759688 |
| 193.9734 | 1.879878 | 1.098013 | 456.2163 | 61.48475 | 23.80734 | 0.19735  | 0.759732 |
| 194.0347 | 1.879893 | 1.098021 | 456.228  | 61.48522 | 23.80753 | 0.197351 | 0.759775 |
| 194.096  | 1.879908 | 1.09803  | 456.2397 | 61.4857  | 23.80772 | 0.197353 | 0.759819 |
| 194.1573 | 1.879923 | 1.098038 | 456.2513 | 61.48617 | 23.8079  | 0.197354 | 0.759862 |
| 194.2186 | 1.879938 | 1.098046 | 456.263  | 61.48664 | 23.80809 | 0.197356 | 0.759905 |
| 194.2799 | 1.879952 | 1.098055 | 456.2746 | 61.48711 | 23.80828 | 0.197357 | 0.759949 |
| 194.3412 | 1.879967 | 1.098063 | 456.2863 | 61.48758 | 23.80847 | 0.197359 | 0.759992 |
| 194.4025 | 1.879982 | 1.098072 | 456.2979 | 61.48806 | 23.80865 | 0.19736  | 0.760035 |
| 194.4637 | 1.879997 | 1.09808  | 456.3095 | 61.48853 | 23.80884 | 0.197362 | 0.760078 |
| 194.525  | 1.880011 | 1.098088 | 456.3211 | 61.48899 | 23.80903 | 0.197363 | 0.760122 |
| 194.5863 | 1.880026 | 1.098097 | 456.3326 | 61.48946 | 23.80922 | 0.197365 | 0.760165 |
| 194.6476 | 1.880041 | 1.098105 | 456.3442 | 61.48993 | 23.8094  | 0.197366 | 0.760208 |
| 194.7089 | 1.880055 | 1.098113 | 456.3557 | 61.4904  | 23.80959 | 0.197368 | 0.760251 |
| 194.7702 | 1.88007  | 1.098122 | 456.3673 | 61.49087 | 23.80977 | 0.197369 | 0.760294 |
| 194.8315 | 1.880085 | 1.09813  | 456.3788 | 61.49133 | 23.80996 | 0.197371 | 0.760337 |
| 194.8927 | 1.880099 | 1.098138 | 456.3903 | 61.4918  | 23.81015 | 0.197372 | 0.76038  |
| 194.954  | 1.880114 | 1.098147 | 456.4018 | 61.49226 | 23.81033 | 0.197374 | 0.760422 |
| 195.0153 | 1.880128 | 1.098155 | 456.4132 | 61.49273 | 23.81052 | 0.197375 | 0.760465 |
| 195.0766 | 1.880143 | 1.098163 | 456.4247 | 61.49319 | 23.8107  | 0.197377 | 0.760508 |
| 195.1379 | 1.880157 | 1.098172 | 456.4361 | 61.49365 | 23.81089 | 0.197378 | 0.760551 |
| 195.1992 | 1.880172 | 1.09818  | 456.4475 | 61.49412 | 23.81107 | 0.19738  | 0.760593 |
| 195.2605 | 1.880186 | 1.098188 | 456.459  | 61.49458 | 23.81125 | 0.197381 | 0.760636 |
| 195.3218 | 1.880201 | 1.098196 | 456.4704 | 61.49504 | 23.81144 | 0.197383 | 0.760679 |
| 195.383  | 1.880215 | 1.098205 | 456.4817 | 61.4955  | 23.81162 | 0.197384 | 0.760721 |
| 195.4443 | 1.88023  | 1.098213 | 456.4931 | 61.49596 | 23.81181 | 0.197386 | 0.760764 |
| 195.5056 | 1.880244 | 1.098221 | 456.5045 | 61.49642 | 23.81199 | 0.197387 | 0.760806 |
| 195.5669 | 1.880259 | 1.098229 | 456.5158 | 61.49688 | 23.81217 | 0.197389 | 0.760849 |
| 195.6282 | 1.880273 | 1.098237 | 456.5271 | 61.49734 | 23.81236 | 0.19739  | 0.760891 |
| 195.6895 | 1.880287 | 1.098246 | 456.5384 | 61.4978  | 23.81254 | 0.197392 | 0.760934 |
| 195.7508 | 1.880302 | 1.098254 | 456.5497 | 61.49826 | 23.81272 | 0.197393 | 0.760976 |

|          |          |          |          |          |          |          |          |
|----------|----------|----------|----------|----------|----------|----------|----------|
| 195.8121 | 1.880316 | 1.098262 | 456.561  | 61.49871 | 23.8129  | 0.197395 | 0.761018 |
| 195.8733 | 1.88033  | 1.09827  | 456.5723 | 61.49917 | 23.81308 | 0.197396 | 0.76106  |
| 195.9346 | 1.880345 | 1.098278 | 456.5836 | 61.49963 | 23.81327 | 0.197398 | 0.761103 |
| 195.9959 | 1.880359 | 1.098286 | 456.5948 | 61.50008 | 23.81345 | 0.197399 | 0.761145 |
| 196.0572 | 1.880373 | 1.098294 | 456.606  | 61.50054 | 23.81363 | 0.197401 | 0.761187 |
| 196.1185 | 1.880388 | 1.098303 | 456.6172 | 61.50099 | 23.81381 | 0.197402 | 0.761229 |
| 196.1798 | 1.880402 | 1.098311 | 456.6284 | 61.50145 | 23.81399 | 0.197403 | 0.761271 |
| 196.2411 | 1.880416 | 1.098319 | 456.6396 | 61.5019  | 23.81417 | 0.197405 | 0.761313 |
| 196.3023 | 1.88043  | 1.098327 | 456.6508 | 61.50235 | 23.81435 | 0.197406 | 0.761355 |
| 196.3636 | 1.880444 | 1.098335 | 456.662  | 61.5028  | 23.81453 | 0.197408 | 0.761397 |
| 196.4249 | 1.880459 | 1.098343 | 456.6731 | 61.50325 | 23.81471 | 0.197409 | 0.761439 |
| 196.4862 | 1.880473 | 1.098351 | 456.6842 | 61.50371 | 23.81489 | 0.197411 | 0.76148  |
| 196.5475 | 1.880487 | 1.098359 | 456.6954 | 61.50416 | 23.81507 | 0.197412 | 0.761522 |
| 196.6088 | 1.880501 | 1.098367 | 456.7065 | 61.50461 | 23.81525 | 0.197414 | 0.761564 |
| 196.6701 | 1.880515 | 1.098375 | 456.7176 | 61.50505 | 23.81543 | 0.197415 | 0.761606 |
| 196.7314 | 1.880529 | 1.098383 | 456.7286 | 61.5055  | 23.81561 | 0.197417 | 0.761647 |
| 196.7926 | 1.880543 | 1.098391 | 456.7397 | 61.50595 | 23.81579 | 0.197418 | 0.761689 |
| 196.8539 | 1.880557 | 1.098399 | 456.7507 | 61.5064  | 23.81597 | 0.197419 | 0.76173  |
| 196.9152 | 1.880571 | 1.098407 | 456.7618 | 61.50685 | 23.81614 | 0.197421 | 0.761772 |
| 196.9765 | 1.880585 | 1.098415 | 456.7728 | 61.50729 | 23.81632 | 0.197422 | 0.761814 |
| 197.0378 | 1.880599 | 1.098423 | 456.7838 | 61.50774 | 23.8165  | 0.197424 | 0.761855 |
| 197.0991 | 1.880613 | 1.098431 | 456.7948 | 61.50818 | 23.81668 | 0.197425 | 0.761896 |
| 197.1604 | 1.880627 | 1.098439 | 456.8058 | 61.50863 | 23.81685 | 0.197427 | 0.761938 |
| 197.2217 | 1.880641 | 1.098447 | 456.8168 | 61.50907 | 23.81703 | 0.197428 | 0.761979 |
| 197.2829 | 1.880655 | 1.098455 | 456.8277 | 61.50952 | 23.81721 | 0.197429 | 0.76202  |
| 197.3442 | 1.880669 | 1.098463 | 456.8386 | 61.50996 | 23.81738 | 0.197431 | 0.762062 |
| 197.4055 | 1.880683 | 1.098471 | 456.8496 | 61.5104  | 23.81756 | 0.197432 | 0.762103 |
| 197.4668 | 1.880697 | 1.098478 | 456.8605 | 61.51084 | 23.81774 | 0.197434 | 0.762144 |
| 197.5281 | 1.88071  | 1.098486 | 456.8714 | 61.51129 | 23.81791 | 0.197435 | 0.762185 |
| 197.5894 | 1.880724 | 1.098494 | 456.8823 | 61.51173 | 23.81809 | 0.197437 | 0.762226 |
| 197.6507 | 1.880738 | 1.098502 | 456.8931 | 61.51217 | 23.81826 | 0.197438 | 0.762267 |
| 197.712  | 1.880752 | 1.09851  | 456.904  | 61.51261 | 23.81844 | 0.197439 | 0.762308 |
| 197.7732 | 1.880766 | 1.098518 | 456.9148 | 61.51305 | 23.81862 | 0.197441 | 0.762349 |
| 197.8345 | 1.880779 | 1.098526 | 456.9257 | 61.51349 | 23.81879 | 0.197442 | 0.76239  |
| 197.8958 | 1.880793 | 1.098533 | 456.9365 | 61.51392 | 23.81896 | 0.197444 | 0.762431 |
| 197.9571 | 1.880807 | 1.098541 | 456.9473 | 61.51436 | 23.81914 | 0.197445 | 0.762472 |
| 198.0184 | 1.880821 | 1.098549 | 456.9581 | 61.5148  | 23.81931 | 0.197446 | 0.762513 |
| 198.0797 | 1.880834 | 1.098557 | 456.9689 | 61.51523 | 23.81949 | 0.197448 | 0.762554 |
| 198.141  | 1.880848 | 1.098565 | 456.9796 | 61.51567 | 23.81966 | 0.197449 | 0.762594 |
| 198.2022 | 1.880862 | 1.098572 | 456.9904 | 61.51611 | 23.81983 | 0.197451 | 0.762635 |
| 198.2635 | 1.880875 | 1.09858  | 457.0011 | 61.51654 | 23.82001 | 0.197452 | 0.762676 |
| 198.3248 | 1.880889 | 1.098588 | 457.0118 | 61.51698 | 23.82018 | 0.197453 | 0.762716 |
| 198.3861 | 1.880903 | 1.098596 | 457.0226 | 61.51741 | 23.82035 | 0.197455 | 0.762757 |
| 198.4474 | 1.880916 | 1.098603 | 457.0333 | 61.51784 | 23.82053 | 0.197456 | 0.762797 |
| 198.5087 | 1.88093  | 1.098611 | 457.0439 | 61.51828 | 23.8207  | 0.197458 | 0.762838 |
| 198.57   | 1.880943 | 1.098619 | 457.0546 | 61.51871 | 23.82087 | 0.197459 | 0.762878 |
| 198.6313 | 1.880957 | 1.098627 | 457.0653 | 61.51914 | 23.82104 | 0.19746  | 0.762919 |

|          |          |          |          |          |          |          |          |
|----------|----------|----------|----------|----------|----------|----------|----------|
| 198.6925 | 1.88097  | 1.098634 | 457.0759 | 61.51957 | 23.82122 | 0.197462 | 0.762959 |
| 198.7538 | 1.880984 | 1.098642 | 457.0865 | 61.52    | 23.82139 | 0.197463 | 0.762999 |
| 198.8151 | 1.880997 | 1.09865  | 457.0972 | 61.52043 | 23.82156 | 0.197464 | 0.76304  |
| 198.8764 | 1.881011 | 1.098657 | 457.1078 | 61.52086 | 23.82173 | 0.197466 | 0.76308  |
| 198.9377 | 1.881024 | 1.098665 | 457.1184 | 61.52129 | 23.8219  | 0.197467 | 0.76312  |
| 198.999  | 1.881038 | 1.098673 | 457.1289 | 61.52172 | 23.82207 | 0.197469 | 0.76316  |
| 199.0603 | 1.881051 | 1.09868  | 457.1395 | 61.52215 | 23.82224 | 0.19747  | 0.7632   |
| 199.1216 | 1.881065 | 1.098688 | 457.1501 | 61.52257 | 23.82241 | 0.197471 | 0.76324  |
| 199.1828 | 1.881078 | 1.098695 | 457.1606 | 61.523   | 23.82258 | 0.197473 | 0.763281 |
| 199.2441 | 1.881091 | 1.098703 | 457.1711 | 61.52343 | 23.82275 | 0.197474 | 0.763321 |
| 199.3054 | 1.881105 | 1.098711 | 457.1816 | 61.52385 | 23.82292 | 0.197475 | 0.763361 |
| 199.3667 | 1.881118 | 1.098718 | 457.1921 | 61.52428 | 23.82309 | 0.197477 | 0.7634   |
| 199.428  | 1.881131 | 1.098726 | 457.2026 | 61.5247  | 23.82326 | 0.197478 | 0.76344  |
| 199.4893 | 1.881145 | 1.098733 | 457.2131 | 61.52513 | 23.82343 | 0.19748  | 0.76348  |
| 199.5506 | 1.881158 | 1.098741 | 457.2236 | 61.52555 | 23.8236  | 0.197481 | 0.76352  |
| 199.6118 | 1.881171 | 1.098749 | 457.234  | 61.52598 | 23.82377 | 0.197482 | 0.76356  |
| 199.6731 | 1.881184 | 1.098756 | 457.2444 | 61.5264  | 23.82394 | 0.197484 | 0.7636   |
| 199.7344 | 1.881198 | 1.098764 | 457.2549 | 61.52682 | 23.8241  | 0.197485 | 0.763639 |
| 199.7957 | 1.881211 | 1.098771 | 457.2653 | 61.52724 | 23.82427 | 0.197486 | 0.763679 |
| 199.857  | 1.881224 | 1.098779 | 457.2757 | 61.52766 | 23.82444 | 0.197488 | 0.763719 |
| 199.9183 | 1.881237 | 1.098786 | 457.286  | 61.52808 | 23.82461 | 0.197489 | 0.763758 |
| 199.9796 | 1.881251 | 1.098794 | 457.2964 | 61.5285  | 23.82478 | 0.19749  | 0.763798 |
| 200.0409 | 1.881264 | 1.098801 | 457.3068 | 61.52892 | 23.82494 | 0.197492 | 0.763837 |
| 200.1021 | 1.881277 | 1.098809 | 457.3171 | 61.52934 | 23.82511 | 0.197493 | 0.763877 |
| 200.1634 | 1.88129  | 1.098816 | 457.3274 | 61.52976 | 23.82528 | 0.197494 | 0.763916 |
| 200.2247 | 1.881303 | 1.098824 | 457.3378 | 61.53018 | 23.82544 | 0.197496 | 0.763955 |
| 200.286  | 1.881316 | 1.098831 | 457.3481 | 61.5306  | 23.82561 | 0.197497 | 0.763995 |
| 200.3473 | 1.881329 | 1.098838 | 457.3584 | 61.53101 | 23.82578 | 0.197498 | 0.764034 |
| 200.4086 | 1.881342 | 1.098846 | 457.3686 | 61.53143 | 23.82594 | 0.1975   | 0.764073 |
| 200.4699 | 1.881355 | 1.098853 | 457.3789 | 61.53185 | 23.82611 | 0.197501 | 0.764113 |
| 200.5312 | 1.881368 | 1.098861 | 457.3892 | 61.53226 | 23.82627 | 0.197502 | 0.764152 |
| 200.5924 | 1.881381 | 1.098868 | 457.3994 | 61.53268 | 23.82644 | 0.197504 | 0.764191 |
| 200.6537 | 1.881394 | 1.098876 | 457.4096 | 61.53309 | 23.8266  | 0.197505 | 0.76423  |
| 200.715  | 1.881407 | 1.098883 | 457.4198 | 61.5335  | 23.82677 | 0.197506 | 0.764269 |
| 200.7763 | 1.88142  | 1.09889  | 457.4301 | 61.53392 | 23.82693 | 0.197508 | 0.764308 |
| 200.8376 | 1.881433 | 1.098898 | 457.4402 | 61.53433 | 23.8271  | 0.197509 | 0.764347 |
| 200.8989 | 1.881446 | 1.098905 | 457.4504 | 61.53474 | 23.82726 | 0.19751  | 0.764386 |
| 200.9602 | 1.881459 | 1.098912 | 457.4606 | 61.53515 | 23.82743 | 0.197512 | 0.764425 |
| 201.0215 | 1.881472 | 1.09892  | 457.4707 | 61.53557 | 23.82759 | 0.197513 | 0.764464 |
| 201.0827 | 1.881485 | 1.098927 | 457.4809 | 61.53598 | 23.82775 | 0.197514 | 0.764503 |
| 201.144  | 1.881498 | 1.098934 | 457.491  | 61.53639 | 23.82792 | 0.197516 | 0.764542 |
| 201.2053 | 1.881511 | 1.098942 | 457.5011 | 61.5368  | 23.82808 | 0.197517 | 0.76458  |
| 201.2666 | 1.881523 | 1.098949 | 457.5112 | 61.53721 | 23.82824 | 0.197518 | 0.764619 |
| 201.3279 | 1.881536 | 1.098956 | 457.5213 | 61.53761 | 23.82841 | 0.19752  | 0.764658 |
| 201.3892 | 1.881549 | 1.098964 | 457.5314 | 61.53802 | 23.82857 | 0.197521 | 0.764697 |
| 201.4505 | 1.881562 | 1.098971 | 457.5415 | 61.53843 | 23.82873 | 0.197522 | 0.764735 |
| 201.5117 | 1.881575 | 1.098978 | 457.5515 | 61.53884 | 23.82889 | 0.197524 | 0.764774 |

|          |          |          |          |          |          |          |          |
|----------|----------|----------|----------|----------|----------|----------|----------|
| 201.573  | 1.881587 | 1.098985 | 457.5615 | 61.53924 | 23.82906 | 0.197525 | 0.764812 |
| 201.6343 | 1.8816   | 1.098993 | 457.5716 | 61.53965 | 23.82922 | 0.197526 | 0.764851 |
| 201.6956 | 1.881613 | 1.099    | 457.5816 | 61.54006 | 23.82938 | 0.197528 | 0.764889 |
| 201.7569 | 1.881626 | 1.099007 | 457.5916 | 61.54046 | 23.82954 | 0.197529 | 0.764928 |
| 201.8182 | 1.881638 | 1.099014 | 457.6016 | 61.54087 | 23.8297  | 0.19753  | 0.764966 |
| 201.8795 | 1.881651 | 1.099022 | 457.6116 | 61.54127 | 23.82986 | 0.197531 | 0.765004 |
| 201.9408 | 1.881664 | 1.099029 | 457.6215 | 61.54167 | 23.83003 | 0.197533 | 0.765043 |
| 202.002  | 1.881676 | 1.099036 | 457.6315 | 61.54208 | 23.83019 | 0.197534 | 0.765081 |
| 202.0633 | 1.881689 | 1.099043 | 457.6414 | 61.54248 | 23.83035 | 0.197535 | 0.765119 |
| 202.1246 | 1.881702 | 1.09905  | 457.6513 | 61.54288 | 23.83051 | 0.197537 | 0.765158 |
| 202.1859 | 1.881714 | 1.099058 | 457.6613 | 61.54328 | 23.83067 | 0.197538 | 0.765196 |
| 202.2472 | 1.881727 | 1.099065 | 457.6712 | 61.54368 | 23.83083 | 0.197539 | 0.765234 |
| 202.3085 | 1.881739 | 1.099072 | 457.6811 | 61.54409 | 23.83099 | 0.19754  | 0.765272 |
| 202.3698 | 1.881752 | 1.099079 | 457.6909 | 61.54449 | 23.83115 | 0.197542 | 0.76531  |
| 202.4311 | 1.881764 | 1.099086 | 457.7008 | 61.54488 | 23.83131 | 0.197543 | 0.765348 |
| 202.4923 | 1.881777 | 1.099093 | 457.7107 | 61.54528 | 23.83146 | 0.197544 | 0.765386 |
| 202.5536 | 1.881789 | 1.0991   | 457.7205 | 61.54568 | 23.83162 | 0.197546 | 0.765424 |
| 202.6149 | 1.881802 | 1.099107 | 457.7303 | 61.54608 | 23.83178 | 0.197547 | 0.765462 |
| 202.6762 | 1.881814 | 1.099115 | 457.7401 | 61.54648 | 23.83194 | 0.197548 | 0.7655   |
| 202.7375 | 1.881827 | 1.099122 | 457.7499 | 61.54688 | 23.8321  | 0.197549 | 0.765538 |
| 202.7988 | 1.881839 | 1.099129 | 457.7597 | 61.54727 | 23.83226 | 0.197551 | 0.765575 |
| 202.8601 | 1.881852 | 1.099136 | 457.7695 | 61.54767 | 23.83241 | 0.197552 | 0.765613 |
| 202.9213 | 1.881864 | 1.099143 | 457.7793 | 61.54806 | 23.83257 | 0.197553 | 0.765651 |
| 202.9826 | 1.881876 | 1.09915  | 457.789  | 61.54846 | 23.83273 | 0.197555 | 0.765688 |
| 203.0439 | 1.881889 | 1.099157 | 457.7988 | 61.54885 | 23.83289 | 0.197556 | 0.765726 |
| 203.1052 | 1.881901 | 1.099164 | 457.8085 | 61.54925 | 23.83304 | 0.197557 | 0.765764 |
| 203.1665 | 1.881914 | 1.099171 | 457.8182 | 61.54964 | 23.8332  | 0.197558 | 0.765801 |
| 203.2278 | 1.881926 | 1.099178 | 457.8279 | 61.55004 | 23.83336 | 0.19756  | 0.765839 |
| 203.2891 | 1.881938 | 1.099185 | 457.8376 | 61.55043 | 23.83351 | 0.197561 | 0.765876 |
| 203.3504 | 1.881951 | 1.099192 | 457.8473 | 61.55082 | 23.83367 | 0.197562 | 0.765914 |
| 203.4116 | 1.881963 | 1.099199 | 457.857  | 61.55121 | 23.83383 | 0.197563 | 0.765951 |
| 203.4729 | 1.881975 | 1.099206 | 457.8667 | 61.5516  | 23.83398 | 0.197565 | 0.765989 |
| 203.5342 | 1.881987 | 1.099213 | 457.8763 | 61.552   | 23.83414 | 0.197566 | 0.766026 |
| 203.5955 | 1.882    | 1.09922  | 457.8859 | 61.55239 | 23.83429 | 0.197567 | 0.766063 |
| 203.6568 | 1.882012 | 1.099227 | 457.8956 | 61.55278 | 23.83445 | 0.197568 | 0.766101 |
| 203.7181 | 1.882024 | 1.099234 | 457.9052 | 61.55316 | 23.83461 | 0.19757  | 0.766138 |
| 203.7794 | 1.882036 | 1.099241 | 457.9148 | 61.55355 | 23.83476 | 0.197571 | 0.766175 |
| 203.8407 | 1.882048 | 1.099248 | 457.9244 | 61.55394 | 23.83492 | 0.197572 | 0.766212 |
| 203.9019 | 1.882061 | 1.099255 | 457.9339 | 61.55433 | 23.83507 | 0.197573 | 0.766249 |
| 203.9632 | 1.882073 | 1.099262 | 457.9435 | 61.55472 | 23.83522 | 0.197575 | 0.766286 |
| 204.0245 | 1.882085 | 1.099269 | 457.9531 | 61.5551  | 23.83538 | 0.197576 | 0.766323 |
| 204.0858 | 1.882097 | 1.099275 | 457.9626 | 61.55549 | 23.83553 | 0.197577 | 0.76636  |
| 204.1471 | 1.882109 | 1.099282 | 457.9721 | 61.55588 | 23.83569 | 0.197578 | 0.766397 |
| 204.2084 | 1.882121 | 1.099289 | 457.9816 | 61.55626 | 23.83584 | 0.19758  | 0.766434 |
| 204.2697 | 1.882133 | 1.099296 | 457.9912 | 61.55665 | 23.83599 | 0.197581 | 0.766471 |
| 204.3309 | 1.882145 | 1.099303 | 458.0006 | 61.55703 | 23.83615 | 0.197582 | 0.766508 |
| 204.3922 | 1.882157 | 1.09931  | 458.0101 | 61.55742 | 23.8363  | 0.197583 | 0.766545 |

|          |          |          |          |          |          |          |          |
|----------|----------|----------|----------|----------|----------|----------|----------|
| 204.4535 | 1.882169 | 1.099317 | 458.0196 | 61.5578  | 23.83645 | 0.197585 | 0.766582 |
| 204.5148 | 1.882181 | 1.099323 | 458.0291 | 61.55818 | 23.83661 | 0.197586 | 0.766619 |
| 204.5761 | 1.882193 | 1.09933  | 458.0385 | 61.55857 | 23.83676 | 0.197587 | 0.766655 |
| 204.6374 | 1.882205 | 1.099337 | 458.0479 | 61.55895 | 23.83691 | 0.197588 | 0.766692 |
| 204.6987 | 1.882217 | 1.099344 | 458.0574 | 61.55933 | 23.83706 | 0.197589 | 0.766729 |
| 204.76   | 1.882229 | 1.099351 | 458.0668 | 61.55971 | 23.83721 | 0.197591 | 0.766765 |
| 204.8212 | 1.882241 | 1.099358 | 458.0762 | 61.56009 | 23.83737 | 0.197592 | 0.766802 |
| 204.8825 | 1.882253 | 1.099364 | 458.0856 | 61.56047 | 23.83752 | 0.197593 | 0.766838 |
| 204.9438 | 1.882265 | 1.099371 | 458.0949 | 61.56085 | 23.83767 | 0.197594 | 0.766875 |
| 205.0051 | 1.882277 | 1.099378 | 458.1043 | 61.56123 | 23.83782 | 0.197596 | 0.766911 |
| 205.0664 | 1.882289 | 1.099385 | 458.1136 | 61.56161 | 23.83797 | 0.197597 | 0.766948 |
| 205.1277 | 1.882301 | 1.099391 | 458.123  | 61.56199 | 23.83812 | 0.197598 | 0.766984 |
| 205.189  | 1.882313 | 1.099398 | 458.1323 | 61.56237 | 23.83827 | 0.197599 | 0.767021 |
| 205.2503 | 1.882325 | 1.099405 | 458.1416 | 61.56274 | 23.83842 | 0.1976   | 0.767057 |
| 205.3115 | 1.882336 | 1.099412 | 458.1509 | 61.56312 | 23.83857 | 0.197602 | 0.767093 |
| 205.3728 | 1.882348 | 1.099418 | 458.1602 | 61.5635  | 23.83872 | 0.197603 | 0.767129 |
| 205.4341 | 1.88236  | 1.099425 | 458.1695 | 61.56387 | 23.83887 | 0.197604 | 0.767166 |
| 205.4954 | 1.882372 | 1.099432 | 458.1788 | 61.56425 | 23.83902 | 0.197605 | 0.767202 |
| 205.5567 | 1.882384 | 1.099438 | 458.1881 | 61.56462 | 23.83917 | 0.197606 | 0.767238 |
| 205.618  | 1.882395 | 1.099445 | 458.1973 | 61.565   | 23.83932 | 0.197608 | 0.767274 |
| 205.6793 | 1.882407 | 1.099452 | 458.2065 | 61.56537 | 23.83947 | 0.197609 | 0.76731  |
| 205.7406 | 1.882419 | 1.099459 | 458.2158 | 61.56575 | 23.83962 | 0.19761  | 0.767346 |
| 205.8018 | 1.88243  | 1.099465 | 458.225  | 61.56612 | 23.83977 | 0.197611 | 0.767382 |
| 205.8631 | 1.882442 | 1.099472 | 458.2342 | 61.56649 | 23.83992 | 0.197612 | 0.767418 |
| 205.9244 | 1.882454 | 1.099478 | 458.2434 | 61.56687 | 23.84007 | 0.197614 | 0.767454 |
| 205.9857 | 1.882465 | 1.099485 | 458.2526 | 61.56724 | 23.84021 | 0.197615 | 0.76749  |
| 206.047  | 1.882477 | 1.099492 | 458.2617 | 61.56761 | 23.84036 | 0.197616 | 0.767526 |
| 206.1083 | 1.882489 | 1.099498 | 458.2709 | 61.56798 | 23.84051 | 0.197617 | 0.767562 |
| 206.1696 | 1.8825   | 1.099505 | 458.28   | 61.56835 | 23.84066 | 0.197618 | 0.767598 |
| 206.2308 | 1.882512 | 1.099512 | 458.2892 | 61.56872 | 23.84081 | 0.19762  | 0.767633 |
| 206.2921 | 1.882524 | 1.099518 | 458.2983 | 61.56909 | 23.84095 | 0.197621 | 0.767669 |
| 206.3534 | 1.882535 | 1.099525 | 458.3074 | 61.56946 | 23.8411  | 0.197622 | 0.767705 |
| 206.4147 | 1.882547 | 1.099531 | 458.3165 | 61.56983 | 23.84125 | 0.197623 | 0.76774  |
| 206.476  | 1.882558 | 1.099538 | 458.3256 | 61.5702  | 23.84139 | 0.197624 | 0.767776 |
| 206.5373 | 1.88257  | 1.099545 | 458.3347 | 61.57056 | 23.84154 | 0.197626 | 0.767812 |
| 206.5986 | 1.882581 | 1.099551 | 458.3437 | 61.57093 | 23.84169 | 0.197627 | 0.767847 |
| 206.6599 | 1.882593 | 1.099558 | 458.3528 | 61.5713  | 23.84183 | 0.197628 | 0.767883 |
| 206.7211 | 1.882604 | 1.099564 | 458.3618 | 61.57166 | 23.84198 | 0.197629 | 0.767918 |
| 206.7824 | 1.882616 | 1.099571 | 458.3709 | 61.57203 | 23.84212 | 0.19763  | 0.767954 |
| 206.8437 | 1.882627 | 1.099577 | 458.3799 | 61.5724  | 23.84227 | 0.197631 | 0.767989 |
| 206.905  | 1.882639 | 1.099584 | 458.3889 | 61.57276 | 23.84242 | 0.197633 | 0.768024 |
| 206.9663 | 1.88265  | 1.09959  | 458.3979 | 61.57313 | 23.84256 | 0.197634 | 0.76806  |
| 207.0276 | 1.882662 | 1.099597 | 458.4069 | 61.57349 | 23.84271 | 0.197635 | 0.768095 |
| 207.0889 | 1.882673 | 1.099603 | 458.4159 | 61.57385 | 23.84285 | 0.197636 | 0.76813  |
| 207.1502 | 1.882684 | 1.09961  | 458.4248 | 61.57422 | 23.843   | 0.197637 | 0.768166 |
| 207.2114 | 1.882696 | 1.099616 | 458.4338 | 61.57458 | 23.84314 | 0.197638 | 0.768201 |
| 207.2727 | 1.882707 | 1.099623 | 458.4427 | 61.57494 | 23.84329 | 0.19764  | 0.768236 |



|          |          |          |          |          |          |          |          |
|----------|----------|----------|----------|----------|----------|----------|----------|
| 207.334  | 1.882719 | 1.099629 | 458.4517 | 61.5753  | 23.84343 | 0.197641 | 0.768271 |
| 207.3953 | 1.88273  | 1.099636 | 458.4606 | 61.57567 | 23.84357 | 0.197642 | 0.768306 |
| 207.4566 | 1.882741 | 1.099642 | 458.4695 | 61.57603 | 23.84372 | 0.197643 | 0.768341 |
| 207.5179 | 1.882752 | 1.099648 | 458.4784 | 61.57639 | 23.84386 | 0.197644 | 0.768376 |
| 207.5792 | 1.882764 | 1.099655 | 458.4873 | 61.57675 | 23.844   | 0.197645 | 0.768411 |
| 207.6404 | 1.882775 | 1.099661 | 458.4962 | 61.57711 | 23.84415 | 0.197647 | 0.768446 |
| 207.7017 | 1.882786 | 1.099668 | 458.505  | 61.57747 | 23.84429 | 0.197648 | 0.768481 |
| 207.763  | 1.882798 | 1.099674 | 458.5139 | 61.57782 | 23.84443 | 0.197649 | 0.768516 |
| 207.8243 | 1.882809 | 1.099681 | 458.5227 | 61.57818 | 23.84458 | 0.19765  | 0.768551 |
| 207.8856 | 1.88282  | 1.099687 | 458.5316 | 61.57854 | 23.84472 | 0.197651 | 0.768586 |
| 207.9469 | 1.882831 | 1.099693 | 458.5404 | 61.5789  | 23.84486 | 0.197652 | 0.768621 |
| 208.0082 | 1.882842 | 1.0997   | 458.5492 | 61.57926 | 23.845   | 0.197653 | 0.768655 |
| 208.0695 | 1.882854 | 1.099706 | 458.558  | 61.57961 | 23.84515 | 0.197655 | 0.76869  |
| 208.1307 | 1.882865 | 1.099712 | 458.5668 | 61.57997 | 23.84529 | 0.197656 | 0.768725 |
| 208.192  | 1.882876 | 1.099719 | 458.5756 | 61.58032 | 23.84543 | 0.197657 | 0.768759 |
| 208.2533 | 1.882887 | 1.099725 | 458.5843 | 61.58068 | 23.84557 | 0.197658 | 0.768794 |
| 208.3146 | 1.882898 | 1.099731 | 458.5931 | 61.58103 | 23.84571 | 0.197659 | 0.768829 |
| 208.3759 | 1.882909 | 1.099738 | 458.6018 | 61.58139 | 23.84585 | 0.19766  | 0.768863 |
| 208.4372 | 1.88292  | 1.099744 | 458.6106 | 61.58174 | 23.846   | 0.197661 | 0.768898 |
| 208.4985 | 1.882932 | 1.09975  | 458.6193 | 61.5821  | 23.84614 | 0.197663 | 0.768932 |
| 208.5598 | 1.882943 | 1.099757 | 458.628  | 61.58245 | 23.84628 | 0.197664 | 0.768967 |
| 208.621  | 1.882954 | 1.099763 | 458.6367 | 61.5828  | 23.84642 | 0.197665 | 0.769001 |
| 208.6823 | 1.882965 | 1.099769 | 458.6454 | 61.58315 | 23.84656 | 0.197666 | 0.769035 |
| 208.7436 | 1.882976 | 1.099776 | 458.6541 | 61.58351 | 23.8467  | 0.197667 | 0.76907  |
| 208.8049 | 1.882987 | 1.099782 | 458.6628 | 61.58386 | 23.84684 | 0.197668 | 0.769104 |
| 208.8662 | 1.882998 | 1.099788 | 458.6714 | 61.58421 | 23.84698 | 0.197669 | 0.769138 |
| 208.9275 | 1.883009 | 1.099794 | 458.6801 | 61.58456 | 23.84712 | 0.197671 | 0.769173 |
| 208.9888 | 1.88302  | 1.099801 | 458.6887 | 61.58491 | 23.84726 | 0.197672 | 0.769207 |
| 209.0501 | 1.883031 | 1.099807 | 458.6973 | 61.58526 | 23.8474  | 0.197673 | 0.769241 |
| 209.1113 | 1.883042 | 1.099813 | 458.706  | 61.58561 | 23.84754 | 0.197674 | 0.769275 |
| 209.1726 | 1.883053 | 1.099819 | 458.7146 | 61.58596 | 23.84768 | 0.197675 | 0.769309 |
| 209.2339 | 1.883064 | 1.099825 | 458.7232 | 61.5863  | 23.84781 | 0.197676 | 0.769343 |
| 209.2952 | 1.883074 | 1.099832 | 458.7318 | 61.58665 | 23.84795 | 0.197677 | 0.769377 |
| 209.3565 | 1.883085 | 1.099838 | 458.7403 | 61.587   | 23.84809 | 0.197678 | 0.769411 |
| 209.4178 | 1.883096 | 1.099844 | 458.7489 | 61.58735 | 23.84823 | 0.197679 | 0.769445 |
| 209.4791 | 1.883107 | 1.09985  | 458.7574 | 61.58769 | 23.84837 | 0.197681 | 0.769479 |
| 209.5403 | 1.883118 | 1.099856 | 458.766  | 61.58804 | 23.84851 | 0.197682 | 0.769513 |
| 209.6016 | 1.883129 | 1.099863 | 458.7745 | 61.58838 | 23.84864 | 0.197683 | 0.769547 |
| 209.6629 | 1.88314  | 1.099869 | 458.783  | 61.58873 | 23.84878 | 0.197684 | 0.769581 |
| 209.7242 | 1.88315  | 1.099875 | 458.7916 | 61.58907 | 23.84892 | 0.197685 | 0.769615 |
| 209.7855 | 1.883161 | 1.099881 | 458.8001 | 61.58942 | 23.84906 | 0.197686 | 0.769648 |
| 209.8468 | 1.883172 | 1.099887 | 458.8085 | 61.58976 | 23.84919 | 0.197687 | 0.769682 |
| 209.9081 | 1.883183 | 1.099893 | 458.817  | 61.59011 | 23.84933 | 0.197688 | 0.769716 |
| 209.9694 | 1.883194 | 1.0999   | 458.8255 | 61.59045 | 23.84947 | 0.197689 | 0.769749 |
| 210.0306 | 1.883204 | 1.099906 | 458.834  | 61.59079 | 23.8496  | 0.197691 | 0.769783 |
| 210.0919 | 1.883215 | 1.099912 | 458.8424 | 61.59113 | 23.84974 | 0.197692 | 0.769817 |
| 210.1532 | 1.883226 | 1.099918 | 458.8508 | 61.59148 | 23.84988 | 0.197693 | 0.76985  |

|          |          |          |          |          |          |          |          |
|----------|----------|----------|----------|----------|----------|----------|----------|
| 210.2145 | 1.883237 | 1.099924 | 458.8593 | 61.59182 | 23.85001 | 0.197694 | 0.769884 |
| 210.2758 | 1.883247 | 1.09993  | 458.8677 | 61.59216 | 23.85015 | 0.197695 | 0.769917 |
| 210.3371 | 1.883258 | 1.099936 | 458.8761 | 61.5925  | 23.85028 | 0.197696 | 0.769951 |
| 210.3984 | 1.883269 | 1.099942 | 458.8845 | 61.59284 | 23.85042 | 0.197697 | 0.769984 |
| 210.4597 | 1.883279 | 1.099948 | 458.8929 | 61.59318 | 23.85055 | 0.197698 | 0.770018 |
| 210.5209 | 1.88329  | 1.099954 | 458.9013 | 61.59352 | 23.85069 | 0.197699 | 0.770051 |
| 210.5822 | 1.8833   | 1.09996  | 458.9096 | 61.59386 | 23.85082 | 0.1977   | 0.770084 |
| 210.6435 | 1.883311 | 1.099966 | 458.918  | 61.5942  | 23.85096 | 0.197701 | 0.770118 |
| 210.7048 | 1.883322 | 1.099972 | 458.9263 | 61.59453 | 23.85109 | 0.197703 | 0.770151 |
| 210.7661 | 1.883332 | 1.099978 | 458.9347 | 61.59487 | 23.85123 | 0.197704 | 0.770184 |
| 210.8274 | 1.883343 | 1.099984 | 458.943  | 61.59521 | 23.85136 | 0.197705 | 0.770217 |
| 210.8887 | 1.883353 | 1.09999  | 458.9513 | 61.59555 | 23.8515  | 0.197706 | 0.770251 |
| 210.9499 | 1.883364 | 1.099996 | 458.9596 | 61.59588 | 23.85163 | 0.197707 | 0.770284 |
| 211.0112 | 1.883375 | 1.100002 | 458.9679 | 61.59622 | 23.85177 | 0.197708 | 0.770317 |
| 211.0725 | 1.883385 | 1.100008 | 458.9762 | 61.59655 | 23.8519  | 0.197709 | 0.77035  |
| 211.1338 | 1.883396 | 1.100014 | 458.9845 | 61.59689 | 23.85203 | 0.19771  | 0.770383 |
| 211.1951 | 1.883406 | 1.10002  | 458.9927 | 61.59722 | 23.85217 | 0.197711 | 0.770416 |
| 211.2564 | 1.883417 | 1.100026 | 459.001  | 61.59756 | 23.8523  | 0.197712 | 0.770449 |
| 211.3177 | 1.883427 | 1.100032 | 459.0092 | 61.59789 | 23.85243 | 0.197713 | 0.770482 |
| 211.379  | 1.883437 | 1.100038 | 459.0174 | 61.59823 | 23.85257 | 0.197714 | 0.770515 |
| 211.4402 | 1.883448 | 1.100044 | 459.0256 | 61.59856 | 23.8527  | 0.197716 | 0.770548 |
| 211.5015 | 1.883458 | 1.10005  | 459.0338 | 61.59889 | 23.85283 | 0.197717 | 0.77058  |
| 211.5628 | 1.883469 | 1.100056 | 459.042  | 61.59922 | 23.85296 | 0.197718 | 0.770613 |
| 211.6241 | 1.883479 | 1.100062 | 459.0502 | 61.59955 | 23.8531  | 0.197719 | 0.770646 |
| 211.6854 | 1.88349  | 1.100068 | 459.0584 | 61.59988 | 23.85323 | 0.19772  | 0.770679 |
| 211.7467 | 1.8835   | 1.100074 | 459.0665 | 61.60021 | 23.85336 | 0.197721 | 0.770712 |
| 211.808  | 1.88351  | 1.10008  | 459.0747 | 61.60054 | 23.85349 | 0.197722 | 0.770744 |
| 211.8693 | 1.883521 | 1.100086 | 459.0828 | 61.60087 | 23.85362 | 0.197723 | 0.770777 |
| 211.9305 | 1.883531 | 1.100091 | 459.0909 | 61.6012  | 23.85375 | 0.197724 | 0.77081  |
| 211.9918 | 1.883541 | 1.100097 | 459.0991 | 61.60153 | 23.85388 | 0.197725 | 0.770842 |
| 212.0531 | 1.883552 | 1.100103 | 459.1072 | 61.60186 | 23.85401 | 0.197726 | 0.770875 |
| 212.1144 | 1.883562 | 1.100109 | 459.1153 | 61.60219 | 23.85415 | 0.197727 | 0.770907 |
| 212.1757 | 1.883572 | 1.100115 | 459.1233 | 61.60252 | 23.85428 | 0.197728 | 0.77094  |
| 212.237  | 1.883582 | 1.100121 | 459.1314 | 61.60284 | 23.85441 | 0.197729 | 0.770972 |
| 212.2983 | 1.883593 | 1.100127 | 459.1395 | 61.60317 | 23.85454 | 0.19773  | 0.771005 |
| 212.3596 | 1.883603 | 1.100132 | 459.1475 | 61.6035  | 23.85467 | 0.197731 | 0.771037 |
| 212.4208 | 1.883613 | 1.100138 | 459.1556 | 61.60382 | 23.8548  | 0.197732 | 0.771069 |
| 212.4821 | 1.883623 | 1.100144 | 459.1636 | 61.60415 | 23.85493 | 0.197733 | 0.771102 |
| 212.5434 | 1.883633 | 1.10015  | 459.1716 | 61.60447 | 23.85506 | 0.197735 | 0.771134 |
| 212.6047 | 1.883644 | 1.100156 | 459.1796 | 61.6048  | 23.85519 | 0.197736 | 0.771166 |
| 212.666  | 1.883654 | 1.100161 | 459.1877 | 61.60512 | 23.85531 | 0.197737 | 0.771198 |
| 212.7273 | 1.883664 | 1.100167 | 459.1956 | 61.60545 | 23.85544 | 0.197738 | 0.771231 |
| 212.7886 | 1.883674 | 1.100173 | 459.2036 | 61.60577 | 23.85557 | 0.197739 | 0.771263 |
| 212.8498 | 1.883684 | 1.100179 | 459.2116 | 61.60609 | 23.8557  | 0.19774  | 0.771295 |
| 212.9111 | 1.883694 | 1.100185 | 459.2196 | 61.60642 | 23.85583 | 0.197741 | 0.771327 |
| 212.9724 | 1.883705 | 1.10019  | 459.2275 | 61.60674 | 23.85596 | 0.197742 | 0.771359 |
| 213.0337 | 1.883715 | 1.100196 | 459.2355 | 61.60706 | 23.85609 | 0.197743 | 0.771391 |

|          |          |          |          |          |          |          |          |
|----------|----------|----------|----------|----------|----------|----------|----------|
| 213.095  | 1.883725 | 1.100202 | 459.2434 | 61.60738 | 23.85622 | 0.197744 | 0.771423 |
| 213.1563 | 1.883735 | 1.100207 | 459.2513 | 61.6077  | 23.85634 | 0.197745 | 0.771455 |
| 213.2176 | 1.883745 | 1.100213 | 459.2592 | 61.60802 | 23.85647 | 0.197746 | 0.771487 |
| 213.2789 | 1.883755 | 1.100219 | 459.2671 | 61.60834 | 23.8566  | 0.197747 | 0.771519 |
| 213.3401 | 1.883765 | 1.100225 | 459.275  | 61.60866 | 23.85673 | 0.197748 | 0.771551 |
| 213.4014 | 1.883775 | 1.10023  | 459.2829 | 61.60898 | 23.85685 | 0.197749 | 0.771583 |
| 213.4627 | 1.883785 | 1.100236 | 459.2908 | 61.6093  | 23.85698 | 0.19775  | 0.771615 |
| 213.524  | 1.883795 | 1.100242 | 459.2986 | 61.60962 | 23.85711 | 0.197751 | 0.771646 |
| 213.5853 | 1.883805 | 1.100247 | 459.3065 | 61.60994 | 23.85723 | 0.197752 | 0.771678 |
| 213.6466 | 1.883815 | 1.100253 | 459.3143 | 61.61026 | 23.85736 | 0.197753 | 0.77171  |
| 213.7079 | 1.883825 | 1.100259 | 459.3222 | 61.61057 | 23.85749 | 0.197754 | 0.771742 |
| 213.7692 | 1.883835 | 1.100264 | 459.33   | 61.61089 | 23.85761 | 0.197755 | 0.771773 |
| 213.8304 | 1.883845 | 1.10027  | 459.3378 | 61.61121 | 23.85774 | 0.197756 | 0.771805 |
| 213.8917 | 1.883855 | 1.100276 | 459.3456 | 61.61152 | 23.85787 | 0.197757 | 0.771836 |
| 213.953  | 1.883865 | 1.100281 | 459.3534 | 61.61184 | 23.85799 | 0.197758 | 0.771868 |
| 214.0143 | 1.883874 | 1.100287 | 459.3612 | 61.61215 | 23.85812 | 0.197759 | 0.7719   |
| 214.0756 | 1.883884 | 1.100293 | 459.369  | 61.61247 | 23.85824 | 0.19776  | 0.771931 |
| 214.1369 | 1.883894 | 1.100298 | 459.3767 | 61.61278 | 23.85837 | 0.197761 | 0.771963 |
| 214.1982 | 1.883904 | 1.100304 | 459.3845 | 61.6131  | 23.85849 | 0.197762 | 0.771994 |
| 214.2594 | 1.883914 | 1.100309 | 459.3922 | 61.61341 | 23.85862 | 0.197763 | 0.772025 |
| 214.3207 | 1.883924 | 1.100315 | 459.4    | 61.61372 | 23.85874 | 0.197764 | 0.772057 |
| 214.382  | 1.883934 | 1.100321 | 459.4077 | 61.61404 | 23.85887 | 0.197765 | 0.772088 |
| 214.4433 | 1.883943 | 1.100326 | 459.4154 | 61.61435 | 23.85899 | 0.197766 | 0.772119 |
| 214.5046 | 1.883953 | 1.100332 | 459.4231 | 61.61466 | 23.85912 | 0.197767 | 0.772151 |
| 214.5659 | 1.883963 | 1.100337 | 459.4308 | 61.61497 | 23.85924 | 0.197768 | 0.772182 |
| 214.6272 | 1.883973 | 1.100343 | 459.4385 | 61.61529 | 23.85937 | 0.197769 | 0.772213 |
| 214.6885 | 1.883982 | 1.100348 | 459.4462 | 61.6156  | 23.85949 | 0.19777  | 0.772244 |
| 214.7497 | 1.883992 | 1.100354 | 459.4538 | 61.61591 | 23.85961 | 0.197771 | 0.772276 |
| 214.811  | 1.884002 | 1.10036  | 459.4615 | 61.61622 | 23.85974 | 0.197772 | 0.772307 |
| 214.8723 | 1.884012 | 1.100365 | 459.4691 | 61.61653 | 23.85986 | 0.197773 | 0.772338 |
| 214.9336 | 1.884021 | 1.100371 | 459.4768 | 61.61684 | 23.85998 | 0.197774 | 0.772369 |
| 214.9949 | 1.884031 | 1.100376 | 459.4844 | 61.61715 | 23.86011 | 0.197775 | 0.7724   |
| 215.0562 | 1.884041 | 1.100382 | 459.492  | 61.61745 | 23.86023 | 0.197776 | 0.772431 |
| 215.1175 | 1.88405  | 1.100387 | 459.4996 | 61.61776 | 23.86035 | 0.197777 | 0.772462 |
| 215.1788 | 1.88406  | 1.100393 | 459.5072 | 61.61807 | 23.86048 | 0.197778 | 0.772493 |
| 215.24   | 1.88407  | 1.100398 | 459.5148 | 61.61838 | 23.8606  | 0.197779 | 0.772524 |
| 215.3013 | 1.884079 | 1.100404 | 459.5224 | 61.61869 | 23.86072 | 0.19778  | 0.772555 |
| 215.3626 | 1.884089 | 1.100409 | 459.53   | 61.61899 | 23.86084 | 0.197781 | 0.772585 |
| 215.4239 | 1.884099 | 1.100415 | 459.5375 | 61.6193  | 23.86097 | 0.197782 | 0.772616 |
| 215.4852 | 1.884108 | 1.10042  | 459.5451 | 61.6196  | 23.86109 | 0.197783 | 0.772647 |
| 215.5465 | 1.884118 | 1.100425 | 459.5526 | 61.61991 | 23.86121 | 0.197784 | 0.772678 |
| 215.6078 | 1.884127 | 1.100431 | 459.5601 | 61.62022 | 23.86133 | 0.197785 | 0.772709 |
| 215.6691 | 1.884137 | 1.100436 | 459.5677 | 61.62052 | 23.86145 | 0.197786 | 0.772739 |
| 215.7303 | 1.884146 | 1.100442 | 459.5752 | 61.62082 | 23.86157 | 0.197787 | 0.77277  |
| 215.7916 | 1.884156 | 1.100447 | 459.5827 | 61.62113 | 23.8617  | 0.197788 | 0.772801 |
| 215.8529 | 1.884165 | 1.100453 | 459.5902 | 61.62143 | 23.86182 | 0.197789 | 0.772831 |
| 215.9142 | 1.884175 | 1.100458 | 459.5977 | 61.62174 | 23.86194 | 0.19779  | 0.772862 |

|          |          |          |          |          |          |          |          |
|----------|----------|----------|----------|----------|----------|----------|----------|
| 215.9755 | 1.884184 | 1.100463 | 459.6051 | 61.62204 | 23.86206 | 0.197791 | 0.772892 |
| 216.0368 | 1.884194 | 1.100469 | 459.6126 | 61.62234 | 23.86218 | 0.197792 | 0.772923 |
| 216.0981 | 1.884203 | 1.100474 | 459.6201 | 61.62264 | 23.8623  | 0.197793 | 0.772953 |
| 216.1593 | 1.884213 | 1.10048  | 459.6275 | 61.62294 | 23.86242 | 0.197794 | 0.772984 |
| 216.2206 | 1.884222 | 1.100485 | 459.6349 | 61.62325 | 23.86254 | 0.197795 | 0.773014 |
| 216.2819 | 1.884232 | 1.10049  | 459.6424 | 61.62355 | 23.86266 | 0.197796 | 0.773045 |
| 216.3432 | 1.884241 | 1.100496 | 459.6498 | 61.62385 | 23.86278 | 0.197797 | 0.773075 |
| 216.4045 | 1.884251 | 1.100501 | 459.6572 | 61.62415 | 23.8629  | 0.197798 | 0.773105 |
| 216.4658 | 1.88426  | 1.100506 | 459.6646 | 61.62445 | 23.86302 | 0.197799 | 0.773136 |
| 216.5271 | 1.884269 | 1.100512 | 459.672  | 61.62475 | 23.86314 | 0.1978   | 0.773166 |
| 216.5884 | 1.884279 | 1.100517 | 459.6794 | 61.62505 | 23.86326 | 0.197801 | 0.773196 |
| 216.6496 | 1.884288 | 1.100522 | 459.6867 | 61.62534 | 23.86338 | 0.197802 | 0.773226 |
| 216.7109 | 1.884298 | 1.100528 | 459.6941 | 61.62564 | 23.8635  | 0.197803 | 0.773257 |
| 216.7722 | 1.884307 | 1.100533 | 459.7014 | 61.62594 | 23.86361 | 0.197803 | 0.773287 |
| 216.8335 | 1.884316 | 1.100538 | 459.7088 | 61.62624 | 23.86373 | 0.197804 | 0.773317 |
| 216.8948 | 1.884326 | 1.100544 | 459.7161 | 61.62654 | 23.86385 | 0.197805 | 0.773347 |
| 216.9561 | 1.884335 | 1.100549 | 459.7234 | 61.62683 | 23.86397 | 0.197806 | 0.773377 |
| 217.0174 | 1.884344 | 1.100554 | 459.7308 | 61.62713 | 23.86409 | 0.197807 | 0.773407 |
| 217.0787 | 1.884353 | 1.10056  | 459.7381 | 61.62742 | 23.86421 | 0.197808 | 0.773437 |
| 217.1399 | 1.884363 | 1.100565 | 459.7454 | 61.62772 | 23.86432 | 0.197809 | 0.773467 |
| 217.2012 | 1.884372 | 1.10057  | 459.7526 | 61.62802 | 23.86444 | 0.19781  | 0.773497 |
| 217.2625 | 1.884381 | 1.100575 | 459.7599 | 61.62831 | 23.86456 | 0.197811 | 0.773527 |
| 217.3238 | 1.88439  | 1.100581 | 459.7672 | 61.62861 | 23.86468 | 0.197812 | 0.773557 |
| 217.3851 | 1.8844   | 1.100586 | 459.7744 | 61.6289  | 23.86479 | 0.197813 | 0.773587 |
| 217.4464 | 1.884409 | 1.100591 | 459.7817 | 61.62919 | 23.86491 | 0.197814 | 0.773617 |
| 217.5077 | 1.884418 | 1.100596 | 459.7889 | 61.62949 | 23.86503 | 0.197815 | 0.773646 |
| 217.5689 | 1.884427 | 1.100602 | 459.7962 | 61.62978 | 23.86514 | 0.197816 | 0.773676 |
| 217.6302 | 1.884437 | 1.100607 | 459.8034 | 61.63007 | 23.86526 | 0.197817 | 0.773706 |
| 217.6915 | 1.884446 | 1.100612 | 459.8106 | 61.63036 | 23.86538 | 0.197818 | 0.773736 |
| 217.7528 | 1.884455 | 1.100617 | 459.8178 | 61.63066 | 23.86549 | 0.197819 | 0.773765 |
| 217.8141 | 1.884464 | 1.100622 | 459.825  | 61.63095 | 23.86561 | 0.19782  | 0.773795 |
| 217.8754 | 1.884473 | 1.100628 | 459.8322 | 61.63124 | 23.86573 | 0.197821 | 0.773825 |
| 217.9367 | 1.884482 | 1.100633 | 459.8394 | 61.63153 | 23.86584 | 0.197821 | 0.773854 |
| 217.998  | 1.884491 | 1.100638 | 459.8465 | 61.63182 | 23.86596 | 0.197822 | 0.773884 |
| 218.0592 | 1.8845   | 1.100643 | 459.8537 | 61.63211 | 23.86607 | 0.197823 | 0.773913 |
| 218.1205 | 1.88451  | 1.100648 | 459.8608 | 61.6324  | 23.86619 | 0.197824 | 0.773943 |
| 218.1818 | 1.884519 | 1.100654 | 459.868  | 61.63269 | 23.8663  | 0.197825 | 0.773972 |
| 218.2431 | 1.884528 | 1.100659 | 459.8751 | 61.63298 | 23.86642 | 0.197826 | 0.774002 |
| 218.3044 | 1.884537 | 1.100664 | 459.8822 | 61.63327 | 23.86653 | 0.197827 | 0.774031 |
| 218.3657 | 1.884546 | 1.100669 | 459.8894 | 61.63356 | 23.86665 | 0.197828 | 0.77406  |
| 218.427  | 1.884555 | 1.100674 | 459.8965 | 61.63384 | 23.86676 | 0.197829 | 0.77409  |
| 218.4883 | 1.884564 | 1.100679 | 459.9036 | 61.63413 | 23.86688 | 0.19783  | 0.774119 |
| 218.5495 | 1.884573 | 1.100684 | 459.9106 | 61.63442 | 23.86699 | 0.197831 | 0.774148 |
| 218.6108 | 1.884582 | 1.10069  | 459.9177 | 61.6347  | 23.86711 | 0.197832 | 0.774178 |
| 218.6721 | 1.884591 | 1.100695 | 459.9248 | 61.63499 | 23.86722 | 0.197833 | 0.774207 |
| 218.7334 | 1.8846   | 1.1007   | 459.9318 | 61.63528 | 23.86734 | 0.197833 | 0.774236 |
| 218.7947 | 1.884609 | 1.100705 | 459.9389 | 61.63556 | 23.86745 | 0.197834 | 0.774265 |

|          |          |          |          |          |          |          |          |
|----------|----------|----------|----------|----------|----------|----------|----------|
| 218.856  | 1.884618 | 1.10071  | 459.9459 | 61.63585 | 23.86756 | 0.197835 | 0.774295 |
| 218.9173 | 1.884627 | 1.100715 | 459.953  | 61.63613 | 23.86768 | 0.197836 | 0.774324 |
| 218.9785 | 1.884636 | 1.10072  | 459.96   | 61.63642 | 23.86779 | 0.197837 | 0.774353 |
| 219.0398 | 1.884645 | 1.100725 | 459.967  | 61.6367  | 23.8679  | 0.197838 | 0.774382 |
| 219.1011 | 1.884653 | 1.10073  | 459.974  | 61.63699 | 23.86802 | 0.197839 | 0.774411 |
| 219.1624 | 1.884662 | 1.100735 | 459.981  | 61.63727 | 23.86813 | 0.19784  | 0.77444  |
| 219.2237 | 1.884671 | 1.10074  | 459.988  | 61.63755 | 23.86824 | 0.197841 | 0.774469 |
| 219.285  | 1.88468  | 1.100745 | 459.995  | 61.63784 | 23.86836 | 0.197842 | 0.774498 |
| 219.3463 | 1.884689 | 1.10075  | 460.002  | 61.63812 | 23.86847 | 0.197843 | 0.774527 |
| 219.4076 | 1.884698 | 1.100756 | 460.0089 | 61.6384  | 23.86858 | 0.197844 | 0.774556 |
| 219.4688 | 1.884707 | 1.100761 | 460.0159 | 61.63868 | 23.86869 | 0.197844 | 0.774584 |
| 219.5301 | 1.884715 | 1.100766 | 460.0228 | 61.63896 | 23.86881 | 0.197845 | 0.774613 |
| 219.5914 | 1.884724 | 1.100771 | 460.0297 | 61.63924 | 23.86892 | 0.197846 | 0.774642 |
| 219.6527 | 1.884733 | 1.100776 | 460.0367 | 61.63953 | 23.86903 | 0.197847 | 0.774671 |
| 219.714  | 1.884742 | 1.100781 | 460.0436 | 61.63981 | 23.86914 | 0.197848 | 0.7747   |
| 219.7753 | 1.884751 | 1.100786 | 460.0505 | 61.64009 | 23.86925 | 0.197849 | 0.774728 |
| 219.8366 | 1.884759 | 1.100791 | 460.0574 | 61.64037 | 23.86936 | 0.19785  | 0.774757 |
| 219.8979 | 1.884768 | 1.100796 | 460.0643 | 61.64064 | 23.86948 | 0.197851 | 0.774786 |
| 219.9591 | 1.884777 | 1.100801 | 460.0712 | 61.64092 | 23.86959 | 0.197852 | 0.774814 |
| 220.0204 | 1.884786 | 1.100806 | 460.0781 | 61.6412  | 23.8697  | 0.197853 | 0.774843 |
| 220.0817 | 1.884794 | 1.10081  | 460.0849 | 61.64148 | 23.86981 | 0.197853 | 0.774872 |
| 220.143  | 1.884803 | 1.100815 | 460.0918 | 61.64176 | 23.86992 | 0.197854 | 0.7749   |
| 220.2043 | 1.884812 | 1.10082  | 460.0986 | 61.64204 | 23.87003 | 0.197855 | 0.774929 |
| 220.2656 | 1.884821 | 1.100825 | 460.1055 | 61.64231 | 23.87014 | 0.197856 | 0.774957 |
| 220.3269 | 1.884829 | 1.10083  | 460.1123 | 61.64259 | 23.87025 | 0.197857 | 0.774986 |
| 220.3882 | 1.884838 | 1.100835 | 460.1191 | 61.64287 | 23.87036 | 0.197858 | 0.775014 |
| 220.4494 | 1.884847 | 1.10084  | 460.1259 | 61.64314 | 23.87047 | 0.197859 | 0.775042 |
| 220.5107 | 1.884855 | 1.100845 | 460.1327 | 61.64342 | 23.87058 | 0.19786  | 0.775071 |
| 220.572  | 1.884864 | 1.10085  | 460.1395 | 61.64369 | 23.87069 | 0.197861 | 0.775099 |
| 220.6333 | 1.884872 | 1.100855 | 460.1463 | 61.64397 | 23.8708  | 0.197861 | 0.775127 |
| 220.6946 | 1.884881 | 1.10086  | 460.1531 | 61.64424 | 23.87091 | 0.197862 | 0.775156 |
| 220.7559 | 1.88489  | 1.100865 | 460.1599 | 61.64452 | 23.87102 | 0.197863 | 0.775184 |
| 220.8172 | 1.884898 | 1.10087  | 460.1666 | 61.64479 | 23.87113 | 0.197864 | 0.775212 |
| 220.8784 | 1.884907 | 1.100874 | 460.1734 | 61.64507 | 23.87124 | 0.197865 | 0.775241 |
| 220.9397 | 1.884915 | 1.100879 | 460.1801 | 61.64534 | 23.87135 | 0.197866 | 0.775269 |
| 221.001  | 1.884924 | 1.100884 | 460.1869 | 61.64561 | 23.87146 | 0.197867 | 0.775297 |
| 221.0623 | 1.884933 | 1.100889 | 460.1936 | 61.64588 | 23.87156 | 0.197868 | 0.775325 |
| 221.1236 | 1.884941 | 1.100894 | 460.2003 | 61.64616 | 23.87167 | 0.197868 | 0.775353 |
| 221.1849 | 1.88495  | 1.100899 | 460.207  | 61.64643 | 23.87178 | 0.197869 | 0.775381 |
| 221.2462 | 1.884958 | 1.100904 | 460.2137 | 61.6467  | 23.87189 | 0.19787  | 0.775409 |
| 221.3075 | 1.884967 | 1.100909 | 460.2204 | 61.64697 | 23.872   | 0.197871 | 0.775437 |
| 221.3687 | 1.884975 | 1.100913 | 460.2271 | 61.64724 | 23.87211 | 0.197872 | 0.775465 |
| 221.43   | 1.884984 | 1.100918 | 460.2338 | 61.64751 | 23.87221 | 0.197873 | 0.775493 |
| 221.4913 | 1.884992 | 1.100923 | 460.2405 | 61.64778 | 23.87232 | 0.197874 | 0.775521 |
| 221.5526 | 1.885001 | 1.100928 | 460.2471 | 61.64805 | 23.87243 | 0.197875 | 0.775549 |
| 221.6139 | 1.885009 | 1.100933 | 460.2538 | 61.64832 | 23.87254 | 0.197875 | 0.775577 |
| 221.6752 | 1.885018 | 1.100937 | 460.2604 | 61.64859 | 23.87264 | 0.197876 | 0.775605 |

|          |          |          |          |          |          |          |          |
|----------|----------|----------|----------|----------|----------|----------|----------|
| 221.7365 | 1.885026 | 1.100942 | 460.267  | 61.64886 | 23.87275 | 0.197877 | 0.775633 |
| 221.7978 | 1.885034 | 1.100947 | 460.2737 | 61.64913 | 23.87286 | 0.197878 | 0.77566  |
| 221.859  | 1.885043 | 1.100952 | 460.2803 | 61.6494  | 23.87296 | 0.197879 | 0.775688 |
| 221.9203 | 1.885051 | 1.100957 | 460.2869 | 61.64967 | 23.87307 | 0.19788  | 0.775716 |
| 221.9816 | 1.88506  | 1.100961 | 460.2935 | 61.64993 | 23.87318 | 0.197881 | 0.775744 |
| 222.0429 | 1.885068 | 1.100966 | 460.3001 | 61.6502  | 23.87328 | 0.197881 | 0.775771 |
| 222.1042 | 1.885076 | 1.100971 | 460.3067 | 61.65047 | 23.87339 | 0.197882 | 0.775799 |
| 222.1655 | 1.885085 | 1.100976 | 460.3133 | 61.65073 | 23.8735  | 0.197883 | 0.775827 |
| 222.2268 | 1.885093 | 1.10098  | 460.3198 | 61.651   | 23.8736  | 0.197884 | 0.775854 |
| 222.288  | 1.885101 | 1.100985 | 460.3264 | 61.65127 | 23.87371 | 0.197885 | 0.775882 |
| 222.3493 | 1.88511  | 1.10099  | 460.3329 | 61.65153 | 23.87382 | 0.197886 | 0.775909 |
| 222.4106 | 1.885118 | 1.100995 | 460.3395 | 61.6518  | 23.87392 | 0.197887 | 0.775937 |
| 222.4719 | 1.885126 | 1.100999 | 460.346  | 61.65206 | 23.87403 | 0.197887 | 0.775964 |
| 222.5332 | 1.885135 | 1.101004 | 460.3525 | 61.65233 | 23.87413 | 0.197888 | 0.775992 |
| 222.5945 | 1.885143 | 1.101009 | 460.3591 | 61.65259 | 23.87424 | 0.197889 | 0.776019 |
| 222.6558 | 1.885151 | 1.101014 | 460.3656 | 61.65285 | 23.87434 | 0.19789  | 0.776047 |
| 222.7171 | 1.885159 | 1.101018 | 460.3721 | 61.65312 | 23.87445 | 0.197891 | 0.776074 |
| 222.7783 | 1.885168 | 1.101023 | 460.3786 | 61.65338 | 23.87455 | 0.197892 | 0.776101 |
| 222.8396 | 1.885176 | 1.101028 | 460.3851 | 61.65364 | 23.87466 | 0.197892 | 0.776129 |
| 222.9009 | 1.885184 | 1.101032 | 460.3915 | 61.65391 | 23.87476 | 0.197893 | 0.776156 |
| 222.9622 | 1.885192 | 1.101037 | 460.398  | 61.65417 | 23.87487 | 0.197894 | 0.776183 |
| 223.0235 | 1.885201 | 1.101042 | 460.4045 | 61.65443 | 23.87497 | 0.197895 | 0.77621  |
| 223.0848 | 1.885209 | 1.101046 | 460.4109 | 61.65469 | 23.87508 | 0.197896 | 0.776238 |
| 223.1461 | 1.885217 | 1.101051 | 460.4174 | 61.65495 | 23.87518 | 0.197897 | 0.776265 |
| 223.2074 | 1.885225 | 1.101056 | 460.4238 | 61.65521 | 23.87528 | 0.197898 | 0.776292 |
| 223.2686 | 1.885233 | 1.10106  | 460.4302 | 61.65547 | 23.87539 | 0.197898 | 0.776319 |
| 223.3299 | 1.885242 | 1.101065 | 460.4367 | 61.65573 | 23.87549 | 0.197899 | 0.776346 |
| 223.3912 | 1.88525  | 1.10107  | 460.4431 | 61.65599 | 23.87559 | 0.1979   | 0.776373 |
| 223.4525 | 1.885258 | 1.101074 | 460.4495 | 61.65625 | 23.8757  | 0.197901 | 0.7764   |
| 223.5138 | 1.885266 | 1.101079 | 460.4559 | 61.65651 | 23.8758  | 0.197902 | 0.776427 |
| 223.5751 | 1.885274 | 1.101083 | 460.4623 | 61.65677 | 23.8759  | 0.197903 | 0.776454 |
| 223.6364 | 1.885282 | 1.101088 | 460.4686 | 61.65703 | 23.87601 | 0.197903 | 0.776481 |
| 223.6977 | 1.88529  | 1.101093 | 460.475  | 61.65729 | 23.87611 | 0.197904 | 0.776508 |
| 223.7589 | 1.885298 | 1.101097 | 460.4814 | 61.65755 | 23.87621 | 0.197905 | 0.776535 |
| 223.8202 | 1.885307 | 1.101102 | 460.4877 | 61.6578  | 23.87632 | 0.197906 | 0.776562 |
| 223.8815 | 1.885315 | 1.101106 | 460.4941 | 61.65806 | 23.87642 | 0.197907 | 0.776589 |
| 223.9428 | 1.885323 | 1.101111 | 460.5004 | 61.65832 | 23.87652 | 0.197908 | 0.776616 |
| 224.0041 | 1.885331 | 1.101116 | 460.5068 | 61.65857 | 23.87662 | 0.197908 | 0.776643 |
| 224.0654 | 1.885339 | 1.10112  | 460.5131 | 61.65883 | 23.87673 | 0.197909 | 0.776669 |
| 224.1267 | 1.885347 | 1.101125 | 460.5194 | 61.65909 | 23.87683 | 0.19791  | 0.776696 |
| 224.1879 | 1.885355 | 1.101129 | 460.5257 | 61.65934 | 23.87693 | 0.197911 | 0.776723 |
| 224.2492 | 1.885363 | 1.101134 | 460.532  | 61.6596  | 23.87703 | 0.197912 | 0.77675  |
| 224.3105 | 1.885371 | 1.101138 | 460.5383 | 61.65985 | 23.87713 | 0.197912 | 0.776776 |
| 224.3718 | 1.885379 | 1.101143 | 460.5446 | 61.66011 | 23.87723 | 0.197913 | 0.776803 |
| 224.4331 | 1.885387 | 1.101148 | 460.5509 | 61.66036 | 23.87734 | 0.197914 | 0.77683  |
| 224.4944 | 1.885395 | 1.101152 | 460.5571 | 61.66062 | 23.87744 | 0.197915 | 0.776856 |
| 224.5557 | 1.885403 | 1.101157 | 460.5634 | 61.66087 | 23.87754 | 0.197916 | 0.776883 |

|          |          |          |          |          |          |          |          |
|----------|----------|----------|----------|----------|----------|----------|----------|
| 224.617  | 1.885411 | 1.101161 | 460.5697 | 61.66112 | 23.87764 | 0.197917 | 0.776909 |
| 224.6782 | 1.885419 | 1.101166 | 460.5759 | 61.66138 | 23.87774 | 0.197917 | 0.776936 |
| 224.7395 | 1.885427 | 1.10117  | 460.5821 | 61.66163 | 23.87784 | 0.197918 | 0.776962 |
| 224.8008 | 1.885434 | 1.101175 | 460.5884 | 61.66188 | 23.87794 | 0.197919 | 0.776989 |
| 224.8621 | 1.885442 | 1.101179 | 460.5946 | 61.66213 | 23.87804 | 0.19792  | 0.777015 |
| 224.9234 | 1.88545  | 1.101184 | 460.6008 | 61.66239 | 23.87814 | 0.197921 | 0.777042 |
| 224.9847 | 1.885458 | 1.101188 | 460.607  | 61.66264 | 23.87824 | 0.197921 | 0.777068 |
| 225.046  | 1.885466 | 1.101193 | 460.6132 | 61.66289 | 23.87834 | 0.197922 | 0.777094 |
| 225.1073 | 1.885474 | 1.101197 | 460.6194 | 61.66314 | 23.87844 | 0.197923 | 0.777121 |
| 225.1685 | 1.885482 | 1.101202 | 460.6256 | 61.66339 | 23.87854 | 0.197924 | 0.777147 |
| 225.2298 | 1.88549  | 1.101206 | 460.6318 | 61.66364 | 23.87864 | 0.197925 | 0.777173 |
| 225.2911 | 1.885498 | 1.101211 | 460.6379 | 61.66389 | 23.87874 | 0.197925 | 0.7772   |
| 225.3524 | 1.885505 | 1.101215 | 460.6441 | 61.66414 | 23.87884 | 0.197926 | 0.777226 |
| 225.4137 | 1.885513 | 1.101219 | 460.6503 | 61.66439 | 23.87894 | 0.197927 | 0.777252 |
| 225.475  | 1.885521 | 1.101224 | 460.6564 | 61.66464 | 23.87904 | 0.197928 | 0.777278 |
| 225.5363 | 1.885529 | 1.101228 | 460.6625 | 61.66489 | 23.87914 | 0.197929 | 0.777304 |
| 225.5975 | 1.885537 | 1.101233 | 460.6687 | 61.66514 | 23.87924 | 0.197929 | 0.77733  |
| 225.6588 | 1.885544 | 1.101237 | 460.6748 | 61.66538 | 23.87934 | 0.19793  | 0.777357 |
| 225.7201 | 1.885552 | 1.101242 | 460.6809 | 61.66563 | 23.87944 | 0.197931 | 0.777383 |
| 225.7814 | 1.88556  | 1.101246 | 460.687  | 61.66588 | 23.87954 | 0.197932 | 0.777409 |
| 225.8427 | 1.885568 | 1.10125  | 460.6931 | 61.66613 | 23.87963 | 0.197933 | 0.777435 |
| 225.904  | 1.885575 | 1.101255 | 460.6992 | 61.66637 | 23.87973 | 0.197933 | 0.777461 |
| 225.9653 | 1.885583 | 1.101259 | 460.7053 | 61.66662 | 23.87983 | 0.197934 | 0.777487 |
| 226.0266 | 1.885591 | 1.101264 | 460.7114 | 61.66687 | 23.87993 | 0.197935 | 0.777513 |
| 226.0878 | 1.885599 | 1.101268 | 460.7175 | 61.66711 | 23.88003 | 0.197936 | 0.777538 |
| 226.1491 | 1.885606 | 1.101272 | 460.7235 | 61.66736 | 23.88013 | 0.197937 | 0.777564 |
| 226.2104 | 1.885614 | 1.101277 | 460.7296 | 61.6676  | 23.88022 | 0.197937 | 0.77759  |
| 226.2717 | 1.885622 | 1.101281 | 460.7356 | 61.66785 | 23.88032 | 0.197938 | 0.777616 |
| 226.333  | 1.885629 | 1.101286 | 460.7417 | 61.66809 | 23.88042 | 0.197939 | 0.777642 |
| 226.3943 | 1.885637 | 1.10129  | 460.7477 | 61.66834 | 23.88052 | 0.19794  | 0.777668 |
| 226.4556 | 1.885645 | 1.101294 | 460.7537 | 61.66858 | 23.88061 | 0.19794  | 0.777693 |
| 226.5169 | 1.885652 | 1.101299 | 460.7597 | 61.66883 | 23.88071 | 0.197941 | 0.777719 |
| 226.5781 | 1.88566  | 1.101303 | 460.7657 | 61.66907 | 23.88081 | 0.197942 | 0.777745 |
| 226.6394 | 1.885668 | 1.101307 | 460.7717 | 61.66931 | 23.8809  | 0.197943 | 0.777771 |
| 226.7007 | 1.885675 | 1.101312 | 460.7777 | 61.66956 | 23.881   | 0.197944 | 0.777796 |
| 226.762  | 1.885683 | 1.101316 | 460.7837 | 61.6698  | 23.8811  | 0.197944 | 0.777822 |
| 226.8233 | 1.88569  | 1.10132  | 460.7897 | 61.67004 | 23.88119 | 0.197945 | 0.777847 |
| 226.8846 | 1.885698 | 1.101325 | 460.7957 | 61.67028 | 23.88129 | 0.197946 | 0.777873 |
| 226.9459 | 1.885706 | 1.101329 | 460.8017 | 61.67053 | 23.88139 | 0.197947 | 0.777899 |
| 227.0072 | 1.885713 | 1.101333 | 460.8076 | 61.67077 | 23.88148 | 0.197948 | 0.777924 |
| 227.0684 | 1.885721 | 1.101338 | 460.8136 | 61.67101 | 23.88158 | 0.197948 | 0.77795  |
| 227.1297 | 1.885728 | 1.101342 | 460.8195 | 61.67125 | 23.88168 | 0.197949 | 0.777975 |
| 227.191  | 1.885736 | 1.101346 | 460.8254 | 61.67149 | 23.88177 | 0.19795  | 0.778001 |
| 227.2523 | 1.885743 | 1.101351 | 460.8314 | 61.67173 | 23.88187 | 0.197951 | 0.778026 |
| 227.3136 | 1.885751 | 1.101355 | 460.8373 | 61.67197 | 23.88196 | 0.197951 | 0.778051 |
| 227.3749 | 1.885758 | 1.101359 | 460.8432 | 61.67221 | 23.88206 | 0.197952 | 0.778077 |
| 227.4362 | 1.885766 | 1.101363 | 460.8491 | 61.67245 | 23.88215 | 0.197953 | 0.778102 |

|          |          |          |          |          |          |          |          |
|----------|----------|----------|----------|----------|----------|----------|----------|
| 227.4974 | 1.885773 | 1.101368 | 460.855  | 61.67269 | 23.88225 | 0.197954 | 0.778127 |
| 227.5587 | 1.885781 | 1.101372 | 460.8609 | 61.67293 | 23.88235 | 0.197954 | 0.778153 |
| 227.62   | 1.885788 | 1.101376 | 460.8668 | 61.67317 | 23.88244 | 0.197955 | 0.778178 |
| 227.6813 | 1.885796 | 1.10138  | 460.8727 | 61.6734  | 23.88254 | 0.197956 | 0.778203 |
| 227.7426 | 1.885803 | 1.101385 | 460.8786 | 61.67364 | 23.88263 | 0.197957 | 0.778229 |
| 227.8039 | 1.885811 | 1.101389 | 460.8844 | 61.67388 | 23.88272 | 0.197958 | 0.778254 |
| 227.8652 | 1.885818 | 1.101393 | 460.8903 | 61.67412 | 23.88282 | 0.197958 | 0.778279 |
| 227.9265 | 1.885826 | 1.101397 | 460.8961 | 61.67435 | 23.88291 | 0.197959 | 0.778304 |
| 227.9877 | 1.885833 | 1.101402 | 460.902  | 61.67459 | 23.88301 | 0.19796  | 0.778329 |
| 228.049  | 1.885841 | 1.101406 | 460.9078 | 61.67483 | 23.8831  | 0.197961 | 0.778354 |
| 228.1103 | 1.885848 | 1.10141  | 460.9136 | 61.67506 | 23.8832  | 0.197961 | 0.778379 |
| 228.1716 | 1.885855 | 1.101414 | 460.9195 | 61.6753  | 23.88329 | 0.197962 | 0.778404 |
| 228.2329 | 1.885863 | 1.101418 | 460.9253 | 61.67554 | 23.88338 | 0.197963 | 0.778429 |
| 228.2942 | 1.88587  | 1.101423 | 460.9311 | 61.67577 | 23.88348 | 0.197964 | 0.778454 |
| 228.3555 | 1.885878 | 1.101427 | 460.9369 | 61.67601 | 23.88357 | 0.197964 | 0.778479 |
| 228.4168 | 1.885885 | 1.101431 | 460.9427 | 61.67624 | 23.88367 | 0.197965 | 0.778504 |
| 228.478  | 1.885892 | 1.101435 | 460.9485 | 61.67647 | 23.88376 | 0.197966 | 0.778529 |
| 228.5393 | 1.8859   | 1.101439 | 460.9542 | 61.67671 | 23.88385 | 0.197967 | 0.778554 |
| 228.6006 | 1.885907 | 1.101444 | 460.96   | 61.67694 | 23.88395 | 0.197967 | 0.778579 |
| 228.6619 | 1.885914 | 1.101448 | 460.9658 | 61.67718 | 23.88404 | 0.197968 | 0.778604 |
| 228.7232 | 1.885922 | 1.101452 | 460.9715 | 61.67741 | 23.88413 | 0.197969 | 0.778629 |
| 228.7845 | 1.885929 | 1.101456 | 460.9773 | 61.67764 | 23.88422 | 0.19797  | 0.778654 |
| 228.8458 | 1.885936 | 1.10146  | 460.983  | 61.67788 | 23.88432 | 0.19797  | 0.778678 |
| 228.907  | 1.885944 | 1.101464 | 460.9888 | 61.67811 | 23.88441 | 0.197971 | 0.778703 |
| 228.9683 | 1.885951 | 1.101469 | 460.9945 | 61.67834 | 23.8845  | 0.197972 | 0.778728 |
| 229.0296 | 1.885958 | 1.101473 | 461.0002 | 61.67857 | 23.8846  | 0.197973 | 0.778752 |
| 229.0909 | 1.885965 | 1.101477 | 461.0059 | 61.6788  | 23.88469 | 0.197973 | 0.778777 |
| 229.1522 | 1.885973 | 1.101481 | 461.0116 | 61.67904 | 23.88478 | 0.197974 | 0.778802 |
| 229.2135 | 1.88598  | 1.101485 | 461.0173 | 61.67927 | 23.88487 | 0.197975 | 0.778826 |
| 229.2748 | 1.885987 | 1.101489 | 461.023  | 61.6795  | 23.88496 | 0.197976 | 0.778851 |
| 229.3361 | 1.885994 | 1.101493 | 461.0287 | 61.67973 | 23.88506 | 0.197976 | 0.778876 |
| 229.3973 | 1.886002 | 1.101497 | 461.0344 | 61.67996 | 23.88515 | 0.197977 | 0.7789   |
| 229.4586 | 1.886009 | 1.101501 | 461.0401 | 61.68019 | 23.88524 | 0.197978 | 0.778925 |
| 229.5199 | 1.886016 | 1.101506 | 461.0458 | 61.68042 | 23.88533 | 0.197979 | 0.778949 |
| 229.5812 | 1.886023 | 1.10151  | 461.0514 | 61.68065 | 23.88542 | 0.197979 | 0.778974 |
| 229.6425 | 1.88603  | 1.101514 | 461.0571 | 61.68088 | 23.88551 | 0.19798  | 0.778998 |
| 229.7038 | 1.886038 | 1.101518 | 461.0627 | 61.68111 | 23.8856  | 0.197981 | 0.779023 |
| 229.7651 | 1.886045 | 1.101522 | 461.0684 | 61.68133 | 23.8857  | 0.197981 | 0.779047 |
| 229.8264 | 1.886052 | 1.101526 | 461.074  | 61.68156 | 23.88579 | 0.197982 | 0.779071 |
| 229.8876 | 1.886059 | 1.10153  | 461.0796 | 61.68179 | 23.88588 | 0.197983 | 0.779096 |
| 229.9489 | 1.886066 | 1.101534 | 461.0852 | 61.68202 | 23.88597 | 0.197984 | 0.77912  |
| 230.0102 | 1.886073 | 1.101538 | 461.0909 | 61.68225 | 23.88606 | 0.197984 | 0.779144 |
| 230.0715 | 1.88608  | 1.101542 | 461.0965 | 61.68247 | 23.88615 | 0.197985 | 0.779169 |
| 230.1328 | 1.886088 | 1.101546 | 461.1021 | 61.6827  | 23.88624 | 0.197986 | 0.779193 |
| 230.1941 | 1.886095 | 1.10155  | 461.1077 | 61.68293 | 23.88633 | 0.197987 | 0.779217 |
| 230.2554 | 1.886102 | 1.101554 | 461.1132 | 61.68315 | 23.88642 | 0.197987 | 0.779241 |
| 230.3166 | 1.886109 | 1.101558 | 461.1188 | 61.68338 | 23.88651 | 0.197988 | 0.779266 |



|          |          |          |          |          |          |          |          |
|----------|----------|----------|----------|----------|----------|----------|----------|
| 230.3779 | 1.886116 | 1.101562 | 461.1244 | 61.6836  | 23.8866  | 0.197989 | 0.77929  |
| 230.4392 | 1.886123 | 1.101567 | 461.13   | 61.68383 | 23.88669 | 0.197989 | 0.779314 |
| 230.5005 | 1.88613  | 1.101571 | 461.1355 | 61.68406 | 23.88678 | 0.19799  | 0.779338 |
| 230.5618 | 1.886137 | 1.101575 | 461.1411 | 61.68428 | 23.88687 | 0.197991 | 0.779362 |
| 230.6231 | 1.886144 | 1.101579 | 461.1466 | 61.68451 | 23.88696 | 0.197992 | 0.779386 |
| 230.6844 | 1.886151 | 1.101583 | 461.1522 | 61.68473 | 23.88705 | 0.197992 | 0.77941  |
| 230.7457 | 1.886158 | 1.101587 | 461.1577 | 61.68495 | 23.88714 | 0.197993 | 0.779434 |
| 230.8069 | 1.886165 | 1.101591 | 461.1632 | 61.68518 | 23.88723 | 0.197994 | 0.779458 |
| 230.8682 | 1.886172 | 1.101595 | 461.1688 | 61.6854  | 23.88732 | 0.197995 | 0.779482 |
| 230.9295 | 1.886179 | 1.101599 | 461.1743 | 61.68563 | 23.88741 | 0.197995 | 0.779506 |
| 230.9908 | 1.886186 | 1.101603 | 461.1798 | 61.68585 | 23.8875  | 0.197996 | 0.77953  |
| 231.0521 | 1.886193 | 1.101607 | 461.1853 | 61.68607 | 23.88758 | 0.197997 | 0.779554 |
| 231.1134 | 1.8862   | 1.10161  | 461.1908 | 61.68629 | 23.88767 | 0.197997 | 0.779578 |
| 231.1747 | 1.886207 | 1.101614 | 461.1963 | 61.68652 | 23.88776 | 0.197998 | 0.779602 |
| 231.236  | 1.886214 | 1.101618 | 461.2017 | 61.68674 | 23.88785 | 0.197999 | 0.779625 |
| 231.2972 | 1.886221 | 1.101622 | 461.2072 | 61.68696 | 23.88794 | 0.198    | 0.779649 |
| 231.3585 | 1.886228 | 1.101626 | 461.2127 | 61.68718 | 23.88803 | 0.198    | 0.779673 |
| 231.4198 | 1.886235 | 1.10163  | 461.2181 | 61.6874  | 23.88812 | 0.198001 | 0.779697 |
| 231.4811 | 1.886242 | 1.101634 | 461.2236 | 61.68762 | 23.8882  | 0.198002 | 0.77972  |
| 231.5424 | 1.886249 | 1.101638 | 461.2291 | 61.68785 | 23.88829 | 0.198002 | 0.779744 |
| 231.6037 | 1.886256 | 1.101642 | 461.2345 | 61.68807 | 23.88838 | 0.198003 | 0.779768 |
| 231.665  | 1.886263 | 1.101646 | 461.2399 | 61.68829 | 23.88847 | 0.198004 | 0.779792 |
| 231.7263 | 1.88627  | 1.10165  | 461.2454 | 61.68851 | 23.88855 | 0.198005 | 0.779815 |
| 231.7875 | 1.886277 | 1.101654 | 461.2508 | 61.68873 | 23.88864 | 0.198005 | 0.779839 |
| 231.8488 | 1.886283 | 1.101658 | 461.2562 | 61.68895 | 23.88873 | 0.198006 | 0.779862 |
| 231.9101 | 1.88629  | 1.101662 | 461.2616 | 61.68917 | 23.88882 | 0.198007 | 0.779886 |
| 231.9714 | 1.886297 | 1.101666 | 461.267  | 61.68938 | 23.8889  | 0.198007 | 0.779909 |
| 232.0327 | 1.886304 | 1.10167  | 461.2724 | 61.6896  | 23.88899 | 0.198008 | 0.779933 |
| 232.094  | 1.886311 | 1.101673 | 461.2778 | 61.68982 | 23.88908 | 0.198009 | 0.779956 |
| 232.1553 | 1.886318 | 1.101677 | 461.2832 | 61.69004 | 23.88917 | 0.198009 | 0.77998  |
| 232.2165 | 1.886325 | 1.101681 | 461.2886 | 61.69026 | 23.88925 | 0.19801  | 0.780003 |
| 232.2778 | 1.886331 | 1.101685 | 461.294  | 61.69048 | 23.88934 | 0.198011 | 0.780027 |
| 232.3391 | 1.886338 | 1.101689 | 461.2993 | 61.69069 | 23.88943 | 0.198012 | 0.78005  |
| 232.4004 | 1.886345 | 1.101693 | 461.3047 | 61.69091 | 23.88951 | 0.198012 | 0.780074 |
| 232.4617 | 1.886352 | 1.101697 | 461.31   | 61.69113 | 23.8896  | 0.198013 | 0.780097 |
| 232.523  | 1.886359 | 1.101701 | 461.3154 | 61.69134 | 23.88969 | 0.198014 | 0.78012  |
| 232.5843 | 1.886365 | 1.101705 | 461.3207 | 61.69156 | 23.88977 | 0.198014 | 0.780144 |
| 232.6456 | 1.886372 | 1.101708 | 461.3261 | 61.69178 | 23.88986 | 0.198015 | 0.780167 |
| 232.7068 | 1.886379 | 1.101712 | 461.3314 | 61.69199 | 23.88994 | 0.198016 | 0.78019  |
| 232.7681 | 1.886386 | 1.101716 | 461.3367 | 61.69221 | 23.89003 | 0.198016 | 0.780213 |
| 232.8294 | 1.886393 | 1.10172  | 461.342  | 61.69242 | 23.89012 | 0.198017 | 0.780237 |
| 232.8907 | 1.886399 | 1.101724 | 461.3474 | 61.69264 | 23.8902  | 0.198018 | 0.78026  |
| 232.952  | 1.886406 | 1.101728 | 461.3527 | 61.69285 | 23.89029 | 0.198018 | 0.780283 |
| 233.0133 | 1.886413 | 1.101731 | 461.358  | 61.69307 | 23.89037 | 0.198019 | 0.780306 |
| 233.0746 | 1.886419 | 1.101735 | 461.3633 | 61.69328 | 23.89046 | 0.19802  | 0.780329 |
| 233.1359 | 1.886426 | 1.101739 | 461.3685 | 61.6935  | 23.89054 | 0.198021 | 0.780352 |
| 233.1971 | 1.886433 | 1.101743 | 461.3738 | 61.69371 | 23.89063 | 0.198021 | 0.780375 |

|          |          |          |          |          |          |          |          |
|----------|----------|----------|----------|----------|----------|----------|----------|
| 233.2584 | 1.88644  | 1.101747 | 461.3791 | 61.69393 | 23.89071 | 0.198022 | 0.780398 |
| 233.3197 | 1.886446 | 1.101751 | 461.3844 | 61.69414 | 23.8908  | 0.198023 | 0.780421 |
| 233.381  | 1.886453 | 1.101754 | 461.3896 | 61.69435 | 23.89088 | 0.198023 | 0.780444 |
| 233.4423 | 1.88646  | 1.101758 | 461.3949 | 61.69457 | 23.89097 | 0.198024 | 0.780467 |
| 233.5036 | 1.886466 | 1.101762 | 461.4001 | 61.69478 | 23.89105 | 0.198025 | 0.78049  |
| 233.5649 | 1.886473 | 1.101766 | 461.4054 | 61.69499 | 23.89114 | 0.198025 | 0.780513 |
| 233.6261 | 1.88648  | 1.10177  | 461.4106 | 61.6952  | 23.89122 | 0.198026 | 0.780536 |
| 233.6874 | 1.886486 | 1.101773 | 461.4159 | 61.69542 | 23.89131 | 0.198027 | 0.780559 |
| 233.7487 | 1.886493 | 1.101777 | 461.4211 | 61.69563 | 23.89139 | 0.198027 | 0.780582 |
| 233.81   | 1.8865   | 1.101781 | 461.4263 | 61.69584 | 23.89148 | 0.198028 | 0.780605 |
| 233.8713 | 1.886506 | 1.101785 | 461.4315 | 61.69605 | 23.89156 | 0.198029 | 0.780628 |
| 233.9326 | 1.886513 | 1.101788 | 461.4367 | 61.69626 | 23.89165 | 0.198029 | 0.78065  |
| 233.9939 | 1.886519 | 1.101792 | 461.4419 | 61.69647 | 23.89173 | 0.19803  | 0.780673 |
| 234.0552 | 1.886526 | 1.101796 | 461.4471 | 61.69668 | 23.89181 | 0.198031 | 0.780696 |
| 234.1164 | 1.886533 | 1.1018   | 461.4523 | 61.69689 | 23.8919  | 0.198031 | 0.780719 |
| 234.1777 | 1.886539 | 1.101803 | 461.4575 | 61.6971  | 23.89198 | 0.198032 | 0.780741 |
| 234.239  | 1.886546 | 1.101807 | 461.4627 | 61.69731 | 23.89206 | 0.198033 | 0.780764 |
| 234.3003 | 1.886552 | 1.101811 | 461.4679 | 61.69752 | 23.89215 | 0.198033 | 0.780787 |
| 234.3616 | 1.886559 | 1.101815 | 461.473  | 61.69773 | 23.89223 | 0.198034 | 0.780809 |
| 234.4229 | 1.886566 | 1.101818 | 461.4782 | 61.69794 | 23.89231 | 0.198035 | 0.780832 |
| 234.4842 | 1.886572 | 1.101822 | 461.4834 | 61.69815 | 23.8924  | 0.198035 | 0.780855 |
| 234.5455 | 1.886579 | 1.101826 | 461.4885 | 61.69836 | 23.89248 | 0.198036 | 0.780877 |
| 234.6067 | 1.886585 | 1.10183  | 461.4937 | 61.69857 | 23.89256 | 0.198037 | 0.7809   |
| 234.668  | 1.886592 | 1.101833 | 461.4988 | 61.69878 | 23.89265 | 0.198037 | 0.780922 |
| 234.7293 | 1.886598 | 1.101837 | 461.5039 | 61.69898 | 23.89273 | 0.198038 | 0.780945 |
| 234.7906 | 1.886605 | 1.101841 | 461.5091 | 61.69919 | 23.89281 | 0.198039 | 0.780967 |
| 234.8519 | 1.886611 | 1.101844 | 461.5142 | 61.6994  | 23.8929  | 0.198039 | 0.78099  |
| 234.9132 | 1.886618 | 1.101848 | 461.5193 | 61.69961 | 23.89298 | 0.19804  | 0.781012 |
| 234.9745 | 1.886624 | 1.101852 | 461.5244 | 61.69981 | 23.89306 | 0.198041 | 0.781035 |
| 235.0358 | 1.886631 | 1.101856 | 461.5295 | 61.70002 | 23.89314 | 0.198041 | 0.781057 |
| 235.097  | 1.886637 | 1.101859 | 461.5346 | 61.70023 | 23.89323 | 0.198042 | 0.781079 |
| 235.1583 | 1.886644 | 1.101863 | 461.5397 | 61.70043 | 23.89331 | 0.198043 | 0.781102 |
| 235.2196 | 1.88665  | 1.101867 | 461.5448 | 61.70064 | 23.89339 | 0.198043 | 0.781124 |
| 235.2809 | 1.886657 | 1.10187  | 461.5499 | 61.70085 | 23.89347 | 0.198044 | 0.781146 |
| 235.3422 | 1.886663 | 1.101874 | 461.555  | 61.70105 | 23.89355 | 0.198045 | 0.781169 |
| 235.4035 | 1.88667  | 1.101878 | 461.5601 | 61.70126 | 23.89364 | 0.198045 | 0.781191 |
| 235.4648 | 1.886676 | 1.101881 | 461.5651 | 61.70146 | 23.89372 | 0.198046 | 0.781213 |
| 235.526  | 1.886682 | 1.101885 | 461.5702 | 61.70167 | 23.8938  | 0.198047 | 0.781235 |
| 235.5873 | 1.886689 | 1.101889 | 461.5752 | 61.70187 | 23.89388 | 0.198047 | 0.781257 |
| 235.6486 | 1.886695 | 1.101892 | 461.5803 | 61.70208 | 23.89396 | 0.198048 | 0.78128  |
| 235.7099 | 1.886702 | 1.101896 | 461.5853 | 61.70228 | 23.89404 | 0.198049 | 0.781302 |
| 235.7712 | 1.886708 | 1.101899 | 461.5903 | 61.70248 | 23.89412 | 0.198049 | 0.781324 |
| 235.8325 | 1.886714 | 1.101903 | 461.5952 | 61.70268 | 23.8942  | 0.19805  | 0.781346 |
| 235.8938 | 1.886721 | 1.101907 | 461.6002 | 61.70288 | 23.89428 | 0.198051 | 0.781368 |
| 235.9551 | 1.886727 | 1.10191  | 461.6052 | 61.70309 | 23.89436 | 0.198051 | 0.78139  |
| 236.0163 | 1.886733 | 1.101914 | 461.6101 | 61.70329 | 23.89444 | 0.198052 | 0.781412 |
| 236.0776 | 1.886739 | 1.101917 | 461.6151 | 61.70349 | 23.89452 | 0.198053 | 0.781434 |

|          |          |          |          |          |          |          |          |
|----------|----------|----------|----------|----------|----------|----------|----------|
| 236.1389 | 1.886746 | 1.101921 | 461.62   | 61.70369 | 23.8946  | 0.198053 | 0.781456 |
| 236.2002 | 1.886752 | 1.101925 | 461.625  | 61.70389 | 23.89468 | 0.198054 | 0.781478 |
| 236.2615 | 1.886758 | 1.101928 | 461.6299 | 61.70409 | 23.89476 | 0.198055 | 0.7815   |
| 236.3228 | 1.886765 | 1.101932 | 461.6348 | 61.70429 | 23.89484 | 0.198055 | 0.781522 |
| 236.3841 | 1.886771 | 1.101935 | 461.6398 | 61.70449 | 23.89492 | 0.198056 | 0.781544 |
| 236.4454 | 1.886777 | 1.101939 | 461.6447 | 61.70469 | 23.895   | 0.198056 | 0.781566 |
| 236.5066 | 1.886783 | 1.101942 | 461.6496 | 61.70489 | 23.89508 | 0.198057 | 0.781588 |
| 236.5679 | 1.88679  | 1.101946 | 461.6545 | 61.70508 | 23.89516 | 0.198058 | 0.781609 |
| 236.6292 | 1.886796 | 1.101949 | 461.6594 | 61.70528 | 23.89524 | 0.198058 | 0.781631 |
| 236.6905 | 1.886802 | 1.101953 | 461.6643 | 61.70548 | 23.89532 | 0.198059 | 0.781653 |
| 236.7518 | 1.886808 | 1.101957 | 461.6692 | 61.70568 | 23.8954  | 0.19806  | 0.781675 |
| 236.8131 | 1.886814 | 1.10196  | 461.6741 | 61.70588 | 23.89548 | 0.19806  | 0.781697 |
| 236.8744 | 1.886821 | 1.101964 | 461.6789 | 61.70607 | 23.89556 | 0.198061 | 0.781718 |
| 236.9356 | 1.886827 | 1.101967 | 461.6838 | 61.70627 | 23.89563 | 0.198062 | 0.78174  |
| 236.9969 | 1.886833 | 1.101971 | 461.6887 | 61.70647 | 23.89571 | 0.198062 | 0.781762 |
| 237.0582 | 1.886839 | 1.101974 | 461.6935 | 61.70667 | 23.89579 | 0.198063 | 0.781783 |
| 237.1195 | 1.886845 | 1.101978 | 461.6984 | 61.70686 | 23.89587 | 0.198063 | 0.781805 |
| 237.1808 | 1.886851 | 1.101981 | 461.7032 | 61.70706 | 23.89595 | 0.198064 | 0.781827 |
| 237.2421 | 1.886858 | 1.101985 | 461.7081 | 61.70726 | 23.89603 | 0.198065 | 0.781848 |
| 237.3034 | 1.886864 | 1.101988 | 461.7129 | 61.70745 | 23.8961  | 0.198065 | 0.78187  |
| 237.3647 | 1.88687  | 1.101992 | 461.7177 | 61.70765 | 23.89618 | 0.198066 | 0.781891 |
| 237.4259 | 1.886876 | 1.101995 | 461.7226 | 61.70784 | 23.89626 | 0.198067 | 0.781913 |
| 237.4872 | 1.886882 | 1.101999 | 461.7274 | 61.70804 | 23.89634 | 0.198067 | 0.781934 |
| 237.5485 | 1.886888 | 1.102002 | 461.7322 | 61.70823 | 23.89642 | 0.198068 | 0.781956 |
| 237.6098 | 1.886894 | 1.102006 | 461.737  | 61.70843 | 23.89649 | 0.198069 | 0.781977 |
| 237.6711 | 1.886901 | 1.102009 | 461.7418 | 61.70862 | 23.89657 | 0.198069 | 0.781999 |
| 237.7324 | 1.886907 | 1.102013 | 461.7466 | 61.70882 | 23.89665 | 0.19807  | 0.78202  |
| 237.7937 | 1.886913 | 1.102016 | 461.7514 | 61.70901 | 23.89673 | 0.19807  | 0.782041 |
| 237.855  | 1.886919 | 1.102019 | 461.7561 | 61.7092  | 23.8968  | 0.198071 | 0.782063 |
| 237.9162 | 1.886925 | 1.102023 | 461.7609 | 61.7094  | 23.89688 | 0.198072 | 0.782084 |
| 237.9775 | 1.886931 | 1.102026 | 461.7657 | 61.70959 | 23.89696 | 0.198072 | 0.782106 |
| 238.0388 | 1.886937 | 1.10203  | 461.7704 | 61.70978 | 23.89703 | 0.198073 | 0.782127 |
| 238.1001 | 1.886943 | 1.102033 | 461.7752 | 61.70998 | 23.89711 | 0.198073 | 0.782148 |
| 238.1614 | 1.886949 | 1.102037 | 461.7799 | 61.71017 | 23.89719 | 0.198074 | 0.782169 |
| 238.2227 | 1.886955 | 1.10204  | 461.7847 | 61.71036 | 23.89726 | 0.198075 | 0.782191 |
| 238.284  | 1.886961 | 1.102044 | 461.7894 | 61.71055 | 23.89734 | 0.198075 | 0.782212 |
| 238.3453 | 1.886967 | 1.102047 | 461.7942 | 61.71074 | 23.89742 | 0.198076 | 0.782233 |
| 238.4065 | 1.886973 | 1.10205  | 461.7989 | 61.71094 | 23.89749 | 0.198077 | 0.782254 |
| 238.4678 | 1.886979 | 1.102054 | 461.8036 | 61.71113 | 23.89757 | 0.198077 | 0.782275 |
| 238.5291 | 1.886985 | 1.102057 | 461.8083 | 61.71132 | 23.89765 | 0.198078 | 0.782297 |
| 238.5904 | 1.886991 | 1.102061 | 461.813  | 61.71151 | 23.89772 | 0.198078 | 0.782318 |
| 238.6517 | 1.886997 | 1.102064 | 461.8177 | 61.7117  | 23.8978  | 0.198079 | 0.782339 |
| 238.713  | 1.887003 | 1.102067 | 461.8224 | 61.71189 | 23.89787 | 0.19808  | 0.78236  |
| 238.7743 | 1.887009 | 1.102071 | 461.8271 | 61.71208 | 23.89795 | 0.19808  | 0.782381 |
| 238.8355 | 1.887015 | 1.102074 | 461.8318 | 61.71227 | 23.89803 | 0.198081 | 0.782402 |
| 238.8968 | 1.887021 | 1.102078 | 461.8365 | 61.71246 | 23.8981  | 0.198081 | 0.782423 |
| 238.9581 | 1.887027 | 1.102081 | 461.8412 | 61.71265 | 23.89818 | 0.198082 | 0.782444 |

|          |          |          |          |          |          |          |          |
|----------|----------|----------|----------|----------|----------|----------|----------|
| 239.0194 | 1.887033 | 1.102084 | 461.8458 | 61.71284 | 23.89825 | 0.198083 | 0.782465 |
| 239.0807 | 1.887039 | 1.102088 | 461.8505 | 61.71303 | 23.89833 | 0.198083 | 0.782486 |
| 239.142  | 1.887045 | 1.102091 | 461.8552 | 61.71322 | 23.8984  | 0.198084 | 0.782507 |
| 239.2033 | 1.887051 | 1.102094 | 461.8598 | 61.7134  | 23.89848 | 0.198084 | 0.782528 |
| 239.2646 | 1.887056 | 1.102098 | 461.8645 | 61.71359 | 23.89855 | 0.198085 | 0.782549 |
| 239.3258 | 1.887062 | 1.102101 | 461.8691 | 61.71378 | 23.89863 | 0.198086 | 0.782569 |
| 239.3871 | 1.887068 | 1.102105 | 461.8737 | 61.71397 | 23.8987  | 0.198086 | 0.78259  |
| 239.4484 | 1.887074 | 1.102108 | 461.8784 | 61.71416 | 23.89878 | 0.198087 | 0.782611 |
| 239.5097 | 1.88708  | 1.102111 | 461.883  | 61.71434 | 23.89885 | 0.198088 | 0.782632 |
| 239.571  | 1.887086 | 1.102115 | 461.8876 | 61.71453 | 23.89893 | 0.198088 | 0.782653 |
| 239.6323 | 1.887092 | 1.102118 | 461.8922 | 61.71472 | 23.899   | 0.198089 | 0.782673 |
| 239.6936 | 1.887098 | 1.102121 | 461.8968 | 61.7149  | 23.89908 | 0.198089 | 0.782694 |
| 239.7549 | 1.887103 | 1.102125 | 461.9014 | 61.71509 | 23.89915 | 0.19809  | 0.782715 |
| 239.8161 | 1.887109 | 1.102128 | 461.906  | 61.71528 | 23.89922 | 0.198091 | 0.782736 |
| 239.8774 | 1.887115 | 1.102131 | 461.9106 | 61.71546 | 23.8993  | 0.198091 | 0.782756 |
| 239.9387 | 1.887121 | 1.102135 | 461.9152 | 61.71565 | 23.89937 | 0.198092 | 0.782777 |
