# Supplementary material
Source: publisher figshare collection journal article supplement (https://wiley.figshare.com/articles/dataset/_/18783164)
Supplement: Supplementary file 2 [file 1]

| Time     | Liver    | Kidney   | Fat      | PPT      | RPT      | Gonads   | Brain    | Venous Blo | Arterial Blood |
|----------|----------|----------|----------|----------|----------|----------|----------|------------|----------------|
|          | 0        | 0        | 0        | 0        | 0        | 0        | 0        | 0          | 117.5619       |
| 1.01E-05 | 0.005918 | 0.017061 | 0.002925 | 0.001682 | 0.009421 | 0.00285  | 0.000113 | 0.000847   | 117.5628       |
| 6.06E-05 | 0.035498 | 0.102253 | 0.01755  | 0.010094 | 0.056532 | 0.017103 | 0.000679 | 0.005082   | 117.567        |
| 0.000313 | 0.183226 | 0.525421 | 0.090709 | 0.052162 | 0.292176 | 0.088385 | 0.003508 | 0.026194   | 117.5879       |
| 0.001577 | 0.917465 | 2.573334 | 0.457334 | 0.262755 | 1.472561 | 0.445248 | 0.017687 | 0.130224   | 117.691        |
| 0.007894 | 4.479366 | 11.33247 | 2.309443 | 1.32094  | 7.422998 | 2.239117 | 0.089319 | 0.616951   | 118.1734       |
| 0.020929 | 11.27173 | 23.9183  | 6.212289 | 3.520907 | 19.89531 | 5.972264 | 0.24028  | 1.495784   | 119.0445       |
| 0.036704 | 18.57446 | 33.74302 | 11.04494 | 6.19159  | 35.21862 | 10.51075 | 0.427233 | 2.431642   | 119.9721       |
| 0.055958 | 26.33438 | 42.24824 | 17.0677  | 9.4417   | 54.13671 | 16.04354 | 0.660266 | 3.484656   | 121.0158       |
| 0.079535 | 34.47003 | 50.72375 | 24.59744 | 13.38992 | 77.52102 | 22.77889 | 0.951668 | 4.713831   | 122.2341       |
| 0.109176 | 43.13513 | 60.40877 | 34.28138 | 18.29246 | 107.1801 | 31.1637  | 1.326534 | 6.212813   | 123.7198       |
| 0.147901 | 52.71024 | 72.53348 | 47.27673 | 24.58732 | 146.2903 | 41.96445 | 1.829749 | 8.12198    | 125.6121       |
| 0.201143 | 63.99619 | 88.70723 | 65.74993 | 33.03405 | 200.625  | 56.51798 | 2.545385 | 10.67368   | 128.1413       |
| 0.276414 | 78.18004 | 110.7508 | 93.01065 | 44.56839 | 278.3562 | 76.50212 | 3.602055 | 14.1523    | 131.5892       |
| 0.34418  | 90.22349 | 129.829  | 118.6509 | 54.55593 | 349.074  | 93.90792 | 4.596534 | 17.16511   | 134.5753       |
| 0.411946 | 102.0068 | 148.2015 | 145.2887 | 64.1819  | 420.336  | 110.7712 | 5.630294 | 20.07165   | 137.4562       |
| 0.475692 | 112.989  | 164.8926 | 171.2229 | 72.91965 | 487.7494 | 126.1515 | 6.637304 | 22.71393   | 140.0751       |
| 0.533587 | 122.916  | 179.6121 | 195.4882 | 80.59918 | 549.2078 | 139.7256 | 7.579976 | 25.04057   | 142.3812       |
| 0.59041  | 132.6265 | 193.6244 | 219.9419 | 87.90823 | 609.6756 | 152.693  | 8.530409 | 27.25805   | 144.5791       |
| 0.652117 | 143.1364 | 208.3438 | 247.1912 | 95.59891 | 675.4366 | 166.3872 | 9.589997 | 29.59412   | 146.8945       |
| 0.719442 | 154.5566 | 223.8322 | 277.7187 | 103.7081 | 747.216  | 180.8807 | 10.77766 | 32.06051   | 149.3391       |
| 0.785908 | 165.7759 | 238.5769 | 308.6448 | 111.4372 | 818.0293 | 194.7453 | 11.98146 | 34.4148    | 151.6726       |
| 0.845748 | 175.8212 | 251.4933 | 337.1337 | 118.1691 | 881.6718 | 206.8608 | 13.09093 | 36.47037   | 153.71         |
| 0.901248 | 185.0864 | 263.1627 | 364.0871 | 124.2285 | 940.5595 | 217.7964 | 14.14107 | 38.32429   | 155.5475       |
| 0.959401 | 194.7381 | 275.0016 | 392.8607 | 130.3941 | 1002.077 | 228.9528 | 15.26262 | 40.21267   | 157.4192       |
| 1.024594 | 205.4839 | 287.8168 | 425.7445 | 137.0911 | 1070.765 | 241.1032 | 16.54498 | 42.26607   | 159.4545       |
| 1.093063 | 216.6787 | 300.7727 | 460.9702 | 143.8892 | 1142.532 | 253.4709 | 17.91936 | 44.35294   | 161.5229       |
| 1.156291 | 226.9267 | 312.3845 | 494.1053 | 149.9609 | 1208.416 | 264.545  | 19.21282 | 46.221     | 163.3745       |
| 1.212401 | 235.9433 | 322.5002 | 523.9809 | 155.1893 | 1266.533 | 274.1015 | 20.37957 | 47.83485   | 164.9741       |
| 1.267658 | 244.751  | 332.1688 | 553.8225 | 160.1969 | 1323.421 | 283.2717 | 21.54548 | 49.3824    | 166.5079       |
| 1.329289 | 254.4882 | 342.5839 | 587.5844 | 165.6226 | 1386.438 | 293.2264 | 22.86514 | 51.06044   | 168.1712       |
| 1.397831 | 265.2064 | 353.7338 | 625.7053 | 171.4663 | 1455.95  | 303.969  | 24.35591 | 52.86944   | 169.9642       |
| 1.46485  | 275.5692 | 364.2409 | 663.5428 | 176.9936 | 1523.3   | 314.1494 | 25.83635 | 54.58282   | 171.6624       |

|          |          |          |          |          |          |          |          |          |          |
|----------|----------|----------|----------|----------|----------|----------|----------|----------|----------|
| 1.523557 | 284.545  | 373.3202 | 697.1282 | 181.6886 | 1581.763 | 322.8114 | 27.15105 | 56.04432 | 173.111  |
| 1.577411 | 292.6952 | 381.4828 | 728.289  | 185.8796 | 1634.941 | 330.5542 | 28.37136 | 57.35232 | 174.4074 |
| 1.634974 | 301.3195 | 389.8992 | 761.9589 | 190.2413 | 1691.29  | 338.6229 | 29.69048 | 58.71394 | 175.757  |
| 1.701195 | 311.1268 | 399.2254 | 801.1413 | 195.1131 | 1755.466 | 347.6473 | 31.22629 | 60.2358  | 177.2654 |
| 1.770976 | 321.3273 | 408.6452 | 842.9323 | 200.0842 | 1822.318 | 356.8685 | 32.86518 | 61.78952 | 178.8054 |
| 1.833881 | 330.4003 | 416.9539 | 881.0317 | 204.4273 | 1881.883 | 364.9347 | 34.36006 | 63.15139 | 180.1553 |
| 1.888443 | 338.1724 | 424.1547 | 914.3933 | 208.0912 | 1932.994 | 371.7469 | 35.66963 | 64.30672 | 181.3004 |
| 1.942564 | 345.7962 | 431.0579 | 947.7684 | 211.6352 | 1983.183 | 378.3418 | 36.98027 | 65.42457 | 182.4084 |
| 2.00462  | 354.4327 | 438.6694 | 986.3733 | 215.5914 | 2040.098 | 385.7106 | 38.49695 | 66.67248 | 183.6452 |
| 2.074743 | 364.0557 | 446.9091 | 1030.415 | 219.9288 | 2103.584 | 393.7967 | 40.2281  | 68.04091 | 185.0016 |
| 2.142364 | 373.1973 | 454.5454 | 1073.293 | 223.9825 | 2163.966 | 401.3607 | 41.91438 | 69.32103 | 186.2704 |
| 2.199937 | 380.8671 | 461.1217 | 1110.1   | 227.3361 | 2214.711 | 407.6235 | 43.36264 | 70.38809 | 187.328  |
| 2.252319 | 387.7576 | 467.0128 | 1143.824 | 230.3124 | 2260.35  | 413.1852 | 44.6901  | 71.338   | 188.2695 |
| 2.30958  | 395.1984 | 473.1706 | 1180.939 | 233.4878 | 2309.663 | 419.1221 | 46.15168 | 72.35022 | 189.2728 |
| 2.377061 | 403.8427 | 480.129  | 1225.002 | 237.1281 | 2366.998 | 425.9322 | 47.88772 | 73.51059 | 190.4229 |
| 2.448189 | 412.8095 | 487.0955 | 1271.814 | 240.8502 | 2426.518 | 432.8996 | 49.73305 | 74.69625 | 191.5981 |
| 2.510703 | 420.5628 | 493.1735 | 1313.257 | 244.0265 | 2478.047 | 438.8485 | 51.36753 | 75.71329 | 192.6062 |
| 2.563802 | 427.0517 | 498.4713 | 1348.669 | 246.6561 | 2521.235 | 443.7759 | 52.76481 | 76.563   | 193.4484 |
| 2.61699  | 433.4702 | 503.5399 | 1384.331 | 249.2308 | 2563.972 | 448.6019 | 54.17255 | 77.39366 | 194.2717 |
| 2.679621 | 440.9237 | 509.2382 | 1426.563 | 252.1885 | 2613.623 | 454.1478 | 55.84039 | 78.34686 | 195.2165 |
| 2.751333 | 449.3194 | 515.4362 | 1475.225 | 255.48   | 2669.581 | 460.3217 | 57.76314 | 79.40667 | 196.2669 |
| 2.819459 | 457.1583 | 521.06   | 1521.745 | 258.5159 | 2721.859 | 466.0179 | 59.60227 | 80.38433 | 197.2359 |
| 2.875937 | 463.5475 | 525.9783 | 1560.516 | 260.9657 | 2764.541 | 470.6161 | 61.1358  | 81.18371 | 198.0282 |
| 2.927031 | 469.2483 | 530.3612 | 1595.748 | 263.1325 | 2802.648 | 474.6839 | 62.52992 | 81.89277 | 198.731  |
| 2.984135 | 475.5351 | 534.9772 | 1635.297 | 265.501  | 2844.676 | 479.1311 | 64.09553 | 82.66525 | 199.4967 |
| 3.05284  | 482.9794 | 540.2664 | 1683.113 | 268.278  | 2894.461 | 484.3462 | 65.98938 | 83.5701  | 200.3935 |
| 3.125163 | 490.6772 | 545.4719 | 1733.714 | 271.1188 | 2945.952 | 489.6818 | 67.99462 | 84.49326 | 201.3085 |
| 3.187264 | 497.1674 | 550.0168 | 1777.37  | 273.4911 | 2989.413 | 494.1384 | 69.72559 | 85.27061 | 202.079  |
| 3.239095 | 502.4968 | 554.053  | 1813.947 | 275.4244 | 3025.153 | 497.7708 | 71.17651 | 85.91305 | 202.7158 |
| 3.291544 | 507.8192 | 557.8732 | 1851.089 | 277.3409 | 3060.843 | 501.3717 | 72.65048 | 86.54691 | 203.344  |
| 3.354726 | 514.1355 | 562.2227 | 1895.999 | 279.5973 | 3103.2   | 505.6117 | 74.43352 | 87.29134 | 204.0819 |
| 3.427817 | 521.3139 | 566.9416 | 1948.173 | 282.1387 | 3151.343 | 510.387  | 76.50609 | 88.1277  | 204.9109 |
| 3.496326 | 527.9173 | 571.1215 | 1997.282 | 284.4556 | 3195.64  | 514.7406 | 78.458   | 88.88934 | 205.6658 |
| 3.551875 | 533.1723 | 574.9286 | 2037.237 | 286.2867 | 3230.96  | 518.1818 | 80.0469  | 89.50432 | 206.2753 |

|          |          |          |          |          |          |          |          |          |          |
|----------|----------|----------|----------|----------|----------|----------|----------|----------|----------|
| 3.601938 | 537.8407 | 578.2897 | 2073.351 | 287.9033 | 3262.349 | 521.2199 | 81.48364 | 90.04833 | 206.8145 |
| 3.658954 | 543.0846 | 581.8242 | 2114.598 | 289.7075 | 3297.595 | 524.6104 | 83.1253  | 90.65167 | 207.4125 |
| 3.728661 | 549.3883 | 585.9015 | 2165.191 | 291.8608 | 3339.966 | 528.6566 | 85.13998 | 91.37022 | 208.1247 |
| 3.801925 | 555.8897 | 589.8136 | 2218.554 | 294.064  | 3383.654 | 532.7962 | 87.26618 | 92.10144 | 208.8495 |
| 3.863679 | 561.2632 | 593.2876 | 2263.674 | 295.8728 | 3419.805 | 536.1947 | 89.06494 | 92.70941 | 209.4521 |
| 3.914534 | 565.6121 | 596.4719 | 2300.922 | 297.3292 | 3449.114 | 538.9314 | 90.55056 | 93.20896 | 209.9472 |
| 3.966436 | 569.9923 | 599.423  | 2339.024 | 298.7882 | 3478.615 | 541.6726 | 92.07085 | 93.70489 | 210.4388 |
| 4.030034 | 575.2773 | 602.7966 | 2385.826 | 300.5387 | 3514.201 | 544.961  | 93.93921 | 94.29736 | 211.026  |
| 4.104166 | 581.3246 | 606.4203 | 2440.534 | 302.5286 | 3554.909 | 548.6985 | 96.12437 | 94.96782 | 211.6905 |
| 4.159038 | 585.714  | 609.3665 | 2481.127 | 303.9654 | 3584.501 | 551.3971 | 97.74662 | 95.46081 | 212.1792 |
| 4.21391  | 590.0377 | 612.1841 | 2521.804 | 305.3739 | 3613.648 | 554.0422 | 99.37293 | 95.94352 | 212.6576 |
| 4.278683 | 595.0591 | 615.3025 | 2569.924 | 307.0013 | 3647.492 | 557.0981 | 101.2978 | 96.49946 | 213.2086 |
| 4.350255 | 600.5055 | 618.4834 | 2623.22  | 308.7565 | 3684.19  | 560.3933 | 103.4309 | 97.09651 | 213.8004 |
| 4.415811 | 605.3984 | 621.3351 | 2672.147 | 310.325  | 3717.166 | 563.3376 | 105.3902 | 97.63181 | 214.331  |
| 4.4706   | 609.41   | 624.0865 | 2713.11  | 311.6061 | 3744.255 | 565.7423 | 107.0315 | 98.07988 | 214.7751 |
| 4.52247  | 613.1523 | 626.5762 | 2751.955 | 312.7964 | 3769.522 | 567.9766 | 108.5886 | 98.49562 | 215.1872 |
| 4.58199  | 617.3829 | 629.1972 | 2796.603 | 314.1366 | 3798.07  | 570.4914 | 110.3791 | 98.96055 | 215.648  |
| 4.652177 | 622.2836 | 632.0669 | 2849.348 | 315.6821 | 3831.128 | 573.391  | 112.4954 | 99.49466 | 216.1774 |
| 4.722691 | 627.1135 | 634.6825 | 2902.438 | 317.1981 | 3863.693 | 576.2345 | 114.6269 | 100.0155 | 216.6937 |
| 4.782089 | 631.1003 | 637.1969 | 2947.231 | 318.445  | 3890.617 | 578.5733 | 116.4262 | 100.4536 | 217.1279 |
| 4.833395 | 634.4856 | 639.5447 | 2985.971 | 319.5007 | 3913.506 | 580.5534 | 117.9832 | 100.8305 | 217.5014 |
| 4.887832 | 638.0281 | 641.7722 | 3027.127 | 320.6018 | 3937.436 | 582.6181 | 119.6379 | 101.2194 | 217.8868 |
| 4.953555 | 642.2354 | 644.2563 | 3076.884 | 321.9049 | 3965.843 | 585.0611 | 121.6394 | 101.6773 | 218.3407 |
| 5.026521 | 646.8193 | 646.7258 | 3132.206 | 323.3192 | 3996.771 | 587.7118 | 123.8662 | 102.1705 | 218.8296 |
| 5.092073 | 650.8563 | 648.9158 | 3181.977 | 324.5605 | 4024.015 | 590.0379 | 125.8706 | 102.6053 | 219.2605 |
| 5.145716 | 654.0936 | 651.1912 | 3222.747 | 325.5538 | 4045.921 | 591.8995 | 127.5134 | 102.9663 | 219.6184 |
| 5.19667  | 657.1255 | 653.1905 | 3261.512 | 326.4817 | 4066.425 | 593.6381 | 129.0761 | 103.3015 | 219.9505 |
| 5.256451 | 660.631  | 655.2869 | 3307.036 | 327.5516 | 4090.109 | 595.6422 | 130.9121 | 103.684  | 220.3297 |
| 5.327935 | 664.7482 | 657.5686 | 3361.533 | 328.8046 | 4117.91  | 597.9886 | 133.1113 | 104.1293 | 220.7711 |
| 5.399178 | 668.7736 | 659.5443 | 3415.909 | 330.0257 | 4145.065 | 600.2749 | 135.3068 | 104.559  | 221.197  |
| 5.457892 | 672.0207 | 661.6014 | 3460.76  | 331.009  | 4167.022 | 602.1159 | 137.1188 | 104.9169 | 221.5518 |
| 5.508137 | 674.7522 | 663.5488 | 3499.17  | 331.8349 | 4185.517 | 603.6621 | 138.6713 | 105.2234 | 221.8555 |
| 5.56225  | 677.6558 | 665.343  | 3540.567 | 332.7109 | 4205.148 | 605.3016 | 140.3453 | 105.543  | 222.1723 |
| 5.628743 | 681.1661 | 667.344  | 3591.473 | 333.7676 | 4228.863 | 607.2789 | 142.4048 | 105.9258 | 222.5517 |

|          |          |          |          |          |          |          |          |          |          |
|----------|----------|----------|----------|----------|----------|----------|----------|----------|----------|
| 5.702813 | 685.004  | 669.2587 | 3648.229 | 334.9201 | 4254.763 | 609.4348 | 144.7024 | 106.3386 | 222.9608 |
| 5.768335 | 688.3315 | 670.9517 | 3698.472 | 335.9174 | 4277.222 | 611.3    | 146.7376 | 106.6978 | 223.3168 |
| 5.821088 | 690.9535 | 672.8955 | 3738.943 | 336.7029 | 4294.987 | 612.7693 | 148.3777 | 106.9957 | 223.6122 |
| 5.871348 | 693.4189 | 674.5387 | 3777.521 | 337.4402 | 4311.67  | 614.1482 | 149.9419 | 107.2719 | 223.8859 |
| 5.931326 | 696.3198 | 676.2391 | 3823.583 | 338.3064 | 4331.274 | 615.7675 | 151.8104 | 107.5918 | 224.203  |
| 6.003786 | 699.7628 | 678.0638 | 3879.263 | 339.3327 | 4354.522 | 617.6857 | 154.0703 | 107.9677 | 224.5756 |
| 6.075567 | 703.1103 | 679.5428 | 3934.451 | 340.3286 | 4377.091 | 619.5466 | 156.3116 | 108.3271 | 224.9317 |
| 6.133774 | 705.7642 | 681.2707 | 3979.219 | 341.118  | 4395.044 | 621.0217 | 158.1308 | 108.6258 | 225.2278 |
| 6.18325  | 707.9815 | 682.9301 | 4017.282 | 341.7772 | 4410.066 | 622.2536 | 159.6782 | 108.8809 | 225.4807 |
| 6.237125 | 710.3672 | 684.4014 | 4058.745 | 342.4856 | 4426.195 | 623.5768 | 161.3646 | 109.1485 | 225.7459 |
| 6.30415  | 713.2883 | 686.029  | 4110.344 | 343.3519 | 4445.924 | 625.1946 | 163.4644 | 109.4728 | 226.0674 |
| 6.379001 | 716.492  | 687.5109 | 4167.99  | 344.3008 | 4467.527 | 626.9661 | 165.8117 | 109.8224 | 226.4138 |
| 6.431148 | 718.6732 | 689.0791 | 4208.155 | 344.9471 | 4482.295 | 628.173  | 167.4481 | 110.0742 | 226.6635 |
| 6.483294 | 720.8263 | 690.4477 | 4248.328 | 345.5845 | 4496.852 | 629.3629 | 169.0856 | 110.3192 | 226.9062 |
| 6.548205 | 723.4665 | 691.9353 | 4298.345 | 346.3655 | 4514.68  | 630.8204 | 171.1254 | 110.6158 | 227.2002 |
| 6.623257 | 726.4654 | 693.3486 | 4356.189 | 347.2519 | 4534.899 | 632.474  | 173.4857 | 110.9472 | 227.5287 |
| 6.676833 | 728.559  | 694.7924 | 4397.481 | 347.871  | 4549.063 | 633.6293 | 175.1717 | 111.1902 | 227.7696 |
| 6.730408 | 730.624  | 696.094  | 4438.777 | 348.4814 | 4563.018 | 634.7679 | 176.8585 | 111.4276 | 228.0048 |
| 6.795401 | 733.0914 | 697.4749 | 4488.877 | 349.2104 | 4579.673 | 636.1275 | 178.9061 | 111.7079 | 228.2827 |
| 6.868752 | 735.8281 | 698.7606 | 4545.424 | 350.0185 | 4598.116 | 637.6341 | 181.2186 | 112.0141 | 228.5862 |
| 6.935359 | 738.2663 | 699.8677 | 4596.773 | 350.7385 | 4614.542 | 638.976  | 183.3197 | 112.287  | 228.8567 |
| 6.989392 | 740.1993 | 701.3598 | 4638.421 | 351.31   | 4627.629 | 640.0417 | 185.0249 | 112.5188 | 229.0864 |
| 7.039779 | 741.9783 | 702.6226 | 4677.259 | 351.836  | 4639.66  | 641.0221 | 186.6157 | 112.73   | 229.2958 |
| 7.098596 | 744.0289 | 703.833  | 4722.592 | 352.442  | 4653.499 | 642.1514 | 188.4734 | 112.9684 | 229.5321 |
| 7.169737 | 746.4688 | 705.0917 | 4777.419 | 353.1631 | 4669.945 | 643.4948 | 190.7215 | 113.2489 | 229.81   |
| 7.241879 | 748.9011 | 706.0502 | 4833.012 | 353.8818 | 4686.303 | 644.8331 | 193.0025 | 113.5225 | 230.0813 |
| 7.301493 | 750.8659 | 707.2873 | 4878.94  | 354.4633 | 4699.567 | 645.9161 | 194.8879 | 113.7556 | 230.3123 |
| 7.351687 | 752.4896 | 708.6233 | 4917.6   | 354.9444 | 4710.559 | 646.8123 | 196.4759 | 113.9563 | 230.5113 |
| 7.404911 | 754.1933 | 709.7207 | 4958.591 | 355.449  | 4722.059 | 647.752  | 198.1602 | 114.1603 | 230.7135 |
| 7.470525 | 756.2638 | 710.8721 | 5009.114 | 356.0624 | 4736.013 | 648.8938 | 200.2374 | 114.4049 | 230.9558 |
| 7.544892 | 758.5722 | 711.8775 | 5066.362 | 356.7465 | 4751.536 | 650.1667 | 202.5926 | 114.6721 | 231.2207 |
| 7.598163 | 760.1878 | 713.0752 | 5107.356 | 357.2262 | 4762.452 | 651.0597 | 204.28   | 114.8717 | 231.4186 |
| 7.651433 | 761.7832 | 714.1198 | 5148.34  | 357.7001 | 4773.216 | 651.9416 | 205.9678 | 115.0663 | 231.6114 |
| 7.716282 | 763.6987 | 715.1924 | 5198.218 | 358.2693 | 4786.116 | 653.0004 | 208.023  | 115.2964 | 231.8395 |

|          |          |          |          |          |          |          |          |          |          |
|----------|----------|----------|----------|----------|----------|----------|----------|----------|----------|
| 7.789873 | 765.8377 | 716.1362 | 5254.802 | 358.9053 | 4800.492 | 654.1831 | 210.3559 | 115.5486 | 232.0894 |
| 7.856813 | 767.7488 | 716.9215 | 5306.252 | 359.474  | 4813.326 | 655.2404 | 212.4785 | 115.7736 | 232.3125 |
| 7.910872 | 769.2546 | 718.1944 | 5347.781 | 359.9234 | 4823.507 | 656.0764 | 214.1927 | 115.9674 | 232.5046 |
| 7.96101  | 770.6343 | 719.2514 | 5386.286 | 360.3355 | 4832.823 | 656.8426 | 215.7828 | 116.143  | 232.6786 |
| 8.019551 | 772.2277 | 720.213  | 5431.23  | 360.8114 | 4843.55  | 657.7274 | 217.6398 | 116.3403 | 232.8742 |
| 8.090685 | 774.1349 | 721.1792 | 5485.82  | 361.3816 | 4856.368 | 658.787  | 219.8966 | 116.5733 | 233.1051 |
| 8.163165 | 776.0485 | 721.834  | 5541.416 | 361.9541 | 4869.191 | 659.8504 | 222.1964 | 116.8007 | 233.3305 |
| 8.223008 | 777.5923 | 722.8303 | 5587.294 | 362.4172 | 4879.585 | 660.7109 | 224.0954 | 116.9963 | 233.5244 |
| 8.273107 | 778.8597 | 723.9948 | 5625.682 | 362.7983 | 4888.153 | 661.4192 | 225.6851 | 117.166  | 233.6925 |
| 8.326036 | 780.1874 | 724.8951 | 5666.224 | 363.1976 | 4897.092 | 662.161  | 227.3648 | 117.3366 | 233.8617 |
| 8.391436 | 781.807  | 725.8044 | 5716.296 | 363.6851 | 4907.974 | 663.0662 | 229.4405 | 117.5412 | 234.0645 |
| 8.465969 | 783.6258 | 726.5418 | 5773.329 | 364.233  | 4920.16  | 664.0834 | 231.8062 | 117.7654 | 234.2867 |
| 8.51934  | 784.8973 | 727.5539 | 5814.142 | 364.6174 | 4928.731 | 664.7972 | 233.5001 | 117.935  | 234.4547 |
| 8.572711 | 786.1545 | 728.4179 | 5854.936 | 364.9978 | 4937.189 | 665.5034 | 235.194  | 118.1    | 234.6183 |
| 8.637594 | 787.664  | 729.2714 | 5904.505 | 365.4549 | 4947.321 | 666.3518 | 237.2533 | 118.2946 | 234.8112 |
| 8.711092 | 789.3496 | 729.9677 | 5960.62  | 365.966  | 4958.605 | 667.2999 | 239.5861 | 118.507  | 235.0217 |
| 8.777921 | 790.8568 | 730.5391 | 6011.61  | 366.4238 | 4968.686 | 668.149  | 241.7072 | 118.6967 | 235.2098 |
| 8.83198  | 792.0448 | 731.6469 | 6052.826 | 366.7861 | 4976.7   | 668.8216 | 243.4226 | 118.863  | 235.3745 |
| 8.882207 | 793.1366 | 732.5527 | 6091.102 | 367.1196 | 4984.052 | 669.4402 | 245.0164 | 119.0136 | 235.5239 |
| 8.940835 | 794.3994 | 733.3389 | 6135.756 | 367.5054 | 4992.524 | 670.1557 | 246.8767 | 119.1823 | 235.6911 |
| 9.011958 | 795.9108 | 734.0921 | 6189.892 | 367.9678 | 5002.643 | 671.0131 | 249.1334 | 119.3808 | 235.8878 |
| 9.084316 | 797.4283 | 734.5337 | 6244.929 | 368.4326 | 5012.763 | 671.8745 | 251.4291 | 119.5737 | 236.079  |
| 9.144088 | 798.6524 | 735.3676 | 6290.355 | 368.809  | 5020.976 | 672.5723 | 253.325  | 119.7418 | 236.2456 |
| 9.194227 | 799.6589 | 736.3973 | 6328.434 | 369.1196 | 5027.765 | 673.1484 | 254.9151 | 119.889  | 236.3915 |
| 9.247256 | 800.7167 | 737.1566 | 6368.688 | 369.4461 | 5034.863 | 673.7535 | 256.5968 | 120.0365 | 236.5377 |
| 9.31272  | 802.0082 | 737.8923 | 6418.348 | 369.8451 | 5043.505 | 674.4929 | 258.6726 | 120.2128 | 236.7125 |
| 9.387185 | 803.4587 | 738.431  | 6474.794 | 370.2939 | 5053.178 | 675.3241 | 261.0335 | 120.4051 | 236.903  |
| 9.440529 | 804.4722 | 739.3143 | 6515.194 | 370.609  | 5059.989 | 675.9079 | 262.7243 | 120.5525 | 237.0492 |
| 9.493872 | 805.476  | 740.0485 | 6555.569 | 370.9214 | 5066.717 | 676.4865 | 264.4148 | 120.6957 | 237.1911 |
| 9.558741 | 806.6836 | 740.7445 | 6604.635 | 371.2976 | 5074.789 | 677.1834 | 266.4703 | 120.8644 | 237.3583 |
| 9.632259 | 808.0357 | 741.2628 | 6660.196 | 371.7195 | 5083.795 | 677.9643 | 268.7994 | 121.048  | 237.5403 |
| 9.699117 | 809.2466 | 741.6737 | 6710.681 | 372.0982 | 5091.853 | 678.6652 | 270.9171 | 121.2122 | 237.703  |
| 9.753179 | 810.1991 | 742.6664 | 6751.466 | 372.3979 | 5098.261 | 679.2201 | 272.6288 | 121.3584 | 237.8479 |
| 9.803384 | 811.0755 | 743.4653 | 6789.318 | 372.6739 | 5104.142 | 679.7312 | 274.2182 | 121.4907 | 237.979  |

|          |          |          |          |          |          |          |          |          |          |
|----------|----------|----------|----------|----------|----------|----------|----------|----------|----------|
| 9.861987 | 812.0912 | 744.1244 | 6833.472 | 372.994  | 5110.929 | 680.3236 | 276.0731 | 121.6382 | 238.1252 |
| 9.933108 | 813.3098 | 744.7246 | 6887.013 | 373.3786 | 5119.047 | 681.0352 | 278.3237 | 121.8115 | 238.297  |
| 10.00549 | 814.5368 | 745.009  | 6941.458 | 373.7664 | 5127.184 | 681.7522 | 280.6138 | 121.9794 | 238.4634 |
| 10.06529 | 815.5259 | 745.7221 | 6986.386 | 374.0806 | 5133.793 | 682.3335 | 282.5047 | 122.1274 | 238.6101 |
| 10.11542 | 816.3384 | 746.6591 | 7024.024 | 374.3399 | 5139.257 | 682.8133 | 284.0896 | 122.2581 | 238.7396 |
| 10.16842 | 817.1942 | 747.3166 | 7063.794 | 374.6129 | 5144.976 | 683.3184 | 285.7651 | 122.3883 | 238.8687 |
| 10.23387 | 818.2412 | 747.9264 | 7112.86  | 374.9474 | 5151.949 | 683.9368 | 287.8333 | 122.5436 | 239.0227 |
| 10.30834 | 819.4207 | 748.3217 | 7168.646 | 375.3247 | 5159.771 | 684.6341 | 290.1862 | 122.7126 | 239.1902 |
| 10.3617  | 820.2439 | 749.1106 | 7208.568 | 375.5896 | 5165.283 | 685.124  | 291.871  | 122.8438 | 239.3202 |
| 10.41505 | 821.0606 | 749.7505 | 7248.461 | 375.8527 | 5170.734 | 685.6105 | 293.5555 | 122.971  | 239.4463 |
| 10.47992 | 822.0451 | 750.3318 | 7296.929 | 376.1703 | 5177.283 | 686.1973 | 295.603  | 123.1205 | 239.5945 |
| 10.55343 | 823.1499 | 750.7197 | 7351.796 | 376.5271 | 5184.6   | 686.8565 | 297.9224 | 123.2829 | 239.7554 |
| 10.62028 | 824.141  | 751.0148 | 7401.641 | 376.8481 | 5191.156 | 687.4493 | 300.0309 | 123.4281 | 239.8994 |
| 10.67434 | 824.9192 | 751.9233 | 7441.91  | 377.102  | 5196.374 | 687.9185 | 301.7352 | 123.5594 | 240.0295 |
| 10.72455 | 825.6365 | 752.644  | 7479.286 | 377.3363 | 5201.17  | 688.3515 | 303.3178 | 123.6781 | 240.1472 |
| 10.78316 | 826.4699 | 753.2105 | 7522.879 | 377.6086 | 5206.711 | 688.8545 | 305.1647 | 123.81   | 240.2779 |
| 10.85428 | 827.4719 | 753.6982 | 7575.725 | 377.9365 | 5213.35  | 689.4598 | 307.4048 | 123.9647 | 240.4312 |
| 10.92666 | 828.4833 | 753.8675 | 7629.448 | 378.2678 | 5220.014 | 690.0712 | 309.6836 | 124.1139 | 240.579  |
| 10.98644 | 829.2981 | 754.4935 | 7673.777 | 378.5364 | 5225.433 | 690.5672 | 311.5651 | 124.2469 | 240.7109 |
| 11.03658 | 829.9671 | 755.362  | 7710.917 | 378.7581 | 5229.918 | 690.9767 | 313.1422 | 124.3653 | 240.8283 |
| 11.08959 | 830.6739 | 755.9449 | 7750.161 | 378.9922 | 5234.619 | 691.4089 | 314.8095 | 124.4827 | 240.9446 |
| 11.15504 | 831.5404 | 756.4623 | 7798.57  | 379.2795 | 5240.36  | 691.9391 | 316.8673 | 124.6225 | 241.0832 |
| 11.22951 | 832.5189 | 756.7514 | 7853.59  | 379.6043 | 5246.809 | 692.5381 | 319.2076 | 124.774  | 241.2334 |
| 11.28286 | 833.201  | 757.4718 | 7892.963 | 379.8323 | 5251.358 | 692.9591 | 320.8833 | 124.8931 | 241.3514 |
| 11.33621 | 833.8792 | 758.0427 | 7932.303 | 380.0593 | 5255.863 | 693.3779 | 322.5584 | 125.0084 | 241.4656 |
| 11.40108 | 834.6984 | 758.5395 | 7980.096 | 380.3337 | 5261.283 | 693.8841 | 324.5946 | 125.1436 | 241.5996 |
| 11.47459 | 835.6202 | 758.8311 | 8034.196 | 380.6428 | 5267.351 | 694.454  | 326.9009 | 125.2899 | 241.7447 |
| 11.54144 | 836.4487 | 759.0399 | 8083.34  | 380.9213 | 5272.796 | 694.9674 | 328.9973 | 125.421  | 241.8746 |
| 11.59551 | 837.0977 | 759.8873 | 8123.038 | 381.1415 | 5277.133 | 695.3737 | 330.6918 | 125.5412 | 241.9937 |
| 11.64572 | 837.6971 | 760.5509 | 8159.879 | 381.3451 | 5281.124 | 695.7491 | 332.265  | 125.6497 | 242.1013 |
| 11.70433 | 838.3954 | 761.0491 | 8202.846 | 381.5821 | 5285.743 | 696.1862 | 334.1007 | 125.7698 | 242.2203 |
| 11.77545 | 839.2367 | 761.4537 | 8254.93  | 381.8681 | 5291.285 | 696.7133 | 336.3272 | 125.9104 | 242.3597 |
| 11.84782 | 840.0886 | 761.5371 | 8307.874 | 382.1579 | 5296.86  | 697.2469 | 338.592  | 126.0456 | 242.4937 |
| 11.90761 | 840.7743 | 762.0985 | 8351.555 | 382.3928 | 5301.397 | 697.6799 | 340.4617 | 126.1673 | 242.6143 |

|          |          |          |          |          |          |          |          |          |          |
|----------|----------|----------|----------|----------|----------|----------|----------|----------|----------|
| 11.95774 | 841.3368 | 762.9174 | 8388.15  | 382.5868 | 5305.156 | 698.0376 | 342.0289 | 126.2765 | 242.7226 |
| 12.01076 | 841.933  | 763.4454 | 8426.815 | 382.792  | 5309.103 | 698.4159 | 343.6855 | 126.3842 | 242.8293 |
| 12.07621 | 842.6655 | 763.8943 | 8474.505 | 383.0444 | 5313.929 | 698.8808 | 345.7299 | 126.5122 | 242.9562 |
| 12.15068 | 843.4951 | 764.1044 | 8528.706 | 383.3303 | 5319.361 | 699.4072 | 348.0549 | 126.6505 | 243.0933 |
| 12.20403 | 844.0727 | 764.7742 | 8567.489 | 383.5311 | 5323.196 | 699.7772 | 349.7195 | 126.7604 | 243.2022 |
| 12.25738 | 844.648  | 765.2941 | 8606.238 | 383.7312 | 5327     | 700.1459 | 351.3835 | 126.8667 | 243.3075 |
| 12.32225 | 845.3446 | 765.7282 | 8653.309 | 383.9737 | 5331.583 | 700.5923 | 353.406  | 126.991  | 243.4308 |
| 12.39576 | 846.1305 | 765.9477 | 8706.588 | 384.2473 | 5336.724 | 701.096  | 355.6966 | 127.1253 | 243.5638 |
| 12.46261 | 846.8383 | 766.092  | 8754.981 | 384.4943 | 5341.345 | 701.5505 | 357.7785 | 127.2455 | 243.683  |
| 12.51667 | 847.3914 | 766.8944 | 8794.071 | 384.6895 | 5345.027 | 701.91   | 359.4611 | 127.3573 | 243.7938 |
| 12.56688 | 847.9032 | 767.5159 | 8830.346 | 384.8702 | 5348.421 | 702.2428 | 361.0233 | 127.458  | 243.8936 |
| 12.6255  | 848.501  | 767.9633 | 8872.65  | 385.081  | 5352.355 | 702.6308 | 362.846  | 127.5692 | 244.0038 |
| 12.69661 | 849.2231 | 768.3057 | 8923.926 | 385.3358 | 5357.083 | 703.0997 | 365.0567 | 127.6991 | 244.1326 |
| 12.76899 | 849.9564 | 768.3243 | 8976.045 | 385.5945 | 5361.849 | 703.5754 | 367.3051 | 127.8234 | 244.2558 |
| 12.82877 | 850.5461 | 768.8378 | 9019.044 | 385.8043 | 5365.732 | 703.9615 | 369.1612 | 127.9365 | 244.3679 |
| 12.87891 | 851.0294 | 769.6201 | 9055.064 | 385.9776 | 5368.951 | 704.2806 | 370.7169 | 128.0387 | 244.4692 |
| 12.93192 | 851.5433 | 770.1071 | 9093.122 | 386.1613 | 5372.336 | 704.6186 | 372.3614 | 128.139  | 244.5686 |
| 12.99738 | 852.1762 | 770.5047 | 9140.06  | 386.3876 | 5376.483 | 705.0348 | 374.3906 | 128.258  | 244.6865 |
| 13.07185 | 852.8949 | 770.6551 | 9193.402 | 386.6445 | 5381.159 | 705.507  | 376.6982 | 128.3862 | 244.8136 |
| 13.1252  | 853.3945 | 771.2875 | 9231.568 | 386.8248 | 5384.463 | 705.8389 | 378.3503 | 128.489  | 244.9155 |
| 13.17855 | 853.8933 | 771.7693 | 9269.699 | 387.0048 | 5387.745 | 706.17   | 380.0016 | 128.5883 | 245.0139 |
| 13.24342 | 854.4986 | 772.1562 | 9316.017 | 387.2233 | 5391.705 | 706.5717 | 382.0086 | 128.7043 | 245.1289 |
| 13.31693 | 855.1833 | 772.3213 | 9368.441 | 387.4704 | 5396.155 | 707.0257 | 384.2816 | 128.8292 | 245.2527 |
| 13.38378 | 855.801  | 772.4166 | 9416.055 | 387.6937 | 5400.163 | 707.4361 | 386.3474 | 128.9411 | 245.3636 |
| 13.43784 | 856.2825 | 773.1858 | 9454.513 | 387.87   | 5403.358 | 707.7605 | 388.0169 | 129.0463 | 245.4679 |
| 13.48805 | 856.729  | 773.7759 | 9490.2   | 388.0335 | 5406.307 | 708.0612 | 389.5668 | 129.1411 | 245.5618 |
| 13.54666 | 857.2519 | 774.185  | 9531.818 | 388.2246 | 5409.73  | 708.4124 | 391.3752 | 129.2453 | 245.6651 |
| 13.61778 | 857.8849 | 774.4804 | 9582.26  | 388.456  | 5413.852 | 708.8374 | 393.5683 | 129.3669 | 245.7856 |
| 13.69016 | 858.5297 | 774.4495 | 9633.528 | 388.6913 | 5418.013 | 709.2696 | 395.7988 | 129.4829 | 245.9006 |
| 13.74995 | 859.0477 | 774.9268 | 9675.822 | 388.8822 | 5421.408 | 709.6204 | 397.64   | 129.5893 | 246.0061 |
| 13.80008 | 859.4718 | 775.6821 | 9711.251 | 389.0398 | 5424.224 | 709.9102 | 399.1832 | 129.686  | 246.1019 |
| 13.8531  | 859.9241 | 776.1384 | 9748.682 | 389.2072 | 5427.191 | 710.2179 | 400.8143 | 129.7805 | 246.1956 |
| 13.91855 | 860.4825 | 776.4971 | 9794.846 | 389.4138 | 5430.83  | 710.5973 | 402.827  | 129.8924 | 246.3065 |
| 13.99302 | 861.1183 | 776.6019 | 9847.306 | 389.6487 | 5434.94  | 711.0285 | 405.1157 | 130.0127 | 246.4257 |

|          |          |          |          |          |          |          |          |          |          |
|----------|----------|----------|----------|----------|----------|----------|----------|----------|----------|
| 14.04637 | 861.5595 | 777.2062 | 9884.839 | 389.8136 | 5437.848 | 711.3316 | 406.7542 | 130.1101 | 246.5222 |
| 14.09972 | 862.001  | 777.6592 | 9922.336 | 389.9784 | 5440.739 | 711.6343 | 408.3919 | 130.2039 | 246.6152 |
| 14.16459 | 862.5378 | 778.0103 | 9967.884 | 390.1787 | 5444.234 | 712.0021 | 410.3822 | 130.3133 | 246.7237 |
| 14.2381  | 863.1466 | 778.1335 | 10019.43 | 390.4055 | 5448.168 | 712.4185 | 412.6363 | 130.4309 | 246.8402 |
| 14.30495 | 863.6968 | 778.1912 | 10066.25 | 390.6109 | 5451.715 | 712.7953 | 414.6847 | 130.5362 | 246.9446 |
| 14.35901 | 864.1247 | 778.9356 | 10104.06 | 390.7729 | 5454.546 | 713.093  | 416.3401 | 130.6363 | 247.0438 |
| 14.40923 | 864.5221 | 779.5021 | 10139.15 | 390.9233 | 5457.161 | 713.3693 | 417.877  | 130.7263 | 247.1331 |
| 14.46784 | 864.9888 | 779.8821 | 10180.07 | 391.0994 | 5460.201 | 713.6926 | 419.67   | 130.8251 | 247.2309 |
| 14.53896 | 865.5549 | 780.1413 | 10229.66 | 391.3128 | 5463.868 | 714.0843 | 421.8445 | 130.9401 | 247.3449 |
| 14.61133 | 866.1331 | 780.072  | 10280.06 | 391.5303 | 5467.576 | 714.4831 | 424.0559 | 131.0495 | 247.4534 |
| 14.67112 | 866.5971 | 780.5218 | 10321.64 | 391.7067 | 5470.604 | 714.807  | 425.8813 | 131.1506 | 247.5536 |
| 14.72125 | 866.9767 | 781.257  | 10356.47 | 391.8524 | 5473.118 | 715.0746 | 427.4111 | 131.243  | 247.6452 |
| 14.77427 | 867.3827 | 781.6899 | 10393.26 | 392.0074 | 5475.769 | 715.3591 | 429.0281 | 131.333  | 247.7343 |
| 14.83972 | 867.8849 | 782.0186 | 10438.64 | 392.1988 | 5479.027 | 715.7103 | 431.0234 | 131.4393 | 247.8397 |
| 14.91419 | 868.4581 | 782.088  | 10490.21 | 392.4168 | 5482.713 | 716.1101 | 433.2922 | 131.5532 | 247.9526 |
| 14.96754 | 868.8554 | 782.6711 | 10527.1  | 392.5699 | 5485.321 | 716.3911 | 434.9163 | 131.6462 | 248.0448 |
| 15.02089 | 869.2536 | 783.1021 | 10563.96 | 392.723  | 5487.919 | 716.6721 | 436.5396 | 131.7357 | 248.1335 |
| 15.08577 | 869.7388 | 783.4256 | 10608.72 | 392.9093 | 5491.063 | 717.0138 | 438.5125 | 131.8399 | 248.2368 |
| 15.15928 | 870.2903 | 783.5162 | 10659.39 | 393.1206 | 5494.607 | 717.4013 | 440.7466 | 131.9516 | 248.3475 |
| 15.22613 | 870.7894 | 783.5444 | 10705.4  | 393.3121 | 5497.808 | 717.7523 | 442.7769 | 132.0516 | 248.4466 |
| 15.28019 | 871.1767 | 784.2702 | 10742.56 | 393.4631 | 5500.363 | 718.0295 | 444.4176 | 132.1476 | 248.5418 |
| 15.3304  | 871.537  | 784.8188 | 10777.05 | 393.6034 | 5502.726 | 718.287  | 445.9407 | 132.2339 | 248.6273 |
| 15.38902 | 871.961  | 785.1763 | 10817.26 | 393.7678 | 5505.478 | 718.5886 | 447.7178 | 132.3282 | 248.7208 |
| 15.46014 | 872.4764 | 785.4073 | 10865.99 | 393.9674 | 5508.8   | 718.9545 | 449.8727 | 132.438  | 248.8296 |
| 15.53251 | 873.0041 | 785.3077 | 10915.52 | 394.1712 | 5512.166 | 719.3277 | 452.0642 | 132.542  | 248.9327 |
| 15.5923  | 873.4272 | 785.7362 | 10956.38 | 394.3363 | 5514.915 | 719.6307 | 453.8731 | 132.6388 | 249.0287 |
| 15.64243 | 873.773  | 786.4563 | 10990.6  | 394.4727 | 5517.2   | 719.881  | 455.3891 | 132.7277 | 249.1168 |
| 15.69545 | 874.1438 | 786.871  | 11026.76 | 394.618  | 5519.613 | 720.1475 | 456.9915 | 132.814  | 249.2023 |
| 15.7609  | 874.6033 | 787.1765 | 11071.35 | 394.7977 | 5522.581 | 720.4768 | 458.9686 | 132.9158 | 249.3032 |
| 15.83537 | 875.129  | 787.2178 | 11122.01 | 395.0026 | 5525.944 | 720.8523 | 461.2167 | 133.0246 | 249.411  |
| 15.88873 | 875.4928 | 787.7846 | 11158.26 | 395.1464 | 5528.326 | 721.116  | 462.826  | 133.114  | 249.4997 |
| 15.94208 | 875.858  | 788.1987 | 11194.47 | 395.2904 | 5530.7   | 721.3801 | 464.4344 | 133.2    | 249.5849 |
| 16.00695 | 876.3038 | 788.5006 | 11238.46 | 395.4658 | 5533.578 | 721.7015 | 466.3891 | 133.2999 | 249.6839 |
| 16.08046 | 876.8116 | 788.5653 | 11288.24 | 395.665  | 5536.825 | 722.0664 | 468.6027 | 133.4068 | 249.7898 |



|          |          |          |          |          |          |          |          |          |          |
|----------|----------|----------|----------|----------|----------|----------|----------|----------|----------|
| 16.14731 | 877.2718 | 788.5701 | 11333.44 | 395.8456 | 5539.762 | 722.3973 | 470.6142 | 133.5025 | 249.8847 |
| 16.20137 | 877.628  | 789.2816 | 11369.95 | 395.988  | 5542.107 | 722.6584 | 472.2397 | 133.5952 | 249.9766 |
| 16.25159 | 877.9599 | 789.8164 | 11403.83 | 396.1203 | 5544.279 | 722.9011 | 473.7488 | 133.6783 | 250.059  |
| 16.3102  | 878.3513 | 790.1562 | 11443.34 | 396.2757 | 5546.809 | 723.1858 | 475.5093 | 133.7691 | 250.1489 |
| 16.38132 | 878.8279 | 790.3649 | 11491.21 | 396.4644 | 5549.869 | 723.5315 | 477.6442 | 133.8745 | 250.2534 |
| 16.4537  | 879.3169 | 790.2409 | 11539.87 | 396.6572 | 5552.972 | 723.8845 | 479.8152 | 133.9741 | 250.3521 |
| 16.51348 | 879.7085 | 790.6527 | 11580    | 396.8136 | 5555.51  | 724.171  | 481.6072 | 134.0674 | 250.4446 |
| 16.56362 | 880.0283 | 791.3612 | 11613.62 | 396.9426 | 5557.619 | 724.4077 | 483.109  | 134.1534 | 250.5299 |
| 16.61664 | 880.3721 | 791.7618 | 11649.14 | 397.0803 | 5559.849 | 724.66   | 484.6963 | 134.2366 | 250.6123 |
| 16.68209 | 880.7987 | 792.0488 | 11692.94 | 397.2507 | 5562.596 | 724.9721 | 486.6548 | 134.3346 | 250.7095 |
| 16.75656 | 881.2879 | 792.0675 | 11742.71 | 397.4452 | 5565.711 | 725.3283 | 488.8817 | 134.4392 | 250.8131 |
| 16.80991 | 881.6259 | 792.6216 | 11778.32 | 397.5817 | 5567.919 | 725.5784 | 490.4758 | 134.5257 | 250.8988 |
| 16.86326 | 881.9656 | 793.0223 | 11813.89 | 397.7184 | 5570.121 | 725.829  | 492.0691 | 134.6087 | 250.9811 |
| 16.92814 | 882.381  | 793.3069 | 11857.09 | 397.8851 | 5572.793 | 726.1343 | 494.0052 | 134.705  | 251.0766 |
| 17.00165 | 882.855  | 793.3507 | 11905.98 | 398.0747 | 5575.813 | 726.4813 | 496.1977 | 134.8079 | 251.1786 |
| 17.0685  | 883.2851 | 793.3365 | 11950.39 | 398.2467 | 5578.546 | 726.7961 | 498.1901 | 134.9    | 251.2699 |
| 17.12256 | 883.6172 | 794.0369 | 11986.25 | 398.3821 | 5580.729 | 727.0444 | 499.8002 | 134.9899 | 251.359  |
| 17.17278 | 883.9272 | 794.5609 | 12019.52 | 398.5081 | 5582.752 | 727.2753 | 501.2948 | 135.0705 | 251.4388 |
| 17.23139 | 884.2933 | 794.8867 | 12058.32 | 398.6561 | 5585.113 | 727.5465 | 503.0385 | 135.1582 | 251.5257 |
| 17.30251 | 884.7397 | 795.0773 | 12105.34 | 398.8361 | 5587.969 | 727.876  | 505.1529 | 135.2599 | 251.6266 |
| 17.37489 | 885.1987 | 794.9332 | 12153.13 | 399.0203 | 5590.87  | 728.2128 | 507.3031 | 135.3558 | 251.7216 |
| 17.43467 | 885.5659 | 795.3317 | 12192.55 | 399.1695 | 5593.242 | 728.4862 | 509.0779 | 135.4461 | 251.8112 |
| 17.48481 | 885.8654 | 796.0312 | 12225.57 | 399.2926 | 5595.216 | 728.7119 | 510.5653 | 135.5297 | 251.894  |
| 17.53783 | 886.1881 | 796.4205 | 12260.45 | 399.4242 | 5597.304 | 728.9528 | 512.1373 | 135.6103 | 251.9739 |
| 17.60328 | 886.5892 | 796.6925 | 12303.47 | 399.5871 | 5599.878 | 729.251  | 514.0769 | 135.7052 | 252.0679 |
| 17.67775 | 887.0498 | 796.6927 | 12352.35 | 399.7732 | 5602.801 | 729.5917 | 516.2822 | 135.8061 | 252.1679 |
| 17.73111 | 887.3675 | 797.2368 | 12387.32 | 399.9037 | 5604.873 | 729.8308 | 517.8609 | 135.8901 | 252.2512 |
| 17.78446 | 887.6874 | 797.6267 | 12422.25 | 400.0346 | 5606.942 | 730.0705 | 519.4387 | 135.9706 | 252.331  |
| 17.84933 | 888.079  | 797.8971 | 12464.68 | 400.1943 | 5609.453 | 730.3628 | 521.3561 | 136.0639 | 252.4235 |
| 17.92284 | 888.5265 | 797.9237 | 12512.69 | 400.376  | 5612.294 | 730.6951 | 523.5272 | 136.1634 | 252.5221 |
| 17.98969 | 888.933  | 797.8937 | 12556.29 | 400.5409 | 5614.869 | 730.9969 | 525.5001 | 136.2524 | 252.6103 |
| 18.04376 | 889.2462 | 798.5855 | 12591.51 | 400.6707 | 5616.925 | 731.2348 | 527.0945 | 136.3399 | 252.697  |
| 18.09397 | 889.5388 | 799.1009 | 12624.19 | 400.7916 | 5618.832 | 731.4562 | 528.5746 | 136.4182 | 252.7747 |
| 18.15259 | 889.885  | 799.4151 | 12662.29 | 400.9337 | 5621.058 | 731.7163 | 530.3013 | 136.5033 | 252.859  |

|          |          |          |          |          |          |          |          |          |          |
|----------|----------|----------|----------|----------|----------|----------|----------|----------|----------|
| 18.22371 | 890.3077 | 799.5908 | 12708.47 | 401.1065 | 5623.755 | 732.0326 | 532.3949 | 136.6019 | 252.9567 |
| 18.29608 | 890.7429 | 799.4299 | 12755.39 | 401.2835 | 5626.496 | 732.3562 | 534.524  | 136.6946 | 253.0486 |
| 18.35587 | 891.0908 | 799.8174 | 12794.1  | 401.4269 | 5628.74  | 732.6187 | 536.2814 | 136.7824 | 253.1356 |
| 18.40601 | 891.3743 | 800.51   | 12826.53 | 401.5452 | 5630.606 | 732.8356 | 537.7542 | 136.8638 | 253.2163 |
| 18.45903 | 891.6803 | 800.8901 | 12860.78 | 401.6717 | 5632.582 | 733.0671 | 539.3107 | 136.9422 | 253.294  |
| 18.52448 | 892.0611 | 801.1496 | 12903.02 | 401.8284 | 5635.02  | 733.3539 | 541.2312 | 137.0343 | 253.3853 |
| 18.59895 | 892.4989 | 801.1342 | 12951.01 | 402.0077 | 5637.791 | 733.6817 | 543.4147 | 137.1321 | 253.4822 |
| 18.6523  | 892.8007 | 801.6702 | 12985.35 | 402.1333 | 5639.755 | 733.9117 | 544.9778 | 137.2139 | 253.5633 |
| 18.70566 | 893.1047 | 802.0513 | 13019.65 | 402.2593 | 5641.718 | 734.1424 | 546.5401 | 137.2923 | 253.641  |
| 18.77053 | 893.4773 | 802.31   | 13061.31 | 402.4131 | 5644.103 | 734.4239 | 548.4385 | 137.3829 | 253.7308 |
| 18.84404 | 893.9037 | 802.3219 | 13108.46 | 402.5883 | 5646.802 | 734.7443 | 550.588  | 137.4794 | 253.8264 |
| 18.91089 | 894.2912 | 802.2786 | 13151.27 | 402.7474 | 5649.25  | 735.0352 | 552.5414 | 137.5657 | 253.912  |
| 18.96496 | 894.5893 | 802.9635 | 13185.85 | 402.8725 | 5651.205 | 735.2644 | 554.12   | 137.6511 | 253.9966 |
| 19.01517 | 894.8681 | 803.4719 | 13217.94 | 402.9891 | 5653.02  | 735.4779 | 555.5854 | 137.7275 | 254.0724 |
| 19.07379 | 895.1983 | 803.7765 | 13255.35 | 403.1262 | 5655.139 | 735.7288 | 557.2949 | 137.8103 | 254.1544 |
| 19.14491 | 895.6019 | 803.9396 | 13300.68 | 403.2931 | 5657.708 | 736.0341 | 559.3677 | 137.9061 | 254.2494 |
| 19.21728 | 896.0181 | 803.7642 | 13346.76 | 403.4641 | 5660.322 | 736.3466 | 561.4755 | 137.996  | 254.3385 |
| 19.27707 | 896.3504 | 804.1426 | 13384.77 | 403.6026 | 5662.461 | 736.6001 | 563.2154 | 138.0815 | 254.4232 |
| 19.32721 | 896.621  | 804.8296 | 13416.6  | 403.7169 | 5664.241 | 736.8094 | 564.6734 | 138.1611 | 254.5022 |
| 19.38023 | 896.9135 | 805.202  | 13450.23 | 403.8391 | 5666.128 | 737.0331 | 566.2145 | 138.2375 | 254.5779 |
| 19.44568 | 897.2778 | 805.451  | 13491.7  | 403.9906 | 5668.456 | 737.3102 | 568.1157 | 138.3272 | 254.6667 |
| 19.52015 | 897.6974 | 805.4221 | 13538.83 | 404.164  | 5671.104 | 737.6273 | 570.2773 | 138.4221 | 254.7609 |
| 19.57351 | 897.9861 | 805.9515 | 13572.54 | 404.2855 | 5672.982 | 737.8496 | 571.8248 | 138.5021 | 254.8401 |
| 19.62686 | 898.2772 | 806.3252 | 13606.22 | 404.4074 | 5674.86  | 738.0728 | 573.3714 | 138.5785 | 254.9158 |
| 19.69174 | 898.6344 | 806.574  | 13647.12 | 404.5563 | 5677.141 | 738.3452 | 575.2507 | 138.6668 | 255.0034 |
| 19.76524 | 899.0436 | 806.5732 | 13693.41 | 404.726  | 5679.726 | 738.6553 | 577.3786 | 138.7605 | 255.0963 |
| 19.83209 | 899.4158 | 806.5183 | 13735.44 | 404.8801 | 5682.071 | 738.9371 | 579.3123 | 138.8445 | 255.1795 |
| 19.88616 | 899.7015 | 807.1975 | 13769.39 | 405.0012 | 5683.944 | 739.1589 | 580.875  | 138.928  | 255.2622 |
| 19.93638 | 899.9689 | 807.7002 | 13800.89 | 405.1141 | 5685.684 | 739.3656 | 582.3257 | 139.0027 | 255.3363 |
| 19.995   | 900.2861 | 807.9966 | 13837.62 | 405.247  | 5687.716 | 739.6087 | 584.0179 | 139.0834 | 255.4163 |
| 20.06612 | 900.674  | 808.1487 | 13882.13 | 405.4088 | 5690.181 | 739.9046 | 586.0698 | 139.1767 | 255.5088 |
| 20.13849 | 901.0746 | 807.9606 | 13927.36 | 405.5747 | 5692.691 | 740.2077 | 588.1562 | 139.2641 | 255.5954 |
| 20.19828 | 901.3941 | 808.3313 | 13964.68 | 405.709  | 5694.746 | 740.4534 | 589.8785 | 139.3475 | 255.6781 |
| 20.24842 | 901.654  | 809.0138 | 13995.93 | 405.8198 | 5696.455 | 740.6563 | 591.3219 | 139.4255 | 255.7554 |

|          |          |          |          |          |          |          |          |          |          |
|----------|----------|----------|----------|----------|----------|----------|----------|----------|----------|
| 20.30144 | 901.9354 | 809.3796 | 14028.95 | 405.9383 | 5698.268 | 740.8732 | 592.8473 | 139.5002 | 255.8294 |
| 20.36689 | 902.2862 | 809.6196 | 14069.67 | 406.0854 | 5700.506 | 741.1421 | 594.7293 | 139.5876 | 255.916  |
| 20.44136 | 902.6906 | 809.5789 | 14115.93 | 406.2538 | 5703.054 | 741.4499 | 596.8689 | 139.6801 | 256.0077 |
| 20.49472 | 902.9685 | 810.1026 | 14149.03 | 406.3716 | 5704.86  | 741.6656 | 598.4007 | 139.7582 | 256.0852 |
| 20.54808 | 903.249  | 810.47   | 14182.09 | 406.49   | 5706.667 | 741.8823 | 599.9316 | 139.8329 | 256.1592 |
| 20.61295 | 903.5934 | 810.7101 | 14222.24 | 406.6346 | 5708.864 | 742.1468 | 601.7918 | 139.9191 | 256.2446 |
| 20.68646 | 903.9883 | 810.6982 | 14267.68 | 406.7995 | 5711.354 | 742.448  | 603.898  | 140.0104 | 256.3351 |
| 20.75331 | 904.3476 | 810.633  | 14308.95 | 406.9494 | 5713.614 | 742.7219 | 605.812  | 140.0921 | 256.4161 |
| 20.80737 | 904.6231 | 811.3075 | 14342.28 | 407.067  | 5715.419 | 742.9373 | 607.3588 | 140.174  | 256.4972 |
| 20.8576  | 904.881  | 811.8053 | 14373.2  | 407.1767 | 5717.096 | 743.1381 | 608.7947 | 140.2471 | 256.5697 |
| 20.91621 | 905.1872 | 812.0945 | 14409.26 | 407.3059 | 5719.057 | 743.3743 | 610.4697 | 140.326  | 256.6479 |
| 20.98733 | 905.5621 | 812.237  | 14452.96 | 407.4632 | 5721.435 | 743.662  | 612.5005 | 140.417  | 256.7381 |
| 21.0597  | 905.9495 | 812.0376 | 14497.36 | 407.6246 | 5723.858 | 743.9569 | 614.5657 | 140.502  | 256.8224 |
| 21.11949 | 906.2583 | 812.4015 | 14533.99 | 407.7553 | 5725.841 | 744.1959 | 616.2703 | 140.5836 | 256.9033 |
| 21.16964 | 906.5093 | 813.0802 | 14564.68 | 407.863  | 5727.492 | 744.3931 | 617.6989 | 140.6601 | 256.9791 |
| 21.22266 | 906.7813 | 813.4403 | 14597.09 | 407.9783 | 5729.243 | 744.6041 | 619.2087 | 140.7331 | 257.0515 |
| 21.28811 | 907.1207 | 813.6723 | 14637.06 | 408.1214 | 5731.406 | 744.8658 | 621.0714 | 140.8185 | 257.1361 |
| 21.36258 | 907.5122 | 813.621  | 14682.47 | 408.2854 | 5733.868 | 745.1654 | 623.1891 | 140.9087 | 257.2254 |
| 21.41594 | 907.781  | 814.1399 | 14714.96 | 408.4001 | 5735.615 | 745.3753 | 624.7052 | 140.9853 | 257.3013 |
| 21.46929 | 908.0525 | 814.5017 | 14747.42 | 408.5153 | 5737.362 | 745.5862 | 626.2204 | 141.0583 | 257.3738 |
| 21.53417 | 908.386  | 814.7341 | 14786.84 | 408.6562 | 5739.488 | 745.8437 | 628.0615 | 141.1426 | 257.4573 |
| 21.60767 | 908.7688 | 814.7122 | 14831.44 | 408.8168 | 5741.898 | 746.1372 | 630.146  | 141.2316 | 257.5455 |
| 21.67452 | 909.1172 | 814.6376 | 14871.95 | 408.9629 | 5744.086 | 746.404  | 632.0403 | 141.3113 | 257.6245 |
| 21.72859 | 909.3838 | 815.3082 | 14904.67 | 409.0774 | 5745.833 | 746.6138 | 633.5712 | 141.3916 | 257.7041 |
| 21.77881 | 909.6336 | 815.8017 | 14935.03 | 409.1843 | 5747.457 | 746.8093 | 634.9923 | 141.4633 | 257.7751 |
| 21.83743 | 909.9305 | 816.0846 | 14970.43 | 409.3101 | 5749.356 | 747.0395 | 636.65   | 141.5404 | 257.8516 |
| 21.90855 | 910.2942 | 816.2185 | 15013.32 | 409.4635 | 5751.661 | 747.3199 | 638.6599 | 141.6294 | 257.9398 |
| 21.98092 | 910.6704 | 816.0086 | 15056.91 | 409.621  | 5754.01  | 747.6074 | 640.7037 | 141.7122 | 258.0219 |
| 22.04071 | 910.97   | 816.3665 | 15092.87 | 409.7483 | 5755.932 | 747.8404 | 642.3908 | 141.7921 | 258.1011 |
| 22.09086 | 911.2132 | 817.042  | 15122.99 | 409.8533 | 5757.533 | 748.0325 | 643.8047 | 141.8672 | 258.1755 |
| 22.14388 | 911.4772 | 817.3971 | 15154.81 | 409.9657 | 5759.231 | 748.2382 | 645.2989 | 141.9387 | 258.2464 |
| 22.20933 | 911.8067 | 817.6218 | 15194.04 | 410.1053 | 5761.329 | 748.4934 | 647.1423 | 142.0222 | 258.3291 |
| 22.2838  | 912.1872 | 817.5608 | 15238.62 | 410.2653 | 5763.719 | 748.7857 | 649.238  | 142.1102 | 258.4163 |
| 22.33716 | 912.4481 | 818.0755 | 15270.51 | 410.3772 | 5765.414 | 748.9904 | 650.7384 | 142.1853 | 258.4908 |

|          |          |          |          |          |          |          |          |          |          |
|----------|----------|----------|----------|----------|----------|----------|----------|----------|----------|
| 22.39052 | 912.7117 | 818.4324 | 15302.38 | 410.4896 | 5767.11  | 749.1961 | 652.238  | 142.2569 | 258.5617 |
| 22.45539 | 913.0358 | 818.6578 | 15341.07 | 410.6271 | 5769.174 | 749.4474 | 654.0599 | 142.3393 | 258.6434 |
| 22.5289  | 913.4081 | 818.6267 | 15384.85 | 410.7838 | 5771.515 | 749.7338 | 656.1228 | 142.4263 | 258.7296 |
| 22.59575 | 913.747  | 818.5436 | 15424.62 | 410.9264 | 5773.64  | 749.9943 | 657.9975 | 142.504  | 258.8067 |
| 22.64982 | 914.006  | 819.2108 | 15456.74 | 411.0382 | 5775.338 | 750.1989 | 659.5125 | 142.5829 | 258.8848 |
| 22.70004 | 914.2487 | 819.7005 | 15486.54 | 411.1425 | 5776.916 | 750.3897 | 660.9189 | 142.6532 | 258.9545 |
| 22.75866 | 914.5375 | 819.9777 | 15521.28 | 411.2654 | 5778.761 | 750.6144 | 662.5594 | 142.7287 | 259.0294 |
| 22.82978 | 914.8914 | 820.1036 | 15563.39 | 411.4152 | 5781.002 | 750.8882 | 664.5484 | 142.8157 | 259.1156 |
| 22.90215 | 915.2577 | 819.8841 | 15606.17 | 411.569  | 5783.286 | 751.1691 | 666.5709 | 142.8965 | 259.1957 |
| 22.96194 | 915.5492 | 820.2366 | 15641.47 | 411.6933 | 5785.156 | 751.3965 | 668.2404 | 142.9748 | 259.2733 |
| 23.01208 | 915.7856 | 820.9093 | 15671.04 | 411.7958 | 5786.712 | 751.5841 | 669.6395 | 143.0485 | 259.3464 |
| 23.06511 | 916.0425 | 821.2598 | 15702.27 | 411.9056 | 5788.364 | 751.785  | 671.1182 | 143.1186 | 259.4159 |
| 23.13056 | 916.3634 | 821.4779 | 15740.78 | 412.042  | 5790.406 | 752.0343 | 672.9424 | 143.2004 | 259.4969 |
| 23.20503 | 916.7341 | 821.4079 | 15784.54 | 412.1983 | 5792.732 | 752.3199 | 675.0163 | 143.2863 | 259.5821 |
| 23.25839 | 916.988  | 821.9188 | 15815.85 | 412.3076 | 5794.382 | 752.5198 | 676.501  | 143.36   | 259.6551 |
| 23.31175 | 917.2447 | 822.2712 | 15847.13 | 412.4174 | 5796.033 | 752.7207 | 677.9849 | 143.4302 | 259.7247 |
| 23.37662 | 917.5605 | 822.4902 | 15885.11 | 412.5518 | 5798.042 | 752.9663 | 679.7879 | 143.5109 | 259.8046 |
| 23.45013 | 917.9234 | 822.4506 | 15928.09 | 412.7051 | 5800.322 | 753.2463 | 681.8292 | 143.5959 | 259.8889 |
| 23.51698 | 918.2539 | 822.3595 | 15967.12 | 412.8445 | 5802.393 | 753.5009 | 683.6842 | 143.6718 | 259.9642 |
| 23.57105 | 918.5061 | 823.0236 | 15998.64 | 412.9537 | 5804.046 | 753.7008 | 685.1834 | 143.7493 | 260.0409 |
| 23.62127 | 918.7425 | 823.5099 | 16027.9  | 413.0556 | 5805.583 | 753.8873 | 686.575  | 143.8183 | 260.1093 |
| 23.67989 | 919.024  | 823.7818 | 16062    | 413.1757 | 5807.381 | 754.107  | 688.1984 | 143.8923 | 260.1827 |
| 23.75101 | 919.3692 | 823.9003 | 16103.33 | 413.3222 | 5809.565 | 754.3747 | 690.1665 | 143.9774 | 260.2671 |
| 23.82338 | 919.7267 | 823.6718 | 16145.33 | 413.4726 | 5811.792 | 754.6494 | 692.1678 | 144.0563 | 260.3452 |
| 23.88317 | 920.0109 | 824.0193 | 16179.98 | 413.5943 | 5813.614 | 754.8718 | 693.8199 | 144.133  | 260.4213 |
| 23.93332 | 920.2413 | 824.6896 | 16209    | 413.6944 | 5815.131 | 755.0551 | 695.2044 | 144.2056 | 260.4932 |
| 23.98634 | 920.4918 | 825.0359 | 16239.66 | 413.8018 | 5816.742 | 755.2515 | 696.6675 | 144.2743 | 260.5613 |
| 24.05179 | 920.8049 | 825.2478 | 16277.46 | 413.9352 | 5818.733 | 755.4953 | 698.4725 | 144.3544 | 260.6407 |
| 24.12626 | 921.1668 | 825.1694 | 16320.41 | 414.0882 | 5821.002 | 755.7747 | 700.5246 | 144.4384 | 260.7239 |
| 24.17962 | 921.4145 | 825.6769 | 16351.14 | 414.195  | 5822.611 | 755.9703 | 701.9938 | 144.5107 | 260.7957 |
| 24.23298 | 921.6649 | 826.0251 | 16381.84 | 414.3025 | 5824.222 | 756.1668 | 703.4621 | 144.5796 | 260.8639 |
| 24.29786 | 921.9732 | 826.2381 | 16419.12 | 414.4339 | 5826.182 | 756.407  | 705.2461 | 144.6586 | 260.9422 |
| 24.37136 | 922.3277 | 826.1904 | 16461.31 | 414.5839 | 5828.407 | 756.681  | 707.2659 | 144.7417 | 261.0246 |
| 24.43821 | 922.6506 | 826.0919 | 16499.62 | 414.7204 | 5830.428 | 756.9302 | 709.1014 | 144.816  | 261.0982 |

|          |          |          |          |          |          |          |          |          |          |
|----------|----------|----------|----------|----------|----------|----------|----------|----------|----------|
| 24.49228 | 922.8965 | 826.7532 | 16530.57 | 414.8272 | 5832.042 | 757.1257 | 710.5848 | 144.8921 | 261.1737 |
| 24.54251 | 923.1273 | 827.2364 | 16559.28 | 414.9268 | 5833.542 | 757.3081 | 711.9618 | 144.9599 | 261.2409 |
| 24.60113 | 923.4022 | 827.5033 | 16592.76 | 415.0444 | 5835.297 | 757.5231 | 713.568  | 145.0325 | 261.3128 |
| 24.67224 | 923.7394 | 827.6149 | 16633.32 | 415.1878 | 5837.43  | 757.7851 | 715.5154 | 145.1158 | 261.3954 |
| 24.74462 | 924.089  | 827.3779 | 16674.55 | 415.3351 | 5839.604 | 758.054  | 717.4956 | 145.1928 | 261.4717 |
| 24.80441 | 924.3665 | 827.7207 | 16708.55 | 415.4542 | 5841.384 | 758.2717 | 719.1302 | 145.2681 | 261.5463 |
| 24.85456 | 924.5913 | 828.3887 | 16737.04 | 415.5521 | 5842.865 | 758.4511 | 720.5001 | 145.3394 | 261.617  |
| 24.90758 | 924.836  | 828.7311 | 16767.13 | 415.6572 | 5844.439 | 758.6433 | 721.9478 | 145.4069 | 261.6839 |
| 24.97303 | 925.142  | 828.9372 | 16804.24 | 415.7878 | 5846.384 | 758.882  | 723.7337 | 145.4853 | 261.7616 |
| 25.0475  | 925.4959 | 828.8509 | 16846.4  | 415.9376 | 5848.601 | 759.1556 | 725.7641 | 145.5675 | 261.843  |
| 25.10086 | 925.7378 | 829.3551 | 16876.56 | 416.0422 | 5850.172 | 759.347  | 727.2178 | 145.6386 | 261.9135 |
| 25.15422 | 925.9826 | 829.6995 | 16906.7  | 416.1474 | 5851.746 | 759.5393 | 728.6705 | 145.7061 | 261.9805 |
| 25.2191  | 926.284  | 829.9069 | 16943.29 | 416.2761 | 5853.662 | 759.7746 | 730.4356 | 145.7835 | 262.0572 |
| 25.2926  | 926.6307 | 829.8516 | 16984.7  | 416.423  | 5855.837 | 760.0429 | 732.4341 | 145.8648 | 262.1378 |
| 25.35945 | 926.9466 | 829.7458 | 17022.3  | 416.5567 | 5857.812 | 760.287  | 734.2501 | 145.9375 | 262.2098 |
| 25.41353 | 927.1868 | 830.4046 | 17052.68 | 416.6613 | 5859.389 | 760.4784 | 735.7178 | 146.0123 | 262.284  |
| 25.46375 | 927.4123 | 830.8849 | 17080.86 | 416.7589 | 5860.855 | 760.657  | 737.0802 | 146.0789 | 262.35   |
| 25.52237 | 927.6811 | 831.1472 | 17113.72 | 416.874  | 5862.572 | 760.8675 | 738.6694 | 146.1501 | 262.4205 |
| 25.59349 | 928.011  | 831.2522 | 17153.54 | 417.0145 | 5864.657 | 761.1241 | 740.5961 | 146.2317 | 262.5014 |
| 25.66586 | 928.3532 | 831.007  | 17194    | 417.1588 | 5866.783 | 761.3876 | 742.5553 | 146.307  | 262.576  |
| 25.72566 | 928.6246 | 831.3454 | 17227.38 | 417.2754 | 5868.524 | 761.6008 | 744.1726 | 146.3808 | 262.6492 |
| 25.7758  | 928.8443 | 832.0114 | 17255.34 | 417.3713 | 5869.972 | 761.7764 | 745.5279 | 146.451  | 262.7188 |
| 25.82883 | 929.0836 | 832.3501 | 17284.88 | 417.4743 | 5871.511 | 761.9647 | 746.9602 | 146.5172 | 262.7844 |
| 25.89428 | 929.383  | 832.5507 | 17321.3  | 417.6022 | 5873.413 | 762.1985 | 748.7272 | 146.5941 | 262.8606 |
| 25.96875 | 929.7295 | 832.4568 | 17362.68 | 417.749  | 5875.582 | 762.4666 | 750.736  | 146.6744 | 262.9403 |
| 26.02211 | 929.966  | 832.958  | 17392.29 | 417.8514 | 5877.12  | 762.6541 | 752.1742 | 146.7443 | 263.0095 |
| 26.07547 | 930.2054 | 833.2986 | 17421.86 | 417.9545 | 5878.659 | 762.8425 | 753.6115 | 146.8106 | 263.0752 |
| 26.14034 | 930.5004 | 833.5007 | 17457.78 | 418.0806 | 5880.534 | 763.073  | 755.3578 | 146.8865 | 263.1505 |
| 26.21385 | 930.8399 | 833.4381 | 17498.42 | 418.2246 | 5882.662 | 763.336  | 757.335  | 146.9661 | 263.2293 |
| 26.2807  | 931.1492 | 833.3255 | 17535.34 | 418.3556 | 5884.595 | 763.5752 | 759.1317 | 147.0371 | 263.2997 |
| 26.33478 | 931.3842 | 833.9819 | 17565.15 | 418.458  | 5886.138 | 763.7627 | 760.5837 | 147.1108 | 263.3727 |
| 26.385   | 931.6047 | 834.4595 | 17592.81 | 418.5536 | 5887.573 | 763.9376 | 761.9316 | 147.1762 | 263.4376 |
| 26.44362 | 931.8679 | 834.7173 | 17625.07 | 418.6664 | 5889.253 | 764.1438 | 763.5039 | 147.2461 | 263.5068 |
| 26.51474 | 932.1909 | 834.816  | 17664.15 | 418.8041 | 5891.293 | 764.3954 | 765.4101 | 147.326  | 263.586  |

|          |          |          |          |          |          |          |          |          |          |
|----------|----------|----------|----------|----------|----------|----------|----------|----------|----------|
| 26.58711 | 932.5262 | 834.5629 | 17703.86 | 418.9456 | 5893.375 | 764.6537 | 767.3483 | 147.3995 | 263.6589 |
| 26.64691 | 932.7919 | 834.8971 | 17736.63 | 419.0599 | 5895.079 | 764.8626 | 768.9483 | 147.472  | 263.7308 |
| 26.69705 | 933.0067 | 835.5613 | 17764.07 | 419.1538 | 5896.496 | 765.0346 | 770.2892 | 147.5411 | 263.7993 |
| 26.75008 | 933.241  | 835.8964 | 17793.06 | 419.2547 | 5898.003 | 765.2191 | 771.7062 | 147.6061 | 263.8637 |
| 26.81553 | 933.5342 | 836.0918 | 17828.81 | 419.3801 | 5899.865 | 765.4483 | 773.4543 | 147.6815 | 263.9384 |
| 26.89    | 933.8737 | 835.9905 | 17869.43 | 419.5241 | 5901.989 | 765.7112 | 775.4416 | 147.7601 | 264.0163 |
| 26.94336 | 934.1051 | 836.4889 | 17898.49 | 419.6245 | 5903.494 | 765.8948 | 776.8644 | 147.8288 | 264.0844 |
| 26.99672 | 934.3396 | 836.826  | 17927.52 | 419.7255 | 5905.001 | 766.0795 | 778.2864 | 147.8939 | 264.1489 |
| 27.0616  | 934.6285 | 837.0229 | 17962.77 | 419.8491 | 5906.837 | 766.3054 | 780.014  | 147.9683 | 264.2227 |
| 27.1351  | 934.9611 | 836.9533 | 18002.67 | 419.9903 | 5908.921 | 766.5633 | 781.97   | 148.0462 | 264.2999 |
| 27.20196 | 935.2644 | 836.8341 | 18038.89 | 420.1187 | 5910.815 | 766.7979 | 783.7474 | 148.1157 | 264.3687 |
| 27.25603 | 935.4943 | 837.4883 | 18068.16 | 420.2191 | 5912.326 | 766.9816 | 785.1839 | 148.1881 | 264.4406 |
| 27.30626 | 935.7102 | 837.9633 | 18095.31 | 420.3128 | 5913.731 | 767.153  | 786.5174 | 148.2525 | 264.5044 |
| 27.36487 | 935.9679 | 838.2168 | 18126.97 | 420.4234 | 5915.376 | 767.3552 | 788.0728 | 148.321  | 264.5723 |
| 27.43599 | 936.2845 | 838.3095 | 18165.33 | 420.5584 | 5917.375 | 767.6018 | 789.9585 | 148.3993 | 264.6499 |
| 27.50837 | 936.6132 | 838.0488 | 18204.31 | 420.6972 | 5919.415 | 767.8552 | 791.876  | 148.4712 | 264.7211 |
| 27.56816 | 936.8735 | 838.3789 | 18236.47 | 420.8092 | 5921.084 | 768.06   | 793.4588 | 148.5424 | 264.7917 |
| 27.61831 | 937.0838 | 839.0413 | 18263.41 | 420.9012 | 5922.472 | 768.2285 | 794.7853 | 148.6104 | 264.8591 |
| 27.67133 | 937.3132 | 839.3731 | 18291.86 | 421.0002 | 5923.948 | 768.4094 | 796.1871 | 148.6742 | 264.9223 |
| 27.73679 | 937.6005 | 839.5634 | 18326.95 | 421.1231 | 5925.772 | 768.6341 | 797.9164 | 148.7481 | 264.9956 |
| 27.81126 | 937.9334 | 839.455  | 18366.81 | 421.2643 | 5927.853 | 768.8919 | 799.8824 | 148.8251 | 265.0719 |
| 27.86462 | 938.1601 | 839.9506 | 18395.34 | 421.3627 | 5929.328 | 769.072  | 801.2899 | 148.8926 | 265.1388 |
| 27.91798 | 938.3897 | 840.2844 | 18423.83 | 421.4617 | 5930.805 | 769.253  | 802.6966 | 148.9565 | 265.2022 |
| 27.98286 | 938.6729 | 840.4763 | 18458.44 | 421.5829 | 5932.604 | 769.4746 | 804.4056 | 149.0295 | 265.2745 |
| 28.05636 | 938.9991 | 840.3999 | 18497.59 | 421.7214 | 5934.646 | 769.7275 | 806.3405 | 149.1057 | 265.3501 |
| 28.12321 | 939.2964 | 840.2743 | 18533.15 | 421.8475 | 5936.502 | 769.9576 | 808.0988 | 149.1737 | 265.4175 |
| 28.17729 | 939.5215 | 840.9264 | 18561.87 | 421.9458 | 5937.982 | 770.1376 | 809.5199 | 149.245  | 265.4881 |
| 28.22752 | 939.7331 | 841.3989 | 18588.52 | 422.0377 | 5939.359 | 770.3057 | 810.839  | 149.3083 | 265.5509 |
| 28.28614 | 939.9857 | 841.6483 | 18619.59 | 422.1461 | 5940.972 | 770.504  | 812.3777 | 149.3756 | 265.6175 |
| 28.35725 | 940.296  | 841.7352 | 18657.24 | 422.2785 | 5942.931 | 770.7459 | 814.243  | 149.4523 | 265.6936 |
| 28.42963 | 940.6185 | 841.4671 | 18695.51 | 422.4147 | 5944.93  | 770.9945 | 816.1398 | 149.5226 | 265.7632 |
| 28.48942 | 940.8736 | 841.7933 | 18727.07 | 422.5246 | 5946.566 | 771.1953 | 817.7056 | 149.5924 | 265.8325 |
| 28.53957 | 941.0795 | 842.454  | 18753.51 | 422.6148 | 5947.927 | 771.3605 | 819.0178 | 149.6594 | 265.8988 |
| 28.5926  | 941.3044 | 842.7825 | 18781.44 | 422.7118 | 5949.373 | 771.5379 | 820.4044 | 149.7221 | 265.961  |

|          |          |          |          |          |          |          |          |          |          |
|----------|----------|----------|----------|----------|----------|----------|----------|----------|----------|
| 28.65805 | 941.586  | 842.9679 | 18815.88 | 422.8324 | 5951.162 | 771.7583 | 822.1151 | 149.7946 | 266.0328 |
| 28.73252 | 941.9126 | 842.8527 | 18855.01 | 422.9709 | 5953.202 | 772.0112 | 824.0598 | 149.8699 | 266.1075 |
| 28.78588 | 942.1347 | 843.3457 | 18883.01 | 423.0674 | 5954.647 | 772.1877 | 825.4521 | 149.9363 | 266.1733 |
| 28.83925 | 942.3598 | 843.6762 | 18910.97 | 423.1645 | 5956.095 | 772.3653 | 826.8436 | 149.9991 | 266.2355 |
| 28.90412 | 942.6374 | 843.8633 | 18944.94 | 423.2834 | 5957.859 | 772.5826 | 828.5342 | 150.0707 | 266.3065 |
| 28.97763 | 942.9574 | 843.7803 | 18983.37 | 423.4193 | 5959.861 | 772.8307 | 830.4482 | 150.1453 | 266.3804 |
| 29.04448 | 943.2491 | 843.6485 | 19018.27 | 423.5429 | 5961.681 | 773.0565 | 832.1875 | 150.2118 | 266.4464 |
| 29.09856 | 943.4696 | 844.2986 | 19046.46 | 423.6394 | 5963.132 | 773.233  | 833.5931 | 150.282  | 266.516  |
| 29.14878 | 943.6769 | 844.7687 | 19072.62 | 423.7294 | 5964.482 | 773.3978 | 834.898  | 150.3443 | 266.5777 |
| 29.2074  | 943.9246 | 845.0141 | 19103.12 | 423.8358 | 5966.063 | 773.5923 | 836.42   | 150.4102 | 266.643  |
| 29.27852 | 944.229  | 845.0952 | 19140.07 | 423.9657 | 5967.984 | 773.8296 | 838.2652 | 150.4855 | 266.7176 |
| 29.35089 | 944.5455 | 844.82   | 19177.62 | 424.0994 | 5969.945 | 774.0735 | 840.1414 | 150.5541 | 266.7857 |
| 29.41069 | 944.7956 | 845.1424 | 19208.61 | 424.2071 | 5971.549 | 774.2705 | 841.6902 | 150.6227 | 266.8537 |
| 29.46084 | 944.9973 | 845.8015 | 19234.56 | 424.2956 | 5972.883 | 774.4325 | 842.9882 | 150.6887 | 266.919  |
| 29.51387 | 945.2178 | 846.1269 | 19261.97 | 424.3907 | 5974.301 | 774.6065 | 844.3598 | 150.7503 | 266.9801 |
| 29.57932 | 945.494  | 846.3075 | 19295.77 | 424.509  | 5976.055 | 774.8227 | 846.0519 | 150.8214 | 267.0506 |
| 29.65379 | 945.8144 | 846.1855 | 19334.18 | 424.6449 | 5978.056 | 775.0708 | 847.9755 | 150.8951 | 267.1236 |
| 29.70715 | 946.0321 | 846.676  | 19361.66 | 424.7396 | 5979.473 | 775.244  | 849.3527 | 150.9604 | 267.1883 |
| 29.76052 | 946.2528 | 847.0034 | 19389.11 | 424.8348 | 5980.893 | 775.4181 | 850.7291 | 151.0221 | 267.2495 |
| 29.82539 | 946.5251 | 847.1858 | 19422.44 | 424.9515 | 5982.623 | 775.6313 | 852.4013 | 151.0923 | 267.3191 |
| 29.8989  | 946.8391 | 847.0964 | 19460.16 | 425.0848 | 5984.587 | 775.8748 | 854.2945 | 151.1653 | 267.3915 |
| 29.96575 | 947.1254 | 846.9586 | 19494.42 | 425.2062 | 5986.372 | 776.0964 | 856.0149 | 151.2304 | 267.456  |
| 30.01983 | 947.3415 | 847.6067 | 19522.09 | 425.3007 | 5987.795 | 776.2694 | 857.4053 | 151.2996 | 267.5245 |
| 30.07005 | 947.5447 | 848.0744 | 19547.77 | 425.389  | 5989.119 | 776.4311 | 858.696  | 151.3608 | 267.5852 |
| 30.12867 | 947.7876 | 848.316  | 19577.7  | 425.4934 | 5990.669 | 776.6219 | 860.2014 | 151.4255 | 267.6494 |
| 30.19979 | 948.0863 | 848.3916 | 19613.97 | 425.6209 | 5992.554 | 776.8547 | 862.0265 | 151.4993 | 267.7224 |
| 30.27217 | 948.397  | 848.1093 | 19650.83 | 425.7521 | 5994.477 | 777.0941 | 863.8823 | 151.5664 | 267.789  |
| 30.33196 | 948.6422 | 848.4281 | 19681.24 | 425.8577 | 5996.051 | 777.2874 | 865.4143 | 151.6338 | 267.8558 |
| 30.38211 | 948.8399 | 849.0857 | 19706.71 | 425.9445 | 5997.359 | 777.4462 | 866.6981 | 151.6987 | 267.9201 |
| 30.43514 | 949.0561 | 849.4079 | 19733.62 | 426.0378 | 5998.75  | 777.6169 | 868.0548 | 151.7592 | 267.9801 |
| 30.50059 | 949.3271 | 849.5839 | 19766.79 | 426.1539 | 6000.47  | 777.829  | 869.7285 | 151.829  | 268.0492 |
| 30.57506 | 949.6416 | 849.4554 | 19804.49 | 426.2873 | 6002.433 | 778.0726 | 871.6311 | 151.9011 | 268.1207 |
| 30.62843 | 949.855  | 849.9435 | 19831.46 | 426.3801 | 6003.823 | 778.2424 | 872.9933 | 151.9653 | 268.1844 |
| 30.68179 | 950.0715 | 850.2678 | 19858.41 | 426.4735 | 6005.216 | 778.4133 | 874.3547 | 152.026  | 268.2445 |

|          |          |          |          |          |          |          |          |          |          |
|----------|----------|----------|----------|----------|----------|----------|----------|----------|----------|
| 30.74667 | 950.3386 | 850.4457 | 19891.12 | 426.588  | 6006.913 | 778.6224 | 876.0087 | 152.0949 | 268.3128 |
| 30.82017 | 950.6469 | 850.3499 | 19928.15 | 426.7189 | 6008.84  | 778.8614 | 877.8812 | 152.1663 | 268.3836 |
| 30.88703 | 950.9279 | 850.2062 | 19961.77 | 426.838  | 6010.591 | 779.0788 | 879.5828 | 152.23   | 268.4468 |
| 30.9411  | 951.1397 | 850.8524 | 19988.93 | 426.9307 | 6011.987 | 779.2486 | 880.958  | 152.2981 | 268.5142 |
| 30.99133 | 951.3389 | 851.3179 | 20014.13 | 427.0173 | 6013.285 | 779.4071 | 882.2346 | 152.3583 | 268.5739 |
| 31.04995 | 951.5772 | 851.5557 | 20043.51 | 427.1198 | 6014.807 | 779.5943 | 883.7236 | 152.4219 | 268.6369 |
| 31.12107 | 951.8703 | 851.6259 | 20079.11 | 427.2449 | 6016.655 | 779.8228 | 885.5288 | 152.4941 | 268.7085 |
| 31.19344 | 952.1753 | 851.3368 | 20115.29 | 427.3736 | 6018.543 | 780.0579 | 887.3643 | 152.5597 | 268.7736 |
| 31.25324 | 952.416  | 851.652  | 20145.13 | 427.4773 | 6020.086 | 780.2475 | 888.8795 | 152.6259 | 268.8391 |
| 31.30339 | 952.6097 | 852.3081 | 20170.13 | 427.5624 | 6021.37  | 780.4032 | 890.1493 | 152.6899 | 268.9026 |
| 31.35642 | 952.8217 | 852.6273 | 20196.54 | 427.6539 | 6022.734 | 780.5707 | 891.4912 | 152.7493 | 268.9615 |
| 31.42187 | 953.0877 | 852.7988 | 20229.11 | 427.7679 | 6024.422 | 780.7788 | 893.1465 | 152.8178 | 269.0293 |
| 31.49634 | 953.3964 | 852.6639 | 20266.1  | 427.8988 | 6026.349 | 781.0179 | 895.0283 | 152.8884 | 269.0993 |
| 31.54971 | 953.6057 | 853.1496 | 20292.58 | 427.9898 | 6027.712 | 781.1845 | 896.3756 | 152.9516 | 269.1619 |
| 31.60307 | 953.818  | 853.4709 | 20319.02 | 428.0815 | 6029.079 | 781.3521 | 897.7221 | 153.0111 | 269.2209 |
| 31.66795 | 954.0802 | 853.6443 | 20351.14 | 428.1938 | 6030.743 | 781.5574 | 899.3579 | 153.0787 | 269.2879 |
| 31.74145 | 954.3827 | 853.5425 | 20387.47 | 428.3223 | 6032.634 | 781.7919 | 901.2099 | 153.1487 | 269.3573 |
| 31.80831 | 954.6587 | 853.393  | 20420.48 | 428.4392 | 6034.353 | 782.0054 | 902.8929 | 153.211  | 269.4191 |
| 31.86239 | 954.8663 | 854.0374 | 20447.13 | 428.5301 | 6035.722 | 782.1719 | 904.253  | 153.278  | 269.4855 |
| 31.91261 | 955.0616 | 854.5007 | 20471.87 | 428.6151 | 6036.996 | 782.3274 | 905.5156 | 153.3373 | 269.5442 |
| 31.97123 | 955.2954 | 854.7348 | 20500.7  | 428.7156 | 6038.489 | 782.5111 | 906.9883 | 153.3997 | 269.606  |
| 32.04235 | 955.5831 | 854.7997 | 20535.65 | 428.8384 | 6040.303 | 782.7353 | 908.7736 | 153.4705 | 269.6763 |
| 32.11473 | 955.8827 | 854.5039 | 20571.15 | 428.9648 | 6042.156 | 782.9661 | 910.589  | 153.5346 | 269.7398 |
| 32.17453 | 956.1188 | 854.8156 | 20600.45 | 429.0666 | 6043.67  | 783.1521 | 912.0875 | 153.5996 | 269.8042 |
| 32.22468 | 956.3086 | 855.4702 | 20624.99 | 429.15   | 6044.929 | 783.3049 | 913.3434 | 153.6626 | 269.8667 |
| 32.2777  | 956.5167 | 855.7865 | 20650.91 | 429.2398 | 6046.268 | 783.4692 | 914.6705 | 153.721  | 269.9246 |
| 32.34316 | 956.7777 | 855.9535 | 20682.87 | 429.3516 | 6047.925 | 783.6734 | 916.3076 | 153.7882 | 269.9911 |
| 32.41763 | 957.0808 | 855.8125 | 20719.18 | 429.4802 | 6049.815 | 783.9081 | 918.1687 | 153.8573 | 270.0596 |
| 32.47099 | 957.286  | 856.2958 | 20745.17 | 429.5695 | 6051.153 | 784.0715 | 919.5012 | 153.9194 | 270.1212 |
| 32.52436 | 957.4943 | 856.6142 | 20771.12 | 429.6594 | 6052.494 | 784.236  | 920.8329 | 153.978  | 270.1792 |
| 32.58924 | 957.7516 | 856.7833 | 20802.64 | 429.7697 | 6054.127 | 784.4375 | 922.4508 | 154.0443 | 270.245  |
| 32.66274 | 958.0487 | 856.6754 | 20838.31 | 429.8958 | 6055.983 | 784.6677 | 924.2823 | 154.1128 | 270.3129 |
| 32.72959 | 958.3197 | 856.5203 | 20870.7  | 430.0105 | 6057.67  | 784.8772 | 925.9468 | 154.1738 | 270.3733 |
| 32.78367 | 958.5232 | 857.1629 | 20896.86 | 430.0997 | 6059.014 | 785.0405 | 927.292  | 154.2397 | 270.4387 |



|          |          |          |          |          |          |          |          |          |          |
|----------|----------|----------|----------|----------|----------|----------|----------|----------|----------|
| 32.8339  | 958.7148 | 857.6241 | 20921.14 | 430.1831 | 6060.263 | 785.1931 | 928.5407 | 154.298  | 270.4965 |
| 32.89252 | 958.9442 | 857.8545 | 20949.44 | 430.2817 | 6061.728 | 785.3734 | 929.9971 | 154.3593 | 270.5572 |
| 32.96364 | 959.2266 | 857.9143 | 20983.74 | 430.4022 | 6063.509 | 785.5935 | 931.7627 | 154.4287 | 270.626  |
| 33.03602 | 959.5209 | 857.6119 | 21018.59 | 430.5264 | 6065.327 | 785.82   | 933.5581 | 154.4914 | 270.6881 |
| 33.09582 | 959.7525 | 857.9203 | 21047.35 | 430.6262 | 6066.813 | 786.0026 | 935.0401 | 154.5553 | 270.7514 |
| 33.14597 | 959.9386 | 858.5734 | 21071.43 | 430.708  | 6068.048 | 786.1524 | 936.2821 | 154.6173 | 270.813  |
| 33.19899 | 960.1428 | 858.8869 | 21096.87 | 430.7962 | 6069.363 | 786.3136 | 937.5946 | 154.6747 | 270.8698 |
| 33.26445 | 960.3989 | 859.0496 | 21128.24 | 430.9059 | 6070.988 | 786.5141 | 939.2137 | 154.7406 | 270.9351 |
| 33.33892 | 960.6966 | 858.9024 | 21163.88 | 431.0321 | 6072.844 | 786.7445 | 941.0542 | 154.8082 | 271.0021 |
| 33.39228 | 960.8979 | 859.3835 | 21189.39 | 431.1197 | 6074.157 | 786.9048 | 942.372  | 154.8694 | 271.0628 |
| 33.44565 | 961.1022 | 859.699  | 21214.86 | 431.208  | 6075.473 | 787.0662 | 943.689  | 154.9269 | 271.1197 |
| 33.51053 | 961.3548 | 859.8639 | 21245.8  | 431.3162 | 6077.076 | 787.2639 | 945.289  | 154.9919 | 271.1842 |
| 33.58403 | 961.6465 | 859.7501 | 21280.81 | 431.4399 | 6078.898 | 787.4899 | 947.1003 | 155.059  | 271.2507 |
| 33.65089 | 961.9126 | 859.5895 | 21312.6  | 431.5526 | 6080.553 | 787.6957 | 948.7464 | 155.1187 | 271.3099 |
| 33.70496 | 962.1122 | 860.2303 | 21338.28 | 431.6401 | 6081.872 | 787.8558 | 950.0766 | 155.1836 | 271.3743 |
| 33.7552  | 962.3    | 860.6894 | 21362.11 | 431.7219 | 6083.098 | 788.0055 | 951.3115 | 155.241  | 271.4311 |
| 33.81382 | 962.5252 | 860.9163 | 21389.89 | 431.8187 | 6084.536 | 788.1825 | 952.7519 | 155.3011 | 271.4907 |
| 33.88494 | 962.8025 | 860.971  | 21423.55 | 431.937  | 6086.283 | 788.3985 | 954.4979 | 155.3692 | 271.5582 |
| 33.95731 | 963.0915 | 860.6623 | 21457.75 | 432.0589 | 6088.068 | 788.6209 | 956.2734 | 155.4304 | 271.6189 |
| 34.01711 | 963.3188 | 860.9673 | 21485.98 | 432.1568 | 6089.527 | 788.8001 | 957.7391 | 155.4932 | 271.6811 |
| 34.06726 | 963.5013 | 861.619  | 21509.62 | 432.2371 | 6090.739 | 788.947  | 958.9673 | 155.5543 | 271.7417 |
| 34.12029 | 963.7016 | 861.9297 | 21534.59 | 432.3236 | 6092.029 | 789.1052 | 960.2653 | 155.6107 | 271.7976 |
| 34.18574 | 963.953  | 862.0882 | 21565.38 | 432.4313 | 6093.624 | 789.302  | 961.8664 | 155.6753 | 271.8616 |
| 34.26021 | 964.2453 | 861.935  | 21600.36 | 432.5552 | 6095.446 | 789.5282 | 963.6865 | 155.7415 | 271.9272 |
| 34.31358 | 964.4428 | 862.4138 | 21625.39 | 432.6411 | 6096.734 | 789.6855 | 964.9897 | 155.8017 | 271.9868 |
| 34.36695 | 964.6433 | 862.7266 | 21650.4  | 432.7277 | 6098.026 | 789.8439 | 966.2921 | 155.8582 | 272.0428 |
| 34.43182 | 964.8912 | 862.8872 | 21680.76 | 432.8339 | 6099.599 | 790.0379 | 967.8743 | 155.922  | 272.1061 |
| 34.50533 | 965.1777 | 862.7677 | 21715.12 | 432.9555 | 6101.387 | 790.2598 | 969.6655 | 155.9877 | 272.1712 |
| 34.57218 | 965.439  | 862.6017 | 21746.32 | 433.0661 | 6103.013 | 790.4618 | 971.2933 | 156.0461 | 272.2291 |
| 34.62626 | 965.6347 | 863.2408 | 21771.53 | 433.1519 | 6104.306 | 790.6189 | 972.6088 | 156.1101 | 272.2925 |
| 34.67649 | 965.819  | 863.6979 | 21794.92 | 433.2322 | 6105.51  | 790.7658 | 973.83   | 156.1665 | 272.3484 |
| 34.73511 | 966.04   | 863.9213 | 21822.18 | 433.3272 | 6106.921 | 790.9394 | 975.2543 | 156.2255 | 272.4069 |
| 34.80623 | 966.3122 | 863.9711 | 21855.22 | 433.4433 | 6108.637 | 791.1515 | 976.981  | 156.2923 | 272.4731 |
| 34.87861 | 966.5961 | 863.656  | 21888.79 | 433.5629 | 6110.389 | 791.3698 | 978.7368 | 156.3521 | 272.5324 |

|          |          |          |          |          |          |          |          |          |          |
|----------|----------|----------|----------|----------|----------|----------|----------|----------|----------|
| 34.93841 | 966.8192 | 863.9578 | 21916.49 | 433.6591 | 6111.821 | 791.5456 | 980.1861 | 156.4137 | 272.5935 |
| 34.98856 | 966.9981 | 864.6082 | 21939.7  | 433.7378 | 6113.01  | 791.6898 | 981.4007 | 156.474  | 272.6532 |
| 35.04159 | 967.1946 | 864.9161 | 21964.21 | 433.8227 | 6114.276 | 791.8451 | 982.6842 | 156.5294 | 272.7081 |
| 35.10704 | 967.4414 | 865.0704 | 21994.43 | 433.9284 | 6115.842 | 792.0382 | 984.2675 | 156.5928 | 272.771  |
| 35.18151 | 967.7285 | 864.9114 | 22028.76 | 434.05   | 6117.63  | 792.2603 | 986.0674 | 156.6576 | 272.8352 |
| 35.23488 | 967.9222 | 865.3881 | 22053.33 | 434.1344 | 6118.895 | 792.4146 | 987.3561 | 156.7168 | 272.8938 |
| 35.28825 | 968.119  | 865.698  | 22077.87 | 434.2194 | 6120.162 | 792.57   | 988.644  | 156.7723 | 272.9489 |
| 35.35313 | 968.3623 | 865.8546 | 22107.68 | 434.3236 | 6121.707 | 792.7605 | 990.2086 | 156.8349 | 273.0109 |
| 35.42663 | 968.6437 | 865.7295 | 22141.4  | 434.4429 | 6123.462 | 792.9783 | 991.9798 | 156.8992 | 273.0746 |
| 35.49348 | 968.9004 | 865.5581 | 22172.03 | 434.5515 | 6125.058 | 793.1766 | 993.5895 | 156.9563 | 273.1313 |
| 35.54756 | 969.0922 | 866.1956 | 22196.77 | 434.6357 | 6126.327 | 793.3308 | 994.8903 | 157.0193 | 273.1937 |
| 35.5978  | 969.273  | 866.6506 | 22219.72 | 434.7145 | 6127.509 | 793.4749 | 996.0979 | 157.0749 | 273.2488 |
| 35.65642 | 969.4899 | 866.8707 | 22246.48 | 434.8077 | 6128.894 | 793.6453 | 997.5063 | 157.1328 | 273.3062 |
| 35.72754 | 969.7572 | 866.9156 | 22278.91 | 434.9217 | 6130.578 | 793.8535 | 999.2137 | 157.1982 | 273.3711 |
| 35.79991 | 970.0361 | 866.5944 | 22311.86 | 435.0392 | 6132.298 | 794.0679 | 1000.95  | 157.2567 | 273.429  |
| 35.85971 | 970.255  | 866.893  | 22339.05 | 435.1335 | 6133.703 | 794.2404 | 1002.383 | 157.3172 | 273.489  |
| 35.90987 | 970.4304 | 867.542  | 22361.82 | 435.2107 | 6134.87  | 794.3818 | 1003.584 | 157.3766 | 273.5479 |
| 35.96289 | 970.6232 | 867.8473 | 22385.88 | 435.2941 | 6136.113 | 794.5342 | 1004.853 | 157.4311 | 273.6018 |
| 36.02835 | 970.8655 | 867.9975 | 22415.54 | 435.3978 | 6137.65  | 794.7238 | 1006.419 | 157.4933 | 273.6635 |
| 36.10282 | 971.1475 | 867.8327 | 22449.24 | 435.5172 | 6139.405 | 794.9418 | 1008.199 | 157.5566 | 273.7263 |
| 36.15619 | 971.3375 | 868.3073 | 22473.36 | 435.6    | 6140.647 | 795.0932 | 1009.473 | 157.6149 | 273.784  |
| 36.20955 | 971.5306 | 868.6146 | 22497.45 | 435.6834 | 6141.891 | 795.2457 | 1010.746 | 157.6695 | 273.8381 |
| 36.27443 | 971.7695 | 868.7672 | 22526.7  | 435.7857 | 6143.407 | 795.4327 | 1012.294 | 157.7309 | 273.899  |
| 36.34794 | 972.0458 | 868.6365 | 22559.8  | 435.9028 | 6145.13  | 795.6465 | 1014.045 | 157.7938 | 273.9614 |
| 36.41479 | 972.298  | 868.4599 | 22589.86 | 436.0095 | 6146.697 | 795.8412 | 1015.637 | 157.8497 | 274.0168 |
| 36.46887 | 972.4861 | 869.0957 | 22614.14 | 436.0921 | 6147.943 | 795.9924 | 1016.923 | 157.9118 | 274.0783 |
| 36.5191  | 972.6634 | 869.5488 | 22636.67 | 436.1693 | 6149.102 | 796.1338 | 1018.117 | 157.9664 | 274.1325 |
| 36.57773 | 972.8763 | 869.7656 | 22662.94 | 436.2608 | 6150.462 | 796.3011 | 1019.51  | 158.0233 | 274.1889 |
| 36.64885 | 973.1388 | 869.8057 | 22694.76 | 436.3727 | 6152.115 | 796.5055 | 1021.198 | 158.0875 | 274.2524 |
| 36.72122 | 973.4128 | 869.4784 | 22727.11 | 436.4881 | 6153.804 | 796.716  | 1022.915 | 158.1446 | 274.3091 |
| 36.78102 | 973.6276 | 869.7739 | 22753.79 | 436.5807 | 6155.183 | 796.8853 | 1024.332 | 158.2041 | 274.368  |
| 36.83117 | 973.7996 | 870.4216 | 22776.14 | 436.6564 | 6156.329 | 797.0241 | 1025.519 | 158.2626 | 274.426  |
| 36.8842  | 973.9888 | 870.7243 | 22799.76 | 436.7382 | 6157.548 | 797.1736 | 1026.774 | 158.3161 | 274.479  |
| 36.94966 | 974.2267 | 870.8705 | 22828.87 | 436.84   | 6159.057 | 797.3596 | 1028.322 | 158.3771 | 274.5395 |

|          |          |          |          |          |          |          |          |          |          |
|----------|----------|----------|----------|----------|----------|----------|----------|----------|----------|
| 37.02413 | 974.5037 | 870.7001 | 22861.94 | 436.9573 | 6160.781 | 797.5737 | 1030.082 | 158.4391 | 274.601  |
| 37.0775  | 974.69   | 871.1725 | 22885.61 | 437.0385 | 6161.999 | 797.7223 | 1031.342 | 158.4964 | 274.6578 |
| 37.13087 | 974.8795 | 871.4772 | 22909.26 | 437.1203 | 6163.22  | 797.872  | 1032.601 | 158.5501 | 274.7109 |
| 37.19574 | 975.114  | 871.6259 | 22937.97 | 437.2207 | 6164.709 | 798.0554 | 1034.131 | 158.6103 | 274.7707 |
| 37.26925 | 975.3854 | 871.4898 | 22970.45 | 437.3358 | 6166.4   | 798.2654 | 1035.863 | 158.6719 | 274.8317 |
| 37.3361  | 975.6331 | 871.3081 | 22999.96 | 437.4405 | 6167.938 | 798.4566 | 1037.437 | 158.7266 | 274.8859 |
| 37.39018 | 975.8176 | 871.9423 | 23023.79 | 437.5215 | 6169.161 | 798.6049 | 1038.708 | 158.7878 | 274.9465 |
| 37.44042 | 975.9915 | 872.3935 | 23045.91 | 437.5973 | 6170.299 | 798.7437 | 1039.889 | 158.8415 | 274.9998 |
| 37.49904 | 976.2005 | 872.607  | 23071.69 | 437.6871 | 6171.634 | 798.9078 | 1041.266 | 158.8974 | 275.0552 |
| 37.57016 | 976.4582 | 872.6424 | 23102.93 | 437.7969 | 6173.256 | 799.1084 | 1042.935 | 158.9603 | 275.1175 |
| 37.64253 | 976.7275 | 872.3092 | 23134.67 | 437.9103 | 6174.915 | 799.3152 | 1044.633 | 159.0161 | 275.1728 |
| 37.70233 | 976.9383 | 872.6016 | 23160.86 | 438.0011 | 6176.269 | 799.4814 | 1046.034 | 159.0745 | 275.2307 |
| 37.75249 | 977.1069 | 873.248  | 23182.8  | 438.0754 | 6177.393 | 799.6175 | 1047.208 | 159.1322 | 275.2879 |
| 37.80552 | 977.2926 | 873.5481 | 23205.98 | 438.1557 | 6178.59  | 799.7642 | 1048.449 | 159.1847 | 275.34   |
| 37.87097 | 977.5261 | 873.6904 | 23234.55 | 438.2556 | 6180.072 | 799.9468 | 1049.98  | 159.2446 | 275.3994 |
| 37.94544 | 977.7982 | 873.5145 | 23267.02 | 438.3708 | 6181.763 | 800.157  | 1051.72  | 159.3053 | 275.4595 |
| 37.99881 | 977.981  | 873.9849 | 23290.25 | 438.4504 | 6182.959 | 800.3028 | 1052.966 | 159.3617 | 275.5154 |
| 38.05218 | 978.1669 | 874.2869 | 23313.45 | 438.5307 | 6184.158 | 800.4497 | 1054.211 | 159.4144 | 275.5676 |
| 38.11706 | 978.3971 | 874.4318 | 23341.63 | 438.6293 | 6185.619 | 800.6298 | 1055.723 | 159.4735 | 275.6263 |
| 38.19056 | 978.6637 | 874.2904 | 23373.52 | 438.7422 | 6187.28  | 800.836  | 1057.435 | 159.5338 | 275.686  |
| 38.25742 | 978.9071 | 874.1037 | 23402.48 | 438.8451 | 6188.79  | 801.0236 | 1058.991 | 159.5873 | 275.739  |
| 38.3115  | 979.0879 | 874.7363 | 23425.87 | 438.9245 | 6189.99  | 801.1692 | 1060.249 | 159.6475 | 275.7987 |
| 38.36173 | 979.2585 | 875.1856 | 23447.57 | 438.9989 | 6191.107 | 801.3053 | 1061.416 | 159.7005 | 275.8512 |
| 38.42036 | 979.4637 | 875.3959 | 23472.88 | 439.0871 | 6192.417 | 801.4664 | 1062.778 | 159.7553 | 275.9055 |
| 38.49148 | 979.7167 | 875.4267 | 23503.54 | 439.1949 | 6194.01  | 801.6634 | 1064.428 | 159.8169 | 275.9666 |
| 38.56385 | 979.9813 | 875.0878 | 23534.7  | 439.3062 | 6195.638 | 801.8664 | 1066.106 | 159.8714 | 276.0206 |
| 38.62365 | 980.1882 | 875.3771 | 23560.41 | 439.3954 | 6196.968 | 802.0295 | 1067.492 | 159.9288 | 276.0775 |
| 38.67381 | 980.3535 | 876.0223 | 23581.94 | 439.4682 | 6198.071 | 802.163  | 1068.653 | 159.9857 | 276.1339 |
| 38.72684 | 980.5357 | 876.3198 | 23604.68 | 439.547  | 6199.246 | 802.307  | 1069.88  | 160.0374 | 276.1851 |
| 38.79229 | 980.765  | 876.4583 | 23632.73 | 439.6451 | 6200.7   | 802.4863 | 1071.393 | 160.0961 | 276.2433 |
| 38.86676 | 981.0322 | 876.277  | 23664.59 | 439.7581 | 6202.361 | 802.6926 | 1073.113 | 160.1555 | 276.3021 |
| 38.92013 | 981.2115 | 876.7453 | 23687.4  | 439.8363 | 6203.535 | 802.8356 | 1074.345 | 160.211  | 276.3572 |
| 38.9735  | 981.394  | 877.0449 | 23710.17 | 439.9151 | 6204.712 | 802.9798 | 1075.576 | 160.2628 | 276.4085 |
| 39.03838 | 981.62   | 877.1859 | 23737.83 | 440.0119 | 6206.146 | 803.1566 | 1077.071 | 160.3208 | 276.466  |

|          |          |          |          |          |          |          |          |          |          |
|----------|----------|----------|----------|----------|----------|----------|----------|----------|----------|
| 39.11188 | 981.8819 | 877.0393 | 23769.13 | 440.1227 | 6207.777 | 803.359  | 1078.764 | 160.3798 | 276.5245 |
| 39.17874 | 982.1209 | 876.8477 | 23797.55 | 440.2237 | 6209.259 | 803.5433 | 1080.303 | 160.4321 | 276.5763 |
| 39.23282 | 982.2983 | 877.4788 | 23820.51 | 440.3017 | 6210.437 | 803.6861 | 1081.546 | 160.4915 | 276.6352 |
| 39.28306 | 982.4656 | 877.9262 | 23841.81 | 440.3746 | 6211.533 | 803.8197 | 1082.7   | 160.5435 | 276.6868 |
| 39.34168 | 982.667  | 878.1334 | 23866.65 | 440.4612 | 6212.82  | 803.9778 | 1084.046 | 160.5974 | 276.7402 |
| 39.4128  | 982.9155 | 878.1597 | 23896.74 | 440.567  | 6214.383 | 804.1711 | 1085.678 | 160.6578 | 276.8    |
| 39.48517 | 983.1754 | 877.815  | 23927.33 | 440.6763 | 6215.982 | 804.3705 | 1087.337 | 160.711  | 276.8528 |
| 39.54498 | 983.3785 | 878.1014 | 23952.56 | 440.7638 | 6217.287 | 804.5306 | 1088.707 | 160.7674 | 276.9087 |
| 39.59513 | 983.5405 | 878.7454 | 23973.69 | 440.8353 | 6218.37  | 804.6615 | 1089.855 | 160.8234 | 276.9642 |
| 39.64816 | 983.7194 | 879.0404 | 23996.02 | 440.9126 | 6219.523 | 804.8028 | 1091.067 | 160.8742 | 277.0146 |
| 39.71362 | 983.9445 | 879.1751 | 24023.55 | 441.0089 | 6220.951 | 804.9788 | 1092.564 | 160.9319 | 277.0717 |
| 39.78809 | 984.207  | 878.9885 | 24054.82 | 441.1199 | 6222.582 | 805.1814 | 1094.264 | 160.9899 | 277.1292 |
| 39.84146 | 984.3829 | 879.4548 | 24077.2  | 441.1966 | 6223.734 | 805.3218 | 1095.482 | 161.0446 | 277.1834 |
| 39.89483 | 984.562  | 879.7519 | 24099.56 | 441.2739 | 6224.889 | 805.4633 | 1096.699 | 161.0955 | 277.2338 |
| 39.95971 | 984.7839 | 879.8893 | 24126.7  | 441.3689 | 6226.297 | 805.6368 | 1098.178 | 161.1524 | 277.2903 |
| 40.03321 | 985.0411 | 879.7375 | 24157.42 | 441.4778 | 6227.898 | 805.8356 | 1099.851 | 161.2101 | 277.3475 |
| 40.10007 | 985.2759 | 879.5411 | 24185.32 | 441.5769 | 6229.353 | 806.0165 | 1101.372 | 161.2613 | 277.3982 |
| 40.15415 | 985.4498 | 880.1707 | 24207.85 | 441.6534 | 6230.509 | 806.1566 | 1102.601 | 161.3198 | 277.4562 |
| 40.20438 | 985.6139 | 880.6163 | 24228.76 | 441.725  | 6231.586 | 806.2876 | 1103.742 | 161.371  | 277.507  |
| 40.26301 | 985.8116 | 880.8203 | 24253.14 | 441.8099 | 6232.848 | 806.4428 | 1105.073 | 161.4239 | 277.5594 |
| 40.33413 | 986.0556 | 880.8423 | 24282.68 | 441.9138 | 6234.384 | 806.6327 | 1106.686 | 161.4831 | 277.618  |
| 40.4065  | 986.311  | 880.492  | 24312.69 | 442.0212 | 6235.953 | 806.8284 | 1108.327 | 161.5351 | 277.6696 |
| 40.4663  | 986.5103 | 880.7755 | 24337.46 | 442.1071 | 6237.234 | 806.9855 | 1109.681 | 161.5905 | 277.7245 |
| 40.51646 | 986.6692 | 881.4182 | 24358.2  | 442.1772 | 6238.297 | 807.114  | 1110.816 | 161.6457 | 277.7792 |
| 40.56949 | 986.8447 | 881.7109 | 24380.12 | 442.253  | 6239.429 | 807.2527 | 1112.015 | 161.6956 | 277.8287 |
| 40.63494 | 987.0657 | 881.8418 | 24407.13 | 442.3476 | 6240.831 | 807.4254 | 1113.494 | 161.7522 | 277.8848 |
| 40.70942 | 987.3236 | 881.65   | 24437.83 | 442.4565 | 6242.432 | 807.6244 | 1115.175 | 161.809  | 277.9411 |
| 40.76279 | 987.4961 | 882.1144 | 24459.8  | 442.5318 | 6243.562 | 807.7621 | 1116.379 | 161.8628 | 277.9944 |
| 40.81616 | 987.6718 | 882.409  | 24481.74 | 442.6077 | 6244.696 | 807.9009 | 1117.582 | 161.9128 | 278.0439 |
| 40.88103 | 987.8897 | 882.5428 | 24508.38 | 442.7009 | 6246.079 | 808.0713 | 1119.044 | 161.9686 | 278.0993 |
| 40.95454 | 988.1424 | 882.386  | 24538.53 | 442.8078 | 6247.651 | 808.2664 | 1120.699 | 162.0251 | 278.1553 |
| 41.0214  | 988.373  | 882.1848 | 24565.91 | 442.9052 | 6249.08  | 808.4441 | 1122.202 | 162.0752 | 278.2049 |
| 41.07548 | 988.5435 | 882.8129 | 24588.03 | 442.9802 | 6250.214 | 808.5815 | 1123.417 | 162.1328 | 278.262  |
| 41.12571 | 988.7046 | 883.2567 | 24608.56 | 443.0505 | 6251.271 | 808.7101 | 1124.545 | 162.1833 | 278.312  |

|          |          |          |          |          |          |          |          |          |          |
|----------|----------|----------|----------|----------|----------|----------|----------|----------|----------|
| 41.18434 | 988.8986 | 883.4578 | 24632.48 | 443.1338 | 6252.51  | 808.8624 | 1125.861 | 162.2352 | 278.3635 |
| 41.25546 | 989.1382 | 883.4754 | 24661.47 | 443.2358 | 6254.017 | 809.0488 | 1127.456 | 162.2932 | 278.421  |
| 41.32783 | 989.3892 | 883.1196 | 24690.93 | 443.3412 | 6255.559 | 809.241  | 1129.077 | 162.344  | 278.4713 |
| 41.38764 | 989.5848 | 883.4002 | 24715.24 | 443.4255 | 6256.816 | 809.3952 | 1130.416 | 162.3984 | 278.5253 |
| 41.43779 | 989.7405 | 884.0418 | 24735.6  | 443.4943 | 6257.859 | 809.5212 | 1131.538 | 162.4528 | 278.5792 |
| 41.49082 | 989.9127 | 884.332  | 24757.11 | 443.5687 | 6258.97  | 809.6573 | 1132.723 | 162.5019 | 278.6278 |
| 41.55628 | 990.1297 | 884.4594 | 24783.63 | 443.6615 | 6260.346 | 809.8269 | 1134.186 | 162.5574 | 278.6828 |
| 41.63075 | 990.383  | 884.2624 | 24813.76 | 443.7685 | 6261.918 | 810.0222 | 1135.848 | 162.6129 | 278.7379 |
| 41.68412 | 990.5523 | 884.7249 | 24835.32 | 443.8424 | 6263.028 | 810.1573 | 1137.038 | 162.6659 | 278.7904 |
| 41.73749 | 990.7247 | 885.0172 | 24856.85 | 443.9169 | 6264.141 | 810.2936 | 1138.227 | 162.715  | 278.8391 |
| 41.80237 | 990.9386 | 885.1473 | 24883.01 | 444.0084 | 6265.498 | 810.4608 | 1139.672 | 162.7698 | 278.8934 |
| 41.87587 | 991.1868 | 884.9856 | 24912.6  | 444.1134 | 6267.041 | 810.6524 | 1141.308 | 162.8251 | 278.9482 |
| 41.94273 | 991.4134 | 884.7798 | 24939.47 | 444.209  | 6268.445 | 810.8269 | 1142.794 | 162.874  | 278.9967 |
| 41.99681 | 991.5806 | 885.4064 | 24961.18 | 444.2825 | 6269.558 | 810.9617 | 1143.996 | 162.9308 | 279.053  |
| 42.04705 | 991.7385 | 885.8485 | 24981.32 | 444.3515 | 6270.595 | 811.0878 | 1145.111 | 162.9805 | 279.1022 |
| 42.10567 | 991.929  | 886.0466 | 25004.81 | 444.4333 | 6271.812 | 811.2374 | 1146.411 | 163.0315 | 279.1527 |
| 42.17679 | 992.1643 | 886.06   | 25033.26 | 444.5334 | 6273.292 | 811.4203 | 1147.988 | 163.0883 | 279.2091 |
| 42.24917 | 992.4109 | 885.6988 | 25062.18 | 444.6369 | 6274.805 | 811.6091 | 1149.591 | 163.1379 | 279.2582 |
| 42.30897 | 992.6029 | 885.9766 | 25086.04 | 444.7197 | 6276.039 | 811.7604 | 1150.914 | 163.1914 | 279.3112 |
| 42.35913 | 992.7556 | 886.617  | 25106.02 | 444.7871 | 6277.063 | 811.884  | 1152.023 | 163.245  | 279.3644 |
| 42.41216 | 992.9246 | 886.9049 | 25127.13 | 444.8602 | 6278.154 | 812.0176 | 1153.195 | 163.2932 | 279.4122 |
| 42.47761 | 993.1376 | 887.0287 | 25153.16 | 444.9513 | 6279.505 | 812.1841 | 1154.641 | 163.3477 | 279.4661 |
| 42.55209 | 993.3865 | 886.8267 | 25182.73 | 445.0564 | 6281.048 | 812.3759 | 1156.284 | 163.402  | 279.52   |
| 42.60546 | 993.5525 | 887.2873 | 25203.89 | 445.1288 | 6282.137 | 812.5084 | 1157.46  | 163.4541 | 279.5717 |
| 42.65883 | 993.7217 | 887.5772 | 25225.03 | 445.2019 | 6283.23  | 812.6422 | 1158.636 | 163.5024 | 279.6196 |
| 42.72371 | 993.9317 | 887.7039 | 25250.7  | 445.2917 | 6284.562 | 812.8063 | 1160.064 | 163.5562 | 279.6729 |
| 42.79721 | 994.1755 | 887.5373 | 25279.74 | 445.3948 | 6286.077 | 812.9944 | 1161.681 | 163.6103 | 279.7265 |
| 42.86407 | 994.3981 | 887.327  | 25306.12 | 445.4887 | 6287.455 | 813.1658 | 1163.151 | 163.6581 | 279.7739 |
| 42.91815 | 994.5621 | 887.9522 | 25327.43 | 445.5609 | 6288.548 | 813.298  | 1164.338 | 163.7141 | 279.8293 |
| 42.96839 | 994.717  | 888.3925 | 25347.2  | 445.6285 | 6289.566 | 813.4218 | 1165.44  | 163.763  | 279.8778 |
| 43.02701 | 994.9039 | 888.5877 | 25370.25 | 445.7088 | 6290.76  | 813.5685 | 1166.726 | 163.8131 | 279.9274 |
| 43.09813 | 995.135  | 888.5969 | 25398.18 | 445.8071 | 6292.213 | 813.7481 | 1168.284 | 163.8688 | 279.9826 |
| 43.17051 | 995.3773 | 888.2304 | 25426.56 | 445.9088 | 6293.699 | 813.9336 | 1169.869 | 163.9172 | 280.0306 |
| 43.23031 | 995.5657 | 888.5055 | 25449.98 | 445.99   | 6294.91  | 814.0821 | 1171.177 | 163.9697 | 280.0827 |

|          |          |          |          |          |          |          |          |          |          |
|----------|----------|----------|----------|----------|----------|----------|----------|----------|----------|
| 43.28047 | 995.7154 | 889.1448 | 25469.59 | 446.0561 | 6295.915 | 814.2033 | 1172.273 | 164.0226 | 280.1351 |
| 43.3335  | 995.8813 | 889.4304 | 25490.31 | 446.1278 | 6296.986 | 814.3344 | 1173.432 | 164.07   | 280.1821 |
| 43.39896 | 996.0904 | 889.5506 | 25515.85 | 446.2172 | 6298.312 | 814.4978 | 1174.861 | 164.1234 | 280.235  |
| 43.47343 | 996.3349 | 889.3437 | 25544.88 | 446.3204 | 6299.828 | 814.6861 | 1176.485 | 164.1766 | 280.2877 |
| 43.5268  | 996.4977 | 889.8025 | 25565.65 | 446.3915 | 6300.897 | 814.8162 | 1177.648 | 164.2278 | 280.3385 |
| 43.58017 | 996.6638 | 890.0901 | 25586.4  | 446.4632 | 6301.969 | 814.9474 | 1178.81  | 164.2753 | 280.3856 |
| 43.64505 | 996.87   | 890.2133 | 25611.59 | 446.5514 | 6303.277 | 815.1086 | 1180.222 | 164.3281 | 280.4379 |
| 43.71855 | 997.1094 | 890.042  | 25640.1  | 446.6526 | 6304.765 | 815.2933 | 1181.82  | 164.381  | 280.4904 |
| 43.78541 | 997.3282 | 889.8272 | 25665.99 | 446.7448 | 6306.118 | 815.4615 | 1183.273 | 164.4278 | 280.5367 |
| 43.8395  | 997.4889 | 890.451  | 25686.9  | 446.8156 | 6307.19  | 815.5912 | 1184.447 | 164.4829 | 280.5914 |
| 43.88973 | 997.6408 | 890.8896 | 25706.31 | 446.882  | 6308.189 | 815.7127 | 1185.536 | 164.5311 | 280.6391 |
| 43.94836 | 997.8243 | 891.082  | 25728.93 | 446.9608 | 6309.362 | 815.8567 | 1186.807 | 164.5802 | 280.6878 |
| 44.01948 | 998.0513 | 891.0871 | 25756.34 | 447.0573 | 6310.788 | 816.033  | 1188.348 | 164.6348 | 280.7419 |
| 44.09185 | 998.2894 | 890.7154 | 25784.2  | 447.1571 | 6312.247 | 816.2151 | 1189.914 | 164.6821 | 280.7888 |
| 44.15166 | 998.4743 | 890.9877 | 25807.18 | 447.2368 | 6313.436 | 816.3609 | 1191.207 | 164.7337 | 280.8399 |
| 44.20181 | 998.621  | 891.6259 | 25826.43 | 447.3017 | 6314.422 | 816.4798 | 1192.291 | 164.7858 | 280.8916 |
| 44.25484 | 998.7838 | 891.9093 | 25846.77 | 447.3721 | 6315.473 | 816.6084 | 1193.436 | 164.8324 | 280.9378 |
| 44.3203  | 998.9891 | 892.0261 | 25871.84 | 447.4599 | 6316.775 | 816.7688 | 1194.848 | 164.8848 | 280.9897 |
| 44.39477 | 999.2293 | 891.8143 | 25900.33 | 447.5612 | 6318.263 | 816.9538 | 1196.454 | 164.9368 | 281.0412 |
| 44.44815 | 999.389  | 892.2713 | 25920.72 | 447.6309 | 6319.313 | 817.0814 | 1197.603 | 164.9873 | 281.0913 |
| 44.50152 | 999.552  | 892.5567 | 25941.08 | 447.7013 | 6320.366 | 817.2102 | 1198.752 | 165.034  | 281.1375 |
| 44.5664  | 999.7544 | 892.6765 | 25965.81 | 447.7879 | 6321.65  | 817.3684 | 1200.147 | 165.0857 | 281.1888 |
| 44.6399  | 999.9896 | 892.5005 | 25993.79 | 447.8872 | 6323.11  | 817.5497 | 1201.727 | 165.1375 | 281.2402 |
| 44.70676 | 1000.205 | 892.2813 | 26019.2  | 447.9778 | 6324.438 | 817.7149 | 1203.163 | 165.1832 | 281.2855 |
| 44.76084 | 1000.362 | 892.9037 | 26039.73 | 448.0472 | 6325.491 | 817.8422 | 1204.323 | 165.2376 | 281.3394 |
| 44.81108 | 1000.511 | 893.3407 | 26058.77 | 448.1123 | 6326.472 | 817.9613 | 1205.4   | 165.285  | 281.3863 |
| 44.8697  | 1000.691 | 893.5303 | 26080.98 | 448.1897 | 6327.623 | 818.1027 | 1206.656 | 165.3332 | 281.4341 |
| 44.94082 | 1000.914 | 893.5313 | 26107.88 | 448.2844 | 6329.023 | 818.2758 | 1208.179 | 165.3867 | 281.4872 |
| 45.0132  | 1001.148 | 893.1546 | 26135.23 | 448.3825 | 6330.455 | 818.4546 | 1209.727 | 165.4328 | 281.5329 |
| 45.07301 | 1001.33  | 893.4243 | 26157.78 | 448.4607 | 6331.623 | 818.5977 | 1211.005 | 165.4835 | 281.5832 |
| 45.12316 | 1001.473 | 894.0614 | 26176.68 | 448.5244 | 6332.591 | 818.7143 | 1212.076 | 165.535  | 281.6341 |
| 45.17619 | 1001.633 | 894.3425 | 26196.64 | 448.5934 | 6333.622 | 818.8406 | 1213.208 | 165.5808 | 281.6795 |
| 45.24165 | 1001.835 | 894.456  | 26221.25 | 448.6796 | 6334.901 | 818.998  | 1214.604 | 165.6322 | 281.7304 |
| 45.31612 | 1002.071 | 894.2394 | 26249.21 | 448.7791 | 6336.362 | 819.1796 | 1216.191 | 165.683  | 281.7809 |

|          |          |          |          |          |          |          |          |          |          |
|----------|----------|----------|----------|----------|----------|----------|----------|----------|----------|
| 45.3695  | 1002.227 | 894.6947 | 26269.22 | 448.8475 | 6337.392 | 819.3048 | 1217.327 | 165.7327 | 281.8301 |
| 45.42287 | 1002.387 | 894.9778 | 26289.21 | 448.9166 | 6338.425 | 819.4312 | 1218.463 | 165.7786 | 281.8756 |
| 45.48775 | 1002.586 | 895.0943 | 26313.48 | 449.0015 | 6339.686 | 819.5865 | 1219.842 | 165.8294 | 281.9259 |
| 45.56125 | 1002.817 | 894.9137 | 26340.94 | 449.0991 | 6341.12  | 819.7646 | 1221.404 | 165.88   | 281.9761 |
| 45.62811 | 1003.028 | 894.6902 | 26365.88 | 449.188  | 6342.424 | 819.9268 | 1222.823 | 165.9247 | 282.0204 |
| 45.6822  | 1003.183 | 895.3113 | 26386.03 | 449.2561 | 6343.457 | 820.0516 | 1223.97  | 165.9783 | 282.0735 |
| 45.73243 | 1003.329 | 895.7466 | 26404.72 | 449.32   | 6344.419 | 820.1685 | 1225.034 | 166.0249 | 282.1197 |
| 45.79106 | 1003.506 | 895.9334 | 26426.52 | 449.3959 | 6345.549 | 820.3073 | 1226.276 | 166.0723 | 282.1667 |
| 45.86218 | 1003.725 | 895.9305 | 26452.92 | 449.489  | 6346.924 | 820.4772 | 1227.781 | 166.1247 | 282.2187 |
| 45.93455 | 1003.954 | 895.5488 | 26479.76 | 449.5853 | 6348.331 | 820.6529 | 1229.311 | 166.1698 | 282.2633 |
| 45.99436 | 1004.133 | 895.8159 | 26501.9  | 449.662  | 6349.477 | 820.7933 | 1230.574 | 166.2196 | 282.3127 |
| 46.04452 | 1004.274 | 896.4519 | 26520.45 | 449.7245 | 6350.426 | 820.9077 | 1231.633 | 166.2703 | 282.3629 |
| 46.09755 | 1004.43  | 896.7308 | 26540.04 | 449.7922 | 6351.439 | 821.0316 | 1232.752 | 166.3153 | 282.4076 |
| 46.163   | 1004.628 | 896.841  | 26564.19 | 449.8768 | 6352.694 | 821.1861 | 1234.131 | 166.3657 | 282.4575 |
| 46.23748 | 1004.86  | 896.6198 | 26591.64 | 449.9745 | 6354.128 | 821.3644 | 1235.7   | 166.4154 | 282.5068 |
| 46.29085 | 1005.014 | 897.0733 | 26611.28 | 450.0416 | 6355.14  | 821.4873 | 1236.823 | 166.4644 | 282.5553 |
| 46.34422 | 1005.171 | 897.3542 | 26630.9  | 450.1094 | 6356.154 | 821.6113 | 1237.945 | 166.5095 | 282.6    |
| 46.4091  | 1005.366 | 897.4675 | 26654.72 | 450.1928 | 6357.391 | 821.7637 | 1239.309 | 166.5593 | 282.6494 |
| 46.48261 | 1005.593 | 897.2825 | 26681.67 | 450.2886 | 6358.799 | 821.9386 | 1240.852 | 166.6088 | 282.6985 |
| 46.54947 | 1005.8   | 897.0547 | 26706.15 | 450.3759 | 6360.08  | 822.0979 | 1242.255 | 166.6525 | 282.7418 |
| 46.60355 | 1005.952 | 897.6744 | 26725.93 | 450.4428 | 6361.094 | 822.2203 | 1243.388 | 166.7053 | 282.7941 |
| 46.65379 | 1006.095 | 898.1082 | 26744.28 | 450.5054 | 6362.038 | 822.335  | 1244.44  | 166.7512 | 282.8396 |
| 46.71241 | 1006.269 | 898.2923 | 26765.67 | 450.5799 | 6363.148 | 822.4713 | 1245.667 | 166.7978 | 282.8858 |
| 46.78353 | 1006.483 | 898.2856 | 26791.59 | 450.6713 | 6364.497 | 822.6381 | 1247.155 | 166.8491 | 282.9367 |
| 46.85591 | 1006.709 | 897.8989 | 26817.93 | 450.7659 | 6365.879 | 822.8106 | 1248.667 | 166.8931 | 282.9802 |
| 46.91572 | 1006.884 | 898.1634 | 26839.66 | 450.8412 | 6367.004 | 822.9484 | 1249.916 | 166.942  | 283.0287 |
| 46.96587 | 1007.022 | 898.7984 | 26857.86 | 450.9024 | 6367.935 | 823.0606 | 1250.962 | 166.992  | 283.0783 |
| 47.01891 | 1007.176 | 899.0752 | 26877.09 | 450.9689 | 6368.93  | 823.1822 | 1252.068 | 167.0363 | 283.1222 |
| 47.08436 | 1007.371 | 899.1821 | 26900.8  | 451.0519 | 6370.162 | 823.3339 | 1253.432 | 167.0857 | 283.1712 |
| 47.15883 | 1007.598 | 898.9563 | 26927.73 | 451.1479 | 6371.57  | 823.509  | 1254.982 | 167.1344 | 283.2194 |
| 47.21221 | 1007.749 | 899.4081 | 26947.01 | 451.2137 | 6372.562 | 823.6295 | 1256.092 | 167.1825 | 283.2671 |
| 47.26558 | 1007.903 | 899.6869 | 26966.27 | 451.2803 | 6373.558 | 823.7512 | 1257.201 | 167.2269 | 283.3111 |
| 47.33046 | 1008.095 | 899.797  | 26989.65 | 451.3622 | 6374.773 | 823.9009 | 1258.549 | 167.2757 | 283.3595 |
| 47.40397 | 1008.318 | 899.6075 | 27016.1  | 451.4562 | 6376.155 | 824.0726 | 1260.074 | 167.3242 | 283.4075 |

|          |          |          |          |          |          |          |          |          |          |
|----------|----------|----------|----------|----------|----------|----------|----------|----------|----------|
| 47.47082 | 1008.521 | 899.3756 | 27040.13 | 451.542  | 6377.413 | 824.229  | 1261.46  | 167.3669 | 283.4499 |
| 47.52491 | 1008.67  | 899.994  | 27059.54 | 451.6075 | 6378.408 | 824.3491 | 1262.58  | 167.4189 | 283.5014 |
| 47.57515 | 1008.81  | 900.4263 | 27077.55 | 451.669  | 6379.335 | 824.4616 | 1263.62  | 167.4642 | 283.5463 |
| 47.63377 | 1008.981 | 900.6077 | 27098.54 | 451.7421 | 6380.424 | 824.5953 | 1264.833 | 167.5098 | 283.5915 |
| 47.70489 | 1009.192 | 900.5972 | 27123.98 | 451.8318 | 6381.749 | 824.7591 | 1266.303 | 167.5602 | 283.6414 |
| 47.77727 | 1009.414 | 900.2056 | 27149.84 | 451.9247 | 6383.105 | 824.9285 | 1267.798 | 167.603  | 283.6839 |
| 47.83708 | 1009.585 | 900.4677 | 27171.17 | 451.9986 | 6384.209 | 825.0637 | 1269.032 | 167.6511 | 283.7316 |
| 47.88724 | 1009.721 | 901.1016 | 27189.03 | 452.0587 | 6385.124 | 825.1738 | 1270.066 | 167.7005 | 283.7805 |
| 47.94027 | 1009.872 | 901.3763 | 27207.91 | 452.1239 | 6386.1   | 825.2931 | 1271.159 | 167.744  | 283.8236 |
| 48.00572 | 1010.063 | 901.4801 | 27231.18 | 452.2054 | 6387.309 | 825.442  | 1272.507 | 167.7925 | 283.8717 |
| 48.0802  | 1010.286 | 901.2497 | 27257.61 | 452.2996 | 6388.692 | 825.614  | 1274.039 | 167.84   | 283.9188 |
| 48.13357 | 1010.434 | 901.6999 | 27276.53 | 452.3642 | 6389.666 | 825.7322 | 1275.136 | 167.8874 | 283.9658 |
| 48.18694 | 1010.585 | 901.9766 | 27295.43 | 452.4296 | 6390.644 | 825.8517 | 1276.232 | 167.931  | 284.009  |
| 48.25182 | 1010.773 | 902.0835 | 27318.38 | 452.5099 | 6391.836 | 825.9986 | 1277.564 | 167.979  | 284.0565 |
| 48.32533 | 1010.992 | 901.8898 | 27344.35 | 452.6023 | 6393.194 | 826.1672 | 1279.071 | 168.0263 | 284.1035 |
| 48.39219 | 1011.193 | 901.6537 | 27367.93 | 452.6865 | 6394.428 | 826.3208 | 1280.441 | 168.0681 | 284.1448 |
| 48.44627 | 1011.338 | 902.2709 | 27386.98 | 452.7508 | 6395.405 | 826.4386 | 1281.548 | 168.1194 | 284.1957 |
| 48.49651 | 1011.476 | 902.7016 | 27404.66 | 452.8111 | 6396.315 | 826.549  | 1282.576 | 168.1639 | 284.2398 |
| 48.55514 | 1011.643 | 902.8804 | 27425.27 | 452.8829 | 6397.384 | 826.6802 | 1283.775 | 168.2088 | 284.2843 |
| 48.62626 | 1011.851 | 902.8661 | 27450.23 | 452.9709 | 6398.684 | 826.841  | 1285.227 | 168.2581 | 284.3332 |
| 48.69864 | 1012.069 | 902.4699 | 27475.61 | 453.0622 | 6400.016 | 827.0074 | 1286.705 | 168.2999 | 284.3746 |
| 48.75844 | 1012.237 | 902.7295 | 27496.55 | 453.1347 | 6401.1   | 827.1401 | 1287.924 | 168.3472 | 284.4215 |
| 48.8086  | 1012.37  | 903.3624 | 27514.08 | 453.1936 | 6401.998 | 827.248  | 1288.946 | 168.3958 | 284.4697 |
| 48.86163 | 1012.518 | 903.635  | 27532.61 | 453.2576 | 6402.956 | 827.3651 | 1290.026 | 168.4386 | 284.5121 |
| 48.92709 | 1012.705 | 903.7357 | 27555.44 | 453.3377 | 6404.143 | 827.5113 | 1291.358 | 168.4862 | 284.5592 |
| 49.00156 | 1012.925 | 903.5009 | 27581.39 | 453.4302 | 6405.501 | 827.6802 | 1292.872 | 168.5326 | 284.6053 |
| 49.05494 | 1013.07  | 903.9495 | 27599.96 | 453.4935 | 6406.457 | 827.7962 | 1293.956 | 168.5793 | 284.6516 |
| 49.10831 | 1013.218 | 904.2241 | 27618.51 | 453.5577 | 6407.416 | 827.9134 | 1295.04  | 168.6222 | 284.694  |
| 49.17319 | 1013.403 | 904.328  | 27641.04 | 453.6365 | 6408.587 | 828.0576 | 1296.356 | 168.6692 | 284.7407 |
| 49.2467  | 1013.618 | 904.1299 | 27666.52 | 453.7273 | 6409.92  | 828.2231 | 1297.846 | 168.7155 | 284.7866 |
| 49.31355 | 1013.815 | 903.8899 | 27689.67 | 453.8099 | 6411.132 | 828.374  | 1299.2   | 168.7563 | 284.827  |
| 49.36764 | 1013.958 | 904.5058 | 27708.37 | 453.873  | 6412.09  | 828.4895 | 1300.294 | 168.8069 | 284.8771 |
| 49.41788 | 1014.093 | 904.935  | 27725.72 | 453.9321 | 6412.983 | 828.5979 | 1301.31  | 168.8507 | 284.9206 |
| 49.47651 | 1014.257 | 905.1113 | 27745.95 | 454.0026 | 6414.033 | 828.7267 | 1302.494 | 168.8948 | 284.9643 |



|          |          |          |          |          |          |          |          |          |          |
|----------|----------|----------|----------|----------|----------|----------|----------|----------|----------|
| 49.54763 | 1014.461 | 905.0933 | 27770.45 | 454.089  | 6415.31  | 828.8845 | 1303.93  | 168.9431 | 285.0122 |
| 49.62    | 1014.675 | 904.6924 | 27795.36 | 454.1787 | 6416.618 | 829.0479 | 1305.39  | 168.9839 | 285.0526 |
| 49.67981 | 1014.84  | 904.9496 | 27815.91 | 454.2499 | 6417.682 | 829.1782 | 1306.595 | 169.0303 | 285.0986 |
| 49.72997 | 1014.97  | 905.5815 | 27833.12 | 454.3076 | 6418.563 | 829.2841 | 1307.605 | 169.0783 | 285.1462 |
| 49.783   | 1015.116 | 905.8521 | 27851.3  | 454.3705 | 6419.503 | 829.399  | 1308.672 | 169.1204 | 285.1878 |
| 49.84846 | 1015.3   | 905.9497 | 27873.72 | 454.449  | 6420.668 | 829.5425 | 1309.989 | 169.167  | 285.2341 |
| 49.92293 | 1015.516 | 905.7106 | 27899.19 | 454.5399 | 6422.001 | 829.7083 | 1311.485 | 169.2125 | 285.2791 |
| 49.97631 | 1015.658 | 906.1575 | 27917.41 | 454.602  | 6422.94  | 829.8221 | 1312.556 | 169.2584 | 285.3247 |
| 50.02968 | 1015.803 | 906.4301 | 27935.62 | 454.6649 | 6423.882 | 829.9372 | 1313.627 | 169.3006 | 285.3664 |
| 50.09456 | 1015.985 | 906.531  | 27957.73 | 454.7424 | 6425.031 | 830.0787 | 1314.928 | 169.3467 | 285.4122 |
| 50.16807 | 1016.196 | 906.3288 | 27982.74 | 454.8315 | 6426.339 | 830.2412 | 1316.4   | 169.392  | 285.4571 |
| 50.23493 | 1016.389 | 906.0848 | 28005.46 | 454.9126 | 6427.529 | 830.3893 | 1317.738 | 169.4319 | 285.4966 |
| 50.28901 | 1016.529 | 906.6995 | 28023.82 | 454.9745 | 6428.47  | 830.5027 | 1318.819 | 169.4817 | 285.546  |
| 50.33925 | 1016.662 | 907.1272 | 28040.84 | 455.0325 | 6429.347 | 830.609  | 1319.823 | 169.5249 | 285.5888 |
| 50.39788 | 1016.823 | 907.301  | 28060.7  | 455.1017 | 6430.377 | 830.7354 | 1320.993 | 169.5682 | 285.6317 |
| 50.469   | 1017.023 | 907.2794 | 28084.75 | 455.1866 | 6431.631 | 830.8904 | 1322.412 | 169.6155 | 285.6786 |
| 50.54138 | 1017.234 | 906.8739 | 28109.2  | 455.2746 | 6432.915 | 831.0509 | 1323.855 | 169.6553 | 285.718  |
| 50.60118 | 1017.396 | 907.1288 | 28129.37 | 455.3445 | 6433.959 | 831.1787 | 1325.046 | 169.7009 | 285.7632 |
| 50.65134 | 1017.523 | 907.7597 | 28146.26 | 455.4011 | 6434.824 | 831.2825 | 1326.044 | 169.7482 | 285.8102 |
| 50.70437 | 1017.666 | 908.0284 | 28164.1  | 455.4628 | 6435.747 | 831.3953 | 1327.099 | 169.7896 | 285.8511 |
| 50.76983 | 1017.846 | 908.1229 | 28186.11 | 455.5399 | 6436.891 | 831.5362 | 1328.399 | 169.8354 | 285.8965 |
| 50.84431 | 1018.059 | 907.8796 | 28211.11 | 455.6291 | 6438.2   | 831.699  | 1329.878 | 169.8798 | 285.9405 |
| 50.89768 | 1018.198 | 908.3249 | 28228.99 | 455.6901 | 6439.121 | 831.8107 | 1330.937 | 169.925  | 285.9854 |
| 50.95106 | 1018.341 | 908.5955 | 28246.87 | 455.7518 | 6440.046 | 831.9236 | 1331.995 | 169.9664 | 286.0264 |
| 51.01594 | 1018.519 | 908.6934 | 28268.56 | 455.8278 | 6441.174 | 832.0625 | 1333.28  | 170.0117 | 286.0713 |
| 51.08944 | 1018.726 | 908.4871 | 28293.12 | 455.9153 | 6442.458 | 832.2221 | 1334.735 | 170.056  | 286.1152 |
| 51.1563  | 1018.916 | 908.2393 | 28315.42 | 455.995  | 6443.627 | 832.3676 | 1336.057 | 170.0949 | 286.1538 |
| 51.21039 | 1019.053 | 908.8528 | 28333.43 | 456.0557 | 6444.55  | 832.4787 | 1337.126 | 170.1441 | 286.2025 |
| 51.26063 | 1019.184 | 909.279  | 28350.14 | 456.1126 | 6445.41  | 832.583  | 1338.118 | 170.1866 | 286.2447 |
| 51.31925 | 1019.342 | 909.4504 | 28369.63 | 456.1805 | 6446.422 | 832.7071 | 1339.274 | 170.2291 | 286.2868 |
| 51.39037 | 1019.538 | 909.4253 | 28393.24 | 456.2638 | 6447.653 | 832.8593 | 1340.676 | 170.2755 | 286.3327 |
| 51.46275 | 1019.745 | 909.0153 | 28417.23 | 456.3503 | 6448.913 | 833.0169 | 1342.102 | 170.3142 | 286.3712 |
| 51.52256 | 1019.904 | 909.2678 | 28437.03 | 456.4189 | 6449.939 | 833.1423 | 1343.279 | 170.3591 | 286.4156 |
| 51.57272 | 1020.029 | 909.8978 | 28453.61 | 456.4744 | 6450.787 | 833.2442 | 1344.265 | 170.4058 | 286.4619 |

|          |          |          |          |          |          |          |          |          |          |
|----------|----------|----------|----------|----------|----------|----------|----------|----------|----------|
| 51.62575 | 1020.169 | 910.1645 | 28471.12 | 456.5349 | 6451.693 | 833.3548 | 1345.307 | 170.4464 | 286.5022 |
| 51.69121 | 1020.346 | 910.2561 | 28492.72 | 456.6106 | 6452.817 | 833.4931 | 1346.593 | 170.4913 | 286.5467 |
| 51.76568 | 1020.555 | 910.0085 | 28517.25 | 456.6982 | 6454.102 | 833.653  | 1348.054 | 170.5347 | 286.5897 |
| 51.81906 | 1020.692 | 910.4524 | 28534.81 | 456.7581 | 6455.006 | 833.7626 | 1349.1   | 170.5793 | 286.6339 |
| 51.87243 | 1020.832 | 910.721  | 28552.35 | 456.8187 | 6455.913 | 833.8734 | 1350.146 | 170.62   | 286.6742 |
| 51.93731 | 1021.007 | 910.816  | 28573.65 | 456.8933 | 6457.021 | 834.0097 | 1351.416 | 170.6644 | 286.7183 |
| 52.01082 | 1021.211 | 910.6057 | 28597.75 | 456.9792 | 6458.282 | 834.1665 | 1352.854 | 170.7077 | 286.7612 |
| 52.07768 | 1021.397 | 910.3541 | 28619.64 | 457.0575 | 6459.429 | 834.3093 | 1354.16  | 170.7458 | 286.7989 |
| 52.13177 | 1021.532 | 910.9664 | 28637.32 | 457.117  | 6460.335 | 834.4184 | 1355.216 | 170.7943 | 286.8469 |
| 52.182   | 1021.659 | 911.3912 | 28653.72 | 457.1728 | 6461.18  | 834.5207 | 1356.196 | 170.8361 | 286.8884 |
| 52.24063 | 1021.814 | 911.5601 | 28672.85 | 457.2395 | 6462.172 | 834.6425 | 1357.339 | 170.8778 | 286.9298 |
| 52.31175 | 1022.007 | 911.5316 | 28696.02 | 457.3213 | 6463.381 | 834.7918 | 1358.725 | 170.9233 | 286.9748 |
| 52.38413 | 1022.211 | 911.1172 | 28719.57 | 457.4062 | 6464.619 | 834.9466 | 1360.133 | 170.9611 | 287.0123 |
| 52.44394 | 1022.367 | 911.3674 | 28739    | 457.4735 | 6465.625 | 835.0698 | 1361.296 | 171.0051 | 287.056  |
| 52.4941  | 1022.489 | 911.9965 | 28755.27 | 457.528  | 6466.458 | 835.1696 | 1362.271 | 171.0512 | 287.1016 |
| 52.54713 | 1022.627 | 912.2612 | 28772.46 | 457.5873 | 6467.347 | 835.2782 | 1363.301 | 171.0911 | 287.1412 |
| 52.61259 | 1022.801 | 912.3499 | 28793.66 | 457.6616 | 6468.45  | 835.414  | 1364.571 | 171.1352 | 287.1849 |
| 52.68706 | 1023.005 | 912.0983 | 28817.74 | 457.7477 | 6469.712 | 835.571  | 1366.015 | 171.1776 | 287.2269 |
| 52.74044 | 1023.14  | 912.5406 | 28834.98 | 457.8064 | 6470.599 | 835.6785 | 1367.049 | 171.2215 | 287.2704 |
| 52.79381 | 1023.277 | 912.8073 | 28852.19 | 457.8658 | 6471.49  | 835.7872 | 1368.082 | 171.2615 | 287.3101 |
| 52.8587  | 1023.449 | 912.8995 | 28873.1  | 457.9391 | 6472.577 | 835.9211 | 1369.337 | 171.3051 | 287.3533 |
| 52.9322  | 1023.649 | 912.6852 | 28896.75 | 458.0234 | 6473.816 | 836.075  | 1370.757 | 171.3475 | 287.3952 |
| 52.99906 | 1023.832 | 912.4299 | 28918.23 | 458.1003 | 6474.942 | 836.2152 | 1372.048 | 171.3846 | 287.4321 |
| 53.05315 | 1023.964 | 913.041  | 28935.58 | 458.1587 | 6475.831 | 836.3222 | 1373.092 | 171.4324 | 287.4794 |
| 53.10339 | 1024.089 | 913.4644 | 28951.69 | 458.2135 | 6476.66  | 836.4226 | 1374.06  | 171.4736 | 287.5203 |
| 53.16201 | 1024.242 | 913.6309 | 28970.46 | 458.2789 | 6477.635 | 836.5421 | 1375.189 | 171.5146 | 287.5609 |
| 53.23314 | 1024.431 | 913.599  | 28993.2  | 458.3592 | 6478.821 | 836.6888 | 1376.558 | 171.5591 | 287.605  |
| 53.30551 | 1024.631 | 913.1803 | 29016.32 | 458.4426 | 6480.037 | 836.8408 | 1377.951 | 171.5959 | 287.6415 |
| 53.36532 | 1024.784 | 913.4283 | 29035.39 | 458.5086 | 6481.025 | 836.9617 | 1379.1   | 171.6393 | 287.6845 |
| 53.41548 | 1024.904 | 914.0564 | 29051.36 | 458.5621 | 6481.842 | 837.0596 | 1380.063 | 171.6847 | 287.7295 |
| 53.46851 | 1025.039 | 914.3193 | 29068.23 | 458.6203 | 6482.715 | 837.1662 | 1381.08  | 171.724  | 287.7684 |
| 53.53397 | 1025.21  | 914.4051 | 29089.04 | 458.6933 | 6483.797 | 837.2994 | 1382.335 | 171.7672 | 287.8113 |
| 53.60845 | 1025.411 | 914.1495 | 29112.68 | 458.7777 | 6485.036 | 837.4536 | 1383.762 | 171.8086 | 287.8523 |
| 53.66182 | 1025.543 | 914.5903 | 29129.59 | 458.8353 | 6485.907 | 837.5591 | 1384.783 | 171.8519 | 287.8952 |

|          |          |          |          |          |          |          |          |          |          |
|----------|----------|----------|----------|----------|----------|----------|----------|----------|----------|
| 53.7152  | 1025.678 | 914.8552 | 29146.49 | 458.8937 | 6486.781 | 837.6658 | 1385.804 | 171.8912 | 287.9342 |
| 53.78008 | 1025.846 | 914.9445 | 29167.01 | 458.9656 | 6487.849 | 837.7972 | 1387.044 | 171.934  | 287.9766 |
| 53.85359 | 1026.043 | 914.7263 | 29190.22 | 459.0484 | 6489.065 | 837.9483 | 1388.448 | 171.9754 | 288.0176 |
| 53.92045 | 1026.223 | 914.4674 | 29211.31 | 459.1239 | 6490.17  | 838.086  | 1389.724 | 172.0116 | 288.0536 |
| 53.97453 | 1026.352 | 915.0774 | 29228.34 | 459.1812 | 6491.043 | 838.191  | 1390.754 | 172.0588 | 288.1003 |
| 54.02477 | 1026.475 | 915.4994 | 29244.14 | 459.2349 | 6491.857 | 838.2894 | 1391.711 | 172.0994 | 288.1405 |
| 54.0834  | 1026.624 | 915.6636 | 29262.57 | 459.2991 | 6492.813 | 838.4068 | 1392.827 | 172.1396 | 288.1804 |
| 54.15452 | 1026.81  | 915.6283 | 29284.89 | 459.378  | 6493.978 | 838.5507 | 1394.18  | 172.1832 | 288.2236 |
| 54.2269  | 1027.007 | 915.2054 | 29307.58 | 459.4599 | 6495.172 | 838.7001 | 1395.556 | 172.2191 | 288.2592 |
| 54.28671 | 1027.157 | 915.4512 | 29326.3  | 459.5247 | 6496.142 | 838.8187 | 1396.691 | 172.2617 | 288.3014 |
| 54.33687 | 1027.275 | 916.0784 | 29341.97 | 459.5771 | 6496.943 | 838.9147 | 1397.642 | 172.3065 | 288.3458 |
| 54.3899  | 1027.407 | 916.3395 | 29358.53 | 459.6343 | 6497.8   | 839.0193 | 1398.648 | 172.3451 | 288.3841 |
| 54.45536 | 1027.575 | 916.4225 | 29378.95 | 459.7059 | 6498.863 | 839.1501 | 1399.888 | 172.3875 | 288.4261 |
| 54.52983 | 1027.773 | 916.1629 | 29402.16 | 459.7888 | 6500.079 | 839.3015 | 1401.298 | 172.428  | 288.4662 |
| 54.58321 | 1027.902 | 916.6022 | 29418.76 | 459.8453 | 6500.934 | 839.405  | 1402.307 | 172.4706 | 288.5084 |
| 54.63659 | 1028.034 | 916.8653 | 29435.34 | 459.9026 | 6501.792 | 839.5097 | 1403.316 | 172.5093 | 288.5468 |
| 54.70147 | 1028.199 | 916.9519 | 29455.48 | 459.9732 | 6502.84  | 839.6387 | 1404.541 | 172.5512 | 288.5884 |
| 54.77497 | 1028.393 | 916.7299 | 29478.27 | 460.0545 | 6504.034 | 839.7871 | 1405.928 | 172.5917 | 288.6285 |
| 54.84183 | 1028.57  | 916.4673 | 29498.96 | 460.1287 | 6505.12  | 839.9224 | 1407.188 | 172.6271 | 288.6636 |
| 54.89592 | 1028.696 | 917.0762 | 29515.68 | 460.1848 | 6505.976 | 840.0253 | 1408.207 | 172.6736 | 288.7097 |
| 54.94616 | 1028.817 | 917.4969 | 29531.19 | 460.2375 | 6506.775 | 840.1219 | 1409.152 | 172.7136 | 288.7493 |
| 55.00479 | 1028.964 | 917.6588 | 29549.27 | 460.3005 | 6507.714 | 840.237  | 1410.255 | 172.7531 | 288.7884 |
| 55.07591 | 1029.146 | 917.6203 | 29571.18 | 460.378  | 6508.857 | 840.3784 | 1411.591 | 172.7958 | 288.8308 |
| 55.14829 | 1029.339 | 917.1932 | 29593.45 | 460.4584 | 6510.029 | 840.525  | 1412.95  | 172.8308 | 288.8654 |
| 55.2081  | 1029.487 | 917.4368 | 29611.83 | 460.522  | 6510.981 | 840.6414 | 1414.072 | 172.8726 | 288.9069 |
| 55.25826 | 1029.602 | 918.0631 | 29627.21 | 460.5734 | 6511.768 | 840.7356 | 1415.012 | 172.9168 | 288.9508 |
| 55.31129 | 1029.732 | 918.3224 | 29643.47 | 460.6295 | 6512.609 | 840.8383 | 1416.006 | 172.9548 | 288.9884 |
| 55.37675 | 1029.897 | 918.4027 | 29663.51 | 460.6998 | 6513.653 | 840.9667 | 1417.231 | 172.9964 | 289.0296 |
| 55.45123 | 1030.091 | 918.1392 | 29686.28 | 460.7813 | 6514.847 | 841.1153 | 1418.624 | 173.0359 | 289.0688 |
| 55.5046  | 1030.217 | 918.5771 | 29702.58 | 460.8367 | 6515.686 | 841.2168 | 1419.621 | 173.0779 | 289.1104 |
| 55.55798 | 1030.347 | 918.8383 | 29718.86 | 460.8929 | 6516.528 | 841.3196 | 1420.618 | 173.1159 | 289.1481 |
| 55.62286 | 1030.51  | 918.9222 | 29738.62 | 460.9622 | 6517.557 | 841.4462 | 1421.828 | 173.1571 | 289.1888 |
| 55.69637 | 1030.7   | 918.6965 | 29760.99 | 461.0421 | 6518.729 | 841.592  | 1423.198 | 173.1966 | 289.228  |
| 55.76323 | 1030.874 | 918.4304 | 29781.3  | 461.1149 | 6519.795 | 841.7248 | 1424.444 | 173.2312 | 289.2623 |

|          |          |          |          |          |          |          |          |          |          |
|----------|----------|----------|----------|----------|----------|----------|----------|----------|----------|
| 55.81731 | 1030.998 | 919.0382 | 29797.71 | 461.1699 | 6520.636 | 841.8257 | 1425.45  | 173.2771 | 289.3078 |
| 55.86755 | 1031.116 | 919.4576 | 29812.93 | 461.2217 | 6521.419 | 841.9205 | 1426.384 | 173.3165 | 289.3468 |
| 55.92618 | 1031.26  | 919.6173 | 29830.68 | 461.2835 | 6522.341 | 842.0335 | 1427.474 | 173.3552 | 289.3853 |
| 55.9973  | 1031.439 | 919.5755 | 29852.19 | 461.3595 | 6523.464 | 842.1723 | 1428.794 | 173.3971 | 289.4267 |
| 56.06968 | 1031.629 | 919.1443 | 29874.04 | 461.4385 | 6524.615 | 842.3164 | 1430.137 | 173.4311 | 289.4605 |
| 56.12949 | 1031.774 | 919.3858 | 29892.08 | 461.501  | 6525.549 | 842.4306 | 1431.245 | 173.4722 | 289.5013 |
| 56.17965 | 1031.887 | 920.0113 | 29907.18 | 461.5514 | 6526.321 | 842.523  | 1432.174 | 173.5159 | 289.5445 |
| 56.23269 | 1032.014 | 920.2687 | 29923.13 | 461.6064 | 6527.147 | 842.6237 | 1433.156 | 173.5532 | 289.5815 |
| 56.29815 | 1032.176 | 920.3463 | 29942.8  | 461.6754 | 6528.171 | 842.7497 | 1434.366 | 173.594  | 289.622  |
| 56.37262 | 1032.367 | 920.079  | 29965.16 | 461.7554 | 6529.344 | 842.8957 | 1435.742 | 173.6327 | 289.6602 |
| 56.426   | 1032.491 | 920.5155 | 29981.15 | 461.8098 | 6530.167 | 842.9953 | 1436.728 | 173.674  | 289.7012 |
| 56.47937 | 1032.618 | 920.775  | 29997.13 | 461.8649 | 6530.994 | 843.0962 | 1437.712 | 173.7114 | 289.7383 |
| 56.54426 | 1032.777 | 920.8562 | 30016.53 | 461.933  | 6532.004 | 843.2205 | 1438.908 | 173.7517 | 289.7783 |
| 56.61776 | 1032.964 | 920.6268 | 30038.48 | 462.0114 | 6533.155 | 843.3636 | 1440.262 | 173.7904 | 289.8166 |
| 56.68462 | 1033.135 | 920.3573 | 30058.42 | 462.0829 | 6534.201 | 843.494  | 1441.492 | 173.8241 | 289.85   |
| 56.73871 | 1033.257 | 920.964  | 30074.52 | 462.1369 | 6535.026 | 843.593  | 1442.487 | 173.8694 | 289.8949 |
| 56.78895 | 1033.372 | 921.3821 | 30089.46 | 462.1877 | 6535.795 | 843.686  | 1443.41  | 173.9082 | 289.9334 |
| 56.84758 | 1033.514 | 921.5396 | 30106.88 | 462.2484 | 6536.7   | 843.7969 | 1444.486 | 173.9463 | 289.9711 |
| 56.9187  | 1033.69  | 921.4947 | 30127.99 | 462.323  | 6537.802 | 843.9332 | 1445.791 | 173.9873 | 290.0117 |
| 56.99108 | 1033.877 | 921.0594 | 30149.45 | 462.4006 | 6538.932 | 844.0747 | 1447.117 | 174.0204 | 290.0446 |
| 57.05089 | 1034.019 | 921.2989 | 30167.14 | 462.4619 | 6539.85  | 844.1868 | 1448.212 | 174.0608 | 290.0846 |
| 57.10105 | 1034.129 | 921.9235 | 30181.97 | 462.5113 | 6540.607 | 844.2774 | 1449.13  | 174.1039 | 290.1273 |
| 57.15408 | 1034.254 | 922.1792 | 30197.63 | 462.5653 | 6541.418 | 844.3762 | 1450.1   | 174.1406 | 290.1637 |
| 57.21954 | 1034.413 | 922.2542 | 30216.94 | 462.633  | 6542.423 | 844.4999 | 1451.296 | 174.1806 | 290.2034 |
| 57.29402 | 1034.601 | 921.9831 | 30238.87 | 462.7116 | 6543.575 | 844.6433 | 1452.655 | 174.2184 | 290.2408 |
| 57.34739 | 1034.722 | 922.4182 | 30254.57 | 462.765  | 6544.383 | 844.741  | 1453.628 | 174.259  | 290.2811 |
| 57.40077 | 1034.847 | 922.6759 | 30270.25 | 462.8191 | 6545.194 | 844.84   | 1454.601 | 174.2958 | 290.3176 |
| 57.46565 | 1035.004 | 922.7546 | 30289.3  | 462.8858 | 6546.186 | 844.962  | 1455.783 | 174.3354 | 290.3568 |
| 57.53916 | 1035.187 | 922.5216 | 30310.84 | 462.9629 | 6547.316 | 845.1025 | 1457.12  | 174.3732 | 290.3942 |
| 57.60602 | 1035.355 | 922.2487 | 30330.41 | 463.0331 | 6548.343 | 845.2306 | 1458.336 | 174.4061 | 290.4269 |
| 57.66011 | 1035.474 | 922.8543 | 30346.22 | 463.086  | 6549.153 | 845.3277 | 1459.318 | 174.4508 | 290.4711 |
| 57.71035 | 1035.588 | 923.2712 | 30360.88 | 463.1358 | 6549.908 | 845.4189 | 1460.23  | 174.489  | 290.509  |
| 57.76898 | 1035.727 | 923.4265 | 30377.98 | 463.1954 | 6550.796 | 845.5278 | 1461.293 | 174.5264 | 290.5461 |
| 57.8401  | 1035.9   | 923.3784 | 30398.7  | 463.2687 | 6551.878 | 845.6615 | 1462.582 | 174.5665 | 290.5859 |

|          |          |          |          |          |          |          |          |          |          |
|----------|----------|----------|----------|----------|----------|----------|----------|----------|----------|
| 57.91248 | 1036.083 | 922.9393 | 30419.76 | 463.3449 | 6552.988 | 845.8005 | 1463.893 | 174.5988 | 290.6179 |
| 57.97229 | 1036.223 | 923.1767 | 30437.13 | 463.4051 | 6553.888 | 845.9105 | 1464.975 | 174.6385 | 290.6573 |
| 58.02245 | 1036.331 | 923.8005 | 30451.68 | 463.4535 | 6554.632 | 845.9994 | 1465.881 | 174.6811 | 290.6994 |
| 58.07548 | 1036.453 | 924.0545 | 30467.05 | 463.5065 | 6555.427 | 846.0964 | 1466.839 | 174.7172 | 290.7352 |
| 58.14094 | 1036.609 | 924.1268 | 30486    | 463.573  | 6556.414 | 846.2178 | 1468.021 | 174.7564 | 290.7741 |
| 58.21542 | 1036.794 | 923.8521 | 30507.53 | 463.6502 | 6557.544 | 846.3586 | 1469.364 | 174.7932 | 290.8106 |
| 58.2688  | 1036.913 | 924.2859 | 30522.94 | 463.7025 | 6558.338 | 846.4545 | 1470.326 | 174.8333 | 290.8503 |
| 58.32217 | 1037.036 | 924.5418 | 30538.33 | 463.7556 | 6559.134 | 846.5516 | 1471.287 | 174.8695 | 290.8862 |
| 58.38706 | 1037.189 | 924.6179 | 30557.02 | 463.8211 | 6560.108 | 846.6714 | 1472.454 | 174.9083 | 290.9247 |
| 58.46056 | 1037.369 | 924.3814 | 30578.17 | 463.8968 | 6561.217 | 846.8093 | 1473.776 | 174.9452 | 290.9612 |
| 58.52742 | 1037.534 | 924.1052 | 30597.37 | 463.9658 | 6562.226 | 846.9352 | 1474.976 | 174.9774 | 290.9931 |
| 58.58151 | 1037.651 | 924.7098 | 30612.89 | 464.0177 | 6563.02  | 847.0304 | 1475.947 | 175.0214 | 291.0367 |
| 58.63175 | 1037.762 | 925.1254 | 30627.28 | 464.0665 | 6563.761 | 847.1198 | 1476.848 | 175.0591 | 291.0741 |
| 58.69038 | 1037.899 | 925.2786 | 30644.07 | 464.125  | 6564.633 | 847.2267 | 1477.898 | 175.0958 | 291.1105 |
| 58.7615  | 1038.069 | 925.2275 | 30664.4  | 464.1969 | 6565.696 | 847.3581 | 1479.172 | 175.1351 | 291.1494 |
| 58.83388 | 1038.249 | 924.7845 | 30685.07 | 464.2718 | 6566.785 | 847.4946 | 1480.466 | 175.1666 | 291.1806 |
| 58.89369 | 1038.386 | 925.0199 | 30702.12 | 464.3308 | 6567.669 | 847.6025 | 1481.535 | 175.2056 | 291.2193 |
| 58.94385 | 1038.492 | 925.6428 | 30716.4  | 464.3783 | 6568.399 | 847.6897 | 1482.431 | 175.2476 | 291.2609 |
| 58.99689 | 1038.612 | 925.8952 | 30731.49 | 464.4304 | 6569.179 | 847.7849 | 1483.377 | 175.2831 | 291.2961 |
| 59.06235 | 1038.765 | 925.9649 | 30750.09 | 464.4956 | 6570.148 | 847.9041 | 1484.544 | 175.3216 | 291.3342 |
| 59.13682 | 1038.946 | 925.6866 | 30771.22 | 464.5714 | 6571.258 | 848.0423 | 1485.871 | 175.3575 | 291.3699 |
| 59.1902  | 1039.063 | 926.1191 | 30786.34 | 464.6228 | 6572.037 | 848.1364 | 1486.821 | 175.397  | 291.409  |
| 59.24358 | 1039.184 | 926.3734 | 30801.45 | 464.6749 | 6572.819 | 848.2317 | 1487.771 | 175.4326 | 291.4443 |
| 59.30846 | 1039.334 | 926.447  | 30819.79 | 464.7392 | 6573.774 | 848.3492 | 1488.924 | 175.4707 | 291.482  |
| 59.38197 | 1039.512 | 926.207  | 30840.55 | 464.8135 | 6574.863 | 848.4847 | 1490.229 | 175.5067 | 291.5178 |
| 59.44883 | 1039.674 | 925.9275 | 30859.4  | 464.8812 | 6575.854 | 848.6083 | 1491.416 | 175.5381 | 291.5489 |
| 59.50292 | 1039.788 | 926.531  | 30874.63 | 464.9321 | 6576.634 | 848.7017 | 1492.374 | 175.5815 | 291.5919 |
| 59.55316 | 1039.897 | 926.9454 | 30888.76 | 464.9801 | 6577.361 | 848.7894 | 1493.264 | 175.6187 | 291.6287 |
| 59.61179 | 1040.031 | 927.0965 | 30905.23 | 465.0374 | 6578.217 | 848.8943 | 1494.302 | 175.6547 | 291.6644 |
| 59.68291 | 1040.198 | 927.0425 | 30925.19 | 465.1081 | 6579.26  | 849.0233 | 1495.56  | 175.6932 | 291.7026 |
| 59.75529 | 1040.375 | 926.5956 | 30945.48 | 465.1816 | 6580.329 | 849.1574 | 1496.839 | 175.7238 | 291.7329 |
| 59.8151  | 1040.509 | 926.8291 | 30962.21 | 465.2396 | 6581.197 | 849.2633 | 1497.895 | 175.7622 | 291.771  |
| 59.86526 | 1040.613 | 927.4512 | 30976.23 | 465.2861 | 6581.913 | 849.3488 | 1498.78  | 175.8036 | 291.812  |
| 59.91829 | 1040.731 | 927.7019 | 30991.03 | 465.3372 | 6582.679 | 849.4422 | 1499.715 | 175.8385 | 291.8466 |

|          |          |          |          |          |          |          |          |          |          |
|----------|----------|----------|----------|----------|----------|----------|----------|----------|----------|
| 59.98375 | 1040.882 | 927.7692 | 31009.29 | 465.4012 | 6583.631 | 849.5592 | 1500.868 | 175.8763 | 291.884  |
| 60.05823 | 1041.06  | 927.4873 | 31030.03 | 465.4757 | 6584.72  | 849.695  | 1502.179 | 175.9114 | 291.9188 |
| 60.11161 | 1041.174 | 927.9185 | 31044.88 | 465.526  | 6585.484 | 849.7872 | 1503.117 | 175.9503 | 291.9574 |
| 60.16498 | 1041.292 | 928.1711 | 31059.71 | 465.5772 | 6586.252 | 849.8808 | 1504.055 | 175.9853 | 291.9921 |
| 60.22987 | 1041.44  | 928.2422 | 31077.71 | 465.6403 | 6587.19  | 849.9961 | 1505.194 | 176.0226 | 292.0291 |
| 60.30337 | 1041.614 | 927.9989 | 31098.08 | 465.7133 | 6588.259 | 850.1292 | 1506.484 | 176.0578 | 292.064  |
| 60.37023 | 1041.774 | 927.7162 | 31116.59 | 465.7798 | 6589.232 | 850.2506 | 1507.656 | 176.0885 | 292.0944 |
| 60.42432 | 1041.886 | 928.3187 | 31131.53 | 465.8297 | 6589.997 | 850.3421 | 1508.603 | 176.1313 | 292.1368 |
| 60.47457 | 1041.993 | 928.7319 | 31145.4  | 465.8767 | 6590.711 | 850.4283 | 1509.482 | 176.1679 | 292.1731 |
| 60.53319 | 1042.124 | 928.8809 | 31161.57 | 465.9331 | 6591.551 | 850.5312 | 1510.507 | 176.2033 | 292.2082 |
| 60.60432 | 1042.288 | 928.8239 | 31181.16 | 466.0024 | 6592.575 | 850.6578 | 1511.75  | 176.241  | 292.2456 |
| 60.6767  | 1042.462 | 928.3734 | 31201.07 | 466.0747 | 6593.625 | 850.7895 | 1513.013 | 176.2708 | 292.2751 |
| 60.73651 | 1042.594 | 928.6049 | 31217.49 | 466.1315 | 6594.477 | 850.8935 | 1514.056 | 176.3085 | 292.3124 |
| 60.78667 | 1042.696 | 929.2263 | 31231.25 | 466.1772 | 6595.179 | 850.9773 | 1514.93  | 176.3494 | 292.353  |
| 60.8397  | 1042.812 | 929.4753 | 31245.79 | 466.2273 | 6595.932 | 851.0689 | 1515.854 | 176.3837 | 292.387  |
| 60.90516 | 1042.959 | 929.5402 | 31263.7  | 466.2902 | 6596.866 | 851.1838 | 1516.993 | 176.4208 | 292.4237 |
| 60.97964 | 1043.134 | 929.2549 | 31284.06 | 466.3633 | 6597.935 | 851.3172 | 1518.288 | 176.455  | 292.4577 |
| 61.03302 | 1043.246 | 929.6847 | 31298.63 | 466.4127 | 6598.685 | 851.4076 | 1519.215 | 176.4934 | 292.4957 |
| 61.0864  | 1043.362 | 929.9357 | 31313.19 | 466.4628 | 6599.439 | 851.4994 | 1520.141 | 176.5278 | 292.5298 |
| 61.15128 | 1043.508 | 930.0044 | 31330.86 | 466.5248 | 6600.359 | 851.6127 | 1521.267 | 176.5644 | 292.5661 |
| 61.22478 | 1043.679 | 929.7577 | 31350.85 | 466.5965 | 6601.409 | 851.7434 | 1522.541 | 176.5988 | 292.6002 |
| 61.29165 | 1043.835 | 929.4719 | 31369.02 | 466.6618 | 6602.365 | 851.8626 | 1523.698 | 176.6287 | 292.6298 |
| 61.34574 | 1043.945 | 930.0734 | 31383.69 | 466.7108 | 6603.115 | 851.9524 | 1524.634 | 176.671  | 292.6717 |
| 61.39598 | 1044.05  | 930.4854 | 31397.3  | 466.7569 | 6603.816 | 852.0368 | 1525.502 | 176.707  | 292.7074 |
| 61.45461 | 1044.179 | 930.6325 | 31413.17 | 466.8122 | 6604.64  | 852.1379 | 1526.515 | 176.7418 | 292.7419 |
| 61.52573 | 1044.34  | 930.5726 | 31432.39 | 466.8802 | 6605.646 | 852.2622 | 1527.742 | 176.7787 | 292.7785 |
| 61.59811 | 1044.511 | 930.1184 | 31451.94 | 466.9512 | 6606.677 | 852.3916 | 1528.991 | 176.8077 | 292.8072 |
| 61.65792 | 1044.64  | 930.348  | 31468.06 | 467.007  | 6607.513 | 852.4936 | 1530.021 | 176.8447 | 292.8439 |
| 61.70808 | 1044.74  | 930.9686 | 31481.56 | 467.0518 | 6608.202 | 852.5758 | 1530.884 | 176.8851 | 292.8839 |
| 61.76112 | 1044.854 | 931.2161 | 31495.83 | 467.1009 | 6608.941 | 852.6657 | 1531.796 | 176.9189 | 292.9174 |
| 61.82658 | 1044.999 | 931.2785 | 31513.41 | 467.1627 | 6609.858 | 852.7785 | 1532.922 | 176.9552 | 292.9534 |
| 61.90105 | 1045.17  | 930.9898 | 31533.4  | 467.2345 | 6610.908 | 852.9094 | 1534.201 | 176.9886 | 292.9866 |
| 61.95443 | 1045.281 | 931.4183 | 31547.7  | 467.2829 | 6611.644 | 852.9982 | 1535.117 | 177.0264 | 293.024  |
| 62.00781 | 1045.394 | 931.6678 | 31561.98 | 467.3322 | 6612.384 | 853.0883 | 1536.032 | 177.0602 | 293.0576 |

|          |          |          |          |          |          |          |          |          |          |
|----------|----------|----------|----------|----------|----------|----------|----------|----------|----------|
| 62.07269 | 1045.537 | 931.7341 | 31579.33 | 467.393  | 6613.287 | 853.1994 | 1537.143 | 177.0962 | 293.0932 |
| 62.1462  | 1045.705 | 931.4841 | 31598.95 | 467.4634 | 6614.318 | 853.3278 | 1538.402 | 177.1298 | 293.1265 |
| 62.21306 | 1045.859 | 931.1952 | 31616.78 | 467.5275 | 6615.256 | 853.4448 | 1539.545 | 177.1589 | 293.1554 |
| 62.26715 | 1045.966 | 931.7958 | 31631.18 | 467.5756 | 6615.993 | 853.5329 | 1540.469 | 177.2006 | 293.1967 |
| 62.31739 | 1046.069 | 932.2066 | 31644.54 | 467.6208 | 6616.68  | 853.6158 | 1541.327 | 177.2362 | 293.2319 |
| 62.37602 | 1046.196 | 932.3517 | 31660.11 | 467.675  | 6617.49  | 853.7149 | 1542.328 | 177.2703 | 293.2657 |
| 62.44714 | 1046.354 | 932.289  | 31678.99 | 467.7419 | 6618.477 | 853.837  | 1543.54  | 177.3065 | 293.3016 |
| 62.51952 | 1046.522 | 931.8312 | 31698.17 | 467.8116 | 6619.49  | 853.964  | 1544.773 | 177.3346 | 293.3295 |
| 62.57933 | 1046.649 | 932.059  | 31713.99 | 467.8664 | 6620.31  | 854.0642 | 1545.791 | 177.3711 | 293.3656 |
| 62.6295  | 1046.747 | 932.6788 | 31727.24 | 467.9103 | 6620.987 | 854.1447 | 1546.644 | 177.4109 | 293.4051 |
| 62.68253 | 1046.858 | 932.9247 | 31741.24 | 467.9585 | 6621.711 | 854.233  | 1547.545 | 177.4441 | 293.438  |
| 62.74799 | 1047     | 932.9847 | 31758.51 | 468.0191 | 6622.611 | 854.3437 | 1548.656 | 177.4797 | 293.4733 |
| 62.82247 | 1047.169 | 932.6927 | 31778.12 | 468.0896 | 6623.643 | 854.4723 | 1549.92  | 177.5124 | 293.5057 |
| 62.87585 | 1047.277 | 933.12   | 31792.16 | 468.1371 | 6624.365 | 854.5594 | 1550.824 | 177.5496 | 293.5426 |
| 62.92923 | 1047.389 | 933.3679 | 31806.18 | 468.1855 | 6625.091 | 854.6478 | 1551.728 | 177.5829 | 293.5756 |
| 62.99411 | 1047.529 | 933.4319 | 31823.2  | 468.2452 | 6625.978 | 854.7569 | 1552.826 | 177.6181 | 293.6105 |
| 63.06761 | 1047.694 | 933.1787 | 31842.46 | 468.3143 | 6626.99  | 854.8829 | 1554.069 | 177.6509 | 293.643  |
| 63.13448 | 1047.845 | 932.8867 | 31859.96 | 468.3773 | 6627.911 | 854.9979 | 1555.199 | 177.6794 | 293.6712 |
| 63.18857 | 1047.951 | 933.4864 | 31874.09 | 468.4244 | 6628.634 | 855.0843 | 1556.112 | 177.7205 | 293.712  |
| 63.23881 | 1048.052 | 933.8961 | 31887.21 | 468.4688 | 6629.309 | 855.1656 | 1556.959 | 177.7555 | 293.7467 |
| 63.29744 | 1048.176 | 934.0392 | 31902.49 | 468.522  | 6630.103 | 855.2629 | 1557.947 | 177.7891 | 293.7799 |
| 63.36856 | 1048.331 | 933.9738 | 31921.02 | 468.5876 | 6631.072 | 855.3827 | 1559.145 | 177.8245 | 293.815  |
| 63.44094 | 1048.497 | 933.5124 | 31939.84 | 468.6561 | 6632.067 | 855.5075 | 1560.363 | 177.8519 | 293.8422 |
| 63.50075 | 1048.621 | 933.7384 | 31955.38 | 468.7099 | 6632.872 | 855.6058 | 1561.368 | 177.8877 | 293.8777 |
| 63.55092 | 1048.717 | 934.3574 | 31968.38 | 468.7529 | 6633.536 | 855.6848 | 1562.21  | 177.927  | 293.9167 |
| 63.60395 | 1048.826 | 934.6018 | 31982.13 | 468.8003 | 6634.247 | 855.7714 | 1563.1   | 177.9597 | 293.949  |
| 63.66941 | 1048.966 | 934.6596 | 31999.07 | 468.8597 | 6635.131 | 855.8801 | 1564.198 | 177.9946 | 293.9837 |
| 63.74389 | 1049.132 | 934.3642 | 32018.32 | 468.929  | 6636.144 | 856.0064 | 1565.446 | 178.0265 | 294.0152 |
| 63.79727 | 1049.237 | 934.7903 | 32032.1  | 468.9756 | 6636.852 | 856.0918 | 1566.34  | 178.0632 | 294.0516 |
| 63.85064 | 1049.347 | 935.0367 | 32045.86 | 469.023  | 6637.565 | 856.1785 | 1567.233 | 178.0959 | 294.084  |
| 63.91553 | 1049.485 | 935.0984 | 32062.57 | 469.0817 | 6638.436 | 856.2857 | 1568.317 | 178.1305 | 294.1183 |
| 63.98903 | 1049.647 | 934.842  | 32081.47 | 469.1495 | 6639.43  | 856.4094 | 1569.545 | 178.1625 | 294.15   |
| 64.0559  | 1049.795 | 934.5471 | 32098.65 | 469.2114 | 6640.334 | 856.5223 | 1570.661 | 178.1902 | 294.1775 |
| 64.10999 | 1049.899 | 935.1458 | 32112.52 | 469.2576 | 6641.043 | 856.607  | 1571.562 | 178.2308 | 294.2178 |

|          |          |          |          |          |          |          |          |          |          |
|----------|----------|----------|----------|----------|----------|----------|----------|----------|----------|
| 64.16023 | 1049.997 | 935.5544 | 32125.39 | 469.3011 | 6641.705 | 856.6868 | 1572.399 | 178.2653 | 294.252  |
| 64.21886 | 1050.119 | 935.6956 | 32140.39 | 469.3534 | 6642.485 | 856.7823 | 1573.375 | 178.2982 | 294.2846 |
| 64.28998 | 1050.272 | 935.6274 | 32158.58 | 469.4178 | 6643.437 | 856.8999 | 1574.558 | 178.3329 | 294.319  |
| 64.36236 | 1050.435 | 935.1627 | 32177.05 | 469.4851 | 6644.413 | 857.0226 | 1575.761 | 178.3595 | 294.3454 |
| 64.42217 | 1050.557 | 935.3868 | 32192.3  | 469.5378 | 6645.204 | 857.119  | 1576.754 | 178.3947 | 294.3803 |
| 64.47234 | 1050.65  | 936.0051 | 32205.07 | 469.58   | 6645.855 | 857.1965 | 1577.586 | 178.4336 | 294.4188 |
| 64.52537 | 1050.758 | 936.248  | 32218.55 | 469.6265 | 6646.553 | 857.2815 | 1578.465 | 178.4657 | 294.4506 |
| 64.59083 | 1050.895 | 936.3035 | 32235.18 | 469.6849 | 6647.421 | 857.3881 | 1579.55  | 178.5    | 294.4846 |
| 64.66531 | 1051.058 | 936.0049 | 32254.08 | 469.7529 | 6648.415 | 857.5122 | 1580.782 | 178.5311 | 294.5154 |
| 64.71869 | 1051.162 | 936.4298 | 32267.6  | 469.7986 | 6649.111 | 857.596  | 1581.665 | 178.5672 | 294.5512 |
| 64.77207 | 1051.269 | 936.6747 | 32281.11 | 469.8451 | 6649.81  | 857.6811 | 1582.547 | 178.5994 | 294.5831 |
| 64.83695 | 1051.404 | 936.7342 | 32297.51 | 469.9027 | 6650.665 | 857.7862 | 1583.618 | 178.6333 | 294.6167 |
| 64.91046 | 1051.564 | 936.4747 | 32316.07 | 469.9693 | 6651.641 | 857.9078 | 1584.831 | 178.6646 | 294.6477 |
| 64.97732 | 1051.71  | 936.1768 | 32332.92 | 470.0301 | 6652.529 | 858.0187 | 1585.933 | 178.6916 | 294.6745 |
| 65.03141 | 1051.811 | 936.7746 | 32346.54 | 470.0754 | 6653.225 | 858.1017 | 1586.823 | 178.7317 | 294.7142 |
| 65.08165 | 1051.908 | 937.1821 | 32359.17 | 470.1181 | 6653.874 | 858.1799 | 1587.65  | 178.7657 | 294.7479 |
| 65.14028 | 1052.027 | 937.3215 | 32373.9  | 470.1694 | 6654.64  | 858.2737 | 1588.614 | 178.798  | 294.78   |
| 65.21141 | 1052.177 | 937.2506 | 32391.74 | 470.2327 | 6655.574 | 858.3892 | 1589.782 | 178.832  | 294.8136 |
| 65.28379 | 1052.337 | 936.7825 | 32409.88 | 470.2988 | 6656.533 | 858.5096 | 1590.97  | 178.8579 | 294.8393 |
| 65.3436  | 1052.457 | 937.0048 | 32424.84 | 470.3505 | 6657.309 | 858.6043 | 1591.951 | 178.8925 | 294.8736 |
| 65.39376 | 1052.549 | 937.6224 | 32437.37 | 470.3919 | 6657.948 | 858.6802 | 1592.773 | 178.9308 | 294.9116 |
| 65.4468  | 1052.654 | 937.8639 | 32450.61 | 470.4375 | 6658.634 | 858.7636 | 1593.641 | 178.9624 | 294.9429 |
| 65.51226 | 1052.788 | 937.9171 | 32466.93 | 470.4948 | 6659.485 | 858.8684 | 1594.712 | 178.996  | 294.9762 |
| 65.58673 | 1052.949 | 937.6153 | 32485.48 | 470.5616 | 6660.461 | 858.9902 | 1595.93  | 179.0264 | 295.0063 |
| 65.64011 | 1053.05  | 938.0391 | 32498.75 | 470.6064 | 6661.144 | 859.0724 | 1596.802 | 179.062  | 295.0416 |
| 65.69349 | 1053.156 | 938.2825 | 32512.01 | 470.6521 | 6661.83  | 859.1559 | 1597.673 | 179.0936 | 295.073  |
| 65.75838 | 1053.288 | 938.3398 | 32528.11 | 470.7086 | 6662.67  | 859.2591 | 1598.731 | 179.1269 | 295.106  |
| 65.83188 | 1053.445 | 938.0773 | 32546.32 | 470.774  | 6663.628 | 859.3785 | 1599.928 | 179.1574 | 295.1362 |
| 65.89874 | 1053.589 | 937.7765 | 32562.87 | 470.8338 | 6664.499 | 859.4874 | 1601.017 | 179.1838 | 295.1623 |
| 65.95284 | 1053.688 | 938.3734 | 32576.23 | 470.8781 | 6665.182 | 859.5688 | 1601.896 | 179.2233 | 295.2015 |
| 66.00308 | 1053.783 | 938.7798 | 32588.63 | 470.92   | 6665.82  | 859.6455 | 1602.713 | 179.2569 | 295.2348 |
| 66.06171 | 1053.9   | 938.9174 | 32603.08 | 470.9704 | 6666.572 | 859.7376 | 1603.665 | 179.2886 | 295.2662 |
| 66.13283 | 1054.047 | 938.8439 | 32620.6  | 471.0325 | 6667.488 | 859.851  | 1604.819 | 179.3218 | 295.2992 |
| 66.20521 | 1054.204 | 938.3724 | 32638.4  | 471.0974 | 6668.43  | 859.9693 | 1605.992 | 179.347  | 295.3241 |



|          |          |          |          |          |          |          |          |          |          |
|----------|----------|----------|----------|----------|----------|----------|----------|----------|----------|
| 66.26502 | 1054.322 | 938.5931 | 32653.08 | 471.1482 | 6669.192 | 860.0622 | 1606.961 | 179.381  | 295.3578 |
| 66.31519 | 1054.412 | 939.2099 | 32665.38 | 471.1888 | 6669.819 | 860.1366 | 1607.773 | 179.4189 | 295.3954 |
| 66.36822 | 1054.515 | 939.4499 | 32678.38 | 471.2335 | 6670.492 | 860.2185 | 1608.63  | 179.45   | 295.4261 |
| 66.43368 | 1054.647 | 939.5009 | 32694.4  | 471.2897 | 6671.327 | 860.3213 | 1609.688 | 179.4829 | 295.4588 |
| 66.50816 | 1054.805 | 939.1961 | 32712.6  | 471.3554 | 6672.286 | 860.4409 | 1610.891 | 179.5125 | 295.4881 |
| 66.56154 | 1054.905 | 939.6187 | 32725.63 | 471.3994 | 6672.956 | 860.5215 | 1611.752 | 179.5476 | 295.5229 |
| 66.61492 | 1055.008 | 939.8606 | 32738.64 | 471.4441 | 6673.63  | 860.6035 | 1612.612 | 179.5788 | 295.5538 |
| 66.6798  | 1055.138 | 939.9157 | 32754.44 | 471.4996 | 6674.454 | 860.7048 | 1613.657 | 179.6114 | 295.5861 |
| 66.75331 | 1055.292 | 939.6503 | 32772.32 | 471.5639 | 6675.394 | 860.8221 | 1614.84  | 179.6412 | 295.6157 |
| 66.82017 | 1055.433 | 939.3467 | 32788.56 | 471.6225 | 6676.25  | 860.929  | 1615.915 | 179.6668 | 295.6411 |
| 66.87426 | 1055.53  | 939.9427 | 32801.67 | 471.6661 | 6676.921 | 861.0089 | 1616.784 | 179.7059 | 295.6798 |
| 66.92451 | 1055.623 | 940.348  | 32813.84 | 471.7071 | 6677.546 | 861.0841 | 1617.59  | 179.7389 | 295.7126 |
| 66.98314 | 1055.739 | 940.4838 | 32828.03 | 471.7566 | 6678.284 | 861.1745 | 1618.53  | 179.7701 | 295.7435 |
| 67.05426 | 1055.883 | 940.4078 | 32845.22 | 471.8175 | 6679.184 | 861.2858 | 1619.67  | 179.8027 | 295.7757 |
| 67.12664 | 1056.038 | 939.933  | 32862.69 | 471.8813 | 6680.109 | 861.402  | 1620.829 | 179.8271 | 295.7999 |
| 67.18645 | 1056.153 | 940.152  | 32877.11 | 471.9312 | 6680.857 | 861.4932 | 1621.786 | 179.8605 | 295.8331 |
| 67.23662 | 1056.241 | 940.7682 | 32889.18 | 471.9709 | 6681.472 | 861.5662 | 1622.587 | 179.8979 | 295.8702 |
| 67.28965 | 1056.342 | 941.0067 | 32901.93 | 472.0148 | 6682.132 | 861.6465 | 1623.434 | 179.9285 | 295.9005 |
| 67.35511 | 1056.472 | 941.0556 | 32917.66 | 472.0701 | 6682.953 | 861.7474 | 1624.479 | 179.9608 | 295.9325 |
| 67.42959 | 1056.627 | 940.7477 | 32935.53 | 472.1345 | 6683.894 | 861.8649 | 1625.667 | 179.9897 | 295.9611 |
| 67.48297 | 1056.725 | 941.1692 | 32948.31 | 472.1777 | 6684.551 | 861.944  | 1626.517 | 180.0243 | 295.9954 |
| 67.53635 | 1056.826 | 941.4096 | 32961.08 | 472.2216 | 6685.213 | 862.0244 | 1627.367 | 180.0549 | 296.0258 |
| 67.60123 | 1056.954 | 941.4627 | 32976.59 | 472.2761 | 6686.022 | 862.1239 | 1628.399 | 180.0869 | 296.0575 |
| 67.67474 | 1057.105 | 941.1942 | 32994.14 | 472.3392 | 6686.945 | 862.239  | 1629.567 | 180.116  | 296.0863 |
| 67.7416  | 1057.244 | 940.8879 | 33010.08 | 472.3968 | 6687.786 | 862.344  | 1630.629 | 180.141  | 296.1111 |
| 67.7957  | 1057.339 | 941.4831 | 33022.95 | 472.4395 | 6688.443 | 862.4224 | 1631.487 | 180.1796 | 296.1493 |
| 67.84594 | 1057.43  | 941.8874 | 33034.89 | 472.4797 | 6689.057 | 862.4962 | 1632.283 | 180.2121 | 296.1816 |
| 67.90457 | 1057.543 | 942.0214 | 33048.82 | 472.5283 | 6689.782 | 862.5848 | 1633.212 | 180.2427 | 296.2119 |
| 67.97569 | 1057.685 | 941.9428 | 33065.69 | 472.5881 | 6690.665 | 862.6942 | 1634.338 | 180.2746 | 296.2435 |
| 68.04807 | 1057.837 | 941.4648 | 33082.84 | 472.6508 | 6691.573 | 862.8083 | 1635.482 | 180.2983 | 296.267  |
| 68.10789 | 1057.95  | 941.6821 | 33096.99 | 472.6997 | 6692.307 | 862.8978 | 1636.427 | 180.3312 | 296.2996 |
| 68.15805 | 1058.037 | 942.2976 | 33108.84 | 472.7387 | 6692.911 | 862.9694 | 1637.219 | 180.3681 | 296.3362 |
| 68.21108 | 1058.136 | 942.5348 | 33121.36 | 472.7818 | 6693.559 | 863.0482 | 1638.055 | 180.3982 | 296.366  |
| 68.27655 | 1058.263 | 942.5815 | 33136.79 | 472.836  | 6694.364 | 863.1472 | 1639.087 | 180.4299 | 296.3974 |

|          |          |          |          |          |          |          |          |          |          |
|----------|----------|----------|----------|----------|----------|----------|----------|----------|----------|
| 68.35102 | 1058.415 | 942.2707 | 33154.33 | 472.8993 | 6695.289 | 863.2626 | 1640.26  | 180.458  | 296.4253 |
| 68.4044  | 1058.511 | 942.691  | 33166.88 | 472.9416 | 6695.934 | 863.3402 | 1641.1   | 180.4921 | 296.4591 |
| 68.45778 | 1058.611 | 942.9301 | 33179.41 | 472.9847 | 6696.583 | 863.4191 | 1641.939 | 180.5223 | 296.489  |
| 68.52267 | 1058.736 | 942.9811 | 33194.63 | 473.0382 | 6697.377 | 863.5168 | 1642.958 | 180.5537 | 296.5201 |
| 68.59617 | 1058.885 | 942.7098 | 33211.86 | 473.1002 | 6698.284 | 863.6298 | 1644.112 | 180.582  | 296.5482 |
| 68.66304 | 1059.021 | 942.4007 | 33227.5  | 473.1568 | 6699.109 | 863.733  | 1645.16  | 180.6064 | 296.5724 |
| 68.71713 | 1059.114 | 942.9951 | 33240.14 | 473.1986 | 6699.754 | 863.8098 | 1646.008 | 180.6445 | 296.6101 |
| 68.76737 | 1059.204 | 943.3983 | 33251.86 | 473.2381 | 6700.357 | 863.8822 | 1646.794 | 180.6766 | 296.6419 |
| 68.826   | 1059.315 | 943.5306 | 33265.53 | 473.2857 | 6701.068 | 863.9692 | 1647.711 | 180.7066 | 296.6717 |
| 68.89713 | 1059.454 | 943.4495 | 33282.09 | 473.3445 | 6701.935 | 864.0765 | 1648.823 | 180.7378 | 296.7026 |
| 68.96951 | 1059.604 | 942.9684 | 33298.92 | 473.4061 | 6702.827 | 864.1887 | 1649.954 | 180.7608 | 296.7254 |
| 69.02932 | 1059.715 | 943.1841 | 33312.81 | 473.4541 | 6703.547 | 864.2765 | 1650.887 | 180.7931 | 296.7574 |
| 69.07948 | 1059.799 | 943.7989 | 33324.44 | 473.4923 | 6704.14  | 864.3466 | 1651.668 | 180.8297 | 296.7936 |
| 69.13252 | 1059.897 | 944.0347 | 33336.73 | 473.5345 | 6704.776 | 864.424  | 1652.495 | 180.8592 | 296.823  |
| 69.19798 | 1060.022 | 944.0794 | 33351.87 | 473.5878 | 6705.566 | 864.5212 | 1653.514 | 180.8903 | 296.8538 |
| 69.27246 | 1060.171 | 943.7656 | 33369.09 | 473.6499 | 6706.474 | 864.6345 | 1654.672 | 180.9177 | 296.8809 |
| 69.32584 | 1060.265 | 944.1848 | 33381.4  | 473.6914 | 6707.107 | 864.7106 | 1655.501 | 180.9514 | 296.9143 |
| 69.37922 | 1060.363 | 944.4225 | 33393.71 | 473.7338 | 6707.744 | 864.7881 | 1656.33  | 180.981  | 296.9437 |
| 69.4441  | 1060.486 | 944.4715 | 33408.65 | 473.7862 | 6708.524 | 864.8839 | 1657.337 | 181.0118 | 296.9742 |
| 69.51761 | 1060.632 | 944.1973 | 33425.55 | 473.8471 | 6709.414 | 864.995  | 1658.476 | 181.0394 | 297.0016 |
| 69.58447 | 1060.766 | 943.8856 | 33440.91 | 473.9027 | 6710.224 | 865.0963 | 1659.512 | 181.0632 | 297.0251 |
| 69.63856 | 1060.857 | 944.4791 | 33453.31 | 473.9437 | 6710.858 | 865.1716 | 1660.348 | 181.1008 | 297.0624 |
| 69.68881 | 1060.945 | 944.8814 | 33464.82 | 473.9825 | 6711.449 | 865.2426 | 1661.125 | 181.1324 | 297.0938 |
| 69.74744 | 1061.054 | 945.012  | 33478.23 | 474.0292 | 6712.147 | 865.328  | 1662.031 | 181.162  | 297.123  |
| 69.81856 | 1061.191 | 944.9285 | 33494.49 | 474.0869 | 6712.999 | 865.4334 | 1663.129 | 181.1925 | 297.1533 |
| 69.89094 | 1061.338 | 944.4442 | 33511.01 | 474.1474 | 6713.874 | 865.5436 | 1664.245 | 181.2148 | 297.1754 |
| 69.95076 | 1061.447 | 944.6583 | 33524.64 | 474.1945 | 6714.581 | 865.6298 | 1665.167 | 181.2466 | 297.2069 |
| 70.00092 | 1061.529 | 945.2725 | 33536.05 | 474.232  | 6715.162 | 865.6985 | 1665.939 | 181.2827 | 297.2426 |
| 70.05396 | 1061.625 | 945.5069 | 33548.11 | 474.2734 | 6715.787 | 865.7744 | 1666.755 | 181.3117 | 297.2715 |
| 70.11942 | 1061.748 | 945.5496 | 33562.98 | 474.3257 | 6716.563 | 865.8699 | 1667.761 | 181.3422 | 297.3017 |
| 70.19389 | 1061.895 | 945.2329 | 33579.88 | 474.3867 | 6717.454 | 865.9812 | 1668.905 | 181.369  | 297.3282 |
| 70.24728 | 1061.987 | 945.6511 | 33591.96 | 474.4275 | 6718.075 | 866.0558 | 1669.724 | 181.4021 | 297.361  |
| 70.30066 | 1062.082 | 945.8875 | 33604.04 | 474.469  | 6718.701 | 866.1318 | 1670.542 | 181.4313 | 297.39   |
| 70.36554 | 1062.203 | 945.9344 | 33618.7  | 474.5205 | 6719.466 | 866.2259 | 1671.536 | 181.4615 | 297.4199 |

|          |          |          |          |          |          |          |          |          |          |
|----------|----------|----------|----------|----------|----------|----------|----------|----------|----------|
| 70.43905 | 1062.347 | 945.6575 | 33635.3  | 474.5803 | 6720.34  | 866.3349 | 1672.661 | 181.4884 | 297.4466 |
| 70.50591 | 1062.479 | 945.3431 | 33650.37 | 474.6349 | 6721.136 | 866.4345 | 1673.684 | 181.5116 | 297.4695 |
| 70.56    | 1062.568 | 945.9358 | 33662.54 | 474.6751 | 6721.757 | 866.5083 | 1674.51  | 181.5487 | 297.5063 |
| 70.61025 | 1062.654 | 946.3371 | 33673.83 | 474.7131 | 6722.337 | 866.578  | 1675.277 | 181.5799 | 297.5373 |
| 70.66888 | 1062.761 | 946.466  | 33687    | 474.759  | 6723.022 | 866.6618 | 1676.172 | 181.6089 | 297.566  |
| 70.74    | 1062.895 | 946.3801 | 33702.96 | 474.8156 | 6723.858 | 866.7653 | 1677.256 | 181.6388 | 297.5956 |
| 70.81238 | 1063.04  | 945.8929 | 33719.17 | 474.8751 | 6724.718 | 866.8735 | 1678.359 | 181.6604 | 297.6171 |
| 70.8722  | 1063.147 | 946.1054 | 33732.55 | 474.9213 | 6725.412 | 866.9581 | 1679.269 | 181.6916 | 297.648  |
| 70.92236 | 1063.228 | 946.7189 | 33743.75 | 474.958  | 6725.983 | 867.0255 | 1680.031 | 181.7273 | 297.6834 |
| 70.9754  | 1063.321 | 946.952  | 33755.59 | 474.9987 | 6726.595 | 867.0999 | 1680.837 | 181.7559 | 297.7117 |
| 71.04086 | 1063.442 | 946.9926 | 33770.18 | 475.05   | 6727.357 | 867.1936 | 1681.83  | 181.7858 | 297.7414 |
| 71.11533 | 1063.586 | 946.6731 | 33786.77 | 475.11   | 6728.232 | 867.303  | 1682.96  | 181.8118 | 297.7672 |
| 71.16872 | 1063.677 | 947.0903 | 33798.63 | 475.1499 | 6728.842 | 867.3762 | 1683.769 | 181.8445 | 297.7996 |
| 71.2221  | 1063.771 | 947.3253 | 33810.49 | 475.1906 | 6729.456 | 867.4507 | 1684.577 | 181.8732 | 297.828  |
| 71.28698 | 1063.889 | 947.3703 | 33824.88 | 475.2412 | 6730.207 | 867.5431 | 1685.559 | 181.9028 | 297.8574 |
| 71.36049 | 1064.03  | 947.0907 | 33841.16 | 475.2999 | 6731.065 | 867.6502 | 1686.67  | 181.9291 | 297.8834 |
| 71.42735 | 1064.16  | 946.7738 | 33855.96 | 475.3536 | 6731.846 | 867.748  | 1687.68  | 181.9517 | 297.9057 |
| 71.48144 | 1064.247 | 947.3657 | 33867.9  | 475.393  | 6732.456 | 867.8203 | 1688.496 | 181.9883 | 297.9421 |
| 71.53169 | 1064.331 | 947.766  | 33878.99 | 475.4303 | 6733.026 | 867.8887 | 1689.253 | 182.0191 | 297.9726 |
| 71.59032 | 1064.436 | 947.8932 | 33891.91 | 475.4753 | 6733.698 | 867.971  | 1690.136 | 182.0476 | 298.0008 |
| 71.66144 | 1064.568 | 947.805  | 33907.57 | 475.5309 | 6734.519 | 868.0725 | 1691.207 | 182.0768 | 298.0298 |
| 71.73382 | 1064.711 | 947.3148 | 33923.49 | 475.5893 | 6735.363 | 868.1789 | 1692.296 | 182.0978 | 298.0506 |
| 71.79364 | 1064.816 | 947.5257 | 33936.62 | 475.6347 | 6736.044 | 868.2619 | 1693.194 | 182.1285 | 298.081  |
| 71.8438  | 1064.895 | 948.1386 | 33947.62 | 475.6707 | 6736.604 | 868.328  | 1693.947 | 182.1637 | 298.1159 |
| 71.89684 | 1064.987 | 948.3705 | 33959.23 | 475.7106 | 6737.205 | 868.401  | 1694.743 | 182.1919 | 298.1438 |
| 71.9623  | 1065.105 | 948.4091 | 33973.56 | 475.7609 | 6737.953 | 868.493  | 1695.724 | 182.2212 | 298.1729 |
| 72.03678 | 1065.247 | 948.0868 | 33989.83 | 475.8198 | 6738.812 | 868.6004 | 1696.84  | 182.2466 | 298.198  |
| 72.09016 | 1065.336 | 948.503  | 34001.48 | 475.859  | 6739.411 | 868.6722 | 1697.638 | 182.2788 | 298.23   |
| 72.14354 | 1065.428 | 948.7367 | 34013.11 | 475.899  | 6740.013 | 868.7453 | 1698.437 | 182.307  | 298.258  |
| 72.20842 | 1065.544 | 948.7797 | 34027.24 | 475.9486 | 6740.751 | 868.836  | 1699.406 | 182.3361 | 298.2868 |
| 72.28193 | 1065.683 | 948.4974 | 34043.23 | 476.0063 | 6741.593 | 868.9412 | 1700.503 | 182.3617 | 298.3122 |
| 72.34879 | 1065.81  | 948.178  | 34057.74 | 476.059  | 6742.36  | 869.0372 | 1701.5   | 182.3836 | 298.3339 |
| 72.40289 | 1065.896 | 948.7691 | 34069.47 | 476.0977 | 6742.959 | 869.1082 | 1702.306 | 182.4198 | 298.3698 |
| 72.45313 | 1065.978 | 949.1685 | 34080.35 | 476.1342 | 6743.518 | 869.1752 | 1703.054 | 182.4502 | 298.3999 |

|          |          |          |          |          |          |          |          |          |          |
|----------|----------|----------|----------|----------|----------|----------|----------|----------|----------|
| 72.51176 | 1066.081 | 949.2942 | 34093.04 | 476.1784 | 6744.178 | 869.256  | 1703.926 | 182.4782 | 298.4276 |
| 72.58289 | 1066.211 | 949.2036 | 34108.41 | 476.233  | 6744.983 | 869.3557 | 1704.984 | 182.5068 | 298.4559 |
| 72.65527 | 1066.351 | 948.7105 | 34124.03 | 476.2904 | 6745.813 | 869.4602 | 1706.059 | 182.5271 | 298.4761 |
| 72.71508 | 1066.454 | 948.9199 | 34136.92 | 476.3349 | 6746.481 | 869.5416 | 1706.946 | 182.5573 | 298.506  |
| 72.76525 | 1066.531 | 949.5322 | 34147.71 | 476.3702 | 6747.03  | 869.6064 | 1707.69  | 182.5921 | 298.5405 |
| 72.81828 | 1066.622 | 949.7627 | 34159.11 | 476.4093 | 6747.621 | 869.6781 | 1708.475 | 182.6198 | 298.568  |
| 72.88374 | 1066.738 | 949.7995 | 34173.17 | 476.4588 | 6748.355 | 869.7684 | 1709.444 | 182.6486 | 298.5965 |
| 72.95822 | 1066.877 | 949.4744 | 34189.15 | 476.5166 | 6749.198 | 869.8738 | 1710.546 | 182.6733 | 298.621  |
| 73.0116  | 1066.964 | 949.8896 | 34200.58 | 476.555  | 6749.785 | 869.9443 | 1711.334 | 182.705  | 298.6525 |
| 73.06498 | 1067.054 | 950.122  | 34212    | 476.5943 | 6750.377 | 870.0161 | 1712.123 | 182.7328 | 298.68   |
| 73.12987 | 1067.169 | 950.1632 | 34225.86 | 476.643  | 6751.101 | 870.1051 | 1713.08  | 182.7613 | 298.7082 |
| 73.20338 | 1067.305 | 949.8782 | 34241.55 | 476.6997 | 6751.928 | 870.2084 | 1714.163 | 182.7863 | 298.733  |
| 73.27024 | 1067.43  | 949.5564 | 34255.8  | 476.7514 | 6752.681 | 870.3027 | 1715.148 | 182.8076 | 298.7542 |
| 73.32433 | 1067.514 | 950.1467 | 34267.31 | 476.7893 | 6753.268 | 870.3723 | 1715.944 | 182.8434 | 298.7896 |
| 73.37458 | 1067.595 | 950.5451 | 34277.99 | 476.8252 | 6753.817 | 870.438  | 1716.682 | 182.8733 | 298.8192 |
| 73.43321 | 1067.696 | 950.6692 | 34290.44 | 476.8685 | 6754.465 | 870.5173 | 1717.544 | 182.9008 | 298.8465 |
| 73.50433 | 1067.823 | 950.5765 | 34305.53 | 476.9222 | 6755.256 | 870.6152 | 1718.588 | 182.9288 | 298.8742 |
| 73.57672 | 1067.961 | 950.0804 | 34320.86 | 476.9785 | 6756.07  | 870.7178 | 1719.649 | 182.9485 | 298.8937 |
| 73.63653 | 1068.062 | 950.2884 | 34333.51 | 477.0222 | 6756.726 | 870.7977 | 1720.525 | 182.9782 | 298.9232 |
| 73.68669 | 1068.138 | 950.9    | 34344.11 | 477.0568 | 6757.265 | 870.8613 | 1721.26  | 183.0126 | 298.9573 |
| 73.73973 | 1068.226 | 951.1293 | 34355.3  | 477.0952 | 6757.844 | 870.9316 | 1722.035 | 183.0398 | 298.9843 |
| 73.80519 | 1068.34  | 951.1642 | 34369.1  | 477.1437 | 6758.565 | 871.0202 | 1722.992 | 183.068  | 299.0122 |
| 73.87967 | 1068.477 | 950.8365 | 34384.78 | 477.2006 | 6759.393 | 871.1238 | 1724.08  | 183.0921 | 299.0361 |
| 73.93305 | 1068.562 | 951.2506 | 34396    | 477.2382 | 6759.969 | 871.1929 | 1724.859 | 183.1234 | 299.0671 |
| 73.98643 | 1068.651 | 951.4818 | 34407.2  | 477.2767 | 6760.55  | 871.2633 | 1725.637 | 183.1507 | 299.0942 |
| 74.05132 | 1068.763 | 951.5211 | 34420.81 | 477.3246 | 6761.26  | 871.3507 | 1726.582 | 183.1787 | 299.1219 |
| 74.12482 | 1068.897 | 951.2336 | 34436.21 | 477.3802 | 6762.073 | 871.4522 | 1727.652 | 183.203  | 299.1461 |
| 74.19169 | 1069.02  | 950.9093 | 34450.2  | 477.431  | 6762.812 | 871.5448 | 1728.624 | 183.2238 | 299.1666 |
| 74.24578 | 1069.102 | 951.4989 | 34461.5  | 477.4682 | 6763.388 | 871.613  | 1729.41  | 183.2591 | 299.2016 |
| 74.29603 | 1069.182 | 951.8964 | 34471.98 | 477.5033 | 6763.927 | 871.6775 | 1730.139 | 183.2886 | 299.2309 |
| 74.35466 | 1069.281 | 952.0189 | 34484.2  | 477.5459 | 6764.563 | 871.7553 | 1730.99  | 183.3156 | 299.2576 |
| 74.42578 | 1069.406 | 951.9239 | 34499.01 | 477.5986 | 6765.339 | 871.8515 | 1732.021 | 183.343  | 299.2848 |
| 74.49816 | 1069.541 | 951.4251 | 34514.06 | 477.654  | 6766.139 | 871.9523 | 1733.069 | 183.3621 | 299.3037 |
| 74.55798 | 1069.64  | 951.6316 | 34526.47 | 477.6968 | 6766.783 | 872.0307 | 1733.934 | 183.3913 | 299.3326 |

|          |          |          |          |          |          |          |          |          |          |
|----------|----------|----------|----------|----------|----------|----------|----------|----------|----------|
| 74.60814 | 1069.715 | 952.2426 | 34536.87 | 477.7307 | 6767.311 | 872.093  | 1734.659 | 183.4253 | 299.3663 |
| 74.66118 | 1069.801 | 952.4707 | 34547.86 | 477.7684 | 6767.88  | 872.162  | 1735.425 | 183.4521 | 299.3929 |
| 74.72664 | 1069.913 | 952.5037 | 34561.4  | 477.8161 | 6768.588 | 872.249  | 1736.37  | 183.4797 | 299.4203 |
| 74.80112 | 1070.048 | 952.1734 | 34576.79 | 477.8719 | 6769.401 | 872.3507 | 1737.444 | 183.5032 | 299.4435 |
| 74.8545  | 1070.132 | 952.5865 | 34587.8  | 477.9088 | 6769.966 | 872.4185 | 1738.213 | 183.5341 | 299.4742 |
| 74.90788 | 1070.218 | 952.8165 | 34598.8  | 477.9466 | 6770.536 | 872.4876 | 1738.981 | 183.561  | 299.5008 |
| 74.97277 | 1070.329 | 952.854  | 34612.16 | 477.9935 | 6771.233 | 872.5734 | 1739.914 | 183.5884 | 299.528  |
| 75.04627 | 1070.46  | 952.5639 | 34627.27 | 478.0482 | 6772.031 | 872.673  | 1740.971 | 183.6121 | 299.5515 |
| 75.11314 | 1070.581 | 952.2373 | 34641    | 478.0981 | 6772.757 | 872.764  | 1741.931 | 183.6323 | 299.5715 |
| 75.16723 | 1070.662 | 952.8261 | 34652.09 | 478.1346 | 6773.322 | 872.8309 | 1742.707 | 183.6672 | 299.6061 |
| 75.21748 | 1070.739 | 953.2227 | 34662.38 | 478.169  | 6773.851 | 872.8941 | 1743.427 | 183.6963 | 299.6349 |
| 75.27611 | 1070.837 | 953.3437 | 34674.37 | 478.2108 | 6774.475 | 872.9705 | 1744.266 | 183.7228 | 299.6612 |
| 75.34723 | 1070.96  | 953.2466 | 34688.91 | 478.2625 | 6775.237 | 873.0649 | 1745.284 | 183.7496 | 299.6878 |
| 75.41961 | 1071.093 | 952.7449 | 34703.68 | 478.3169 | 6776.023 | 873.164  | 1746.319 | 183.768  | 299.7061 |
| 75.47943 | 1071.19  | 952.95   | 34715.87 | 478.359  | 6776.655 | 873.2409 | 1747.174 | 183.7967 | 299.7345 |
| 75.52959 | 1071.263 | 953.5605 | 34726.07 | 478.3922 | 6777.173 | 873.302  | 1747.889 | 183.8303 | 299.7678 |
| 75.58263 | 1071.348 | 953.7873 | 34736.85 | 478.4292 | 6777.732 | 873.3697 | 1748.646 | 183.8567 | 299.794  |
| 75.64809 | 1071.458 | 953.8185 | 34750.15 | 478.476  | 6778.426 | 873.4551 | 1749.579 | 183.8839 | 299.8209 |
| 75.72257 | 1071.59  | 953.4856 | 34765.25 | 478.5308 | 6779.224 | 873.555  | 1750.639 | 183.9067 | 299.8435 |
| 75.77595 | 1071.672 | 953.8978 | 34776.06 | 478.567  | 6779.779 | 873.6215 | 1751.398 | 183.9371 | 299.8737 |
| 75.82933 | 1071.757 | 954.1266 | 34786.86 | 478.6041 | 6780.338 | 873.6893 | 1752.157 | 183.9636 | 299.8999 |
| 75.89422 | 1071.865 | 954.1622 | 34799.97 | 478.6502 | 6781.023 | 873.7735 | 1753.079 | 183.9905 | 299.9265 |
| 75.96773 | 1071.995 | 953.8697 | 34814.81 | 478.7039 | 6781.806 | 873.8714 | 1754.122 | 184.0136 | 299.9495 |
| 76.03459 | 1072.113 | 953.5407 | 34828.28 | 478.7529 | 6782.52  | 873.9608 | 1755.07  | 184.0332 | 299.9689 |
| 76.08868 | 1072.192 | 954.1288 | 34839.16 | 478.7886 | 6783.074 | 874.0263 | 1755.836 | 184.0677 | 300.0031 |
| 76.13893 | 1072.268 | 954.5246 | 34849.26 | 478.8224 | 6783.592 | 874.0883 | 1756.547 | 184.0964 | 300.0315 |
| 76.19756 | 1072.364 | 954.6441 | 34861.03 | 478.8634 | 6784.205 | 874.1633 | 1757.376 | 184.1224 | 300.0573 |
| 76.26869 | 1072.485 | 954.5448 | 34875.3  | 478.9142 | 6784.954 | 874.256  | 1758.381 | 184.1486 | 300.0833 |
| 76.34107 | 1072.615 | 954.0405 | 34889.8  | 478.9677 | 6785.725 | 874.3533 | 1759.403 | 184.1665 | 300.101  |
| 76.40088 | 1072.711 | 954.2441 | 34901.76 | 479.009  | 6786.345 | 874.4288 | 1760.246 | 184.1947 | 300.129  |
| 76.45105 | 1072.782 | 954.854  | 34911.78 | 479.0415 | 6786.854 | 874.4886 | 1760.953 | 184.228  | 300.1619 |
| 76.50408 | 1072.866 | 955.0797 | 34922.36 | 479.0778 | 6787.402 | 874.5551 | 1761.7   | 184.2539 | 300.1877 |
| 76.56955 | 1072.974 | 955.1091 | 34935.41 | 479.1237 | 6788.084 | 874.639  | 1762.621 | 184.2805 | 300.214  |
| 76.64402 | 1073.104 | 954.7736 | 34950.23 | 479.1776 | 6788.868 | 874.7371 | 1763.668 | 184.3027 | 300.236  |

|          |          |          |          |          |          |          |          |          |          |
|----------|----------|----------|----------|----------|----------|----------|----------|----------|----------|
| 76.69741 | 1073.184 | 955.1849 | 34960.84 | 479.2131 | 6789.412 | 874.8023 | 1764.418 | 184.3328 | 300.2658 |
| 76.75079 | 1073.267 | 955.4125 | 34971.44 | 479.2495 | 6789.961 | 874.8688 | 1765.167 | 184.3588 | 300.2916 |
| 76.81567 | 1073.374 | 955.4464 | 34984.31 | 479.2947 | 6790.633 | 874.9515 | 1766.077 | 184.3851 | 300.3177 |
| 76.88918 | 1073.501 | 955.1515 | 34998.87 | 479.3475 | 6791.402 | 875.0476 | 1767.107 | 184.4077 | 300.3401 |
| 76.95604 | 1073.617 | 954.8202 | 35012.1  | 479.3956 | 6792.102 | 875.1354 | 1768.043 | 184.4268 | 300.359  |
| 77.01014 | 1073.695 | 955.4075 | 35022.78 | 479.4306 | 6792.646 | 875.1997 | 1768.799 | 184.4608 | 300.3927 |
| 77.06038 | 1073.769 | 955.8024 | 35032.69 | 479.4638 | 6793.155 | 875.2605 | 1769.501 | 184.4891 | 300.4208 |
| 77.11902 | 1073.863 | 955.9205 | 35044.24 | 479.504  | 6793.756 | 875.334  | 1770.32  | 184.5147 | 300.4461 |
| 77.19014 | 1073.982 | 955.8191 | 35058.25 | 479.5539 | 6794.491 | 875.4251 | 1771.312 | 184.5404 | 300.4716 |
| 77.26252 | 1074.11  | 955.3121 | 35072.48 | 479.6064 | 6795.249 | 875.5207 | 1772.321 | 184.5576 | 300.4887 |
| 77.32234 | 1074.204 | 955.5144 | 35084.22 | 479.6469 | 6795.858 | 875.5948 | 1773.154 | 184.5854 | 300.5162 |
| 77.3725  | 1074.273 | 956.1237 | 35094.05 | 479.6788 | 6796.357 | 875.6534 | 1773.852 | 184.6182 | 300.5487 |
| 77.42554 | 1074.355 | 956.3482 | 35104.44 | 479.7145 | 6796.894 | 875.7186 | 1774.589 | 184.6438 | 300.5741 |
| 77.491   | 1074.461 | 956.3758 | 35117.24 | 479.7595 | 6797.564 | 875.801  | 1775.498 | 184.6698 | 300.5999 |
| 77.56548 | 1074.589 | 956.0379 | 35131.79 | 479.8124 | 6798.333 | 875.8974 | 1776.532 | 184.6914 | 300.6213 |
| 77.61886 | 1074.668 | 956.4483 | 35142.21 | 479.8473 | 6798.868 | 875.9613 | 1777.272 | 184.7211 | 300.6507 |
| 77.67224 | 1074.75  | 956.6747 | 35152.61 | 479.8829 | 6799.406 | 876.0266 | 1778.012 | 184.7467 | 300.6761 |
| 77.73713 | 1074.854 | 956.7069 | 35165.24 | 479.9274 | 6800.066 | 876.1077 | 1778.91  | 184.7725 | 300.7017 |
| 77.81064 | 1074.979 | 956.4095 | 35179.53 | 479.9792 | 6800.821 | 876.2021 | 1779.927 | 184.7945 | 300.7235 |
| 77.8775  | 1075.094 | 956.076  | 35192.51 | 480.0265 | 6801.509 | 876.2884 | 1780.851 | 184.8131 | 300.7419 |
| 77.9316  | 1075.169 | 956.6627 | 35203    | 480.0608 | 6802.043 | 876.3514 | 1781.598 | 184.8467 | 300.7752 |
| 77.98184 | 1075.243 | 957.0567 | 35212.73 | 480.0933 | 6802.542 | 876.411  | 1782.291 | 184.8746 | 300.8029 |
| 78.04047 | 1075.335 | 957.1733 | 35224.07 | 480.1328 | 6803.132 | 876.4832 | 1783.099 | 184.8997 | 300.8278 |
| 78.1116  | 1075.451 | 957.0699 | 35237.81 | 480.1818 | 6803.854 | 876.5726 | 1784.079 | 184.9248 | 300.8526 |
| 78.18398 | 1075.578 | 956.5602 | 35251.78 | 480.2334 | 6804.597 | 876.6666 | 1785.075 | 184.9415 | 300.8692 |
| 78.2438  | 1075.669 | 956.7612 | 35263.3  | 480.2731 | 6805.195 | 876.7393 | 1785.898 | 184.9688 | 300.8962 |
| 78.29396 | 1075.738 | 957.3699 | 35272.95 | 480.3044 | 6805.685 | 876.7967 | 1786.586 | 185.0013 | 300.9284 |
| 78.347   | 1075.818 | 957.5933 | 35283.15 | 480.3393 | 6806.212 | 876.8607 | 1787.314 | 185.0264 | 300.9533 |
| 78.41246 | 1075.922 | 957.6192 | 35295.72 | 480.3836 | 6806.869 | 876.9415 | 1788.212 | 185.052  | 300.9787 |
| 78.48694 | 1076.048 | 957.2789 | 35310    | 480.4355 | 6807.625 | 877.0362 | 1789.233 | 185.073  | 300.9995 |
| 78.54032 | 1076.125 | 957.6883 | 35320.22 | 480.4697 | 6808.15  | 877.0989 | 1789.964 | 185.1023 | 301.0285 |
| 78.5937  | 1076.205 | 957.9136 | 35330.43 | 480.5047 | 6808.678 | 877.163  | 1790.694 | 185.1275 | 301.0535 |
| 78.65859 | 1076.308 | 957.9441 | 35342.83 | 480.5483 | 6809.326 | 877.2426 | 1791.581 | 185.1528 | 301.0786 |
| 78.7321  | 1076.43  | 957.6444 | 35356.85 | 480.5992 | 6810.068 | 877.3354 | 1792.585 | 185.1742 | 301.0998 |

|          |          |          |          |          |          |          |          |          |          |
|----------|----------|----------|----------|----------|----------|----------|----------|----------|----------|
| 78.79896 | 1076.543 | 957.3087 | 35369.6  | 480.6457 | 6810.743 | 877.4201 | 1793.497 | 185.1922 | 301.1177 |
| 78.85306 | 1076.617 | 957.8946 | 35379.89 | 480.6793 | 6811.266 | 877.4818 | 1794.235 | 185.2254 | 301.1506 |
| 78.9033  | 1076.689 | 958.2878 | 35389.43 | 480.7112 | 6811.756 | 877.5403 | 1794.919 | 185.253  | 301.1779 |
| 78.96193 | 1076.779 | 958.4031 | 35400.57 | 480.75   | 6812.336 | 877.6112 | 1795.717 | 185.2777 | 301.2024 |
| 79.03306 | 1076.894 | 958.2976 | 35414.06 | 480.7981 | 6813.044 | 877.6989 | 1796.684 | 185.3022 | 301.2267 |
| 79.10544 | 1077.018 | 957.7854 | 35427.77 | 480.8488 | 6813.774 | 877.7913 | 1797.668 | 185.3183 | 301.2427 |
| 79.16526 | 1077.108 | 957.985  | 35439.08 | 480.8878 | 6814.361 | 877.8626 | 1798.48  | 185.3452 | 301.2693 |
| 79.21542 | 1077.175 | 958.5932 | 35448.55 | 480.9184 | 6814.841 | 877.9189 | 1799.16  | 185.3773 | 301.3011 |
| 79.26846 | 1077.254 | 958.8155 | 35458.55 | 480.9527 | 6815.359 | 877.9817 | 1799.879 | 185.402  | 301.3256 |
| 79.33392 | 1077.356 | 958.8397 | 35470.89 | 480.9961 | 6816.004 | 878.061  | 1800.765 | 185.4271 | 301.3505 |
| 79.4084  | 1077.479 | 958.4969 | 35484.91 | 481.0472 | 6816.746 | 878.1541 | 1801.773 | 185.4475 | 301.3707 |
| 79.46178 | 1077.555 | 958.9055 | 35494.94 | 481.0807 | 6817.261 | 878.2155 | 1802.494 | 185.4764 | 301.3993 |
| 79.51516 | 1077.634 | 959.1297 | 35504.96 | 481.115  | 6817.78  | 878.2784 | 1803.215 | 185.5012 | 301.4239 |
| 79.58005 | 1077.734 | 959.1585 | 35517.13 | 481.1578 | 6818.416 | 878.3566 | 1804.091 | 185.526  | 301.4485 |
| 79.65356 | 1077.855 | 958.8565 | 35530.9  | 481.2078 | 6819.144 | 878.4477 | 1805.082 | 185.5468 | 301.4692 |
| 79.72042 | 1077.966 | 958.5186 | 35543.41 | 481.2535 | 6819.806 | 878.5309 | 1805.983 | 185.5644 | 301.4865 |
| 79.77452 | 1078.038 | 959.1039 | 35553.51 | 481.2865 | 6820.32  | 878.5914 | 1806.711 | 185.5972 | 301.5191 |
| 79.82476 | 1078.108 | 959.4963 | 35562.88 | 481.3177 | 6820.801 | 878.6488 | 1807.386 | 185.6244 | 301.546  |
| 79.88339 | 1078.197 | 959.6101 | 35573.8  | 481.3558 | 6821.37  | 878.7184 | 1808.174 | 185.6486 | 301.57   |
| 79.95452 | 1078.309 | 959.5027 | 35587.04 | 481.403  | 6822.065 | 878.8045 | 1809.129 | 185.6726 | 301.5938 |
| 80.0269  | 1078.432 | 958.9879 | 35600.5  | 481.4528 | 6822.782 | 878.8952 | 1810.1   | 185.6882 | 301.6092 |
| 80.08672 | 1078.52  | 959.1862 | 35611.6  | 481.4911 | 6823.358 | 878.9652 | 1810.902 | 185.7146 | 301.6354 |
| 80.13688 | 1078.585 | 959.7939 | 35620.9  | 481.5211 | 6823.829 | 879.0205 | 1811.573 | 185.7463 | 301.6669 |
| 80.18992 | 1078.663 | 960.0151 | 35630.72 | 481.5548 | 6824.338 | 879.082  | 1812.283 | 185.7707 | 301.691  |
| 80.25538 | 1078.763 | 960.0376 | 35642.83 | 481.5974 | 6824.971 | 879.1599 | 1813.158 | 185.7953 | 301.7154 |
| 80.32986 | 1078.885 | 959.6925 | 35656.59 | 481.6475 | 6825.7   | 879.2513 | 1814.153 | 185.8151 | 301.7351 |
| 80.38324 | 1078.958 | 960.1002 | 35666.43 | 481.6804 | 6826.205 | 879.3116 | 1814.865 | 185.8436 | 301.7633 |
| 80.43663 | 1079.036 | 960.3233 | 35676.27 | 481.7141 | 6826.714 | 879.3732 | 1815.577 | 185.868  | 301.7875 |
| 80.50151 | 1079.135 | 960.3505 | 35688.21 | 481.7561 | 6827.338 | 879.45   | 1816.441 | 185.8924 | 301.8116 |
| 80.57502 | 1079.253 | 960.0462 | 35701.73 | 481.8052 | 6828.053 | 879.5395 | 1817.42  | 185.9126 | 301.8317 |
| 80.64188 | 1079.362 | 959.7062 | 35714    | 481.8501 | 6828.704 | 879.6212 | 1818.309 | 185.9296 | 301.8486 |
| 80.69598 | 1079.433 | 960.2908 | 35723.92 | 481.8824 | 6829.208 | 879.6806 | 1819.028 | 185.9621 | 301.8807 |
| 80.74623 | 1079.502 | 960.6824 | 35733.11 | 481.913  | 6829.679 | 879.7368 | 1819.695 | 185.9889 | 301.9073 |
| 80.80486 | 1079.589 | 960.7949 | 35743.84 | 481.9504 | 6830.238 | 879.8051 | 1820.473 | 186.0127 | 301.9309 |

|          |          |          |          |          |          |          |          |          |          |
|----------|----------|----------|----------|----------|----------|----------|----------|----------|----------|
| 80.87598 | 1079.699 | 960.6855 | 35756.83 | 481.9967 | 6830.921 | 879.8897 | 1821.415 | 186.0362 | 301.9542 |
| 80.94837 | 1079.82  | 960.1683 | 35770.04 | 482.0457 | 6831.625 | 879.9788 | 1822.374 | 186.0512 | 301.9691 |
| 81.00818 | 1079.906 | 960.3653 | 35780.94 | 482.0833 | 6832.19  | 880.0475 | 1823.165 | 186.0772 | 301.9948 |
| 81.05835 | 1079.97  | 960.9724 | 35790.06 | 482.1127 | 6832.652 | 880.1016 | 1823.828 | 186.1085 | 302.0259 |
| 81.11138 | 1080.046 | 961.1926 | 35799.7  | 482.1457 | 6833.151 | 880.1621 | 1824.529 | 186.1325 | 302.0497 |
| 81.17685 | 1080.145 | 961.2135 | 35811.59 | 482.1875 | 6833.773 | 880.2385 | 1825.393 | 186.1566 | 302.0735 |
| 81.25133 | 1080.264 | 960.8661 | 35825.09 | 482.2368 | 6834.488 | 880.3283 | 1826.375 | 186.1759 | 302.0927 |
| 81.30471 | 1080.336 | 961.2729 | 35834.76 | 482.269  | 6834.984 | 880.3874 | 1827.078 | 186.204  | 302.1205 |
| 81.35809 | 1080.412 | 961.4949 | 35844.41 | 482.3021 | 6835.484 | 880.4479 | 1827.781 | 186.2281 | 302.1444 |
| 81.42298 | 1080.509 | 961.5205 | 35856.13 | 482.3433 | 6836.096 | 880.5233 | 1828.634 | 186.2519 | 302.168  |
| 81.49649 | 1080.626 | 961.214  | 35869.4  | 482.3916 | 6836.798 | 880.6111 | 1829.6   | 186.2717 | 302.1876 |
| 81.56335 | 1080.733 | 960.8719 | 35881.45 | 482.4356 | 6837.437 | 880.6914 | 1830.478 | 186.2882 | 302.2039 |
| 81.61745 | 1080.802 | 961.4558 | 35891.18 | 482.4673 | 6837.932 | 880.7496 | 1831.188 | 186.3203 | 302.2357 |
| 81.66769 | 1080.87  | 961.8466 | 35900.2  | 482.4974 | 6838.395 | 880.8048 | 1831.846 | 186.3467 | 302.262  |
| 81.72632 | 1080.955 | 961.9578 | 35910.73 | 482.534  | 6838.943 | 880.8718 | 1832.614 | 186.3701 | 302.2851 |
| 81.79745 | 1081.064 | 961.8465 | 35923.49 | 482.5795 | 6839.613 | 880.9548 | 1833.545 | 186.393  | 302.3079 |
| 81.86983 | 1081.182 | 961.3269 | 35936.45 | 482.6277 | 6840.305 | 881.0424 | 1834.491 | 186.4075 | 302.3222 |
| 81.92965 | 1081.267 | 961.5226 | 35947.14 | 482.6645 | 6840.859 | 881.1098 | 1835.272 | 186.4331 | 302.3475 |
| 81.97981 | 1081.33  | 962.1292 | 35956.1  | 482.6933 | 6841.313 | 881.1629 | 1835.927 | 186.4641 | 302.3783 |
| 82.03285 | 1081.404 | 962.3483 | 35965.56 | 482.7257 | 6841.803 | 881.2222 | 1836.618 | 186.4877 | 302.4017 |
| 82.09831 | 1081.501 | 962.3676 | 35977.23 | 482.7668 | 6842.413 | 881.2972 | 1837.471 | 186.5113 | 302.4251 |
| 82.17279 | 1081.618 | 962.0179 | 35990.48 | 482.8152 | 6843.115 | 881.3854 | 1838.441 | 186.5301 | 302.4437 |
| 82.22618 | 1081.689 | 962.4239 | 35999.97 | 482.8468 | 6843.602 | 881.4433 | 1839.135 | 186.5578 | 302.4712 |
| 82.27956 | 1081.763 | 962.6449 | 36009.45 | 482.8792 | 6844.092 | 881.5027 | 1839.829 | 186.5815 | 302.4946 |
| 82.34444 | 1081.859 | 962.6689 | 36020.95 | 482.9197 | 6844.694 | 881.5767 | 1840.671 | 186.6049 | 302.5178 |
| 82.41795 | 1081.973 | 962.3603 | 36033.97 | 482.9671 | 6845.383 | 881.663  | 1841.625 | 186.6241 | 302.5369 |
| 82.48482 | 1082.079 | 962.0161 | 36045.8  | 483.0104 | 6846.01  | 881.7419 | 1842.492 | 186.6401 | 302.5527 |
| 82.53891 | 1082.146 | 962.5994 | 36055.35 | 483.0414 | 6846.496 | 881.7989 | 1843.192 | 186.6718 | 302.5842 |
| 82.58916 | 1082.212 | 962.9894 | 36064.21 | 483.0709 | 6846.95  | 881.853  | 1843.842 | 186.6979 | 302.6101 |
| 82.64779 | 1082.296 | 963.0993 | 36074.54 | 483.1069 | 6847.488 | 881.9188 | 1844.6   | 186.7209 | 302.6328 |
| 82.71892 | 1082.403 | 962.9861 | 36087.06 | 483.1516 | 6848.146 | 882.0003 | 1845.519 | 186.7433 | 302.6551 |
| 82.7913  | 1082.519 | 962.4641 | 36099.78 | 483.1989 | 6848.825 | 882.0864 | 1846.453 | 186.7573 | 302.6689 |
| 82.85112 | 1082.603 | 962.6586 | 36110.28 | 483.235  | 6849.369 | 882.1526 | 1847.224 | 186.7824 | 302.6938 |
| 82.90128 | 1082.664 | 963.2647 | 36119.07 | 483.2633 | 6849.814 | 882.2045 | 1847.871 | 186.8131 | 302.7242 |



|          |          |          |          |          |          |          |          |          |          |
|----------|----------|----------|----------|----------|----------|----------|----------|----------|----------|
| 82.95432 | 1082.737 | 963.4827 | 36128.36 | 483.2951 | 6850.295 | 882.2627 | 1848.553 | 186.8363 | 302.7472 |
| 83.01978 | 1082.832 | 963.5005 | 36139.81 | 483.3354 | 6850.894 | 882.3364 | 1849.395 | 186.8595 | 302.7702 |
| 83.09426 | 1082.947 | 963.1486 | 36152.82 | 483.3829 | 6851.584 | 882.423  | 1850.353 | 186.8777 | 302.7882 |
| 83.14764 | 1083.017 | 963.5538 | 36162.13 | 483.4139 | 6852.061 | 882.4798 | 1851.038 | 186.905  | 302.8154 |
| 83.20103 | 1083.09  | 963.7737 | 36171.43 | 483.4457 | 6852.542 | 882.5381 | 1851.723 | 186.9283 | 302.8384 |
| 83.26591 | 1083.183 | 963.7961 | 36182.72 | 483.4855 | 6853.133 | 882.6107 | 1852.554 | 186.9513 | 302.8612 |
| 83.33942 | 1083.296 | 963.4854 | 36195.5  | 483.532  | 6853.809 | 882.6955 | 1853.496 | 186.97   | 302.8797 |
| 83.40629 | 1083.399 | 963.1391 | 36207.11 | 483.5746 | 6854.426 | 882.773  | 1854.351 | 186.9855 | 302.8951 |
| 83.46038 | 1083.466 | 963.7218 | 36216.48 | 483.605  | 6854.902 | 882.8289 | 1855.043 | 187.0169 | 302.9262 |
| 83.51063 | 1083.53  | 964.1111 | 36225.18 | 483.6339 | 6855.347 | 882.8819 | 1855.685 | 187.0426 | 302.9517 |
| 83.56926 | 1083.613 | 964.2197 | 36235.32 | 483.6692 | 6855.875 | 882.9465 | 1856.433 | 187.0652 | 302.9741 |
| 83.64039 | 1083.717 | 964.1047 | 36247.61 | 483.7131 | 6856.521 | 883.0265 | 1857.34  | 187.0871 | 302.9958 |
| 83.71277 | 1083.832 | 963.5803 | 36260.1  | 483.7596 | 6857.188 | 883.1111 | 1858.262 | 187.1005 | 303.0091 |
| 83.77259 | 1083.914 | 963.7736 | 36270.4  | 483.795  | 6857.723 | 883.176  | 1859.023 | 187.1253 | 303.0336 |
| 83.82275 | 1083.974 | 964.3792 | 36279.03 | 483.8227 | 6858.159 | 883.227  | 1859.661 | 187.1556 | 303.0637 |
| 83.87579 | 1084.045 | 964.5962 | 36288.14 | 483.8539 | 6858.631 | 883.284  | 1860.335 | 187.1785 | 303.0864 |
| 83.94125 | 1084.138 | 964.6124 | 36299.38 | 483.8935 | 6859.219 | 883.3563 | 1861.166 | 187.2012 | 303.1089 |
| 84.01573 | 1084.252 | 964.2584 | 36312.15 | 483.9402 | 6859.896 | 883.4414 | 1862.111 | 187.2189 | 303.1264 |
| 84.06911 | 1084.32  | 964.6627 | 36321.29 | 483.9706 | 6860.365 | 883.4972 | 1862.788 | 187.2459 | 303.1532 |
| 84.1225  | 1084.391 | 964.8816 | 36330.42 | 484.0018 | 6860.837 | 883.5543 | 1863.464 | 187.2688 | 303.1759 |
| 84.18738 | 1084.483 | 964.9026 | 36341.5  | 484.0408 | 6861.417 | 883.6256 | 1864.285 | 187.2913 | 303.1982 |
| 84.26089 | 1084.594 | 964.5897 | 36354.04 | 484.0865 | 6862.081 | 883.7089 | 1865.214 | 187.3095 | 303.2162 |
| 84.32776 | 1084.696 | 964.2415 | 36365.44 | 484.1283 | 6862.686 | 883.785  | 1866.059 | 187.3245 | 303.2312 |
| 84.38185 | 1084.761 | 964.8236 | 36374.64 | 484.1581 | 6863.153 | 883.8398 | 1866.741 | 187.3555 | 303.2619 |
| 84.4321  | 1084.824 | 965.2121 | 36383.17 | 484.1865 | 6863.59  | 883.8918 | 1867.375 | 187.381  | 303.2871 |
| 84.49073 | 1084.905 | 965.3194 | 36393.13 | 484.2211 | 6864.109 | 883.9552 | 1868.114 | 187.4031 | 303.309  |
| 84.56186 | 1085.008 | 965.2026 | 36405.19 | 484.2642 | 6864.743 | 884.0338 | 1869.009 | 187.4246 | 303.3303 |
| 84.63424 | 1085.12  | 964.6759 | 36417.45 | 484.3099 | 6865.398 | 884.1169 | 1869.919 | 187.4375 | 303.3431 |
| 84.69406 | 1085.201 | 964.868  | 36427.56 | 484.3447 | 6865.923 | 884.1806 | 1870.671 | 187.4618 | 303.3672 |
| 84.74422 | 1085.259 | 965.4732 | 36436.03 | 484.3718 | 6866.351 | 884.2305 | 1871.301 | 187.4918 | 303.397  |
| 84.79726 | 1085.329 | 965.6892 | 36444.97 | 484.4024 | 6866.814 | 884.2865 | 1871.966 | 187.5143 | 303.4193 |
| 84.86272 | 1085.421 | 965.7039 | 36456    | 484.4413 | 6867.391 | 884.3575 | 1872.786 | 187.5366 | 303.4413 |
| 84.9372  | 1085.532 | 965.3477 | 36468.54 | 484.4871 | 6868.056 | 884.4411 | 1873.719 | 187.5538 | 303.4584 |
| 84.99059 | 1085.599 | 965.7512 | 36477.51 | 484.517  | 6868.516 | 884.4958 | 1874.387 | 187.5804 | 303.4848 |

|          |          |          |          |          |          |          |          |          |          |
|----------|----------|----------|----------|----------|----------|----------|----------|----------|----------|
| 85.04397 | 1085.669 | 965.9692 | 36486.47 | 484.5476 | 6868.979 | 884.5518 | 1875.054 | 187.603  | 303.5071 |
| 85.10886 | 1085.76  | 965.9886 | 36497.35 | 484.5859 | 6869.548 | 884.6218 | 1875.865 | 187.6251 | 303.529  |
| 85.18237 | 1085.868 | 965.6737 | 36509.66 | 484.6308 | 6870.201 | 884.7036 | 1876.782 | 187.6427 | 303.5465 |
| 85.24923 | 1085.969 | 965.3235 | 36520.84 | 484.6719 | 6870.795 | 884.7784 | 1877.616 | 187.6573 | 303.561  |
| 85.30333 | 1086.032 | 965.905  | 36529.87 | 484.7011 | 6871.253 | 884.8321 | 1878.29  | 187.688  | 303.5914 |
| 85.35357 | 1086.094 | 966.2928 | 36538.25 | 484.7289 | 6871.682 | 884.8831 | 1878.915 | 187.7131 | 303.6163 |
| 85.4122  | 1086.173 | 966.3989 | 36548.02 | 484.7629 | 6872.191 | 884.9453 | 1879.644 | 187.7348 | 303.6378 |
| 85.48333 | 1086.274 | 966.2803 | 36559.86 | 484.8052 | 6872.814 | 885.0225 | 1880.528 | 187.7558 | 303.6586 |
| 85.55571 | 1086.385 | 965.7513 | 36571.89 | 484.8501 | 6873.457 | 885.1042 | 1881.427 | 187.7682 | 303.6709 |
| 85.61553 | 1086.464 | 965.9423 | 36581.81 | 484.8842 | 6873.972 | 885.1667 | 1882.169 | 187.7921 | 303.6946 |
| 85.6657  | 1086.521 | 966.5469 | 36590.13 | 484.9108 | 6874.392 | 885.2156 | 1882.79  | 187.8218 | 303.7241 |
| 85.71873 | 1086.59  | 966.762  | 36598.91 | 484.9408 | 6874.846 | 885.2705 | 1883.447 | 187.844  | 303.746  |
| 85.7842  | 1086.68  | 966.7752 | 36609.73 | 484.979  | 6875.413 | 885.3402 | 1884.257 | 187.8658 | 303.7677 |
| 85.85868 | 1086.79  | 966.4169 | 36622.04 | 485.024  | 6876.066 | 885.4223 | 1885.178 | 187.8825 | 303.7842 |
| 85.91206 | 1086.855 | 966.8197 | 36630.84 | 485.0532 | 6876.517 | 885.4759 | 1885.837 | 187.9088 | 303.8102 |
| 85.96545 | 1086.924 | 967.0366 | 36639.64 | 485.0833 | 6876.972 | 885.5309 | 1886.495 | 187.931  | 303.8323 |
| 86.03033 | 1087.012 | 967.0546 | 36650.31 | 485.1209 | 6877.53  | 885.5996 | 1887.295 | 187.9527 | 303.8537 |
| 86.10384 | 1087.119 | 966.7376 | 36662.4  | 485.165  | 6878.171 | 885.68   | 1888.201 | 187.9698 | 303.8707 |
| 86.1707  | 1087.218 | 966.3856 | 36673.37 | 485.2054 | 6878.754 | 885.7535 | 1889.024 | 187.984  | 303.8847 |
| 86.2248  | 1087.28  | 966.9665 | 36682.23 | 485.234  | 6879.204 | 885.8061 | 1889.689 | 188.0143 | 303.9148 |
| 86.27505 | 1087.341 | 967.3535 | 36690.46 | 485.2612 | 6879.625 | 885.8561 | 1890.306 | 188.0391 | 303.9393 |
| 86.33368 | 1087.419 | 967.4584 | 36700.05 | 485.2946 | 6880.124 | 885.9171 | 1891.026 | 188.0604 | 303.9605 |
| 86.40481 | 1087.518 | 967.3381 | 36711.67 | 485.3362 | 6880.736 | 885.993  | 1891.899 | 188.0809 | 303.9808 |
| 86.47719 | 1087.627 | 966.8069 | 36723.48 | 485.3803 | 6881.367 | 886.0732 | 1892.786 | 188.0928 | 303.9927 |
| 86.53701 | 1087.704 | 966.9967 | 36733.22 | 485.4138 | 6881.873 | 886.1345 | 1893.518 | 188.1164 | 304.016  |
| 86.58717 | 1087.76  | 967.6009 | 36741.38 | 485.4398 | 6882.285 | 886.1824 | 1894.131 | 188.1458 | 304.0451 |
| 86.64021 | 1087.827 | 967.815  | 36750    | 485.4693 | 6882.731 | 886.2363 | 1894.78  | 188.1676 | 304.0667 |
| 86.70567 | 1087.916 | 967.8267 | 36760.62 | 485.5067 | 6883.287 | 886.3048 | 1895.579 | 188.189  | 304.0879 |
| 86.78015 | 1088.024 | 967.4663 | 36772.7  | 485.551  | 6883.928 | 886.3854 | 1896.488 | 188.2052 | 304.104  |
| 86.83354 | 1088.088 | 967.8684 | 36781.34 | 485.5796 | 6884.37  | 886.438  | 1897.139 | 188.2311 | 304.1297 |
| 86.88692 | 1088.155 | 968.0844 | 36789.97 | 485.6091 | 6884.817 | 886.492  | 1897.789 | 188.253  | 304.1514 |
| 86.95181 | 1088.242 | 968.1009 | 36800.45 | 485.646  | 6885.365 | 886.5594 | 1898.579 | 188.2742 | 304.1724 |
| 87.02532 | 1088.347 | 967.782  | 36812.31 | 485.6894 | 6885.994 | 886.6383 | 1899.473 | 188.2909 | 304.1889 |
| 87.09218 | 1088.444 | 967.4281 | 36823.08 | 485.729  | 6886.567 | 886.7105 | 1900.285 | 188.3046 | 304.2025 |

|          |          |          |          |          |          |          |          |          |          |
|----------|----------|----------|----------|----------|----------|----------|----------|----------|----------|
| 87.14628 | 1088.505 | 968.0083 | 36831.78 | 485.7571 | 6887.008 | 886.7621 | 1900.941 | 188.3345 | 304.2322 |
| 87.19652 | 1088.564 | 968.3947 | 36839.86 | 485.7838 | 6887.421 | 886.8112 | 1901.551 | 188.359  | 304.2565 |
| 87.25516 | 1088.641 | 968.4984 | 36849.27 | 485.8165 | 6887.912 | 886.871  | 1902.261 | 188.38   | 304.2773 |
| 87.32628 | 1088.738 | 968.3763 | 36860.67 | 485.8573 | 6888.512 | 886.9455 | 1903.122 | 188.4    | 304.2971 |
| 87.39867 | 1088.845 | 967.843  | 36872.26 | 485.9007 | 6889.132 | 887.0244 | 1903.998 | 188.4115 | 304.3085 |
| 87.45848 | 1088.921 | 968.0317 | 36881.82 | 485.9336 | 6889.628 | 887.0845 | 1904.721 | 188.4346 | 304.3314 |
| 87.50865 | 1088.976 | 968.6354 | 36889.83 | 485.9591 | 6890.032 | 887.1315 | 1905.326 | 188.4637 | 304.3602 |
| 87.56169 | 1089.042 | 968.8486 | 36898.29 | 485.988  | 6890.47  | 887.1844 | 1905.966 | 188.4852 | 304.3815 |
| 87.62715 | 1089.129 | 968.8588 | 36908.72 | 486.0247 | 6891.016 | 887.2515 | 1906.755 | 188.5062 | 304.4023 |
| 87.70163 | 1089.235 | 968.4965 | 36920.58 | 486.0682 | 6891.646 | 887.3308 | 1907.653 | 188.5218 | 304.4179 |
| 87.75502 | 1089.297 | 968.8977 | 36929.06 | 486.0963 | 6892.08  | 887.3823 | 1908.295 | 188.5475 | 304.4433 |
| 87.8084  | 1089.364 | 969.1128 | 36937.53 | 486.1253 | 6892.518 | 887.4353 | 1908.937 | 188.569  | 304.4646 |
| 87.87329 | 1089.449 | 969.1279 | 36947.82 | 486.1615 | 6893.056 | 887.5015 | 1909.716 | 188.5898 | 304.4852 |
| 87.94679 | 1089.553 | 968.807  | 36959.46 | 486.2041 | 6893.674 | 887.579  | 1910.599 | 188.606  | 304.5013 |
| 88.01366 | 1089.648 | 968.4513 | 36970.03 | 486.243  | 6894.237 | 887.6499 | 1911.4   | 188.6193 | 304.5144 |
| 88.06776 | 1089.707 | 969.031  | 36978.57 | 486.2705 | 6894.669 | 887.7005 | 1912.048 | 188.6489 | 304.5438 |
| 88.118   | 1089.766 | 969.4167 | 36986.49 | 486.2967 | 6895.074 | 887.7486 | 1912.65  | 188.6731 | 304.5677 |
| 88.17664 | 1089.84  | 969.5192 | 36995.73 | 486.3288 | 6895.556 | 887.8073 | 1913.351 | 188.6937 | 304.5882 |
| 88.24776 | 1089.936 | 969.3955 | 37006.92 | 486.3689 | 6896.145 | 887.8805 | 1914.201 | 188.7132 | 304.6076 |
| 88.32015 | 1090.042 | 968.86   | 37018.3  | 486.4115 | 6896.754 | 887.958  | 1915.065 | 188.7242 | 304.6185 |
| 88.37996 | 1090.116 | 969.0476 | 37027.68 | 486.4438 | 6897.241 | 888.017  | 1915.779 | 188.747  | 304.641  |
| 88.43013 | 1090.17  | 969.6508 | 37035.54 | 486.4688 | 6897.637 | 888.063  | 1916.376 | 188.7758 | 304.6695 |
| 88.48317 | 1090.234 | 969.8631 | 37043.85 | 486.4971 | 6898.067 | 888.1149 | 1917.008 | 188.7969 | 304.6905 |
| 88.54863 | 1090.32  | 969.8719 | 37054.08 | 486.5332 | 6898.603 | 888.1808 | 1917.787 | 188.8175 | 304.7109 |
| 88.62311 | 1090.424 | 969.5076 | 37065.72 | 486.5759 | 6899.221 | 888.2587 | 1918.673 | 188.8327 | 304.726  |
| 88.67649 | 1090.485 | 969.9081 | 37074.04 | 486.6035 | 6899.647 | 888.3092 | 1919.307 | 188.858  | 304.751  |
| 88.72988 | 1090.55  | 970.1222 | 37082.36 | 486.6319 | 6900.077 | 888.3612 | 1919.94  | 188.8792 | 304.7721 |
| 88.79477 | 1090.634 | 970.136  | 37092.46 | 486.6674 | 6900.606 | 888.4262 | 1920.709 | 188.8996 | 304.7923 |
| 88.86827 | 1090.736 | 969.8132 | 37103.88 | 486.7093 | 6901.212 | 888.5023 | 1921.58  | 188.9153 | 304.8078 |
| 88.93514 | 1090.829 | 969.4556 | 37114.26 | 486.7475 | 6901.765 | 888.572  | 1922.372 | 188.9281 | 304.8206 |
| 88.98924 | 1090.888 | 970.0348 | 37122.64 | 486.7745 | 6902.189 | 888.6215 | 1923.011 | 188.9574 | 304.8496 |
| 89.03948 | 1090.945 | 970.4198 | 37130.42 | 486.8001 | 6902.587 | 888.6687 | 1923.605 | 188.9813 | 304.8733 |
| 89.09812 | 1091.018 | 970.5212 | 37139.48 | 486.8317 | 6903.059 | 888.7264 | 1924.297 | 189.0016 | 304.8933 |
| 89.16924 | 1091.112 | 970.3958 | 37150.47 | 486.871  | 6903.638 | 888.7982 | 1925.136 | 189.0207 | 304.9123 |

|          |          |          |          |          |          |          |          |          |          |
|----------|----------|----------|----------|----------|----------|----------|----------|----------|----------|
| 89.24163 | 1091.216 | 969.8582 | 37161.64 | 486.9129 | 6904.236 | 888.8743 | 1925.989 | 189.0312 | 304.9227 |
| 89.30144 | 1091.289 | 970.0447 | 37170.85 | 486.9446 | 6904.714 | 888.9323 | 1926.693 | 189.0536 | 304.9449 |
| 89.35161 | 1091.341 | 970.6475 | 37178.56 | 486.9691 | 6905.103 | 888.9773 | 1927.283 | 189.0821 | 304.9731 |
| 89.40465 | 1091.405 | 970.8588 | 37186.71 | 486.9969 | 6905.524 | 889.0282 | 1927.907 | 189.1029 | 304.9938 |
| 89.47011 | 1091.488 | 970.8663 | 37196.76 | 487.0323 | 6906.05  | 889.093  | 1928.676 | 189.123  | 305.0138 |
| 89.54459 | 1091.591 | 970.5    | 37208.18 | 487.0743 | 6906.658 | 889.1694 | 1929.55  | 189.1378 | 305.0284 |
| 89.59798 | 1091.651 | 970.8998 | 37216.35 | 487.1013 | 6907.075 | 889.219  | 1930.175 | 189.1628 | 305.0531 |
| 89.65136 | 1091.715 | 971.113  | 37224.51 | 487.1291 | 6907.498 | 889.27   | 1930.801 | 189.1836 | 305.0738 |
| 89.71625 | 1091.797 | 971.1254 | 37234.42 | 487.1641 | 6908.016 | 889.3338 | 1931.56  | 189.2036 | 305.0936 |
| 89.78976 | 1091.897 | 970.8008 | 37245.64 | 487.2051 | 6908.612 | 889.4086 | 1932.42  | 189.2189 | 305.1087 |
| 89.85662 | 1091.989 | 970.4415 | 37255.82 | 487.2427 | 6909.154 | 889.4771 | 1933.201 | 189.2313 | 305.1211 |
| 89.91072 | 1092.046 | 971.0201 | 37264.05 | 487.2691 | 6909.571 | 889.5256 | 1933.832 | 189.2603 | 305.1498 |
| 89.96097 | 1092.102 | 971.4044 | 37271.68 | 487.2943 | 6909.961 | 889.5718 | 1934.418 | 189.2839 | 305.1731 |
| 90.0196  | 1092.174 | 971.5046 | 37280.58 | 487.3253 | 6910.425 | 889.6284 | 1935.101 | 189.3038 | 305.1929 |
| 90.09072 | 1092.266 | 971.3776 | 37291.36 | 487.3639 | 6910.992 | 889.6989 | 1935.929 | 189.3224 | 305.2114 |
| 90.16311 | 1092.369 | 970.838  | 37302.33 | 487.4051 | 6911.58  | 889.7738 | 1936.771 | 189.3325 | 305.2214 |
| 90.22293 | 1092.44  | 971.0235 | 37311.37 | 487.4361 | 6912.049 | 889.8306 | 1937.466 | 189.3545 | 305.2432 |
| 90.27309 | 1092.491 | 971.6258 | 37318.94 | 487.4601 | 6912.431 | 889.8748 | 1938.049 | 189.3827 | 305.2711 |
| 90.32613 | 1092.554 | 971.8363 | 37326.94 | 487.4874 | 6912.844 | 889.9247 | 1938.664 | 189.4032 | 305.2915 |
| 90.39159 | 1092.636 | 971.8424 | 37336.8  | 487.5222 | 6913.361 | 889.9883 | 1939.423 | 189.423  | 305.311  |
| 90.46607 | 1092.737 | 971.4742 | 37348.01 | 487.5634 | 6913.957 | 890.0634 | 1940.286 | 189.4373 | 305.3252 |
| 90.51946 | 1092.795 | 971.8733 | 37356.03 | 487.5899 | 6914.367 | 890.112  | 1940.903 | 189.4619 | 305.3496 |
| 90.57284 | 1092.858 | 972.0856 | 37364.04 | 487.6172 | 6914.781 | 890.162  | 1941.52  | 189.4825 | 305.37   |
| 90.63773 | 1092.939 | 972.0966 | 37373.76 | 487.6515 | 6915.291 | 890.2246 | 1942.27  | 189.5021 | 305.3894 |
| 90.71124 | 1093.037 | 971.7701 | 37384.77 | 487.6918 | 6915.875 | 890.2981 | 1943.118 | 189.5169 | 305.4041 |
| 90.7781  | 1093.127 | 971.4091 | 37394.77 | 487.7288 | 6916.408 | 890.3654 | 1943.889 | 189.5289 | 305.416  |
| 90.8322  | 1093.183 | 971.9871 | 37402.84 | 487.7546 | 6916.816 | 890.413  | 1944.512 | 189.5576 | 305.4444 |
| 90.88245 | 1093.238 | 972.3708 | 37410.34 | 487.7793 | 6917.199 | 890.4583 | 1945.091 | 189.5808 | 305.4675 |
| 90.94108 | 1093.309 | 972.47   | 37419.07 | 487.8097 | 6917.654 | 890.5139 | 1945.765 | 189.6004 | 305.4869 |
| 91.01221 | 1093.4   | 972.3414 | 37429.65 | 487.8477 | 6918.212 | 890.5831 | 1946.582 | 189.6186 | 305.505  |
| 91.08459 | 1093.5   | 971.7998 | 37440.41 | 487.8881 | 6918.789 | 890.6567 | 1947.413 | 189.6282 | 305.5145 |
| 91.14441 | 1093.57  | 971.9842 | 37449.29 | 487.9186 | 6919.249 | 890.7124 | 1948.099 | 189.6499 | 305.536  |
| 91.19458 | 1093.62  | 972.5861 | 37456.72 | 487.9421 | 6919.624 | 890.7557 | 1948.674 | 189.6778 | 305.5636 |
| 91.24761 | 1093.681 | 972.7956 | 37464.57 | 487.9688 | 6920.03  | 890.8047 | 1949.281 | 189.698  | 305.5836 |

|          |          |          |          |          |          |          |          |          |          |
|----------|----------|----------|----------|----------|----------|----------|----------|----------|----------|
| 91.31308 | 1093.762 | 972.8004 | 37474.25 | 488.003  | 6920.537 | 890.8671 | 1950.03  | 189.7174 | 305.6028 |
| 91.38756 | 1093.861 | 972.4303 | 37485.25 | 488.0435 | 6921.122 | 890.9409 | 1950.882 | 189.7312 | 305.6165 |
| 91.44094 | 1093.919 | 972.8288 | 37493.12 | 488.0695 | 6921.524 | 890.9885 | 1951.491 | 189.7555 | 305.6407 |
| 91.49433 | 1093.98  | 973.0402 | 37500.98 | 488.0963 | 6921.931 | 891.0376 | 1952.101 | 189.7758 | 305.6607 |
| 91.55922 | 1094.059 | 973.0499 | 37510.53 | 488.1299 | 6922.431 | 891.0991 | 1952.84  | 189.795  | 305.6798 |
| 91.63272 | 1094.156 | 972.7216 | 37521.34 | 488.1696 | 6923.005 | 891.1713 | 1953.678 | 189.8094 | 305.694  |
| 91.69959 | 1094.245 | 972.3589 | 37531.15 | 488.2059 | 6923.528 | 891.2374 | 1954.439 | 189.821  | 305.7055 |
| 91.75369 | 1094.299 | 972.9364 | 37539.07 | 488.2312 | 6923.929 | 891.284  | 1955.054 | 189.8493 | 305.7336 |
| 91.80393 | 1094.353 | 973.3194 | 37546.43 | 488.2554 | 6924.304 | 891.3284 | 1955.624 | 189.8723 | 305.7564 |
| 91.86257 | 1094.423 | 973.4175 | 37555    | 488.2852 | 6924.751 | 891.3829 | 1956.29  | 189.8915 | 305.7754 |
| 91.93369 | 1094.512 | 973.2873 | 37565.39 | 488.3225 | 6925.299 | 891.4509 | 1957.097 | 189.9094 | 305.7931 |
| 92.00608 | 1094.611 | 972.7438 | 37575.95 | 488.3623 | 6925.865 | 891.5232 | 1957.917 | 189.9185 | 305.8022 |
| 92.0659  | 1094.68  | 972.9271 | 37584.66 | 488.3922 | 6926.317 | 891.578  | 1958.594 | 189.9399 | 305.8233 |
| 92.11606 | 1094.728 | 973.5286 | 37591.95 | 488.4152 | 6926.684 | 891.6203 | 1959.161 | 189.9675 | 305.8507 |
| 92.1691  | 1094.788 | 973.7373 | 37599.66 | 488.4414 | 6927.083 | 891.6684 | 1959.76  | 189.9874 | 305.8704 |
| 92.23456 | 1094.867 | 973.7408 | 37609.16 | 488.475  | 6927.58  | 891.7296 | 1960.5   | 190.0063 | 305.8892 |
| 92.30904 | 1094.965 | 973.3689 | 37619.96 | 488.5148 | 6928.155 | 891.8022 | 1961.34  | 190.0197 | 305.9025 |
| 92.36243 | 1095.021 | 973.7666 | 37627.68 | 488.5402 | 6928.55  | 891.8489 | 1961.942 | 190.0438 | 305.9263 |
| 92.41581 | 1095.081 | 973.9772 | 37635.4  | 488.5665 | 6928.949 | 891.897  | 1962.543 | 190.0637 | 305.9461 |
| 92.4807  | 1095.159 | 973.9856 | 37644.77 | 488.5996 | 6929.44  | 891.9574 | 1963.273 | 190.0825 | 305.9648 |
| 92.55421 | 1095.254 | 973.6555 | 37655.38 | 488.6385 | 6930.004 | 892.0283 | 1964.099 | 190.0965 | 305.9786 |
| 92.62108 | 1095.342 | 973.2911 | 37665.01 | 488.6742 | 6930.517 | 892.0932 | 1964.85  | 190.1077 | 305.9897 |
| 92.67517 | 1095.395 | 973.8681 | 37672.79 | 488.699  | 6930.91  | 892.1389 | 1965.457 | 190.1357 | 306.0175 |
| 92.72542 | 1095.448 | 974.2506 | 37680    | 488.7227 | 6931.279 | 892.1825 | 1966.021 | 190.1584 | 306.04   |
| 92.78405 | 1095.516 | 974.3475 | 37688.42 | 488.752  | 6931.717 | 892.236  | 1966.677 | 190.1773 | 306.0587 |
| 92.85518 | 1095.603 | 974.2158 | 37698.62 | 488.7886 | 6932.255 | 892.3028 | 1967.474 | 190.1947 | 306.0759 |
| 92.92757 | 1095.701 | 973.6703 | 37708.98 | 488.8277 | 6932.811 | 892.3738 | 1968.283 | 190.2034 | 306.0846 |
| 92.98738 | 1095.768 | 973.8527 | 37717.53 | 488.857  | 6933.255 | 892.4275 | 1968.951 | 190.2244 | 306.1054 |
| 93.03755 | 1095.816 | 974.4538 | 37724.69 | 488.8795 | 6933.615 | 892.469  | 1969.511 | 190.2518 | 306.1325 |
| 93.09059 | 1095.875 | 974.6616 | 37732.25 | 488.9053 | 6934.006 | 892.5162 | 1970.103 | 190.2714 | 306.1519 |
| 93.15605 | 1095.953 | 974.6638 | 37741.58 | 488.9382 | 6934.494 | 892.5763 | 1970.832 | 190.29   | 306.1704 |
| 93.23053 | 1096.048 | 974.2901 | 37752.18 | 488.9773 | 6935.059 | 892.6475 | 1971.662 | 190.3029 | 306.1832 |
| 93.28392 | 1096.104 | 974.6871 | 37759.76 | 489.0023 | 6935.446 | 892.6933 | 1972.255 | 190.3267 | 306.2067 |
| 93.3373  | 1096.163 | 974.8969 | 37767.33 | 489.0281 | 6935.838 | 892.7406 | 1972.849 | 190.3463 | 306.2262 |

|          |          |          |          |          |          |          |          |          |          |
|----------|----------|----------|----------|----------|----------|----------|----------|----------|----------|
| 93.40219 | 1096.239 | 974.9041 | 37776.53 | 489.0605 | 6936.32  | 892.7998 | 1973.569 | 190.3648 | 306.2445 |
| 93.4757  | 1096.332 | 974.5722 | 37786.94 | 489.0988 | 6936.873 | 892.8695 | 1974.385 | 190.3782 | 306.2579 |
| 93.54256 | 1096.419 | 974.2062 | 37796.39 | 489.1338 | 6937.378 | 892.9333 | 1975.126 | 190.3891 | 306.2686 |
| 93.59666 | 1096.471 | 974.7827 | 37804.03 | 489.1581 | 6937.763 | 892.9781 | 1975.725 | 190.4168 | 306.2961 |
| 93.64691 | 1096.522 | 975.1645 | 37811.11 | 489.1814 | 6938.125 | 893.0208 | 1976.281 | 190.4392 | 306.3183 |
| 93.70554 | 1096.589 | 975.2604 | 37819.37 | 489.2101 | 6938.555 | 893.0733 | 1976.929 | 190.4578 | 306.3367 |
| 93.77667 | 1096.675 | 975.1272 | 37829.38 | 489.2461 | 6939.083 | 893.1389 | 1977.715 | 190.4748 | 306.3536 |
| 93.84905 | 1096.771 | 974.5798 | 37839.55 | 489.2845 | 6939.63  | 893.2087 | 1978.514 | 190.4831 | 306.3618 |
| 93.90887 | 1096.837 | 974.7612 | 37847.94 | 489.3133 | 6940.065 | 893.2614 | 1979.174 | 190.5038 | 306.3823 |
| 93.95904 | 1096.884 | 975.3618 | 37854.97 | 489.3353 | 6940.418 | 893.3021 | 1979.726 | 190.5308 | 306.4091 |
| 94.01208 | 1096.941 | 975.5689 | 37862.39 | 489.3606 | 6940.802 | 893.3483 | 1980.31  | 190.5501 | 306.4282 |
| 94.07754 | 1097.018 | 975.5698 | 37871.55 | 489.3929 | 6941.281 | 893.4073 | 1981.03  | 190.5684 | 306.4463 |
| 94.15202 | 1097.112 | 975.1943 | 37881.95 | 489.4314 | 6941.836 | 893.4773 | 1981.848 | 190.5809 | 306.4587 |
| 94.20541 | 1097.166 | 975.5907 | 37889.39 | 489.4558 | 6942.216 | 893.5222 | 1982.434 | 190.6043 | 306.4819 |
| 94.25879 | 1097.224 | 975.7996 | 37896.83 | 489.4811 | 6942.6   | 893.5686 | 1983.02  | 190.6237 | 306.5011 |
| 94.32368 | 1097.299 | 975.8055 | 37905.86 | 489.513  | 6943.073 | 893.6267 | 1983.731 | 190.6418 | 306.5191 |
| 94.39719 | 1097.391 | 975.472  | 37916.07 | 489.5506 | 6943.617 | 893.6952 | 1984.536 | 190.6548 | 306.532  |
| 94.46405 | 1097.475 | 975.1043 | 37925.35 | 489.585  | 6944.112 | 893.7579 | 1985.268 | 190.6653 | 306.5424 |
| 94.51815 | 1097.526 | 975.6803 | 37932.84 | 489.6088 | 6944.49  | 893.8017 | 1985.859 | 190.6927 | 306.5696 |
| 94.5684  | 1097.577 | 976.0615 | 37939.8  | 489.6316 | 6944.845 | 893.8436 | 1986.407 | 190.7149 | 306.5915 |
| 94.62703 | 1097.642 | 976.1564 | 37947.9  | 489.6598 | 6945.267 | 893.8951 | 1987.047 | 190.7331 | 306.6096 |
| 94.69816 | 1097.727 | 976.0218 | 37957.73 | 489.6951 | 6945.785 | 893.9595 | 1987.823 | 190.7497 | 306.626  |
| 94.77054 | 1097.821 | 975.4725 | 37967.71 | 489.7329 | 6946.322 | 894.0282 | 1988.611 | 190.7576 | 306.6339 |
| 94.83036 | 1097.886 | 975.6529 | 37975.95 | 489.7611 | 6946.749 | 894.0799 | 1989.262 | 190.7779 | 306.654  |
| 94.88053 | 1097.932 | 976.2532 | 37982.84 | 489.7827 | 6947.096 | 894.1197 | 1989.807 | 190.8047 | 306.6806 |
| 94.93357 | 1097.988 | 976.4594 | 37990.13 | 489.8075 | 6947.472 | 894.1651 | 1990.383 | 190.8237 | 306.6994 |
| 94.99903 | 1098.063 | 976.4591 | 37999.12 | 489.8392 | 6947.943 | 894.223  | 1991.094 | 190.8416 | 306.7171 |
| 95.07351 | 1098.156 | 976.0818 | 38009.33 | 489.877  | 6948.488 | 894.2918 | 1991.902 | 190.8537 | 306.7291 |
| 95.1269  | 1098.209 | 976.4776 | 38016.63 | 489.901  | 6948.861 | 894.3358 | 1992.48  | 190.8769 | 306.7521 |
| 95.18028 | 1098.266 | 976.6856 | 38023.93 | 489.9258 | 6949.238 | 894.3813 | 1993.058 | 190.8959 | 306.771  |
| 95.24517 | 1098.339 | 976.6904 | 38032.79 | 489.9571 | 6949.702 | 894.4384 | 1993.76  | 190.9137 | 306.7885 |
| 95.31868 | 1098.43  | 976.3552 | 38042.82 | 489.994  | 6950.236 | 894.5056 | 1994.554 | 190.9263 | 306.8011 |
| 95.38554 | 1098.513 | 975.9859 | 38051.93 | 490.0278 | 6950.722 | 894.5672 | 1995.276 | 190.9364 | 306.8111 |
| 95.43964 | 1098.563 | 976.5614 | 38059.28 | 490.0512 | 6951.093 | 894.6102 | 1995.86  | 190.9636 | 306.838  |

|          |          |          |          |          |          |          |          |          |          |
|----------|----------|----------|----------|----------|----------|----------|----------|----------|----------|
| 95.48989 | 1098.612 | 976.942  | 38066.1  | 490.0735 | 6951.441 | 894.6513 | 1996.401 | 190.9854 | 306.8597 |
| 95.54852 | 1098.676 | 977.0359 | 38074.06 | 490.1012 | 6951.856 | 894.7018 | 1997.032 | 191.0033 | 306.8774 |
| 95.61965 | 1098.76  | 976.8998 | 38083.7  | 490.1359 | 6952.365 | 894.7651 | 1997.798 | 191.0195 | 306.8935 |
| 95.69204 | 1098.852 | 976.3487 | 38093.5  | 490.173  | 6952.892 | 894.8325 | 1998.576 | 191.027  | 306.9009 |
| 95.75185 | 1098.916 | 976.5281 | 38101.59 | 490.2007 | 6953.311 | 894.8833 | 1999.218 | 191.047  | 306.9207 |
| 95.80202 | 1098.961 | 977.128  | 38108.36 | 490.2219 | 6953.651 | 894.9223 | 1999.756 | 191.0736 | 306.9471 |
| 95.85506 | 1099.016 | 977.3334 | 38115.51 | 490.2462 | 6954.02  | 894.9668 | 2000.325 | 191.0923 | 306.9656 |
| 95.92052 | 1099.09  | 977.332  | 38124.33 | 490.2773 | 6954.483 | 895.0237 | 2001.026 | 191.1098 | 306.983  |
| 95.995   | 1099.181 | 976.953  | 38134.35 | 490.3144 | 6955.017 | 895.0912 | 2001.823 | 191.1215 | 306.9945 |
| 96.04839 | 1099.233 | 977.3481 | 38141.52 | 490.3379 | 6955.383 | 895.1344 | 2002.394 | 191.1444 | 307.0172 |
| 96.10178 | 1099.288 | 977.5554 | 38148.68 | 490.3623 | 6955.753 | 895.179  | 2002.964 | 191.1631 | 307.0358 |
| 96.16666 | 1099.361 | 977.5589 | 38157.38 | 490.393  | 6956.209 | 895.2351 | 2003.657 | 191.1805 | 307.0531 |
| 96.24017 | 1099.449 | 977.2221 | 38167.22 | 490.4293 | 6956.733 | 895.3011 | 2004.441 | 191.1928 | 307.0652 |
| 96.30704 | 1099.531 | 976.8513 | 38176.16 | 490.4625 | 6957.211 | 895.3617 | 2005.153 | 191.2025 | 307.0748 |
| 96.36114 | 1099.58  | 977.4263 | 38183.38 | 490.4854 | 6957.575 | 895.4037 | 2005.729 | 191.2294 | 307.1015 |
| 96.41138 | 1099.628 | 977.8063 | 38190.08 | 490.5073 | 6957.916 | 895.444  | 2006.263 | 191.251  | 307.1229 |
| 96.47002 | 1099.691 | 977.8992 | 38197.89 | 490.5344 | 6958.323 | 895.4936 | 2006.887 | 191.2686 | 307.1403 |
| 96.54114 | 1099.773 | 977.7617 | 38207.35 | 490.5685 | 6958.822 | 895.5557 | 2007.642 | 191.2844 | 307.156  |
| 96.61353 | 1099.864 | 977.2087 | 38216.97 | 490.605  | 6959.34  | 895.622  | 2008.41  | 191.2915 | 307.163  |
| 96.67335 | 1099.927 | 977.3872 | 38224.9  | 490.6322 | 6959.752 | 895.6718 | 2009.044 | 191.3112 | 307.1826 |
| 96.72351 | 1099.97  | 977.9867 | 38231.55 | 490.6529 | 6960.085 | 895.71   | 2009.575 | 191.3375 | 307.2086 |
| 96.77655 | 1100.025 | 978.1914 | 38238.57 | 490.6767 | 6960.448 | 895.7537 | 2010.136 | 191.3559 | 307.2269 |
| 96.84202 | 1100.097 | 978.1887 | 38247.22 | 490.7073 | 6960.901 | 895.8095 | 2010.828 | 191.3731 | 307.2439 |
| 96.9165  | 1100.187 | 977.808  | 38257.06 | 490.7438 | 6961.426 | 895.8759 | 2011.615 | 191.3843 | 307.2551 |
| 96.96988 | 1100.237 | 978.2025 | 38264.1  | 490.7668 | 6961.785 | 895.9183 | 2012.178 | 191.4069 | 307.2775 |
| 97.02327 | 1100.292 | 978.409  | 38271.13 | 490.7907 | 6962.149 | 895.962  | 2012.74  | 191.4254 | 307.2958 |
| 97.08816 | 1100.363 | 978.4114 | 38279.66 | 490.8208 | 6962.596 | 896.017  | 2013.424 | 191.4425 | 307.3127 |
| 97.16167 | 1100.45  | 978.0729 | 38289.32 | 490.8565 | 6963.111 | 896.0819 | 2014.198 | 191.4543 | 307.3244 |
| 97.22853 | 1100.531 | 977.7006 | 38298.1  | 490.8892 | 6963.58  | 896.1414 | 2014.901 | 191.4637 | 307.3337 |
| 97.28263 | 1100.578 | 978.2751 | 38305.18 | 490.9115 | 6963.937 | 896.1826 | 2015.469 | 191.4903 | 307.3601 |
| 97.33288 | 1100.626 | 978.6546 | 38311.76 | 490.933  | 6964.272 | 896.2221 | 2015.996 | 191.5116 | 307.3812 |
| 97.39151 | 1100.688 | 978.7465 | 38319.42 | 490.9597 | 6964.671 | 896.2708 | 2016.611 | 191.5289 | 307.3984 |
| 97.46264 | 1100.768 | 978.6076 | 38328.71 | 490.9931 | 6965.162 | 896.3318 | 2017.356 | 191.5444 | 307.4137 |
| 97.53502 | 1100.858 | 978.0529 | 38338.15 | 491.029  | 6965.67  | 896.397  | 2018.114 | 191.5511 | 307.4203 |

|          |          |          |          |          |          |          |          |          |          |
|----------|----------|----------|----------|----------|----------|----------|----------|----------|----------|
| 97.59484 | 1100.919 | 978.2305 | 38345.94 | 491.0557 | 6966.074 | 896.4458 | 2018.74  | 191.5704 | 307.4395 |
| 97.64501 | 1100.962 | 978.8296 | 38352.46 | 491.0759 | 6966.401 | 896.4832 | 2019.264 | 191.5965 | 307.4653 |
| 97.69805 | 1101.015 | 979.0335 | 38359.35 | 491.0993 | 6966.757 | 896.5261 | 2019.818 | 191.6146 | 307.4833 |
| 97.76351 | 1101.086 | 979.0297 | 38367.85 | 491.1294 | 6967.202 | 896.5809 | 2020.501 | 191.6314 | 307.5    |
| 97.83799 | 1101.174 | 978.6473 | 38377.5  | 491.1652 | 6967.718 | 896.6461 | 2021.277 | 191.6423 | 307.5108 |
| 97.89138 | 1101.224 | 979.0412 | 38384.41 | 491.1878 | 6968.07  | 896.6876 | 2021.833 | 191.6647 | 307.5329 |
| 97.94476 | 1101.277 | 979.2469 | 38391.31 | 491.2112 | 6968.426 | 896.7305 | 2022.388 | 191.6829 | 307.551  |
| 98.00965 | 1101.347 | 979.2482 | 38399.69 | 491.2408 | 6968.866 | 896.7846 | 2023.063 | 191.6996 | 307.5675 |
| 98.08316 | 1101.433 | 978.9081 | 38409.17 | 491.2758 | 6969.371 | 896.8483 | 2023.826 | 191.711  | 307.5789 |
| 98.15003 | 1101.512 | 978.5343 | 38417.79 | 491.3079 | 6969.832 | 896.9068 | 2024.52  | 191.72   | 307.5878 |
| 98.20413 | 1101.559 | 979.1084 | 38424.74 | 491.3299 | 6970.182 | 896.9472 | 2025.08  | 191.7464 | 307.6139 |
| 98.25437 | 1101.605 | 979.4873 | 38431.19 | 491.3509 | 6970.511 | 896.9859 | 2025.601 | 191.7675 | 307.6348 |
| 98.31301 | 1101.666 | 979.5782 | 38438.71 | 491.3771 | 6970.903 | 897.0337 | 2026.208 | 191.7844 | 307.6516 |
| 98.38413 | 1101.744 | 979.438  | 38447.83 | 491.4099 | 6971.384 | 897.0936 | 2026.943 | 191.7995 | 307.6666 |
| 98.45652 | 1101.833 | 978.8815 | 38457.1  | 491.4452 | 6971.884 | 897.1576 | 2027.691 | 191.8059 | 307.6729 |
| 98.51634 | 1101.893 | 979.0582 | 38464.74 | 491.4714 | 6972.28  | 897.2056 | 2028.308 | 191.8249 | 307.6918 |
| 98.56651 | 1101.934 | 979.657  | 38471.14 | 491.4912 | 6972.6   | 897.2422 | 2028.825 | 191.8507 | 307.7173 |
| 98.61954 | 1101.987 | 979.8601 | 38477.91 | 491.5142 | 6972.95  | 897.2842 | 2029.372 | 191.8686 | 307.735  |
| 98.68501 | 1102.056 | 979.8551 | 38486.25 | 491.5436 | 6973.387 | 897.338  | 2030.046 | 191.8851 | 307.7514 |
| 98.75949 | 1102.143 | 979.4711 | 38495.72 | 491.5788 | 6973.893 | 897.4021 | 2030.812 | 191.8956 | 307.7618 |
| 98.81288 | 1102.192 | 979.8644 | 38502.5  | 491.601  | 6974.239 | 897.4428 | 2031.36  | 191.9176 | 307.7836 |
| 98.86626 | 1102.244 | 980.0694 | 38509.27 | 491.624  | 6974.589 | 897.4849 | 2031.908 | 191.9356 | 307.8014 |
| 98.93115 | 1102.313 | 980.0695 | 38517.5  | 491.653  | 6975.02  | 897.5379 | 2032.574 | 191.9519 | 307.8177 |
| 99.00466 | 1102.397 | 979.7279 | 38526.8  | 491.6874 | 6975.516 | 897.6006 | 2033.327 | 191.963  | 307.8286 |
| 99.07152 | 1102.475 | 979.3526 | 38535.26 | 491.719  | 6975.968 | 897.658  | 2034.012 | 191.9717 | 307.8372 |
| 99.12562 | 1102.521 | 979.9262 | 38542.08 | 491.7405 | 6976.312 | 897.6976 | 2034.565 | 191.9978 | 307.8631 |
| 99.17587 | 1102.566 | 980.3045 | 38548.42 | 491.7611 | 6976.634 | 897.7355 | 2035.079 | 192.0186 | 307.8837 |
| 99.2345  | 1102.626 | 980.3946 | 38555.8  | 491.7868 | 6977.019 | 897.7824 | 2035.678 | 192.0353 | 307.9002 |
| 99.30563 | 1102.703 | 980.253  | 38564.75 | 491.819  | 6977.492 | 897.8412 | 2036.403 | 192.05   | 307.9148 |
| 99.37802 | 1102.79  | 979.6948 | 38573.85 | 491.8537 | 6977.983 | 897.9042 | 2037.141 | 192.0559 | 307.9207 |
| 99.43784 | 1102.849 | 979.8706 | 38581.35 | 491.8794 | 6978.371 | 897.9513 | 2037.75  | 192.0747 | 307.9393 |
| 99.488   | 1102.89  | 980.469  | 38587.63 | 491.8988 | 6978.686 | 897.9871 | 2038.261 | 192.1002 | 307.9646 |
| 99.54104 | 1102.941 | 980.6714 | 38594.27 | 491.9213 | 6979.029 | 898.0284 | 2038.8   | 192.1179 | 307.9821 |
| 99.60651 | 1103.009 | 980.6653 | 38602.45 | 491.9502 | 6979.458 | 898.0812 | 2039.465 | 192.134  | 307.9981 |



|          |          |          |          |          |          |          |          |          |          |
|----------|----------|----------|----------|----------|----------|----------|----------|----------|----------|
| 99.68099 | 1103.094 | 980.2797 | 38611.76 | 491.9849 | 6979.955 | 898.1442 | 2040.221 | 192.1441 | 308.0081 |
| 99.73437 | 1103.142 | 980.6724 | 38618.41 | 492.0065 | 6980.294 | 898.184  | 2040.762 | 192.1659 | 308.0297 |
| 99.78776 | 1103.193 | 980.8767 | 38625.06 | 492.0291 | 6980.637 | 898.2253 | 2041.303 | 192.1836 | 308.0473 |
| 99.85265 | 1103.261 | 980.8757 | 38633.13 | 492.0576 | 6981.06  | 898.2774 | 2041.96  | 192.1996 | 308.0632 |
| 99.92616 | 1103.344 | 980.5325 | 38642.26 | 492.0914 | 6981.548 | 898.339  | 2042.703 | 192.2104 | 308.0738 |
| 99.99302 | 1103.42  | 980.1558 | 38650.56 | 492.1225 | 6981.992 | 898.3954 | 2043.379 | 192.2187 | 308.082  |
| 100.0471 | 1103.465 | 980.729  | 38657.26 | 492.1435 | 6982.329 | 898.4342 | 2043.925 | 192.2445 | 308.1076 |
| 100.0974 | 1103.509 | 981.1068 | 38663.48 | 492.1637 | 6982.645 | 898.4713 | 2044.432 | 192.2651 | 308.128  |
| 100.156  | 1103.568 | 981.1959 | 38670.72 | 492.1889 | 6983.023 | 898.5174 | 2045.022 | 192.2815 | 308.1443 |
| 100.2271 | 1103.644 | 981.0529 | 38679.51 | 492.2206 | 6983.487 | 898.5751 | 2045.739 | 192.2958 | 308.1585 |
| 100.2995 | 1103.73  | 980.4931 | 38688.44 | 492.2546 | 6983.969 | 898.6371 | 2046.467 | 192.3014 | 308.164  |
| 100.3593 | 1103.787 | 980.668  | 38695.8  | 492.2798 | 6984.351 | 898.6832 | 2047.068 | 192.3199 | 308.1823 |
| 100.4095 | 1103.827 | 981.2661 | 38701.97 | 492.2989 | 6984.659 | 898.7183 | 2047.572 | 192.3452 | 308.2074 |
| 100.4625 | 1103.877 | 981.4677 | 38708.48 | 492.321  | 6984.996 | 898.7588 | 2048.104 | 192.3625 | 308.2246 |
| 100.528  | 1103.944 | 981.4605 | 38716.51 | 492.3494 | 6985.417 | 898.8107 | 2048.76  | 192.3784 | 308.2403 |
| 100.6025 | 1104.028 | 981.0734 | 38725.64 | 492.3834 | 6985.905 | 898.8725 | 2049.506 | 192.3881 | 308.25   |
| 100.6559 | 1104.075 | 981.4656 | 38732.17 | 492.4046 | 6986.238 | 898.9116 | 2050.04  | 192.4096 | 308.2713 |
| 100.7093 | 1104.125 | 981.6691 | 38738.7  | 492.4267 | 6986.575 | 898.9521 | 2050.574 | 192.4271 | 308.2886 |
| 100.7741 | 1104.191 | 981.667  | 38746.62 | 492.4547 | 6986.99  | 899.0032 | 2051.222 | 192.4428 | 308.3042 |
| 100.8477 | 1104.273 | 981.3223 | 38755.59 | 492.488  | 6987.469 | 899.0637 | 2051.955 | 192.4531 | 308.3144 |
| 100.9145 | 1104.348 | 980.9442 | 38763.73 | 492.5185 | 6987.905 | 899.1192 | 2052.622 | 192.4611 | 308.3223 |
| 100.9686 | 1104.392 | 981.5169 | 38770.31 | 492.5391 | 6988.235 | 899.1571 | 2053.161 | 192.4867 | 308.3476 |
| 101.0189 | 1104.435 | 981.8942 | 38776.41 | 492.5589 | 6988.546 | 899.1936 | 2053.661 | 192.507  | 308.3678 |
| 101.0775 | 1104.493 | 981.9824 | 38783.52 | 492.5836 | 6988.917 | 899.2388 | 2054.244 | 192.5231 | 308.3838 |
| 101.1486 | 1104.568 | 981.8382 | 38792.14 | 492.6147 | 6989.372 | 899.2955 | 2054.95  | 192.5371 | 308.3977 |
| 101.221  | 1104.652 | 981.2767 | 38800.91 | 492.6482 | 6989.846 | 899.3564 | 2055.669 | 192.5423 | 308.4028 |
| 101.2808 | 1104.709 | 981.4508 | 38808.14 | 492.6729 | 6990.22  | 899.4016 | 2056.262 | 192.5605 | 308.4208 |
| 101.331  | 1104.747 | 982.0485 | 38814.19 | 492.6916 | 6990.522 | 899.436  | 2056.759 | 192.5856 | 308.4457 |
| 101.384  | 1104.796 | 982.2494 | 38820.58 | 492.7132 | 6990.853 | 899.4757 | 2057.284 | 192.6027 | 308.4626 |
| 101.4495 | 1104.862 | 982.2411 | 38828.47 | 492.7411 | 6991.266 | 899.5266 | 2057.932 | 192.6182 | 308.478  |
| 101.524  | 1104.945 | 981.8525 | 38837.43 | 492.7745 | 6991.746 | 899.5874 | 2058.668 | 192.6276 | 308.4873 |
| 101.5774 | 1104.99  | 982.244  | 38843.84 | 492.7954 | 6992.072 | 899.6257 | 2059.195 | 192.6488 | 308.5084 |
| 101.6308 | 1105.04  | 982.4468 | 38850.24 | 492.8171 | 6992.403 | 899.6655 | 2059.721 | 192.666  | 308.5254 |
| 101.6956 | 1105.105 | 982.4437 | 38858.02 | 492.8445 | 6992.81  | 899.7157 | 2060.361 | 192.6814 | 308.5407 |

|          |          |          |          |          |          |          |          |          |          |
|----------|----------|----------|----------|----------|----------|----------|----------|----------|----------|
| 101.7692 | 1105.185 | 982.0975 | 38866.82 | 492.8772 | 6993.28  | 899.7751 | 2061.085 | 192.6914 | 308.5506 |
| 101.836  | 1105.259 | 981.718  | 38874.81 | 492.9072 | 6993.709 | 899.8296 | 2061.743 | 192.699  | 308.5581 |
| 101.8901 | 1105.302 | 982.2903 | 38881.27 | 492.9273 | 6994.033 | 899.8668 | 2062.274 | 192.7243 | 308.5832 |
| 101.9404 | 1105.344 | 982.667  | 38887.26 | 492.9468 | 6994.337 | 899.9025 | 2062.767 | 192.7445 | 308.6032 |
| 101.999  | 1105.401 | 982.7544 | 38894.24 | 492.971  | 6994.701 | 899.9468 | 2063.343 | 192.7603 | 308.6188 |
| 102.0701 | 1105.474 | 982.6089 | 38902.7  | 493.0016 | 6995.149 | 900.0025 | 2064.04  | 192.774  | 308.6324 |
| 102.1425 | 1105.557 | 982.0458 | 38911.3  | 493.0345 | 6995.614 | 900.0624 | 2064.749 | 192.7788 | 308.6372 |
| 102.2023 | 1105.613 | 982.219  | 38918.4  | 493.0588 | 6995.981 | 900.1068 | 2065.334 | 192.7967 | 308.6549 |
| 102.2525 | 1105.65  | 982.8164 | 38924.34 | 493.077  | 6996.278 | 900.1405 | 2065.825 | 192.8215 | 308.6796 |
| 102.3055 | 1105.699 | 983.0166 | 38930.61 | 493.0983 | 6996.602 | 900.1794 | 2066.343 | 192.8384 | 308.6963 |
| 102.371  | 1105.763 | 983.0073 | 38938.35 | 493.1256 | 6997.008 | 900.2294 | 2066.982 | 192.8536 | 308.7113 |
| 102.4455 | 1105.845 | 982.6171 | 38947.15 | 493.1585 | 6997.479 | 900.2892 | 2067.708 | 192.8626 | 308.7203 |
| 102.4989 | 1105.889 | 983.0081 | 38953.44 | 493.1789 | 6997.799 | 900.3267 | 2068.228 | 192.8836 | 308.7411 |
| 102.5523 | 1105.938 | 983.2102 | 38959.72 | 493.2002 | 6998.123 | 900.3657 | 2068.748 | 192.9006 | 308.7579 |
| 102.6172 | 1106.001 | 983.206  | 38967.36 | 493.2272 | 6998.524 | 900.4149 | 2069.379 | 192.9157 | 308.7729 |
| 102.6907 | 1106.08  | 982.8585 | 38976    | 493.2593 | 6998.985 | 900.4733 | 2070.093 | 192.9253 | 308.7824 |
| 102.7575 | 1106.153 | 982.4775 | 38983.84 | 493.2887 | 6999.406 | 900.5269 | 2070.742 | 192.9326 | 308.7896 |
| 102.8116 | 1106.195 | 983.0494 | 38990.18 | 493.3085 | 6999.724 | 900.5633 | 2071.267 | 192.9577 | 308.8145 |
| 102.8619 | 1106.236 | 983.4256 | 38996.05 | 493.3275 | 7000.023 | 900.5983 | 2071.753 | 192.9776 | 308.8342 |
| 102.9205 | 1106.292 | 983.5121 | 39002.91 | 493.3513 | 7000.38  | 900.6419 | 2072.321 | 192.9931 | 308.8496 |
| 102.9916 | 1106.364 | 983.3654 | 39011.21 | 493.3813 | 7000.819 | 900.6966 | 2073.009 | 193.0064 | 308.8628 |
| 103.064  | 1106.446 | 982.8007 | 39019.66 | 493.4137 | 7001.276 | 900.7554 | 2073.709 | 193.0109 | 308.8673 |
| 103.1238 | 1106.5   | 982.9731 | 39026.62 | 493.4375 | 7001.636 | 900.799  | 2074.286 | 193.0285 | 308.8847 |
| 103.174  | 1106.537 | 983.5701 | 39032.45 | 493.4553 | 7001.927 | 900.8319 | 2074.77  | 193.0531 | 308.9091 |
| 103.227  | 1106.584 | 983.7697 | 39038.61 | 493.4762 | 7002.245 | 900.8701 | 2075.281 | 193.0698 | 308.9256 |
| 103.2925 | 1106.648 | 983.7593 | 39046.21 | 493.5031 | 7002.644 | 900.9192 | 2075.912 | 193.0846 | 308.9404 |
| 103.367  | 1106.728 | 983.3677 | 39054.84 | 493.5353 | 7003.106 | 900.9779 | 2076.629 | 193.0933 | 308.9489 |
| 103.4204 | 1106.771 | 983.7581 | 39061.01 | 493.5554 | 7003.42  | 901.0147 | 2077.142 | 193.1141 | 308.9695 |
| 103.4738 | 1106.819 | 983.9595 | 39067.18 | 493.5762 | 7003.739 | 901.053  | 2077.654 | 193.1308 | 308.9861 |
| 103.5387 | 1106.881 | 983.9543 | 39074.68 | 493.6027 | 7004.132 | 901.1013 | 2078.277 | 193.1456 | 309.0007 |
| 103.6122 | 1106.959 | 983.6053 | 39083.15 | 493.6342 | 7004.585 | 901.1587 | 2078.982 | 193.1548 | 309.0099 |
| 103.679  | 1107.031 | 983.2231 | 39090.85 | 493.6632 | 7004.998 | 901.2113 | 2079.622 | 193.1618 | 309.0169 |
| 103.7331 | 1107.071 | 983.7945 | 39097.07 | 493.6825 | 7005.31  | 901.247  | 2080.14  | 193.1867 | 309.0415 |
| 103.7834 | 1107.112 | 984.1703 | 39102.84 | 493.7012 | 7005.603 | 901.2813 | 2080.62  | 193.2063 | 309.061  |

|          |          |          |          |          |          |          |          |          |          |
|----------|----------|----------|----------|----------|----------|----------|----------|----------|----------|
| 103.842  | 1107.166 | 984.2559 | 39109.57 | 493.7245 | 7005.953 | 901.324  | 2081.18  | 193.2216 | 309.0761 |
| 103.9131 | 1107.237 | 984.1079 | 39117.72 | 493.754  | 7006.385 | 901.3778 | 2081.859 | 193.2346 | 309.089  |
| 103.9855 | 1107.318 | 983.5417 | 39126.01 | 493.7859 | 7006.833 | 901.4356 | 2082.55  | 193.2387 | 309.0931 |
| 104.0453 | 1107.371 | 983.7133 | 39132.84 | 493.8092 | 7007.187 | 901.4783 | 2083.119 | 193.2561 | 309.1103 |
| 104.0955 | 1107.407 | 984.31   | 39138.56 | 493.8267 | 7007.472 | 901.5106 | 2083.597 | 193.2805 | 309.1345 |
| 104.1486 | 1107.454 | 984.5089 | 39144.61 | 493.8471 | 7007.785 | 901.5481 | 2084.101 | 193.2968 | 309.1507 |
| 104.214  | 1107.516 | 984.4974 | 39152.07 | 493.8735 | 7008.176 | 901.5963 | 2084.723 | 193.3114 | 309.1651 |
| 104.2885 | 1107.595 | 984.1044 | 39160.54 | 493.9052 | 7008.63  | 901.654  | 2085.43  | 193.3197 | 309.1734 |
| 104.3419 | 1107.637 | 984.4943 | 39166.6  | 493.9249 | 7008.938 | 901.69   | 2085.936 | 193.3403 | 309.1937 |
| 104.3953 | 1107.684 | 984.695  | 39172.66 | 493.9453 | 7009.25  | 901.7275 | 2086.442 | 193.3567 | 309.21   |
| 104.4602 | 1107.745 | 984.6888 | 39180.01 | 493.9713 | 7009.636 | 901.775  | 2087.057 | 193.3712 | 309.2244 |
| 104.5337 | 1107.822 | 984.3384 | 39188.33 | 494.0023 | 7010.081 | 901.8314 | 2087.752 | 193.3802 | 309.2333 |
| 104.6005 | 1107.892 | 983.9548 | 39195.89 | 494.0308 | 7010.487 | 901.8831 | 2088.384 | 193.3869 | 309.2399 |
| 104.6546 | 1107.932 | 984.5259 | 39201.99 | 494.0497 | 7010.793 | 901.9181 | 2088.895 | 193.4114 | 309.2643 |
| 104.7049 | 1107.972 | 984.9011 | 39207.65 | 494.068  | 7011.08  | 901.9517 | 2089.369 | 193.4309 | 309.2835 |
| 104.7635 | 1108.025 | 984.9859 | 39214.26 | 494.0909 | 7011.425 | 901.9936 | 2089.921 | 193.4459 | 309.2984 |
| 104.8346 | 1108.095 | 984.8367 | 39222.26 | 494.1199 | 7011.848 | 902.0464 | 2090.591 | 193.4586 | 309.311  |
| 104.907  | 1108.174 | 984.269  | 39230.39 | 494.1512 | 7012.289 | 902.1032 | 2091.272 | 193.4624 | 309.3147 |
| 104.9669 | 1108.227 | 984.4398 | 39237.1  | 494.1741 | 7012.636 | 902.1452 | 2091.835 | 193.4794 | 309.3317 |
| 105.017  | 1108.261 | 985.0362 | 39242.72 | 494.1912 | 7012.916 | 902.1768 | 2092.306 | 193.5036 | 309.3556 |
| 105.0701 | 1108.307 | 985.2344 | 39248.65 | 494.2112 | 7013.222 | 902.2135 | 2092.803 | 193.5197 | 309.3716 |
| 105.1355 | 1108.368 | 985.222  | 39255.97 | 494.2371 | 7013.606 | 902.2608 | 2093.417 | 193.534  | 309.3858 |
| 105.21   | 1108.446 | 984.8275 | 39264.29 | 494.2683 | 7014.052 | 902.3175 | 2094.115 | 193.542  | 309.3937 |
| 105.2634 | 1108.487 | 985.2169 | 39270.24 | 494.2876 | 7014.354 | 902.3529 | 2094.614 | 193.5623 | 309.4138 |
| 105.3168 | 1108.533 | 985.4169 | 39276.18 | 494.3076 | 7014.661 | 902.3897 | 2095.113 | 193.5785 | 309.4299 |
| 105.3817 | 1108.593 | 985.4097 | 39283.4  | 494.3331 | 7015.039 | 902.4363 | 2095.72  | 193.5927 | 309.4439 |
| 105.4552 | 1108.669 | 985.058  | 39291.57 | 494.3636 | 7015.477 | 902.4917 | 2096.406 | 193.6013 | 309.4525 |
| 105.522  | 1108.738 | 984.6731 | 39298.98 | 494.3916 | 7015.875 | 902.5425 | 2097.029 | 193.6077 | 309.4588 |
| 105.5761 | 1108.777 | 985.2438 | 39304.97 | 494.4101 | 7016.175 | 902.5768 | 2097.533 | 193.6321 | 309.4829 |
| 105.6264 | 1108.816 | 985.6185 | 39310.53 | 494.428  | 7016.457 | 902.6097 | 2098.001 | 193.6513 | 309.502  |
| 105.685  | 1108.868 | 985.7025 | 39317.01 | 494.4505 | 7016.795 | 902.6508 | 2098.546 | 193.666  | 309.5166 |
| 105.7562 | 1108.936 | 985.5521 | 39324.87 | 494.4789 | 7017.21  | 902.7027 | 2099.207 | 193.6784 | 309.5288 |
| 105.8285 | 1109.014 | 984.9829 | 39332.85 | 494.5098 | 7017.643 | 902.7586 | 2099.879 | 193.6819 | 309.5323 |
| 105.8884 | 1109.066 | 985.1529 | 39339.43 | 494.5322 | 7017.984 | 902.7997 | 2100.434 | 193.6987 | 309.549  |

|          |          |          |          |          |          |          |          |          |          |
|----------|----------|----------|----------|----------|----------|----------|----------|----------|----------|
| 105.9385 | 1109.1   | 985.749  | 39344.95 | 494.549  | 7018.259 | 902.8307 | 2100.898 | 193.7226 | 309.5727 |
| 105.9916 | 1109.145 | 985.9465 | 39350.77 | 494.5686 | 7018.559 | 902.8667 | 2101.389 | 193.7385 | 309.5885 |
| 106.057  | 1109.205 | 985.9331 | 39357.95 | 494.5941 | 7018.936 | 902.9131 | 2101.995 | 193.7525 | 309.6023 |
| 106.1315 | 1109.281 | 985.5372 | 39366.12 | 494.6247 | 7019.374 | 902.9689 | 2102.684 | 193.7602 | 309.6099 |
| 106.1849 | 1109.322 | 985.9261 | 39371.96 | 494.6435 | 7019.671 | 903.0035 | 2103.176 | 193.7803 | 309.6298 |
| 106.2383 | 1109.366 | 986.1255 | 39377.79 | 494.6632 | 7019.972 | 903.0396 | 2103.669 | 193.7962 | 309.6456 |
| 106.3032 | 1109.426 | 986.1174 | 39384.87 | 494.6883 | 7020.343 | 903.0854 | 2104.267 | 193.8101 | 309.6594 |
| 106.3767 | 1109.5   | 985.7642 | 39392.89 | 494.7182 | 7020.773 | 903.1398 | 2104.944 | 193.8184 | 309.6676 |
| 106.4436 | 1109.568 | 985.3781 | 39400.17 | 494.7457 | 7021.164 | 903.1898 | 2105.559 | 193.8245 | 309.6737 |
| 106.4976 | 1109.606 | 985.9484 | 39406.05 | 494.7639 | 7021.458 | 903.2233 | 2106.056 | 193.8486 | 309.6976 |
| 106.5479 | 1109.644 | 986.3227 | 39411.51 | 494.7814 | 7021.735 | 903.2556 | 2106.518 | 193.8676 | 309.7164 |
| 106.6065 | 1109.695 | 986.4058 | 39417.87 | 494.8035 | 7022.066 | 903.2959 | 2107.056 | 193.8821 | 309.7308 |
| 106.6777 | 1109.762 | 986.2543 | 39425.58 | 494.8314 | 7022.474 | 903.3468 | 2107.708 | 193.8941 | 309.7427 |
| 106.75   | 1109.839 | 985.6836 | 39433.41 | 494.8617 | 7022.9   | 903.4018 | 2108.371 | 193.8973 | 309.7458 |
| 106.8099 | 1109.89  | 985.8529 | 39439.88 | 494.8837 | 7023.234 | 903.4422 | 2108.918 | 193.9139 | 309.7622 |
| 106.86   | 1109.923 | 986.4486 | 39445.29 | 494.9001 | 7023.503 | 903.4725 | 2109.377 | 193.9376 | 309.7858 |
| 106.9131 | 1109.967 | 986.6455 | 39451    | 494.9194 | 7023.798 | 903.5078 | 2109.861 | 193.9533 | 309.8013 |
| 106.9785 | 1110.026 | 986.6311 | 39458.05 | 494.9444 | 7024.168 | 903.5534 | 2110.459 | 193.967  | 309.8149 |
| 107.053  | 1110.101 | 986.2339 | 39466.07 | 494.9745 | 7024.598 | 903.6082 | 2111.138 | 193.9743 | 309.8221 |
| 107.1064 | 1110.141 | 986.6223 | 39471.8  | 494.993  | 7024.889 | 903.6421 | 2111.624 | 193.9942 | 309.8418 |
| 107.1598 | 1110.185 | 986.821  | 39477.52 | 495.0123 | 7025.184 | 903.6775 | 2112.11  | 194.0099 | 309.8574 |
| 107.2247 | 1110.243 | 986.8119 | 39484.48 | 495.0369 | 7025.549 | 903.7225 | 2112.7   | 194.0235 | 309.8709 |
| 107.2982 | 1110.315 | 986.4575 | 39492.35 | 495.0663 | 7025.971 | 903.776  | 2113.368 | 194.0315 | 309.8788 |
| 107.3651 | 1110.383 | 986.0701 | 39499.49 | 495.0933 | 7026.355 | 903.8251 | 2113.975 | 194.0373 | 309.8846 |
| 107.4192 | 1110.42  | 986.64   | 39505.26 | 495.1111 | 7026.644 | 903.8579 | 2114.465 | 194.0612 | 309.9082 |
| 107.4694 | 1110.457 | 987.0138 | 39510.62 | 495.1283 | 7026.915 | 903.8895 | 2114.921 | 194.08   | 309.9269 |
| 107.528  | 1110.507 | 987.0962 | 39516.86 | 495.1499 | 7027.241 | 903.9291 | 2115.451 | 194.0942 | 309.941  |
| 107.5992 | 1110.573 | 986.9435 | 39524.43 | 495.1774 | 7027.641 | 903.9791 | 2116.095 | 194.1059 | 309.9526 |
| 107.6716 | 1110.649 | 986.3713 | 39532.12 | 495.2072 | 7028.059 | 904.0332 | 2116.749 | 194.1088 | 309.9554 |
| 107.7314 | 1110.699 | 986.5399 | 39538.46 | 495.2288 | 7028.387 | 904.0728 | 2117.289 | 194.1251 | 309.9716 |
| 107.7815 | 1110.731 | 987.1353 | 39543.77 | 495.2448 | 7028.651 | 904.1024 | 2117.741 | 194.1486 | 309.9949 |
| 107.8346 | 1110.774 | 987.3316 | 39549.38 | 495.2637 | 7028.94  | 904.1371 | 2118.219 | 194.1641 | 310.0102 |
| 107.9    | 1110.832 | 987.3163 | 39556.3  | 495.2882 | 7029.304 | 904.1819 | 2118.809 | 194.1775 | 310.0236 |
| 107.9745 | 1110.905 | 986.9177 | 39564.17 | 495.3178 | 7029.726 | 904.2357 | 2119.479 | 194.1845 | 310.0305 |

|          |          |          |          |          |          |          |          |          |          |
|----------|----------|----------|----------|----------|----------|----------|----------|----------|----------|
| 108.0279 | 1110.945 | 987.3056 | 39569.79 | 495.3359 | 7030.012 | 904.269  | 2119.959 | 194.2041 | 310.0499 |
| 108.0813 | 1110.988 | 987.5037 | 39575.41 | 495.3549 | 7030.301 | 904.3037 | 2120.438 | 194.2196 | 310.0653 |
| 108.1462 | 1111.045 | 987.4937 | 39582.24 | 495.379  | 7030.66  | 904.3478 | 2121.02  | 194.233  | 310.0786 |
| 108.2197 | 1111.116 | 987.1379 | 39589.96 | 495.4079 | 7031.073 | 904.4004 | 2121.679 | 194.2406 | 310.0861 |
| 108.2866 | 1111.183 | 986.7493 | 39596.98 | 495.4345 | 7031.451 | 904.4486 | 2122.278 | 194.2461 | 310.0916 |
| 108.3407 | 1111.218 | 987.3188 | 39602.64 | 495.4519 | 7031.734 | 904.4807 | 2122.762 | 194.2698 | 310.115  |
| 108.3909 | 1111.255 | 987.6922 | 39607.9  | 495.4687 | 7032     | 904.5118 | 2123.211 | 194.2884 | 310.1335 |
| 108.4496 | 1111.304 | 987.7738 | 39614.02 | 495.49   | 7032.32  | 904.5507 | 2123.735 | 194.3024 | 310.1473 |
| 108.5207 | 1111.369 | 987.62   | 39621.45 | 495.5169 | 7032.713 | 904.5997 | 2124.37  | 194.3138 | 310.1586 |
| 108.5931 | 1111.444 | 987.0464 | 39629    | 495.5462 | 7033.123 | 904.6529 | 2125.015 | 194.3163 | 310.1612 |
| 108.6529 | 1111.492 | 987.2143 | 39635.23 | 495.5675 | 7033.446 | 904.6918 | 2125.548 | 194.3324 | 310.1771 |
| 108.7031 | 1111.524 | 987.8094 | 39640.44 | 495.5831 | 7033.704 | 904.7208 | 2125.994 | 194.3557 | 310.2002 |
| 108.7561 | 1111.566 | 988.0051 | 39645.95 | 495.6017 | 7033.988 | 904.7548 | 2126.466 | 194.371  | 310.2153 |
| 108.8216 | 1111.623 | 987.9888 | 39652.74 | 495.6258 | 7034.345 | 904.7987 | 2127.047 | 194.3841 | 310.2283 |
| 108.896  | 1111.695 | 987.5889 | 39660.46 | 495.6549 | 7034.76  | 904.8516 | 2127.709 | 194.3908 | 310.2349 |
| 108.9494 | 1111.734 | 987.9763 | 39665.98 | 495.6726 | 7035.04  | 904.8842 | 2128.182 | 194.4102 | 310.2542 |
| 109.0028 | 1111.776 | 988.1738 | 39671.5  | 495.6912 | 7035.324 | 904.9183 | 2128.655 | 194.4255 | 310.2693 |
| 109.0677 | 1111.832 | 988.1628 | 39678.19 | 495.7149 | 7035.676 | 904.9616 | 2129.229 | 194.4386 | 310.2823 |
| 109.1412 | 1111.902 | 987.8058 | 39685.77 | 495.7433 | 7036.082 | 905.0132 | 2129.879 | 194.4459 | 310.2896 |
| 109.2081 | 1111.967 | 987.416  | 39692.66 | 495.7694 | 7036.453 | 905.0607 | 2130.47  | 194.4511 | 310.2947 |
| 109.2622 | 1112.002 | 987.9852 | 39698.22 | 495.7864 | 7036.73  | 905.0921 | 2130.948 | 194.4746 | 310.318  |
| 109.3124 | 1112.038 | 988.3581 | 39703.38 | 495.8029 | 7036.992 | 905.1225 | 2131.391 | 194.493  | 310.3362 |
| 109.3711 | 1112.087 | 988.4389 | 39709.39 | 495.8238 | 7037.305 | 905.1607 | 2131.907 | 194.5067 | 310.3498 |
| 109.4422 | 1112.151 | 988.2841 | 39716.68 | 495.8502 | 7037.691 | 905.2089 | 2132.534 | 194.5178 | 310.3609 |
| 109.5146 | 1112.224 | 987.709  | 39724.09 | 495.8791 | 7038.094 | 905.2612 | 2133.171 | 194.5201 | 310.3631 |
| 109.5744 | 1112.272 | 987.8762 | 39730.2  | 495.8999 | 7038.411 | 905.2993 | 2133.696 | 194.5359 | 310.3787 |
| 109.6246 | 1112.302 | 988.471  | 39735.32 | 495.9152 | 7038.664 | 905.3277 | 2134.136 | 194.559  | 310.4017 |
| 109.6776 | 1112.344 | 988.6661 | 39740.72 | 495.9334 | 7038.943 | 905.361  | 2134.602 | 194.574  | 310.4166 |
| 109.7431 | 1112.399 | 988.6489 | 39747.39 | 495.957  | 7039.293 | 905.4042 | 2135.175 | 194.5869 | 310.4293 |
| 109.8176 | 1112.471 | 988.2477 | 39754.97 | 495.9856 | 7039.7   | 905.4562 | 2135.828 | 194.5933 | 310.4356 |
| 109.8709 | 1112.508 | 988.6346 | 39760.39 | 496.003  | 7039.975 | 905.4881 | 2136.295 | 194.6125 | 310.4547 |
| 109.9243 | 1112.549 | 988.8315 | 39765.8  | 496.0212 | 7040.254 | 905.5215 | 2136.761 | 194.6275 | 310.4696 |
| 109.9892 | 1112.605 | 988.8196 | 39772.38 | 496.0445 | 7040.599 | 905.564  | 2137.328 | 194.6404 | 310.4823 |
| 110.0627 | 1112.674 | 988.4614 | 39779.82 | 496.0724 | 7040.998 | 905.6148 | 2137.97  | 194.6474 | 310.4893 |

|          |          |          |          |          |          |          |          |          |          |
|----------|----------|----------|----------|----------|----------|----------|----------|----------|----------|
| 110.1296 | 1112.738 | 988.0704 | 39786.58 | 496.0981 | 7041.363 | 905.6614 | 2138.552 | 194.6523 | 310.4942 |
| 110.1837 | 1112.772 | 988.6392 | 39792.03 | 496.1148 | 7041.635 | 905.6922 | 2139.023 | 194.6756 | 310.5172 |
| 110.2339 | 1112.807 | 989.0117 | 39797.09 | 496.1309 | 7041.891 | 905.722  | 2139.46  | 194.6938 | 310.5353 |
| 110.2926 | 1112.855 | 989.0917 | 39803    | 496.1514 | 7042.199 | 905.7595 | 2139.97  | 194.7073 | 310.5486 |
| 110.3637 | 1112.917 | 988.9358 | 39810.15 | 496.1774 | 7042.578 | 905.8068 | 2140.588 | 194.7181 | 310.5594 |
| 110.4361 | 1112.99  | 988.3594 | 39817.43 | 496.2057 | 7042.974 | 905.8582 | 2141.216 | 194.72   | 310.5613 |
| 110.4959 | 1113.036 | 988.5259 | 39823.42 | 496.2262 | 7043.284 | 905.8956 | 2141.735 | 194.7356 | 310.5767 |
| 110.5461 | 1113.066 | 989.1204 | 39828.44 | 496.2412 | 7043.533 | 905.9234 | 2142.169 | 194.7585 | 310.5995 |
| 110.5991 | 1113.107 | 989.3149 | 39833.75 | 496.259  | 7043.806 | 905.9561 | 2142.628 | 194.7733 | 310.6141 |
| 110.6646 | 1113.162 | 989.2968 | 39840.29 | 496.2822 | 7044.15  | 905.9985 | 2143.194 | 194.786  | 310.6266 |
| 110.7391 | 1113.232 | 988.8943 | 39847.73 | 496.3103 | 7044.55  | 906.0496 | 2143.838 | 194.792  | 310.6326 |
| 110.7925 | 1113.268 | 989.2808 | 39853.05 | 496.3273 | 7044.819 | 906.0809 | 2144.299 | 194.811  | 310.6515 |
| 110.8458 | 1113.309 | 989.4771 | 39858.36 | 496.3452 | 7045.093 | 906.1136 | 2144.759 | 194.8259 | 310.6662 |
| 110.9107 | 1113.363 | 989.4643 | 39864.82 | 496.3681 | 7045.432 | 906.1554 | 2145.318 | 194.8384 | 310.6787 |
| 110.9842 | 1113.431 | 989.1049 | 39872.12 | 496.3955 | 7045.824 | 906.2053 | 2145.951 | 194.8452 | 310.6853 |
| 111.0511 | 1113.494 | 988.7127 | 39878.76 | 496.4207 | 7046.182 | 906.2511 | 2146.526 | 194.8498 | 310.6899 |
| 111.1052 | 1113.528 | 989.2811 | 39884.11 | 496.437  | 7046.449 | 906.2813 | 2146.991 | 194.8729 | 310.7128 |
| 111.1555 | 1113.562 | 989.6532 | 39889.08 | 496.4529 | 7046.7   | 906.3104 | 2147.422 | 194.8909 | 310.7306 |
| 111.2141 | 1113.608 | 989.7325 | 39894.87 | 496.473  | 7047.002 | 906.3472 | 2147.925 | 194.9041 | 310.7437 |
| 111.2852 | 1113.67  | 989.5756 | 39901.9  | 496.4985 | 7047.374 | 906.3937 | 2148.534 | 194.9147 | 310.7542 |
| 111.3576 | 1113.741 | 988.9978 | 39909.04 | 496.5264 | 7047.763 | 906.4442 | 2149.154 | 194.9163 | 310.7558 |
| 111.4174 | 1113.787 | 989.1636 | 39914.92 | 496.5464 | 7048.068 | 906.4809 | 2149.666 | 194.9316 | 310.771  |
| 111.4676 | 1113.816 | 989.7578 | 39919.85 | 496.5611 | 7048.312 | 906.5081 | 2150.094 | 194.9544 | 310.7936 |
| 111.5206 | 1113.856 | 989.9517 | 39925.06 | 496.5786 | 7048.58  | 906.5402 | 2150.547 | 194.969  | 310.808  |
| 111.5861 | 1113.91  | 989.9328 | 39931.48 | 496.6014 | 7048.917 | 906.5818 | 2151.105 | 194.9814 | 310.8203 |
| 111.6606 | 1113.979 | 989.529  | 39938.78 | 496.629  | 7049.31  | 906.632  | 2151.74  | 194.9871 | 310.826  |
| 111.714  | 1114.015 | 989.915  | 39944    | 496.6457 | 7049.575 | 906.6627 | 2152.195 | 195.0059 | 310.8446 |
| 111.7674 | 1114.054 | 990.1108 | 39949.22 | 496.6632 | 7049.843 | 906.6948 | 2152.649 | 195.0205 | 310.8591 |
| 111.8322 | 1114.107 | 990.0971 | 39955.55 | 496.6856 | 7050.176 | 906.7358 | 2153.201 | 195.0329 | 310.8713 |
| 111.9058 | 1114.174 | 989.7365 | 39962.72 | 496.7126 | 7050.561 | 906.7848 | 2153.825 | 195.0393 | 310.8777 |
| 111.9726 | 1114.237 | 989.3432 | 39969.23 | 496.7374 | 7050.913 | 906.8299 | 2154.392 | 195.0437 | 310.8821 |
| 112.0267 | 1114.269 | 989.9113 | 39974.49 | 496.7534 | 7051.174 | 906.8594 | 2154.851 | 195.0665 | 310.9047 |
| 112.077  | 1114.302 | 990.2829 | 39979.36 | 496.7689 | 7051.421 | 906.888  | 2155.276 | 195.0843 | 310.9223 |
| 112.1356 | 1114.348 | 990.3615 | 39985.05 | 496.7886 | 7051.717 | 906.9241 | 2155.772 | 195.0973 | 310.9353 |

|          |          |          |          |          |          |          |          |          |          |
|----------|----------|----------|----------|----------|----------|----------|----------|----------|----------|
| 112.2067 | 1114.409 | 990.2035 | 39991.94 | 496.8137 | 7052.083 | 906.9698 | 2156.373 | 195.1076 | 310.9454 |
| 112.2791 | 1114.479 | 989.6244 | 39998.95 | 496.8411 | 7052.465 | 907.0195 | 2156.985 | 195.109  | 310.9468 |
| 112.3389 | 1114.524 | 989.7895 | 40004.73 | 496.8608 | 7052.764 | 907.0555 | 2157.49  | 195.1241 | 310.9617 |
| 112.3891 | 1114.552 | 990.3835 | 40009.57 | 496.8751 | 7053.003 | 907.0821 | 2157.912 | 195.1466 | 310.9841 |
| 112.4421 | 1114.591 | 990.5768 | 40014.68 | 496.8923 | 7053.266 | 907.1135 | 2158.359 | 195.161  | 310.9984 |
| 112.5076 | 1114.644 | 990.557  | 40020.98 | 496.9147 | 7053.597 | 907.1544 | 2158.91  | 195.1731 | 311.0104 |
| 112.5821 | 1114.712 | 990.152  | 40028.15 | 496.9418 | 7053.983 | 907.2037 | 2159.536 | 195.1786 | 311.0158 |
| 112.6355 | 1114.747 | 990.5376 | 40033.27 | 496.9581 | 7054.242 | 907.2338 | 2159.985 | 195.1972 | 311.0342 |
| 112.6889 | 1114.786 | 990.7327 | 40038.39 | 496.9753 | 7054.506 | 907.2653 | 2160.433 | 195.2116 | 311.0485 |
| 112.7538 | 1114.838 | 990.7183 | 40044.61 | 496.9974 | 7054.832 | 907.3055 | 2160.977 | 195.2237 | 311.0605 |
| 112.8273 | 1114.904 | 990.3564 | 40051.64 | 497.0239 | 7055.211 | 907.3537 | 2161.593 | 195.2298 | 311.0665 |
| 112.8941 | 1114.965 | 989.962  | 40058.04 | 497.0483 | 7055.556 | 907.398  | 2162.152 | 195.2339 | 311.0706 |
| 112.9482 | 1114.997 | 990.5297 | 40063.19 | 497.0639 | 7055.812 | 907.4269 | 2162.605 | 195.2566 | 311.0931 |
| 112.9985 | 1115.03  | 990.9009 | 40067.98 | 497.0791 | 7056.054 | 907.4549 | 2163.024 | 195.2742 | 311.1105 |
| 113.0571 | 1115.075 | 990.9789 | 40073.56 | 497.0984 | 7056.345 | 907.4903 | 2163.514 | 195.287  | 311.1232 |
| 113.1282 | 1115.134 | 990.8198 | 40080.33 | 497.1231 | 7056.704 | 907.5352 | 2164.107 | 195.297  | 311.1332 |
| 113.2006 | 1115.203 | 990.2395 | 40087.21 | 497.15   | 7057.079 | 907.5841 | 2164.71  | 195.2981 | 311.1342 |
| 113.2605 | 1115.247 | 990.4039 | 40092.88 | 497.1693 | 7057.373 | 907.6194 | 2165.208 | 195.3129 | 311.1489 |
| 113.3106 | 1115.275 | 990.9976 | 40097.63 | 497.1834 | 7057.607 | 907.6454 | 2165.625 | 195.3353 | 311.1711 |
| 113.3637 | 1115.313 | 991.1904 | 40102.64 | 497.2002 | 7057.865 | 907.6763 | 2166.066 | 195.3495 | 311.1852 |
| 113.4291 | 1115.365 | 991.1697 | 40108.83 | 497.2221 | 7058.191 | 907.7163 | 2166.609 | 195.3614 | 311.1969 |
| 113.5036 | 1115.432 | 990.7635 | 40115.86 | 497.2488 | 7058.57  | 907.7649 | 2167.227 | 195.3665 | 311.2021 |
| 113.557  | 1115.466 | 991.1486 | 40120.89 | 497.2648 | 7058.824 | 907.7943 | 2167.67  | 195.3849 | 311.2203 |
| 113.6104 | 1115.504 | 991.3432 | 40125.92 | 497.2817 | 7059.083 | 907.8252 | 2168.112 | 195.3992 | 311.2344 |
| 113.6753 | 1115.556 | 991.3279 | 40132.02 | 497.3033 | 7059.403 | 907.8647 | 2168.648 | 195.411  | 311.2461 |
| 113.7488 | 1115.62  | 990.9649 | 40138.93 | 497.3294 | 7059.775 | 907.9121 | 2169.256 | 195.4168 | 311.2519 |
| 113.8157 | 1115.681 | 990.5694 | 40145.2  | 497.3534 | 7060.114 | 907.9556 | 2169.808 | 195.4207 | 311.2558 |
| 113.8698 | 1115.712 | 991.1368 | 40150.26 | 497.3686 | 7060.365 | 907.9839 | 2170.254 | 195.4431 | 311.278  |
| 113.92   | 1115.743 | 991.5076 | 40154.96 | 497.3835 | 7060.602 | 908.0113 | 2170.668 | 195.4606 | 311.2953 |
| 113.9786 | 1115.788 | 991.5848 | 40160.44 | 497.4025 | 7060.888 | 908.0461 | 2171.151 | 195.4732 | 311.3078 |
| 114.0498 | 1115.846 | 991.4248 | 40167.08 | 497.4267 | 7061.24  | 908.0902 | 2171.736 | 195.4829 | 311.3174 |
| 114.1222 | 1115.914 | 990.8432 | 40173.83 | 497.4532 | 7061.609 | 908.1382 | 2172.331 | 195.4837 | 311.3182 |
| 114.182  | 1115.957 | 991.0069 | 40179.4  | 497.4722 | 7061.897 | 908.1729 | 2172.822 | 195.4983 | 311.3327 |
| 114.2321 | 1115.984 | 991.6004 | 40184.06 | 497.4859 | 7062.127 | 908.1983 | 2173.234 | 195.5205 | 311.3547 |

|          |          |          |          |          |          |          |          |          |          |
|----------|----------|----------|----------|----------|----------|----------|----------|----------|----------|
| 114.2852 | 1116.022 | 991.7926 | 40188.98 | 497.5024 | 7062.38  | 908.2286 | 2173.669 | 195.5345 | 311.3686 |
| 114.3506 | 1116.073 | 991.7711 | 40195.06 | 497.524  | 7062.699 | 908.268  | 2174.205 | 195.5461 | 311.3801 |
| 114.4251 | 1116.138 | 991.3637 | 40201.96 | 497.5502 | 7063.072 | 908.3157 | 2174.814 | 195.551  | 311.3849 |
| 114.4785 | 1116.172 | 991.7484 | 40206.89 | 497.5659 | 7063.321 | 908.3445 | 2175.251 | 195.5692 | 311.4029 |
| 114.5319 | 1116.209 | 991.9424 | 40211.83 | 497.5824 | 7063.575 | 908.3748 | 2175.687 | 195.5832 | 311.4169 |
| 114.5968 | 1116.26  | 991.9263 | 40217.82 | 497.6037 | 7063.89  | 908.4136 | 2176.216 | 195.5948 | 311.4283 |
| 114.6703 | 1116.323 | 991.5622 | 40224.59 | 497.6293 | 7064.254 | 908.4602 | 2176.816 | 195.6004 | 311.4339 |
| 114.7372 | 1116.383 | 991.1656 | 40230.75 | 497.6528 | 7064.587 | 908.503  | 2177.36  | 195.604  | 311.4374 |
| 114.7913 | 1116.413 | 991.7327 | 40235.72 | 497.6678 | 7064.834 | 908.5306 | 2177.8   | 195.6262 | 311.4595 |
| 114.8415 | 1116.444 | 992.1031 | 40240.33 | 497.6824 | 7065.067 | 908.5575 | 2178.209 | 195.6435 | 311.4766 |
| 114.9002 | 1116.487 | 992.1796 | 40245.71 | 497.701  | 7065.347 | 908.5916 | 2178.685 | 195.6559 | 311.4889 |
| 114.9713 | 1116.545 | 992.0186 | 40252.23 | 497.7248 | 7065.693 | 908.6349 | 2179.262 | 195.6653 | 311.4982 |
| 115.0437 | 1116.612 | 991.4357 | 40258.86 | 497.7509 | 7066.055 | 908.6822 | 2179.849 | 195.6658 | 311.4987 |
| 115.1035 | 1116.654 | 991.5988 | 40264.32 | 497.7694 | 7066.338 | 908.7162 | 2180.334 | 195.6803 | 311.513  |
| 115.1537 | 1116.681 | 992.192  | 40268.89 | 497.7829 | 7066.563 | 908.7411 | 2180.74  | 195.7023 | 311.5349 |
| 115.2067 | 1116.717 | 992.3837 | 40273.73 | 497.7991 | 7066.812 | 908.7708 | 2181.169 | 195.7161 | 311.5485 |
| 115.2722 | 1116.767 | 992.3613 | 40279.69 | 497.8202 | 7067.125 | 908.8094 | 2181.698 | 195.7275 | 311.5598 |
| 115.3466 | 1116.832 | 991.9528 | 40286.46 | 497.846  | 7067.491 | 908.8563 | 2182.299 | 195.7321 | 311.5644 |
| 115.4    | 1116.865 | 992.3371 | 40291.31 | 497.8614 | 7067.735 | 908.8846 | 2182.729 | 195.7501 | 311.5822 |
| 115.4534 | 1116.901 | 992.5306 | 40296.15 | 497.8776 | 7067.985 | 908.9143 | 2183.159 | 195.7639 | 311.596  |
| 115.5183 | 1116.951 | 992.5137 | 40302.03 | 497.8984 | 7068.293 | 908.9523 | 2183.682 | 195.7753 | 311.6072 |
| 115.5918 | 1117.014 | 992.1484 | 40308.68 | 497.9236 | 7068.652 | 908.9981 | 2184.273 | 195.7806 | 311.6124 |
| 115.6587 | 1117.072 | 991.7508 | 40314.72 | 497.9468 | 7068.979 | 909.0402 | 2184.81  | 195.7839 | 311.6158 |
| 115.7128 | 1117.101 | 992.3175 | 40319.6  | 497.9614 | 7069.22  | 909.0673 | 2185.244 | 195.806  | 311.6376 |
| 115.763  | 1117.132 | 992.6875 | 40324.13 | 497.9757 | 7069.449 | 909.0936 | 2185.647 | 195.8231 | 311.6546 |
| 115.8217 | 1117.174 | 992.7634 | 40329.41 | 497.994  | 7069.724 | 909.1271 | 2186.117 | 195.8352 | 311.6666 |
| 115.8928 | 1117.231 | 992.6014 | 40335.8  | 498.0173 | 7070.064 | 909.1696 | 2186.687 | 195.8444 | 311.6757 |
| 115.9652 | 1117.297 | 992.0174 | 40342.31 | 498.043  | 7070.419 | 909.2161 | 2187.266 | 195.8446 | 311.676  |
| 116.025  | 1117.338 | 992.1798 | 40347.67 | 498.0612 | 7070.697 | 909.2494 | 2187.744 | 195.8589 | 311.69   |
| 116.0752 | 1117.364 | 992.7727 | 40352.16 | 498.0743 | 7070.917 | 909.2738 | 2188.144 | 195.8807 | 311.7117 |
| 116.1282 | 1117.4   | 992.9639 | 40356.9  | 498.0902 | 7071.162 | 909.3029 | 2188.567 | 195.8943 | 311.7252 |
| 116.1937 | 1117.449 | 992.9407 | 40362.75 | 498.111  | 7071.469 | 909.3408 | 2189.089 | 195.9055 | 311.7362 |
| 116.2682 | 1117.513 | 992.5311 | 40369.41 | 498.1364 | 7071.828 | 909.3869 | 2189.682 | 195.9098 | 311.7405 |
| 116.3216 | 1117.545 | 992.9149 | 40374.16 | 498.1514 | 7072.068 | 909.4146 | 2190.107 | 195.9276 | 311.7582 |



|          |          |          |          |          |          |          |          |          |          |
|----------|----------|----------|----------|----------|----------|----------|----------|----------|----------|
| 116.3749 | 1117.581 | 993.1079 | 40378.91 | 498.1673 | 7072.313 | 909.4438 | 2190.531 | 195.9413 | 311.7717 |
| 116.4398 | 1117.629 | 993.0902 | 40384.68 | 498.1878 | 7072.616 | 909.4812 | 2191.046 | 195.9524 | 311.7827 |
| 116.5133 | 1117.691 | 992.7238 | 40391.21 | 498.2125 | 7072.968 | 909.5261 | 2191.63  | 195.9574 | 311.7877 |
| 116.5802 | 1117.748 | 992.3252 | 40397.15 | 498.2353 | 7073.289 | 909.5675 | 2192.16  | 195.9605 | 311.7908 |
| 116.6343 | 1117.777 | 992.8916 | 40401.93 | 498.2496 | 7073.526 | 909.594  | 2192.588 | 195.9824 | 311.8125 |
| 116.6846 | 1117.807 | 993.2612 | 40406.37 | 498.2636 | 7073.75  | 909.6198 | 2192.985 | 195.9993 | 311.8292 |
| 116.7432 | 1117.848 | 993.3364 | 40411.56 | 498.2816 | 7074.02  | 909.6526 | 2193.449 | 196.0112 | 311.8411 |
| 116.8143 | 1117.904 | 993.1735 | 40417.83 | 498.3045 | 7074.354 | 909.6944 | 2194.01  | 196.0202 | 311.85   |
| 116.8867 | 1117.969 | 992.5882 | 40424.22 | 498.3297 | 7074.703 | 909.7401 | 2194.582 | 196.0202 | 311.8499 |
| 116.9465 | 1118.01  | 992.7501 | 40429.48 | 498.3476 | 7074.975 | 909.7728 | 2195.053 | 196.0342 | 311.8638 |
| 116.9967 | 1118.035 | 993.3428 | 40433.89 | 498.3604 | 7075.192 | 909.7967 | 2195.448 | 196.0558 | 311.8853 |
| 117.0497 | 1118.07  | 993.5334 | 40438.54 | 498.376  | 7075.431 | 909.8252 | 2195.865 | 196.0693 | 311.8986 |
| 117.1152 | 1118.118 | 993.5094 | 40444.29 | 498.3964 | 7075.733 | 909.8625 | 2196.38  | 196.0802 | 311.9094 |
| 117.1897 | 1118.181 | 993.0987 | 40450.82 | 498.4213 | 7076.086 | 909.9078 | 2196.965 | 196.0842 | 311.9134 |
| 117.2431 | 1118.212 | 993.4821 | 40455.48 | 498.4361 | 7076.321 | 909.9349 | 2197.384 | 196.1019 | 311.9309 |
| 117.2965 | 1118.247 | 993.6746 | 40460.15 | 498.4517 | 7076.561 | 909.9635 | 2197.803 | 196.1153 | 311.9443 |
| 117.3614 | 1118.295 | 993.6561 | 40465.81 | 498.4718 | 7076.859 | 910.0002 | 2198.311 | 196.1262 | 311.955  |
| 117.4349 | 1118.356 | 993.2886 | 40472.22 | 498.4961 | 7077.205 | 910.0444 | 2198.886 | 196.131  | 311.9598 |
| 117.5017 | 1118.412 | 992.889  | 40478.04 | 498.5185 | 7077.52  | 910.0851 | 2199.409 | 196.1339 | 311.9626 |
| 117.5558 | 1118.44  | 993.4551 | 40482.74 | 498.5325 | 7077.753 | 910.111  | 2199.831 | 196.1556 | 311.9841 |
| 117.6061 | 1118.469 | 993.8243 | 40487.1  | 498.5462 | 7077.972 | 910.1363 | 2200.224 | 196.1723 | 312.0007 |
| 117.6647 | 1118.51  | 993.8989 | 40492.19 | 498.5638 | 7078.237 | 910.1685 | 2200.681 | 196.184  | 312.0123 |
| 117.7358 | 1118.565 | 993.7351 | 40498.35 | 498.5864 | 7078.565 | 910.2095 | 2201.235 | 196.1927 | 312.021  |
| 117.8082 | 1118.629 | 993.1486 | 40504.62 | 498.6112 | 7078.908 | 910.2545 | 2201.798 | 196.1924 | 312.0207 |
| 117.8681 | 1118.669 | 993.3098 | 40509.78 | 498.6287 | 7079.175 | 910.2866 | 2202.263 | 196.2062 | 312.0343 |
| 117.9182 | 1118.693 | 993.9022 | 40514.11 | 498.6413 | 7079.387 | 910.3099 | 2202.653 | 196.2277 | 312.0557 |
| 117.9713 | 1118.727 | 994.0924 | 40518.68 | 498.6565 | 7079.622 | 910.3379 | 2203.065 | 196.241  | 312.0688 |
| 118.0367 | 1118.775 | 994.0677 | 40524.31 | 498.6766 | 7079.919 | 910.3745 | 2203.572 | 196.2517 | 312.0794 |
| 118.1112 | 1118.837 | 993.6558 | 40530.72 | 498.7011 | 7080.265 | 910.419  | 2204.15  | 196.2554 | 312.0831 |
| 118.1646 | 1118.867 | 994.0388 | 40535.3  | 498.7155 | 7080.496 | 910.4456 | 2204.563 | 196.2729 | 312.1004 |
| 118.218  | 1118.902 | 994.2308 | 40539.88 | 498.7308 | 7080.732 | 910.4736 | 2204.976 | 196.2862 | 312.1136 |
| 118.2829 | 1118.948 | 994.2115 | 40545.44 | 498.7505 | 7081.024 | 910.5097 | 2205.477 | 196.2969 | 312.1242 |
| 118.3564 | 1119.008 | 993.843  | 40551.73 | 498.7744 | 7081.363 | 910.5531 | 2206.044 | 196.3014 | 312.1286 |
| 118.4233 | 1119.064 | 993.4424 | 40557.45 | 498.7965 | 7081.673 | 910.5931 | 2206.56  | 196.304  | 312.1313 |

|          |          |          |          |          |          |          |          |          |          |
|----------|----------|----------|----------|----------|----------|----------|----------|----------|----------|
| 118.4774 | 1119.091 | 994.0081 | 40562.06 | 498.8102 | 7081.901 | 910.6185 | 2206.977 | 196.3255 | 312.1526 |
| 118.5276 | 1119.12  | 994.377  | 40566.34 | 498.8236 | 7082.116 | 910.6432 | 2207.364 | 196.3421 | 312.169  |
| 118.5862 | 1119.16  | 994.4509 | 40571.33 | 498.8409 | 7082.377 | 910.6749 | 2207.815 | 196.3536 | 312.1804 |
| 118.6574 | 1119.214 | 994.2862 | 40577.38 | 498.863  | 7082.698 | 910.7152 | 2208.361 | 196.3621 | 312.1888 |
| 118.7298 | 1119.277 | 993.6986 | 40583.53 | 498.8874 | 7083.036 | 910.7594 | 2208.917 | 196.3615 | 312.1883 |
| 118.7896 | 1119.316 | 993.8592 | 40588.6  | 498.9046 | 7083.298 | 910.7909 | 2209.376 | 196.3751 | 312.2017 |
| 118.8397 | 1119.339 | 994.4514 | 40592.84 | 498.9169 | 7083.506 | 910.8137 | 2209.76  | 196.3965 | 312.2229 |
| 118.8928 | 1119.373 | 994.641  | 40597.33 | 498.9319 | 7083.736 | 910.8411 | 2210.166 | 196.4095 | 312.2359 |
| 118.9582 | 1119.42  | 994.6156 | 40602.86 | 498.9515 | 7084.027 | 910.877  | 2210.667 | 196.42   | 312.2462 |
| 119.0327 | 1119.48  | 994.2026 | 40609.15 | 498.9756 | 7084.368 | 910.9208 | 2211.236 | 196.4235 | 312.2497 |
| 119.0861 | 1119.51  | 994.5852 | 40613.65 | 498.9898 | 7084.594 | 910.9469 | 2211.644 | 196.4408 | 312.2668 |
| 119.1395 | 1119.544 | 994.7767 | 40618.14 | 499.0048 | 7084.825 | 910.9744 | 2212.051 | 196.4539 | 312.2798 |
| 119.2044 | 1119.59  | 994.7567 | 40623.6  | 499.0241 | 7085.112 | 911.0097 | 2212.546 | 196.4643 | 312.2902 |
| 119.2779 | 1119.649 | 994.3871 | 40629.77 | 499.0476 | 7085.445 | 911.0524 | 2213.105 | 196.4686 | 312.2944 |
| 119.3448 | 1119.704 | 993.9855 | 40635.38 | 499.0693 | 7085.75  | 911.0917 | 2213.614 | 196.471  | 312.2968 |
| 119.3989 | 1119.73  | 994.551  | 40639.91 | 499.0827 | 7085.973 | 911.1166 | 2214.025 | 196.4923 | 312.3179 |
| 119.4491 | 1119.758 | 994.9195 | 40644.11 | 499.0958 | 7086.184 | 911.1408 | 2214.407 | 196.5087 | 312.3342 |
| 119.5078 | 1119.797 | 994.9928 | 40649.01 | 499.1128 | 7086.44  | 911.1719 | 2214.851 | 196.5201 | 312.3454 |
| 119.5789 | 1119.85  | 994.8272 | 40654.94 | 499.1346 | 7086.755 | 911.2114 | 2215.391 | 196.5283 | 312.3536 |
| 119.6513 | 1119.912 | 994.2385 | 40660.98 | 499.1586 | 7087.087 | 911.255  | 2215.939 | 196.5275 | 312.3528 |
| 119.7111 | 1119.951 | 994.3985 | 40665.96 | 499.1754 | 7087.344 | 911.2858 | 2216.391 | 196.5409 | 312.366  |
| 119.7613 | 1119.974 | 994.9904 | 40670.12 | 499.1874 | 7087.548 | 911.3081 | 2216.77  | 196.5621 | 312.387  |
| 119.8143 | 1120.007 | 995.1796 | 40674.53 | 499.2021 | 7087.774 | 911.3351 | 2217.171 | 196.575  | 312.3998 |
| 119.8798 | 1120.053 | 995.1533 | 40679.96 | 499.2214 | 7088.06  | 911.3703 | 2217.665 | 196.5852 | 312.41   |
| 119.9543 | 1120.112 | 994.7393 | 40686.13 | 499.2451 | 7088.394 | 911.4133 | 2218.227 | 196.5885 | 312.4132 |
| 120.0076 | 1120.142 | 995.1216 | 40690.54 | 499.259  | 7088.616 | 911.4389 | 2218.629 | 196.6056 | 312.4302 |
| 120.061  | 1120.175 | 995.3125 | 40694.95 | 499.2737 | 7088.843 | 911.4658 | 2219.03  | 196.6185 | 312.443  |
| 120.1259 | 1120.22  | 995.2918 | 40700.31 | 499.2927 | 7089.125 | 911.5006 | 2219.518 | 196.6287 | 312.4531 |
| 120.1994 | 1120.278 | 994.9212 | 40706.37 | 499.3158 | 7089.452 | 911.5425 | 2220.07  | 196.6327 | 312.4571 |
| 120.2663 | 1120.332 | 994.5187 | 40711.88 | 499.3371 | 7089.751 | 911.5812 | 2220.572 | 196.6349 | 312.4593 |
| 120.3204 | 1120.358 | 995.0839 | 40716.32 | 499.3502 | 7089.97  | 911.6055 | 2220.977 | 196.6561 | 312.4802 |
| 120.3706 | 1120.385 | 995.452  | 40720.44 | 499.3631 | 7090.177 | 911.6292 | 2221.354 | 196.6723 | 312.4963 |
| 120.4293 | 1120.423 | 995.5247 | 40725.25 | 499.3797 | 7090.428 | 911.6597 | 2221.793 | 196.6835 | 312.5074 |
| 120.5004 | 1120.475 | 995.3582 | 40731.08 | 499.4011 | 7090.738 | 911.6986 | 2222.324 | 196.6914 | 312.5153 |

|          |          |          |          |          |          |          |          |          |          |
|----------|----------|----------|----------|----------|----------|----------|----------|----------|----------|
| 120.5728 | 1120.537 | 994.7683 | 40737    | 499.4247 | 7091.064 | 911.7414 | 2222.865 | 196.6904 | 312.5142 |
| 120.6326 | 1120.574 | 994.9278 | 40741.89 | 499.4413 | 7091.316 | 911.7717 | 2223.312 | 196.7036 | 312.5273 |
| 120.6828 | 1120.596 | 995.5195 | 40745.98 | 499.453  | 7091.516 | 911.7935 | 2223.685 | 196.7246 | 312.5482 |
| 120.7358 | 1120.629 | 995.7082 | 40750.3  | 499.4674 | 7091.738 | 911.8199 | 2224.08  | 196.7373 | 312.5608 |
| 120.8013 | 1120.674 | 995.6812 | 40755.63 | 499.4863 | 7092.018 | 911.8545 | 2224.568 | 196.7474 | 312.5707 |
| 120.8758 | 1120.733 | 995.2662 | 40761.69 | 499.5097 | 7092.347 | 911.8968 | 2225.122 | 196.7504 | 312.5737 |
| 120.9292 | 1120.761 | 995.648  | 40766.02 | 499.5232 | 7092.564 | 911.9218 | 2225.518 | 196.7673 | 312.5905 |
| 120.9826 | 1120.794 | 995.8385 | 40770.35 | 499.5376 | 7092.787 | 911.9482 | 2225.914 | 196.7801 | 312.6031 |
| 121.0474 | 1120.838 | 995.817  | 40775.6  | 499.5563 | 7093.063 | 911.9823 | 2226.396 | 196.7901 | 312.6131 |
| 121.121  | 1120.895 | 995.4455 | 40781.55 | 499.579  | 7093.385 | 912.0236 | 2226.94  | 196.7938 | 312.6168 |
| 121.1878 | 1120.948 | 995.042  | 40786.96 | 499.6    | 7093.679 | 912.0616 | 2227.435 | 196.7958 | 312.6187 |
| 121.2419 | 1120.973 | 995.6069 | 40791.32 | 499.6128 | 7093.893 | 912.0853 | 2227.835 | 196.8168 | 312.6395 |
| 121.2922 | 1121     | 995.9747 | 40795.37 | 499.6254 | 7094.097 | 912.1086 | 2228.206 | 196.8329 | 312.6555 |
| 121.3508 | 1121.038 | 996.0468 | 40800.09 | 499.6417 | 7094.342 | 912.1385 | 2228.639 | 196.8438 | 312.6663 |
| 121.4219 | 1121.089 | 995.8794 | 40805.81 | 499.6627 | 7094.647 | 912.1767 | 2229.164 | 196.8516 | 312.674  |
| 121.4943 | 1121.149 | 995.2885 | 40811.62 | 499.686  | 7094.967 | 912.2188 | 2229.697 | 196.8503 | 312.6727 |
| 121.5541 | 1121.186 | 995.4474 | 40816.42 | 499.7022 | 7095.215 | 912.2485 | 2230.137 | 196.8633 | 312.6856 |
| 121.6043 | 1121.208 | 996.0388 | 40820.43 | 499.7136 | 7095.411 | 912.2698 | 2230.506 | 196.8842 | 312.7063 |
| 121.6574 | 1121.239 | 996.227  | 40824.67 | 499.7278 | 7095.628 | 912.2958 | 2230.896 | 196.8967 | 312.7187 |
| 121.7228 | 1121.284 | 996.1993 | 40829.9  | 499.7464 | 7095.904 | 912.3297 | 2231.376 | 196.9065 | 312.7285 |
| 121.7973 | 1121.341 | 995.7833 | 40835.85 | 499.7693 | 7096.226 | 912.3713 | 2231.923 | 196.9093 | 312.7312 |
| 121.8507 | 1121.369 | 996.1647 | 40840.1  | 499.7826 | 7096.44  | 912.3958 | 2232.314 | 196.9261 | 312.7478 |
| 121.9041 | 1121.401 | 996.3548 | 40844.35 | 499.7967 | 7096.658 | 912.4217 | 2232.705 | 196.9387 | 312.7603 |
| 121.969  | 1121.445 | 996.3326 | 40849.51 | 499.815  | 7096.929 | 912.4552 | 2233.179 | 196.9485 | 312.77   |
| 122.0425 | 1121.501 | 995.9601 | 40855.35 | 499.8374 | 7097.245 | 912.4958 | 2233.717 | 196.952  | 312.7735 |
| 122.1094 | 1121.553 | 995.5556 | 40860.65 | 499.858  | 7097.534 | 912.5331 | 2234.205 | 196.9537 | 312.7752 |
| 122.1635 | 1121.578 | 996.1202 | 40864.93 | 499.8705 | 7097.744 | 912.5564 | 2234.599 | 196.9746 | 312.7959 |
| 122.2137 | 1121.603 | 996.4877 | 40868.91 | 499.8828 | 7097.944 | 912.5792 | 2234.965 | 196.9905 | 312.8117 |
| 122.2723 | 1121.641 | 996.5592 | 40873.54 | 499.8989 | 7098.185 | 912.6085 | 2235.392 | 197.0012 | 312.8223 |
| 122.3435 | 1121.691 | 996.391  | 40879.15 | 499.9195 | 7098.484 | 912.646  | 2235.91  | 197.0088 | 312.8298 |
| 122.4159 | 1121.75  | 995.799  | 40884.86 | 499.9424 | 7098.798 | 912.6874 | 2236.436 | 197.0072 | 312.8283 |
| 122.4757 | 1121.786 | 995.9573 | 40889.57 | 499.9583 | 7099.041 | 912.7166 | 2236.87  | 197.0201 | 312.841  |
| 122.5258 | 1121.808 | 996.5486 | 40893.51 | 499.9695 | 7099.233 | 912.7374 | 2237.234 | 197.0408 | 312.8615 |
| 122.5789 | 1121.839 | 996.7363 | 40897.67 | 499.9833 | 7099.447 | 912.7628 | 2237.618 | 197.0532 | 312.8738 |

|          |          |          |          |          |          |          |          |          |          |
|----------|----------|----------|----------|----------|----------|----------|----------|----------|----------|
| 122.6443 | 1121.882 | 996.7079 | 40902.8  | 500.0016 | 7099.718 | 912.7962 | 2238.092 | 197.0628 | 312.8833 |
| 122.7188 | 1121.939 | 996.2908 | 40908.64 | 500.0241 | 7100.034 | 912.8371 | 2238.631 | 197.0653 | 312.8858 |
| 122.7722 | 1121.966 | 996.6719 | 40912.81 | 500.0371 | 7100.244 | 912.8611 | 2239.017 | 197.0819 | 312.9023 |
| 122.8256 | 1121.997 | 996.8615 | 40916.98 | 500.051  | 7100.458 | 912.8865 | 2239.402 | 197.0943 | 312.9146 |
| 122.8905 | 1122.04  | 996.8386 | 40922.05 | 500.069  | 7100.724 | 912.9194 | 2239.87  | 197.1039 | 312.9241 |
| 122.964  | 1122.095 | 996.4651 | 40927.78 | 500.091  | 7101.035 | 912.9592 | 2240.4   | 197.1072 | 312.9274 |
| 123.0309 | 1122.147 | 996.0598 | 40932.99 | 500.1112 | 7101.318 | 912.996  | 2240.882 | 197.1087 | 312.9289 |
| 123.085  | 1122.171 | 996.6241 | 40937.19 | 500.1235 | 7101.524 | 913.0187 | 2241.271 | 197.1294 | 312.9494 |
| 123.1352 | 1122.196 | 996.9912 | 40941.09 | 500.1356 | 7101.72  | 913.041  | 2241.632 | 197.1452 | 312.965  |
| 123.1939 | 1122.233 | 997.0622 | 40945.63 | 500.1513 | 7101.957 | 913.0698 | 2242.053 | 197.1558 | 312.9755 |
| 123.265  | 1122.282 | 996.8931 | 40951.14 | 500.1715 | 7102.25  | 913.1067 | 2242.563 | 197.163  | 312.9827 |
| 123.3374 | 1122.341 | 996.3001 | 40956.75 | 500.1941 | 7102.559 | 913.1474 | 2243.082 | 197.1613 | 312.981  |
| 123.3972 | 1122.376 | 996.4579 | 40961.37 | 500.2096 | 7102.798 | 913.176  | 2243.511 | 197.1739 | 312.9935 |
| 123.4474 | 1122.396 | 997.0489 | 40965.23 | 500.2206 | 7102.986 | 913.1964 | 2243.869 | 197.1945 | 313.0139 |
| 123.5004 | 1122.427 | 997.2361 | 40969.32 | 500.2342 | 7103.196 | 913.2213 | 2244.248 | 197.2067 | 313.026  |
| 123.5659 | 1122.469 | 997.2071 | 40974.36 | 500.2521 | 7103.461 | 913.254  | 2244.716 | 197.2161 | 313.0353 |
| 123.6404 | 1122.526 | 996.789  | 40980.09 | 500.2743 | 7103.772 | 913.2943 | 2245.248 | 197.2184 | 313.0376 |
| 123.6937 | 1122.552 | 997.1698 | 40984.18 | 500.287  | 7103.978 | 913.3177 | 2245.628 | 197.2349 | 313.0539 |
| 123.7471 | 1122.583 | 997.3589 | 40988.28 | 500.3006 | 7104.188 | 913.3427 | 2246.008 | 197.2471 | 313.066  |
| 123.812  | 1122.625 | 997.3353 | 40993.25 | 500.3183 | 7104.449 | 913.3749 | 2246.47  | 197.2565 | 313.0753 |
| 123.8855 | 1122.679 | 996.9609 | 40998.87 | 500.3399 | 7104.754 | 913.4141 | 2246.993 | 197.2596 | 313.0784 |
| 123.9524 | 1122.73  | 996.5546 | 41003.98 | 500.3598 | 7105.032 | 913.4503 | 2247.468 | 197.2609 | 313.0797 |
| 124.0065 | 1122.753 | 997.1187 | 41008.11 | 500.3718 | 7105.235 | 913.4725 | 2247.851 | 197.2814 | 313.1    |
| 124.0568 | 1122.778 | 997.4855 | 41011.93 | 500.3836 | 7105.426 | 913.4943 | 2248.207 | 197.297  | 313.1155 |
| 124.1154 | 1122.813 | 997.5558 | 41016.4  | 500.399  | 7105.659 | 913.5226 | 2248.623 | 197.3074 | 313.1258 |
| 124.1865 | 1122.862 | 997.386  | 41021.81 | 500.4189 | 7105.947 | 913.5588 | 2249.126 | 197.3145 | 313.1328 |
| 124.2589 | 1122.92  | 996.7919 | 41027.31 | 500.4411 | 7106.251 | 913.5989 | 2249.638 | 197.3125 | 313.1308 |
| 124.3187 | 1122.955 | 996.9492 | 41031.84 | 500.4564 | 7106.485 | 913.627  | 2250.06  | 197.3249 | 313.1432 |
| 124.3689 | 1122.974 | 997.54   | 41035.63 | 500.4671 | 7106.669 | 913.6469 | 2250.414 | 197.3454 | 313.1634 |
| 124.4219 | 1123.004 | 997.7268 | 41039.64 | 500.4804 | 7106.875 | 913.6713 | 2250.788 | 197.3574 | 313.1754 |
| 124.4874 | 1123.046 | 997.697  | 41044.59 | 500.498  | 7107.135 | 913.7034 | 2251.249 | 197.3666 | 313.1845 |
| 124.5619 | 1123.101 | 997.278  | 41050.21 | 500.5198 | 7107.441 | 913.743  | 2251.774 | 197.3687 | 313.1865 |
| 124.6153 | 1123.127 | 997.6584 | 41054.23 | 500.5323 | 7107.643 | 913.766  | 2252.149 | 197.385  | 313.2027 |
| 124.6687 | 1123.157 | 997.8471 | 41058.25 | 500.5456 | 7107.849 | 913.7904 | 2252.524 | 197.3971 | 313.2147 |

|          |          |          |          |          |          |          |          |          |          |
|----------|----------|----------|----------|----------|----------|----------|----------|----------|----------|
| 124.7336 | 1123.198 | 997.8228 | 41063.13 | 500.5629 | 7108.106 | 913.8221 | 2252.979 | 197.4063 | 313.2238 |
| 124.8071 | 1123.252 | 997.4475 | 41068.65 | 500.5842 | 7108.405 | 913.8606 | 2253.495 | 197.4091 | 313.2266 |
| 124.8739 | 1123.302 | 997.0404 | 41073.67 | 500.6038 | 7108.678 | 913.8962 | 2253.963 | 197.4102 | 313.2277 |
| 124.928  | 1123.325 | 997.6042 | 41077.72 | 500.6155 | 7108.877 | 913.9179 | 2254.342 | 197.4306 | 313.2479 |
| 124.9783 | 1123.349 | 997.9706 | 41081.47 | 500.6271 | 7109.065 | 913.9393 | 2254.693 | 197.446  | 313.2632 |
| 125.0369 | 1123.384 | 998.0404 | 41085.85 | 500.6422 | 7109.293 | 913.967  | 2255.102 | 197.4563 | 313.2733 |
| 125.108  | 1123.432 | 997.8698 | 41091.16 | 500.6618 | 7109.576 | 914.0026 | 2255.599 | 197.4631 | 313.2801 |
| 125.1804 | 1123.488 | 997.2747 | 41096.56 | 500.6836 | 7109.874 | 914.0421 | 2256.104 | 197.4609 | 313.2779 |
| 125.2403 | 1123.522 | 997.4314 | 41101.01 | 500.6986 | 7110.104 | 914.0696 | 2256.52  | 197.4732 | 313.2901 |
| 125.2904 | 1123.542 | 998.022  | 41104.73 | 500.709  | 7110.285 | 914.089  | 2256.869 | 197.4935 | 313.3102 |
| 125.3435 | 1123.571 | 998.2084 | 41108.67 | 500.7221 | 7110.487 | 914.113  | 2257.238 | 197.5054 | 313.322  |
| 125.4089 | 1123.612 | 998.1779 | 41113.53 | 500.7394 | 7110.742 | 914.1446 | 2257.693 | 197.5144 | 313.3309 |
| 125.4834 | 1123.667 | 997.758  | 41119.05 | 500.7608 | 7111.042 | 914.1834 | 2258.21  | 197.5162 | 313.3327 |
| 125.5368 | 1123.692 | 998.138  | 41122.99 | 500.773  | 7111.24  | 914.2059 | 2258.58  | 197.5323 | 313.3487 |
| 125.5902 | 1123.721 | 998.3262 | 41126.93 | 500.7861 | 7111.442 | 914.2299 | 2258.95  | 197.5443 | 313.3606 |
| 125.6551 | 1123.762 | 998.3014 | 41131.72 | 500.8031 | 7111.694 | 914.261  | 2259.399 | 197.5533 | 313.3695 |
| 125.7286 | 1123.814 | 997.9251 | 41137.14 | 500.824  | 7111.988 | 914.2989 | 2259.908 | 197.5559 | 313.3721 |
| 125.7955 | 1123.864 | 997.5171 | 41142.07 | 500.8432 | 7112.257 | 914.3339 | 2260.37  | 197.5568 | 313.373  |
| 125.8496 | 1123.886 | 998.0807 | 41146.04 | 500.8547 | 7112.451 | 914.3551 | 2260.743 | 197.577  | 313.393  |
| 125.8998 | 1123.909 | 998.4468 | 41149.72 | 500.866  | 7112.636 | 914.3761 | 2261.089 | 197.5923 | 313.4082 |
| 125.9584 | 1123.944 | 998.5161 | 41154.02 | 500.8809 | 7112.86  | 914.4033 | 2261.493 | 197.6024 | 313.4181 |
| 126.0296 | 1123.99  | 998.3446 | 41159.23 | 500.9001 | 7113.138 | 914.4382 | 2261.983 | 197.609  | 313.4247 |
| 126.102  | 1124.047 | 997.7485 | 41164.53 | 500.9216 | 7113.431 | 914.477  | 2262.481 | 197.6066 | 313.4223 |
| 126.1618 | 1124.08  | 997.9047 | 41168.9  | 500.9363 | 7113.656 | 914.504  | 2262.892 | 197.6187 | 313.4343 |
| 126.212  | 1124.099 | 998.4951 | 41172.56 | 500.9465 | 7113.833 | 914.523  | 2263.236 | 197.6388 | 313.4543 |
| 126.265  | 1124.127 | 998.6811 | 41176.42 | 500.9593 | 7114.032 | 914.5465 | 2263.6   | 197.6506 | 313.4659 |
| 126.3305 | 1124.168 | 998.65   | 41181.19 | 500.9763 | 7114.283 | 914.5775 | 2264.048 | 197.6594 | 313.4746 |
| 126.4049 | 1124.221 | 998.2291 | 41186.6  | 500.9973 | 7114.577 | 914.6157 | 2264.558 | 197.661  | 313.4762 |
| 126.4583 | 1124.246 | 998.6088 | 41190.48 | 501.0093 | 7114.771 | 914.6378 | 2264.923 | 197.677  | 313.4921 |
| 126.5117 | 1124.275 | 998.7966 | 41194.35 | 501.0221 | 7114.97  | 914.6613 | 2265.288 | 197.6888 | 313.5038 |
| 126.5766 | 1124.314 | 998.7711 | 41199.05 | 501.0388 | 7115.217 | 914.6918 | 2265.731 | 197.6976 | 313.5125 |
| 126.6501 | 1124.366 | 998.3939 | 41204.37 | 501.0593 | 7115.506 | 914.7291 | 2266.233 | 197.6999 | 313.5149 |
| 126.717  | 1124.415 | 997.9851 | 41209.2  | 501.0783 | 7115.77  | 914.7635 | 2266.688 | 197.7007 | 313.5156 |
| 126.7711 | 1124.436 | 998.5484 | 41213.1  | 501.0895 | 7115.96  | 914.7842 | 2267.056 | 197.7207 | 313.5354 |

|          |          |          |          |          |          |          |          |          |          |
|----------|----------|----------|----------|----------|----------|----------|----------|----------|----------|
| 126.8213 | 1124.459 | 998.9142 | 41216.72 | 501.1006 | 7116.141 | 914.8048 | 2267.398 | 197.7359 | 313.5505 |
| 126.88   | 1124.493 | 998.9829 | 41220.94 | 501.1152 | 7116.361 | 914.8315 | 2267.797 | 197.7458 | 313.5603 |
| 126.9511 | 1124.539 | 998.8107 | 41226.05 | 501.134  | 7116.634 | 914.8658 | 2268.279 | 197.7522 | 313.5667 |
| 127.0235 | 1124.594 | 998.2136 | 41231.25 | 501.1552 | 7116.922 | 914.904  | 2268.771 | 197.7495 | 313.564  |
| 127.0833 | 1124.627 | 998.3693 | 41235.54 | 501.1696 | 7117.143 | 914.9304 | 2269.176 | 197.7615 | 313.5759 |
| 127.1335 | 1124.645 | 998.9595 | 41239.13 | 501.1796 | 7117.317 | 914.949  | 2269.515 | 197.7815 | 313.5957 |
| 127.1865 | 1124.673 | 999.145  | 41242.92 | 501.1921 | 7117.511 | 914.9721 | 2269.874 | 197.7931 | 313.6072 |
| 127.252  | 1124.713 | 999.1133 | 41247.6  | 501.2088 | 7117.758 | 915.0025 | 2270.316 | 197.8017 | 313.6157 |
| 127.3265 | 1124.766 | 998.6915 | 41252.92 | 501.2295 | 7118.047 | 915.0401 | 2270.819 | 197.8031 | 313.6171 |
| 127.3799 | 1124.79  | 999.0709 | 41256.72 | 501.2412 | 7118.237 | 915.0617 | 2271.179 | 197.8189 | 313.6328 |
| 127.4333 | 1124.818 | 999.2582 | 41260.51 | 501.2538 | 7118.432 | 915.0847 | 2271.539 | 197.8306 | 313.6443 |
| 127.4981 | 1124.857 | 999.2321 | 41265.13 | 501.2702 | 7118.675 | 915.1147 | 2271.976 | 197.8392 | 313.6529 |
| 127.5717 | 1124.908 | 998.854  | 41270.35 | 501.2904 | 7118.959 | 915.1513 | 2272.471 | 197.8414 | 313.655  |
| 127.6385 | 1124.956 | 998.4444 | 41275.09 | 501.309  | 7119.218 | 915.1851 | 2272.92  | 197.8419 | 313.6555 |
| 127.6926 | 1124.977 | 999.0074 | 41278.92 | 501.3199 | 7119.405 | 915.2055 | 2273.283 | 197.8618 | 313.6752 |
| 127.7429 | 1124.999 | 999.3729 | 41282.47 | 501.3308 | 7119.582 | 915.2255 | 2273.62  | 197.8768 | 313.6901 |
| 127.8015 | 1125.032 | 999.4411 | 41286.61 | 501.3451 | 7119.798 | 915.2517 | 2274.013 | 197.8865 | 313.6998 |
| 127.8726 | 1125.078 | 999.2682 | 41291.63 | 501.3637 | 7120.066 | 915.2855 | 2274.489 | 197.8928 | 313.706  |
| 127.945  | 1125.132 | 998.6701 | 41296.74 | 501.3845 | 7120.349 | 915.3231 | 2274.974 | 197.8899 | 313.7031 |
| 128.0048 | 1125.164 | 998.8254 | 41300.95 | 501.3986 | 7120.566 | 915.349  | 2275.373 | 197.9016 | 313.7148 |
| 128.055  | 1125.182 | 999.4153 | 41304.47 | 501.4084 | 7120.736 | 915.3672 | 2275.708 | 197.9215 | 313.7345 |
| 128.1081 | 1125.209 | 999.6004 | 41308.19 | 501.4207 | 7120.927 | 915.3898 | 2276.062 | 197.933  | 313.7458 |
| 128.1735 | 1125.248 | 999.5681 | 41312.78 | 501.437  | 7121.168 | 915.4196 | 2276.498 | 197.9414 | 313.7542 |
| 128.248  | 1125.3   | 999.1454 | 41318    | 501.4574 | 7121.453 | 915.4566 | 2276.994 | 197.9426 | 313.7554 |
| 128.3014 | 1125.324 | 999.5244 | 41321.73 | 501.4689 | 7121.639 | 915.4777 | 2277.35  | 197.9583 | 313.7709 |
| 128.3548 | 1125.351 | 999.7114 | 41325.46 | 501.4812 | 7121.831 | 915.5003 | 2277.704 | 197.9698 | 313.7823 |
| 128.4197 | 1125.39  | 999.6846 | 41329.99 | 501.4973 | 7122.069 | 915.5298 | 2278.135 | 197.9782 | 313.7907 |
| 128.4932 | 1125.44  | 999.3057 | 41335.11 | 501.5171 | 7122.348 | 915.5658 | 2278.623 | 197.9801 | 313.7926 |
| 128.5601 | 1125.487 | 998.8953 | 41339.77 | 501.5355 | 7122.602 | 915.599  | 2279.066 | 197.9805 | 313.7929 |
| 128.6142 | 1125.507 | 999.458  | 41343.52 | 501.5462 | 7122.785 | 915.6189 | 2279.424 | 198.0002 | 313.8125 |
| 128.6644 | 1125.529 | 999.8232 | 41347.01 | 501.5568 | 7122.959 | 915.6385 | 2279.757 | 198.0151 | 313.8272 |
| 128.723  | 1125.562 | 999.8909 | 41351.08 | 501.5709 | 7123.171 | 915.6643 | 2280.144 | 198.0247 | 313.8367 |
| 128.7942 | 1125.606 | 999.7172 | 41356    | 501.5891 | 7123.434 | 915.6974 | 2280.614 | 198.0307 | 313.8427 |
| 128.8666 | 1125.66  | 999.1182 | 41361.01 | 501.6095 | 7123.712 | 915.7344 | 2281.092 | 198.0276 | 313.8397 |

|          |          |          |          |          |          |          |          |          |          |
|----------|----------|----------|----------|----------|----------|----------|----------|----------|----------|
| 128.9264 | 1125.691 | 999.273  | 41365.14 | 501.6234 | 7123.925 | 915.7598 | 2281.486 | 198.0392 | 313.8512 |
| 128.9765 | 1125.709 | 999.8627 | 41368.6  | 501.6329 | 7124.092 | 915.7776 | 2281.816 | 198.059  | 313.8707 |
| 129.0296 | 1125.735 | 1000.047 | 41372.25 | 501.645  | 7124.279 | 915.7997 | 2282.165 | 198.0703 | 313.8819 |
| 129.0951 | 1125.774 | 1000.014 | 41376.76 | 501.661  | 7124.517 | 915.8291 | 2282.595 | 198.0785 | 313.8901 |
| 129.1695 | 1125.825 | 999.5909 | 41381.88 | 501.6811 | 7124.796 | 915.8654 | 2283.085 | 198.0795 | 313.8911 |
| 129.2229 | 1125.848 | 999.9696 | 41385.55 | 501.6923 | 7124.979 | 915.8861 | 2283.435 | 198.095  | 313.9065 |
| 129.2763 | 1125.875 | 1000.156 | 41389.21 | 501.7044 | 7125.166 | 915.9083 | 2283.785 | 198.1064 | 313.9177 |
| 129.3412 | 1125.912 | 1000.129 | 41393.65 | 501.7202 | 7125.4   | 915.9372 | 2284.21  | 198.1146 | 313.9259 |
| 129.4147 | 1125.962 | 999.749  | 41398.68 | 501.7397 | 7125.674 | 915.9726 | 2284.691 | 198.1164 | 313.9276 |
| 129.4816 | 1126.008 | 999.3378 | 41403.25 | 501.7578 | 7125.924 | 916.0053 | 2285.128 | 198.1165 | 313.9278 |
| 129.5357 | 1126.028 | 999.9003 | 41406.94 | 501.7682 | 7126.104 | 916.0247 | 2285.481 | 198.1361 | 313.9472 |
| 129.5859 | 1126.049 | 1000.265 | 41410.36 | 501.7786 | 7126.274 | 916.0439 | 2285.809 | 198.1509 | 313.9618 |
| 129.6446 | 1126.081 | 1000.332 | 41414.35 | 501.7924 | 7126.482 | 916.0692 | 2286.191 | 198.1603 | 313.9711 |
| 129.7157 | 1126.125 | 1000.158 | 41419.18 | 501.8103 | 7126.74  | 916.1017 | 2286.654 | 198.1661 | 313.9769 |
| 129.7881 | 1126.178 | 999.558  | 41424.1  | 501.8304 | 7127.014 | 916.1381 | 2287.125 | 198.1628 | 313.9737 |
| 129.8479 | 1126.209 | 999.7123 | 41428.16 | 501.844  | 7127.223 | 916.1631 | 2287.514 | 198.1743 | 313.985  |
| 129.8981 | 1126.225 | 1000.302 | 41431.55 | 501.8533 | 7127.386 | 916.1804 | 2287.84  | 198.1939 | 314.0044 |
| 129.9511 | 1126.252 | 1000.486 | 41435.14 | 501.8652 | 7127.57  | 916.2021 | 2288.184 | 198.205  | 314.0155 |
| 130.0166 | 1126.289 | 1000.453 | 41439.56 | 501.8809 | 7127.803 | 916.2309 | 2288.608 | 198.2131 | 314.0235 |
| 130.0911 | 1126.34  | 1000.028 | 41444.59 | 501.9006 | 7128.077 | 916.2667 | 2289.091 | 198.2139 | 314.0243 |
| 130.1445 | 1126.362 | 1000.407 | 41448.18 | 501.9116 | 7128.257 | 916.2869 | 2289.436 | 198.2293 | 314.0395 |
| 130.1978 | 1126.389 | 1000.593 | 41451.77 | 501.9235 | 7128.441 | 916.3087 | 2289.781 | 198.2405 | 314.0506 |
| 130.2627 | 1126.426 | 1000.565 | 41456.13 | 501.939  | 7128.67  | 916.337  | 2290.2   | 198.2486 | 314.0586 |
| 130.3363 | 1126.474 | 1000.184 | 41461.07 | 501.9582 | 7128.939 | 916.3719 | 2290.675 | 198.2501 | 314.0602 |
| 130.4031 | 1126.52  | 999.7721 | 41465.56 | 501.9759 | 7129.185 | 916.404  | 2291.106 | 198.2501 | 314.0601 |
| 130.4572 | 1126.539 | 1000.334 | 41469.18 | 501.9861 | 7129.361 | 916.423  | 2291.454 | 198.2695 | 314.0794 |
| 130.5075 | 1126.56  | 1000.699 | 41472.53 | 501.9963 | 7129.528 | 916.4418 | 2291.777 | 198.2841 | 314.0939 |
| 130.5661 | 1126.591 | 1000.766 | 41476.45 | 502.0099 | 7129.732 | 916.4666 | 2292.154 | 198.2934 | 314.1031 |
| 130.6372 | 1126.634 | 1000.591 | 41481.2  | 502.0274 | 7129.986 | 916.4986 | 2292.611 | 198.299  | 314.1087 |
| 130.7096 | 1126.687 | 999.9897 | 41486.03 | 502.0473 | 7130.254 | 916.5344 | 2293.076 | 198.2956 | 314.1052 |
| 130.7694 | 1126.717 | 1000.144 | 41490    | 502.0606 | 7130.459 | 916.5589 | 2293.459 | 198.3068 | 314.1164 |
| 130.8196 | 1126.733 | 1000.733 | 41493.33 | 502.0697 | 7130.62  | 916.5758 | 2293.78  | 198.3263 | 314.1357 |
| 130.8727 | 1126.759 | 1000.917 | 41496.85 | 502.0813 | 7130.8   | 916.5971 | 2294.119 | 198.3373 | 314.1466 |
| 130.9381 | 1126.796 | 1000.883 | 41501.2  | 502.0968 | 7131.029 | 916.6254 | 2294.538 | 198.3452 | 314.1544 |

|          |          |          |          |          |          |          |          |          |          |
|----------|----------|----------|----------|----------|----------|----------|----------|----------|----------|
| 131.0126 | 1126.845 | 1000.457 | 41506.13 | 502.1162 | 7131.298 | 916.6605 | 2295.014 | 198.3458 | 314.155  |
| 131.066  | 1126.867 | 1000.835 | 41509.66 | 502.1269 | 7131.474 | 916.6804 | 2295.354 | 198.361  | 314.1701 |
| 131.1194 | 1126.893 | 1001.021 | 41513.18 | 502.1385 | 7131.655 | 916.7017 | 2295.695 | 198.3721 | 314.1811 |
| 131.1843 | 1126.929 | 1000.993 | 41517.47 | 502.1538 | 7131.88  | 916.7295 | 2296.108 | 198.38   | 314.1889 |
| 131.2578 | 1126.977 | 1000.611 | 41522.31 | 502.1726 | 7132.144 | 916.7638 | 2296.576 | 198.3814 | 314.1903 |
| 131.3247 | 1127.022 | 1000.198 | 41526.72 | 502.1901 | 7132.386 | 916.7954 | 2297.001 | 198.3811 | 314.19   |
| 131.3788 | 1127.041 | 1000.761 | 41530.27 | 502.2    | 7132.558 | 916.814  | 2297.345 | 198.4004 | 314.2092 |
| 131.429  | 1127.061 | 1001.125 | 41533.56 | 502.21   | 7132.722 | 916.8324 | 2297.663 | 198.4149 | 314.2236 |
| 131.4876 | 1127.092 | 1001.191 | 41537.41 | 502.2233 | 7132.922 | 916.8567 | 2298.035 | 198.424  | 314.2326 |
| 131.5588 | 1127.134 | 1001.015 | 41542.07 | 502.2406 | 7133.171 | 916.8881 | 2298.486 | 198.4295 | 314.238  |
| 131.6312 | 1127.186 | 1000.413 | 41546.8  | 502.2601 | 7133.435 | 916.9234 | 2298.944 | 198.4258 | 314.2343 |
| 131.691  | 1127.215 | 1000.567 | 41550.71 | 502.2732 | 7133.637 | 916.9474 | 2299.322 | 198.4369 | 314.2453 |
| 131.7411 | 1127.231 | 1001.156 | 41553.98 | 502.282  | 7133.793 | 916.9639 | 2299.639 | 198.4563 | 314.2645 |
| 131.7942 | 1127.256 | 1001.34  | 41557.43 | 502.2934 | 7133.97  | 916.9848 | 2299.973 | 198.4672 | 314.2753 |
| 131.8597 | 1127.292 | 1001.305 | 41561.69 | 502.3086 | 7134.195 | 917.0126 | 2300.386 | 198.4749 | 314.283  |
| 131.9341 | 1127.341 | 1000.879 | 41566.54 | 502.3277 | 7134.46  | 917.0471 | 2300.855 | 198.4753 | 314.2833 |
| 131.9875 | 1127.363 | 1001.256 | 41570    | 502.3382 | 7134.632 | 917.0666 | 2301.191 | 198.4904 | 314.2983 |
| 132.0409 | 1127.388 | 1001.442 | 41573.46 | 502.3496 | 7134.809 | 917.0874 | 2301.527 | 198.5013 | 314.3091 |
| 132.1058 | 1127.424 | 1001.413 | 41577.66 | 502.3645 | 7135.031 | 917.1148 | 2301.934 | 198.509  | 314.3168 |
| 132.1793 | 1127.471 | 1001.03  | 41582.42 | 502.3831 | 7135.29  | 917.1485 | 2302.396 | 198.5102 | 314.3179 |
| 132.2462 | 1127.515 | 1000.617 | 41586.74 | 502.4003 | 7135.527 | 917.1796 | 2302.815 | 198.5098 | 314.3175 |
| 132.3003 | 1127.533 | 1001.179 | 41590.23 | 502.41   | 7135.696 | 917.1977 | 2303.154 | 198.529  | 314.3366 |
| 132.3505 | 1127.553 | 1001.543 | 41593.46 | 502.4198 | 7135.857 | 917.2158 | 2303.468 | 198.5433 | 314.3508 |
| 132.4092 | 1127.583 | 1001.609 | 41597.24 | 502.4328 | 7136.054 | 917.2396 | 2303.835 | 198.5523 | 314.3597 |
| 132.4803 | 1127.625 | 1001.432 | 41601.81 | 502.4498 | 7136.298 | 917.2705 | 2304.279 | 198.5575 | 314.3649 |
| 132.5527 | 1127.676 | 1000.829 | 41606.46 | 502.469  | 7136.558 | 917.3052 | 2304.731 | 198.5537 | 314.3611 |
| 132.6125 | 1127.705 | 1000.982 | 41610.29 | 502.4818 | 7136.755 | 917.3287 | 2305.104 | 198.5646 | 314.3719 |
| 132.6627 | 1127.72  | 1001.571 | 41613.5  | 502.4905 | 7136.909 | 917.3449 | 2305.416 | 198.5839 | 314.391  |
| 132.7157 | 1127.745 | 1001.754 | 41616.89 | 502.5016 | 7137.082 | 917.3653 | 2305.746 | 198.5946 | 314.4016 |
| 132.7812 | 1127.78  | 1001.719 | 41621.07 | 502.5165 | 7137.303 | 917.3926 | 2306.153 | 198.6022 | 314.4091 |
| 132.8557 | 1127.828 | 1001.292 | 41625.83 | 502.5353 | 7137.563 | 917.4266 | 2306.616 | 198.6023 | 314.4093 |
| 132.9091 | 1127.849 | 1001.67  | 41629.23 | 502.5456 | 7137.732 | 917.4456 | 2306.947 | 198.6173 | 314.4241 |
| 132.9625 | 1127.874 | 1001.855 | 41632.62 | 502.5567 | 7137.906 | 917.4661 | 2307.278 | 198.6281 | 314.4348 |
| 133.0273 | 1127.909 | 1001.825 | 41636.75 | 502.5714 | 7138.123 | 917.4929 | 2307.68  | 198.6357 | 314.4423 |



|          |          |          |          |          |          |          |          |          |          |
|----------|----------|----------|----------|----------|----------|----------|----------|----------|----------|
| 133.1009 | 1127.956 | 1001.442 | 41641.42 | 502.5897 | 7138.378 | 917.526  | 2308.135 | 198.6366 | 314.4433 |
| 133.1677 | 1127.999 | 1001.028 | 41645.66 | 502.6066 | 7138.611 | 917.5566 | 2308.549 | 198.6361 | 314.4427 |
| 133.2218 | 1128.017 | 1001.589 | 41649.08 | 502.6161 | 7138.777 | 917.5744 | 2308.883 | 198.6551 | 314.4616 |
| 133.2721 | 1128.036 | 1001.953 | 41652.26 | 502.6257 | 7138.934 | 917.592  | 2309.193 | 198.6694 | 314.4757 |
| 133.3307 | 1128.066 | 1002.018 | 41655.96 | 502.6384 | 7139.127 | 917.6154 | 2309.554 | 198.6781 | 314.4844 |
| 133.4018 | 1128.107 | 1001.841 | 41660.45 | 502.6551 | 7139.367 | 917.6458 | 2309.992 | 198.6832 | 314.4895 |
| 133.4742 | 1128.157 | 1001.238 | 41665.01 | 502.674  | 7139.622 | 917.6799 | 2310.438 | 198.6792 | 314.4854 |
| 133.534  | 1128.185 | 1001.39  | 41668.78 | 502.6866 | 7139.816 | 917.703  | 2310.806 | 198.69   | 314.4962 |
| 133.5842 | 1128.2   | 1001.979 | 41671.92 | 502.695  | 7139.967 | 917.7188 | 2311.114 | 198.7091 | 314.5151 |
| 133.6373 | 1128.224 | 1002.162 | 41675.25 | 502.706  | 7140.137 | 917.7388 | 2311.439 | 198.7197 | 314.5256 |
| 133.7027 | 1128.259 | 1002.126 | 41679.36 | 502.7206 | 7140.353 | 917.7656 | 2311.841 | 198.7271 | 314.5329 |
| 133.7772 | 1128.306 | 1001.698 | 41684.03 | 502.7391 | 7140.609 | 917.799  | 2312.297 | 198.7271 | 314.5329 |
| 133.8306 | 1128.327 | 1002.075 | 41687.36 | 502.7491 | 7140.775 | 917.8176 | 2312.624 | 198.7419 | 314.5476 |
| 133.884  | 1128.351 | 1002.26  | 41690.69 | 502.7601 | 7140.945 | 917.8377 | 2312.95  | 198.7526 | 314.5582 |
| 133.9489 | 1128.385 | 1002.23  | 41694.74 | 502.7745 | 7141.159 | 917.8641 | 2313.346 | 198.76   | 314.5655 |
| 134.0224 | 1128.431 | 1001.846 | 41699.33 | 502.7925 | 7141.409 | 917.8967 | 2313.795 | 198.7608 | 314.5663 |
| 134.0893 | 1128.474 | 1001.431 | 41703.49 | 502.8091 | 7141.638 | 917.9267 | 2314.203 | 198.76   | 314.5656 |
| 134.1434 | 1128.491 | 1001.992 | 41706.85 | 502.8184 | 7141.8   | 917.9441 | 2314.532 | 198.7789 | 314.5843 |
| 134.1936 | 1128.51  | 1002.356 | 41709.96 | 502.8277 | 7141.955 | 917.9614 | 2314.838 | 198.793  | 314.5983 |
| 134.2522 | 1128.539 | 1002.42  | 41713.6  | 502.8403 | 7142.144 | 917.9843 | 2315.195 | 198.8017 | 314.6069 |
| 134.3234 | 1128.579 | 1002.243 | 41718    | 502.8567 | 7142.38  | 918.0141 | 2315.627 | 198.8066 | 314.6117 |
| 134.3958 | 1128.629 | 1001.638 | 41722.49 | 502.8753 | 7142.63  | 918.0477 | 2316.066 | 198.8024 | 314.6075 |
| 134.4556 | 1128.657 | 1001.79  | 41726.18 | 502.8876 | 7142.821 | 918.0704 | 2316.429 | 198.813  | 314.6181 |
| 134.5058 | 1128.671 | 1002.379 | 41729.27 | 502.8959 | 7142.968 | 918.0858 | 2316.732 | 198.832  | 314.6369 |
| 134.5588 | 1128.694 | 1002.561 | 41732.54 | 502.9066 | 7143.135 | 918.1054 | 2317.053 | 198.8425 | 314.6473 |
| 134.6243 | 1128.729 | 1002.525 | 41736.56 | 502.921  | 7143.348 | 918.1317 | 2317.449 | 198.8497 | 314.6545 |
| 134.6987 | 1128.776 | 1002.096 | 41741.15 | 502.9391 | 7143.599 | 918.1646 | 2317.899 | 198.8495 | 314.6543 |
| 134.7521 | 1128.795 | 1002.473 | 41744.42 | 502.949  | 7143.762 | 918.1828 | 2318.221 | 198.8642 | 314.6689 |
| 134.8055 | 1128.819 | 1002.658 | 41747.69 | 502.9597 | 7143.929 | 918.2025 | 2318.543 | 198.8748 | 314.6793 |
| 134.8704 | 1128.853 | 1002.627 | 41751.67 | 502.9739 | 7144.138 | 918.2284 | 2318.934 | 198.882  | 314.6865 |
| 134.9439 | 1128.898 | 1002.242 | 41756.16 | 502.9915 | 7144.384 | 918.2604 | 2319.377 | 198.8826 | 314.687  |
| 135.0108 | 1128.941 | 1001.827 | 41760.25 | 503.0079 | 7144.609 | 918.29   | 2319.779 | 198.8817 | 314.6861 |
| 135.0649 | 1128.957 | 1002.388 | 41763.55 | 503.0169 | 7144.768 | 918.3069 | 2320.104 | 198.9004 | 314.7048 |
| 135.1151 | 1128.975 | 1002.751 | 41766.6  | 503.0261 | 7144.92  | 918.3239 | 2320.405 | 198.9144 | 314.7186 |

|          |          |          |          |          |          |          |          |          |          |
|----------|----------|----------|----------|----------|----------|----------|----------|----------|----------|
| 135.1738 | 1129.004 | 1002.815 | 41770.17 | 503.0384 | 7145.106 | 918.3464 | 2320.757 | 198.923  | 314.7271 |
| 135.2449 | 1129.043 | 1002.637 | 41774.5  | 503.0545 | 7145.337 | 918.3757 | 2321.183 | 198.9277 | 314.7318 |
| 135.3173 | 1129.092 | 1002.032 | 41778.9  | 503.0728 | 7145.583 | 918.4088 | 2321.616 | 198.9233 | 314.7274 |
| 135.3771 | 1129.119 | 1002.183 | 41782.52 | 503.0849 | 7145.77  | 918.431  | 2321.974 | 198.9338 | 314.7378 |
| 135.4273 | 1129.133 | 1002.772 | 41785.55 | 503.093  | 7145.914 | 918.446  | 2322.273 | 198.9526 | 314.7565 |
| 135.4803 | 1129.156 | 1002.954 | 41788.76 | 503.1035 | 7146.078 | 918.4653 | 2322.59  | 198.963  | 314.7667 |
| 135.5458 | 1129.19  | 1002.917 | 41792.71 | 503.1176 | 7146.287 | 918.4911 | 2322.98  | 198.9701 | 314.7738 |
| 135.6203 | 1129.236 | 1002.488 | 41797.21 | 503.1355 | 7146.534 | 918.5235 | 2323.424 | 198.9697 | 314.7734 |
| 135.6737 | 1129.255 | 1002.864 | 41800.42 | 503.1451 | 7146.693 | 918.5413 | 2323.742 | 198.9843 | 314.7878 |
| 135.7271 | 1129.279 | 1003.048 | 41803.64 | 503.1556 | 7146.857 | 918.5606 | 2324.059 | 198.9947 | 314.7981 |
| 135.792  | 1129.312 | 1003.017 | 41807.54 | 503.1695 | 7147.063 | 918.586  | 2324.444 | 199.0018 | 314.8052 |
| 135.8655 | 1129.356 | 1002.631 | 41811.95 | 503.1869 | 7147.304 | 918.6175 | 2324.881 | 199.0022 | 314.8056 |
| 135.9323 | 1129.398 | 1002.215 | 41815.96 | 503.203  | 7147.525 | 918.6466 | 2325.277 | 199.0011 | 314.8045 |
| 135.9864 | 1129.414 | 1002.776 | 41819.2  | 503.2118 | 7147.681 | 918.6631 | 2325.598 | 199.0197 | 314.823  |
| 136.0367 | 1129.432 | 1003.139 | 41822.2  | 503.2208 | 7147.83  | 918.6797 | 2325.895 | 199.0336 | 314.8368 |
| 136.0953 | 1129.46  | 1003.203 | 41825.7  | 503.2329 | 7148.012 | 918.7018 | 2326.242 | 199.042  | 314.845  |
| 136.1664 | 1129.499 | 1003.024 | 41829.95 | 503.2487 | 7148.24  | 918.7306 | 2326.662 | 199.0465 | 314.8496 |
| 136.2388 | 1129.547 | 1002.418 | 41834.26 | 503.2667 | 7148.482 | 918.7631 | 2327.089 | 199.0419 | 314.845  |
| 136.2987 | 1129.574 | 1002.569 | 41837.82 | 503.2786 | 7148.665 | 918.7849 | 2327.442 | 199.0523 | 314.8553 |
| 136.3488 | 1129.587 | 1003.157 | 41840.8  | 503.2864 | 7148.806 | 918.7996 | 2327.737 | 199.0711 | 314.8739 |
| 136.4019 | 1129.61  | 1003.339 | 41843.95 | 503.2967 | 7148.967 | 918.8185 | 2328.049 | 199.0813 | 314.884  |
| 136.4673 | 1129.643 | 1003.301 | 41847.83 | 503.3106 | 7149.172 | 918.8438 | 2328.434 | 199.0882 | 314.8908 |
| 136.5418 | 1129.688 | 1002.871 | 41852.24 | 503.3282 | 7149.414 | 918.8757 | 2328.872 | 199.0876 | 314.8903 |
| 136.5952 | 1129.707 | 1003.248 | 41855.39 | 503.3376 | 7149.571 | 918.8931 | 2329.185 | 199.1021 | 314.9046 |
| 136.6486 | 1129.73  | 1003.431 | 41858.55 | 503.3479 | 7149.732 | 918.912  | 2329.498 | 199.1124 | 314.9148 |
| 136.7135 | 1129.762 | 1003.399 | 41862.38 | 503.3616 | 7149.933 | 918.937  | 2329.878 | 199.1193 | 314.9217 |
| 136.787  | 1129.806 | 1003.013 | 41866.71 | 503.3786 | 7150.171 | 918.9679 | 2330.308 | 199.1195 | 314.9219 |
| 136.8539 | 1129.847 | 1002.596 | 41870.65 | 503.3945 | 7150.388 | 918.9966 | 2330.7   | 199.1183 | 314.9207 |
| 136.908  | 1129.863 | 1003.157 | 41873.82 | 503.4031 | 7150.541 | 919.0127 | 2331.015 | 199.1368 | 314.939  |
| 136.9582 | 1129.88  | 1003.52  | 41876.77 | 503.4119 | 7150.686 | 919.0289 | 2331.308 | 199.1506 | 314.9527 |
| 137.0169 | 1129.908 | 1003.583 | 41880.2  | 503.4237 | 7150.865 | 919.0506 | 2331.65  | 199.1588 | 314.9608 |
| 137.088  | 1129.946 | 1003.403 | 41884.37 | 503.4393 | 7151.089 | 919.0789 | 2332.065 | 199.1632 | 314.9652 |
| 137.1604 | 1129.993 | 1002.797 | 41888.61 | 503.457  | 7151.326 | 919.111  | 2332.486 | 199.1584 | 314.9604 |
| 137.2202 | 1130.02  | 1002.947 | 41892.1  | 503.4687 | 7151.506 | 919.1323 | 2332.834 | 199.1686 | 314.9706 |

|          |          |          |          |          |          |          |          |          |          |
|----------|----------|----------|----------|----------|----------|----------|----------|----------|----------|
| 137.2704 | 1130.032 | 1003.536 | 41895.02 | 503.4763 | 7151.645 | 919.1466 | 2333.125 | 199.1873 | 314.9891 |
| 137.3234 | 1130.054 | 1003.717 | 41898.11 | 503.4864 | 7151.803 | 919.1652 | 2333.433 | 199.1974 | 314.9991 |
| 137.3889 | 1130.087 | 1003.679 | 41901.92 | 503.5    | 7152.004 | 919.1901 | 2333.812 | 199.2041 | 315.0058 |
| 137.4634 | 1130.132 | 1003.248 | 41906.25 | 503.5173 | 7152.242 | 919.2214 | 2334.244 | 199.2034 | 315.005  |
| 137.5167 | 1130.15  | 1003.624 | 41909.35 | 503.5265 | 7152.395 | 919.2384 | 2334.553 | 199.2177 | 315.0193 |
| 137.5701 | 1130.172 | 1003.807 | 41912.44 | 503.5366 | 7152.553 | 919.257  | 2334.861 | 199.2279 | 315.0293 |
| 137.635  | 1130.204 | 1003.775 | 41916.2  | 503.5501 | 7152.751 | 919.2815 | 2335.236 | 199.2347 | 315.036  |
| 137.7085 | 1130.248 | 1003.388 | 41920.45 | 503.5669 | 7152.984 | 919.3119 | 2335.661 | 199.2347 | 315.0361 |
| 137.7754 | 1130.288 | 1002.97  | 41924.32 | 503.5824 | 7153.198 | 919.3401 | 2336.046 | 199.2333 | 315.0347 |
| 137.8295 | 1130.303 | 1003.531 | 41927.43 | 503.5909 | 7153.347 | 919.3559 | 2336.358 | 199.2517 | 315.0529 |
| 137.8798 | 1130.32  | 1003.893 | 41930.33 | 503.5994 | 7153.49  | 919.3717 | 2336.647 | 199.2654 | 315.0665 |
| 137.9384 | 1130.347 | 1003.956 | 41933.7  | 503.6111 | 7153.666 | 919.393  | 2336.984 | 199.2735 | 315.0745 |
| 138.0095 | 1130.385 | 1003.776 | 41937.79 | 503.6264 | 7153.885 | 919.4208 | 2337.393 | 199.2777 | 315.0787 |
| 138.0819 | 1130.432 | 1003.169 | 41941.95 | 503.6438 | 7154.119 | 919.4524 | 2337.808 | 199.2727 | 315.0738 |
| 138.1417 | 1130.457 | 1003.319 | 41945.38 | 503.6553 | 7154.295 | 919.4733 | 2338.151 | 199.2828 | 315.0838 |
| 138.1919 | 1130.47  | 1003.907 | 41948.24 | 503.6627 | 7154.431 | 919.4873 | 2338.438 | 199.3014 | 315.1021 |
| 138.2449 | 1130.491 | 1004.088 | 41951.28 | 503.6726 | 7154.586 | 919.5055 | 2338.742 | 199.3113 | 315.112  |
| 138.3104 | 1130.523 | 1004.049 | 41955.02 | 503.686  | 7154.783 | 919.5299 | 2339.116 | 199.318  | 315.1186 |
| 138.3849 | 1130.567 | 1003.618 | 41959.27 | 503.703  | 7155.017 | 919.5607 | 2339.541 | 199.317  | 315.1177 |
| 138.4383 | 1130.585 | 1003.994 | 41962.31 | 503.712  | 7155.167 | 919.5774 | 2339.846 | 199.3313 | 315.1318 |
| 138.4917 | 1130.607 | 1004.176 | 41965.34 | 503.7219 | 7155.322 | 919.5956 | 2340.15  | 199.3413 | 315.1417 |
| 138.5566 | 1130.638 | 1004.144 | 41969.03 | 503.7351 | 7155.517 | 919.6196 | 2340.52  | 199.3479 | 315.1483 |
| 138.6301 | 1130.681 | 1003.756 | 41973.21 | 503.7516 | 7155.746 | 919.6496 | 2340.938 | 199.3478 | 315.1482 |
| 138.6969 | 1130.721 | 1003.338 | 41977    | 503.7669 | 7155.956 | 919.6773 | 2341.319 | 199.3462 | 315.1466 |
| 138.751  | 1130.736 | 1003.898 | 41980.06 | 503.7752 | 7156.102 | 919.6927 | 2341.626 | 199.3645 | 315.1647 |
| 138.8013 | 1130.752 | 1004.26  | 41982.9  | 503.7835 | 7156.242 | 919.7082 | 2341.911 | 199.3781 | 315.1782 |
| 138.8599 | 1130.778 | 1004.323 | 41986.21 | 503.795  | 7156.415 | 919.7291 | 2342.243 | 199.386  | 315.1861 |
| 138.9311 | 1130.816 | 1004.142 | 41990.22 | 503.81   | 7156.63  | 919.7564 | 2342.646 | 199.3901 | 315.1901 |
| 139.0035 | 1130.862 | 1003.534 | 41994.31 | 503.8272 | 7156.86  | 919.7875 | 2343.056 | 199.385  | 315.185  |
| 139.0633 | 1130.887 | 1003.684 | 41997.67 | 503.8384 | 7157.033 | 919.808  | 2343.394 | 199.3949 | 315.1949 |
| 139.1134 | 1130.899 | 1004.271 | 42000.48 | 503.8456 | 7157.166 | 919.8217 | 2343.677 | 199.4133 | 315.2131 |
| 139.1665 | 1130.92  | 1004.452 | 42003.46 | 503.8553 | 7157.318 | 919.8395 | 2343.976 | 199.4232 | 315.2229 |
| 139.232  | 1130.951 | 1004.413 | 42007.13 | 503.8685 | 7157.511 | 919.8635 | 2344.346 | 199.4297 | 315.2293 |
| 139.3064 | 1130.995 | 1003.981 | 42011.3  | 503.8852 | 7157.741 | 919.8937 | 2344.765 | 199.4286 | 315.2282 |

|          |          |          |          |          |          |          |          |          |          |
|----------|----------|----------|----------|----------|----------|----------|----------|----------|----------|
| 139.3598 | 1131.012 | 1004.356 | 42014.29 | 503.894  | 7157.889 | 919.9101 | 2345.065 | 199.4427 | 315.2422 |
| 139.4132 | 1131.034 | 1004.539 | 42017.27 | 503.9037 | 7158.041 | 919.9279 | 2345.366 | 199.4526 | 315.252  |
| 139.4781 | 1131.064 | 1004.505 | 42020.89 | 503.9167 | 7158.232 | 919.9515 | 2345.73  | 199.4591 | 315.2584 |
| 139.5516 | 1131.106 | 1004.117 | 42024.99 | 503.9329 | 7158.457 | 919.981  | 2346.143 | 199.4588 | 315.2582 |
| 139.6185 | 1131.146 | 1003.698 | 42028.71 | 503.948  | 7158.663 | 920.0083 | 2346.518 | 199.4571 | 315.2565 |
| 139.6726 | 1131.16  | 1004.258 | 42031.71 | 503.9561 | 7158.806 | 920.0233 | 2346.82  | 199.4752 | 315.2745 |
| 139.7228 | 1131.176 | 1004.62  | 42034.5  | 503.9643 | 7158.944 | 920.0385 | 2347.101 | 199.4887 | 315.2878 |
| 139.7815 | 1131.202 | 1004.683 | 42037.75 | 503.9755 | 7159.113 | 920.059  | 2347.429 | 199.4965 | 315.2956 |
| 139.8526 | 1131.238 | 1004.501 | 42041.69 | 503.9902 | 7159.324 | 920.0858 | 2347.827 | 199.5004 | 315.2994 |
| 139.925  | 1131.284 | 1003.892 | 42045.69 | 504.0072 | 7159.55  | 920.1164 | 2348.231 | 199.4951 | 315.2942 |
| 139.9848 | 1131.309 | 1004.042 | 42049    | 504.0181 | 7159.72  | 920.1366 | 2348.564 | 199.5049 | 315.3039 |
| 140.035  | 1131.32  | 1004.629 | 42051.76 | 504.0252 | 7159.85  | 920.1498 | 2348.843 | 199.5232 | 315.3221 |
| 140.088  | 1131.341 | 1004.81  | 42054.68 | 504.0347 | 7159.999 | 920.1673 | 2349.138 | 199.533  | 315.3317 |
| 140.1535 | 1131.372 | 1004.77  | 42058.28 | 504.0476 | 7160.189 | 920.1909 | 2349.502 | 199.5393 | 315.338  |
| 140.228  | 1131.415 | 1004.337 | 42062.38 | 504.0641 | 7160.415 | 920.2207 | 2349.916 | 199.538  | 315.3367 |
| 140.2814 | 1131.431 | 1004.712 | 42065.31 | 504.0727 | 7160.56  | 920.2366 | 2350.212 | 199.552  | 315.3506 |
| 140.3348 | 1131.452 | 1004.894 | 42068.23 | 504.0822 | 7160.709 | 920.2541 | 2350.508 | 199.5618 | 315.3603 |
| 140.3996 | 1131.483 | 1004.861 | 42071.78 | 504.0949 | 7160.896 | 920.2773 | 2350.867 | 199.5682 | 315.3666 |
| 140.4732 | 1131.524 | 1004.472 | 42075.81 | 504.1109 | 7161.117 | 920.3063 | 2351.274 | 199.5677 | 315.3661 |
| 140.54   | 1131.563 | 1004.052 | 42079.46 | 504.1258 | 7161.32  | 920.3331 | 2351.644 | 199.5659 | 315.3643 |
| 140.5941 | 1131.576 | 1004.612 | 42082.41 | 504.1336 | 7161.461 | 920.3478 | 2351.943 | 199.5839 | 315.3822 |
| 140.6444 | 1131.592 | 1004.974 | 42085.14 | 504.1416 | 7161.595 | 920.3627 | 2352.22  | 199.5972 | 315.3954 |
| 140.703  | 1131.617 | 1005.036 | 42088.33 | 504.1526 | 7161.761 | 920.3828 | 2352.543 | 199.6049 | 315.403  |
| 140.7741 | 1131.653 | 1004.853 | 42092.2  | 504.1671 | 7161.969 | 920.4092 | 2352.935 | 199.6087 | 315.4067 |
| 140.8465 | 1131.698 | 1004.244 | 42096.13 | 504.1838 | 7162.191 | 920.4393 | 2353.333 | 199.6032 | 315.4013 |
| 140.9064 | 1131.722 | 1004.393 | 42099.37 | 504.1946 | 7162.357 | 920.459  | 2353.662 | 199.6129 | 315.4109 |
| 140.9565 | 1131.733 | 1004.98  | 42102.08 | 504.2015 | 7162.485 | 920.472  | 2353.937 | 199.6311 | 315.429  |
| 141.0096 | 1131.754 | 1005.16  | 42104.95 | 504.2108 | 7162.631 | 920.4891 | 2354.228 | 199.6408 | 315.4385 |
| 141.075  | 1131.784 | 1005.12  | 42108.49 | 504.2235 | 7162.818 | 920.5122 | 2354.587 | 199.6469 | 315.4446 |
| 141.1495 | 1131.826 | 1004.687 | 42112.51 | 504.2397 | 7163.04  | 920.5415 | 2354.995 | 199.6455 | 315.4432 |
| 141.2029 | 1131.843 | 1005.062 | 42115.38 | 504.2481 | 7163.182 | 920.5572 | 2355.287 | 199.6594 | 315.457  |
| 141.2563 | 1131.863 | 1005.244 | 42118.25 | 504.2574 | 7163.328 | 920.5743 | 2355.579 | 199.6691 | 315.4666 |
| 141.3212 | 1131.893 | 1005.209 | 42121.74 | 504.2699 | 7163.512 | 920.5971 | 2355.933 | 199.6753 | 315.4727 |
| 141.3947 | 1131.934 | 1004.82  | 42125.69 | 504.2856 | 7163.729 | 920.6256 | 2356.334 | 199.6746 | 315.4721 |

|          |          |          |          |          |          |          |          |          |          |
|----------|----------|----------|----------|----------|----------|----------|----------|----------|----------|
| 141.4616 | 1131.972 | 1004.399 | 42129.28 | 504.3002 | 7163.928 | 920.652  | 2356.699 | 199.6726 | 315.4701 |
| 141.5157 | 1131.985 | 1004.959 | 42132.17 | 504.3079 | 7164.066 | 920.6663 | 2356.993 | 199.6906 | 315.4879 |
| 141.5659 | 1132     | 1005.321 | 42134.85 | 504.3157 | 7164.198 | 920.6809 | 2357.266 | 199.7038 | 315.501  |
| 141.6246 | 1132.025 | 1005.382 | 42137.98 | 504.3265 | 7164.361 | 920.7006 | 2357.585 | 199.7114 | 315.5085 |
| 141.6957 | 1132.061 | 1005.199 | 42141.78 | 504.3408 | 7164.565 | 920.7265 | 2357.971 | 199.715  | 315.5121 |
| 141.7681 | 1132.105 | 1004.589 | 42145.64 | 504.3572 | 7164.783 | 920.7562 | 2358.364 | 199.7093 | 315.5065 |
| 141.8279 | 1132.129 | 1004.738 | 42148.82 | 504.3678 | 7164.946 | 920.7755 | 2358.688 | 199.7189 | 315.516  |
| 141.8781 | 1132.139 | 1005.325 | 42151.48 | 504.3745 | 7165.071 | 920.7882 | 2358.96  | 199.737  | 315.5339 |
| 141.9311 | 1132.159 | 1005.505 | 42154.3  | 504.3836 | 7165.215 | 920.8049 | 2359.247 | 199.7465 | 315.5434 |
| 141.9966 | 1132.189 | 1005.464 | 42157.77 | 504.396  | 7165.398 | 920.8277 | 2359.601 | 199.7526 | 315.5493 |
| 142.0711 | 1132.231 | 1005.03  | 42161.71 | 504.412  | 7165.616 | 920.8565 | 2360.003 | 199.751  | 315.5478 |
| 142.1245 | 1132.247 | 1005.405 | 42164.53 | 504.4202 | 7165.755 | 920.8718 | 2360.291 | 199.7647 | 315.5614 |
| 142.1778 | 1132.267 | 1005.586 | 42167.35 | 504.4294 | 7165.899 | 920.8886 | 2360.579 | 199.7743 | 315.5709 |
| 142.2427 | 1132.296 | 1005.551 | 42170.77 | 504.4416 | 7166.079 | 920.9109 | 2360.928 | 199.7804 | 315.5769 |
| 142.3162 | 1132.336 | 1005.161 | 42174.65 | 504.4571 | 7166.293 | 920.939  | 2361.324 | 199.7796 | 315.5761 |
| 142.3831 | 1132.374 | 1004.74  | 42178.17 | 504.4715 | 7166.488 | 920.965  | 2361.683 | 199.7774 | 315.574  |
| 142.4372 | 1132.386 | 1005.3   | 42181.01 | 504.4789 | 7166.623 | 920.979  | 2361.973 | 199.7953 | 315.5917 |
| 142.4875 | 1132.401 | 1005.661 | 42183.64 | 504.4866 | 7166.753 | 920.9932 | 2362.243 | 199.8084 | 315.6047 |
| 142.5461 | 1132.426 | 1005.722 | 42186.72 | 504.4972 | 7166.912 | 921.0125 | 2362.557 | 199.8158 | 315.6121 |
| 142.6172 | 1132.461 | 1005.539 | 42190.44 | 504.5112 | 7167.113 | 921.038  | 2362.938 | 199.8193 | 315.6155 |
| 142.6896 | 1132.504 | 1004.928 | 42194.23 | 504.5274 | 7167.327 | 921.0672 | 2363.325 | 199.8135 | 315.6097 |
| 142.7494 | 1132.528 | 1005.076 | 42197.35 | 504.5377 | 7167.487 | 921.0862 | 2363.645 | 199.823  | 315.6191 |
| 142.7996 | 1132.538 | 1005.663 | 42199.97 | 504.5443 | 7167.61  | 921.0985 | 2363.913 | 199.8409 | 315.637  |
| 142.8527 | 1132.557 | 1005.843 | 42202.73 | 504.5532 | 7167.751 | 921.115  | 2364.195 | 199.8504 | 315.6463 |
| 142.9181 | 1132.586 | 1005.802 | 42206.13 | 504.5655 | 7167.931 | 921.1373 | 2364.544 | 199.8563 | 315.6521 |
| 142.9926 | 1132.627 | 1005.367 | 42210.01 | 504.5811 | 7168.145 | 921.1656 | 2364.941 | 199.8545 | 315.6504 |
| 143.046  | 1132.643 | 1005.741 | 42212.78 | 504.5892 | 7168.281 | 921.1806 | 2365.225 | 199.8682 | 315.6639 |
| 143.0994 | 1132.663 | 1005.923 | 42215.54 | 504.5981 | 7168.422 | 921.1971 | 2365.509 | 199.8776 | 315.6733 |
| 143.1643 | 1132.691 | 1005.887 | 42218.9  | 504.6102 | 7168.599 | 921.219  | 2365.853 | 199.8835 | 315.6792 |
| 143.2378 | 1132.731 | 1005.497 | 42222.71 | 504.6254 | 7168.809 | 921.2466 | 2366.243 | 199.8826 | 315.6782 |
| 143.3047 | 1132.768 | 1005.075 | 42226.16 | 504.6396 | 7169.001 | 921.2722 | 2366.598 | 199.8803 | 315.676  |
| 143.3588 | 1132.78  | 1005.634 | 42228.95 | 504.6468 | 7169.133 | 921.2858 | 2366.884 | 199.898  | 315.6935 |
| 143.409  | 1132.795 | 1005.995 | 42231.53 | 504.6543 | 7169.26  | 921.2997 | 2367.149 | 199.9111 | 315.7064 |
| 143.4676 | 1132.819 | 1006.056 | 42234.55 | 504.6647 | 7169.417 | 921.3187 | 2367.459 | 199.9184 | 315.7137 |

|          |          |          |          |          |          |          |          |          |          |
|----------|----------|----------|----------|----------|----------|----------|----------|----------|----------|
| 143.5388 | 1132.853 | 1005.872 | 42238.21 | 504.6785 | 7169.614 | 921.3437 | 2367.835 | 199.9217 | 315.717  |
| 143.6112 | 1132.896 | 1005.26  | 42241.93 | 504.6944 | 7169.824 | 921.3725 | 2368.217 | 199.9157 | 315.7111 |
| 143.671  | 1132.919 | 1005.408 | 42244.99 | 504.7046 | 7169.982 | 921.3911 | 2368.532 | 199.9251 | 315.7203 |
| 143.7212 | 1132.929 | 1005.995 | 42247.55 | 504.711  | 7170.102 | 921.4031 | 2368.796 | 199.943  | 315.7381 |
| 143.7742 | 1132.948 | 1006.175 | 42250.27 | 504.7197 | 7170.24  | 921.4192 | 2369.075 | 199.9523 | 315.7473 |
| 143.8397 | 1132.976 | 1006.133 | 42253.61 | 504.7317 | 7170.416 | 921.4412 | 2369.419 | 199.958  | 315.753  |
| 143.9141 | 1133.017 | 1005.698 | 42257.41 | 504.7472 | 7170.627 | 921.4691 | 2369.81  | 199.9561 | 315.7511 |
| 143.9675 | 1133.032 | 1006.072 | 42260.13 | 504.755  | 7170.76  | 921.4837 | 2370.09  | 199.9697 | 315.7645 |
| 144.0209 | 1133.051 | 1006.253 | 42262.84 | 504.7638 | 7170.899 | 921.4998 | 2370.37  | 199.979  | 315.7738 |
| 144.0858 | 1133.08  | 1006.217 | 42266.14 | 504.7756 | 7171.073 | 921.5214 | 2370.709 | 199.9848 | 315.7795 |
| 144.1593 | 1133.119 | 1005.826 | 42269.87 | 504.7906 | 7171.279 | 921.5485 | 2371.094 | 199.9837 | 315.7785 |
| 144.2262 | 1133.155 | 1005.404 | 42273.27 | 504.8045 | 7171.467 | 921.5737 | 2371.443 | 199.9813 | 315.776  |
| 144.2803 | 1133.167 | 1005.963 | 42276    | 504.8116 | 7171.597 | 921.587  | 2371.725 | 199.9989 | 315.7935 |
| 144.3305 | 1133.181 | 1006.323 | 42278.54 | 504.819  | 7171.721 | 921.6006 | 2371.987 | 200.0118 | 315.8063 |
| 144.3892 | 1133.205 | 1006.384 | 42281.5  | 504.8292 | 7171.875 | 921.6193 | 2372.293 | 200.019  | 315.8135 |
| 144.4603 | 1133.238 | 1006.199 | 42285.09 | 504.8427 | 7172.069 | 921.6438 | 2372.663 | 200.0222 | 315.8166 |
| 144.5327 | 1133.281 | 1005.587 | 42288.74 | 504.8584 | 7172.276 | 921.6722 | 2373.04  | 200.0161 | 315.8105 |
| 144.5925 | 1133.303 | 1005.734 | 42291.75 | 504.8684 | 7172.43  | 921.6904 | 2373.351 | 200.0253 | 315.8197 |
| 144.6427 | 1133.312 | 1006.321 | 42294.26 | 504.8746 | 7172.548 | 921.7021 | 2373.611 | 200.0431 | 315.8373 |
| 144.6957 | 1133.331 | 1006.5   | 42296.92 | 504.8831 | 7172.683 | 921.7179 | 2373.886 | 200.0523 | 315.8464 |
| 144.7612 | 1133.359 | 1006.458 | 42300.21 | 504.8949 | 7172.856 | 921.7394 | 2374.225 | 200.0579 | 315.852  |
| 144.8357 | 1133.399 | 1006.022 | 42303.94 | 504.9101 | 7173.063 | 921.7669 | 2374.611 | 200.0558 | 315.8499 |
| 144.8891 | 1133.414 | 1006.396 | 42306.61 | 504.9178 | 7173.194 | 921.7812 | 2374.887 | 200.0693 | 315.8633 |
| 144.9425 | 1133.433 | 1006.577 | 42309.27 | 504.9264 | 7173.33  | 921.797  | 2375.162 | 200.0785 | 315.8724 |
| 145.0074 | 1133.461 | 1006.541 | 42312.51 | 504.938  | 7173.501 | 921.8182 | 2375.497 | 200.0842 | 315.8781 |
| 145.0809 | 1133.499 | 1006.149 | 42316.17 | 504.9528 | 7173.703 | 921.8449 | 2375.877 | 200.083  | 315.8768 |
| 145.1477 | 1133.535 | 1005.726 | 42319.5  | 504.9665 | 7173.888 | 921.8697 | 2376.221 | 200.0804 | 315.8743 |
| 145.2018 | 1133.547 | 1006.285 | 42322.18 | 504.9734 | 7174.015 | 921.8827 | 2376.499 | 200.0979 | 315.8916 |
| 145.2521 | 1133.56  | 1006.645 | 42324.68 | 504.9806 | 7174.137 | 921.8959 | 2376.758 | 200.1107 | 315.9043 |
| 145.3107 | 1133.583 | 1006.705 | 42327.58 | 504.9906 | 7174.288 | 921.9142 | 2377.059 | 200.1178 | 315.9114 |
| 145.3819 | 1133.616 | 1006.52  | 42331.11 | 505.0039 | 7174.478 | 921.9384 | 2377.424 | 200.1208 | 315.9143 |
| 145.4542 | 1133.659 | 1005.907 | 42334.69 | 505.0193 | 7174.682 | 921.9663 | 2377.795 | 200.1146 | 315.9082 |
| 145.5141 | 1133.68  | 1006.055 | 42337.64 | 505.0291 | 7174.833 | 921.9842 | 2378.102 | 200.1237 | 315.9172 |
| 145.5642 | 1133.689 | 1006.641 | 42340.11 | 505.0351 | 7174.948 | 921.9956 | 2378.358 | 200.1414 | 315.9347 |

|          |          |          |          |          |          |          |          |          |          |
|----------|----------|----------|----------|----------|----------|----------|----------|----------|----------|
| 145.6173 | 1133.707 | 1006.82  | 42342.72 | 505.0435 | 7175.081 | 922.0111 | 2378.629 | 200.1505 | 315.9437 |
| 145.6827 | 1133.735 | 1006.777 | 42345.94 | 505.0551 | 7175.251 | 922.0322 | 2378.964 | 200.156  | 315.9492 |
| 145.7572 | 1133.775 | 1006.341 | 42349.61 | 505.0701 | 7175.455 | 922.0592 | 2379.344 | 200.1537 | 315.947  |
| 145.8106 | 1133.789 | 1006.714 | 42352.22 | 505.0776 | 7175.583 | 922.0732 | 2379.616 | 200.1671 | 315.9602 |
| 145.864  | 1133.807 | 1006.895 | 42354.84 | 505.086  | 7175.716 | 922.0887 | 2379.888 | 200.1762 | 315.9693 |
| 145.9289 | 1133.834 | 1006.858 | 42358.02 | 505.0974 | 7175.884 | 922.1095 | 2380.218 | 200.1818 | 315.9748 |
| 146.0024 | 1133.872 | 1006.466 | 42361.61 | 505.1119 | 7176.082 | 922.1358 | 2380.592 | 200.1804 | 315.9734 |
| 146.0693 | 1133.908 | 1006.042 | 42364.88 | 505.1254 | 7176.265 | 922.1602 | 2380.932 | 200.1777 | 315.9707 |
| 146.1234 | 1133.919 | 1006.601 | 42367.52 | 505.1322 | 7176.389 | 922.1728 | 2381.206 | 200.1951 | 315.988  |
| 146.1736 | 1133.932 | 1006.962 | 42369.96 | 505.1392 | 7176.509 | 922.1858 | 2381.461 | 200.2078 | 316.0006 |
| 146.2323 | 1133.955 | 1007.021 | 42372.81 | 505.149  | 7176.657 | 922.2038 | 2381.758 | 200.2148 | 316.0075 |
| 146.3034 | 1133.987 | 1006.836 | 42376.27 | 505.1621 | 7176.843 | 922.2275 | 2382.118 | 200.2176 | 316.0103 |
| 146.3758 | 1134.029 | 1006.222 | 42379.79 | 505.1773 | 7177.043 | 922.255  | 2382.484 | 200.2113 | 316.004  |
| 146.4356 | 1134.05  | 1006.369 | 42382.69 | 505.1869 | 7177.192 | 922.2726 | 2382.786 | 200.2202 | 316.0129 |
| 146.4858 | 1134.059 | 1006.955 | 42385.11 | 505.1927 | 7177.305 | 922.2837 | 2383.039 | 200.2378 | 316.0303 |
| 146.5388 | 1134.077 | 1007.134 | 42387.67 | 505.201  | 7177.435 | 922.2988 | 2383.306 | 200.2468 | 316.0392 |
| 146.6043 | 1134.104 | 1007.091 | 42390.84 | 505.2124 | 7177.602 | 922.3196 | 2383.636 | 200.2522 | 316.0446 |
| 146.6788 | 1134.143 | 1006.653 | 42394.43 | 505.2271 | 7177.802 | 922.3462 | 2384.011 | 200.2498 | 316.0422 |
| 146.7322 | 1134.157 | 1007.027 | 42397    | 505.2344 | 7177.928 | 922.3599 | 2384.279 | 200.2631 | 316.0554 |
| 146.7856 | 1134.175 | 1007.207 | 42399.57 | 505.2427 | 7178.058 | 922.375  | 2384.547 | 200.2721 | 316.0643 |
| 146.8504 | 1134.202 | 1007.17  | 42402.69 | 505.2539 | 7178.223 | 922.3955 | 2384.873 | 200.2775 | 316.0697 |
| 146.924  | 1134.239 | 1006.777 | 42406.22 | 505.2682 | 7178.418 | 922.4213 | 2385.242 | 200.276  | 316.0682 |
| 146.9908 | 1134.274 | 1006.353 | 42409.42 | 505.2814 | 7178.597 | 922.4453 | 2385.577 | 200.2731 | 316.0653 |
| 147.0449 | 1134.285 | 1006.912 | 42412.01 | 505.288  | 7178.719 | 922.4577 | 2385.847 | 200.2905 | 316.0825 |
| 147.0952 | 1134.297 | 1007.272 | 42414.41 | 505.2949 | 7178.836 | 922.4704 | 2386.098 | 200.3031 | 316.095  |
| 147.1538 | 1134.32  | 1007.331 | 42417.21 | 505.3045 | 7178.982 | 922.488  | 2386.391 | 200.31   | 316.1018 |
| 147.2249 | 1134.352 | 1007.145 | 42420.6  | 505.3173 | 7179.165 | 922.5113 | 2386.746 | 200.3127 | 316.1045 |
| 147.2973 | 1134.393 | 1006.53  | 42424.06 | 505.3323 | 7179.362 | 922.5384 | 2387.107 | 200.3062 | 316.098  |
| 147.3572 | 1134.414 | 1006.677 | 42426.9  | 505.3417 | 7179.507 | 922.5556 | 2387.405 | 200.315  | 316.1068 |
| 147.4073 | 1134.422 | 1007.264 | 42429.28 | 505.3474 | 7179.618 | 922.5664 | 2387.654 | 200.3325 | 316.1242 |
| 147.4604 | 1134.439 | 1007.442 | 42431.79 | 505.3555 | 7179.745 | 922.5813 | 2387.918 | 200.3414 | 316.133  |
| 147.5258 | 1134.466 | 1007.398 | 42434.9  | 505.3667 | 7179.91  | 922.6016 | 2388.243 | 200.3467 | 316.1382 |
| 147.6003 | 1134.504 | 1006.96  | 42438.43 | 505.3812 | 7180.106 | 922.6278 | 2388.612 | 200.3441 | 316.1357 |
| 147.6537 | 1134.518 | 1007.334 | 42440.95 | 505.3884 | 7180.229 | 922.6412 | 2388.877 | 200.3573 | 316.1487 |

|          |          |          |          |          |          |          |          |          |          |
|----------|----------|----------|----------|----------|----------|----------|----------|----------|----------|
| 147.7071 | 1134.536 | 1007.513 | 42443.47 | 505.3965 | 7180.357 | 922.6561 | 2389.141 | 200.3662 | 316.1576 |
| 147.772  | 1134.562 | 1007.476 | 42446.53 | 505.4075 | 7180.519 | 922.6761 | 2389.462 | 200.3715 | 316.1628 |
| 147.8455 | 1134.599 | 1007.082 | 42449.99 | 505.4215 | 7180.711 | 922.7016 | 2389.826 | 200.3698 | 316.1612 |
| 147.9124 | 1134.633 | 1006.658 | 42453.14 | 505.4346 | 7180.887 | 922.7252 | 2390.156 | 200.3669 | 316.1582 |
| 147.9665 | 1134.644 | 1007.216 | 42455.68 | 505.441  | 7181.006 | 922.7372 | 2390.423 | 200.3841 | 316.1753 |
| 148.0167 | 1134.656 | 1007.576 | 42458.04 | 505.4477 | 7181.121 | 922.7496 | 2390.67  | 200.3966 | 316.1877 |
| 148.0754 | 1134.678 | 1007.635 | 42460.78 | 505.4571 | 7181.264 | 922.7669 | 2390.959 | 200.4034 | 316.1944 |
| 148.1465 | 1134.709 | 1007.449 | 42464.12 | 505.4697 | 7181.444 | 922.7899 | 2391.309 | 200.406  | 316.197  |
| 148.2189 | 1134.75  | 1006.833 | 42467.5  | 505.4845 | 7181.637 | 922.8165 | 2391.665 | 200.3993 | 316.1904 |
| 148.2787 | 1134.77  | 1006.98  | 42470.3  | 505.4937 | 7181.78  | 922.8334 | 2391.958 | 200.408  | 316.199  |
| 148.3289 | 1134.778 | 1007.566 | 42472.63 | 505.4993 | 7181.888 | 922.8439 | 2392.204 | 200.4255 | 316.2163 |
| 148.3819 | 1134.795 | 1007.744 | 42475.1  | 505.5072 | 7182.013 | 922.8585 | 2392.464 | 200.4343 | 316.225  |
| 148.4474 | 1134.822 | 1007.7   | 42478.15 | 505.5182 | 7182.175 | 922.8785 | 2392.785 | 200.4394 | 316.2301 |
| 148.5219 | 1134.859 | 1007.262 | 42481.61 | 505.5324 | 7182.367 | 922.9043 | 2393.149 | 200.4367 | 316.2275 |
| 148.5753 | 1134.873 | 1007.635 | 42484.08 | 505.5395 | 7182.488 | 922.9174 | 2393.41  | 200.4498 | 316.2404 |
| 148.6286 | 1134.89  | 1007.814 | 42486.56 | 505.5474 | 7182.614 | 922.9319 | 2393.67  | 200.4586 | 316.2492 |
| 148.6935 | 1134.915 | 1007.776 | 42489.56 | 505.5582 | 7182.772 | 922.9516 | 2393.987 | 200.4638 | 316.2543 |
| 148.7671 | 1134.952 | 1007.382 | 42492.96 | 505.572  | 7182.961 | 922.9766 | 2394.345 | 200.462  | 316.2525 |
| 148.8339 | 1134.986 | 1006.957 | 42496.05 | 505.5849 | 7183.134 | 922.9999 | 2394.671 | 200.4589 | 316.2494 |
| 148.888  | 1134.996 | 1007.515 | 42498.55 | 505.5911 | 7183.251 | 923.0116 | 2394.934 | 200.476  | 316.2664 |
| 148.9383 | 1135.008 | 1007.875 | 42500.86 | 505.5977 | 7183.363 | 923.0238 | 2395.178 | 200.4884 | 316.2787 |
| 148.9969 | 1135.029 | 1007.934 | 42503.55 | 505.6069 | 7183.504 | 923.0407 | 2395.462 | 200.4951 | 316.2853 |
| 149.068  | 1135.06  | 1007.747 | 42506.82 | 505.6193 | 7183.68  | 923.0633 | 2395.808 | 200.4975 | 316.2877 |
| 149.1404 | 1135.1   | 1007.131 | 42510.15 | 505.6339 | 7183.87  | 923.0895 | 2396.158 | 200.4907 | 316.281  |
| 149.2003 | 1135.12  | 1007.277 | 42512.89 | 505.6429 | 7184.011 | 923.1061 | 2396.448 | 200.4994 | 316.2895 |
| 149.2504 | 1135.128 | 1007.863 | 42515.18 | 505.6483 | 7184.116 | 923.1163 | 2396.69  | 200.5167 | 316.3067 |
| 149.3035 | 1135.145 | 1008.041 | 42517.61 | 505.6561 | 7184.239 | 923.1306 | 2396.947 | 200.5254 | 316.3153 |
| 149.3689 | 1135.17  | 1007.996 | 42520.6  | 505.6669 | 7184.398 | 923.1503 | 2397.263 | 200.5304 | 316.3203 |
| 149.4434 | 1135.208 | 1007.557 | 42524    | 505.6809 | 7184.587 | 923.1756 | 2397.622 | 200.5276 | 316.3175 |
| 149.4968 | 1135.221 | 1007.93  | 42526.42 | 505.6878 | 7184.706 | 923.1884 | 2397.879 | 200.5405 | 316.3304 |
| 149.5502 | 1135.237 | 1008.109 | 42528.85 | 505.6955 | 7184.829 | 923.2027 | 2398.136 | 200.5493 | 316.339  |
| 149.6151 | 1135.263 | 1008.071 | 42531.8  | 505.7061 | 7184.985 | 923.222  | 2398.448 | 200.5543 | 316.344  |
| 149.6886 | 1135.298 | 1007.676 | 42535.14 | 505.7197 | 7185.17  | 923.2466 | 2398.801 | 200.5524 | 316.3421 |
| 149.7555 | 1135.332 | 1007.251 | 42538.17 | 505.7324 | 7185.34  | 923.2695 | 2399.122 | 200.5491 | 316.3389 |



|          |          |          |          |          |          |          |          |          |          |
|----------|----------|----------|----------|----------|----------|----------|----------|----------|----------|
| 149.8096 | 1135.342 | 1007.809 | 42540.62 | 505.7385 | 7185.454 | 923.281  | 2399.381 | 200.5662 | 316.3558 |
| 149.8598 | 1135.353 | 1008.168 | 42542.89 | 505.7449 | 7185.565 | 923.2928 | 2399.622 | 200.5785 | 316.368  |
| 149.9185 | 1135.374 | 1008.227 | 42545.53 | 505.754  | 7185.702 | 923.3095 | 2399.903 | 200.5851 | 316.3745 |
| 149.9896 | 1135.405 | 1008.039 | 42548.74 | 505.7662 | 7185.876 | 923.3316 | 2400.243 | 200.5874 | 316.3768 |
| 150.062  | 1135.444 | 1007.423 | 42552.01 | 505.7805 | 7186.063 | 923.3575 | 2400.589 | 200.5805 | 316.3699 |
| 150.1218 | 1135.464 | 1007.568 | 42554.7  | 505.7894 | 7186.2   | 923.3737 | 2400.874 | 200.589  | 316.3784 |
| 150.172  | 1135.471 | 1008.155 | 42556.95 | 505.7946 | 7186.304 | 923.3837 | 2401.113 | 200.6062 | 316.3955 |
| 150.225  | 1135.487 | 1008.332 | 42559.33 | 505.8022 | 7186.424 | 923.3977 | 2401.366 | 200.6148 | 316.404  |
| 150.2905 | 1135.513 | 1008.287 | 42562.26 | 505.8128 | 7186.58  | 923.417  | 2401.677 | 200.6197 | 316.4088 |
| 150.365  | 1135.55  | 1007.847 | 42565.6  | 505.8266 | 7186.766 | 923.4419 | 2402.032 | 200.6168 | 316.4059 |
| 150.4184 | 1135.562 | 1008.22  | 42567.98 | 505.8333 | 7186.882 | 923.4544 | 2402.285 | 200.6296 | 316.4187 |
| 150.4717 | 1135.578 | 1008.399 | 42570.37 | 505.8409 | 7187.003 | 923.4684 | 2402.538 | 200.6383 | 316.4272 |
| 150.5366 | 1135.603 | 1008.36  | 42573.26 | 505.8514 | 7187.156 | 923.4874 | 2402.846 | 200.6432 | 316.4321 |
| 150.6101 | 1135.639 | 1007.965 | 42576.54 | 505.8647 | 7187.338 | 923.5116 | 2403.194 | 200.6411 | 316.4301 |
| 150.677  | 1135.672 | 1007.539 | 42579.51 | 505.8772 | 7187.505 | 923.5342 | 2403.511 | 200.6378 | 316.4267 |
| 150.7311 | 1135.681 | 1008.097 | 42581.91 | 505.8831 | 7187.617 | 923.5453 | 2403.767 | 200.6547 | 316.4435 |
| 150.7814 | 1135.692 | 1008.456 | 42584.14 | 505.8894 | 7187.725 | 923.5569 | 2404.004 | 200.667  | 316.4557 |
| 150.84   | 1135.713 | 1008.514 | 42586.74 | 505.8983 | 7187.86  | 923.5733 | 2404.28  | 200.6734 | 316.4621 |
| 150.9111 | 1135.743 | 1008.326 | 42589.89 | 505.9103 | 7188.031 | 923.595  | 2404.616 | 200.6756 | 316.4642 |
| 150.9835 | 1135.782 | 1007.709 | 42593.09 | 505.9244 | 7188.214 | 923.6205 | 2404.957 | 200.6685 | 316.4572 |
| 151.0433 | 1135.801 | 1007.855 | 42595.73 | 505.9331 | 7188.349 | 923.6364 | 2405.238 | 200.677  | 316.4656 |
| 151.0935 | 1135.808 | 1008.441 | 42597.94 | 505.9382 | 7188.451 | 923.6461 | 2405.474 | 200.6941 | 316.4826 |
| 151.1466 | 1135.824 | 1008.618 | 42600.28 | 505.9457 | 7188.569 | 923.6599 | 2405.723 | 200.7026 | 316.491  |
| 151.212  | 1135.849 | 1008.573 | 42603.16 | 505.9561 | 7188.722 | 923.6788 | 2406.03  | 200.7074 | 316.4957 |
| 151.2865 | 1135.885 | 1008.132 | 42606.43 | 505.9697 | 7188.905 | 923.7034 | 2406.379 | 200.7043 | 316.4927 |
| 151.3399 | 1135.897 | 1008.505 | 42608.77 | 505.9762 | 7189.018 | 923.7156 | 2406.629 | 200.7171 | 316.5054 |
| 151.3933 | 1135.913 | 1008.684 | 42611.11 | 505.9837 | 7189.137 | 923.7293 | 2406.879 | 200.7256 | 316.5138 |
| 151.4582 | 1135.938 | 1008.644 | 42613.95 | 505.9939 | 7189.287 | 923.7479 | 2407.182 | 200.7305 | 316.5186 |
| 151.5317 | 1135.973 | 1008.249 | 42617.17 | 506.0071 | 7189.466 | 923.7718 | 2407.526 | 200.7282 | 316.5164 |
| 151.5986 | 1136.006 | 1007.822 | 42620.09 | 506.0194 | 7189.63  | 923.7939 | 2407.838 | 200.7248 | 316.513  |
| 151.6527 | 1136.014 | 1008.38  | 42622.45 | 506.0251 | 7189.74  | 923.8048 | 2408.09  | 200.7416 | 316.5296 |
| 151.7029 | 1136.025 | 1008.739 | 42624.63 | 506.0312 | 7189.846 | 923.8162 | 2408.324 | 200.7538 | 316.5417 |
| 151.7615 | 1136.045 | 1008.797 | 42627.18 | 506.04   | 7189.979 | 923.8322 | 2408.596 | 200.7601 | 316.548  |
| 151.8327 | 1136.075 | 1008.608 | 42630.27 | 506.0518 | 7190.146 | 923.8536 | 2408.927 | 200.7622 | 316.55   |

|          |          |          |          |          |          |          |          |          |          |
|----------|----------|----------|----------|----------|----------|----------|----------|----------|----------|
| 151.9051 | 1136.114 | 1007.991 | 42633.42 | 506.0657 | 7190.326 | 923.8787 | 2409.263 | 200.755  | 316.5429 |
| 151.9649 | 1136.132 | 1008.136 | 42636.01 | 506.0742 | 7190.459 | 923.8943 | 2409.541 | 200.7633 | 316.5512 |
| 152.0151 | 1136.139 | 1008.722 | 42638.18 | 506.0792 | 7190.558 | 923.9037 | 2409.773 | 200.7804 | 316.5681 |
| 152.0681 | 1136.154 | 1008.898 | 42640.47 | 506.0865 | 7190.674 | 923.9172 | 2410.018 | 200.7888 | 316.5764 |
| 152.1336 | 1136.179 | 1008.853 | 42643.3  | 506.0967 | 7190.824 | 923.9358 | 2410.321 | 200.7934 | 316.581  |
| 152.2081 | 1136.215 | 1008.412 | 42646.51 | 506.1101 | 7191.004 | 923.9599 | 2410.666 | 200.7902 | 316.5779 |
| 152.2614 | 1136.226 | 1008.784 | 42648.81 | 506.1165 | 7191.115 | 923.9719 | 2410.912 | 200.8029 | 316.5904 |
| 152.3148 | 1136.242 | 1008.963 | 42651.1  | 506.1238 | 7191.231 | 923.9853 | 2411.158 | 200.8114 | 316.5988 |
| 152.3797 | 1136.266 | 1008.923 | 42653.89 | 506.1338 | 7191.379 | 924.0036 | 2411.457 | 200.8161 | 316.6035 |
| 152.4532 | 1136.3   | 1008.527 | 42657.05 | 506.1468 | 7191.555 | 924.0271 | 2411.796 | 200.8137 | 316.6011 |
| 152.5201 | 1136.333 | 1008.1   | 42659.92 | 506.1589 | 7191.716 | 924.0489 | 2412.103 | 200.8101 | 316.5976 |
| 152.5742 | 1136.341 | 1008.657 | 42662.23 | 506.1645 | 7191.824 | 924.0595 | 2412.352 | 200.8269 | 316.6142 |
| 152.6245 | 1136.352 | 1009.016 | 42664.38 | 506.1704 | 7191.928 | 924.0706 | 2412.582 | 200.839  | 316.6262 |
| 152.6831 | 1136.372 | 1009.074 | 42666.88 | 506.179  | 7192.058 | 924.0863 | 2412.851 | 200.8452 | 316.6324 |
| 152.7542 | 1136.401 | 1008.885 | 42669.91 | 506.1906 | 7192.222 | 924.1074 | 2413.177 | 200.8472 | 316.6343 |
| 152.8266 | 1136.439 | 1008.267 | 42673    | 506.2044 | 7192.4   | 924.1321 | 2413.509 | 200.8398 | 316.627  |
| 152.8864 | 1136.457 | 1008.411 | 42675.54 | 506.2127 | 7192.53  | 924.1474 | 2413.782 | 200.8481 | 316.6352 |
| 152.9366 | 1136.463 | 1008.997 | 42677.67 | 506.2175 | 7192.627 | 924.1566 | 2414.011 | 200.8651 | 316.652  |
| 152.9897 | 1136.479 | 1009.173 | 42679.92 | 506.2247 | 7192.741 | 924.1697 | 2414.253 | 200.8734 | 316.6603 |
| 153.0551 | 1136.503 | 1009.128 | 42682.7  | 506.2347 | 7192.888 | 924.188  | 2414.552 | 200.8779 | 316.6647 |
| 153.1296 | 1136.538 | 1008.686 | 42685.85 | 506.2479 | 7193.064 | 924.2118 | 2414.891 | 200.8746 | 316.6614 |
| 153.183  | 1136.549 | 1009.059 | 42688.11 | 506.2541 | 7193.174 | 924.2235 | 2415.134 | 200.8872 | 316.6739 |
| 153.2364 | 1136.565 | 1009.237 | 42690.36 | 506.2613 | 7193.288 | 924.2366 | 2415.377 | 200.8955 | 316.6822 |
| 153.3013 | 1136.588 | 1009.197 | 42693.1  | 506.2711 | 7193.432 | 924.2546 | 2415.672 | 200.9001 | 316.6868 |
| 153.3748 | 1136.622 | 1008.8   | 42696.19 | 506.2839 | 7193.605 | 924.2777 | 2416.006 | 200.8977 | 316.6843 |
| 153.4417 | 1136.654 | 1008.372 | 42699.01 | 506.2958 | 7193.764 | 924.2992 | 2416.309 | 200.894  | 316.6806 |
| 153.4958 | 1136.662 | 1008.93  | 42701.28 | 506.3013 | 7193.869 | 924.3095 | 2416.554 | 200.9106 | 316.6972 |
| 153.546  | 1136.672 | 1009.289 | 42703.38 | 506.3071 | 7193.971 | 924.3203 | 2416.781 | 200.9226 | 316.7091 |
| 153.6046 | 1136.692 | 1009.346 | 42705.84 | 506.3155 | 7194.098 | 924.3358 | 2417.046 | 200.9288 | 316.7151 |
| 153.6758 | 1136.721 | 1009.156 | 42708.82 | 506.3269 | 7194.26  | 924.3565 | 2417.367 | 200.9306 | 316.7169 |
| 153.7482 | 1136.758 | 1008.538 | 42711.85 | 506.3404 | 7194.435 | 924.3808 | 2417.694 | 200.9231 | 316.7096 |
| 153.808  | 1136.776 | 1008.682 | 42714.35 | 506.3486 | 7194.562 | 924.3958 | 2417.964 | 200.9312 | 316.7176 |
| 153.8582 | 1136.782 | 1009.268 | 42716.43 | 506.3533 | 7194.657 | 924.4048 | 2418.19  | 200.9482 | 316.7344 |
| 153.9112 | 1136.797 | 1009.444 | 42718.64 | 506.3603 | 7194.769 | 924.4176 | 2418.428 | 200.9564 | 316.7425 |

|          |          |          |          |          |          |          |          |          |          |
|----------|----------|----------|----------|----------|----------|----------|----------|----------|----------|
| 153.9767 | 1136.821 | 1009.398 | 42721.37 | 506.3701 | 7194.913 | 924.4356 | 2418.723 | 200.9608 | 316.7469 |
| 154.0512 | 1136.855 | 1008.956 | 42724.46 | 506.3831 | 7195.087 | 924.459  | 2419.057 | 200.9574 | 316.7435 |
| 154.1045 | 1136.866 | 1009.328 | 42726.68 | 506.3892 | 7195.194 | 924.4704 | 2419.297 | 200.9699 | 316.7559 |
| 154.1579 | 1136.881 | 1009.506 | 42728.89 | 506.3962 | 7195.306 | 924.4833 | 2419.536 | 200.9782 | 316.7641 |
| 154.2228 | 1136.905 | 1009.465 | 42731.57 | 506.4059 | 7195.448 | 924.501  | 2419.827 | 200.9826 | 316.7685 |
| 154.2963 | 1136.938 | 1009.068 | 42734.62 | 506.4185 | 7195.618 | 924.5237 | 2420.156 | 200.98   | 316.766  |
| 154.3632 | 1136.97  | 1008.64  | 42737.38 | 506.4302 | 7195.774 | 924.5448 | 2420.455 | 200.9762 | 316.7622 |
| 154.4173 | 1136.977 | 1009.197 | 42739.61 | 506.4355 | 7195.877 | 924.5549 | 2420.696 | 200.9928 | 316.7786 |
| 154.4676 | 1136.987 | 1009.556 | 42741.67 | 506.4412 | 7195.976 | 924.5655 | 2420.92  | 201.0047 | 316.7904 |
| 154.5262 | 1137.006 | 1009.613 | 42744.08 | 506.4495 | 7196.102 | 924.5806 | 2421.182 | 201.0108 | 316.7964 |
| 154.5973 | 1137.034 | 1009.423 | 42747.01 | 506.4607 | 7196.26  | 924.6009 | 2421.498 | 201.0124 | 316.7981 |
| 154.6697 | 1137.072 | 1008.804 | 42749.98 | 506.474  | 7196.432 | 924.6249 | 2421.821 | 201.0049 | 316.7906 |
| 154.7295 | 1137.089 | 1008.948 | 42752.43 | 506.482  | 7196.557 | 924.6396 | 2422.086 | 201.0129 | 316.7985 |
| 154.7797 | 1137.095 | 1009.533 | 42754.48 | 506.4866 | 7196.65  | 924.6483 | 2422.309 | 201.0297 | 316.8152 |
| 154.8327 | 1137.109 | 1009.709 | 42756.65 | 506.4934 | 7196.76  | 924.661  | 2422.544 | 201.0379 | 316.8233 |
| 154.8982 | 1137.133 | 1009.663 | 42759.32 | 506.5031 | 7196.901 | 924.6786 | 2422.834 | 201.0422 | 316.8276 |
| 154.9727 | 1137.167 | 1009.22  | 42762.36 | 506.5159 | 7197.072 | 924.7017 | 2423.164 | 201.0386 | 316.824  |
| 155.0261 | 1137.178 | 1009.592 | 42764.53 | 506.5219 | 7197.177 | 924.7128 | 2423.4   | 201.051  | 316.8363 |
| 155.0795 | 1137.192 | 1009.77  | 42766.71 | 506.5287 | 7197.287 | 924.7254 | 2423.636 | 201.0592 | 316.8445 |
| 155.1444 | 1137.215 | 1009.729 | 42769.34 | 506.5382 | 7197.426 | 924.7428 | 2423.923 | 201.0636 | 316.8488 |
| 155.2179 | 1137.248 | 1009.331 | 42772.33 | 506.5506 | 7197.593 | 924.7651 | 2424.247 | 201.0609 | 316.8461 |
| 155.2848 | 1137.279 | 1008.903 | 42775.04 | 506.5621 | 7197.746 | 924.786  | 2424.542 | 201.0569 | 316.8422 |
| 155.3389 | 1137.286 | 1009.46  | 42777.23 | 506.5673 | 7197.847 | 924.7958 | 2424.78  | 201.0734 | 316.8586 |
| 155.3891 | 1137.296 | 1009.818 | 42779.25 | 506.5728 | 7197.945 | 924.8061 | 2425.001 | 201.0853 | 316.8703 |
| 155.4477 | 1137.315 | 1009.875 | 42781.62 | 506.581  | 7198.068 | 924.8209 | 2425.259 | 201.0912 | 316.8762 |
| 155.5189 | 1137.342 | 1009.685 | 42784.49 | 506.592  | 7198.223 | 924.8409 | 2425.571 | 201.0928 | 316.8777 |
| 155.5913 | 1137.379 | 1009.065 | 42787.41 | 506.6051 | 7198.392 | 924.8646 | 2425.889 | 201.0851 | 316.8701 |
| 155.6511 | 1137.397 | 1009.209 | 42789.82 | 506.613  | 7198.515 | 924.879  | 2426.151 | 201.093  | 316.878  |
| 155.7013 | 1137.402 | 1009.794 | 42791.83 | 506.6174 | 7198.606 | 924.8874 | 2426.37  | 201.1098 | 316.8946 |
| 155.7543 | 1137.416 | 1009.97  | 42793.95 | 506.6241 | 7198.714 | 924.8998 | 2426.602 | 201.1179 | 316.9026 |
| 155.8198 | 1137.439 | 1009.923 | 42796.58 | 506.6336 | 7198.853 | 924.9171 | 2426.888 | 201.1221 | 316.9068 |
| 155.8943 | 1137.473 | 1009.48  | 42799.56 | 506.6462 | 7199.021 | 924.9398 | 2427.213 | 201.1184 | 316.9031 |
| 155.9476 | 1137.483 | 1009.851 | 42801.69 | 506.652  | 7199.123 | 924.9507 | 2427.446 | 201.1307 | 316.9153 |
| 156.001  | 1137.497 | 1010.029 | 42803.82 | 506.6587 | 7199.231 | 924.9631 | 2427.679 | 201.1388 | 316.9234 |

|          |          |          |          |          |          |          |          |          |          |
|----------|----------|----------|----------|----------|----------|----------|----------|----------|----------|
| 156.0659 | 1137.52  | 1009.988 | 42806.41 | 506.6681 | 7199.368 | 924.9801 | 2427.961 | 201.1431 | 316.9276 |
| 156.1394 | 1137.552 | 1009.589 | 42809.34 | 506.6803 | 7199.532 | 925.0021 | 2428.281 | 201.1402 | 316.9248 |
| 156.2063 | 1137.583 | 1009.16  | 42812.01 | 506.6916 | 7199.683 | 925.0226 | 2428.571 | 201.1362 | 316.9208 |
| 156.2604 | 1137.59  | 1009.718 | 42814.15 | 506.6967 | 7199.781 | 925.0322 | 2428.806 | 201.1526 | 316.937  |
| 156.3107 | 1137.599 | 1010.076 | 42816.14 | 506.7021 | 7199.877 | 925.0422 | 2429.024 | 201.1644 | 316.9487 |
| 156.3693 | 1137.618 | 1010.132 | 42818.46 | 506.71   | 7199.998 | 925.0568 | 2429.278 | 201.1702 | 316.9545 |
| 156.4404 | 1137.645 | 1009.941 | 42821.28 | 506.7209 | 7200.151 | 925.0765 | 2429.586 | 201.1717 | 316.9559 |
| 156.5128 | 1137.681 | 1009.321 | 42824.15 | 506.7338 | 7200.317 | 925.0998 | 2429.899 | 201.1639 | 316.9482 |
| 156.5726 | 1137.698 | 1009.464 | 42826.51 | 506.7415 | 7200.437 | 925.1139 | 2430.157 | 201.1717 | 316.956  |
| 156.6228 | 1137.703 | 1010.05  | 42828.48 | 506.7458 | 7200.526 | 925.1221 | 2430.373 | 201.1884 | 316.9725 |
| 156.6758 | 1137.717 | 1010.225 | 42830.57 | 506.7524 | 7200.632 | 925.1342 | 2430.602 | 201.1964 | 316.9804 |
| 156.7413 | 1137.739 | 1010.178 | 42833.15 | 506.7617 | 7200.768 | 925.1512 | 2430.884 | 201.2005 | 316.9845 |
| 156.8158 | 1137.773 | 1009.735 | 42836.07 | 506.7741 | 7200.933 | 925.1736 | 2431.205 | 201.1967 | 316.9807 |
| 156.8692 | 1137.783 | 1010.106 | 42838.17 | 506.7798 | 7201.034 | 925.1842 | 2431.434 | 201.2089 | 316.9928 |
| 156.9226 | 1137.797 | 1010.283 | 42840.26 | 506.7864 | 7201.139 | 925.1963 | 2431.663 | 201.2169 | 317.0008 |
| 156.9875 | 1137.819 | 1010.242 | 42842.8  | 506.7955 | 7201.274 | 925.2131 | 2431.942 | 201.2211 | 317.0049 |
| 157.061  | 1137.851 | 1009.843 | 42845.67 | 506.8075 | 7201.435 | 925.2347 | 2432.257 | 201.2181 | 317.002  |
| 157.1279 | 1137.881 | 1009.414 | 42848.29 | 506.8187 | 7201.583 | 925.2549 | 2432.544 | 201.214  | 316.9979 |
| 157.182  | 1137.888 | 1009.97  | 42850.39 | 506.8236 | 7201.68  | 925.2642 | 2432.775 | 201.2303 | 317.014  |
| 157.2322 | 1137.897 | 1010.329 | 42852.35 | 506.8289 | 7201.774 | 925.274  | 2432.99  | 201.242  | 317.0256 |
| 157.2908 | 1137.915 | 1010.384 | 42854.63 | 506.8367 | 7201.892 | 925.2883 | 2433.24  | 201.2478 | 317.0313 |
| 157.362  | 1137.942 | 1010.193 | 42857.39 | 506.8474 | 7202.042 | 925.3077 | 2433.543 | 201.2491 | 317.0327 |
| 157.4344 | 1137.978 | 1009.572 | 42860.21 | 506.8601 | 7202.206 | 925.3306 | 2433.852 | 201.2412 | 317.0248 |
| 157.4942 | 1137.994 | 1009.716 | 42862.52 | 506.8677 | 7202.324 | 925.3445 | 2434.107 | 201.2489 | 317.0325 |
| 157.5444 | 1137.999 | 1010.301 | 42864.46 | 506.8718 | 7202.411 | 925.3525 | 2434.32  | 201.2655 | 317.0489 |
| 157.5974 | 1138.012 | 1010.476 | 42866.51 | 506.8783 | 7202.514 | 925.3643 | 2434.545 | 201.2734 | 317.0568 |
| 157.6629 | 1138.034 | 1010.429 | 42869.04 | 506.8874 | 7202.648 | 925.381  | 2434.823 | 201.2774 | 317.0607 |
| 157.7374 | 1138.067 | 1009.985 | 42871.91 | 506.8996 | 7202.811 | 925.403  | 2435.14  | 201.2735 | 317.0568 |
| 157.7907 | 1138.077 | 1010.356 | 42873.97 | 506.9052 | 7202.909 | 925.4134 | 2435.366 | 201.2857 | 317.0689 |
| 157.8441 | 1138.091 | 1010.533 | 42876.02 | 506.9116 | 7203.013 | 925.4253 | 2435.592 | 201.2936 | 317.0768 |
| 157.909  | 1138.112 | 1010.491 | 42878.51 | 506.9206 | 7203.145 | 925.4417 | 2435.866 | 201.2977 | 317.0808 |
| 157.9825 | 1138.144 | 1010.092 | 42881.33 | 506.9325 | 7203.303 | 925.463  | 2436.177 | 201.2946 | 317.0777 |
| 158.0494 | 1138.174 | 1009.662 | 42883.9  | 506.9435 | 7203.449 | 925.4829 | 2436.459 | 201.2903 | 317.0735 |
| 158.1035 | 1138.18  | 1010.219 | 42885.97 | 506.9483 | 7203.543 | 925.492  | 2436.687 | 201.3066 | 317.0896 |

|          |          |          |          |          |          |          |          |          |          |
|----------|----------|----------|----------|----------|----------|----------|----------|----------|----------|
| 158.1538 | 1138.189 | 1010.577 | 42887.88 | 506.9534 | 7203.635 | 925.5016 | 2436.899 | 201.3182 | 317.1011 |
| 158.2124 | 1138.207 | 1010.632 | 42890.12 | 506.9611 | 7203.752 | 925.5156 | 2437.146 | 201.3239 | 317.1068 |
| 158.2835 | 1138.233 | 1010.441 | 42892.84 | 506.9715 | 7203.899 | 925.5346 | 2437.445 | 201.3251 | 317.108  |
| 158.3559 | 1138.269 | 1009.819 | 42895.6  | 506.9841 | 7204.06  | 925.5572 | 2437.749 | 201.3171 | 317.1    |
| 158.4157 | 1138.285 | 1009.962 | 42897.87 | 506.9915 | 7204.176 | 925.5708 | 2438     | 201.3247 | 317.1076 |
| 158.4659 | 1138.289 | 1010.547 | 42899.77 | 506.9956 | 7204.261 | 925.5786 | 2438.211 | 201.3412 | 317.124  |
| 158.5189 | 1138.302 | 1010.722 | 42901.78 | 507.0019 | 7204.362 | 925.5902 | 2438.433 | 201.3491 | 317.1317 |
| 158.5844 | 1138.324 | 1010.675 | 42904.27 | 507.0109 | 7204.494 | 925.6066 | 2438.707 | 201.353  | 317.1356 |
| 158.6589 | 1138.356 | 1010.23  | 42907.09 | 507.0229 | 7204.653 | 925.6282 | 2439.019 | 201.3489 | 317.1316 |
| 158.7123 | 1138.366 | 1010.601 | 42909.1  | 507.0283 | 7204.75  | 925.6384 | 2439.241 | 201.361  | 317.1436 |
| 158.7657 | 1138.379 | 1010.778 | 42911.12 | 507.0346 | 7204.851 | 925.65   | 2439.464 | 201.3689 | 317.1514 |
| 158.8306 | 1138.4   | 1010.736 | 42913.56 | 507.0434 | 7204.981 | 925.6661 | 2439.735 | 201.3728 | 317.1553 |
| 158.9041 | 1138.432 | 1010.336 | 42916.34 | 507.0551 | 7205.137 | 925.6871 | 2440.041 | 201.3696 | 317.1521 |
| 158.971  | 1138.461 | 1009.906 | 42918.85 | 507.066  | 7205.28  | 925.7067 | 2440.32  | 201.3653 | 317.1478 |
| 159.0251 | 1138.467 | 1010.462 | 42920.88 | 507.0706 | 7205.373 | 925.7155 | 2440.544 | 201.3814 | 317.1638 |
| 159.0753 | 1138.476 | 1010.82  | 42922.76 | 507.0756 | 7205.463 | 925.7249 | 2440.753 | 201.393  | 317.1753 |
| 159.1339 | 1138.493 | 1010.875 | 42924.96 | 507.0831 | 7205.577 | 925.7387 | 2440.996 | 201.3986 | 317.1808 |
| 159.2051 | 1138.519 | 1010.683 | 42927.63 | 507.0934 | 7205.721 | 925.7573 | 2441.291 | 201.3997 | 317.1819 |
| 159.2775 | 1138.554 | 1010.061 | 42930.34 | 507.1058 | 7205.879 | 925.7797 | 2441.591 | 201.3915 | 317.1738 |
| 159.3373 | 1138.57  | 1010.204 | 42932.57 | 507.1131 | 7205.993 | 925.793  | 2441.839 | 201.3991 | 317.1813 |
| 159.3875 | 1138.574 | 1010.789 | 42934.43 | 507.117  | 7206.077 | 925.8005 | 2442.046 | 201.4156 | 317.1976 |
| 159.4405 | 1138.587 | 1010.964 | 42936.41 | 507.1232 | 7206.176 | 925.8119 | 2442.265 | 201.4233 | 317.2053 |
| 159.506  | 1138.608 | 1010.916 | 42938.84 | 507.132  | 7206.305 | 925.828  | 2442.535 | 201.4271 | 317.2091 |
| 159.5805 | 1138.64  | 1010.471 | 42941.61 | 507.1438 | 7206.462 | 925.8493 | 2442.842 | 201.4229 | 317.205  |
| 159.6338 | 1138.649 | 1010.842 | 42943.59 | 507.1491 | 7206.557 | 925.8592 | 2443.062 | 201.4349 | 317.2169 |
| 159.6872 | 1138.662 | 1011.018 | 42945.57 | 507.1553 | 7206.656 | 925.8706 | 2443.282 | 201.4427 | 317.2246 |
| 159.7521 | 1138.683 | 1010.976 | 42947.97 | 507.164  | 7206.784 | 925.8864 | 2443.548 | 201.4466 | 317.2284 |
| 159.8256 | 1138.714 | 1010.576 | 42950.69 | 507.1754 | 7206.937 | 925.9071 | 2443.85  | 201.4433 | 317.2251 |
| 159.8925 | 1138.743 | 1010.145 | 42953.16 | 507.1861 | 7207.077 | 925.9264 | 2444.125 | 201.4388 | 317.2207 |
| 159.9466 | 1138.749 | 1010.702 | 42955.15 | 507.1906 | 7207.168 | 925.9349 | 2444.346 | 201.4549 | 317.2367 |
| 159.9969 | 1138.757 | 1011.059 | 42957    | 507.1955 | 7207.256 | 925.9441 | 2444.552 | 201.4664 | 317.248  |
| 160.0555 | 1138.774 | 1011.114 | 42959.16 | 507.2029 | 7207.368 | 925.9576 | 2444.792 | 201.4719 | 317.2535 |
| 160.1266 | 1138.8   | 1010.922 | 42961.77 | 507.213  | 7207.51  | 925.976  | 2445.083 | 201.4729 | 317.2545 |
| 160.199  | 1138.834 | 1010.299 | 42964.43 | 507.2253 | 7207.666 | 925.998  | 2445.379 | 201.4646 | 317.2463 |

|          |          |          |          |          |          |          |          |          |          |
|----------|----------|----------|----------|----------|----------|----------|----------|----------|----------|
| 160.2588 | 1138.85  | 1010.442 | 42966.62 | 507.2324 | 7207.777 | 926.011  | 2445.622 | 201.4721 | 317.2537 |
| 160.309  | 1138.854 | 1011.027 | 42968.45 | 507.2362 | 7207.859 | 926.0183 | 2445.827 | 201.4885 | 317.2699 |
| 160.3621 | 1138.866 | 1011.201 | 42970.39 | 507.2422 | 7207.956 | 926.0295 | 2446.043 | 201.4962 | 317.2775 |
| 160.4275 | 1138.887 | 1011.153 | 42972.78 | 507.2509 | 7208.083 | 926.0453 | 2446.309 | 201.4999 | 317.2812 |
| 160.502  | 1138.919 | 1010.707 | 42975.5  | 507.2625 | 7208.237 | 926.0663 | 2446.612 | 201.4956 | 317.277  |
| 160.5554 | 1138.928 | 1011.078 | 42977.44 | 507.2677 | 7208.33  | 926.0759 | 2446.828 | 201.5075 | 317.2888 |
| 160.6088 | 1138.94  | 1011.254 | 42979.38 | 507.2738 | 7208.428 | 926.0871 | 2447.045 | 201.5152 | 317.2964 |
| 160.6737 | 1138.961 | 1011.212 | 42981.74 | 507.2823 | 7208.553 | 926.1027 | 2447.308 | 201.519  | 317.3002 |
| 160.7472 | 1138.991 | 1010.811 | 42984.41 | 507.2936 | 7208.703 | 926.123  | 2447.606 | 201.5156 | 317.2968 |
| 160.8141 | 1139.02  | 1010.38  | 42986.84 | 507.3041 | 7208.841 | 926.142  | 2447.876 | 201.511  | 317.2923 |
| 160.8682 | 1139.025 | 1010.936 | 42988.79 | 507.3085 | 7208.93  | 926.1503 | 2448.095 | 201.527  | 317.3081 |
| 160.9184 | 1139.033 | 1011.294 | 42990.6  | 507.3133 | 7209.017 | 926.1593 | 2448.297 | 201.5384 | 317.3194 |
| 160.977  | 1139.05  | 1011.348 | 42992.72 | 507.3205 | 7209.126 | 926.1725 | 2448.534 | 201.5439 | 317.3248 |
| 161.0482 | 1139.075 | 1011.156 | 42995.29 | 507.3304 | 7209.266 | 926.1906 | 2448.82  | 201.5448 | 317.3257 |
| 161.1206 | 1139.11  | 1010.533 | 42997.9  | 507.3425 | 7209.419 | 926.2123 | 2449.112 | 201.5364 | 317.3174 |
| 161.1804 | 1139.125 | 1010.675 | 43000.05 | 507.3495 | 7209.528 | 926.225  | 2449.352 | 201.5438 | 317.3247 |
| 161.2306 | 1139.128 | 1011.26  | 43001.85 | 507.3531 | 7209.608 | 926.2321 | 2449.554 | 201.5601 | 317.3409 |
| 161.2836 | 1139.14  | 1011.434 | 43003.75 | 507.3591 | 7209.704 | 926.243  | 2449.767 | 201.5677 | 317.3484 |
| 161.3491 | 1139.161 | 1011.385 | 43006.09 | 507.3676 | 7209.828 | 926.2586 | 2450.029 | 201.5713 | 317.352  |
| 161.4236 | 1139.192 | 1010.939 | 43008.76 | 507.3791 | 7209.98  | 926.2793 | 2450.328 | 201.5669 | 317.3477 |
| 161.4769 | 1139.201 | 1011.31  | 43010.67 | 507.3841 | 7210.071 | 926.2887 | 2450.541 | 201.5788 | 317.3594 |
| 161.5303 | 1139.213 | 1011.486 | 43012.57 | 507.39   | 7210.167 | 926.2996 | 2450.755 | 201.5864 | 317.367  |
| 161.5952 | 1139.233 | 1011.443 | 43014.89 | 507.3984 | 7210.289 | 926.3149 | 2451.014 | 201.5901 | 317.3706 |
| 161.6687 | 1139.263 | 1011.042 | 43017.51 | 507.4095 | 7210.437 | 926.3349 | 2451.307 | 201.5866 | 317.3671 |
| 161.7356 | 1139.292 | 1010.61  | 43019.89 | 507.4199 | 7210.573 | 926.3537 | 2451.574 | 201.5819 | 317.3625 |
| 161.7897 | 1139.297 | 1011.167 | 43021.81 | 507.4241 | 7210.66  | 926.3617 | 2451.789 | 201.5978 | 317.3783 |
| 161.84   | 1139.305 | 1011.524 | 43023.59 | 507.4288 | 7210.745 | 926.3704 | 2451.989 | 201.6092 | 317.3895 |
| 161.8986 | 1139.321 | 1011.578 | 43025.66 | 507.4359 | 7210.852 | 926.3834 | 2452.222 | 201.6145 | 317.3948 |
| 161.9697 | 1139.346 | 1011.385 | 43028.18 | 507.4457 | 7210.99  | 926.4012 | 2452.505 | 201.6153 | 317.3956 |
| 162.0421 | 1139.38  | 1010.762 | 43030.75 | 507.4576 | 7211.14  | 926.4226 | 2452.792 | 201.6068 | 317.3872 |
| 162.1019 | 1139.394 | 1010.904 | 43032.86 | 507.4644 | 7211.247 | 926.4351 | 2453.029 | 201.6141 | 317.3945 |
| 162.1521 | 1139.398 | 1011.489 | 43034.62 | 507.468  | 7211.325 | 926.442  | 2453.228 | 201.6304 | 317.4106 |
| 162.2052 | 1139.41  | 1011.663 | 43036.49 | 507.4738 | 7211.419 | 926.4527 | 2453.437 | 201.6379 | 317.418  |
| 162.2706 | 1139.43  | 1011.614 | 43038.79 | 507.4821 | 7211.541 | 926.4679 | 2453.696 | 201.6414 | 317.4215 |

|          |          |          |          |          |          |          |          |          |          |
|----------|----------|----------|----------|----------|----------|----------|----------|----------|----------|
| 162.3451 | 1139.461 | 1011.167 | 43041.41 | 507.4935 | 7211.69  | 926.4883 | 2453.99  | 201.6369 | 317.417  |
| 162.3985 | 1139.469 | 1011.538 | 43043.28 | 507.4984 | 7211.779 | 926.4975 | 2454.201 | 201.6487 | 317.4287 |
| 162.4519 | 1139.481 | 1011.713 | 43045.15 | 507.5042 | 7211.873 | 926.5082 | 2454.411 | 201.6563 | 317.4362 |
| 162.5168 | 1139.501 | 1011.67  | 43047.42 | 507.5124 | 7211.994 | 926.5232 | 2454.667 | 201.6598 | 317.4398 |
| 162.5903 | 1139.53  | 1011.269 | 43049.99 | 507.5233 | 7212.139 | 926.5429 | 2454.956 | 201.6562 | 317.4362 |
| 162.6572 | 1139.559 | 1010.837 | 43052.33 | 507.5336 | 7212.273 | 926.5614 | 2455.219 | 201.6515 | 317.4315 |
| 162.7113 | 1139.563 | 1011.393 | 43054.21 | 507.5377 | 7212.358 | 926.5692 | 2455.431 | 201.6673 | 317.4472 |
| 162.7615 | 1139.571 | 1011.75  | 43055.96 | 507.5422 | 7212.441 | 926.5777 | 2455.628 | 201.6786 | 317.4583 |
| 162.8202 | 1139.587 | 1011.804 | 43058    | 507.5492 | 7212.546 | 926.5905 | 2455.858 | 201.6838 | 317.4635 |
| 162.8913 | 1139.611 | 1011.611 | 43060.47 | 507.5588 | 7212.681 | 926.6079 | 2456.136 | 201.6845 | 317.4643 |
| 162.9637 | 1139.645 | 1010.987 | 43062.99 | 507.5706 | 7212.829 | 926.629  | 2456.42  | 201.676  | 317.4557 |
| 163.0235 | 1139.659 | 1011.129 | 43065.06 | 507.5772 | 7212.934 | 926.6413 | 2456.653 | 201.6832 | 317.4629 |
| 163.0737 | 1139.662 | 1011.713 | 43066.79 | 507.5807 | 7213.011 | 926.648  | 2456.849 | 201.6994 | 317.4789 |
| 163.1267 | 1139.674 | 1011.887 | 43068.62 | 507.5864 | 7213.103 | 926.6584 | 2457.056 | 201.7068 | 317.4863 |
| 163.1922 | 1139.694 | 1011.838 | 43070.88 | 507.5946 | 7213.223 | 926.6734 | 2457.311 | 201.7102 | 317.4897 |
| 163.2667 | 1139.724 | 1011.391 | 43073.46 | 507.6057 | 7213.369 | 926.6935 | 2457.601 | 201.7056 | 317.4851 |
| 163.3201 | 1139.732 | 1011.761 | 43075.29 | 507.6105 | 7213.456 | 926.7025 | 2457.809 | 201.7173 | 317.4968 |
| 163.3734 | 1139.744 | 1011.937 | 43077.13 | 507.6162 | 7213.549 | 926.713  | 2458.016 | 201.7248 | 317.5042 |
| 163.4383 | 1139.763 | 1011.893 | 43079.36 | 507.6243 | 7213.667 | 926.7277 | 2458.268 | 201.7283 | 317.5076 |
| 163.5118 | 1139.793 | 1011.491 | 43081.88 | 507.635  | 7213.81  | 926.7471 | 2458.553 | 201.7246 | 317.5039 |
| 163.5787 | 1139.82  | 1011.059 | 43084.17 | 507.6451 | 7213.941 | 926.7653 | 2458.812 | 201.7197 | 317.4991 |
| 163.6328 | 1139.825 | 1011.615 | 43086.02 | 507.6491 | 7214.024 | 926.7729 | 2459.021 | 201.7355 | 317.5148 |
| 163.6831 | 1139.832 | 1011.972 | 43087.74 | 507.6535 | 7214.105 | 926.7812 | 2459.215 | 201.7467 | 317.5259 |
| 163.7417 | 1139.848 | 1012.026 | 43089.74 | 507.6604 | 7214.209 | 926.7937 | 2459.442 | 201.7519 | 317.531  |
| 163.8128 | 1139.872 | 1011.832 | 43092.16 | 507.6698 | 7214.342 | 926.8109 | 2459.716 | 201.7525 | 317.5316 |
| 163.8852 | 1139.905 | 1011.208 | 43094.63 | 507.6814 | 7214.487 | 926.8317 | 2459.996 | 201.7438 | 317.523  |
| 163.9451 | 1139.919 | 1011.349 | 43096.67 | 507.688  | 7214.59  | 926.8437 | 2460.226 | 201.7509 | 317.5301 |
| 163.9952 | 1139.922 | 1011.934 | 43098.37 | 507.6913 | 7214.665 | 926.8501 | 2460.419 | 201.7671 | 317.546  |
| 164.0483 | 1139.933 | 1012.107 | 43100.16 | 507.6969 | 7214.755 | 926.8604 | 2460.623 | 201.7744 | 317.5533 |
| 164.1137 | 1139.953 | 1012.058 | 43102.38 | 507.7049 | 7214.873 | 926.8751 | 2460.874 | 201.7778 | 317.5567 |
| 164.1882 | 1139.983 | 1011.61  | 43104.91 | 507.7159 | 7215.017 | 926.8949 | 2461.16  | 201.7731 | 317.552  |
| 164.2416 | 1139.99  | 1011.98  | 43106.71 | 507.7206 | 7215.103 | 926.9036 | 2461.365 | 201.7847 | 317.5635 |
| 164.295  | 1140.002 | 1012.156 | 43108.51 | 507.7261 | 7215.193 | 926.9139 | 2461.569 | 201.7921 | 317.5709 |
| 164.3599 | 1140.021 | 1012.112 | 43110.7  | 507.7341 | 7215.309 | 926.9284 | 2461.817 | 201.7955 | 317.5742 |

|          |          |          |          |          |          |          |          |          |          |
|----------|----------|----------|----------|----------|----------|----------|----------|----------|----------|
| 164.4334 | 1140.05  | 1011.71  | 43113.18 | 507.7447 | 7215.449 | 926.9475 | 2462.098 | 201.7917 | 317.5705 |
| 164.5003 | 1140.077 | 1011.277 | 43115.43 | 507.7546 | 7215.579 | 926.9654 | 2462.354 | 201.7867 | 317.5656 |
| 164.5544 | 1140.081 | 1011.833 | 43117.24 | 507.7585 | 7215.66  | 926.9728 | 2462.56  | 201.8025 | 317.5811 |
| 164.6046 | 1140.088 | 1012.19  | 43118.92 | 507.7628 | 7215.74  | 926.9809 | 2462.751 | 201.8136 | 317.5922 |
| 164.6633 | 1140.104 | 1012.243 | 43120.89 | 507.7695 | 7215.841 | 926.9932 | 2462.975 | 201.8187 | 317.5972 |
| 164.7344 | 1140.128 | 1012.049 | 43123.27 | 507.7788 | 7215.972 | 927.0101 | 2463.245 | 201.8192 | 317.5977 |
| 164.8068 | 1140.16  | 1011.424 | 43125.7  | 507.7903 | 7216.115 | 927.0306 | 2463.521 | 201.8104 | 317.589  |
| 164.8666 | 1140.174 | 1011.566 | 43127.69 | 507.7967 | 7216.216 | 927.0423 | 2463.748 | 201.8175 | 317.596  |
| 164.9168 | 1140.176 | 1012.15  | 43129.36 | 507.7999 | 7216.289 | 927.0486 | 2463.938 | 201.8335 | 317.6119 |
| 164.9698 | 1140.188 | 1012.323 | 43131.12 | 507.8053 | 7216.378 | 927.0586 | 2464.139 | 201.8408 | 317.6191 |
| 165.0353 | 1140.207 | 1012.273 | 43133.3  | 507.8133 | 7216.493 | 927.0731 | 2464.387 | 201.8441 | 317.6224 |
| 165.1098 | 1140.237 | 1011.826 | 43135.78 | 507.8241 | 7216.635 | 927.0926 | 2464.668 | 201.8392 | 317.6176 |
| 165.1632 | 1140.244 | 1012.196 | 43137.55 | 507.8286 | 7216.718 | 927.1011 | 2464.87  | 201.8508 | 317.6291 |
| 165.2165 | 1140.255 | 1012.371 | 43139.31 | 507.8341 | 7216.807 | 927.1112 | 2465.071 | 201.8582 | 317.6363 |
| 165.2814 | 1140.274 | 1012.327 | 43141.46 | 507.8419 | 7216.921 | 927.1254 | 2465.316 | 201.8615 | 317.6396 |
| 165.355  | 1140.302 | 1011.924 | 43143.9  | 507.8523 | 7217.059 | 927.1442 | 2465.593 | 201.8576 | 317.6357 |
| 165.4218 | 1140.33  | 1011.491 | 43146.11 | 507.8621 | 7217.186 | 927.1618 | 2465.845 | 201.8525 | 317.6307 |
| 165.4759 | 1140.333 | 1012.047 | 43147.89 | 507.8659 | 7217.266 | 927.169  | 2466.048 | 201.8682 | 317.6463 |
| 165.5262 | 1140.34  | 1012.403 | 43149.54 | 507.8701 | 7217.344 | 927.1769 | 2466.237 | 201.8792 | 317.6572 |
| 165.5848 | 1140.355 | 1012.457 | 43151.47 | 507.8766 | 7217.444 | 927.189  | 2466.457 | 201.8842 | 317.6622 |
| 165.6559 | 1140.379 | 1012.262 | 43153.8  | 507.8858 | 7217.571 | 927.2056 | 2466.724 | 201.8847 | 317.6626 |
| 165.7283 | 1140.411 | 1011.637 | 43156.18 | 507.8971 | 7217.712 | 927.2258 | 2466.995 | 201.8758 | 317.6538 |
| 165.7882 | 1140.425 | 1011.778 | 43158.14 | 507.9034 | 7217.811 | 927.2373 | 2467.219 | 201.8828 | 317.6607 |
| 165.8383 | 1140.427 | 1012.362 | 43159.78 | 507.9065 | 7217.883 | 927.2434 | 2467.406 | 201.8987 | 317.6766 |
| 165.8914 | 1140.438 | 1012.536 | 43161.51 | 507.9118 | 7217.97  | 927.2532 | 2467.604 | 201.906  | 317.6837 |
| 165.9568 | 1140.456 | 1012.485 | 43163.65 | 507.9196 | 7218.083 | 927.2674 | 2467.849 | 201.9091 | 317.6869 |
| 166.0313 | 1140.486 | 1012.037 | 43166.08 | 507.9302 | 7218.222 | 927.2866 | 2468.126 | 201.9042 | 317.682  |
| 166.0847 | 1140.493 | 1012.407 | 43167.82 | 507.9347 | 7218.304 | 927.2949 | 2468.325 | 201.9157 | 317.6934 |
| 166.1381 | 1140.504 | 1012.582 | 43169.55 | 507.94   | 7218.391 | 927.3048 | 2468.524 | 201.923  | 317.7006 |
| 166.203  | 1140.522 | 1012.538 | 43171.66 | 507.9477 | 7218.503 | 927.3187 | 2468.765 | 201.9262 | 317.7038 |
| 166.2765 | 1140.55  | 1012.134 | 43174.05 | 507.958  | 7218.639 | 927.3373 | 2469.038 | 201.9222 | 317.6998 |
| 166.3434 | 1140.577 | 1011.701 | 43176.22 | 507.9676 | 7218.764 | 927.3546 | 2469.286 | 201.9171 | 317.6947 |
| 166.3975 | 1140.581 | 1012.256 | 43177.96 | 507.9712 | 7218.842 | 927.3616 | 2469.487 | 201.9327 | 317.7102 |
| 166.4477 | 1140.587 | 1012.613 | 43179.58 | 507.9753 | 7218.918 | 927.3693 | 2469.673 | 201.9437 | 317.7211 |



|          |          |          |          |          |          |          |          |          |          |
|----------|----------|----------|----------|----------|----------|----------|----------|----------|----------|
| 166.5064 | 1140.602 | 1012.666 | 43181.48 | 507.9818 | 7219.016 | 927.3811 | 2469.89  | 201.9486 | 317.726  |
| 166.5775 | 1140.625 | 1012.471 | 43183.77 | 507.9908 | 7219.142 | 927.3975 | 2470.152 | 201.9489 | 317.7263 |
| 166.6499 | 1140.657 | 1011.846 | 43186.11 | 508.0019 | 7219.28  | 927.4174 | 2470.42  | 201.9399 | 317.7174 |
| 166.7097 | 1140.67  | 1011.987 | 43188.03 | 508.0081 | 7219.378 | 927.4287 | 2470.641 | 201.9468 | 317.7242 |
| 166.7599 | 1140.672 | 1012.571 | 43189.64 | 508.0111 | 7219.447 | 927.4346 | 2470.825 | 201.9628 | 317.74   |
| 166.8129 | 1140.683 | 1012.744 | 43191.34 | 508.0163 | 7219.532 | 927.4442 | 2471.02  | 201.9699 | 317.7471 |
| 166.8784 | 1140.701 | 1012.693 | 43193.43 | 508.0239 | 7219.644 | 927.4581 | 2471.261 | 201.973  | 317.7502 |
| 166.9529 | 1140.73  | 1012.245 | 43195.82 | 508.0344 | 7219.781 | 927.477  | 2471.535 | 201.968  | 317.7452 |
| 167.0063 | 1140.737 | 1012.614 | 43197.53 | 508.0388 | 7219.861 | 927.4852 | 2471.731 | 201.9794 | 317.7565 |
| 167.0597 | 1140.748 | 1012.789 | 43199.23 | 508.044  | 7219.946 | 927.4948 | 2471.927 | 201.9866 | 317.7637 |
| 167.1245 | 1140.766 | 1012.745 | 43201.3  | 508.0515 | 7220.056 | 927.5085 | 2472.165 | 201.9898 | 317.7668 |
| 167.1981 | 1140.794 | 1012.341 | 43203.64 | 508.0616 | 7220.189 | 927.5268 | 2472.434 | 201.9857 | 317.7627 |
| 167.2649 | 1140.82  | 1011.907 | 43205.77 | 508.0712 | 7220.312 | 927.5439 | 2472.678 | 201.9805 | 317.7576 |
| 167.319  | 1140.823 | 1012.463 | 43207.48 | 508.0747 | 7220.388 | 927.5507 | 2472.876 | 201.996  | 317.7729 |
| 167.3693 | 1140.83  | 1012.819 | 43209.08 | 508.0787 | 7220.463 | 927.5582 | 2473.059 | 202.0069 | 317.7838 |
| 167.4279 | 1140.844 | 1012.872 | 43210.93 | 508.085  | 7220.56  | 927.5698 | 2473.273 | 202.0118 | 317.7886 |
| 167.4991 | 1140.867 | 1012.677 | 43213.19 | 508.0939 | 7220.683 | 927.5858 | 2473.532 | 202.012  | 317.7888 |
| 167.5714 | 1140.899 | 1012.051 | 43215.48 | 508.1048 | 7220.819 | 927.6055 | 2473.796 | 202.0029 | 317.7798 |
| 167.6313 | 1140.911 | 1012.191 | 43217.37 | 508.1109 | 7220.915 | 927.6166 | 2474.013 | 202.0097 | 317.7866 |
| 167.6814 | 1140.913 | 1012.775 | 43218.94 | 508.1138 | 7220.983 | 927.6222 | 2474.195 | 202.0256 | 317.8023 |
| 167.7345 | 1140.923 | 1012.948 | 43220.61 | 508.1189 | 7221.066 | 927.6317 | 2474.388 | 202.0327 | 317.8093 |
| 167.7999 | 1140.942 | 1012.897 | 43222.67 | 508.1264 | 7221.176 | 927.6454 | 2474.625 | 202.0357 | 317.8123 |
| 167.8744 | 1140.97  | 1012.448 | 43225.01 | 508.1367 | 7221.31  | 927.664  | 2474.895 | 202.0306 | 317.8072 |
| 167.9278 | 1140.977 | 1012.818 | 43226.69 | 508.1409 | 7221.389 | 927.6719 | 2475.088 | 202.042  | 317.8185 |
| 167.9812 | 1140.987 | 1012.993 | 43228.36 | 508.146  | 7221.473 | 927.6813 | 2475.281 | 202.0491 | 317.8256 |
| 168.0461 | 1141.005 | 1012.948 | 43230.39 | 508.1534 | 7221.58  | 927.6948 | 2475.515 | 202.0522 | 317.8286 |
| 168.1196 | 1141.033 | 1012.544 | 43232.69 | 508.1634 | 7221.712 | 927.7128 | 2475.781 | 202.048  | 317.8245 |
| 168.1865 | 1141.059 | 1012.109 | 43234.78 | 508.1728 | 7221.832 | 927.7297 | 2476.022 | 202.0427 | 317.8192 |
| 168.2406 | 1141.062 | 1012.665 | 43236.46 | 508.1762 | 7221.907 | 927.7362 | 2476.216 | 202.0581 | 317.8345 |
| 168.2908 | 1141.068 | 1013.021 | 43238.02 | 508.1801 | 7221.98  | 927.7435 | 2476.397 | 202.069  | 317.8453 |
| 168.3495 | 1141.082 | 1013.074 | 43239.85 | 508.1863 | 7222.075 | 927.7549 | 2476.608 | 202.0738 | 317.85   |
| 168.4206 | 1141.104 | 1012.878 | 43242.06 | 508.195  | 7222.196 | 927.7707 | 2476.863 | 202.0739 | 317.8502 |
| 168.493  | 1141.136 | 1012.252 | 43244.31 | 508.2058 | 7222.33  | 927.7901 | 2477.123 | 202.0647 | 317.8411 |
| 168.5528 | 1141.148 | 1012.392 | 43246.16 | 508.2117 | 7222.424 | 927.801  | 2477.338 | 202.0715 | 317.8478 |

|          |          |          |          |          |          |          |          |          |          |
|----------|----------|----------|----------|----------|----------|----------|----------|----------|----------|
| 168.603  | 1141.15  | 1012.976 | 43247.71 | 508.2145 | 7222.49  | 927.8064 | 2477.517 | 202.0873 | 317.8634 |
| 168.656  | 1141.16  | 1013.149 | 43249.35 | 508.2195 | 7222.572 | 927.8157 | 2477.707 | 202.0943 | 317.8704 |
| 168.7215 | 1141.178 | 1013.098 | 43251.37 | 508.2269 | 7222.68  | 927.8291 | 2477.941 | 202.0972 | 317.8733 |
| 168.796  | 1141.206 | 1012.648 | 43253.67 | 508.2371 | 7222.812 | 927.8474 | 2478.207 | 202.092  | 317.8681 |
| 168.8494 | 1141.212 | 1013.018 | 43255.31 | 508.2412 | 7222.889 | 927.8552 | 2478.397 | 202.1033 | 317.8794 |
| 168.9028 | 1141.222 | 1013.192 | 43256.95 | 508.2462 | 7222.971 | 927.8644 | 2478.587 | 202.1104 | 317.8864 |
| 168.9677 | 1141.24  | 1013.147 | 43258.94 | 508.2535 | 7223.077 | 927.8777 | 2478.818 | 202.1134 | 317.8893 |
| 169.0412 | 1141.267 | 1012.742 | 43261.2  | 508.2633 | 7223.206 | 927.8954 | 2479.08  | 202.1091 | 317.885  |
| 169.108  | 1141.293 | 1012.308 | 43263.25 | 508.2726 | 7223.324 | 927.912  | 2479.317 | 202.1037 | 317.8797 |
| 169.1621 | 1141.296 | 1012.863 | 43264.9  | 508.2759 | 7223.397 | 927.9183 | 2479.509 | 202.1191 | 317.895  |
| 169.2124 | 1141.301 | 1013.219 | 43266.44 | 508.2796 | 7223.469 | 927.9255 | 2479.687 | 202.1299 | 317.9057 |
| 169.271  | 1141.315 | 1013.272 | 43268.23 | 508.2857 | 7223.562 | 927.9366 | 2479.895 | 202.1346 | 317.9103 |
| 169.3422 | 1141.337 | 1013.076 | 43270.4  | 508.2943 | 7223.681 | 927.9522 | 2480.147 | 202.1347 | 317.9104 |
| 169.4146 | 1141.368 | 1012.449 | 43272.6  | 508.305  | 7223.812 | 927.9713 | 2480.403 | 202.1254 | 317.9012 |
| 169.4744 | 1141.381 | 1012.589 | 43274.42 | 508.3108 | 7223.905 | 927.9819 | 2480.614 | 202.1321 | 317.9078 |
| 169.5245 | 1141.382 | 1013.173 | 43275.94 | 508.3135 | 7223.97  | 927.9872 | 2480.791 | 202.1478 | 317.9235 |
| 169.5776 | 1141.392 | 1013.346 | 43277.55 | 508.3184 | 7224.05  | 927.9963 | 2480.978 | 202.1548 | 317.9304 |
| 169.6431 | 1141.409 | 1013.294 | 43279.53 | 508.3256 | 7224.156 | 928.0095 | 2481.209 | 202.1576 | 317.9332 |
| 169.7175 | 1141.437 | 1012.845 | 43281.79 | 508.3357 | 7224.286 | 928.0275 | 2481.471 | 202.1523 | 317.9279 |
| 169.7709 | 1141.443 | 1013.214 | 43283.4  | 508.3397 | 7224.361 | 928.0351 | 2481.658 | 202.1636 | 317.9391 |
| 169.8243 | 1141.453 | 1013.388 | 43285.01 | 508.3446 | 7224.441 | 928.0441 | 2481.846 | 202.1706 | 317.946  |
| 169.8892 | 1141.471 | 1013.343 | 43286.97 | 508.3517 | 7224.545 | 928.0571 | 2482.074 | 202.1735 | 317.9489 |
| 169.9627 | 1141.497 | 1012.938 | 43289.18 | 508.3614 | 7224.672 | 928.0746 | 2482.331 | 202.1691 | 317.9445 |
| 170.0296 | 1141.523 | 1012.503 | 43291.2  | 508.3705 | 7224.789 | 928.0909 | 2482.566 | 202.1636 | 317.9391 |
| 170.0837 | 1141.525 | 1013.058 | 43292.82 | 508.3737 | 7224.86  | 928.0971 | 2482.755 | 202.179  | 317.9543 |
| 170.1339 | 1141.531 | 1013.414 | 43294.32 | 508.3774 | 7224.93  | 928.1041 | 2482.93  | 202.1897 | 317.965  |
| 170.1926 | 1141.544 | 1013.466 | 43296.08 | 508.3833 | 7225.021 | 928.115  | 2483.135 | 202.1943 | 317.9696 |
| 170.2637 | 1141.566 | 1013.27  | 43298.21 | 508.3918 | 7225.138 | 928.1303 | 2483.383 | 202.1943 | 317.9695 |
| 170.3361 | 1141.597 | 1012.643 | 43300.38 | 508.4023 | 7225.268 | 928.1491 | 2483.636 | 202.185  | 317.9603 |
| 170.3959 | 1141.609 | 1012.783 | 43302.16 | 508.408  | 7225.358 | 928.1596 | 2483.844 | 202.1916 | 317.9668 |
| 170.4461 | 1141.61  | 1013.367 | 43303.65 | 508.4106 | 7225.422 | 928.1647 | 2484.018 | 202.2073 | 317.9824 |
| 170.4991 | 1141.619 | 1013.539 | 43305.23 | 508.4154 | 7225.501 | 928.1735 | 2484.202 | 202.2142 | 317.9892 |
| 170.5646 | 1141.637 | 1013.487 | 43307.18 | 508.4225 | 7225.604 | 928.1865 | 2484.43  | 202.2169 | 317.9919 |
| 170.6391 | 1141.664 | 1013.037 | 43309.39 | 508.4324 | 7225.732 | 928.2043 | 2484.688 | 202.2115 | 317.9866 |

|          |          |          |          |          |          |          |          |          |          |
|----------|----------|----------|----------|----------|----------|----------|----------|----------|----------|
| 170.6925 | 1141.67  | 1013.406 | 43310.98 | 508.4363 | 7225.806 | 928.2117 | 2484.873 | 202.2227 | 317.9977 |
| 170.7459 | 1141.68  | 1013.58  | 43312.56 | 508.4411 | 7225.885 | 928.2205 | 2485.058 | 202.2297 | 318.0046 |
| 170.8108 | 1141.697 | 1013.535 | 43314.48 | 508.4481 | 7225.987 | 928.2333 | 2485.282 | 202.2325 | 318.0074 |
| 170.8843 | 1141.723 | 1013.129 | 43316.65 | 508.4576 | 7226.111 | 928.2505 | 2485.536 | 202.228  | 318.0029 |
| 170.9512 | 1141.748 | 1012.694 | 43318.63 | 508.4666 | 7226.226 | 928.2666 | 2485.767 | 202.2225 | 317.9974 |
| 171.0053 | 1141.75  | 1013.249 | 43320.22 | 508.4697 | 7226.296 | 928.2726 | 2485.954 | 202.2377 | 318.0125 |
| 171.0555 | 1141.756 | 1013.605 | 43321.7  | 508.4733 | 7226.365 | 928.2794 | 2486.127 | 202.2484 | 318.0231 |
| 171.1141 | 1141.769 | 1013.657 | 43323.42 | 508.4791 | 7226.454 | 928.2901 | 2486.328 | 202.253  | 318.0277 |
| 171.1853 | 1141.79  | 1013.461 | 43325.51 | 508.4874 | 7226.569 | 928.3051 | 2486.573 | 202.2529 | 318.0276 |
| 171.2577 | 1141.821 | 1012.833 | 43327.64 | 508.4978 | 7226.696 | 928.3237 | 2486.822 | 202.2434 | 318.0182 |
| 171.3175 | 1141.833 | 1012.973 | 43329.39 | 508.5034 | 7226.785 | 928.3339 | 2487.027 | 202.25   | 318.0247 |
| 171.3677 | 1141.833 | 1013.557 | 43330.85 | 508.5059 | 7226.847 | 928.3389 | 2487.199 | 202.2656 | 318.0402 |
| 171.4207 | 1141.843 | 1013.729 | 43332.4  | 508.5106 | 7226.924 | 928.3475 | 2487.381 | 202.2724 | 318.0469 |
| 171.4862 | 1141.86  | 1013.677 | 43334.31 | 508.5176 | 7227.026 | 928.3603 | 2487.605 | 202.2751 | 318.0496 |
| 171.5607 | 1141.887 | 1013.226 | 43336.49 | 508.5273 | 7227.152 | 928.3778 | 2487.859 | 202.2696 | 318.0442 |
| 171.614  | 1141.893 | 1013.595 | 43338.04 | 508.5311 | 7227.224 | 928.385  | 2488.042 | 202.2808 | 318.0552 |
| 171.6674 | 1141.902 | 1013.769 | 43339.59 | 508.5358 | 7227.301 | 928.3937 | 2488.224 | 202.2876 | 318.062  |
| 171.7323 | 1141.919 | 1013.723 | 43341.48 | 508.5427 | 7227.402 | 928.4062 | 2488.445 | 202.2904 | 318.0647 |
| 171.8058 | 1141.945 | 1013.318 | 43343.61 | 508.5521 | 7227.524 | 928.4231 | 2488.695 | 202.2858 | 318.0602 |
| 171.8727 | 1141.97  | 1012.882 | 43345.55 | 508.5609 | 7227.637 | 928.439  | 2488.923 | 202.2802 | 318.0546 |
| 171.9268 | 1141.972 | 1013.437 | 43347.11 | 508.5639 | 7227.705 | 928.4448 | 2489.107 | 202.2954 | 318.0697 |
| 171.9771 | 1141.977 | 1013.793 | 43348.56 | 508.5674 | 7227.773 | 928.4514 | 2489.277 | 202.306  | 318.0802 |
| 172.0357 | 1141.99  | 1013.845 | 43350.26 | 508.5732 | 7227.86  | 928.4619 | 2489.476 | 202.3105 | 318.0847 |
| 172.1068 | 1142.011 | 1013.648 | 43352.31 | 508.5813 | 7227.973 | 928.4767 | 2489.717 | 202.3103 | 318.0845 |
| 172.1792 | 1142.041 | 1013.02  | 43354.4  | 508.5916 | 7228.099 | 928.4951 | 2489.962 | 202.3008 | 318.0751 |
| 172.239  | 1142.052 | 1013.159 | 43356.12 | 508.597  | 7228.186 | 928.5051 | 2490.165 | 202.3073 | 318.0815 |
| 172.2892 | 1142.053 | 1013.743 | 43357.55 | 508.5994 | 7228.246 | 928.5098 | 2490.334 | 202.3228 | 318.0969 |
| 172.3423 | 1142.062 | 1013.915 | 43359.07 | 508.604  | 7228.322 | 928.5183 | 2490.513 | 202.3296 | 318.1036 |
| 172.4077 | 1142.079 | 1013.863 | 43360.95 | 508.6109 | 7228.422 | 928.5308 | 2490.734 | 202.3322 | 318.1062 |
| 172.4822 | 1142.106 | 1013.412 | 43363.08 | 508.6205 | 7228.546 | 928.5481 | 2490.985 | 202.3267 | 318.1007 |
| 172.5356 | 1142.111 | 1013.781 | 43364.61 | 508.6242 | 7228.616 | 928.5551 | 2491.165 | 202.3377 | 318.1117 |
| 172.589  | 1142.12  | 1013.955 | 43366.13 | 508.6288 | 7228.692 | 928.5636 | 2491.344 | 202.3445 | 318.1184 |
| 172.6539 | 1142.137 | 1013.908 | 43367.98 | 508.6355 | 7228.791 | 928.5759 | 2491.562 | 202.3472 | 318.1211 |
| 172.7274 | 1142.162 | 1013.502 | 43370.07 | 508.6448 | 7228.911 | 928.5926 | 2491.809 | 202.3426 | 318.1165 |

|          |          |          |          |          |          |          |          |          |          |
|----------|----------|----------|----------|----------|----------|----------|----------|----------|----------|
| 172.7943 | 1142.187 | 1013.066 | 43371.98 | 508.6535 | 7229.022 | 928.6083 | 2492.033 | 202.3369 | 318.1108 |
| 172.8484 | 1142.189 | 1013.621 | 43373.51 | 508.6564 | 7229.089 | 928.6139 | 2492.214 | 202.352  | 318.1258 |
| 172.8986 | 1142.193 | 1013.977 | 43374.93 | 508.6598 | 7229.155 | 928.6203 | 2492.382 | 202.3626 | 318.1363 |
| 172.9573 | 1142.206 | 1014.028 | 43376.59 | 508.6654 | 7229.241 | 928.6306 | 2492.578 | 202.367  | 318.1407 |
| 173.0284 | 1142.227 | 1013.832 | 43378.61 | 508.6735 | 7229.351 | 928.6451 | 2492.816 | 202.3667 | 318.1404 |
| 173.1008 | 1142.257 | 1013.203 | 43380.66 | 508.6836 | 7229.475 | 928.6633 | 2493.058 | 202.3571 | 318.1309 |
| 173.1606 | 1142.268 | 1013.342 | 43382.35 | 508.6889 | 7229.56  | 928.6731 | 2493.257 | 202.3635 | 318.1372 |
| 173.2108 | 1142.268 | 1013.926 | 43383.76 | 508.6912 | 7229.62  | 928.6777 | 2493.424 | 202.379  | 318.1526 |
| 173.2638 | 1142.277 | 1014.098 | 43385.25 | 508.6957 | 7229.694 | 928.686  | 2493.6   | 202.3858 | 318.1593 |
| 173.3293 | 1142.294 | 1014.045 | 43387.09 | 508.7025 | 7229.792 | 928.6983 | 2493.818 | 202.3883 | 318.1618 |
| 173.4038 | 1142.32  | 1013.594 | 43389.19 | 508.712  | 7229.913 | 928.7153 | 2494.066 | 202.3826 | 318.1562 |
| 173.4572 | 1142.325 | 1013.963 | 43390.68 | 508.7156 | 7229.983 | 928.7221 | 2494.243 | 202.3936 | 318.1671 |
| 173.5105 | 1142.334 | 1014.136 | 43392.17 | 508.72   | 7230.057 | 928.7304 | 2494.42  | 202.4004 | 318.1738 |
| 173.5754 | 1142.351 | 1014.09  | 43393.99 | 508.7267 | 7230.154 | 928.7425 | 2494.634 | 202.403  | 318.1764 |
| 173.649  | 1142.376 | 1013.684 | 43396.05 | 508.7358 | 7230.272 | 928.7589 | 2494.878 | 202.3983 | 318.1717 |
| 173.7158 | 1142.4   | 1013.247 | 43397.92 | 508.7444 | 7230.381 | 928.7744 | 2495.099 | 202.3925 | 318.1659 |
| 173.7699 | 1142.402 | 1013.802 | 43399.42 | 508.7472 | 7230.447 | 928.7798 | 2495.277 | 202.4076 | 318.1809 |
| 173.8202 | 1142.406 | 1014.158 | 43400.82 | 508.7505 | 7230.511 | 928.786  | 2495.443 | 202.4181 | 318.1913 |
| 173.8788 | 1142.419 | 1014.209 | 43402.45 | 508.756  | 7230.595 | 928.7962 | 2495.636 | 202.4225 | 318.1956 |
| 173.9499 | 1142.439 | 1014.012 | 43404.42 | 508.7639 | 7230.704 | 928.8105 | 2495.87  | 202.4221 | 318.1953 |
| 174.0223 | 1142.469 | 1013.383 | 43406.44 | 508.7739 | 7230.826 | 928.8283 | 2496.109 | 202.4124 | 318.1857 |
| 174.0822 | 1142.48  | 1013.522 | 43408.09 | 508.7791 | 7230.91  | 928.838  | 2496.305 | 202.4187 | 318.192  |
| 174.1323 | 1142.48  | 1014.105 | 43409.48 | 508.7814 | 7230.968 | 928.8424 | 2496.47  | 202.4342 | 318.2073 |
| 174.1854 | 1142.489 | 1014.277 | 43410.94 | 508.7858 | 7231.04  | 928.8505 | 2496.643 | 202.4409 | 318.2139 |
| 174.2508 | 1142.505 | 1014.224 | 43412.75 | 508.7924 | 7231.137 | 928.8626 | 2496.858 | 202.4433 | 318.2163 |
| 174.3253 | 1142.531 | 1013.773 | 43414.81 | 508.8017 | 7231.256 | 928.8794 | 2497.102 | 202.4376 | 318.2106 |
| 174.3787 | 1142.536 | 1014.141 | 43416.27 | 508.8052 | 7231.324 | 928.886  | 2497.276 | 202.4485 | 318.2215 |
| 174.4321 | 1142.545 | 1014.315 | 43417.74 | 508.8096 | 7231.397 | 928.8941 | 2497.451 | 202.4552 | 318.2281 |
| 174.497  | 1142.561 | 1014.268 | 43419.52 | 508.8161 | 7231.492 | 928.906  | 2497.663 | 202.4578 | 318.2306 |
| 174.5705 | 1142.586 | 1013.862 | 43421.54 | 508.8251 | 7231.608 | 928.9222 | 2497.902 | 202.4529 | 318.2258 |
| 174.6374 | 1142.61  | 1013.425 | 43423.38 | 508.8336 | 7231.716 | 928.9374 | 2498.12  | 202.4471 | 318.22   |
| 174.6915 | 1142.611 | 1013.98  | 43424.85 | 508.8363 | 7231.779 | 928.9426 | 2498.296 | 202.4621 | 318.2349 |
| 174.7417 | 1142.615 | 1014.335 | 43426.22 | 508.8395 | 7231.842 | 928.9487 | 2498.459 | 202.4726 | 318.2453 |
| 174.8004 | 1142.628 | 1014.386 | 43427.82 | 508.8449 | 7231.925 | 928.9587 | 2498.65  | 202.4769 | 318.2496 |

|          |          |          |          |          |          |          |          |          |          |
|----------|----------|----------|----------|----------|----------|----------|----------|----------|----------|
| 174.8715 | 1142.648 | 1014.189 | 43429.76 | 508.8527 | 7232.032 | 928.9727 | 2498.881 | 202.4764 | 318.2491 |
| 174.9439 | 1142.677 | 1013.559 | 43431.74 | 508.8626 | 7232.152 | 928.9904 | 2499.115 | 202.4667 | 318.2395 |
| 175.0037 | 1142.688 | 1013.698 | 43433.36 | 508.8677 | 7232.234 | 928.9998 | 2499.309 | 202.4729 | 318.2457 |
| 175.0539 | 1142.687 | 1014.282 | 43434.72 | 508.8698 | 7232.291 | 929.004  | 2499.471 | 202.4883 | 318.2609 |
| 175.1069 | 1142.696 | 1014.453 | 43436.16 | 508.8741 | 7232.362 | 929.012  | 2499.643 | 202.4949 | 318.2675 |
| 175.1724 | 1142.712 | 1014.4   | 43437.93 | 508.8806 | 7232.457 | 929.0239 | 2499.854 | 202.4973 | 318.2699 |
| 175.2469 | 1142.738 | 1013.948 | 43439.95 | 508.8898 | 7232.574 | 929.0404 | 2500.094 | 202.4915 | 318.2641 |
| 175.3003 | 1142.742 | 1014.317 | 43441.39 | 508.8933 | 7232.641 | 929.0469 | 2500.266 | 202.5024 | 318.2749 |
| 175.3537 | 1142.751 | 1014.49  | 43442.83 | 508.8975 | 7232.712 | 929.0548 | 2500.438 | 202.509  | 318.2815 |
| 175.4186 | 1142.767 | 1014.443 | 43444.58 | 508.9039 | 7232.805 | 929.0665 | 2500.647 | 202.5115 | 318.2839 |
| 175.4921 | 1142.791 | 1014.036 | 43446.56 | 508.9128 | 7232.92  | 929.0824 | 2500.883 | 202.5066 | 318.279  |
| 175.5589 | 1142.815 | 1013.599 | 43448.37 | 508.9212 | 7233.025 | 929.0974 | 2501.098 | 202.5007 | 318.2732 |
| 175.613  | 1142.816 | 1014.154 | 43449.81 | 508.9238 | 7233.088 | 929.1025 | 2501.271 | 202.5156 | 318.288  |
| 175.6633 | 1142.82  | 1014.509 | 43451.16 | 508.9269 | 7233.149 | 929.1084 | 2501.432 | 202.526  | 318.2983 |
| 175.7219 | 1142.832 | 1014.56  | 43452.73 | 508.9322 | 7233.231 | 929.1182 | 2501.62  | 202.5303 | 318.3025 |
| 175.7931 | 1142.852 | 1014.362 | 43454.63 | 508.9399 | 7233.336 | 929.132  | 2501.848 | 202.5298 | 318.302  |
| 175.8654 | 1142.881 | 1013.733 | 43456.57 | 508.9496 | 7233.453 | 929.1494 | 2502.079 | 202.5199 | 318.2922 |
| 175.9253 | 1142.892 | 1013.871 | 43458.17 | 508.9546 | 7233.534 | 929.1587 | 2502.27  | 202.5261 | 318.2984 |
| 175.9754 | 1142.891 | 1014.455 | 43459.5  | 508.9567 | 7233.589 | 929.1627 | 2502.43  | 202.5415 | 318.3136 |
| 176.0285 | 1142.9   | 1014.626 | 43460.91 | 508.9609 | 7233.659 | 929.1705 | 2502.599 | 202.548  | 318.3201 |
| 176.094  | 1142.915 | 1014.573 | 43462.65 | 508.9673 | 7233.752 | 929.1822 | 2502.807 | 202.5503 | 318.3224 |
| 176.1684 | 1142.941 | 1014.121 | 43464.64 | 508.9763 | 7233.868 | 929.1985 | 2503.044 | 202.5444 | 318.3165 |
| 176.2218 | 1142.945 | 1014.489 | 43466.05 | 508.9796 | 7233.933 | 929.2048 | 2503.213 | 202.5553 | 318.3273 |
| 176.2752 | 1142.954 | 1014.662 | 43467.46 | 508.9839 | 7234.003 | 929.2125 | 2503.383 | 202.5619 | 318.3338 |
| 176.3401 | 1142.969 | 1014.615 | 43469.18 | 508.9901 | 7234.094 | 929.224  | 2503.588 | 202.5643 | 318.3362 |
| 176.4136 | 1142.993 | 1014.208 | 43471.13 | 508.9989 | 7234.207 | 929.2397 | 2503.821 | 202.5593 | 318.3312 |
| 176.4805 | 1143.017 | 1013.77  | 43472.89 | 509.0071 | 7234.311 | 929.2545 | 2504.033 | 202.5533 | 318.3253 |
| 176.5346 | 1143.018 | 1014.325 | 43474.31 | 509.0096 | 7234.372 | 929.2594 | 2504.204 | 202.5682 | 318.3401 |
| 176.5848 | 1143.022 | 1014.68  | 43475.63 | 509.0127 | 7234.432 | 929.2652 | 2504.362 | 202.5785 | 318.3503 |
| 176.6435 | 1143.033 | 1014.731 | 43477.18 | 509.0179 | 7234.512 | 929.2747 | 2504.547 | 202.5827 | 318.3545 |
| 176.7146 | 1143.053 | 1014.533 | 43479.05 | 509.0254 | 7234.615 | 929.2884 | 2504.772 | 202.5821 | 318.3539 |
| 176.787  | 1143.082 | 1013.903 | 43480.95 | 509.035  | 7234.731 | 929.3055 | 2505     | 202.5722 | 318.3441 |
| 176.8468 | 1143.092 | 1014.041 | 43482.52 | 509.0399 | 7234.81  | 929.3146 | 2505.188 | 202.5783 | 318.3501 |
| 176.897  | 1143.091 | 1014.625 | 43483.82 | 509.0419 | 7234.864 | 929.3185 | 2505.345 | 202.5936 | 318.3653 |

|          |          |          |          |          |          |          |          |          |          |
|----------|----------|----------|----------|----------|----------|----------|----------|----------|----------|
| 176.95   | 1143.099 | 1014.796 | 43485.21 | 509.046  | 7234.933 | 929.3261 | 2505.512 | 202.6001 | 318.3717 |
| 177.0155 | 1143.115 | 1014.742 | 43486.92 | 509.0523 | 7235.024 | 929.3376 | 2505.717 | 202.6024 | 318.374  |
| 177.09   | 1143.14  | 1014.29  | 43488.86 | 509.0612 | 7235.137 | 929.3536 | 2505.951 | 202.5964 | 318.368  |
| 177.1434 | 1143.144 | 1014.658 | 43490.25 | 509.0645 | 7235.201 | 929.3597 | 2506.118 | 202.6072 | 318.3787 |
| 177.1968 | 1143.152 | 1014.831 | 43491.64 | 509.0686 | 7235.27  | 929.3674 | 2506.285 | 202.6137 | 318.3852 |
| 177.2617 | 1143.167 | 1014.783 | 43493.32 | 509.0747 | 7235.36  | 929.3786 | 2506.487 | 202.616  | 318.3875 |
| 177.3352 | 1143.192 | 1014.376 | 43495.23 | 509.0834 | 7235.47  | 929.3941 | 2506.717 | 202.611  | 318.3825 |
| 177.4021 | 1143.215 | 1013.938 | 43496.97 | 509.0915 | 7235.572 | 929.4087 | 2506.926 | 202.6049 | 318.3765 |
| 177.4562 | 1143.215 | 1014.493 | 43498.36 | 509.0939 | 7235.632 | 929.4134 | 2507.094 | 202.6197 | 318.3912 |
| 177.5064 | 1143.219 | 1014.848 | 43499.66 | 509.0969 | 7235.691 | 929.419  | 2507.25  | 202.6301 | 318.4014 |
| 177.565  | 1143.231 | 1014.898 | 43501.17 | 509.102  | 7235.77  | 929.4284 | 2507.433 | 202.6342 | 318.4055 |
| 177.6362 | 1143.25  | 1014.7   | 43503.01 | 509.1094 | 7235.871 | 929.4418 | 2507.654 | 202.6335 | 318.4048 |
| 177.7086 | 1143.278 | 1014.07  | 43504.87 | 509.1189 | 7235.985 | 929.4588 | 2507.878 | 202.6235 | 318.3949 |
| 177.7684 | 1143.288 | 1014.208 | 43506.41 | 509.1237 | 7236.062 | 929.4676 | 2508.064 | 202.6296 | 318.4009 |
| 177.8186 | 1143.288 | 1014.791 | 43507.7  | 509.1255 | 7236.115 | 929.4714 | 2508.219 | 202.6448 | 318.4161 |
| 177.8716 | 1143.295 | 1014.962 | 43509.05 | 509.1296 | 7236.182 | 929.4788 | 2508.383 | 202.6513 | 318.4224 |
| 177.9371 | 1143.311 | 1014.909 | 43510.73 | 509.1357 | 7236.272 | 929.4901 | 2508.586 | 202.6534 | 318.4246 |
| 178.0116 | 1143.336 | 1014.456 | 43512.64 | 509.1446 | 7236.384 | 929.5059 | 2508.816 | 202.6474 | 318.4186 |
| 178.0649 | 1143.34  | 1014.824 | 43514    | 509.1477 | 7236.446 | 929.5119 | 2508.98  | 202.6581 | 318.4292 |
| 178.1183 | 1143.348 | 1014.997 | 43515.36 | 509.1517 | 7236.513 | 929.5193 | 2509.145 | 202.6646 | 318.4356 |
| 178.1832 | 1143.362 | 1014.949 | 43517.02 | 509.1578 | 7236.602 | 929.5304 | 2509.345 | 202.6668 | 318.4379 |
| 178.2567 | 1143.386 | 1014.541 | 43518.89 | 509.1663 | 7236.71  | 929.5456 | 2509.571 | 202.6617 | 318.4328 |
| 178.3236 | 1143.409 | 1014.103 | 43520.6  | 509.1743 | 7236.811 | 929.56   | 2509.777 | 202.6556 | 318.4267 |
| 178.3777 | 1143.41  | 1014.658 | 43521.97 | 509.1766 | 7236.869 | 929.5646 | 2509.942 | 202.6704 | 318.4414 |
| 178.428  | 1143.413 | 1015.012 | 43523.24 | 509.1795 | 7236.927 | 929.5701 | 2510.096 | 202.6806 | 318.4515 |
| 178.4866 | 1143.425 | 1015.063 | 43524.72 | 509.1845 | 7237.004 | 929.5793 | 2510.276 | 202.6847 | 318.4556 |
| 178.5577 | 1143.444 | 1014.864 | 43526.52 | 509.1918 | 7237.104 | 929.5924 | 2510.494 | 202.6839 | 318.4548 |
| 178.6301 | 1143.471 | 1014.233 | 43528.36 | 509.2012 | 7237.216 | 929.6092 | 2510.716 | 202.6739 | 318.4448 |
| 178.6899 | 1143.481 | 1014.372 | 43529.87 | 509.2059 | 7237.292 | 929.6178 | 2510.898 | 202.6799 | 318.4508 |
| 178.7401 | 1143.48  | 1014.955 | 43531.13 | 509.2076 | 7237.343 | 929.6215 | 2511.051 | 202.6951 | 318.4659 |
| 178.7932 | 1143.488 | 1015.126 | 43532.46 | 509.2116 | 7237.409 | 929.6287 | 2511.213 | 202.7015 | 318.4722 |
| 178.8586 | 1143.503 | 1015.072 | 43534.11 | 509.2176 | 7237.497 | 929.6398 | 2511.412 | 202.7036 | 318.4743 |
| 178.9331 | 1143.528 | 1014.619 | 43535.98 | 509.2263 | 7237.607 | 929.6554 | 2511.639 | 202.6974 | 318.4682 |
| 178.9865 | 1143.531 | 1014.987 | 43537.32 | 509.2294 | 7237.668 | 929.6612 | 2511.801 | 202.7081 | 318.4788 |

|          |          |          |          |          |          |          |          |          |          |
|----------|----------|----------|----------|----------|----------|----------|----------|----------|----------|
| 179.0399 | 1143.539 | 1015.159 | 43538.65 | 509.2333 | 7237.734 | 929.6685 | 2511.964 | 202.7145 | 318.4851 |
| 179.1048 | 1143.554 | 1015.111 | 43540.28 | 509.2393 | 7237.821 | 929.6793 | 2512.161 | 202.7167 | 318.4873 |
| 179.1783 | 1143.577 | 1014.703 | 43542.12 | 509.2477 | 7237.928 | 929.6944 | 2512.384 | 202.7115 | 318.4821 |
| 179.2452 | 1143.6   | 1014.265 | 43543.79 | 509.2556 | 7238.027 | 929.7086 | 2512.586 | 202.7053 | 318.476  |
| 179.2993 | 1143.6   | 1014.819 | 43545.13 | 509.2578 | 7238.083 | 929.713  | 2512.75  | 202.72   | 318.4906 |
| 179.3495 | 1143.603 | 1015.174 | 43546.38 | 509.2606 | 7238.14  | 929.7183 | 2512.901 | 202.7303 | 318.5007 |
| 179.4082 | 1143.615 | 1015.224 | 43547.84 | 509.2655 | 7238.216 | 929.7273 | 2513.079 | 202.7343 | 318.5047 |
| 179.4793 | 1143.633 | 1015.025 | 43549.61 | 509.2727 | 7238.314 | 929.7403 | 2513.293 | 202.7334 | 318.5039 |
| 179.5517 | 1143.661 | 1014.394 | 43551.41 | 509.2819 | 7238.424 | 929.7568 | 2513.512 | 202.7233 | 318.4938 |
| 179.6115 | 1143.671 | 1014.532 | 43552.89 | 509.2865 | 7238.498 | 929.7653 | 2513.692 | 202.7292 | 318.4997 |
| 179.6617 | 1143.669 | 1015.115 | 43554.13 | 509.2882 | 7238.549 | 929.7687 | 2513.842 | 202.7444 | 318.5148 |
| 179.7147 | 1143.677 | 1015.286 | 43555.43 | 509.2921 | 7238.613 | 929.7759 | 2514.002 | 202.7507 | 318.521  |
| 179.7802 | 1143.692 | 1015.232 | 43557.05 | 509.298  | 7238.7   | 929.7867 | 2514.198 | 202.7528 | 318.5231 |
| 179.8547 | 1143.716 | 1014.779 | 43558.89 | 509.3066 | 7238.808 | 929.8021 | 2514.422 | 202.7466 | 318.5169 |
| 179.9081 | 1143.72  | 1015.146 | 43560.2  | 509.3096 | 7238.868 | 929.8078 | 2514.582 | 202.7572 | 318.5274 |
| 179.9615 | 1143.727 | 1015.319 | 43561.51 | 509.3134 | 7238.932 | 929.8149 | 2514.742 | 202.7636 | 318.5337 |
| 180.0263 | 1143.741 | 1015.271 | 43563.11 | 509.3193 | 7239.017 | 929.8256 | 2514.936 | 202.7657 | 318.5359 |
| 180.0999 | 1143.765 | 1014.862 | 43564.91 | 509.3275 | 7239.122 | 929.8404 | 2515.155 | 202.7604 | 318.5306 |
| 180.1667 | 1143.787 | 1014.424 | 43566.55 | 509.3354 | 7239.22  | 929.8544 | 2515.355 | 202.7541 | 318.5244 |
| 180.2208 | 1143.787 | 1014.978 | 43567.87 | 509.3375 | 7239.275 | 929.8586 | 2515.516 | 202.7688 | 318.5389 |
| 180.2711 | 1143.79  | 1015.333 | 43569.1  | 509.3402 | 7239.331 | 929.8638 | 2515.666 | 202.779  | 318.549  |
| 180.3297 | 1143.801 | 1015.383 | 43570.53 | 509.345  | 7239.405 | 929.8726 | 2515.84  | 202.7829 | 318.5529 |
| 180.4008 | 1143.82  | 1015.184 | 43572.27 | 509.3521 | 7239.501 | 929.8854 | 2516.052 | 202.782  | 318.5521 |
| 180.4732 | 1143.847 | 1014.552 | 43574.03 | 509.3612 | 7239.61  | 929.9017 | 2516.267 | 202.7718 | 318.5419 |
| 180.5331 | 1143.857 | 1014.69  | 43575.49 | 509.3657 | 7239.683 | 929.91   | 2516.445 | 202.7777 | 318.5478 |
| 180.5832 | 1143.855 | 1015.273 | 43576.7  | 509.3673 | 7239.732 | 929.9133 | 2516.593 | 202.7928 | 318.5627 |
| 180.6363 | 1143.862 | 1015.444 | 43577.98 | 509.3711 | 7239.795 | 929.9203 | 2516.75  | 202.7991 | 318.569  |
| 180.7017 | 1143.877 | 1015.389 | 43579.57 | 509.377  | 7239.88  | 929.931  | 2516.944 | 202.8011 | 318.5709 |
| 180.7762 | 1143.901 | 1014.936 | 43581.38 | 509.3854 | 7239.986 | 929.9461 | 2517.164 | 202.7948 | 318.5647 |
| 180.8296 | 1143.904 | 1015.303 | 43582.66 | 509.3883 | 7240.045 | 929.9516 | 2517.322 | 202.8054 | 318.5752 |
| 180.883  | 1143.912 | 1015.476 | 43583.95 | 509.3921 | 7240.108 | 929.9586 | 2517.479 | 202.8117 | 318.5814 |
| 180.9479 | 1143.926 | 1015.427 | 43585.52 | 509.3978 | 7240.192 | 929.9691 | 2517.671 | 202.8138 | 318.5835 |
| 181.0214 | 1143.949 | 1015.018 | 43587.29 | 509.406  | 7240.295 | 929.9837 | 2517.887 | 202.8084 | 318.5782 |
| 181.0883 | 1143.971 | 1014.58  | 43588.9  | 509.4137 | 7240.391 | 929.9975 | 2518.084 | 202.802  | 318.5719 |

|          |          |          |          |          |          |          |          |          |          |
|----------|----------|----------|----------|----------|----------|----------|----------|----------|----------|
| 181.1424 | 1143.971 | 1015.134 | 43590.19 | 509.4157 | 7240.445 | 930.0016 | 2518.243 | 202.8167 | 318.5864 |
| 181.1926 | 1143.974 | 1015.488 | 43591.4  | 509.4183 | 7240.5   | 930.0066 | 2518.39  | 202.8268 | 318.5964 |
| 181.2513 | 1143.984 | 1015.538 | 43592.8  | 509.4231 | 7240.572 | 930.0153 | 2518.562 | 202.8307 | 318.6003 |
| 181.3224 | 1144.003 | 1015.339 | 43594.5  | 509.43   | 7240.667 | 930.0278 | 2518.771 | 202.8297 | 318.5993 |
| 181.3948 | 1144.03  | 1014.707 | 43596.24 | 509.439  | 7240.774 | 930.0439 | 2518.983 | 202.8194 | 318.5891 |
| 181.4546 | 1144.039 | 1014.845 | 43597.66 | 509.4434 | 7240.845 | 930.0521 | 2519.158 | 202.8253 | 318.5949 |
| 181.5048 | 1144.037 | 1015.428 | 43598.86 | 509.445  | 7240.893 | 930.0552 | 2519.304 | 202.8403 | 318.6098 |
| 181.5578 | 1144.044 | 1015.598 | 43600.12 | 509.4487 | 7240.955 | 930.0621 | 2519.459 | 202.8466 | 318.616  |
| 181.6233 | 1144.059 | 1015.544 | 43601.67 | 509.4544 | 7241.039 | 930.0725 | 2519.65  | 202.8485 | 318.6179 |
| 181.6978 | 1144.082 | 1015.09  | 43603.45 | 509.4628 | 7241.143 | 930.0875 | 2519.867 | 202.8421 | 318.6116 |
| 181.7512 | 1144.086 | 1015.457 | 43604.71 | 509.4656 | 7241.201 | 930.0928 | 2520.022 | 202.8526 | 318.622  |
| 181.8046 | 1144.093 | 1015.629 | 43605.97 | 509.4692 | 7241.263 | 930.0996 | 2520.178 | 202.8589 | 318.6283 |
| 181.8695 | 1144.107 | 1015.581 | 43607.51 | 509.4749 | 7241.345 | 930.1099 | 2520.366 | 202.8609 | 318.6302 |
| 181.943  | 1144.129 | 1015.172 | 43609.25 | 509.4829 | 7241.446 | 930.1243 | 2520.58  | 202.8555 | 318.6248 |
| 182.0098 | 1144.151 | 1014.733 | 43610.83 | 509.4905 | 7241.541 | 930.138  | 2520.774 | 202.8491 | 318.6185 |
| 182.0639 | 1144.151 | 1015.287 | 43612.1  | 509.4925 | 7241.594 | 930.1419 | 2520.93  | 202.8637 | 318.633  |
| 182.1142 | 1144.154 | 1015.641 | 43613.28 | 509.495  | 7241.647 | 930.1467 | 2521.075 | 202.8737 | 318.6429 |
| 182.1728 | 1144.164 | 1015.691 | 43614.66 | 509.4997 | 7241.718 | 930.1553 | 2521.245 | 202.8776 | 318.6467 |
| 182.244  | 1144.182 | 1015.491 | 43616.33 | 509.5065 | 7241.811 | 930.1676 | 2521.45  | 202.8765 | 318.6457 |
| 182.3164 | 1144.209 | 1014.859 | 43618.03 | 509.5154 | 7241.916 | 930.1835 | 2521.659 | 202.8662 | 318.6354 |
| 182.3762 | 1144.218 | 1014.997 | 43619.43 | 509.5197 | 7241.986 | 930.1915 | 2521.832 | 202.872  | 318.6412 |
| 182.4264 | 1144.216 | 1015.58  | 43620.6  | 509.5212 | 7242.033 | 930.1945 | 2521.976 | 202.887  | 318.6561 |
| 182.4794 | 1144.223 | 1015.75  | 43621.84 | 509.5248 | 7242.094 | 930.2012 | 2522.129 | 202.8932 | 318.6622 |
| 182.5449 | 1144.237 | 1015.695 | 43623.37 | 509.5304 | 7242.176 | 930.2115 | 2522.317 | 202.895  | 318.664  |
| 182.6194 | 1144.261 | 1015.241 | 43625.11 | 509.5387 | 7242.279 | 930.2262 | 2522.531 | 202.8886 | 318.6577 |
| 182.6727 | 1144.264 | 1015.608 | 43626.35 | 509.5414 | 7242.335 | 930.2314 | 2522.684 | 202.8991 | 318.668  |
| 182.7261 | 1144.271 | 1015.78  | 43627.59 | 509.545  | 7242.396 | 930.2381 | 2522.837 | 202.9053 | 318.6742 |
| 182.791  | 1144.284 | 1015.732 | 43629.1  | 509.5505 | 7242.476 | 930.2482 | 2523.022 | 202.9072 | 318.6761 |
| 182.8645 | 1144.307 | 1015.322 | 43630.81 | 509.5585 | 7242.576 | 930.2624 | 2523.233 | 202.9017 | 318.6707 |
| 182.9314 | 1144.328 | 1014.883 | 43632.36 | 509.566  | 7242.669 | 930.2758 | 2523.424 | 202.8952 | 318.6642 |
| 182.9855 | 1144.328 | 1015.437 | 43633.6  | 509.5678 | 7242.721 | 930.2796 | 2523.578 | 202.9098 | 318.6787 |
| 183.0358 | 1144.33  | 1015.791 | 43634.76 | 509.5703 | 7242.773 | 930.2843 | 2523.721 | 202.9198 | 318.6886 |
| 183.0944 | 1144.341 | 1015.841 | 43636.12 | 509.5749 | 7242.843 | 930.2927 | 2523.888 | 202.9236 | 318.6923 |
| 183.1655 | 1144.358 | 1015.641 | 43637.76 | 509.5816 | 7242.934 | 930.3048 | 2524.091 | 202.9225 | 318.6913 |



|          |          |          |          |          |          |          |          |          |          |
|----------|----------|----------|----------|----------|----------|----------|----------|----------|----------|
| 183.2379 | 1144.385 | 1015.008 | 43639.43 | 509.5904 | 7243.038 | 930.3205 | 2524.297 | 202.9121 | 318.6809 |
| 183.2977 | 1144.394 | 1015.146 | 43640.8  | 509.5946 | 7243.106 | 930.3283 | 2524.467 | 202.9178 | 318.6866 |
| 183.3479 | 1144.392 | 1015.729 | 43641.95 | 509.596  | 7243.152 | 930.3312 | 2524.609 | 202.9328 | 318.7014 |
| 183.401  | 1144.399 | 1015.899 | 43643.16 | 509.5995 | 7243.212 | 930.3378 | 2524.759 | 202.9389 | 318.7075 |
| 183.4664 | 1144.412 | 1015.844 | 43644.66 | 509.6051 | 7243.292 | 930.3479 | 2524.945 | 202.9407 | 318.7093 |
| 183.5409 | 1144.436 | 1015.389 | 43646.37 | 509.6132 | 7243.393 | 930.3624 | 2525.156 | 202.9342 | 318.7029 |
| 183.5943 | 1144.438 | 1015.756 | 43647.59 | 509.6158 | 7243.448 | 930.3674 | 2525.306 | 202.9446 | 318.7132 |
| 183.6477 | 1144.445 | 1015.928 | 43648.81 | 509.6193 | 7243.508 | 930.374  | 2525.457 | 202.9508 | 318.7193 |
| 183.7126 | 1144.458 | 1015.879 | 43650.29 | 509.6248 | 7243.587 | 930.3839 | 2525.64  | 202.9527 | 318.7212 |
| 183.7861 | 1144.481 | 1015.47  | 43651.96 | 509.6326 | 7243.685 | 930.3979 | 2525.848 | 202.9471 | 318.7156 |
| 183.853  | 1144.502 | 1015.03  | 43653.49 | 509.64   | 7243.776 | 930.4112 | 2526.036 | 202.9405 | 318.7092 |
| 183.9071 | 1144.501 | 1015.584 | 43654.71 | 509.6418 | 7243.827 | 930.4148 | 2526.188 | 202.955  | 318.7235 |
| 183.9573 | 1144.504 | 1015.939 | 43655.85 | 509.6442 | 7243.878 | 930.4194 | 2526.329 | 202.965  | 318.7334 |
| 184.016  | 1144.514 | 1015.988 | 43657.17 | 509.6487 | 7243.947 | 930.4276 | 2526.494 | 202.9688 | 318.7371 |
| 184.0871 | 1144.531 | 1015.788 | 43658.79 | 509.6553 | 7244.036 | 930.4395 | 2526.693 | 202.9676 | 318.736  |
| 184.1595 | 1144.558 | 1015.155 | 43660.43 | 509.664  | 7244.138 | 930.455  | 2526.896 | 202.9571 | 318.7256 |
| 184.2193 | 1144.566 | 1015.292 | 43661.77 | 509.6681 | 7244.206 | 930.4627 | 2527.064 | 202.9628 | 318.7312 |
| 184.2695 | 1144.564 | 1015.875 | 43662.9  | 509.6694 | 7244.25  | 930.4654 | 2527.204 | 202.9777 | 318.746  |
| 184.3225 | 1144.571 | 1016.045 | 43664.09 | 509.6729 | 7244.309 | 930.4718 | 2527.352 | 202.9838 | 318.752  |
| 184.388  | 1144.584 | 1015.99  | 43665.57 | 509.6783 | 7244.388 | 930.4818 | 2527.535 | 202.9855 | 318.7537 |
| 184.4625 | 1144.607 | 1015.535 | 43667.24 | 509.6863 | 7244.487 | 930.4961 | 2527.743 | 202.9789 | 318.7472 |
| 184.5159 | 1144.61  | 1015.902 | 43668.44 | 509.6889 | 7244.541 | 930.501  | 2527.891 | 202.9893 | 318.7575 |
| 184.5692 | 1144.616 | 1016.074 | 43669.63 | 509.6923 | 7244.6   | 930.5074 | 2528.04  | 202.9954 | 318.7636 |
| 184.6341 | 1144.63  | 1016.025 | 43671.08 | 509.6977 | 7244.677 | 930.5171 | 2528.22  | 202.9973 | 318.7654 |
| 184.7077 | 1144.651 | 1015.615 | 43672.73 | 509.7054 | 7244.774 | 930.5309 | 2528.425 | 202.9916 | 318.7598 |
| 184.7745 | 1144.673 | 1015.175 | 43674.22 | 509.7127 | 7244.864 | 930.544  | 2528.61  | 202.985  | 318.7532 |
| 184.8286 | 1144.672 | 1015.729 | 43675.43 | 509.7144 | 7244.913 | 930.5475 | 2528.76  | 202.9995 | 318.7676 |
| 184.8789 | 1144.674 | 1016.083 | 43676.54 | 509.7167 | 7244.963 | 930.5519 | 2528.899 | 203.0094 | 318.7774 |
| 184.9375 | 1144.684 | 1016.132 | 43677.85 | 509.7211 | 7245.03  | 930.56   | 2529.061 | 203.0131 | 318.7811 |
| 185.0086 | 1144.701 | 1015.932 | 43679.43 | 509.7276 | 7245.118 | 930.5717 | 2529.258 | 203.0119 | 318.7799 |
| 185.081  | 1144.727 | 1015.299 | 43681.04 | 509.7362 | 7245.219 | 930.587  | 2529.458 | 203.0013 | 318.7694 |
| 185.1409 | 1144.736 | 1015.436 | 43682.36 | 509.7403 | 7245.285 | 930.5945 | 2529.623 | 203.0069 | 318.7749 |
| 185.191  | 1144.733 | 1016.018 | 43683.47 | 509.7415 | 7245.328 | 930.5971 | 2529.761 | 203.0218 | 318.7897 |
| 185.2441 | 1144.74  | 1016.188 | 43684.64 | 509.7449 | 7245.386 | 930.6034 | 2529.907 | 203.0278 | 318.7957 |

|          |          |          |          |          |          |          |          |          |          |
|----------|----------|----------|----------|----------|----------|----------|----------|----------|----------|
| 185.3095 | 1144.753 | 1016.133 | 43686.08 | 509.7502 | 7245.463 | 930.6132 | 2530.087 | 203.0295 | 318.7973 |
| 185.384  | 1144.776 | 1015.678 | 43687.73 | 509.7581 | 7245.561 | 930.6273 | 2530.292 | 203.0229 | 318.7908 |
| 185.4374 | 1144.778 | 1016.045 | 43688.9  | 509.7606 | 7245.614 | 930.632  | 2530.438 | 203.0332 | 318.801  |
| 185.4908 | 1144.785 | 1016.217 | 43690.07 | 509.7639 | 7245.671 | 930.6383 | 2530.585 | 203.0393 | 318.807  |
| 185.5557 | 1144.797 | 1016.167 | 43691.5  | 509.7692 | 7245.747 | 930.6479 | 2530.763 | 203.0411 | 318.8088 |
| 185.6292 | 1144.819 | 1015.757 | 43693.11 | 509.7768 | 7245.842 | 930.6615 | 2530.964 | 203.0353 | 318.8031 |
| 185.6961 | 1144.84  | 1015.317 | 43694.58 | 509.784  | 7245.931 | 930.6744 | 2531.147 | 203.0287 | 318.7965 |
| 185.7502 | 1144.839 | 1015.871 | 43695.76 | 509.7856 | 7245.979 | 930.6777 | 2531.295 | 203.0431 | 318.8108 |
| 185.8004 | 1144.841 | 1016.225 | 43696.85 | 509.7879 | 7246.028 | 930.682  | 2531.432 | 203.053  | 318.8206 |
| 185.8591 | 1144.851 | 1016.274 | 43698.13 | 509.7922 | 7246.094 | 930.6899 | 2531.591 | 203.0566 | 318.8242 |
| 185.9302 | 1144.868 | 1016.073 | 43699.69 | 509.7986 | 7246.18  | 930.7015 | 2531.785 | 203.0553 | 318.8229 |
| 186.0026 | 1144.894 | 1015.44  | 43701.27 | 509.8071 | 7246.279 | 930.7166 | 2531.982 | 203.0447 | 318.8124 |
| 186.0624 | 1144.902 | 1015.577 | 43702.57 | 509.8111 | 7246.344 | 930.7239 | 2532.145 | 203.0502 | 318.8179 |
| 186.1126 | 1144.899 | 1016.159 | 43703.65 | 509.8122 | 7246.387 | 930.7264 | 2532.281 | 203.0651 | 318.8326 |
| 186.1656 | 1144.905 | 1016.329 | 43704.8  | 509.8155 | 7246.443 | 930.7325 | 2532.425 | 203.0711 | 318.8385 |
| 186.2311 | 1144.918 | 1016.274 | 43706.22 | 509.8208 | 7246.519 | 930.7421 | 2532.602 | 203.0727 | 318.8402 |
| 186.3056 | 1144.941 | 1015.818 | 43707.83 | 509.8286 | 7246.615 | 930.7561 | 2532.804 | 203.066  | 318.8335 |
| 186.359  | 1144.943 | 1016.185 | 43708.98 | 509.831  | 7246.666 | 930.7607 | 2532.949 | 203.0763 | 318.8437 |
| 186.4124 | 1144.95  | 1016.357 | 43710.13 | 509.8343 | 7246.723 | 930.7668 | 2533.093 | 203.0823 | 318.8497 |
| 186.4773 | 1144.962 | 1016.307 | 43711.53 | 509.8394 | 7246.798 | 930.7762 | 2533.268 | 203.084  | 318.8514 |
| 186.5508 | 1144.984 | 1015.897 | 43713.12 | 509.8469 | 7246.891 | 930.7896 | 2533.466 | 203.0782 | 318.8456 |
| 186.6176 | 1145.005 | 1015.456 | 43714.56 | 509.854  | 7246.978 | 930.8023 | 2533.647 | 203.0715 | 318.839  |
| 186.6717 | 1145.003 | 1016.01  | 43715.72 | 509.8556 | 7247.025 | 930.8055 | 2533.792 | 203.0859 | 318.8532 |
| 186.722  | 1145.005 | 1016.364 | 43716.79 | 509.8578 | 7247.073 | 930.8097 | 2533.927 | 203.0957 | 318.863  |
| 186.7806 | 1145.015 | 1016.413 | 43718.05 | 509.862  | 7247.138 | 930.8175 | 2534.085 | 203.0993 | 318.8665 |
| 186.8518 | 1145.031 | 1016.212 | 43719.57 | 509.8683 | 7247.223 | 930.8289 | 2534.276 | 203.098  | 318.8652 |
| 186.9242 | 1145.057 | 1015.578 | 43721.12 | 509.8767 | 7247.32  | 930.8438 | 2534.47  | 203.0873 | 318.8546 |
| 186.984  | 1145.065 | 1015.715 | 43722.4  | 509.8806 | 7247.384 | 930.851  | 2534.63  | 203.0928 | 318.86   |
| 187.0342 | 1145.062 | 1016.298 | 43723.46 | 509.8817 | 7247.425 | 930.8533 | 2534.764 | 203.1076 | 318.8747 |
| 187.0872 | 1145.068 | 1016.467 | 43724.59 | 509.8849 | 7247.48  | 930.8593 | 2534.906 | 203.1135 | 318.8806 |
| 187.1527 | 1145.081 | 1016.412 | 43725.98 | 509.8901 | 7247.555 | 930.8687 | 2535.081 | 203.1151 | 318.8822 |
| 187.2272 | 1145.103 | 1015.956 | 43727.57 | 509.8978 | 7247.65  | 930.8825 | 2535.28  | 203.1083 | 318.8755 |
| 187.2805 | 1145.106 | 1016.323 | 43728.7  | 509.9001 | 7247.7   | 930.8869 | 2535.422 | 203.1186 | 318.8856 |
| 187.3339 | 1145.112 | 1016.494 | 43729.83 | 509.9033 | 7247.755 | 930.8929 | 2535.564 | 203.1246 | 318.8915 |

|          |          |          |          |          |          |          |          |          |          |
|----------|----------|----------|----------|----------|----------|----------|----------|----------|----------|
| 187.3988 | 1145.124 | 1016.445 | 43731.2  | 509.9084 | 7247.828 | 930.9022 | 2535.737 | 203.1262 | 318.8932 |
| 187.4723 | 1145.145 | 1016.034 | 43732.76 | 509.9157 | 7247.921 | 930.9154 | 2535.933 | 203.1204 | 318.8874 |
| 187.5392 | 1145.166 | 1015.593 | 43734.17 | 509.9228 | 7248.006 | 930.928  | 2536.11  | 203.1136 | 318.8807 |
| 187.5933 | 1145.164 | 1016.147 | 43735.31 | 509.9242 | 7248.052 | 930.931  | 2536.254 | 203.1279 | 318.8949 |
| 187.6436 | 1145.166 | 1016.501 | 43736.36 | 509.9264 | 7248.099 | 930.9351 | 2536.387 | 203.1377 | 318.9046 |
| 187.7022 | 1145.175 | 1016.549 | 43737.59 | 509.9305 | 7248.162 | 930.9427 | 2536.542 | 203.1412 | 318.9081 |
| 187.7733 | 1145.192 | 1016.348 | 43739.09 | 509.9367 | 7248.246 | 930.9539 | 2536.73  | 203.1398 | 318.9067 |
| 187.8457 | 1145.217 | 1015.714 | 43740.61 | 509.945  | 7248.342 | 930.9686 | 2536.922 | 203.1291 | 318.896  |
| 187.9055 | 1145.225 | 1015.851 | 43741.86 | 509.9488 | 7248.404 | 930.9756 | 2537.08  | 203.1345 | 318.9014 |
| 187.9557 | 1145.222 | 1016.434 | 43742.91 | 509.9498 | 7248.445 | 930.9779 | 2537.212 | 203.1493 | 318.9161 |
| 188.0088 | 1145.228 | 1016.603 | 43744.02 | 509.953  | 7248.499 | 930.9837 | 2537.351 | 203.1552 | 318.9219 |
| 188.0742 | 1145.241 | 1016.547 | 43745.38 | 509.958  | 7248.572 | 930.993  | 2537.524 | 203.1567 | 318.9234 |
| 188.1487 | 1145.263 | 1016.091 | 43746.94 | 509.9656 | 7248.665 | 931.0066 | 2537.72  | 203.1499 | 318.9166 |
| 188.2021 | 1145.265 | 1016.458 | 43748.05 | 509.9679 | 7248.714 | 931.0109 | 2537.86  | 203.1601 | 318.9267 |
| 188.2555 | 1145.271 | 1016.629 | 43749.16 | 509.971  | 7248.768 | 931.0167 | 2538     | 203.166  | 318.9326 |
| 188.3204 | 1145.283 | 1016.579 | 43750.5  | 509.976  | 7248.84  | 931.0258 | 2538.17  | 203.1676 | 318.9342 |
| 188.3939 | 1145.304 | 1016.168 | 43752.03 | 509.9833 | 7248.931 | 931.0389 | 2538.363 | 203.1617 | 318.9284 |
| 188.4608 | 1145.324 | 1015.728 | 43753.42 | 509.9902 | 7249.015 | 931.0512 | 2538.538 | 203.1549 | 318.9216 |
| 188.5149 | 1145.323 | 1016.281 | 43754.53 | 509.9916 | 7249.06  | 931.0542 | 2538.679 | 203.1691 | 318.9357 |
| 188.5651 | 1145.324 | 1016.635 | 43755.57 | 509.9937 | 7249.105 | 931.0581 | 2538.81  | 203.1789 | 318.9454 |
| 188.6238 | 1145.333 | 1016.683 | 43756.78 | 509.9977 | 7249.168 | 931.0655 | 2538.963 | 203.1824 | 318.9489 |
| 188.6949 | 1145.35  | 1016.482 | 43758.25 | 510.0038 | 7249.25  | 931.0766 | 2539.149 | 203.1809 | 318.9474 |
| 188.7673 | 1145.375 | 1015.848 | 43759.74 | 510.012  | 7249.345 | 931.0912 | 2539.338 | 203.1701 | 318.9367 |
| 188.8271 | 1145.382 | 1015.984 | 43760.97 | 510.0158 | 7249.406 | 931.098  | 2539.493 | 203.1755 | 318.942  |
| 188.8773 | 1145.379 | 1016.567 | 43762    | 510.0167 | 7249.445 | 931.1001 | 2539.623 | 203.1902 | 318.9566 |
| 188.9303 | 1145.385 | 1016.736 | 43763.08 | 510.0198 | 7249.498 | 931.1058 | 2539.761 | 203.1961 | 318.9625 |
| 188.9958 | 1145.397 | 1016.68  | 43764.42 | 510.0248 | 7249.57  | 931.1149 | 2539.931 | 203.1975 | 318.9639 |
| 189.0703 | 1145.419 | 1016.224 | 43765.95 | 510.0323 | 7249.662 | 931.1283 | 2540.124 | 203.1907 | 318.9571 |
| 189.1237 | 1145.421 | 1016.591 | 43767.04 | 510.0344 | 7249.71  | 931.1325 | 2540.262 | 203.2008 | 318.9671 |
| 189.1771 | 1145.427 | 1016.762 | 43768.13 | 510.0375 | 7249.763 | 931.1382 | 2540.4   | 203.2067 | 318.973  |
| 189.2419 | 1145.439 | 1016.712 | 43769.45 | 510.0424 | 7249.834 | 931.1472 | 2540.568 | 203.2083 | 318.9745 |
| 189.3155 | 1145.459 | 1016.3   | 43770.95 | 510.0496 | 7249.923 | 931.16   | 2540.758 | 203.2023 | 318.9686 |
| 189.3823 | 1145.48  | 1015.859 | 43772.31 | 510.0564 | 7250.006 | 931.1723 | 2540.93  | 203.1954 | 318.9617 |
| 189.4364 | 1145.478 | 1016.413 | 43773.41 | 510.0578 | 7250.049 | 931.175  | 2541.07  | 203.2096 | 318.9759 |

|          |          |          |          |          |          |          |          |          |          |
|----------|----------|----------|----------|----------|----------|----------|----------|----------|----------|
| 189.4867 | 1145.479 | 1016.767 | 43774.42 | 510.0597 | 7250.094 | 931.1789 | 2541.199 | 203.2194 | 318.9855 |
| 189.5453 | 1145.488 | 1016.815 | 43775.61 | 510.0637 | 7250.155 | 931.1862 | 2541.35  | 203.2228 | 318.9889 |
| 189.6165 | 1145.504 | 1016.613 | 43777.05 | 510.0697 | 7250.236 | 931.197  | 2541.532 | 203.2213 | 318.9874 |
| 189.6888 | 1145.529 | 1015.979 | 43778.52 | 510.0778 | 7250.329 | 931.2114 | 2541.718 | 203.2104 | 318.9766 |
| 189.7487 | 1145.537 | 1016.115 | 43779.72 | 510.0815 | 7250.389 | 931.2182 | 2541.872 | 203.2157 | 318.9819 |
| 189.7988 | 1145.533 | 1016.698 | 43780.73 | 510.0824 | 7250.427 | 931.2201 | 2542     | 203.2304 | 318.9965 |
| 189.8519 | 1145.539 | 1016.867 | 43781.8  | 510.0854 | 7250.479 | 931.2257 | 2542.136 | 203.2362 | 319.0022 |
| 189.9173 | 1145.551 | 1016.811 | 43783.11 | 510.0903 | 7250.55  | 931.2347 | 2542.303 | 203.2376 | 319.0036 |
| 189.9918 | 1145.573 | 1016.354 | 43784.61 | 510.0977 | 7250.64  | 931.2479 | 2542.493 | 203.2307 | 318.9967 |
| 190.0452 | 1145.574 | 1016.721 | 43785.68 | 510.0998 | 7250.687 | 931.2519 | 2542.629 | 203.2408 | 319.0068 |
| 190.0986 | 1145.58  | 1016.892 | 43786.75 | 510.1028 | 7250.739 | 931.2575 | 2542.765 | 203.2466 | 319.0126 |
| 190.1635 | 1145.592 | 1016.842 | 43788.05 | 510.1076 | 7250.809 | 931.2663 | 2542.931 | 203.2481 | 319.014  |
| 190.237  | 1145.612 | 1016.43  | 43789.52 | 510.1147 | 7250.896 | 931.279  | 2543.118 | 203.2421 | 319.0081 |
| 190.3039 | 1145.632 | 1015.989 | 43790.86 | 510.1214 | 7250.978 | 931.291  | 2543.288 | 203.2352 | 319.0012 |
| 190.358  | 1145.63  | 1016.542 | 43791.93 | 510.1227 | 7251.02  | 931.2937 | 2543.425 | 203.2494 | 319.0152 |
| 190.4082 | 1145.631 | 1016.896 | 43792.93 | 510.1246 | 7251.064 | 931.2974 | 2543.552 | 203.259  | 319.0248 |
| 190.4669 | 1145.64  | 1016.944 | 43794.09 | 510.1285 | 7251.124 | 931.3046 | 2543.701 | 203.2624 | 319.0282 |
| 190.538  | 1145.656 | 1016.742 | 43795.51 | 510.1344 | 7251.203 | 931.3152 | 2543.881 | 203.2608 | 319.0266 |
| 190.6104 | 1145.681 | 1016.107 | 43796.95 | 510.1424 | 7251.295 | 931.3295 | 2544.064 | 203.2499 | 319.0158 |
| 190.6702 | 1145.688 | 1016.244 | 43798.13 | 510.146  | 7251.354 | 931.3361 | 2544.215 | 203.2552 | 319.021  |
| 190.7204 | 1145.685 | 1016.826 | 43799.12 | 510.1468 | 7251.391 | 931.3379 | 2544.342 | 203.2699 | 319.0356 |
| 190.7734 | 1145.69  | 1016.995 | 43800.16 | 510.1497 | 7251.442 | 931.3434 | 2544.476 | 203.2756 | 319.0413 |
| 190.8389 | 1145.702 | 1016.939 | 43801.46 | 510.1546 | 7251.512 | 931.3522 | 2544.64  | 203.277  | 319.0426 |
| 190.9134 | 1145.723 | 1016.482 | 43802.93 | 510.1619 | 7251.6   | 931.3652 | 2544.828 | 203.27   | 319.0357 |
| 190.9668 | 1145.725 | 1016.848 | 43803.98 | 510.1639 | 7251.646 | 931.3691 | 2544.962 | 203.28   | 319.0456 |
| 191.0202 | 1145.73  | 1017.019 | 43805.02 | 510.1668 | 7251.697 | 931.3746 | 2545.096 | 203.2859 | 319.0514 |
| 191.0851 | 1145.742 | 1016.969 | 43806.3  | 510.1716 | 7251.766 | 931.3832 | 2545.259 | 203.2873 | 319.0528 |
| 191.1586 | 1145.762 | 1016.557 | 43807.74 | 510.1786 | 7251.852 | 931.3957 | 2545.443 | 203.2812 | 319.0468 |
| 191.2255 | 1145.782 | 1016.116 | 43809.06 | 510.1852 | 7251.932 | 931.4076 | 2545.611 | 203.2742 | 319.0399 |
| 191.2796 | 1145.78  | 1016.669 | 43810.11 | 510.1864 | 7251.974 | 931.4102 | 2545.746 | 203.2884 | 319.0539 |
| 191.3298 | 1145.781 | 1017.023 | 43811.09 | 510.1883 | 7252.016 | 931.4137 | 2545.872 | 203.298  | 319.0635 |
| 191.3884 | 1145.789 | 1017.071 | 43812.23 | 510.1921 | 7252.075 | 931.4208 | 2546.018 | 203.3013 | 319.0668 |
| 191.4596 | 1145.805 | 1016.869 | 43813.62 | 510.1979 | 7252.153 | 931.4313 | 2546.196 | 203.2997 | 319.0651 |
| 191.532  | 1145.83  | 1016.234 | 43815.04 | 510.2058 | 7252.243 | 931.4453 | 2546.376 | 203.2887 | 319.0542 |

|          |          |          |          |          |          |          |          |          |          |
|----------|----------|----------|----------|----------|----------|----------|----------|----------|----------|
| 191.5918 | 1145.837 | 1016.37  | 43816.2  | 510.2093 | 7252.301 | 931.4518 | 2546.525 | 203.294  | 319.0595 |
| 191.642  | 1145.833 | 1016.952 | 43817.17 | 510.2101 | 7252.338 | 931.4535 | 2546.65  | 203.3086 | 319.0739 |
| 191.695  | 1145.838 | 1017.121 | 43818.19 | 510.2129 | 7252.387 | 931.4589 | 2546.781 | 203.3143 | 319.0796 |
| 191.7605 | 1145.85  | 1017.065 | 43819.46 | 510.2177 | 7252.456 | 931.4675 | 2546.944 | 203.3156 | 319.0809 |
| 191.835  | 1145.871 | 1016.608 | 43820.91 | 510.2249 | 7252.543 | 931.4804 | 2547.129 | 203.3085 | 319.0739 |
| 191.8883 | 1145.873 | 1016.974 | 43821.94 | 510.2268 | 7252.588 | 931.4842 | 2547.261 | 203.3186 | 319.0838 |
| 191.9417 | 1145.878 | 1017.145 | 43822.96 | 510.2297 | 7252.638 | 931.4895 | 2547.393 | 203.3243 | 319.0896 |
| 192.0066 | 1145.889 | 1017.094 | 43824.22 | 510.2344 | 7252.705 | 931.498  | 2547.553 | 203.3257 | 319.0909 |
| 192.0801 | 1145.909 | 1016.682 | 43825.63 | 510.2413 | 7252.79  | 931.5103 | 2547.735 | 203.3196 | 319.0848 |
| 192.147  | 1145.929 | 1016.24  | 43826.92 | 510.2478 | 7252.869 | 931.5221 | 2547.9   | 203.3125 | 319.0778 |
| 192.2011 | 1145.927 | 1016.794 | 43827.96 | 510.249  | 7252.909 | 931.5245 | 2548.033 | 203.3266 | 319.0918 |
| 192.2514 | 1145.927 | 1017.147 | 43828.92 | 510.2507 | 7252.951 | 931.5279 | 2548.157 | 203.3362 | 319.1014 |
| 192.31   | 1145.936 | 1017.195 | 43830.04 | 510.2545 | 7253.009 | 931.5348 | 2548.301 | 203.3395 | 319.1046 |
| 192.3811 | 1145.951 | 1016.993 | 43831.4  | 510.2602 | 7253.085 | 931.5452 | 2548.476 | 203.3378 | 319.1029 |
| 192.4535 | 1145.976 | 1016.358 | 43832.79 | 510.2681 | 7253.174 | 931.5591 | 2548.654 | 203.3268 | 319.092  |
| 192.5134 | 1145.982 | 1016.494 | 43833.93 | 510.2715 | 7253.231 | 931.5654 | 2548.801 | 203.332  | 319.0972 |
| 192.5635 | 1145.979 | 1017.076 | 43834.88 | 510.2722 | 7253.266 | 931.567  | 2548.924 | 203.3466 | 319.1116 |
| 192.6166 | 1145.984 | 1017.245 | 43835.89 | 510.275  | 7253.315 | 931.5722 | 2549.053 | 203.3523 | 319.1172 |
| 192.682  | 1145.995 | 1017.188 | 43837.14 | 510.2796 | 7253.382 | 931.5807 | 2549.214 | 203.3535 | 319.1185 |
| 192.7565 | 1146.016 | 1016.731 | 43838.55 | 510.2867 | 7253.468 | 931.5934 | 2549.396 | 203.3464 | 319.1114 |
| 192.8099 | 1146.018 | 1017.097 | 43839.56 | 510.2886 | 7253.512 | 931.5971 | 2549.526 | 203.3564 | 319.1213 |
| 192.8633 | 1146.023 | 1017.268 | 43840.57 | 510.2914 | 7253.561 | 931.6023 | 2549.656 | 203.3621 | 319.127  |
| 192.9282 | 1146.034 | 1017.217 | 43841.8  | 510.296  | 7253.627 | 931.6106 | 2549.814 | 203.3634 | 319.1283 |
| 193.0017 | 1146.054 | 1016.805 | 43843.19 | 510.3028 | 7253.71  | 931.6228 | 2549.993 | 203.3572 | 319.1222 |
| 193.0686 | 1146.073 | 1016.363 | 43844.46 | 510.3093 | 7253.788 | 931.6344 | 2550.156 | 203.3501 | 319.1151 |
| 193.1227 | 1146.071 | 1016.916 | 43845.47 | 510.3104 | 7253.827 | 931.6367 | 2550.287 | 203.3642 | 319.1291 |
| 193.1729 | 1146.071 | 1017.269 | 43846.42 | 510.3121 | 7253.868 | 931.64   | 2550.409 | 203.3738 | 319.1386 |
| 193.2316 | 1146.08  | 1017.317 | 43847.52 | 510.3158 | 7253.925 | 931.6468 | 2550.551 | 203.377  | 319.1418 |
| 193.3027 | 1146.095 | 1017.115 | 43848.86 | 510.3214 | 7254     | 931.657  | 2550.724 | 203.3753 | 319.14   |
| 193.3751 | 1146.119 | 1016.479 | 43850.22 | 510.3291 | 7254.088 | 931.6707 | 2550.899 | 203.3641 | 319.129  |
| 193.4349 | 1146.126 | 1016.615 | 43851.34 | 510.3325 | 7254.143 | 931.6769 | 2551.044 | 203.3693 | 319.1342 |
| 193.4851 | 1146.122 | 1017.197 | 43852.27 | 510.3331 | 7254.178 | 931.6784 | 2551.165 | 203.3839 | 319.1486 |
| 193.5381 | 1146.127 | 1017.366 | 43853.26 | 510.3358 | 7254.226 | 931.6835 | 2551.292 | 203.3895 | 319.1542 |
| 193.6036 | 1146.138 | 1017.309 | 43854.48 | 510.3404 | 7254.292 | 931.6918 | 2551.45  | 203.3907 | 319.1554 |

|          |          |          |          |          |          |          |          |          |          |
|----------|----------|----------|----------|----------|----------|----------|----------|----------|----------|
| 193.6781 | 1146.159 | 1016.852 | 43855.87 | 510.3474 | 7254.376 | 931.7044 | 2551.63  | 203.3835 | 319.1482 |
| 193.7315 | 1146.16  | 1017.218 | 43856.86 | 510.3493 | 7254.419 | 931.7079 | 2551.758 | 203.3935 | 319.1581 |
| 193.7849 | 1146.165 | 1017.388 | 43857.86 | 510.352  | 7254.467 | 931.713  | 2551.886 | 203.3992 | 319.1637 |
| 193.8498 | 1146.176 | 1017.337 | 43859.06 | 510.3565 | 7254.532 | 931.7212 | 2552.042 | 203.4005 | 319.165  |
| 193.9233 | 1146.196 | 1016.925 | 43860.43 | 510.3632 | 7254.614 | 931.7332 | 2552.219 | 203.3942 | 319.1588 |
| 193.9901 | 1146.215 | 1016.483 | 43861.67 | 510.3696 | 7254.69  | 931.7447 | 2552.379 | 203.387  | 319.1517 |
| 194.0442 | 1146.212 | 1017.036 | 43862.67 | 510.3706 | 7254.729 | 931.7468 | 2552.508 | 203.4011 | 319.1656 |
| 194.0945 | 1146.213 | 1017.389 | 43863.59 | 510.3723 | 7254.769 | 931.75   | 2552.628 | 203.4106 | 319.1751 |
| 194.1531 | 1146.221 | 1017.437 | 43864.67 | 510.3759 | 7254.824 | 931.7567 | 2552.768 | 203.4138 | 319.1782 |
| 194.2243 | 1146.236 | 1017.234 | 43865.99 | 510.3814 | 7254.899 | 931.7667 | 2552.938 | 203.412  | 319.1765 |
| 194.2967 | 1146.26  | 1016.599 | 43867.32 | 510.3891 | 7254.985 | 931.7803 | 2553.111 | 203.4008 | 319.1654 |
| 194.3565 | 1146.266 | 1016.734 | 43868.42 | 510.3924 | 7255.039 | 931.7863 | 2553.253 | 203.406  | 319.1705 |
| 194.4066 | 1146.262 | 1017.316 | 43869.34 | 510.3929 | 7255.073 | 931.7877 | 2553.373 | 203.4205 | 319.1849 |
| 194.4597 | 1146.267 | 1017.485 | 43870.31 | 510.3956 | 7255.12  | 931.7927 | 2553.499 | 203.4261 | 319.1904 |
| 194.5252 | 1146.278 | 1017.428 | 43871.51 | 510.4001 | 7255.184 | 931.8009 | 2553.654 | 203.4272 | 319.1916 |
| 194.5996 | 1146.299 | 1016.97  | 43872.87 | 510.407  | 7255.268 | 931.8133 | 2553.831 | 203.42   | 319.1844 |
| 194.653  | 1146.3   | 1017.336 | 43873.85 | 510.4088 | 7255.31  | 931.8167 | 2553.958 | 203.4299 | 319.1942 |
| 194.7064 | 1146.304 | 1017.507 | 43874.82 | 510.4114 | 7255.356 | 931.8217 | 2554.084 | 203.4356 | 319.1998 |
| 194.7713 | 1146.315 | 1017.456 | 43876    | 510.4159 | 7255.42  | 931.8297 | 2554.237 | 203.4368 | 319.201  |
| 194.8448 | 1146.335 | 1017.043 | 43877.34 | 510.4225 | 7255.501 | 931.8416 | 2554.411 | 203.4305 | 319.1948 |
| 194.9117 | 1146.354 | 1016.601 | 43878.56 | 510.4288 | 7255.576 | 931.8529 | 2554.569 | 203.4233 | 319.1876 |
| 194.9658 | 1146.351 | 1017.154 | 43879.54 | 510.4298 | 7255.614 | 931.8549 | 2554.697 | 203.4373 | 319.2015 |
| 195.0161 | 1146.351 | 1017.507 | 43880.45 | 510.4314 | 7255.653 | 931.858  | 2554.815 | 203.4468 | 319.2109 |
| 195.0747 | 1146.359 | 1017.555 | 43881.51 | 510.4349 | 7255.707 | 931.8645 | 2554.953 | 203.4499 | 319.214  |
| 195.1458 | 1146.374 | 1017.352 | 43882.8  | 510.4404 | 7255.78  | 931.8744 | 2555.12  | 203.4481 | 319.2122 |
| 195.2182 | 1146.398 | 1016.716 | 43884.11 | 510.4479 | 7255.865 | 931.8878 | 2555.291 | 203.4368 | 319.2011 |
| 195.278  | 1146.404 | 1016.851 | 43885.19 | 510.4511 | 7255.918 | 931.8937 | 2555.431 | 203.4419 | 319.2061 |
| 195.3282 | 1146.4   | 1017.433 | 43886.09 | 510.4516 | 7255.951 | 931.895  | 2555.549 | 203.4564 | 319.2205 |
| 195.3813 | 1146.405 | 1017.602 | 43887.04 | 510.4542 | 7255.997 | 931.8999 | 2555.673 | 203.462  | 319.226  |
| 195.4467 | 1146.416 | 1017.545 | 43888.22 | 510.4587 | 7256.06  | 931.9079 | 2555.826 | 203.4631 | 319.2271 |
| 195.5212 | 1146.436 | 1017.087 | 43889.56 | 510.4655 | 7256.142 | 931.9202 | 2556     | 203.4558 | 319.2198 |
| 195.5746 | 1146.437 | 1017.453 | 43890.52 | 510.4672 | 7256.184 | 931.9235 | 2556.125 | 203.4657 | 319.2296 |
| 195.628  | 1146.441 | 1017.623 | 43891.47 | 510.4698 | 7256.229 | 931.9283 | 2556.249 | 203.4713 | 319.2352 |
| 195.6929 | 1146.452 | 1017.572 | 43892.63 | 510.4741 | 7256.292 | 931.9362 | 2556.401 | 203.4725 | 319.2364 |

|          |          |          |          |          |          |          |          |          |          |
|----------|----------|----------|----------|----------|----------|----------|----------|----------|----------|
| 195.7664 | 1146.471 | 1017.159 | 43893.95 | 510.4807 | 7256.371 | 931.9479 | 2556.572 | 203.4661 | 319.2301 |
| 195.8333 | 1146.49  | 1016.717 | 43895.14 | 510.487  | 7256.445 | 931.9591 | 2556.728 | 203.4588 | 319.2229 |
| 195.8874 | 1146.487 | 1017.269 | 43896.1  | 510.4878 | 7256.482 | 931.961  | 2556.853 | 203.4728 | 319.2367 |
| 195.9376 | 1146.488 | 1017.623 | 43897    | 510.4894 | 7256.52  | 931.964  | 2556.97  | 203.4823 | 319.2461 |
| 195.9963 | 1146.495 | 1017.67  | 43898.04 | 510.4928 | 7256.574 | 931.9704 | 2557.106 | 203.4854 | 319.2492 |
| 196.0674 | 1146.51  | 1017.467 | 43899.3  | 510.4982 | 7256.645 | 931.9801 | 2557.271 | 203.4835 | 319.2473 |
| 196.1398 | 1146.533 | 1016.831 | 43900.59 | 510.5057 | 7256.729 | 931.9934 | 2557.439 | 203.4722 | 319.2361 |
| 196.1996 | 1146.54  | 1016.966 | 43901.65 | 510.5088 | 7256.781 | 931.9992 | 2557.577 | 203.4773 | 319.2411 |
| 196.2498 | 1146.535 | 1017.548 | 43902.53 | 510.5093 | 7256.813 | 932.0004 | 2557.693 | 203.4917 | 319.2554 |
| 196.3028 | 1146.54  | 1017.717 | 43903.47 | 510.5118 | 7256.858 | 932.0051 | 2557.815 | 203.4972 | 319.2609 |
| 196.3683 | 1146.551 | 1017.659 | 43904.62 | 510.5162 | 7256.921 | 932.013  | 2557.966 | 203.4983 | 319.262  |
| 196.4428 | 1146.571 | 1017.201 | 43905.94 | 510.5229 | 7257.001 | 932.0251 | 2558.138 | 203.4909 | 319.2547 |
| 196.4962 | 1146.571 | 1017.567 | 43906.88 | 510.5246 | 7257.041 | 932.0283 | 2558.26  | 203.5008 | 319.2644 |
| 196.5496 | 1146.576 | 1017.737 | 43907.81 | 510.5271 | 7257.086 | 932.033  | 2558.383 | 203.5063 | 319.2699 |
| 196.6144 | 1146.586 | 1017.686 | 43908.95 | 510.5314 | 7257.148 | 932.0408 | 2558.532 | 203.5075 | 319.2711 |
| 196.688  | 1146.605 | 1017.273 | 43910.25 | 510.5378 | 7257.226 | 932.0523 | 2558.701 | 203.5011 | 319.2647 |
| 196.7548 | 1146.624 | 1016.83  | 43911.42 | 510.544  | 7257.299 | 932.0633 | 2558.854 | 203.4938 | 319.2575 |
| 196.8089 | 1146.621 | 1017.383 | 43912.36 | 510.5448 | 7257.335 | 932.0651 | 2558.978 | 203.5077 | 319.2713 |
| 196.8592 | 1146.621 | 1017.736 | 43913.24 | 510.5463 | 7257.372 | 932.0681 | 2559.093 | 203.5171 | 319.2806 |
| 196.9178 | 1146.629 | 1017.783 | 43914.26 | 510.5497 | 7257.424 | 932.0743 | 2559.227 | 203.5202 | 319.2837 |
| 196.989  | 1146.643 | 1017.58  | 43915.5  | 510.555  | 7257.495 | 932.0839 | 2559.39  | 203.5182 | 319.2817 |
| 197.0613 | 1146.667 | 1016.944 | 43916.77 | 510.5624 | 7257.577 | 932.097  | 2559.555 | 203.5069 | 319.2705 |
| 197.1212 | 1146.673 | 1017.079 | 43917.8  | 510.5654 | 7257.628 | 932.1027 | 2559.691 | 203.5119 | 319.2755 |
| 197.1713 | 1146.668 | 1017.661 | 43918.67 | 510.5658 | 7257.659 | 932.1038 | 2559.805 | 203.5263 | 319.2897 |
| 197.2244 | 1146.672 | 1017.829 | 43919.59 | 510.5683 | 7257.704 | 932.1084 | 2559.926 | 203.5318 | 319.2952 |
| 197.2898 | 1146.683 | 1017.772 | 43920.72 | 510.5726 | 7257.765 | 932.1162 | 2560.075 | 203.5328 | 319.2962 |
| 197.3643 | 1146.703 | 1017.313 | 43922.02 | 510.5793 | 7257.844 | 932.1281 | 2560.244 | 203.5254 | 319.2888 |
| 197.4177 | 1146.703 | 1017.679 | 43922.93 | 510.5808 | 7257.883 | 932.1312 | 2560.365 | 203.5352 | 319.2986 |
| 197.4711 | 1146.708 | 1017.849 | 43923.85 | 510.5833 | 7257.927 | 932.1358 | 2560.486 | 203.5407 | 319.3041 |
| 197.536  | 1146.718 | 1017.798 | 43924.97 | 510.5875 | 7257.988 | 932.1434 | 2560.633 | 203.5419 | 319.3051 |
| 197.6095 | 1146.737 | 1017.385 | 43926.24 | 510.5939 | 7258.065 | 932.1548 | 2560.799 | 203.5354 | 319.2987 |
| 197.6764 | 1146.756 | 1016.942 | 43927.39 | 510.6    | 7258.136 | 932.1657 | 2560.95  | 203.528  | 319.2914 |
| 197.7305 | 1146.752 | 1017.494 | 43928.32 | 510.6007 | 7258.171 | 932.1674 | 2561.072 | 203.5419 | 319.3052 |
| 197.7807 | 1146.752 | 1017.847 | 43929.18 | 510.6021 | 7258.208 | 932.1702 | 2561.185 | 203.5513 | 319.3145 |

|          |          |          |          |          |          |          |          |          |          |
|----------|----------|----------|----------|----------|----------|----------|----------|----------|----------|
| 197.8394 | 1146.76  | 1017.894 | 43930.18 | 510.6055 | 7258.259 | 932.1763 | 2561.317 | 203.5543 | 319.3175 |
| 197.9105 | 1146.774 | 1017.691 | 43931.4  | 510.6107 | 7258.328 | 932.1858 | 2561.477 | 203.5523 | 319.3155 |
| 197.9829 | 1146.797 | 1017.054 | 43932.64 | 510.618  | 7258.41  | 932.1987 | 2561.64  | 203.5409 | 319.3042 |
| 198.0427 | 1146.803 | 1017.19  | 43933.66 | 510.621  | 7258.46  | 932.2042 | 2561.774 | 203.5459 | 319.3092 |
| 198.0929 | 1146.798 | 1017.772 | 43934.51 | 510.6214 | 7258.49  | 932.2052 | 2561.887 | 203.5603 | 319.3234 |
| 198.1459 | 1146.803 | 1017.94  | 43935.41 | 510.6238 | 7258.533 | 932.2097 | 2562.006 | 203.5658 | 319.3288 |
| 198.2114 | 1146.813 | 1017.882 | 43936.53 | 510.628  | 7258.593 | 932.2174 | 2562.152 | 203.5667 | 319.3298 |
| 198.2859 | 1146.833 | 1017.423 | 43937.79 | 510.6346 | 7258.671 | 932.2291 | 2562.319 | 203.5592 | 319.3224 |
| 198.3393 | 1146.833 | 1017.789 | 43938.7  | 510.6361 | 7258.71  | 932.2321 | 2562.438 | 203.569  | 319.3321 |
| 198.3927 | 1146.837 | 1017.959 | 43939.6  | 510.6385 | 7258.753 | 932.2366 | 2562.557 | 203.5745 | 319.3375 |
| 198.4576 | 1146.848 | 1017.908 | 43940.7  | 510.6426 | 7258.812 | 932.2441 | 2562.702 | 203.5756 | 319.3386 |
| 198.5311 | 1146.866 | 1017.494 | 43941.94 | 510.6489 | 7258.888 | 932.2554 | 2562.866 | 203.5691 | 319.3321 |
| 198.598  | 1146.885 | 1017.051 | 43943.07 | 510.655  | 7258.959 | 932.2661 | 2563.015 | 203.5617 | 319.3248 |
| 198.6521 | 1146.881 | 1017.604 | 43943.98 | 510.6556 | 7258.992 | 932.2677 | 2563.135 | 203.5755 | 319.3385 |
| 198.7023 | 1146.881 | 1017.957 | 43944.82 | 510.657  | 7259.028 | 932.2704 | 2563.247 | 203.5849 | 319.3478 |
| 198.7609 | 1146.888 | 1018.004 | 43945.81 | 510.6603 | 7259.079 | 932.2764 | 2563.377 | 203.5879 | 319.3508 |
| 198.8321 | 1146.902 | 1017.8   | 43947.01 | 510.6654 | 7259.147 | 932.2857 | 2563.535 | 203.5858 | 319.3487 |
| 198.9045 | 1146.925 | 1017.163 | 43948.22 | 510.6727 | 7259.227 | 932.2985 | 2563.695 | 203.5744 | 319.3374 |
| 198.9643 | 1146.931 | 1017.298 | 43949.22 | 510.6756 | 7259.276 | 932.3039 | 2563.827 | 203.5793 | 319.3423 |
| 199.0145 | 1146.926 | 1017.88  | 43950.06 | 510.6759 | 7259.305 | 932.3048 | 2563.938 | 203.5936 | 319.3565 |
| 199.0675 | 1146.93  | 1018.048 | 43950.94 | 510.6782 | 7259.348 | 932.3092 | 2564.055 | 203.5991 | 319.3619 |
| 199.133  | 1146.941 | 1017.99  | 43952.04 | 510.6824 | 7259.407 | 932.3168 | 2564.2   | 203.6    | 319.3628 |
| 199.2075 | 1146.96  | 1017.532 | 43953.28 | 510.6889 | 7259.484 | 932.3283 | 2564.364 | 203.5925 | 319.3553 |
| 199.2609 | 1146.96  | 1017.897 | 43954.17 | 510.6903 | 7259.521 | 932.3312 | 2564.481 | 203.6022 | 319.365  |
| 199.3142 | 1146.964 | 1018.067 | 43955.05 | 510.6927 | 7259.563 | 932.3356 | 2564.599 | 203.6077 | 319.3704 |
| 199.3791 | 1146.975 | 1018.015 | 43956.13 | 510.6967 | 7259.621 | 932.343  | 2564.741 | 203.6087 | 319.3714 |
| 199.4526 | 1146.993 | 1017.602 | 43957.35 | 510.7029 | 7259.696 | 932.3541 | 2564.903 | 203.6021 | 319.3649 |
| 199.5195 | 1147.011 | 1017.158 | 43958.46 | 510.7089 | 7259.765 | 932.3647 | 2565.05  | 203.5947 | 319.3575 |
| 199.5736 | 1147.008 | 1017.711 | 43959.35 | 510.7095 | 7259.799 | 932.3662 | 2565.168 | 203.6085 | 319.3712 |
| 199.6239 | 1147.007 | 1018.064 | 43960.18 | 510.7108 | 7259.833 | 932.3688 | 2565.278 | 203.6178 | 319.3804 |
| 199.6825 | 1147.015 | 1018.111 | 43961.15 | 510.714  | 7259.883 | 932.3747 | 2565.406 | 203.6208 | 319.3834 |
| 199.7536 | 1147.028 | 1017.907 | 43962.32 | 510.7191 | 7259.95  | 932.3838 | 2565.562 | 203.6187 | 319.3813 |
| 199.826  | 1147.051 | 1017.27  | 43963.52 | 510.7263 | 7260.029 | 932.3965 | 2565.72  | 203.6072 | 319.3699 |
| 199.8859 | 1147.057 | 1017.405 | 43964.5  | 510.7291 | 7260.077 | 932.4018 | 2565.85  | 203.6121 | 319.3747 |



|          |          |          |          |          |          |          |          |          |          |
|----------|----------|----------|----------|----------|----------|----------|----------|----------|----------|
| 199.936  | 1147.052 | 1017.987 | 43965.32 | 510.7294 | 7260.105 | 932.4026 | 2565.959 | 203.6264 | 319.3889 |
| 199.9891 | 1147.056 | 1018.155 | 43966.19 | 510.7317 | 7260.147 | 932.4069 | 2566.074 | 203.6318 | 319.3943 |
| 200.0545 | 1147.066 | 1018.097 | 43967.26 | 510.7357 | 7260.205 | 932.4143 | 2566.217 | 203.6326 | 319.3951 |
| 200.129  | 1147.085 | 1017.638 | 43968.48 | 510.7421 | 7260.281 | 932.4257 | 2566.379 | 203.6251 | 319.3876 |
| 200.1824 | 1147.085 | 1018.003 | 43969.35 | 510.7435 | 7260.317 | 932.4285 | 2566.494 | 203.6348 | 319.3973 |
| 200.2358 | 1147.089 | 1018.173 | 43970.22 | 510.7458 | 7260.359 | 932.4328 | 2566.61  | 203.6402 | 319.4026 |
| 200.3007 | 1147.099 | 1018.121 | 43971.28 | 510.7498 | 7260.416 | 932.4401 | 2566.751 | 203.6412 | 319.4036 |
| 200.3742 | 1147.117 | 1017.707 | 43972.48 | 510.756  | 7260.489 | 932.451  | 2566.91  | 203.6346 | 319.397  |
| 200.4411 | 1147.135 | 1017.264 | 43973.57 | 510.7618 | 7260.558 | 932.4615 | 2567.054 | 203.6271 | 319.3896 |
| 200.4952 | 1147.132 | 1017.816 | 43974.44 | 510.7624 | 7260.59  | 932.4629 | 2567.171 | 203.6408 | 319.4033 |
| 200.5454 | 1147.131 | 1018.169 | 43975.26 | 510.7637 | 7260.624 | 932.4654 | 2567.279 | 203.6502 | 319.4125 |
| 200.6041 | 1147.138 | 1018.216 | 43976.21 | 510.7668 | 7260.672 | 932.4711 | 2567.406 | 203.6531 | 319.4154 |
| 200.6752 | 1147.152 | 1018.012 | 43977.36 | 510.7718 | 7260.738 | 932.4802 | 2567.559 | 203.6509 | 319.4133 |
| 200.7476 | 1147.175 | 1017.375 | 43978.53 | 510.7789 | 7260.816 | 932.4927 | 2567.715 | 203.6394 | 319.4018 |
| 200.8074 | 1147.18  | 1017.51  | 43979.5  | 510.7817 | 7260.863 | 932.4979 | 2567.843 | 203.6442 | 319.4066 |
| 200.8576 | 1147.175 | 1018.091 | 43980.3  | 510.7819 | 7260.891 | 932.4986 | 2567.951 | 203.6585 | 319.4208 |
| 200.9106 | 1147.179 | 1018.259 | 43981.15 | 510.7841 | 7260.932 | 932.5028 | 2568.064 | 203.6639 | 319.4261 |
| 200.9761 | 1147.189 | 1018.201 | 43982.2  | 510.7881 | 7260.988 | 932.51   | 2568.204 | 203.6647 | 319.4269 |
| 201.0506 | 1147.208 | 1017.742 | 43983.4  | 510.7944 | 7261.063 | 932.5213 | 2568.364 | 203.6571 | 319.4194 |
| 201.104  | 1147.208 | 1018.107 | 43984.26 | 510.7958 | 7261.099 | 932.524  | 2568.478 | 203.6667 | 319.4289 |
| 201.1574 | 1147.212 | 1018.277 | 43985.11 | 510.798  | 7261.139 | 932.5282 | 2568.592 | 203.6721 | 319.4343 |
| 201.2223 | 1147.222 | 1018.225 | 43986.15 | 510.8019 | 7261.195 | 932.5353 | 2568.73  | 203.6731 | 319.4352 |
| 201.2958 | 1147.24  | 1017.811 | 43987.33 | 510.808  | 7261.268 | 932.5461 | 2568.887 | 203.6664 | 319.4286 |
| 201.3626 | 1147.257 | 1017.367 | 43988.4  | 510.8138 | 7261.335 | 932.5565 | 2569.03  | 203.6589 | 319.4211 |
| 201.4168 | 1147.254 | 1017.92  | 43989.25 | 510.8143 | 7261.366 | 932.5577 | 2569.145 | 203.6726 | 319.4348 |
| 201.467  | 1147.253 | 1018.273 | 43990.05 | 510.8155 | 7261.399 | 932.5602 | 2569.251 | 203.6819 | 319.444  |
| 201.5256 | 1147.26  | 1018.319 | 43990.98 | 510.8186 | 7261.447 | 932.5658 | 2569.376 | 203.6848 | 319.4468 |
| 201.5968 | 1147.274 | 1018.115 | 43992.11 | 510.8235 | 7261.512 | 932.5747 | 2569.527 | 203.6826 | 319.4446 |
| 201.6692 | 1147.296 | 1017.478 | 43993.27 | 510.8305 | 7261.589 | 932.5871 | 2569.68  | 203.671  | 319.4331 |
| 201.729  | 1147.301 | 1017.612 | 43994.21 | 510.8333 | 7261.635 | 932.5922 | 2569.807 | 203.6758 | 319.4379 |
| 201.7792 | 1147.296 | 1018.194 | 43995    | 510.8334 | 7261.662 | 932.5927 | 2569.913 | 203.69   | 319.452  |
| 201.8322 | 1147.3   | 1018.362 | 43995.84 | 510.8356 | 7261.702 | 932.5968 | 2570.025 | 203.6954 | 319.4573 |
| 201.8977 | 1147.31  | 1018.304 | 43996.87 | 510.8395 | 7261.758 | 932.604  | 2570.163 | 203.6962 | 319.4581 |
| 201.9722 | 1147.329 | 1017.844 | 43998.05 | 510.8458 | 7261.831 | 932.6151 | 2570.32  | 203.6885 | 319.4505 |

|          |          |          |          |          |          |          |          |          |          |
|----------|----------|----------|----------|----------|----------|----------|----------|----------|----------|
| 202.0255 | 1147.328 | 1018.21  | 43998.89 | 510.8471 | 7261.866 | 932.6177 | 2570.432 | 203.6981 | 319.46   |
| 202.0789 | 1147.332 | 1018.379 | 43999.72 | 510.8492 | 7261.906 | 932.6218 | 2570.545 | 203.7035 | 319.4654 |
| 202.1438 | 1147.342 | 1018.327 | 44000.74 | 510.8531 | 7261.961 | 932.6288 | 2570.681 | 203.7044 | 319.4663 |
| 202.2173 | 1147.36  | 1017.913 | 44001.9  | 510.8591 | 7262.032 | 932.6395 | 2570.836 | 203.6977 | 319.4596 |
| 202.2842 | 1147.377 | 1017.469 | 44002.95 | 510.8648 | 7262.098 | 932.6497 | 2570.976 | 203.6901 | 319.4521 |
| 202.3383 | 1147.373 | 1018.021 | 44003.79 | 510.8653 | 7262.129 | 932.6509 | 2571.089 | 203.7038 | 319.4657 |
| 202.3886 | 1147.373 | 1018.374 | 44004.57 | 510.8664 | 7262.161 | 932.6532 | 2571.194 | 203.713  | 319.4748 |
| 202.4472 | 1147.379 | 1018.42  | 44005.49 | 510.8695 | 7262.208 | 932.6587 | 2571.317 | 203.7159 | 319.4776 |
| 202.5183 | 1147.393 | 1018.216 | 44006.6  | 510.8743 | 7262.271 | 932.6675 | 2571.466 | 203.7136 | 319.4754 |
| 202.5907 | 1147.415 | 1017.578 | 44007.73 | 510.8812 | 7262.347 | 932.6797 | 2571.617 | 203.702  | 319.4639 |
| 202.6506 | 1147.42  | 1017.713 | 44008.66 | 510.8839 | 7262.392 | 932.6847 | 2571.742 | 203.7068 | 319.4686 |
| 202.7007 | 1147.415 | 1018.295 | 44009.43 | 510.884  | 7262.419 | 932.6852 | 2571.846 | 203.721  | 319.4827 |
| 202.7538 | 1147.418 | 1018.463 | 44010.25 | 510.8861 | 7262.458 | 932.6892 | 2571.956 | 203.7263 | 319.488  |
| 202.8192 | 1147.428 | 1018.404 | 44011.27 | 510.89   | 7262.512 | 932.6962 | 2572.093 | 203.727  | 319.4887 |
| 202.8937 | 1147.447 | 1017.945 | 44012.42 | 510.8962 | 7262.585 | 932.7072 | 2572.248 | 203.7193 | 319.4811 |
| 202.9471 | 1147.447 | 1018.31  | 44013.25 | 510.8974 | 7262.619 | 932.7097 | 2572.358 | 203.7289 | 319.4906 |
| 203.0005 | 1147.45  | 1018.48  | 44014.07 | 510.8995 | 7262.658 | 932.7137 | 2572.469 | 203.7343 | 319.4959 |
| 203.0654 | 1147.459 | 1018.427 | 44015.07 | 510.9033 | 7262.712 | 932.7206 | 2572.603 | 203.7351 | 319.4967 |
| 203.1389 | 1147.477 | 1018.013 | 44016.2  | 510.9092 | 7262.782 | 932.7311 | 2572.756 | 203.7284 | 319.49   |
| 203.2058 | 1147.495 | 1017.569 | 44017.23 | 510.9149 | 7262.847 | 932.7412 | 2572.894 | 203.7207 | 319.4825 |
| 203.2599 | 1147.491 | 1018.121 | 44018.06 | 510.9153 | 7262.877 | 932.7423 | 2573.005 | 203.7344 | 319.496  |
| 203.3101 | 1147.49  | 1018.474 | 44018.83 | 510.9164 | 7262.908 | 932.7445 | 2573.109 | 203.7436 | 319.5051 |
| 203.3688 | 1147.497 | 1018.52  | 44019.73 | 510.9194 | 7262.955 | 932.7499 | 2573.23  | 203.7464 | 319.5079 |
| 203.4399 | 1147.51  | 1018.316 | 44020.82 | 510.9241 | 7263.017 | 932.7586 | 2573.376 | 203.7441 | 319.5057 |
| 203.5123 | 1147.532 | 1017.678 | 44021.93 | 510.931  | 7263.091 | 932.7707 | 2573.525 | 203.7325 | 319.4941 |
| 203.5721 | 1147.537 | 1017.812 | 44022.84 | 510.9336 | 7263.136 | 932.7755 | 2573.648 | 203.7372 | 319.4988 |
| 203.6223 | 1147.532 | 1018.394 | 44023.6  | 510.9336 | 7263.161 | 932.7759 | 2573.751 | 203.7514 | 319.5128 |
| 203.6753 | 1147.535 | 1018.562 | 44024.4  | 510.9357 | 7263.2   | 932.7798 | 2573.86  | 203.7567 | 319.5181 |
| 203.7408 | 1147.544 | 1018.503 | 44025.4  | 510.9395 | 7263.253 | 932.7867 | 2573.994 | 203.7574 | 319.5188 |
| 203.8153 | 1147.563 | 1018.043 | 44026.53 | 510.9456 | 7263.325 | 932.7976 | 2574.147 | 203.7496 | 319.5111 |
| 203.8687 | 1147.563 | 1018.408 | 44027.34 | 510.9468 | 7263.358 | 932.8    | 2574.256 | 203.7592 | 319.5205 |
| 203.9221 | 1147.566 | 1018.578 | 44028.15 | 510.9489 | 7263.396 | 932.8039 | 2574.365 | 203.7645 | 319.5258 |
| 203.987  | 1147.575 | 1018.525 | 44029.13 | 510.9526 | 7263.449 | 932.8107 | 2574.497 | 203.7653 | 319.5266 |
| 204.0605 | 1147.593 | 1018.111 | 44030.24 | 510.9584 | 7263.518 | 932.8211 | 2574.647 | 203.7585 | 319.5199 |

|          |          |          |          |          |          |          |          |          |          |
|----------|----------|----------|----------|----------|----------|----------|----------|----------|----------|
| 204.1273 | 1147.61  | 1017.666 | 44031.25 | 510.9641 | 7263.582 | 932.831  | 2574.783 | 203.7508 | 319.5123 |
| 204.1814 | 1147.606 | 1018.219 | 44032.07 | 510.9644 | 7263.611 | 932.832  | 2574.893 | 203.7645 | 319.5258 |
| 204.2317 | 1147.605 | 1018.571 | 44032.82 | 510.9654 | 7263.642 | 932.8341 | 2574.995 | 203.7736 | 319.5349 |
| 204.2903 | 1147.612 | 1018.618 | 44033.7  | 510.9683 | 7263.687 | 932.8395 | 2575.114 | 203.7764 | 319.5376 |
| 204.3615 | 1147.625 | 1018.413 | 44034.77 | 510.9731 | 7263.749 | 932.848  | 2575.259 | 203.7741 | 319.5353 |
| 204.4339 | 1147.646 | 1017.775 | 44035.86 | 510.9798 | 7263.822 | 932.86   | 2575.406 | 203.7623 | 319.5237 |
| 204.4937 | 1147.651 | 1017.909 | 44036.75 | 510.9824 | 7263.866 | 932.8647 | 2575.527 | 203.7671 | 319.5284 |
| 204.5439 | 1147.646 | 1018.491 | 44037.5  | 510.9824 | 7263.89  | 932.865  | 2575.628 | 203.7812 | 319.5424 |
| 204.5969 | 1147.649 | 1018.659 | 44038.29 | 510.9844 | 7263.928 | 932.8688 | 2575.735 | 203.7864 | 319.5476 |
| 204.6624 | 1147.659 | 1018.6   | 44039.27 | 510.9881 | 7263.981 | 932.8756 | 2575.867 | 203.7871 | 319.5482 |
| 204.7368 | 1147.677 | 1018.14  | 44040.38 | 510.9942 | 7264.051 | 932.8863 | 2576.018 | 203.7793 | 319.5405 |
| 204.7902 | 1147.676 | 1018.505 | 44041.17 | 510.9953 | 7264.083 | 932.8886 | 2576.125 | 203.7888 | 319.55   |
| 204.8436 | 1147.68  | 1018.674 | 44041.97 | 510.9973 | 7264.121 | 932.8924 | 2576.233 | 203.7941 | 319.5552 |
| 204.9085 | 1147.689 | 1018.622 | 44042.93 | 511.001  | 7264.173 | 932.8991 | 2576.363 | 203.7949 | 319.556  |
| 204.982  | 1147.706 | 1018.207 | 44044.02 | 511.0067 | 7264.241 | 932.9093 | 2576.511 | 203.788  | 319.5492 |
| 205.0489 | 1147.723 | 1017.762 | 44045.02 | 511.0123 | 7264.304 | 932.9192 | 2576.645 | 203.7803 | 319.5415 |
| 205.103  | 1147.719 | 1018.315 | 44045.81 | 511.0126 | 7264.332 | 932.9201 | 2576.753 | 203.7939 | 319.555  |
| 205.1533 | 1147.718 | 1018.667 | 44046.55 | 511.0136 | 7264.362 | 932.9221 | 2576.854 | 203.8031 | 319.5641 |
| 205.2119 | 1147.724 | 1018.713 | 44047.42 | 511.0164 | 7264.407 | 932.9273 | 2576.971 | 203.8058 | 319.5668 |
| 205.283  | 1147.737 | 1018.509 | 44048.47 | 511.0211 | 7264.467 | 932.9357 | 2577.113 | 203.8035 | 319.5644 |
| 205.3554 | 1147.759 | 1017.87  | 44049.54 | 511.0278 | 7264.539 | 932.9476 | 2577.258 | 203.7917 | 319.5528 |
| 205.4152 | 1147.764 | 1018.005 | 44050.41 | 511.0303 | 7264.582 | 932.9522 | 2577.377 | 203.7964 | 319.5574 |
| 205.4654 | 1147.758 | 1018.586 | 44051.15 | 511.0302 | 7264.606 | 932.9524 | 2577.477 | 203.8105 | 319.5714 |
| 205.5185 | 1147.761 | 1018.754 | 44051.92 | 511.0322 | 7264.643 | 932.9561 | 2577.583 | 203.8157 | 319.5766 |
| 205.5839 | 1147.771 | 1018.695 | 44052.88 | 511.0358 | 7264.695 | 932.9628 | 2577.713 | 203.8163 | 319.5772 |
| 205.6584 | 1147.789 | 1018.235 | 44053.97 | 511.0418 | 7264.764 | 932.9734 | 2577.861 | 203.8085 | 319.5694 |
| 205.7118 | 1147.788 | 1018.6   | 44054.75 | 511.0429 | 7264.795 | 932.9756 | 2577.967 | 203.818  | 319.5788 |
| 205.7652 | 1147.791 | 1018.769 | 44055.53 | 511.0449 | 7264.832 | 932.9793 | 2578.073 | 203.8232 | 319.584  |
| 205.8301 | 1147.8   | 1018.716 | 44056.48 | 511.0485 | 7264.883 | 932.9859 | 2578.202 | 203.8239 | 319.5848 |
| 205.9036 | 1147.817 | 1018.301 | 44057.55 | 511.0542 | 7264.95  | 932.996  | 2578.347 | 203.817  | 319.5779 |
| 205.9705 | 1147.835 | 1017.857 | 44058.52 | 511.0596 | 7265.012 | 933.0057 | 2578.479 | 203.8093 | 319.5702 |
| 206.0246 | 1147.83  | 1018.409 | 44059.3  | 511.0599 | 7265.04  | 933.0065 | 2578.586 | 203.8229 | 319.5837 |
| 206.0748 | 1147.829 | 1018.761 | 44060.03 | 511.0608 | 7265.069 | 933.0085 | 2578.685 | 203.832  | 319.5928 |
| 206.1335 | 1147.835 | 1018.807 | 44060.88 | 511.0636 | 7265.113 | 933.0136 | 2578.801 | 203.8347 | 319.5954 |

|          |          |          |          |          |          |          |          |          |          |
|----------|----------|----------|----------|----------|----------|----------|----------|----------|----------|
| 206.2046 | 1147.848 | 1018.603 | 44061.91 | 511.0682 | 7265.172 | 933.0218 | 2578.941 | 203.8323 | 319.593  |
| 206.277  | 1147.869 | 1017.964 | 44062.96 | 511.0748 | 7265.243 | 933.0336 | 2579.084 | 203.8205 | 319.5813 |
| 206.3368 | 1147.874 | 1018.098 | 44063.82 | 511.0773 | 7265.285 | 933.0381 | 2579.201 | 203.8251 | 319.5859 |
| 206.387  | 1147.868 | 1018.68  | 44064.54 | 511.0772 | 7265.308 | 933.0382 | 2579.299 | 203.8392 | 319.5999 |
| 206.44   | 1147.871 | 1018.847 | 44065.3  | 511.0791 | 7265.344 | 933.0419 | 2579.403 | 203.8444 | 319.605  |
| 206.5055 | 1147.88  | 1018.788 | 44066.24 | 511.0827 | 7265.395 | 933.0484 | 2579.532 | 203.845  | 319.6056 |
| 206.58   | 1147.899 | 1018.328 | 44067.32 | 511.0886 | 7265.463 | 933.0589 | 2579.678 | 203.8371 | 319.5978 |
| 206.6334 | 1147.898 | 1018.693 | 44068.08 | 511.0896 | 7265.494 | 933.061  | 2579.782 | 203.8466 | 319.6072 |
| 206.6868 | 1147.901 | 1018.862 | 44068.84 | 511.0915 | 7265.53  | 933.0646 | 2579.886 | 203.8518 | 319.6123 |
| 206.7516 | 1147.91  | 1018.809 | 44069.77 | 511.0951 | 7265.58  | 933.071  | 2580.013 | 203.8525 | 319.613  |
| 206.8252 | 1147.927 | 1018.394 | 44070.82 | 511.1007 | 7265.646 | 933.0811 | 2580.156 | 203.8455 | 319.6061 |
| 206.892  | 1147.944 | 1017.949 | 44071.78 | 511.1061 | 7265.708 | 933.0907 | 2580.287 | 203.8377 | 319.5984 |
| 206.9461 | 1147.939 | 1018.501 | 44072.55 | 511.1063 | 7265.734 | 933.0914 | 2580.392 | 203.8513 | 319.6119 |
| 206.9964 | 1147.938 | 1018.854 | 44073.26 | 511.1072 | 7265.763 | 933.0932 | 2580.489 | 203.8604 | 319.6209 |
| 207.055  | 1147.944 | 1018.9   | 44074.09 | 511.1099 | 7265.806 | 933.0983 | 2580.603 | 203.8631 | 319.6235 |
| 207.1262 | 1147.957 | 1018.695 | 44075.1  | 511.1145 | 7265.864 | 933.1064 | 2580.741 | 203.8606 | 319.6211 |
| 207.1986 | 1147.978 | 1018.056 | 44076.14 | 511.121  | 7265.934 | 933.118  | 2580.882 | 203.8487 | 319.6093 |
| 207.2584 | 1147.982 | 1018.19  | 44076.98 | 511.1234 | 7265.975 | 933.1224 | 2580.998 | 203.8534 | 319.6139 |
| 207.3085 | 1147.977 | 1018.772 | 44077.69 | 511.1232 | 7265.998 | 933.1225 | 2581.095 | 203.8674 | 319.6279 |
| 207.3616 | 1147.98  | 1018.939 | 44078.43 | 511.1251 | 7266.033 | 933.126  | 2581.197 | 203.8726 | 319.6329 |
| 207.4271 | 1147.988 | 1018.88  | 44079.36 | 511.1287 | 7266.083 | 933.1324 | 2581.323 | 203.8731 | 319.6335 |
| 207.5015 | 1148.006 | 1018.419 | 44080.41 | 511.1345 | 7266.15  | 933.1428 | 2581.467 | 203.8652 | 319.6256 |
| 207.5549 | 1148.005 | 1018.784 | 44081.16 | 511.1355 | 7266.18  | 933.1448 | 2581.57  | 203.8746 | 319.635  |
| 207.6083 | 1148.008 | 1018.953 | 44081.91 | 511.1373 | 7266.215 | 933.1483 | 2581.673 | 203.8798 | 319.6401 |
| 207.6732 | 1148.017 | 1018.9   | 44082.82 | 511.1408 | 7266.265 | 933.1546 | 2581.798 | 203.8805 | 319.6408 |
| 207.7467 | 1148.034 | 1018.485 | 44083.85 | 511.1464 | 7266.33  | 933.1645 | 2581.939 | 203.8735 | 319.6338 |
| 207.8136 | 1148.051 | 1018.04  | 44084.79 | 511.1517 | 7266.39  | 933.1741 | 2582.067 | 203.8657 | 319.6261 |
| 207.8677 | 1148.046 | 1018.592 | 44085.55 | 511.1519 | 7266.416 | 933.1746 | 2582.171 | 203.8792 | 319.6395 |
| 207.918  | 1148.045 | 1018.945 | 44086.25 | 511.1527 | 7266.444 | 933.1764 | 2582.267 | 203.8883 | 319.6485 |
| 207.9766 | 1148.051 | 1018.99  | 44087.06 | 511.1554 | 7266.486 | 933.1814 | 2582.379 | 203.8909 | 319.6511 |
| 208.0477 | 1148.063 | 1018.785 | 44088.06 | 511.1599 | 7266.543 | 933.1894 | 2582.515 | 203.8884 | 319.6486 |
| 208.1201 | 1148.084 | 1018.146 | 44089.07 | 511.1664 | 7266.612 | 933.2009 | 2582.654 | 203.8765 | 319.6368 |
| 208.1799 | 1148.089 | 1018.28  | 44089.9  | 511.1687 | 7266.653 | 933.2052 | 2582.768 | 203.8811 | 319.6414 |
| 208.2301 | 1148.083 | 1018.862 | 44090.59 | 511.1685 | 7266.675 | 933.2051 | 2582.863 | 203.8951 | 319.6553 |

|          |          |          |          |          |          |          |          |          |          |
|----------|----------|----------|----------|----------|----------|----------|----------|----------|----------|
| 208.2832 | 1148.086 | 1019.029 | 44091.32 | 511.1703 | 7266.709 | 933.2086 | 2582.964 | 203.9002 | 319.6604 |
| 208.3486 | 1148.094 | 1018.97  | 44092.23 | 511.1738 | 7266.758 | 933.2149 | 2583.089 | 203.9007 | 319.6609 |
| 208.4231 | 1148.112 | 1018.509 | 44093.27 | 511.1796 | 7266.824 | 933.2252 | 2583.231 | 203.8928 | 319.653  |
| 208.4765 | 1148.111 | 1018.874 | 44094    | 511.1805 | 7266.854 | 933.2271 | 2583.332 | 203.9022 | 319.6623 |
| 208.5299 | 1148.114 | 1019.043 | 44094.74 | 511.1823 | 7266.888 | 933.2305 | 2583.433 | 203.9073 | 319.6674 |
| 208.5948 | 1148.122 | 1018.99  | 44095.63 | 511.1857 | 7266.937 | 933.2367 | 2583.556 | 203.9079 | 319.668  |
| 208.6683 | 1148.139 | 1018.574 | 44096.64 | 511.1912 | 7267     | 933.2465 | 2583.695 | 203.9009 | 319.661  |
| 208.7352 | 1148.156 | 1018.129 | 44097.57 | 511.1965 | 7267.06  | 933.2559 | 2583.822 | 203.8931 | 319.6533 |
| 208.7893 | 1148.151 | 1018.681 | 44098.31 | 511.1966 | 7267.085 | 933.2564 | 2583.924 | 203.9066 | 319.6666 |
| 208.8395 | 1148.15  | 1019.034 | 44098.99 | 511.1974 | 7267.112 | 933.2581 | 2584.019 | 203.9156 | 319.6756 |
| 208.8982 | 1148.155 | 1019.079 | 44099.79 | 511.2    | 7267.153 | 933.2629 | 2584.129 | 203.9182 | 319.6782 |
| 208.9693 | 1148.168 | 1018.874 | 44100.77 | 511.2044 | 7267.21  | 933.2708 | 2584.263 | 203.9157 | 319.6757 |
| 209.0417 | 1148.189 | 1018.235 | 44101.76 | 511.2109 | 7267.278 | 933.2822 | 2584.4   | 203.9037 | 319.6638 |
| 209.1015 | 1148.193 | 1018.369 | 44102.58 | 511.2131 | 7267.318 | 933.2864 | 2584.512 | 203.9083 | 319.6683 |
| 209.1517 | 1148.187 | 1018.95  | 44103.26 | 511.2129 | 7267.339 | 933.2863 | 2584.606 | 203.9223 | 319.6822 |
| 209.2047 | 1148.19  | 1019.117 | 44103.98 | 511.2147 | 7267.373 | 933.2897 | 2584.705 | 203.9274 | 319.6873 |
| 209.2702 | 1148.198 | 1019.058 | 44104.87 | 511.2181 | 7267.421 | 933.2959 | 2584.828 | 203.9278 | 319.6877 |
| 209.3447 | 1148.216 | 1018.597 | 44105.88 | 511.2238 | 7267.486 | 933.306  | 2584.968 | 203.9198 | 319.6798 |
| 209.3981 | 1148.215 | 1018.962 | 44106.6  | 511.2247 | 7267.515 | 933.3078 | 2585.068 | 203.9292 | 319.6891 |
| 209.4515 | 1148.217 | 1019.131 | 44107.32 | 511.2264 | 7267.548 | 933.3112 | 2585.167 | 203.9343 | 319.6942 |
| 209.5163 | 1148.226 | 1019.078 | 44108.2  | 511.2298 | 7267.596 | 933.3173 | 2585.288 | 203.9349 | 319.6947 |
| 209.5899 | 1148.242 | 1018.662 | 44109.2  | 511.2352 | 7267.659 | 933.3269 | 2585.426 | 203.9279 | 319.6877 |
| 209.6567 | 1148.259 | 1018.217 | 44110.1  | 511.2405 | 7267.717 | 933.3362 | 2585.55  | 203.92   | 319.6799 |
| 209.7108 | 1148.254 | 1018.769 | 44110.83 | 511.2405 | 7267.742 | 933.3366 | 2585.651 | 203.9334 | 319.6933 |
| 209.7611 | 1148.253 | 1019.121 | 44111.5  | 511.2413 | 7267.768 | 933.3382 | 2585.744 | 203.9424 | 319.7022 |
| 209.8197 | 1148.258 | 1019.167 | 44112.29 | 511.2438 | 7267.809 | 933.343  | 2585.853 | 203.945  | 319.7047 |
| 209.8909 | 1148.27  | 1018.961 | 44113.25 | 511.2482 | 7267.864 | 933.3508 | 2585.985 | 203.9424 | 319.7022 |
| 209.9632 | 1148.291 | 1018.322 | 44114.22 | 511.2545 | 7267.931 | 933.362  | 2586.12  | 203.9305 | 319.6903 |
| 210.0231 | 1148.295 | 1018.456 | 44115.02 | 511.2568 | 7267.97  | 933.3661 | 2586.23  | 203.935  | 319.6948 |
| 210.0732 | 1148.289 | 1019.037 | 44115.69 | 511.2565 | 7267.991 | 933.3659 | 2586.323 | 203.949  | 319.7087 |
| 210.1263 | 1148.292 | 1019.204 | 44116.39 | 511.2582 | 7268.024 | 933.3692 | 2586.421 | 203.954  | 319.7137 |
| 210.1918 | 1148.3   | 1019.145 | 44117.27 | 511.2616 | 7268.071 | 933.3753 | 2586.542 | 203.9545 | 319.7141 |
| 210.2662 | 1148.318 | 1018.683 | 44118.26 | 511.2672 | 7268.135 | 933.3853 | 2586.679 | 203.9464 | 319.7061 |
| 210.3196 | 1148.317 | 1019.048 | 44118.97 | 511.268  | 7268.163 | 933.3871 | 2586.778 | 203.9558 | 319.7154 |

|          |          |          |          |          |          |          |          |          |          |
|----------|----------|----------|----------|----------|----------|----------|----------|----------|----------|
| 210.373  | 1148.319 | 1019.217 | 44119.68 | 511.2698 | 7268.196 | 933.3903 | 2586.876 | 203.9608 | 319.7204 |
| 210.4379 | 1148.327 | 1019.164 | 44120.54 | 511.273  | 7268.243 | 933.3963 | 2586.995 | 203.9614 | 319.721  |
| 210.5114 | 1148.344 | 1018.748 | 44121.52 | 511.2784 | 7268.305 | 933.4059 | 2587.13  | 203.9543 | 319.7139 |
| 210.5783 | 1148.36  | 1018.303 | 44122.41 | 511.2836 | 7268.363 | 933.4151 | 2587.253 | 203.9464 | 319.7061 |
| 210.6324 | 1148.355 | 1018.855 | 44123.12 | 511.2836 | 7268.386 | 933.4154 | 2587.352 | 203.9598 | 319.7194 |
| 210.6827 | 1148.354 | 1019.207 | 44123.78 | 511.2843 | 7268.412 | 933.4169 | 2587.444 | 203.9688 | 319.7283 |
| 210.7413 | 1148.359 | 1019.252 | 44124.55 | 511.2868 | 7268.452 | 933.4216 | 2587.552 | 203.9713 | 319.7308 |
| 210.8124 | 1148.371 | 1019.047 | 44125.49 | 511.2911 | 7268.506 | 933.4292 | 2587.682 | 203.9687 | 319.7282 |
| 210.8848 | 1148.392 | 1018.407 | 44126.45 | 511.2974 | 7268.573 | 933.4404 | 2587.814 | 203.9567 | 319.7163 |
| 210.9446 | 1148.396 | 1018.541 | 44127.24 | 511.2996 | 7268.611 | 933.4444 | 2587.923 | 203.9612 | 319.7208 |
| 210.9948 | 1148.39  | 1019.122 | 44127.89 | 511.2992 | 7268.631 | 933.4441 | 2588.014 | 203.9751 | 319.7346 |
| 211.0478 | 1148.392 | 1019.289 | 44128.58 | 511.3009 | 7268.663 | 933.4473 | 2588.111 | 203.9802 | 319.7396 |
| 211.1133 | 1148.401 | 1019.23  | 44129.44 | 511.3042 | 7268.71  | 933.4533 | 2588.23  | 203.9806 | 319.74   |
| 211.1878 | 1148.418 | 1018.768 | 44130.42 | 511.3098 | 7268.773 | 933.4632 | 2588.366 | 203.9725 | 319.732  |
| 211.2412 | 1148.416 | 1019.133 | 44131.11 | 511.3106 | 7268.8   | 933.4649 | 2588.462 | 203.9818 | 319.7412 |
| 211.2946 | 1148.419 | 1019.302 | 44131.81 | 511.3123 | 7268.832 | 933.468  | 2588.559 | 203.9869 | 319.7462 |
| 211.3595 | 1148.427 | 1019.248 | 44132.65 | 511.3155 | 7268.878 | 933.4739 | 2588.677 | 203.9874 | 319.7467 |
| 211.433  | 1148.443 | 1018.832 | 44133.61 | 511.3208 | 7268.939 | 933.4834 | 2588.81  | 203.9802 | 319.7397 |
| 211.4999 | 1148.46  | 1018.387 | 44134.49 | 511.3259 | 7268.996 | 933.4924 | 2588.931 | 203.9723 | 319.7318 |
| 211.554  | 1148.454 | 1018.939 | 44135.18 | 511.3259 | 7269.019 | 933.4927 | 2589.029 | 203.9857 | 319.7451 |
| 211.6042 | 1148.453 | 1019.291 | 44135.83 | 511.3266 | 7269.045 | 933.4941 | 2589.119 | 203.9946 | 319.7539 |
| 211.6629 | 1148.458 | 1019.336 | 44136.59 | 511.329  | 7269.083 | 933.4987 | 2589.225 | 203.9971 | 319.7564 |
| 211.734  | 1148.47  | 1019.131 | 44137.51 | 511.3332 | 7269.137 | 933.5062 | 2589.353 | 203.9945 | 319.7538 |
| 211.8064 | 1148.491 | 1018.491 | 44138.45 | 511.3395 | 7269.202 | 933.5173 | 2589.484 | 203.9824 | 319.7418 |
| 211.8662 | 1148.495 | 1018.625 | 44139.22 | 511.3416 | 7269.24  | 933.5212 | 2589.591 | 203.9869 | 319.7463 |
| 211.9164 | 1148.488 | 1019.206 | 44139.87 | 511.3412 | 7269.259 | 933.5209 | 2589.681 | 204.0008 | 319.7601 |
| 211.9694 | 1148.491 | 1019.373 | 44140.55 | 511.3429 | 7269.291 | 933.524  | 2589.776 | 204.0058 | 319.765  |
| 212.0349 | 1148.499 | 1019.313 | 44141.39 | 511.3461 | 7269.336 | 933.5299 | 2589.894 | 204.0062 | 319.7654 |
| 212.1094 | 1148.516 | 1018.852 | 44142.35 | 511.3516 | 7269.398 | 933.5396 | 2590.027 | 203.9981 | 319.7573 |
| 212.1628 | 1148.515 | 1019.216 | 44143.03 | 511.3524 | 7269.425 | 933.5412 | 2590.122 | 204.0074 | 319.7666 |
| 212.2162 | 1148.517 | 1019.385 | 44143.71 | 511.354  | 7269.457 | 933.5443 | 2590.218 | 204.0124 | 319.7715 |
| 212.281  | 1148.525 | 1019.332 | 44144.54 | 511.3572 | 7269.502 | 933.5501 | 2590.334 | 204.0129 | 319.772  |
| 212.3546 | 1148.541 | 1018.915 | 44145.49 | 511.3624 | 7269.562 | 933.5594 | 2590.465 | 204.0057 | 319.7649 |
| 212.4214 | 1148.557 | 1018.47  | 44146.34 | 511.3675 | 7269.618 | 933.5684 | 2590.584 | 203.9977 | 319.757  |

|          |          |          |          |          |          |          |          |          |          |
|----------|----------|----------|----------|----------|----------|----------|----------|----------|----------|
| 212.4755 | 1148.552 | 1019.022 | 44147.03 | 511.3674 | 7269.64  | 933.5686 | 2590.68  | 204.0111 | 319.7702 |
| 212.5258 | 1148.55  | 1019.374 | 44147.66 | 511.368  | 7269.665 | 933.5699 | 2590.77  | 204.02   | 319.7791 |
| 212.5844 | 1148.556 | 1019.419 | 44148.41 | 511.3705 | 7269.703 | 933.5744 | 2590.874 | 204.0225 | 319.7815 |
| 212.6556 | 1148.567 | 1019.213 | 44149.31 | 511.3746 | 7269.756 | 933.5818 | 2591     | 204.0198 | 319.7789 |
| 212.7279 | 1148.588 | 1018.573 | 44150.24 | 511.3808 | 7269.82  | 933.5928 | 2591.129 | 204.0077 | 319.7669 |
| 212.7878 | 1148.591 | 1018.707 | 44150.99 | 511.3829 | 7269.857 | 933.5966 | 2591.234 | 204.0121 | 319.7713 |
| 212.8379 | 1148.585 | 1019.288 | 44151.62 | 511.3824 | 7269.875 | 933.5962 | 2591.323 | 204.026  | 319.7851 |
| 212.891  | 1148.587 | 1019.455 | 44152.29 | 511.384  | 7269.906 | 933.5992 | 2591.417 | 204.031  | 319.79   |
| 212.9564 | 1148.595 | 1019.395 | 44153.12 | 511.3872 | 7269.951 | 933.605  | 2591.532 | 204.0314 | 319.7903 |
| 213.0309 | 1148.613 | 1018.933 | 44154.06 | 511.3927 | 7270.012 | 933.6147 | 2591.664 | 204.0232 | 319.7822 |
| 213.0843 | 1148.611 | 1019.298 | 44154.73 | 511.3934 | 7270.039 | 933.6162 | 2591.758 | 204.0325 | 319.7914 |
| 213.1377 | 1148.613 | 1019.467 | 44155.4  | 511.395  | 7270.07  | 933.6192 | 2591.852 | 204.0375 | 319.7964 |
| 213.2026 | 1148.621 | 1019.413 | 44156.21 | 511.3981 | 7270.114 | 933.6249 | 2591.966 | 204.0379 | 319.7968 |
| 213.2761 | 1148.637 | 1018.997 | 44157.14 | 511.4033 | 7270.173 | 933.6341 | 2592.095 | 204.0307 | 319.7897 |
| 213.343  | 1148.653 | 1018.551 | 44157.98 | 511.4083 | 7270.228 | 933.643  | 2592.213 | 204.0227 | 319.7817 |
| 213.3971 | 1148.648 | 1019.103 | 44158.65 | 511.4081 | 7270.25  | 933.643  | 2592.307 | 204.036  | 319.795  |
| 213.4473 | 1148.646 | 1019.455 | 44159.28 | 511.4087 | 7270.274 | 933.6443 | 2592.395 | 204.0449 | 319.8038 |
| 213.506  | 1148.651 | 1019.5   | 44160.01 | 511.4111 | 7270.311 | 933.6487 | 2592.498 | 204.0474 | 319.8062 |
| 213.5771 | 1148.663 | 1019.294 | 44160.89 | 511.4152 | 7270.363 | 933.656  | 2592.622 | 204.0447 | 319.8035 |
| 213.6495 | 1148.683 | 1018.654 | 44161.8  | 511.4213 | 7270.427 | 933.6669 | 2592.749 | 204.0325 | 319.7915 |
| 213.7093 | 1148.686 | 1018.787 | 44162.54 | 511.4234 | 7270.463 | 933.6706 | 2592.853 | 204.0369 | 319.7958 |
| 213.7595 | 1148.68  | 1019.369 | 44163.16 | 511.4229 | 7270.481 | 933.6701 | 2592.941 | 204.0508 | 319.8096 |
| 213.8125 | 1148.682 | 1019.535 | 44163.82 | 511.4244 | 7270.511 | 933.6731 | 2593.033 | 204.0557 | 319.8145 |
| 213.878  | 1148.69  | 1019.475 | 44164.63 | 511.4276 | 7270.555 | 933.6788 | 2593.147 | 204.0561 | 319.8148 |
| 213.9525 | 1148.707 | 1019.014 | 44165.55 | 511.433  | 7270.615 | 933.6883 | 2593.276 | 204.0478 | 319.8067 |
| 214.0059 | 1148.705 | 1019.378 | 44166.21 | 511.4336 | 7270.641 | 933.6897 | 2593.369 | 204.0571 | 319.8158 |
| 214.0593 | 1148.707 | 1019.547 | 44166.87 | 511.4352 | 7270.671 | 933.6927 | 2593.462 | 204.0621 | 319.8208 |
| 214.1242 | 1148.715 | 1019.493 | 44167.67 | 511.4382 | 7270.715 | 933.6983 | 2593.574 | 204.0625 | 319.8212 |
| 214.1977 | 1148.731 | 1019.077 | 44168.57 | 511.4434 | 7270.773 | 933.7074 | 2593.701 | 204.0552 | 319.814  |
| 214.2646 | 1148.747 | 1018.631 | 44169.4  | 511.4483 | 7270.827 | 933.7161 | 2593.817 | 204.0472 | 319.806  |
| 214.3187 | 1148.741 | 1019.182 | 44170.06 | 511.4481 | 7270.848 | 933.7161 | 2593.911 | 204.0605 | 319.8192 |
| 214.3689 | 1148.74  | 1019.534 | 44170.67 | 511.4487 | 7270.872 | 933.7174 | 2593.997 | 204.0694 | 319.828  |
| 214.4276 | 1148.745 | 1019.579 | 44171.39 | 511.451  | 7270.908 | 933.7216 | 2594.098 | 204.0718 | 319.8304 |
| 214.4987 | 1148.756 | 1019.373 | 44172.26 | 511.4551 | 7270.959 | 933.7289 | 2594.221 | 204.0691 | 319.8277 |

|          |          |          |          |          |          |          |          |          |          |
|----------|----------|----------|----------|----------|----------|----------|----------|----------|----------|
| 214.5711 | 1148.776 | 1018.733 | 44173.15 | 511.4611 | 7271.022 | 933.7396 | 2594.346 | 204.0569 | 319.8156 |
| 214.6309 | 1148.78  | 1018.867 | 44173.88 | 511.4631 | 7271.057 | 933.7433 | 2594.448 | 204.0612 | 319.8199 |
| 214.6811 | 1148.773 | 1019.448 | 44174.49 | 511.4626 | 7271.075 | 933.7427 | 2594.534 | 204.0751 | 319.8337 |
| 214.7341 | 1148.775 | 1019.614 | 44175.13 | 511.4641 | 7271.104 | 933.7455 | 2594.625 | 204.08   | 319.8386 |
| 214.7996 | 1148.783 | 1019.554 | 44175.93 | 511.4672 | 7271.148 | 933.7512 | 2594.738 | 204.0803 | 319.8388 |
| 214.8741 | 1148.8   | 1019.092 | 44176.83 | 511.4725 | 7271.207 | 933.7606 | 2594.865 | 204.072  | 319.8307 |
| 214.9275 | 1148.798 | 1019.457 | 44177.48 | 511.4731 | 7271.232 | 933.7619 | 2594.956 | 204.0813 | 319.8398 |
| 214.9808 | 1148.8   | 1019.626 | 44178.12 | 511.4746 | 7271.262 | 933.7648 | 2595.048 | 204.0862 | 319.8447 |
| 215.0457 | 1148.808 | 1019.572 | 44178.91 | 511.4777 | 7271.304 | 933.7703 | 2595.158 | 204.0866 | 319.8451 |
| 215.1193 | 1148.824 | 1019.155 | 44179.8  | 511.4827 | 7271.361 | 933.7793 | 2595.284 | 204.0793 | 319.8379 |
| 215.1861 | 1148.839 | 1018.709 | 44180.61 | 511.4876 | 7271.415 | 933.788  | 2595.398 | 204.0712 | 319.8298 |
| 215.2402 | 1148.834 | 1019.261 | 44181.26 | 511.4874 | 7271.436 | 933.7879 | 2595.49  | 204.0845 | 319.843  |
| 215.2905 | 1148.832 | 1019.612 | 44181.86 | 511.4879 | 7271.458 | 933.789  | 2595.575 | 204.0934 | 319.8518 |
| 215.3491 | 1148.837 | 1019.657 | 44182.56 | 511.4902 | 7271.494 | 933.7932 | 2595.675 | 204.0958 | 319.8542 |
| 215.4203 | 1148.848 | 1019.451 | 44183.42 | 511.4942 | 7271.545 | 933.8004 | 2595.796 | 204.093  | 319.8514 |
| 215.4926 | 1148.868 | 1018.811 | 44184.29 | 511.5002 | 7271.606 | 933.811  | 2595.918 | 204.0808 | 319.8393 |
| 215.5525 | 1148.871 | 1018.944 | 44185.01 | 511.5021 | 7271.641 | 933.8146 | 2596.02  | 204.0851 | 319.8436 |
| 215.6026 | 1148.865 | 1019.525 | 44185.6  | 511.5016 | 7271.658 | 933.8139 | 2596.104 | 204.099  | 319.8573 |
| 215.6557 | 1148.867 | 1019.692 | 44186.23 | 511.503  | 7271.687 | 933.8167 | 2596.194 | 204.1038 | 319.8622 |
| 215.7211 | 1148.874 | 1019.632 | 44187.02 | 511.5061 | 7271.729 | 933.8222 | 2596.305 | 204.1041 | 319.8624 |
| 215.7956 | 1148.891 | 1019.17  | 44187.91 | 511.5113 | 7271.788 | 933.8315 | 2596.43  | 204.0958 | 319.8542 |
| 215.849  | 1148.889 | 1019.534 | 44188.54 | 511.5119 | 7271.812 | 933.8328 | 2596.52  | 204.105  | 319.8633 |
| 215.9024 | 1148.891 | 1019.703 | 44189.17 | 511.5134 | 7271.841 | 933.8356 | 2596.61  | 204.1099 | 319.8682 |
| 215.9673 | 1148.899 | 1019.649 | 44189.94 | 511.5163 | 7271.883 | 933.841  | 2596.719 | 204.1103 | 319.8686 |
| 216.0408 | 1148.914 | 1019.232 | 44190.82 | 511.5214 | 7271.939 | 933.8499 | 2596.843 | 204.103  | 319.8613 |
| 216.1077 | 1148.93  | 1018.786 | 44191.61 | 511.5262 | 7271.992 | 933.8585 | 2596.955 | 204.0948 | 319.8532 |
| 216.1618 | 1148.924 | 1019.337 | 44192.25 | 511.5259 | 7272.012 | 933.8583 | 2597.046 | 204.1081 | 319.8664 |
| 216.212  | 1148.922 | 1019.689 | 44192.84 | 511.5264 | 7272.034 | 933.8594 | 2597.13  | 204.117  | 319.8752 |
| 216.2707 | 1148.927 | 1019.734 | 44193.53 | 511.5286 | 7272.07  | 933.8635 | 2597.228 | 204.1193 | 319.8775 |
| 216.3418 | 1148.938 | 1019.528 | 44194.37 | 511.5326 | 7272.119 | 933.8705 | 2597.347 | 204.1165 | 319.8747 |
| 216.4142 | 1148.958 | 1018.887 | 44195.23 | 511.5385 | 7272.18  | 933.881  | 2597.468 | 204.1042 | 319.8626 |
| 216.474  | 1148.961 | 1019.021 | 44195.93 | 511.5404 | 7272.214 | 933.8845 | 2597.568 | 204.1085 | 319.8668 |
| 216.5242 | 1148.954 | 1019.602 | 44196.51 | 511.5398 | 7272.23  | 933.8838 | 2597.651 | 204.1224 | 319.8805 |
| 216.5772 | 1148.956 | 1019.768 | 44197.13 | 511.5412 | 7272.258 | 933.8865 | 2597.74  | 204.1272 | 319.8854 |



|          |          |          |          |          |          |          |          |          |          |
|----------|----------|----------|----------|----------|----------|----------|----------|----------|----------|
| 216.6427 | 1148.964 | 1019.708 | 44197.9  | 511.5442 | 7272.3   | 933.892  | 2597.848 | 204.1274 | 319.8856 |
| 216.7172 | 1148.981 | 1019.246 | 44198.78 | 511.5494 | 7272.358 | 933.9012 | 2597.972 | 204.1191 | 319.8773 |
| 216.7706 | 1148.978 | 1019.61  | 44199.4  | 511.55   | 7272.381 | 933.9024 | 2598.061 | 204.1283 | 319.8864 |
| 216.824  | 1148.98  | 1019.779 | 44200.02 | 511.5514 | 7272.41  | 933.9051 | 2598.149 | 204.1332 | 319.8913 |
| 216.8889 | 1148.988 | 1019.724 | 44200.77 | 511.5543 | 7272.451 | 933.9104 | 2598.257 | 204.1335 | 319.8916 |
| 216.9624 | 1149.003 | 1019.307 | 44201.63 | 511.5593 | 7272.507 | 933.9192 | 2598.379 | 204.1262 | 319.8843 |
| 217.0293 | 1149.019 | 1018.861 | 44202.41 | 511.5641 | 7272.559 | 933.9277 | 2598.489 | 204.118  | 319.8762 |
| 217.0834 | 1149.013 | 1019.413 | 44203.04 | 511.5638 | 7272.578 | 933.9274 | 2598.579 | 204.1313 | 319.8893 |
| 217.1336 | 1149.011 | 1019.764 | 44203.62 | 511.5642 | 7272.6   | 933.9284 | 2598.662 | 204.1401 | 319.8981 |
| 217.1923 | 1149.015 | 1019.809 | 44204.29 | 511.5664 | 7272.634 | 933.9325 | 2598.758 | 204.1424 | 319.9004 |
| 217.2634 | 1149.026 | 1019.603 | 44205.12 | 511.5702 | 7272.683 | 933.9394 | 2598.875 | 204.1395 | 319.8976 |
| 217.3358 | 1149.046 | 1018.962 | 44205.96 | 511.5762 | 7272.743 | 933.9498 | 2598.995 | 204.1273 | 319.8854 |
| 217.3956 | 1149.049 | 1019.095 | 44206.65 | 511.578  | 7272.776 | 933.9532 | 2599.093 | 204.1315 | 319.8896 |
| 217.4458 | 1149.043 | 1019.676 | 44207.22 | 511.5774 | 7272.792 | 933.9524 | 2599.175 | 204.1453 | 319.9033 |
| 217.4988 | 1149.044 | 1019.843 | 44207.83 | 511.5787 | 7272.819 | 933.9551 | 2599.262 | 204.1502 | 319.9081 |
| 217.5643 | 1149.052 | 1019.783 | 44208.58 | 511.5817 | 7272.861 | 933.9604 | 2599.369 | 204.1504 | 319.9083 |
| 217.6388 | 1149.068 | 1019.32  | 44209.44 | 511.5868 | 7272.917 | 933.9695 | 2599.492 | 204.142  | 319.9    |
| 217.6922 | 1149.066 | 1019.685 | 44210.05 | 511.5873 | 7272.94  | 933.9707 | 2599.579 | 204.1512 | 319.9091 |
| 217.7455 | 1149.068 | 1019.853 | 44210.66 | 511.5887 | 7272.968 | 933.9733 | 2599.666 | 204.156  | 319.9139 |
| 217.8104 | 1149.075 | 1019.799 | 44211.4  | 511.5916 | 7273.009 | 933.9785 | 2599.772 | 204.1563 | 319.9142 |
| 217.884  | 1149.091 | 1019.382 | 44212.25 | 511.5965 | 7273.063 | 933.9872 | 2599.892 | 204.1489 | 319.9069 |
| 217.9508 | 1149.106 | 1018.935 | 44213.01 | 511.6012 | 7273.115 | 933.9956 | 2600.001 | 204.1407 | 319.8987 |
| 218.0049 | 1149.1   | 1019.487 | 44213.63 | 511.6009 | 7273.133 | 933.9953 | 2600.089 | 204.154  | 319.9119 |
| 218.0552 | 1149.098 | 1019.838 | 44214.19 | 511.6013 | 7273.154 | 933.9962 | 2600.17  | 204.1628 | 319.9206 |
| 218.1138 | 1149.102 | 1019.883 | 44214.86 | 511.6034 | 7273.188 | 934.0002 | 2600.266 | 204.1651 | 319.9229 |
| 218.185  | 1149.113 | 1019.677 | 44215.67 | 511.6072 | 7273.236 | 934.007  | 2600.381 | 204.1622 | 319.92   |
| 218.2573 | 1149.133 | 1019.036 | 44216.5  | 511.6131 | 7273.296 | 934.0173 | 2600.499 | 204.1499 | 319.9078 |
| 218.3172 | 1149.136 | 1019.169 | 44217.17 | 511.6149 | 7273.328 | 934.0207 | 2600.595 | 204.1541 | 319.912  |
| 218.3673 | 1149.129 | 1019.75  | 44217.73 | 511.6142 | 7273.343 | 934.0198 | 2600.676 | 204.1679 | 319.9257 |
| 218.4204 | 1149.131 | 1019.916 | 44218.33 | 511.6156 | 7273.37  | 934.0224 | 2600.762 | 204.1727 | 319.9304 |
| 218.4858 | 1149.138 | 1019.856 | 44219.07 | 511.6184 | 7273.411 | 934.0276 | 2600.868 | 204.1729 | 319.9306 |
| 218.5603 | 1149.155 | 1019.393 | 44219.91 | 511.6236 | 7273.467 | 934.0366 | 2600.988 | 204.1645 | 319.9223 |
| 218.6137 | 1149.152 | 1019.758 | 44220.51 | 511.624  | 7273.489 | 934.0377 | 2601.074 | 204.1736 | 319.9313 |
| 218.6671 | 1149.154 | 1019.926 | 44221.11 | 511.6253 | 7273.516 | 934.0402 | 2601.16  | 204.1785 | 319.9361 |

|          |          |          |          |          |          |          |          |          |          |
|----------|----------|----------|----------|----------|----------|----------|----------|----------|----------|
| 218.732  | 1149.161 | 1019.872 | 44221.84 | 511.6282 | 7273.556 | 934.0454 | 2601.264 | 204.1787 | 319.9364 |
| 218.8055 | 1149.176 | 1019.454 | 44222.67 | 511.633  | 7273.61  | 934.0539 | 2601.383 | 204.1713 | 319.929  |
| 218.8724 | 1149.192 | 1019.008 | 44223.42 | 511.6377 | 7273.661 | 934.0623 | 2601.49  | 204.1631 | 319.9209 |
| 218.9265 | 1149.186 | 1019.559 | 44224.02 | 511.6373 | 7273.678 | 934.0619 | 2601.577 | 204.1763 | 319.934  |
| 218.9767 | 1149.183 | 1019.911 | 44224.58 | 511.6377 | 7273.699 | 934.0628 | 2601.657 | 204.185  | 319.9427 |
| 219.0354 | 1149.188 | 1019.956 | 44225.23 | 511.6398 | 7273.732 | 934.0666 | 2601.751 | 204.1873 | 319.9449 |
| 219.1065 | 1149.199 | 1019.749 | 44226.03 | 511.6435 | 7273.779 | 934.0734 | 2601.865 | 204.1844 | 319.942  |
| 219.1789 | 1149.218 | 1019.108 | 44226.84 | 511.6493 | 7273.838 | 934.0836 | 2601.98  | 204.1721 | 319.9298 |
| 219.2387 | 1149.221 | 1019.241 | 44227.5  | 511.6511 | 7273.87  | 934.0868 | 2602.076 | 204.1763 | 319.934  |
| 219.2889 | 1149.214 | 1019.822 | 44228.05 | 511.6504 | 7273.884 | 934.0859 | 2602.155 | 204.19   | 319.9476 |
| 219.3419 | 1149.216 | 1019.988 | 44228.64 | 511.6517 | 7273.911 | 934.0884 | 2602.24  | 204.1948 | 319.9524 |
| 219.4074 | 1149.223 | 1019.928 | 44229.36 | 511.6545 | 7273.951 | 934.0936 | 2602.344 | 204.195  | 319.9525 |
| 219.4819 | 1149.239 | 1019.465 | 44230.19 | 511.6596 | 7274.006 | 934.1025 | 2602.463 | 204.1865 | 319.9441 |
| 219.5353 | 1149.237 | 1019.829 | 44230.78 | 511.66   | 7274.027 | 934.1035 | 2602.547 | 204.1956 | 319.9532 |
| 219.5887 | 1149.238 | 1019.998 | 44231.37 | 511.6613 | 7274.054 | 934.1059 | 2602.632 | 204.2005 | 319.9579 |
| 219.6536 | 1149.245 | 1019.943 | 44232.08 | 511.6641 | 7274.093 | 934.111  | 2602.735 | 204.2007 | 319.9582 |
| 219.7271 | 1149.261 | 1019.526 | 44232.89 | 511.6689 | 7274.146 | 934.1195 | 2602.851 | 204.1932 | 319.9508 |
| 219.794  | 1149.276 | 1019.079 | 44233.63 | 511.6735 | 7274.196 | 934.1277 | 2602.957 | 204.185  | 319.9426 |
| 219.8481 | 1149.27  | 1019.63  | 44234.22 | 511.6731 | 7274.214 | 934.1272 | 2603.042 | 204.1982 | 319.9557 |
| 219.8983 | 1149.267 | 1019.982 | 44234.77 | 511.6734 | 7274.234 | 934.1281 | 2603.121 | 204.2069 | 319.9643 |
| 219.957  | 1149.272 | 1020.027 | 44235.41 | 511.6755 | 7274.266 | 934.1319 | 2603.214 | 204.2092 | 319.9666 |
| 220.0281 | 1149.282 | 1019.82  | 44236.19 | 511.6792 | 7274.312 | 934.1385 | 2603.326 | 204.2062 | 319.9636 |
| 220.1005 | 1149.302 | 1019.179 | 44236.99 | 511.6849 | 7274.37  | 934.1486 | 2603.44  | 204.1938 | 319.9514 |
| 220.1603 | 1149.304 | 1019.312 | 44237.64 | 511.6866 | 7274.401 | 934.1518 | 2603.534 | 204.198  | 319.9555 |
| 220.2105 | 1149.297 | 1019.893 | 44238.18 | 511.6859 | 7274.415 | 934.1508 | 2603.613 | 204.2118 | 319.9691 |
| 220.2635 | 1149.299 | 1020.059 | 44238.75 | 511.6872 | 7274.441 | 934.1532 | 2603.696 | 204.2165 | 319.9739 |
| 220.329  | 1149.306 | 1019.998 | 44239.47 | 511.69   | 7274.48  | 934.1583 | 2603.798 | 204.2166 | 319.974  |
| 220.4035 | 1149.322 | 1019.535 | 44240.28 | 511.695  | 7274.535 | 934.1671 | 2603.915 | 204.2082 | 319.9656 |
| 220.4569 | 1149.32  | 1019.9   | 44240.85 | 511.6953 | 7274.556 | 934.168  | 2603.998 | 204.2173 | 319.9746 |
| 220.5102 | 1149.321 | 1020.068 | 44241.43 | 511.6966 | 7274.582 | 934.1704 | 2604.082 | 204.2221 | 319.9794 |
| 220.5751 | 1149.328 | 1020.013 | 44242.13 | 511.6993 | 7274.62  | 934.1754 | 2604.183 | 204.2223 | 319.9796 |
| 220.6487 | 1149.343 | 1019.596 | 44242.93 | 511.7041 | 7274.673 | 934.1838 | 2604.298 | 204.2148 | 319.9721 |
| 220.7155 | 1149.358 | 1019.149 | 44243.65 | 511.7087 | 7274.722 | 934.1919 | 2604.402 | 204.2065 | 319.9639 |
| 220.7696 | 1149.352 | 1019.7   | 44244.23 | 511.7082 | 7274.739 | 934.1914 | 2604.486 | 204.2196 | 319.977  |

|          |          |          |          |          |          |          |          |          |          |
|----------|----------|----------|----------|----------|----------|----------|----------|----------|----------|
| 220.8199 | 1149.349 | 1020.052 | 44244.77 | 511.7085 | 7274.758 | 934.1922 | 2604.564 | 204.2284 | 319.9856 |
| 220.8785 | 1149.354 | 1020.097 | 44245.4  | 511.7105 | 7274.79  | 934.1959 | 2604.655 | 204.2306 | 319.9878 |
| 220.9497 | 1149.364 | 1019.89  | 44246.17 | 511.7142 | 7274.836 | 934.2024 | 2604.766 | 204.2276 | 319.9849 |
| 221.022  | 1149.384 | 1019.248 | 44246.95 | 511.7199 | 7274.893 | 934.2124 | 2604.878 | 204.2152 | 319.9726 |
| 221.0819 | 1149.386 | 1019.381 | 44247.59 | 511.7215 | 7274.923 | 934.2155 | 2604.971 | 204.2194 | 319.9767 |
| 221.132  | 1149.379 | 1019.962 | 44248.12 | 511.7207 | 7274.937 | 934.2145 | 2605.048 | 204.2331 | 319.9903 |
| 221.1851 | 1149.381 | 1020.128 | 44248.68 | 511.722  | 7274.962 | 934.2168 | 2605.13  | 204.2378 | 319.995  |
| 221.2505 | 1149.388 | 1020.068 | 44249.38 | 511.7247 | 7275.001 | 934.2218 | 2605.231 | 204.2379 | 319.9951 |
| 221.325  | 1149.404 | 1019.605 | 44250.18 | 511.7297 | 7275.054 | 934.2306 | 2605.346 | 204.2294 | 319.9866 |
| 221.3784 | 1149.401 | 1019.969 | 44250.74 | 511.73   | 7275.075 | 934.2314 | 2605.428 | 204.2385 | 319.9956 |
| 221.4318 | 1149.402 | 1020.137 | 44251.31 | 511.7312 | 7275.1   | 934.2338 | 2605.51  | 204.2433 | 320.0004 |
| 221.4967 | 1149.409 | 1020.082 | 44252    | 511.7339 | 7275.138 | 934.2386 | 2605.61  | 204.2434 | 320.0005 |
| 221.5702 | 1149.424 | 1019.665 | 44252.78 | 511.7386 | 7275.19  | 934.2469 | 2605.723 | 204.2359 | 319.9931 |
| 221.6371 | 1149.439 | 1019.218 | 44253.49 | 511.7432 | 7275.238 | 934.255  | 2605.826 | 204.2276 | 319.9848 |
| 221.6912 | 1149.433 | 1019.769 | 44254.06 | 511.7426 | 7275.254 | 934.2544 | 2605.909 | 204.2407 | 319.9979 |
| 221.7415 | 1149.43  | 1020.121 | 44254.59 | 511.7429 | 7275.273 | 934.2551 | 2605.985 | 204.2494 | 320.0065 |
| 221.8001 | 1149.435 | 1020.165 | 44255.21 | 511.7449 | 7275.305 | 934.2587 | 2606.075 | 204.2516 | 320.0087 |
| 221.8712 | 1149.445 | 1019.958 | 44255.96 | 511.7485 | 7275.349 | 934.2652 | 2606.184 | 204.2486 | 320.0057 |
| 221.9436 | 1149.464 | 1019.317 | 44256.73 | 511.7541 | 7275.406 | 934.2751 | 2606.295 | 204.2362 | 319.9933 |
| 222.0034 | 1149.467 | 1019.449 | 44257.35 | 511.7558 | 7275.435 | 934.2781 | 2606.386 | 204.2403 | 319.9975 |
| 222.0536 | 1149.46  | 1020.03  | 44257.87 | 511.7549 | 7275.448 | 934.277  | 2606.462 | 204.254  | 320.011  |
| 222.1066 | 1149.461 | 1020.196 | 44258.43 | 511.7561 | 7275.473 | 934.2793 | 2606.543 | 204.2588 | 320.0157 |
| 222.1721 | 1149.468 | 1020.136 | 44259.12 | 511.7588 | 7275.511 | 934.2842 | 2606.642 | 204.2588 | 320.0158 |
| 222.2466 | 1149.484 | 1019.672 | 44259.9  | 511.7637 | 7275.564 | 934.2928 | 2606.756 | 204.2503 | 320.0073 |
| 222.3    | 1149.481 | 1020.037 | 44260.45 | 511.764  | 7275.584 | 934.2936 | 2606.836 | 204.2593 | 320.0163 |
| 222.3534 | 1149.482 | 1020.205 | 44261.01 | 511.7652 | 7275.609 | 934.2959 | 2606.917 | 204.2641 | 320.021  |
| 222.4183 | 1149.489 | 1020.15  | 44261.68 | 511.7679 | 7275.646 | 934.3007 | 2607.016 | 204.2642 | 320.0211 |
| 222.4918 | 1149.504 | 1019.732 | 44262.45 | 511.7725 | 7275.697 | 934.3089 | 2607.127 | 204.2567 | 320.0136 |
| 222.5587 | 1149.519 | 1019.285 | 44263.15 | 511.777  | 7275.745 | 934.3169 | 2607.228 | 204.2483 | 320.0054 |
| 222.6128 | 1149.512 | 1019.836 | 44263.71 | 511.7765 | 7275.76  | 934.3162 | 2607.31  | 204.2614 | 320.0184 |
| 222.663  | 1149.51  | 1020.188 | 44264.23 | 511.7767 | 7275.779 | 934.3168 | 2607.385 | 204.2701 | 320.027  |
| 222.7217 | 1149.514 | 1020.232 | 44264.83 | 511.7786 | 7275.81  | 934.3204 | 2607.474 | 204.2723 | 320.0291 |
| 222.7928 | 1149.524 | 1020.025 | 44265.57 | 511.7822 | 7275.854 | 934.3268 | 2607.581 | 204.2693 | 320.0261 |
| 222.8652 | 1149.543 | 1019.384 | 44266.32 | 511.7878 | 7275.909 | 934.3366 | 2607.69  | 204.2568 | 320.0138 |

|          |          |          |          |          |          |          |          |          |          |
|----------|----------|----------|----------|----------|----------|----------|----------|----------|----------|
| 222.925  | 1149.546 | 1019.516 | 44266.94 | 511.7894 | 7275.938 | 934.3396 | 2607.78  | 204.2609 | 320.0178 |
| 222.9752 | 1149.538 | 1020.097 | 44267.45 | 511.7885 | 7275.951 | 934.3384 | 2607.855 | 204.2746 | 320.0314 |
| 223.0282 | 1149.54  | 1020.263 | 44268    | 511.7897 | 7275.975 | 934.3406 | 2607.935 | 204.2793 | 320.0361 |
| 223.0937 | 1149.546 | 1020.202 | 44268.67 | 511.7923 | 7276.012 | 934.3454 | 2608.033 | 204.2793 | 320.0361 |
| 223.1682 | 1149.562 | 1019.739 | 44269.44 | 511.7972 | 7276.064 | 934.354  | 2608.144 | 204.2707 | 320.0276 |
| 223.2216 | 1149.559 | 1020.103 | 44269.98 | 511.7974 | 7276.084 | 934.3547 | 2608.224 | 204.2797 | 320.0365 |
| 223.275  | 1149.561 | 1020.271 | 44270.53 | 511.7986 | 7276.108 | 934.3569 | 2608.304 | 204.2845 | 320.0412 |
| 223.3398 | 1149.567 | 1020.216 | 44271.19 | 511.8012 | 7276.145 | 934.3616 | 2608.4   | 204.2846 | 320.0414 |
| 223.4134 | 1149.582 | 1019.798 | 44271.94 | 511.8058 | 7276.195 | 934.3697 | 2608.51  | 204.277  | 320.0338 |
| 223.4802 | 1149.597 | 1019.351 | 44272.63 | 511.8103 | 7276.242 | 934.3776 | 2608.61  | 204.2686 | 320.0255 |
| 223.5343 | 1149.59  | 1019.903 | 44273.18 | 511.8097 | 7276.257 | 934.3769 | 2608.69  | 204.2817 | 320.0385 |
| 223.5846 | 1149.587 | 1020.254 | 44273.69 | 511.8099 | 7276.275 | 934.3774 | 2608.765 | 204.2904 | 320.0471 |
| 223.6432 | 1149.592 | 1020.298 | 44274.28 | 511.8118 | 7276.305 | 934.3809 | 2608.852 | 204.2926 | 320.0492 |
| 223.7144 | 1149.602 | 1020.091 | 44275    | 511.8153 | 7276.348 | 934.3872 | 2608.957 | 204.2895 | 320.0462 |
| 223.7867 | 1149.621 | 1019.449 | 44275.74 | 511.8208 | 7276.403 | 934.397  | 2609.065 | 204.277  | 320.0338 |
| 223.8466 | 1149.623 | 1019.582 | 44276.35 | 511.8224 | 7276.432 | 934.3998 | 2609.153 | 204.2811 | 320.0379 |
| 223.8967 | 1149.616 | 1020.163 | 44276.85 | 511.8215 | 7276.444 | 934.3986 | 2609.227 | 204.2947 | 320.0514 |
| 223.9498 | 1149.617 | 1020.329 | 44277.38 | 511.8226 | 7276.468 | 934.4008 | 2609.306 | 204.2994 | 320.056  |
| 224.0153 | 1149.624 | 1020.268 | 44278.05 | 511.8252 | 7276.504 | 934.4055 | 2609.402 | 204.2994 | 320.056  |
| 224.0897 | 1149.639 | 1019.804 | 44278.8  | 511.83   | 7276.555 | 934.414  | 2609.512 | 204.2908 | 320.0475 |
| 224.1431 | 1149.636 | 1020.169 | 44279.33 | 511.8302 | 7276.574 | 934.4146 | 2609.591 | 204.2998 | 320.0564 |
| 224.1965 | 1149.638 | 1020.337 | 44279.87 | 511.8314 | 7276.598 | 934.4168 | 2609.669 | 204.3045 | 320.0611 |
| 224.2614 | 1149.644 | 1020.281 | 44280.52 | 511.8339 | 7276.634 | 934.4214 | 2609.765 | 204.3046 | 320.0612 |
| 224.3349 | 1149.659 | 1019.863 | 44281.26 | 511.8385 | 7276.683 | 934.4294 | 2609.873 | 204.297  | 320.0536 |
| 224.4018 | 1149.673 | 1019.416 | 44281.93 | 511.8429 | 7276.73  | 934.4372 | 2609.971 | 204.2886 | 320.0453 |
| 224.4559 | 1149.667 | 1019.967 | 44282.47 | 511.8423 | 7276.744 | 934.4364 | 2610.05  | 204.3017 | 320.0583 |
| 224.5062 | 1149.664 | 1020.319 | 44282.97 | 511.8424 | 7276.762 | 934.4369 | 2610.124 | 204.3103 | 320.0668 |
| 224.5648 | 1149.668 | 1020.363 | 44283.55 | 511.8443 | 7276.792 | 934.4404 | 2610.209 | 204.3125 | 320.069  |
| 224.6359 | 1149.678 | 1020.156 | 44284.26 | 511.8477 | 7276.834 | 934.4466 | 2610.313 | 204.3094 | 320.0659 |
| 224.7083 | 1149.697 | 1019.514 | 44284.99 | 511.8532 | 7276.888 | 934.4562 | 2610.419 | 204.2968 | 320.0535 |
| 224.7681 | 1149.699 | 1019.646 | 44285.58 | 511.8547 | 7276.916 | 934.459  | 2610.506 | 204.3009 | 320.0575 |
| 224.8183 | 1149.692 | 1020.227 | 44286.08 | 511.8538 | 7276.928 | 934.4577 | 2610.579 | 204.3145 | 320.071  |
| 224.8714 | 1149.693 | 1020.393 | 44286.6  | 511.8549 | 7276.951 | 934.4598 | 2610.656 | 204.3192 | 320.0756 |
| 224.9368 | 1149.699 | 1020.332 | 44287.25 | 511.8575 | 7276.987 | 934.4645 | 2610.752 | 204.3192 | 320.0756 |

|          |          |          |          |          |          |          |          |          |          |
|----------|----------|----------|----------|----------|----------|----------|----------|----------|----------|
| 225.0113 | 1149.715 | 1019.869 | 44287.99 | 511.8622 | 7277.037 | 934.4729 | 2610.86  | 204.3105 | 320.067  |
| 225.0647 | 1149.712 | 1020.233 | 44288.51 | 511.8624 | 7277.056 | 934.4734 | 2610.937 | 204.3195 | 320.0759 |
| 225.1181 | 1149.713 | 1020.401 | 44289.04 | 511.8635 | 7277.079 | 934.4755 | 2611.015 | 204.3242 | 320.0806 |
| 225.183  | 1149.719 | 1020.345 | 44289.68 | 511.866  | 7277.114 | 934.4801 | 2611.109 | 204.3243 | 320.0807 |
| 225.2565 | 1149.734 | 1019.927 | 44290.41 | 511.8705 | 7277.163 | 934.488  | 2611.215 | 204.3166 | 320.0731 |
| 225.3234 | 1149.748 | 1019.48  | 44291.07 | 511.8749 | 7277.209 | 934.4958 | 2611.312 | 204.3082 | 320.0647 |
| 225.3775 | 1149.742 | 1020.031 | 44291.59 | 511.8742 | 7277.223 | 934.4949 | 2611.39  | 204.3213 | 320.0777 |
| 225.4277 | 1149.739 | 1020.383 | 44292.08 | 511.8744 | 7277.24  | 934.4953 | 2611.462 | 204.3299 | 320.0862 |
| 225.4864 | 1149.743 | 1020.427 | 44292.66 | 511.8762 | 7277.269 | 934.4987 | 2611.547 | 204.332  | 320.0883 |
| 225.5575 | 1149.753 | 1020.219 | 44293.35 | 511.8796 | 7277.311 | 934.5048 | 2611.649 | 204.3289 | 320.0852 |
| 225.6299 | 1149.772 | 1019.577 | 44294.07 | 511.8851 | 7277.364 | 934.5144 | 2611.753 | 204.3163 | 320.0728 |
| 225.6897 | 1149.774 | 1019.71  | 44294.65 | 511.8865 | 7277.392 | 934.5171 | 2611.839 | 204.3204 | 320.0768 |
| 225.7399 | 1149.766 | 1020.29  | 44295.13 | 511.8856 | 7277.403 | 934.5157 | 2611.911 | 204.334  | 320.0903 |
| 225.7929 | 1149.767 | 1020.457 | 44295.65 | 511.8866 | 7277.426 | 934.5178 | 2611.987 | 204.3386 | 320.0949 |
| 225.8584 | 1149.774 | 1020.395 | 44296.28 | 511.8892 | 7277.461 | 934.5224 | 2612.081 | 204.3385 | 320.0948 |
| 225.9329 | 1149.789 | 1019.932 | 44297.01 | 511.8939 | 7277.511 | 934.5307 | 2612.187 | 204.3299 | 320.0862 |
| 225.9863 | 1149.786 | 1020.296 | 44297.52 | 511.894  | 7277.529 | 934.5312 | 2612.264 | 204.3388 | 320.0951 |
| 226.0397 | 1149.787 | 1020.463 | 44298.04 | 511.8951 | 7277.552 | 934.5332 | 2612.34  | 204.3435 | 320.0997 |
| 226.1045 | 1149.793 | 1020.408 | 44298.67 | 511.8975 | 7277.586 | 934.5377 | 2612.432 | 204.3436 | 320.0998 |
| 226.1781 | 1149.808 | 1019.99  | 44299.38 | 511.902  | 7277.634 | 934.5455 | 2612.537 | 204.3359 | 320.0922 |
| 226.2449 | 1149.822 | 1019.542 | 44300.03 | 511.9063 | 7277.679 | 934.5532 | 2612.633 | 204.3274 | 320.0838 |
| 226.299  | 1149.815 | 1020.094 | 44300.55 | 511.9056 | 7277.693 | 934.5523 | 2612.709 | 204.3405 | 320.0967 |
| 226.3493 | 1149.812 | 1020.445 | 44301.03 | 511.9057 | 7277.709 | 934.5526 | 2612.781 | 204.3491 | 320.1053 |
| 226.4079 | 1149.816 | 1020.489 | 44301.59 | 511.9075 | 7277.738 | 934.5559 | 2612.864 | 204.3512 | 320.1073 |
| 226.4791 | 1149.826 | 1020.282 | 44302.27 | 511.9109 | 7277.779 | 934.562  | 2612.965 | 204.348  | 320.1042 |
| 226.5515 | 1149.845 | 1019.639 | 44302.97 | 511.9163 | 7277.832 | 934.5715 | 2613.067 | 204.3354 | 320.0917 |
| 226.6113 | 1149.847 | 1019.772 | 44303.54 | 511.9177 | 7277.859 | 934.5741 | 2613.152 | 204.3394 | 320.0957 |
| 226.6614 | 1149.839 | 1020.353 | 44304.02 | 511.9167 | 7277.869 | 934.5727 | 2613.223 | 204.353  | 320.1092 |
| 226.7145 | 1149.84  | 1020.519 | 44304.53 | 511.9178 | 7277.892 | 934.5747 | 2613.298 | 204.3577 | 320.1138 |
| 226.78   | 1149.847 | 1020.457 | 44305.15 | 511.9203 | 7277.926 | 934.5792 | 2613.39  | 204.3576 | 320.1137 |
| 226.8544 | 1149.862 | 1019.993 | 44305.86 | 511.9249 | 7277.975 | 934.5874 | 2613.495 | 204.3489 | 320.1051 |
| 226.9078 | 1149.859 | 1020.357 | 44306.37 | 511.925  | 7277.993 | 934.5878 | 2613.57  | 204.3578 | 320.1139 |
| 226.9612 | 1149.86  | 1020.525 | 44306.87 | 511.926  | 7278.015 | 934.5898 | 2613.645 | 204.3625 | 320.1185 |
| 227.0261 | 1149.866 | 1020.47  | 44307.49 | 511.9285 | 7278.049 | 934.5942 | 2613.737 | 204.3625 | 320.1186 |

|          |          |          |          |          |          |          |          |          |          |
|----------|----------|----------|----------|----------|----------|----------|----------|----------|----------|
| 227.0996 | 1149.88  | 1020.052 | 44308.19 | 511.9329 | 7278.096 | 934.602  | 2613.84  | 204.3548 | 320.1109 |
| 227.1665 | 1149.895 | 1019.604 | 44308.83 | 511.9372 | 7278.141 | 934.6096 | 2613.934 | 204.3463 | 320.1025 |
| 227.2206 | 1149.888 | 1020.155 | 44309.33 | 511.9364 | 7278.154 | 934.6086 | 2614.009 | 204.3593 | 320.1154 |
| 227.2709 | 1149.885 | 1020.506 | 44309.81 | 511.9365 | 7278.17  | 934.6089 | 2614.08  | 204.3679 | 320.1239 |
| 227.3295 | 1149.888 | 1020.55  | 44310.36 | 511.9383 | 7278.198 | 934.6121 | 2614.162 | 204.37   | 320.126  |
| 227.4006 | 1149.898 | 1020.343 | 44311.03 | 511.9416 | 7278.238 | 934.6181 | 2614.261 | 204.3668 | 320.1228 |
| 227.473  | 1149.917 | 1019.7   | 44311.72 | 511.947  | 7278.29  | 934.6275 | 2614.362 | 204.3542 | 320.1103 |
| 227.5328 | 1149.919 | 1019.833 | 44312.28 | 511.9483 | 7278.317 | 934.6301 | 2614.445 | 204.3582 | 320.1143 |
| 227.583  | 1149.911 | 1020.413 | 44312.74 | 511.9473 | 7278.327 | 934.6286 | 2614.515 | 204.3718 | 320.1277 |
| 227.6361 | 1149.912 | 1020.579 | 44313.24 | 511.9483 | 7278.349 | 934.6305 | 2614.589 | 204.3764 | 320.1323 |
| 227.7015 | 1149.918 | 1020.518 | 44313.85 | 511.9508 | 7278.383 | 934.635  | 2614.68  | 204.3762 | 320.1322 |
| 227.776  | 1149.934 | 1020.054 | 44314.55 | 511.9554 | 7278.431 | 934.6431 | 2614.783 | 204.3675 | 320.1235 |
| 227.8294 | 1149.93  | 1020.418 | 44315.05 | 511.9555 | 7278.448 | 934.6435 | 2614.857 | 204.3765 | 320.1324 |
| 227.8828 | 1149.931 | 1020.586 | 44315.55 | 511.9565 | 7278.47  | 934.6454 | 2614.931 | 204.3811 | 320.137  |
| 227.9477 | 1149.937 | 1020.53  | 44316.15 | 511.9588 | 7278.503 | 934.6497 | 2615.021 | 204.3811 | 320.137  |
| 228.0212 | 1149.951 | 1020.112 | 44316.84 | 511.9632 | 7278.55  | 934.6574 | 2615.123 | 204.3734 | 320.1293 |
| 228.0881 | 1149.966 | 1019.664 | 44317.46 | 511.9675 | 7278.594 | 934.6649 | 2615.215 | 204.3648 | 320.1209 |
| 228.1422 | 1149.959 | 1020.215 | 44317.96 | 511.9667 | 7278.606 | 934.6639 | 2615.29  | 204.3778 | 320.1338 |
| 228.1924 | 1149.956 | 1020.567 | 44318.42 | 511.9667 | 7278.622 | 934.6641 | 2615.359 | 204.3864 | 320.1423 |
| 228.2511 | 1149.959 | 1020.611 | 44318.97 | 511.9684 | 7278.649 | 934.6673 | 2615.44  | 204.3885 | 320.1443 |
| 228.3222 | 1149.969 | 1020.403 | 44319.63 | 511.9717 | 7278.689 | 934.6732 | 2615.538 | 204.3852 | 320.1411 |
| 228.3946 | 1149.987 | 1019.76  | 44320.3  | 511.9771 | 7278.741 | 934.6825 | 2615.637 | 204.3726 | 320.1285 |
| 228.4544 | 1149.989 | 1019.893 | 44320.85 | 511.9784 | 7278.766 | 934.685  | 2615.72  | 204.3766 | 320.1325 |
| 228.5046 | 1149.982 | 1020.473 | 44321.31 | 511.9774 | 7278.776 | 934.6835 | 2615.788 | 204.3901 | 320.1459 |
| 228.5576 | 1149.982 | 1020.639 | 44321.79 | 511.9783 | 7278.797 | 934.6853 | 2615.861 | 204.3947 | 320.1505 |
| 228.6231 | 1149.989 | 1020.578 | 44322.4  | 511.9807 | 7278.831 | 934.6897 | 2615.95  | 204.3946 | 320.1503 |
| 228.6976 | 1150.004 | 1020.114 | 44323.08 | 511.9853 | 7278.878 | 934.6977 | 2616.053 | 204.3858 | 320.1417 |
| 228.751  | 1150.001 | 1020.478 | 44323.57 | 511.9853 | 7278.895 | 934.6981 | 2616.125 | 204.3947 | 320.1505 |
| 228.8044 | 1150.001 | 1020.645 | 44324.06 | 511.9863 | 7278.916 | 934.6999 | 2616.198 | 204.3994 | 320.1551 |
| 228.8693 | 1150.007 | 1020.59  | 44324.65 | 511.9886 | 7278.949 | 934.7042 | 2616.287 | 204.3993 | 320.1551 |
| 228.9428 | 1150.021 | 1020.171 | 44325.33 | 511.993  | 7278.995 | 934.7118 | 2616.387 | 204.3916 | 320.1474 |
| 229.0096 | 1150.035 | 1019.723 | 44325.94 | 511.9972 | 7279.038 | 934.7192 | 2616.478 | 204.383  | 320.1389 |
| 229.0637 | 1150.028 | 1020.275 | 44326.43 | 511.9964 | 7279.05  | 934.7181 | 2616.551 | 204.396  | 320.1518 |
| 229.114  | 1150.025 | 1020.626 | 44326.88 | 511.9964 | 7279.066 | 934.7183 | 2616.62  | 204.4046 | 320.1602 |

|          |          |          |          |          |          |          |          |          |          |
|----------|----------|----------|----------|----------|----------|----------|----------|----------|----------|
| 229.1726 | 1150.029 | 1020.67  | 44327.41 | 511.9981 | 7279.092 | 934.7214 | 2616.699 | 204.4066 | 320.1622 |
| 229.2438 | 1150.038 | 1020.462 | 44328.06 | 512.0013 | 7279.132 | 934.7272 | 2616.796 | 204.4033 | 320.159  |
| 229.3162 | 1150.057 | 1019.819 | 44328.72 | 512.0066 | 7279.183 | 934.7365 | 2616.894 | 204.3907 | 320.1465 |
| 229.376  | 1150.059 | 1019.951 | 44329.26 | 512.0079 | 7279.208 | 934.7389 | 2616.975 | 204.3946 | 320.1504 |
| 229.4262 | 1150.051 | 1020.532 | 44329.71 | 512.0068 | 7279.217 | 934.7373 | 2617.042 | 204.4082 | 320.1638 |
| 229.4792 | 1150.052 | 1020.698 | 44330.19 | 512.0078 | 7279.238 | 934.7392 | 2617.114 | 204.4127 | 320.1683 |
| 229.5447 | 1150.058 | 1020.636 | 44330.78 | 512.0101 | 7279.271 | 934.7434 | 2617.202 | 204.4126 | 320.1682 |
| 229.6191 | 1150.073 | 1020.172 | 44331.46 | 512.0146 | 7279.318 | 934.7514 | 2617.303 | 204.4038 | 320.1595 |
| 229.6725 | 1150.069 | 1020.536 | 44331.93 | 512.0147 | 7279.334 | 934.7517 | 2617.374 | 204.4127 | 320.1683 |
| 229.7259 | 1150.07  | 1020.704 | 44332.41 | 512.0156 | 7279.355 | 934.7535 | 2617.446 | 204.4173 | 320.1729 |
| 229.7908 | 1150.076 | 1020.648 | 44332.99 | 512.0179 | 7279.387 | 934.7577 | 2617.533 | 204.4172 | 320.1728 |
| 229.8643 | 1150.09  | 1020.229 | 44333.66 | 512.0222 | 7279.432 | 934.7652 | 2617.632 | 204.4094 | 320.1651 |
| 229.9312 | 1150.104 | 1019.781 | 44334.26 | 512.0264 | 7279.475 | 934.7725 | 2617.722 | 204.4009 | 320.1566 |
| 229.9853 | 1150.097 | 1020.333 | 44334.74 | 512.0255 | 7279.486 | 934.7714 | 2617.794 | 204.4138 | 320.1694 |
| 230.0356 | 1150.094 | 1020.684 | 44335.18 | 512.0255 | 7279.501 | 934.7715 | 2617.861 | 204.4224 | 320.1779 |
| 230.0942 | 1150.097 | 1020.727 | 44335.71 | 512.0271 | 7279.527 | 934.7746 | 2617.94  | 204.4244 | 320.1799 |
| 230.1653 | 1150.107 | 1020.52  | 44336.34 | 512.0303 | 7279.566 | 934.7803 | 2618.035 | 204.4211 | 320.1766 |
| 230.2377 | 1150.125 | 1019.877 | 44336.99 | 512.0356 | 7279.616 | 934.7895 | 2618.131 | 204.4084 | 320.164  |
| 230.2975 | 1150.127 | 1020.009 | 44337.52 | 512.0369 | 7279.641 | 934.7919 | 2618.211 | 204.4123 | 320.168  |
| 230.3477 | 1150.119 | 1020.59  | 44337.96 | 512.0357 | 7279.65  | 934.7902 | 2618.278 | 204.4259 | 320.1814 |
| 230.4008 | 1150.119 | 1020.755 | 44338.43 | 512.0366 | 7279.67  | 934.792  | 2618.348 | 204.4304 | 320.1859 |
| 230.4662 | 1150.125 | 1020.694 | 44339.01 | 512.039  | 7279.702 | 934.7962 | 2618.435 | 204.4302 | 320.1857 |
| 230.5407 | 1150.14  | 1020.23  | 44339.67 | 512.0435 | 7279.749 | 934.8041 | 2618.534 | 204.4214 | 320.177  |
| 230.5941 | 1150.137 | 1020.593 | 44340.14 | 512.0434 | 7279.764 | 934.8043 | 2618.605 | 204.4303 | 320.1857 |
| 230.6475 | 1150.138 | 1020.761 | 44340.61 | 512.0443 | 7279.785 | 934.806  | 2618.675 | 204.4349 | 320.1903 |
| 230.7124 | 1150.143 | 1020.705 | 44341.18 | 512.0466 | 7279.816 | 934.8101 | 2618.761 | 204.4348 | 320.1902 |
| 230.7859 | 1150.157 | 1020.286 | 44341.83 | 512.0508 | 7279.861 | 934.8176 | 2618.859 | 204.427  | 320.1825 |
| 230.8528 | 1150.171 | 1019.838 | 44342.42 | 512.055  | 7279.903 | 934.8249 | 2618.947 | 204.4184 | 320.174  |
| 230.9069 | 1150.164 | 1020.39  | 44342.89 | 512.0541 | 7279.914 | 934.8236 | 2619.018 | 204.4313 | 320.1868 |
| 230.9571 | 1150.161 | 1020.741 | 44343.33 | 512.0541 | 7279.929 | 934.8238 | 2619.084 | 204.4399 | 320.1952 |
| 231.0158 | 1150.164 | 1020.784 | 44343.85 | 512.0557 | 7279.954 | 934.8267 | 2619.161 | 204.4418 | 320.1972 |
| 231.0869 | 1150.174 | 1020.576 | 44344.47 | 512.0588 | 7279.992 | 934.8324 | 2619.255 | 204.4386 | 320.1939 |
| 231.1593 | 1150.192 | 1019.934 | 44345.11 | 512.064  | 7280.042 | 934.8415 | 2619.35  | 204.4258 | 320.1813 |
| 231.2191 | 1150.193 | 1020.066 | 44345.63 | 512.0653 | 7280.066 | 934.8438 | 2619.429 | 204.4297 | 320.1852 |

|          |          |          |          |          |          |          |          |          |          |
|----------|----------|----------|----------|----------|----------|----------|----------|----------|----------|
| 231.2693 | 1150.185 | 1020.646 | 44346.06 | 512.0641 | 7280.074 | 934.8421 | 2619.494 | 204.4432 | 320.1986 |
| 231.3223 | 1150.186 | 1020.812 | 44346.52 | 512.065  | 7280.095 | 934.8438 | 2619.564 | 204.4478 | 320.2031 |
| 231.3878 | 1150.192 | 1020.75  | 44347.09 | 512.0673 | 7280.126 | 934.848  | 2619.65  | 204.4476 | 320.2029 |
| 231.4623 | 1150.207 | 1020.286 | 44347.74 | 512.0717 | 7280.172 | 934.8558 | 2619.747 | 204.4387 | 320.1941 |
| 231.5157 | 1150.203 | 1020.65  | 44348.2  | 512.0717 | 7280.187 | 934.8559 | 2619.817 | 204.4476 | 320.2029 |
| 231.5691 | 1150.204 | 1020.817 | 44348.66 | 512.0726 | 7280.207 | 934.8576 | 2619.886 | 204.4522 | 320.2074 |
| 231.634  | 1150.21  | 1020.762 | 44349.22 | 512.0748 | 7280.238 | 934.8617 | 2619.971 | 204.4521 | 320.2073 |
| 231.7075 | 1150.223 | 1020.343 | 44349.86 | 512.079  | 7280.282 | 934.869  | 2620.067 | 204.4442 | 320.1995 |
| 231.7743 | 1150.237 | 1019.894 | 44350.44 | 512.0831 | 7280.324 | 934.8762 | 2620.154 | 204.4356 | 320.191  |
| 231.8284 | 1150.23  | 1020.445 | 44350.9  | 512.0822 | 7280.334 | 934.875  | 2620.224 | 204.4485 | 320.2038 |
| 231.8787 | 1150.227 | 1020.797 | 44351.33 | 512.0821 | 7280.348 | 934.875  | 2620.289 | 204.457  | 320.2122 |
| 231.9373 | 1150.23  | 1020.84  | 44351.83 | 512.0837 | 7280.374 | 934.8779 | 2620.365 | 204.459  | 320.2142 |
| 232.0085 | 1150.239 | 1020.632 | 44352.45 | 512.0868 | 7280.411 | 934.8835 | 2620.457 | 204.4557 | 320.2109 |
| 232.0809 | 1150.257 | 1019.989 | 44353.07 | 512.092  | 7280.46  | 934.8925 | 2620.551 | 204.4429 | 320.1983 |
| 232.1407 | 1150.259 | 1020.121 | 44353.58 | 512.0932 | 7280.484 | 934.8948 | 2620.628 | 204.4468 | 320.2021 |
| 232.1909 | 1150.251 | 1020.702 | 44354.01 | 512.092  | 7280.491 | 934.893  | 2620.693 | 204.4603 | 320.2155 |
| 232.2439 | 1150.251 | 1020.867 | 44354.46 | 512.0929 | 7280.511 | 934.8947 | 2620.761 | 204.4648 | 320.22   |
| 232.3094 | 1150.257 | 1020.806 | 44355.02 | 512.0951 | 7280.542 | 934.8988 | 2620.846 | 204.4646 | 320.2197 |
| 232.3839 | 1150.272 | 1020.341 | 44355.66 | 512.0995 | 7280.587 | 934.9065 | 2620.942 | 204.4557 | 320.211  |
| 232.4372 | 1150.268 | 1020.705 | 44356.11 | 512.0994 | 7280.602 | 934.9066 | 2621.011 | 204.4646 | 320.2197 |
| 232.4906 | 1150.269 | 1020.872 | 44356.56 | 512.1003 | 7280.622 | 934.9082 | 2621.079 | 204.4691 | 320.2242 |
| 232.5555 | 1150.275 | 1020.817 | 44357.11 | 512.1025 | 7280.652 | 934.9122 | 2621.162 | 204.469  | 320.2241 |
| 232.629  | 1150.288 | 1020.398 | 44357.74 | 512.1066 | 7280.695 | 934.9195 | 2621.257 | 204.4611 | 320.2163 |
| 232.6959 | 1150.302 | 1019.949 | 44358.31 | 512.1107 | 7280.737 | 934.9267 | 2621.343 | 204.4525 | 320.2077 |
| 232.75   | 1150.295 | 1020.5   | 44358.76 | 512.1098 | 7280.747 | 934.9253 | 2621.412 | 204.4654 | 320.2205 |
| 232.8003 | 1150.291 | 1020.851 | 44359.18 | 512.1096 | 7280.76  | 934.9253 | 2621.476 | 204.4739 | 320.2289 |
| 232.8589 | 1150.294 | 1020.895 | 44359.68 | 512.1112 | 7280.785 | 934.9282 | 2621.551 | 204.4758 | 320.2309 |
| 232.93   | 1150.304 | 1020.687 | 44360.28 | 512.1143 | 7280.822 | 934.9337 | 2621.642 | 204.4725 | 320.2276 |
| 233.0024 | 1150.322 | 1020.044 | 44360.89 | 512.1194 | 7280.87  | 934.9426 | 2621.734 | 204.4597 | 320.2149 |
| 233.0623 | 1150.323 | 1020.176 | 44361.39 | 512.1206 | 7280.893 | 934.9448 | 2621.81  | 204.4636 | 320.2187 |
| 233.1124 | 1150.315 | 1020.756 | 44361.81 | 512.1194 | 7280.901 | 934.943  | 2621.874 | 204.477  | 320.2321 |
| 233.1655 | 1150.315 | 1020.922 | 44362.25 | 512.1202 | 7280.92  | 934.9446 | 2621.941 | 204.4815 | 320.2365 |
| 233.2309 | 1150.321 | 1020.86  | 44362.8  | 512.1224 | 7280.95  | 934.9486 | 2622.024 | 204.4813 | 320.2363 |
| 233.3054 | 1150.336 | 1020.396 | 44363.43 | 512.1267 | 7280.995 | 934.9563 | 2622.119 | 204.4724 | 320.2275 |



|          |          |          |          |          |          |          |          |          |          |
|----------|----------|----------|----------|----------|----------|----------|----------|----------|----------|
| 233.3588 | 1150.332 | 1020.759 | 44363.87 | 512.1266 | 7281.009 | 934.9563 | 2622.187 | 204.4812 | 320.2362 |
| 233.4122 | 1150.333 | 1020.927 | 44364.31 | 512.1275 | 7281.028 | 934.9579 | 2622.254 | 204.4857 | 320.2407 |
| 233.4771 | 1150.338 | 1020.871 | 44364.85 | 512.1296 | 7281.058 | 934.9618 | 2622.336 | 204.4856 | 320.2406 |
| 233.5506 | 1150.352 | 1020.452 | 44365.47 | 512.1337 | 7281.101 | 934.9691 | 2622.429 | 204.4777 | 320.2327 |
| 233.6175 | 1150.365 | 1020.003 | 44366.03 | 512.1378 | 7281.142 | 934.9761 | 2622.514 | 204.4691 | 320.2242 |
| 233.6716 | 1150.358 | 1020.554 | 44366.47 | 512.1368 | 7281.151 | 934.9748 | 2622.582 | 204.4819 | 320.2369 |
| 233.7218 | 1150.355 | 1020.905 | 44366.89 | 512.1367 | 7281.164 | 934.9747 | 2622.645 | 204.4904 | 320.2453 |
| 233.7805 | 1150.358 | 1020.949 | 44367.37 | 512.1382 | 7281.189 | 934.9775 | 2622.719 | 204.4923 | 320.2472 |
| 233.8516 | 1150.367 | 1020.74  | 44367.96 | 512.1412 | 7281.225 | 934.9829 | 2622.808 | 204.489  | 320.2439 |
| 233.924  | 1150.385 | 1020.097 | 44368.56 | 512.1463 | 7281.273 | 934.9918 | 2622.899 | 204.4762 | 320.2312 |
| 233.9838 | 1150.386 | 1020.229 | 44369.06 | 512.1474 | 7281.295 | 934.994  | 2622.974 | 204.48   | 320.235  |
| 234.034  | 1150.378 | 1020.81  | 44369.46 | 512.1462 | 7281.302 | 934.9921 | 2623.037 | 204.4935 | 320.2484 |
| 234.087  | 1150.378 | 1020.975 | 44369.9  | 512.147  | 7281.321 | 934.9936 | 2623.103 | 204.498  | 320.2528 |
| 234.1525 | 1150.384 | 1020.913 | 44370.44 | 512.1492 | 7281.351 | 934.9976 | 2623.185 | 204.4977 | 320.2525 |
| 234.227  | 1150.399 | 1020.449 | 44371.05 | 512.1535 | 7281.395 | 935.0052 | 2623.278 | 204.4888 | 320.2437 |
| 234.2804 | 1150.395 | 1020.812 | 44371.49 | 512.1534 | 7281.409 | 935.0052 | 2623.345 | 204.4976 | 320.2524 |
| 234.3338 | 1150.395 | 1020.98  | 44371.92 | 512.1541 | 7281.428 | 935.0067 | 2623.411 | 204.5021 | 320.2569 |
| 234.3987 | 1150.401 | 1020.924 | 44372.45 | 512.1563 | 7281.457 | 935.0106 | 2623.492 | 204.5019 | 320.2567 |
| 234.4722 | 1150.414 | 1020.505 | 44373.06 | 512.1603 | 7281.499 | 935.0177 | 2623.584 | 204.494  | 320.2489 |
| 234.5391 | 1150.428 | 1020.056 | 44373.61 | 512.1643 | 7281.539 | 935.0247 | 2623.667 | 204.4853 | 320.2403 |
| 234.5932 | 1150.42  | 1020.607 | 44374.04 | 512.1633 | 7281.548 | 935.0233 | 2623.734 | 204.4982 | 320.253  |
| 234.6434 | 1150.417 | 1020.958 | 44374.45 | 512.1632 | 7281.561 | 935.0232 | 2623.796 | 204.5066 | 320.2614 |
| 234.702  | 1150.42  | 1021.002 | 44374.93 | 512.1647 | 7281.585 | 935.0259 | 2623.869 | 204.5085 | 320.2633 |
| 234.7732 | 1150.429 | 1020.793 | 44375.5  | 512.1677 | 7281.621 | 935.0313 | 2623.957 | 204.5052 | 320.2599 |
| 234.8456 | 1150.447 | 1020.15  | 44376.1  | 512.1727 | 7281.668 | 935.0401 | 2624.047 | 204.4923 | 320.2472 |
| 234.9054 | 1150.448 | 1020.282 | 44376.58 | 512.1738 | 7281.69  | 935.0422 | 2624.121 | 204.4962 | 320.251  |
| 234.9556 | 1150.44  | 1020.862 | 44376.98 | 512.1726 | 7281.697 | 935.0403 | 2624.183 | 204.5096 | 320.2644 |
| 235.0086 | 1150.44  | 1021.028 | 44377.41 | 512.1733 | 7281.715 | 935.0418 | 2624.248 | 204.5141 | 320.2688 |
| 235.0741 | 1150.446 | 1020.966 | 44377.94 | 512.1755 | 7281.744 | 935.0457 | 2624.329 | 204.5138 | 320.2685 |
| 235.1486 | 1150.46  | 1020.501 | 44378.54 | 512.1797 | 7281.788 | 935.0532 | 2624.42  | 204.5048 | 320.2596 |
| 235.2019 | 1150.457 | 1020.865 | 44378.97 | 512.1796 | 7281.801 | 935.0531 | 2624.486 | 204.5136 | 320.2683 |
| 235.2553 | 1150.457 | 1021.032 | 44379.39 | 512.1803 | 7281.82  | 935.0546 | 2624.552 | 204.5181 | 320.2728 |
| 235.3202 | 1150.462 | 1020.976 | 44379.92 | 512.1824 | 7281.848 | 935.0584 | 2624.631 | 204.5179 | 320.2726 |
| 235.3937 | 1150.476 | 1020.557 | 44380.51 | 512.1865 | 7281.89  | 935.0654 | 2624.721 | 204.51   | 320.2647 |

|          |          |          |          |          |          |          |          |          |          |
|----------|----------|----------|----------|----------|----------|----------|----------|----------|----------|
| 235.4606 | 1150.489 | 1020.108 | 44381.05 | 512.1904 | 7281.93  | 935.0724 | 2624.803 | 204.5013 | 320.2561 |
| 235.5147 | 1150.482 | 1020.659 | 44381.47 | 512.1894 | 7281.938 | 935.0709 | 2624.869 | 204.5141 | 320.2688 |
| 235.565  | 1150.478 | 1021.01  | 44381.87 | 512.1892 | 7281.951 | 935.0708 | 2624.931 | 204.5226 | 320.2772 |
| 235.6236 | 1150.481 | 1021.053 | 44382.34 | 512.1907 | 7281.974 | 935.0734 | 2625.002 | 204.5245 | 320.2791 |
| 235.6947 | 1150.49  | 1020.845 | 44382.91 | 512.1936 | 7282.009 | 935.0787 | 2625.089 | 204.521  | 320.2757 |
| 235.7671 | 1150.508 | 1020.202 | 44383.49 | 512.1986 | 7282.056 | 935.0875 | 2625.178 | 204.5082 | 320.2629 |
| 235.827  | 1150.509 | 1020.333 | 44383.96 | 512.1997 | 7282.078 | 935.0895 | 2625.25  | 204.512  | 320.2667 |
| 235.8771 | 1150.501 | 1020.914 | 44384.36 | 512.1984 | 7282.084 | 935.0876 | 2625.311 | 204.5254 | 320.28   |
| 235.9302 | 1150.501 | 1021.079 | 44384.78 | 512.1992 | 7282.102 | 935.089  | 2625.375 | 204.5299 | 320.2844 |
| 235.9956 | 1150.506 | 1021.017 | 44385.3  | 512.2013 | 7282.131 | 935.0928 | 2625.455 | 204.5296 | 320.2841 |
| 236.0701 | 1150.521 | 1020.552 | 44385.89 | 512.2055 | 7282.173 | 935.1002 | 2625.545 | 204.5206 | 320.2753 |
| 236.1235 | 1150.517 | 1020.916 | 44386.31 | 512.2053 | 7282.186 | 935.1001 | 2625.61  | 204.5294 | 320.2839 |
| 236.1769 | 1150.517 | 1021.083 | 44386.73 | 512.206  | 7282.204 | 935.1016 | 2625.675 | 204.5338 | 320.2884 |
| 236.2418 | 1150.523 | 1021.027 | 44387.24 | 512.2081 | 7282.233 | 935.1053 | 2625.753 | 204.5336 | 320.2882 |
| 236.3153 | 1150.536 | 1020.608 | 44387.82 | 512.2121 | 7282.274 | 935.1123 | 2625.842 | 204.5257 | 320.2803 |
| 236.3822 | 1150.549 | 1020.159 | 44388.35 | 512.216  | 7282.313 | 935.1192 | 2625.923 | 204.5169 | 320.2716 |
| 236.4363 | 1150.542 | 1020.71  | 44388.77 | 512.215  | 7282.321 | 935.1176 | 2625.988 | 204.5298 | 320.2844 |
| 236.4865 | 1150.538 | 1021.061 | 44389.16 | 512.2148 | 7282.333 | 935.1175 | 2626.048 | 204.5382 | 320.2927 |
| 236.5452 | 1150.541 | 1021.104 | 44389.62 | 512.2162 | 7282.356 | 935.1201 | 2626.119 | 204.5401 | 320.2946 |
| 236.6163 | 1150.55  | 1020.896 | 44390.18 | 512.2191 | 7282.39  | 935.1253 | 2626.204 | 204.5366 | 320.2911 |
| 236.6887 | 1150.567 | 1020.252 | 44390.75 | 512.2241 | 7282.437 | 935.134  | 2626.291 | 204.5238 | 320.2784 |
| 236.7485 | 1150.569 | 1020.384 | 44391.21 | 512.2251 | 7282.458 | 935.136  | 2626.363 | 204.5276 | 320.2821 |
| 236.7987 | 1150.56  | 1020.964 | 44391.6  | 512.2238 | 7282.464 | 935.134  | 2626.423 | 204.541  | 320.2954 |
| 236.8517 | 1150.56  | 1021.13  | 44392.01 | 512.2245 | 7282.481 | 935.1353 | 2626.486 | 204.5454 | 320.2998 |
| 236.9172 | 1150.566 | 1021.068 | 44392.52 | 512.2266 | 7282.509 | 935.1391 | 2626.564 | 204.5451 | 320.2995 |
| 236.9917 | 1150.58  | 1020.603 | 44393.1  | 512.2308 | 7282.552 | 935.1465 | 2626.654 | 204.5361 | 320.2906 |
| 237.0451 | 1150.576 | 1020.966 | 44393.51 | 512.2306 | 7282.564 | 935.1463 | 2626.717 | 204.5448 | 320.2993 |
| 237.0985 | 1150.576 | 1021.133 | 44393.92 | 512.2313 | 7282.582 | 935.1477 | 2626.781 | 204.5493 | 320.3037 |
| 237.1634 | 1150.582 | 1021.077 | 44394.43 | 512.2333 | 7282.61  | 935.1514 | 2626.858 | 204.5491 | 320.3035 |
| 237.2369 | 1150.595 | 1020.658 | 44395    | 512.2373 | 7282.65  | 935.1583 | 2626.945 | 204.5411 | 320.2955 |
| 237.3038 | 1150.608 | 1020.209 | 44395.52 | 512.2412 | 7282.689 | 935.1651 | 2627.025 | 204.5323 | 320.2869 |
| 237.3579 | 1150.601 | 1020.76  | 44395.93 | 512.2401 | 7282.697 | 935.1635 | 2627.089 | 204.5452 | 320.2996 |
| 237.4081 | 1150.597 | 1021.111 | 44396.31 | 512.2398 | 7282.708 | 935.1633 | 2627.149 | 204.5536 | 320.3079 |
| 237.4667 | 1150.6   | 1021.154 | 44396.76 | 512.2412 | 7282.731 | 935.1659 | 2627.218 | 204.5554 | 320.3097 |

|          |          |          |          |          |          |          |          |          |          |
|----------|----------|----------|----------|----------|----------|----------|----------|----------|----------|
| 237.5379 | 1150.609 | 1020.946 | 44397.31 | 512.2441 | 7282.765 | 935.171  | 2627.302 | 204.5519 | 320.3063 |
| 237.6103 | 1150.626 | 1020.302 | 44397.87 | 512.2491 | 7282.81  | 935.1796 | 2627.388 | 204.539  | 320.2935 |
| 237.6701 | 1150.627 | 1020.434 | 44398.33 | 512.2501 | 7282.831 | 935.1816 | 2627.459 | 204.5428 | 320.2973 |
| 237.7203 | 1150.619 | 1021.014 | 44398.7  | 512.2488 | 7282.836 | 935.1795 | 2627.518 | 204.5562 | 320.3106 |
| 237.7733 | 1150.619 | 1021.179 | 44399.11 | 512.2494 | 7282.854 | 935.1808 | 2627.58  | 204.5606 | 320.3149 |
| 237.8388 | 1150.624 | 1021.117 | 44399.61 | 512.2515 | 7282.881 | 935.1845 | 2627.657 | 204.5603 | 320.3146 |
| 237.9133 | 1150.638 | 1020.652 | 44400.18 | 512.2556 | 7282.923 | 935.1918 | 2627.745 | 204.5513 | 320.3057 |
| 237.9667 | 1150.635 | 1021.016 | 44400.58 | 512.2554 | 7282.935 | 935.1916 | 2627.808 | 204.56   | 320.3143 |
| 238.02   | 1150.635 | 1021.183 | 44400.99 | 512.2561 | 7282.952 | 935.193  | 2627.87  | 204.5645 | 320.3187 |
| 238.0849 | 1150.64  | 1021.127 | 44401.48 | 512.2581 | 7282.98  | 935.1966 | 2627.946 | 204.5642 | 320.3185 |
| 238.1585 | 1150.653 | 1020.707 | 44402.04 | 512.262  | 7283.02  | 935.2034 | 2628.033 | 204.5562 | 320.3105 |
| 238.2253 | 1150.666 | 1020.258 | 44402.55 | 512.2658 | 7283.058 | 935.2102 | 2628.111 | 204.5474 | 320.3018 |
| 238.2794 | 1150.659 | 1020.809 | 44402.95 | 512.2647 | 7283.065 | 935.2086 | 2628.174 | 204.5602 | 320.3145 |
| 238.3297 | 1150.655 | 1021.16  | 44403.33 | 512.2645 | 7283.076 | 935.2083 | 2628.233 | 204.5686 | 320.3229 |
| 238.3883 | 1150.657 | 1021.203 | 44403.77 | 512.2658 | 7283.099 | 935.2108 | 2628.301 | 204.5705 | 320.3247 |
| 238.4594 | 1150.666 | 1020.994 | 44404.31 | 512.2687 | 7283.132 | 935.2159 | 2628.384 | 204.567  | 320.3212 |
| 238.5318 | 1150.684 | 1020.351 | 44404.86 | 512.2736 | 7283.177 | 935.2244 | 2628.469 | 204.554  | 320.3084 |
| 238.5917 | 1150.685 | 1020.482 | 44405.31 | 512.2746 | 7283.197 | 935.2263 | 2628.538 | 204.5578 | 320.3121 |
| 238.6418 | 1150.676 | 1021.063 | 44405.68 | 512.2732 | 7283.202 | 935.2242 | 2628.596 | 204.5712 | 320.3254 |
| 238.6949 | 1150.676 | 1021.228 | 44406.08 | 512.2739 | 7283.219 | 935.2255 | 2628.658 | 204.5756 | 320.3298 |
| 238.7603 | 1150.682 | 1021.166 | 44406.57 | 512.2759 | 7283.247 | 935.2292 | 2628.734 | 204.5752 | 320.3294 |
| 238.8348 | 1150.696 | 1020.701 | 44407.13 | 512.28   | 7283.288 | 935.2364 | 2628.82  | 204.5662 | 320.3204 |
| 238.8882 | 1150.692 | 1021.064 | 44407.52 | 512.2797 | 7283.299 | 935.2361 | 2628.882 | 204.5749 | 320.3291 |
| 238.9416 | 1150.692 | 1021.231 | 44407.92 | 512.2804 | 7283.316 | 935.2374 | 2628.943 | 204.5793 | 320.3335 |
| 239.0065 | 1150.697 | 1021.175 | 44408.4  | 512.2823 | 7283.343 | 935.241  | 2629.018 | 204.5791 | 320.3332 |
| 239.08   | 1150.71  | 1020.755 | 44408.95 | 512.2862 | 7283.383 | 935.2478 | 2629.103 | 204.571  | 320.3252 |
| 239.1469 | 1150.723 | 1020.306 | 44409.45 | 512.29   | 7283.42  | 935.2545 | 2629.181 | 204.5622 | 320.3165 |
| 239.201  | 1150.715 | 1020.857 | 44409.85 | 512.2889 | 7283.427 | 935.2528 | 2629.243 | 204.575  | 320.3292 |
| 239.2512 | 1150.711 | 1021.208 | 44410.22 | 512.2886 | 7283.438 | 935.2524 | 2629.3   | 204.5834 | 320.3375 |
| 239.3099 | 1150.714 | 1021.251 | 44410.66 | 512.29   | 7283.46  | 935.2549 | 2629.368 | 204.5852 | 320.3393 |
| 239.381  | 1150.723 | 1021.042 | 44411.18 | 512.2928 | 7283.493 | 935.2599 | 2629.45  | 204.5817 | 320.3358 |
| 239.4534 | 1150.74  | 1020.399 | 44411.72 | 512.2976 | 7283.537 | 935.2684 | 2629.533 | 204.5688 | 320.323  |
| 239.5132 | 1150.741 | 1020.53  | 44412.16 | 512.2986 | 7283.557 | 935.2702 | 2629.601 | 204.5725 | 320.3267 |
| 239.5634 | 1150.733 | 1021.111 | 44412.53 | 512.2972 | 7283.562 | 935.2681 | 2629.659 | 204.5859 | 320.34   |

|          |          |          |          |          |          |          |          |          |          |
|----------|----------|----------|----------|----------|----------|----------|----------|----------|----------|
| 239.6164 | 1150.733 | 1021.276 | 44412.92 | 512.2978 | 7283.578 | 935.2693 | 2629.719 | 204.5903 | 320.3443 |
| 239.6819 | 1150.738 | 1021.214 | 44413.4  | 512.2998 | 7283.605 | 935.2729 | 2629.794 | 204.5899 | 320.3439 |
| 239.7564 | 1150.752 | 1020.748 | 44413.95 | 512.3039 | 7283.646 | 935.2801 | 2629.879 | 204.5808 | 320.3349 |
| 239.8098 | 1150.748 | 1021.112 | 44414.34 | 512.3036 | 7283.657 | 935.2798 | 2629.94  | 204.5895 | 320.3436 |
| 239.8632 | 1150.748 | 1021.279 | 44414.73 | 512.3042 | 7283.673 | 935.281  | 2630.001 | 204.5939 | 320.3479 |
| 239.9281 | 1150.753 | 1021.223 | 44415.2  | 512.3062 | 7283.7   | 935.2845 | 2630.074 | 204.5937 | 320.3477 |
| 240      | 1150.764 | 1020.883 | 44415.73 | 512.3096 | 7283.736 | 935.2906 | 2630.156 | 204.5873 | 320.3414 |
